# Supplementary material for: No Evidence of the Effect of Extreme Weather Events on Annual Occurrence of Four Groups of Ectothermic Species
Source: PubMed Central journal article supplement (PMC4201516; doi:10.1371/journal.pone.0110219), 2014-10-17

**Pyronia tithonus**

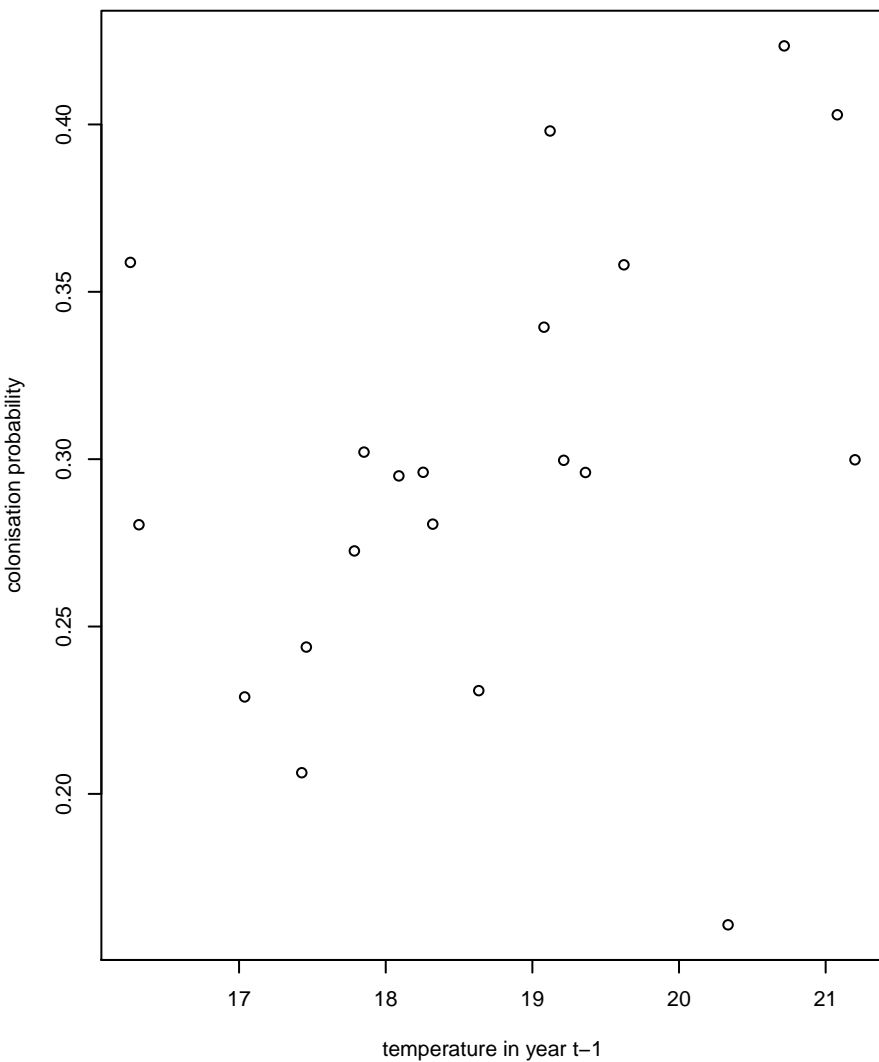

**Pyronia tithonus**

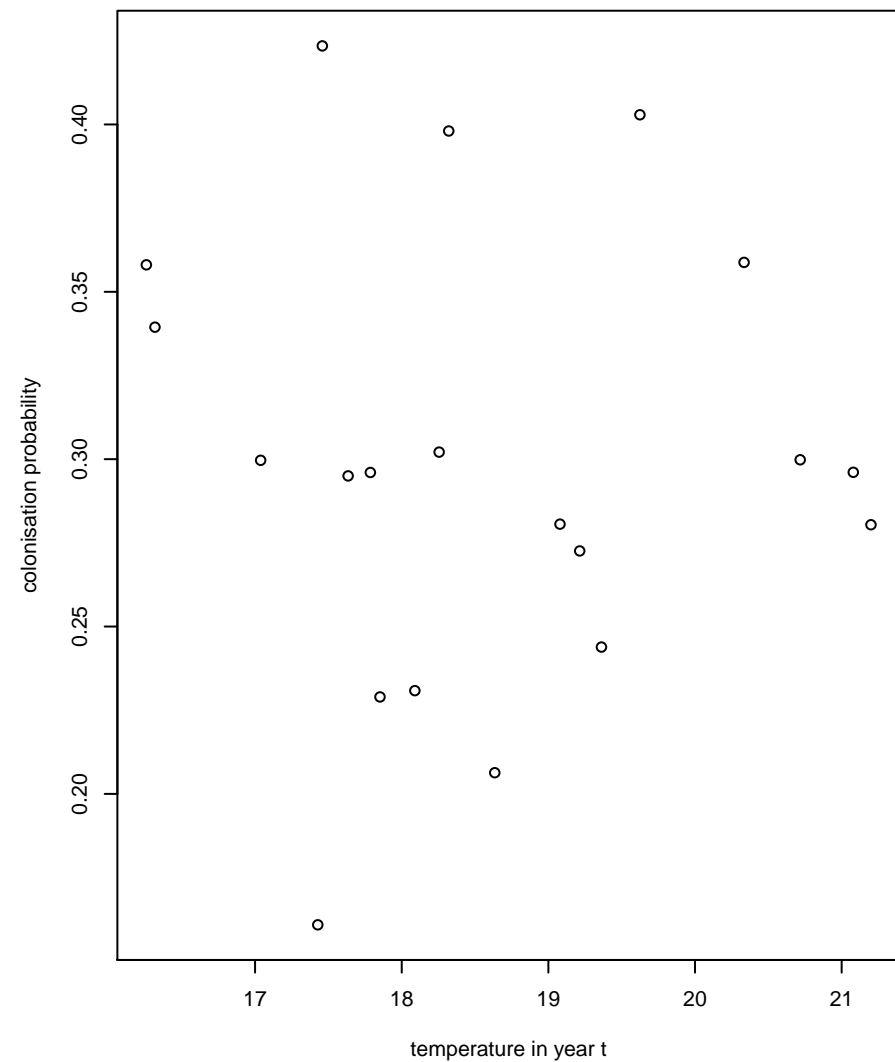

**Maniola jurtina**

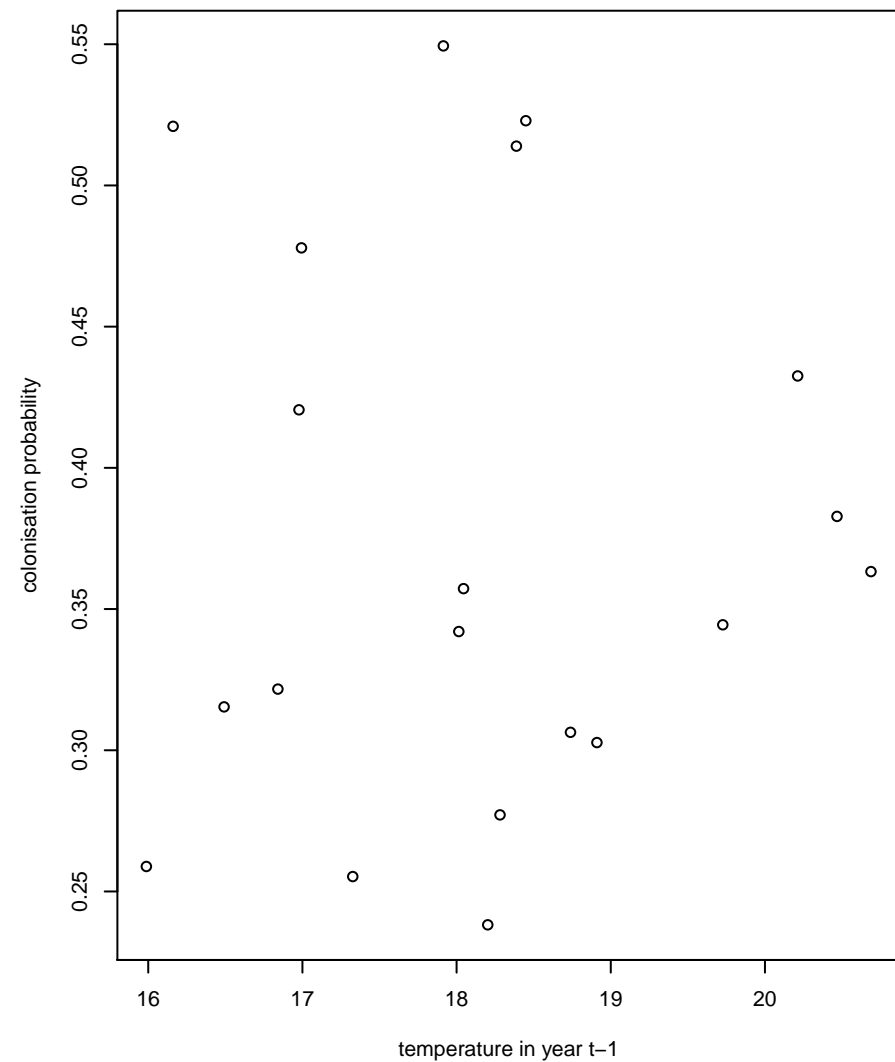

**Maniola jurtina**

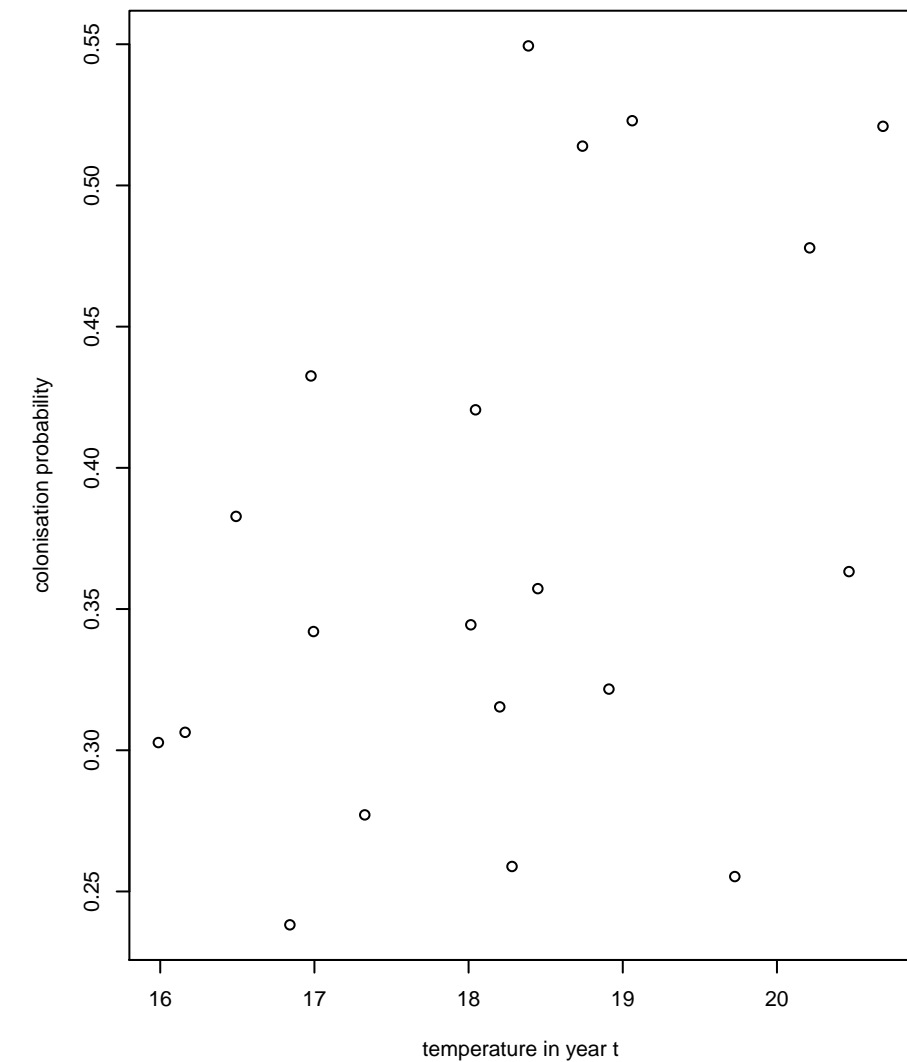

**Hipparchia semele**

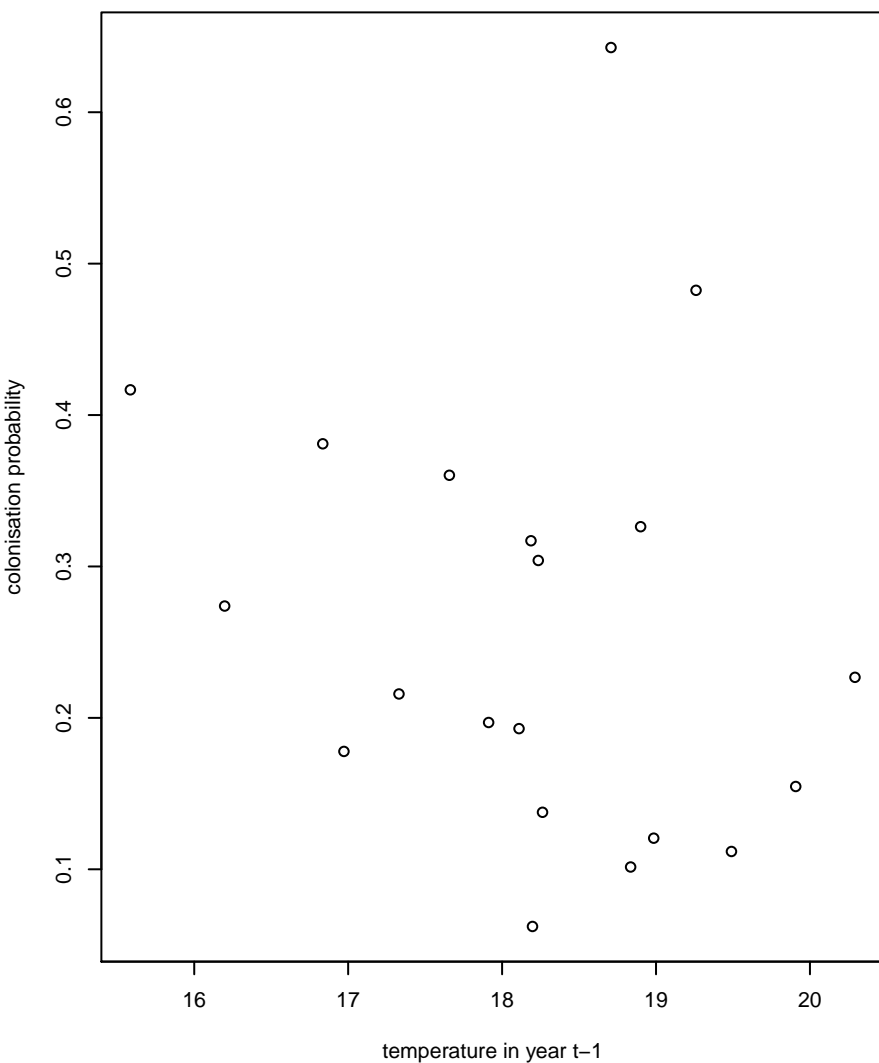

**Hipparchia semele**

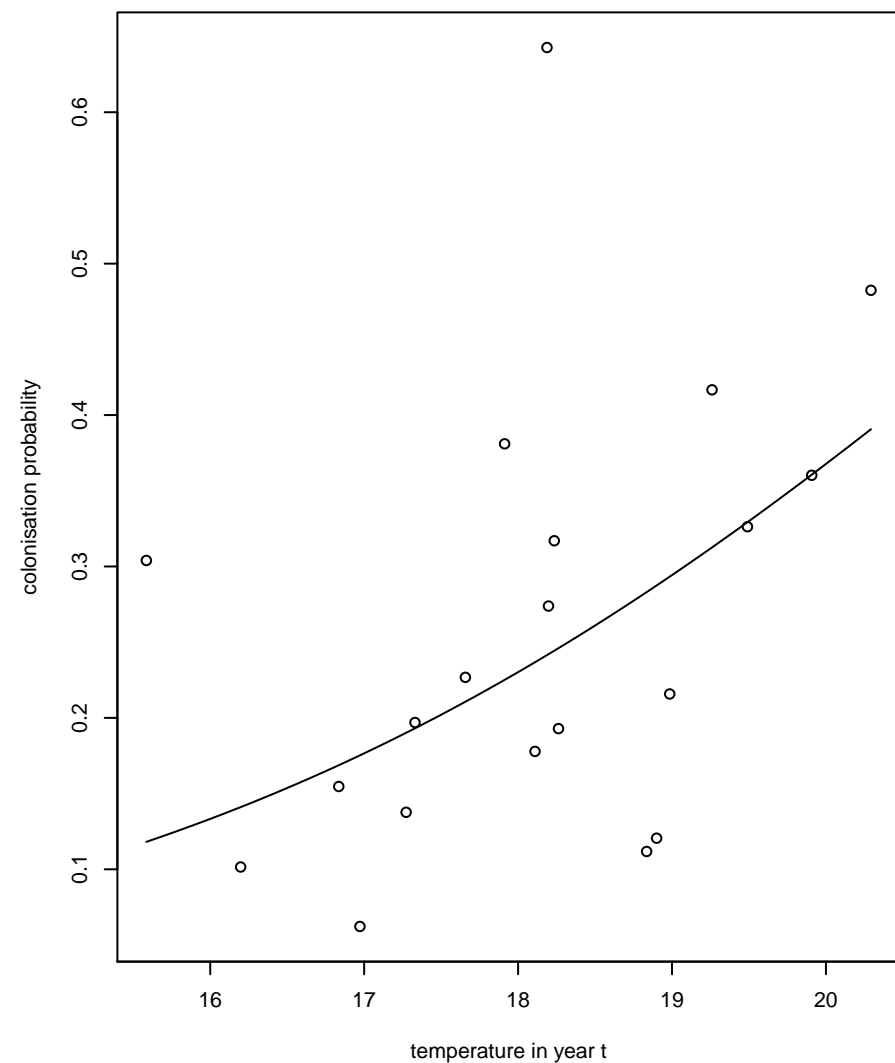

**Papilio machaon**

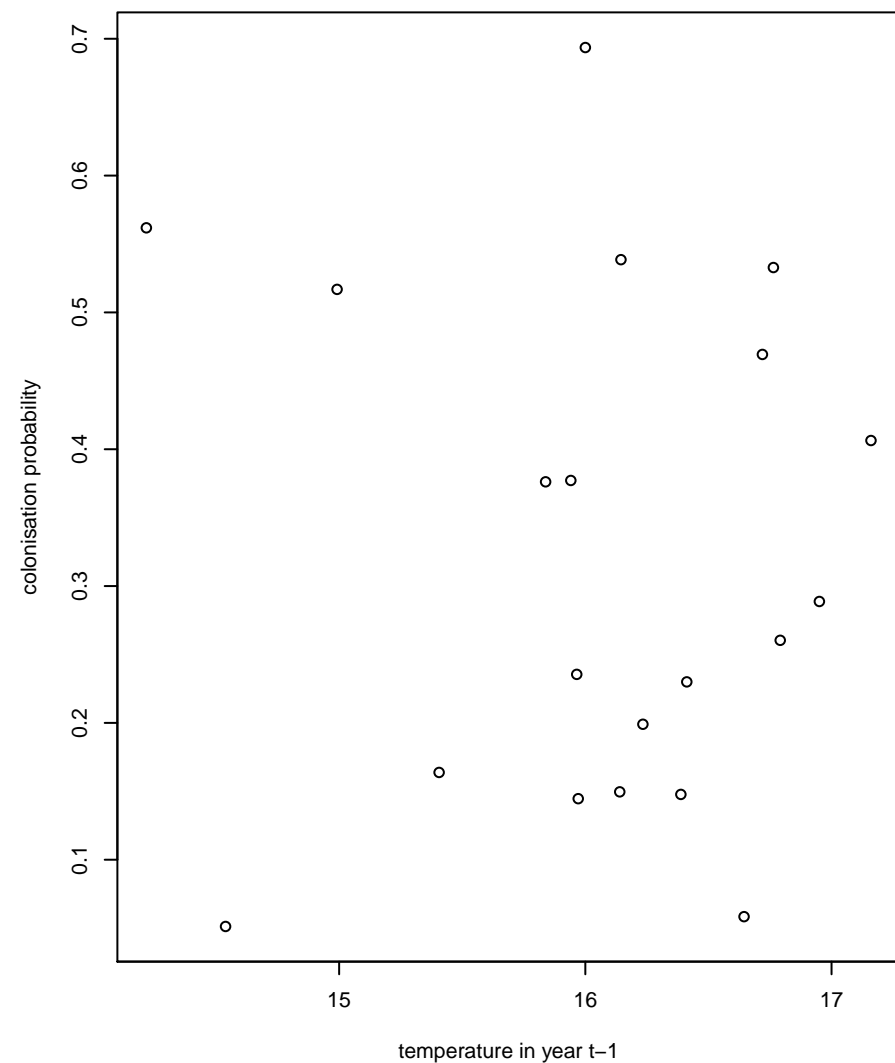

**Papilio machaon**

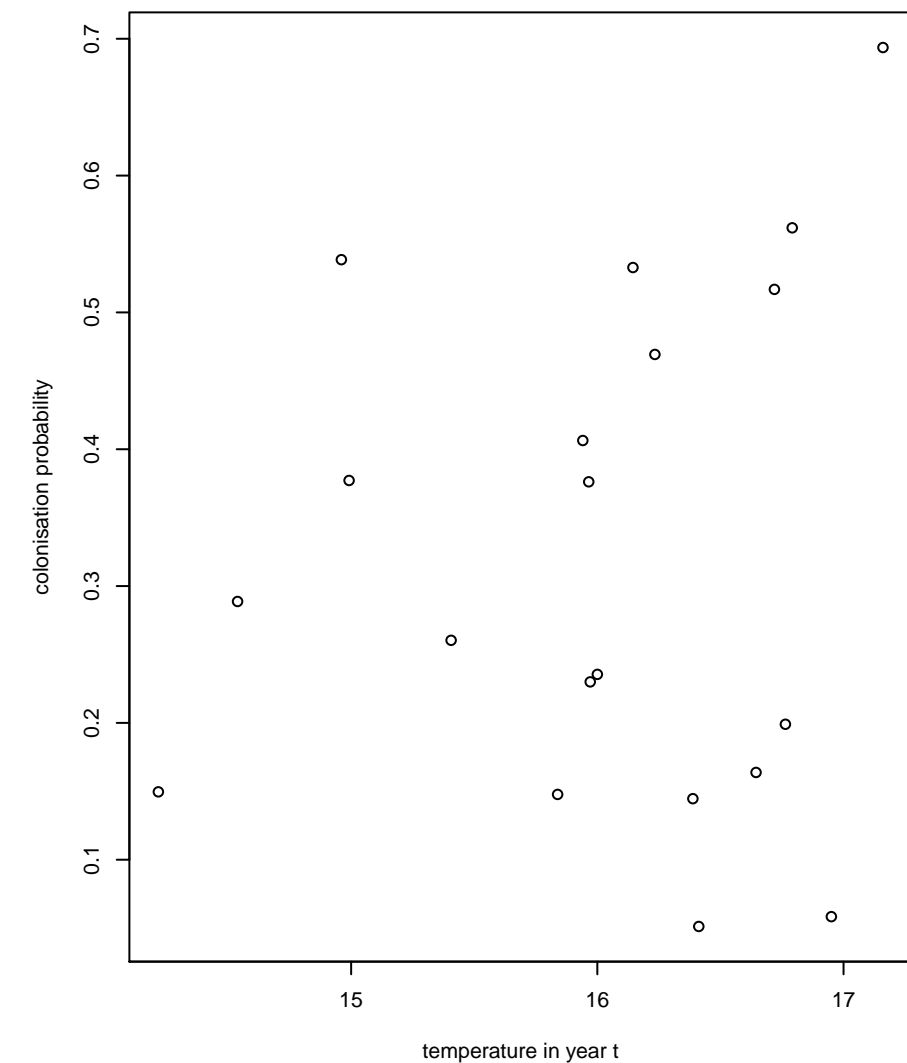

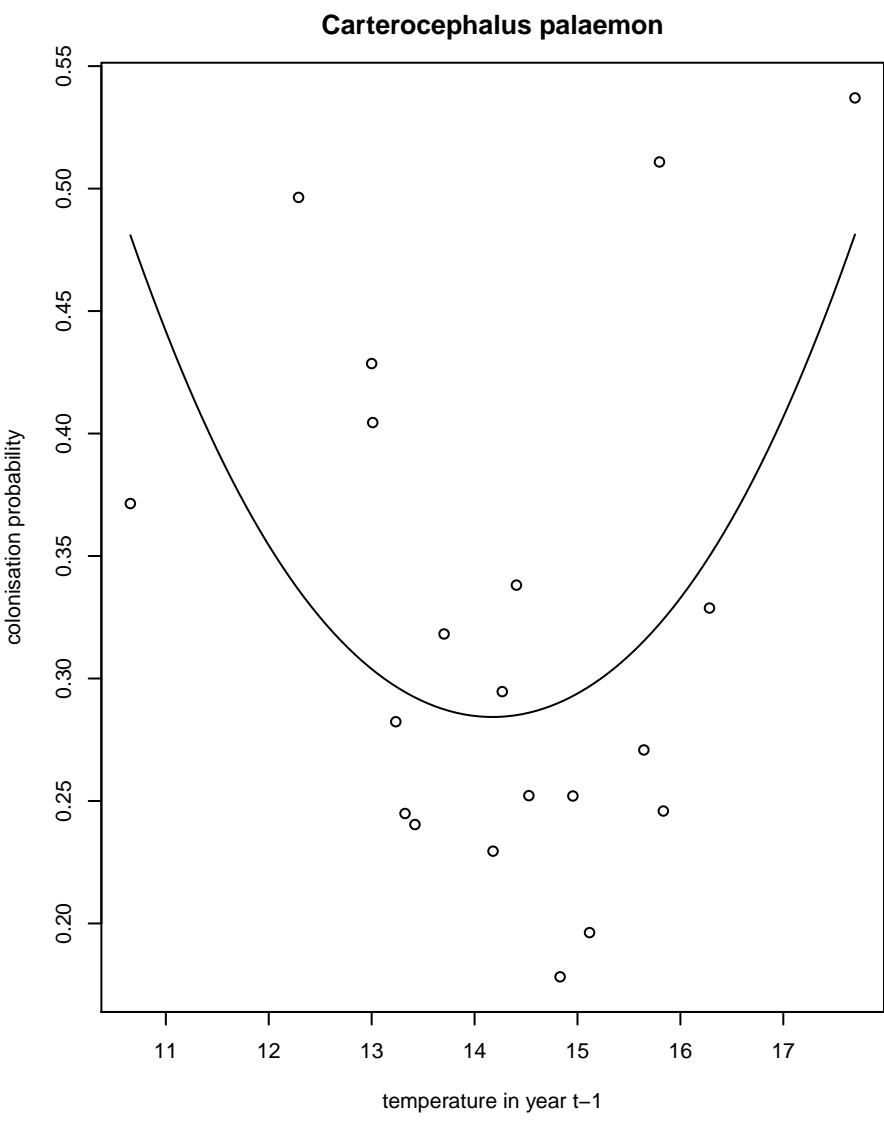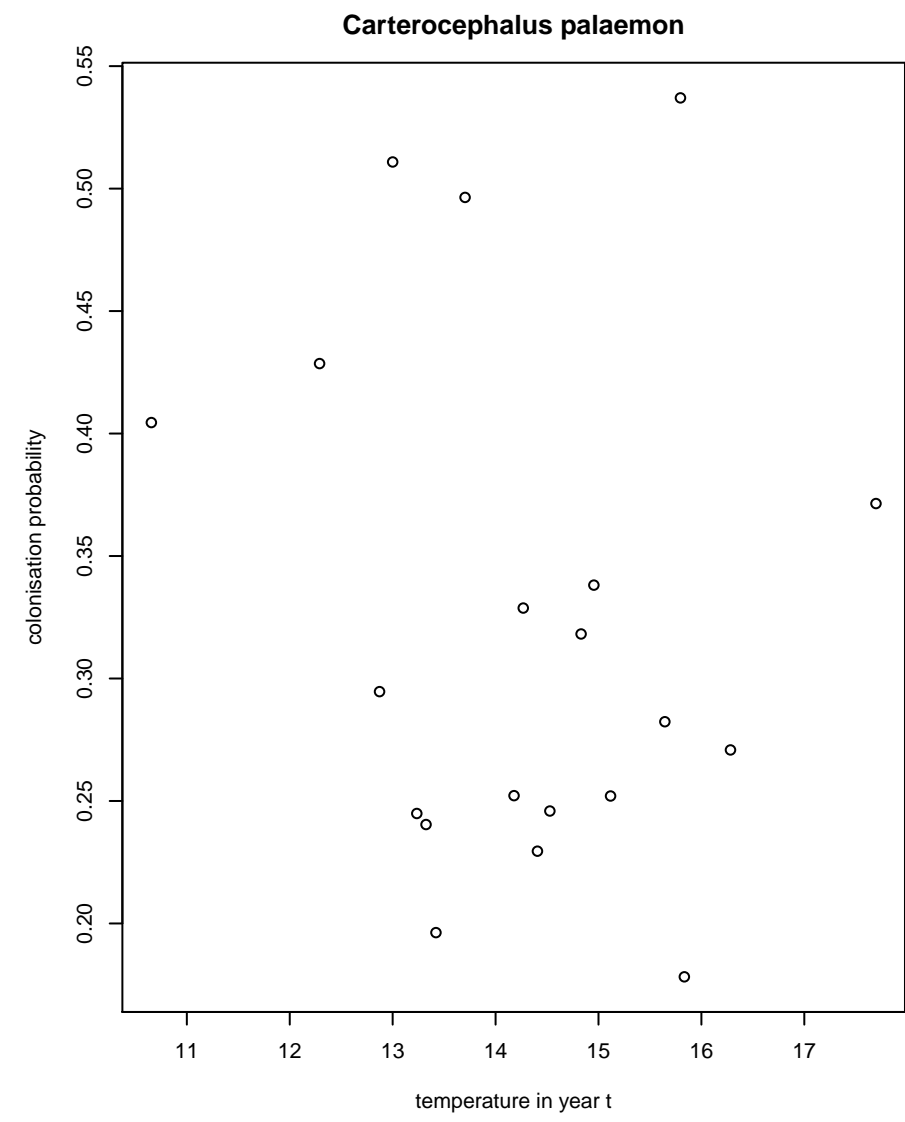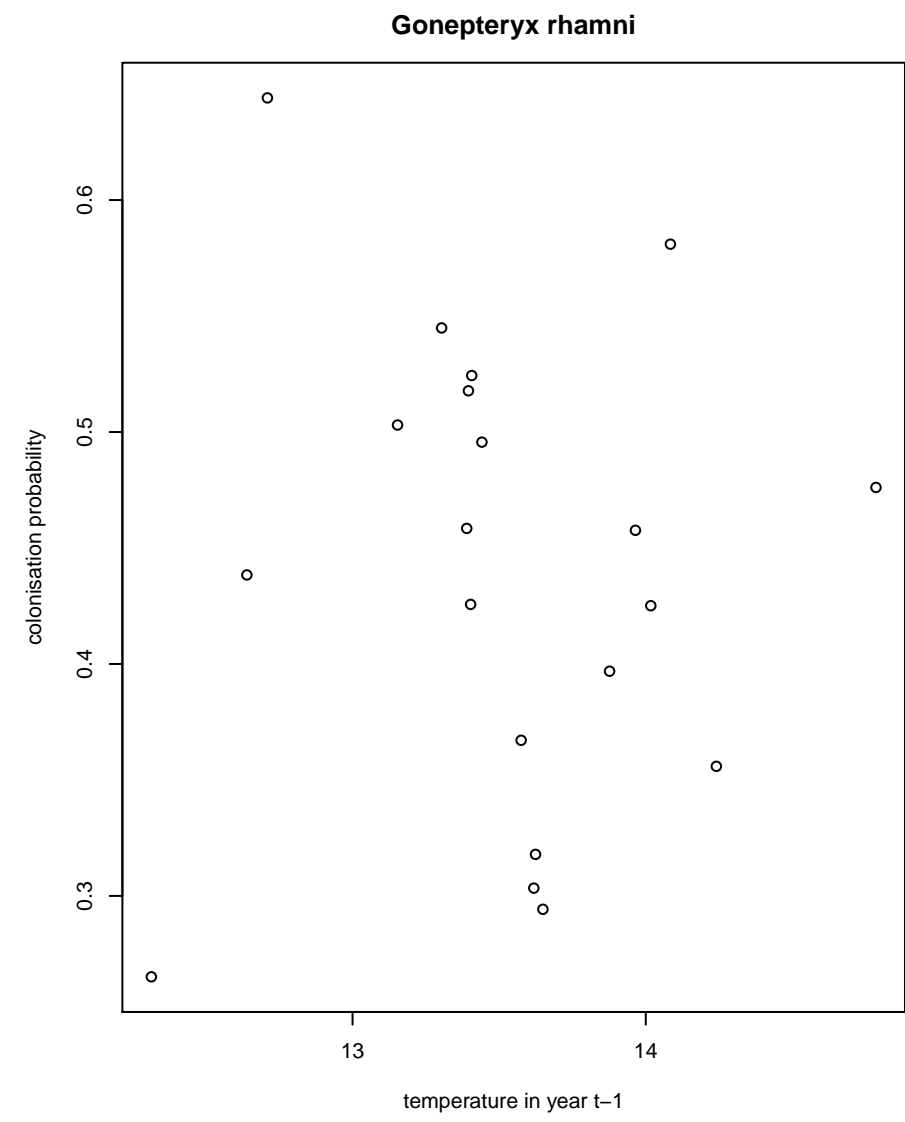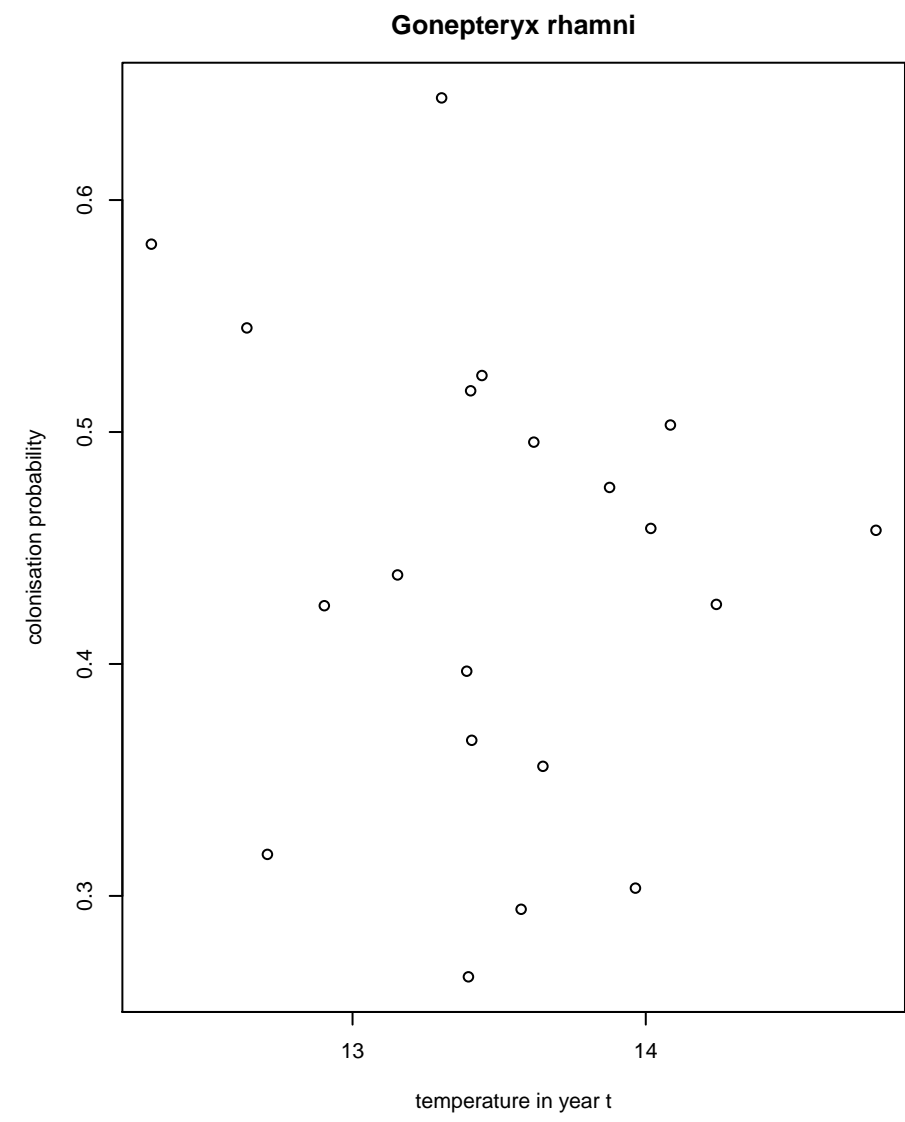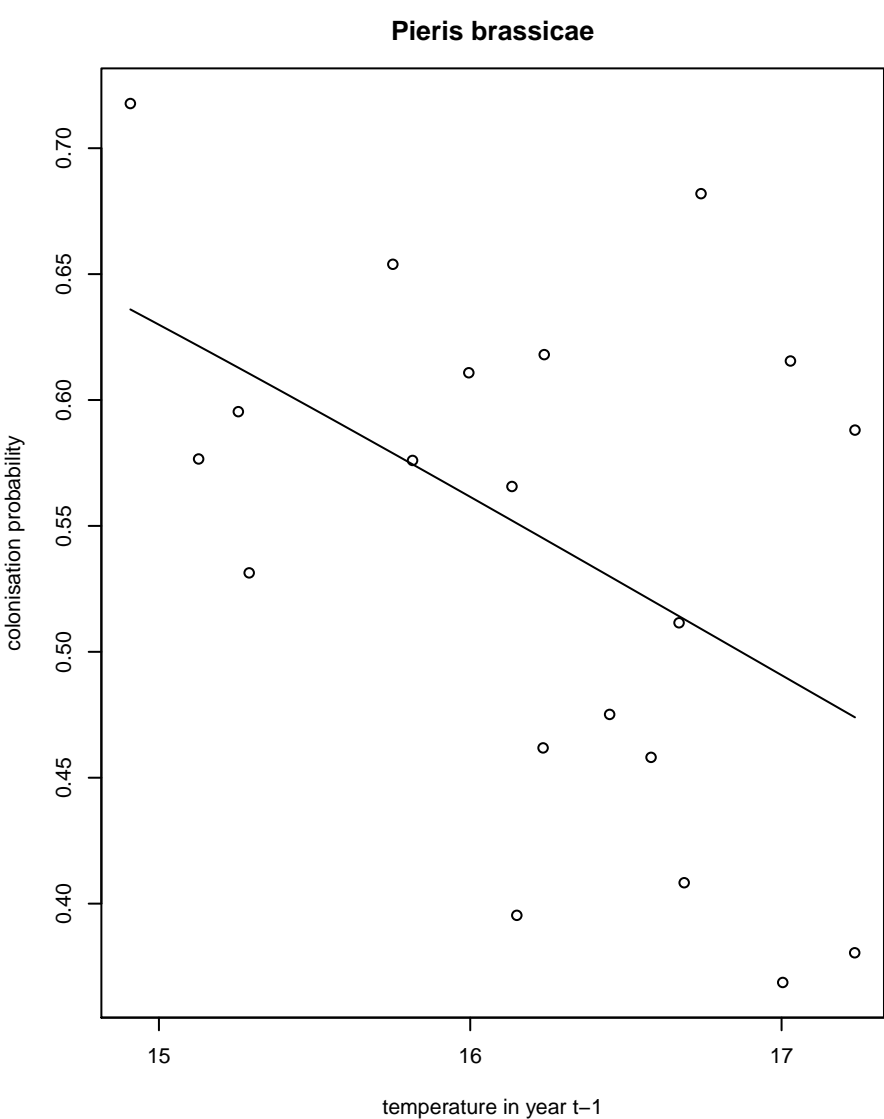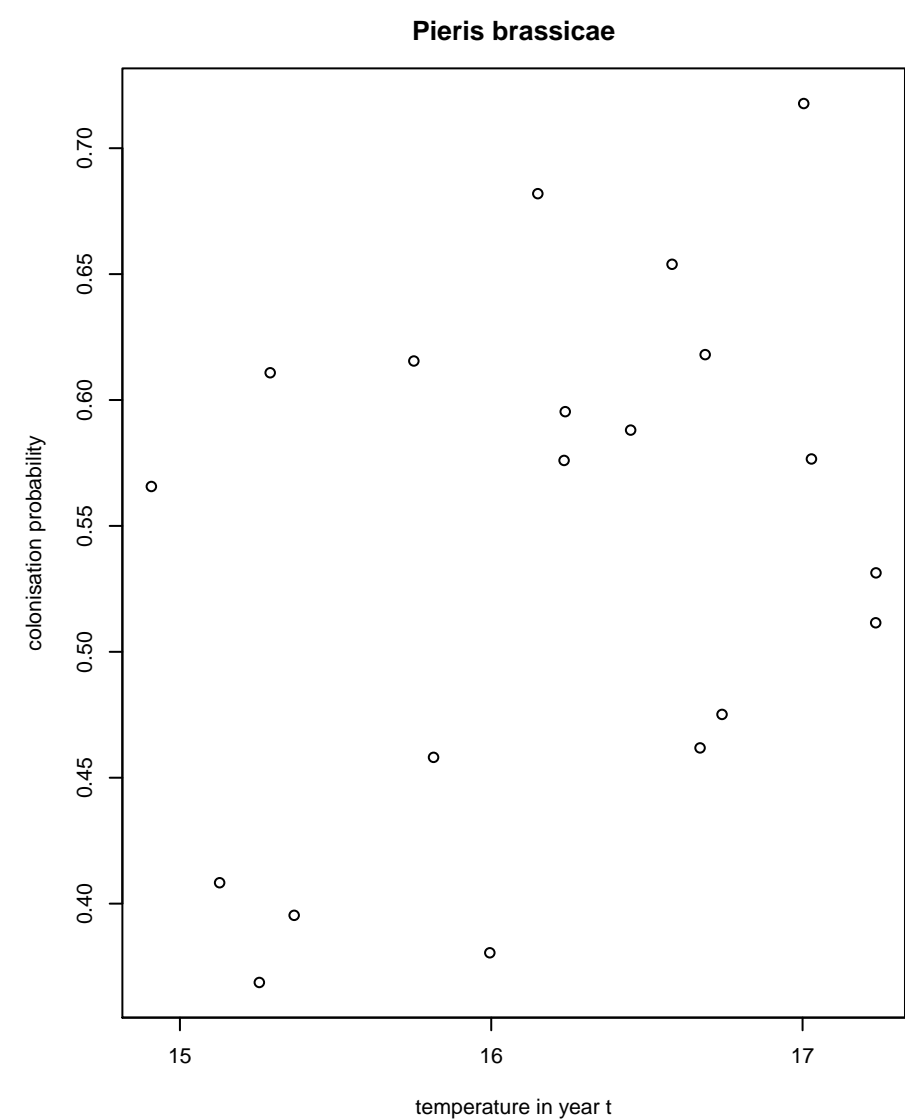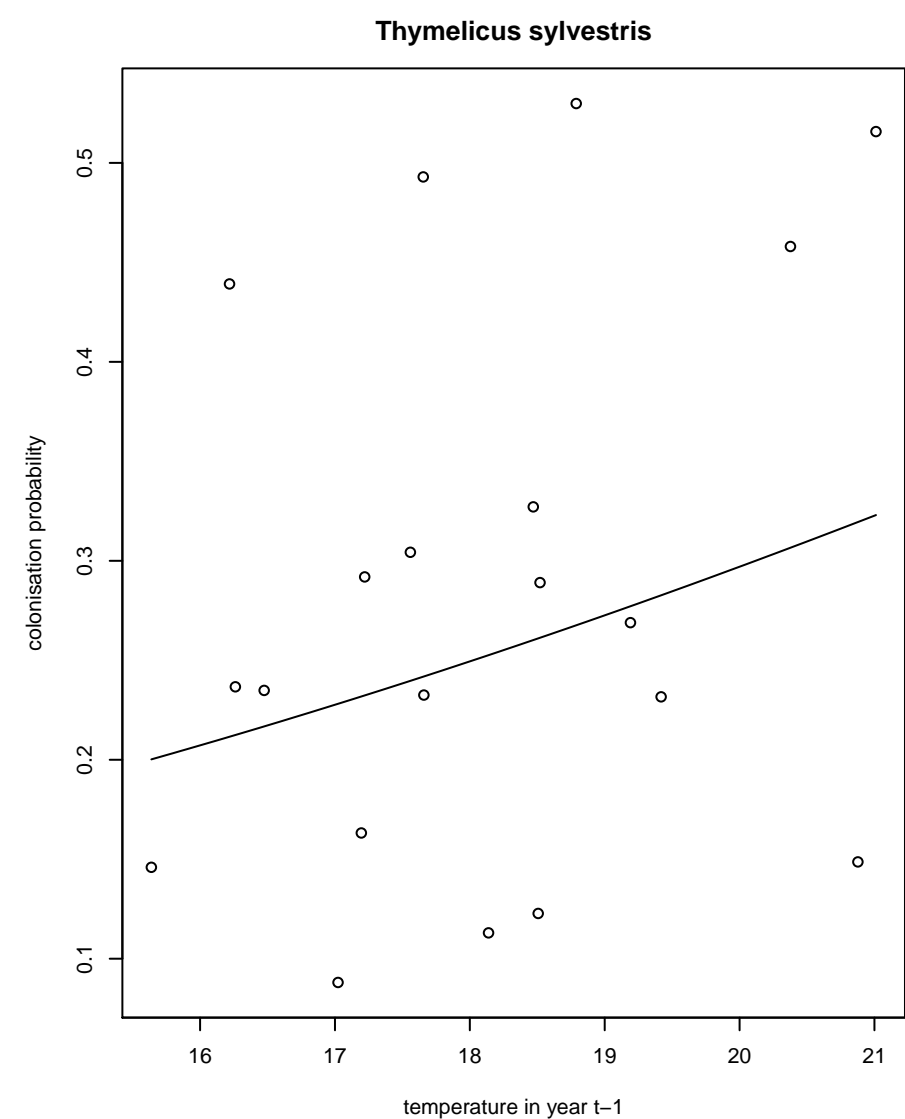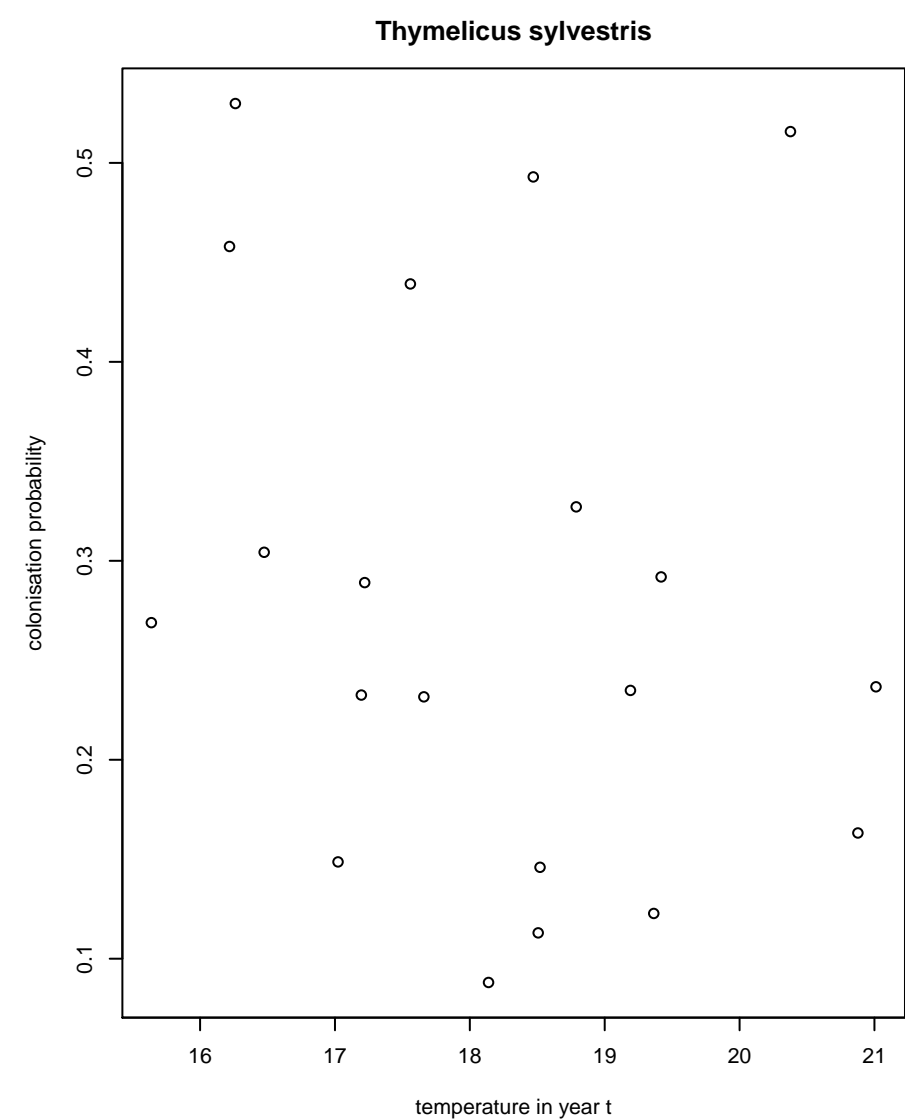

**Pieris rapae**

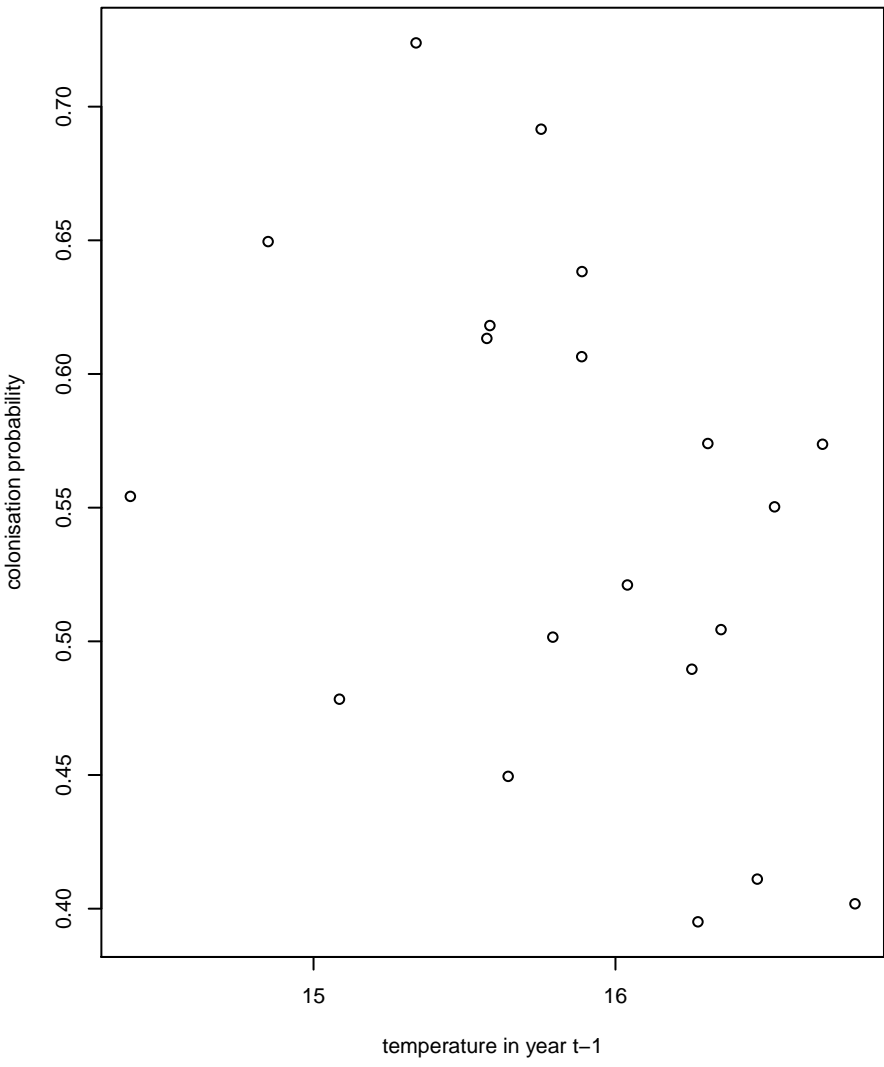

**Pieris rapae**

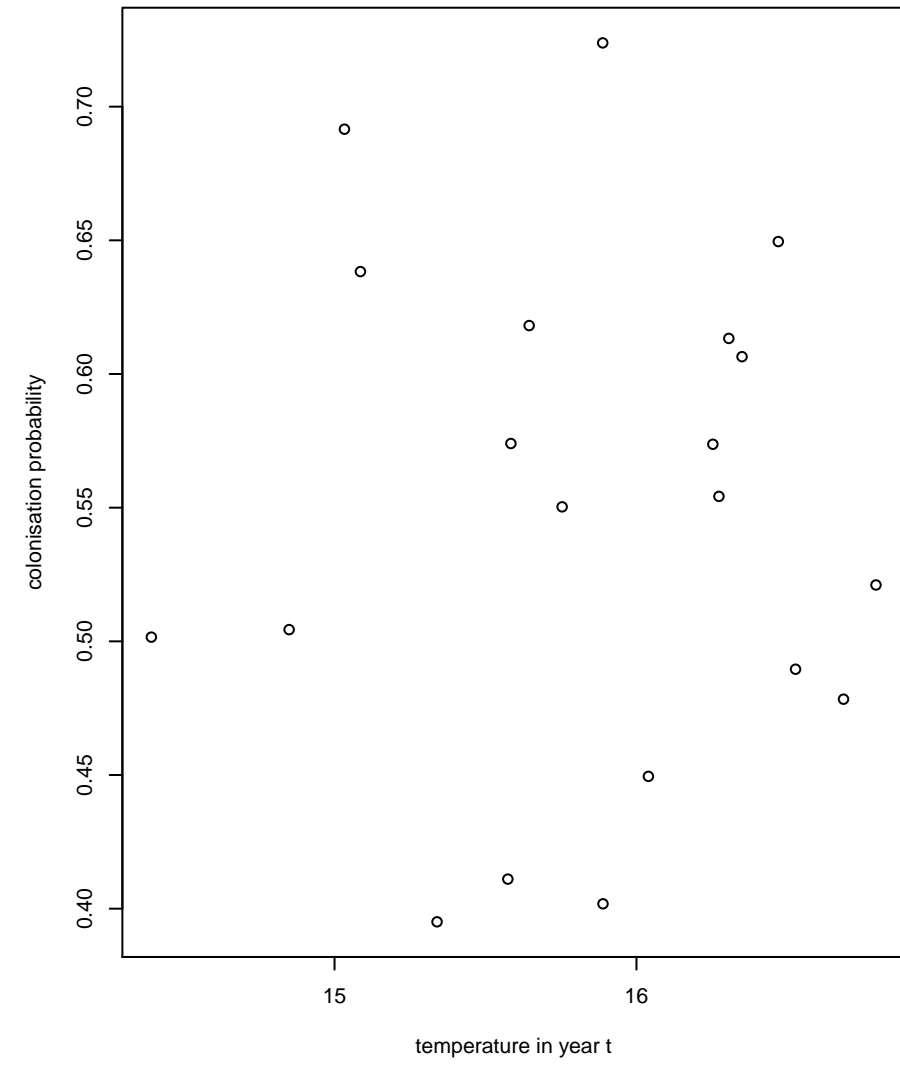

**Pieris napi**

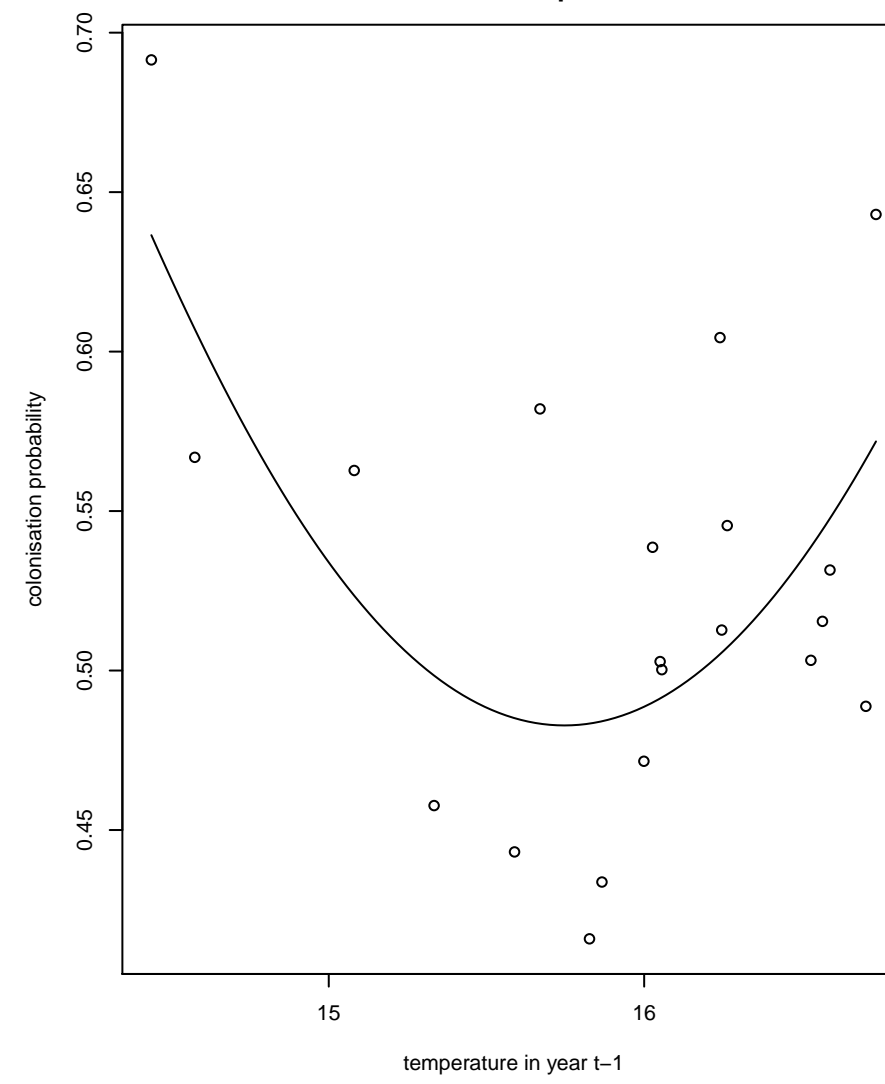

**Pieris napi**

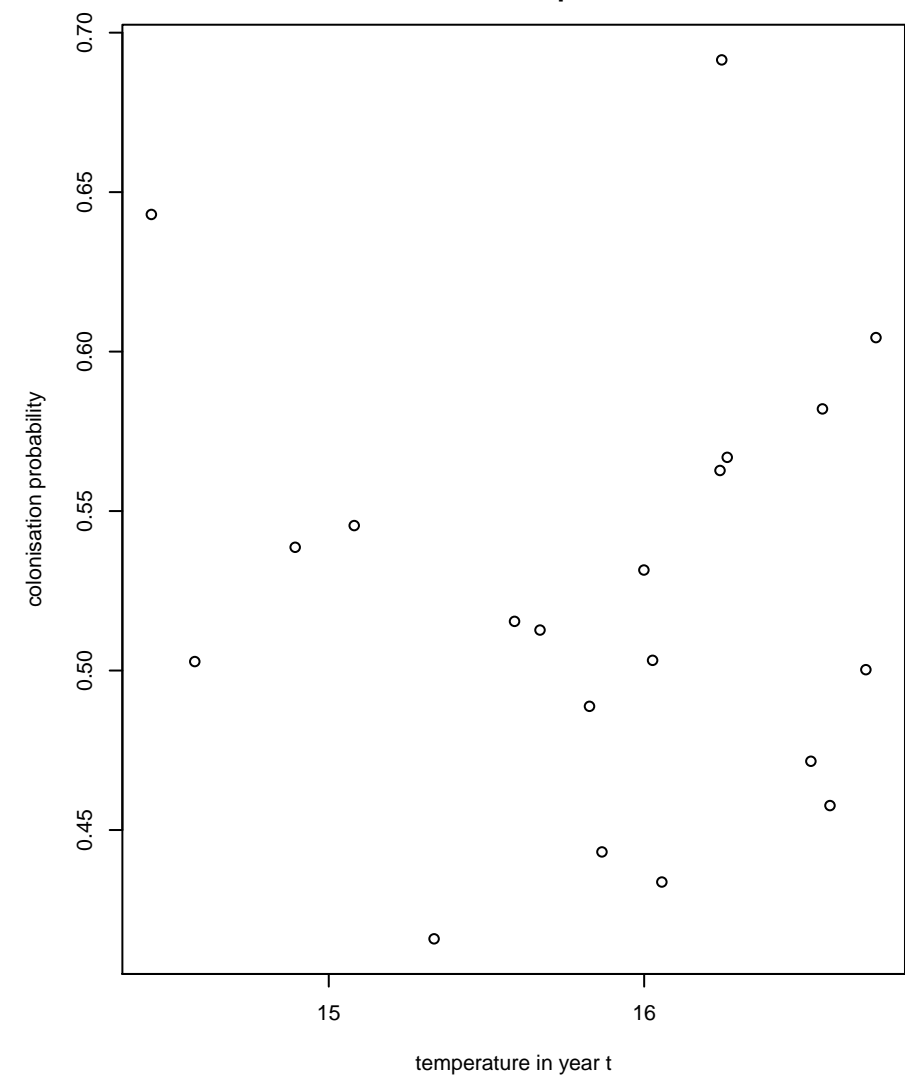

**Anthocharis cardamines**

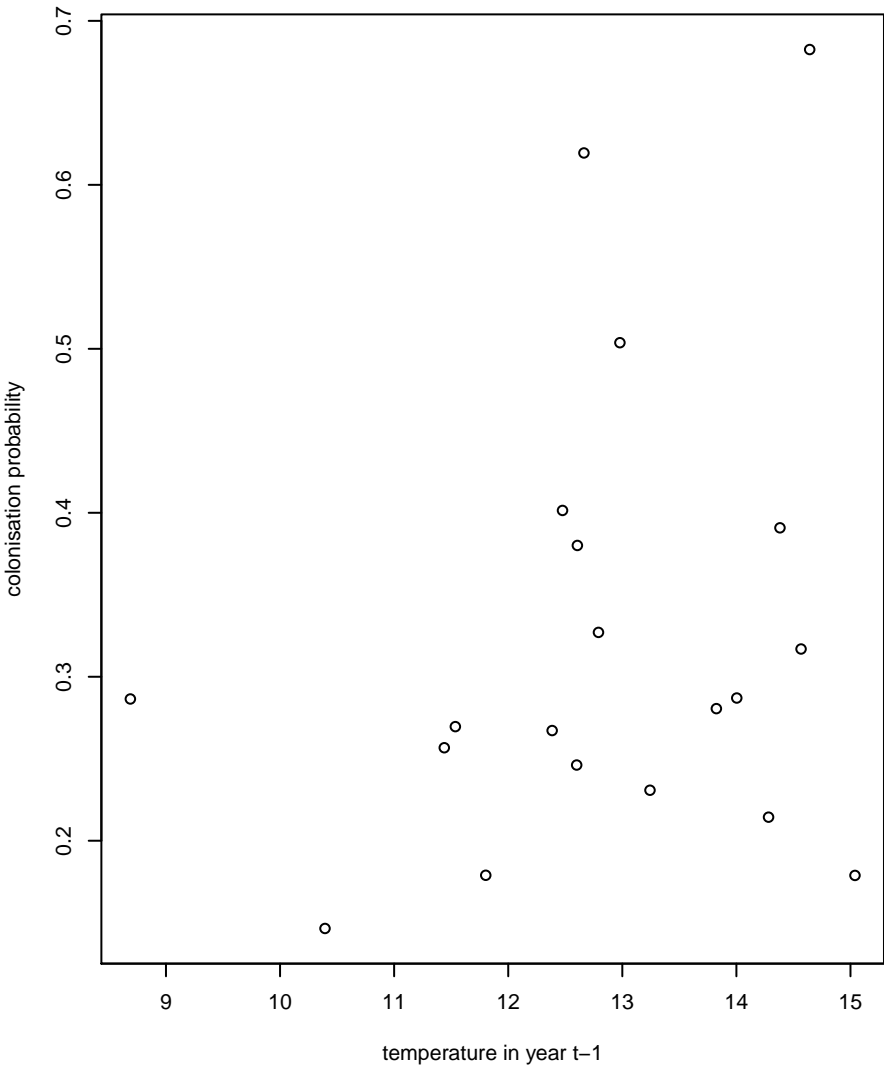

**Anthocharis cardamines**

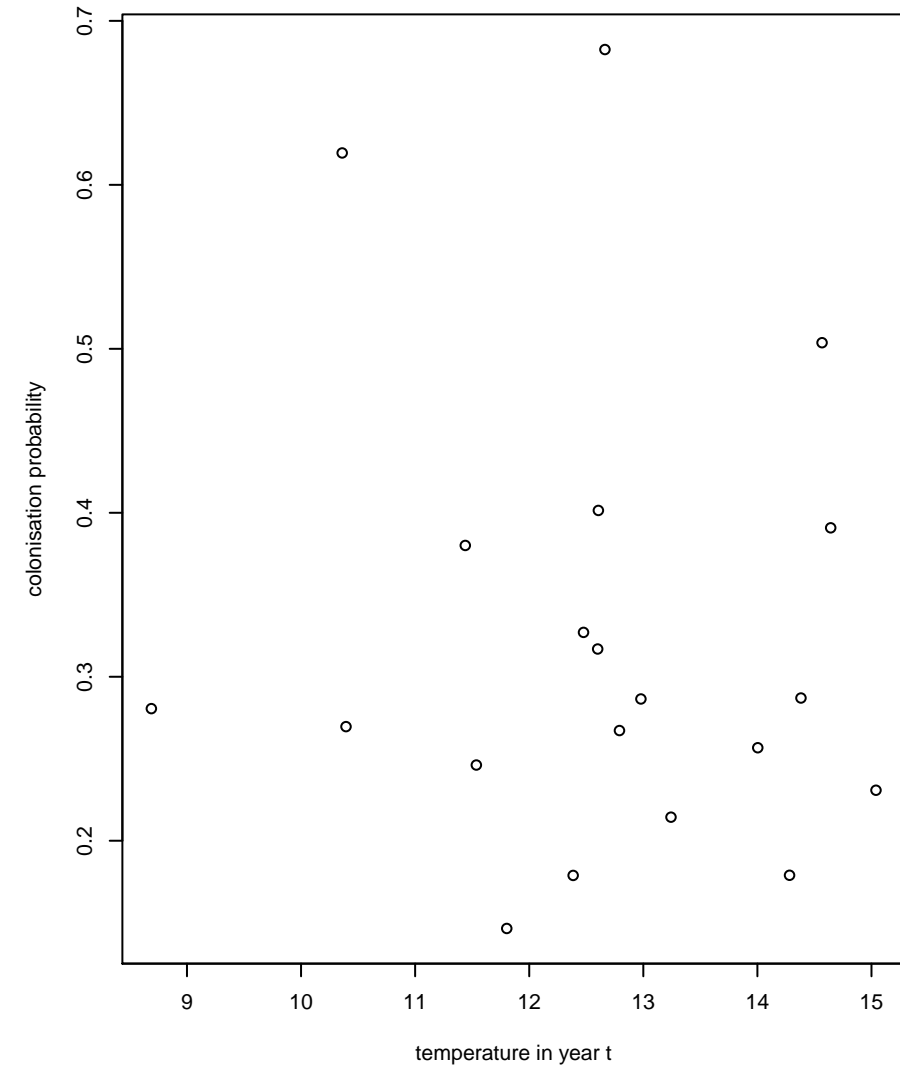

**Callophrys rubi**

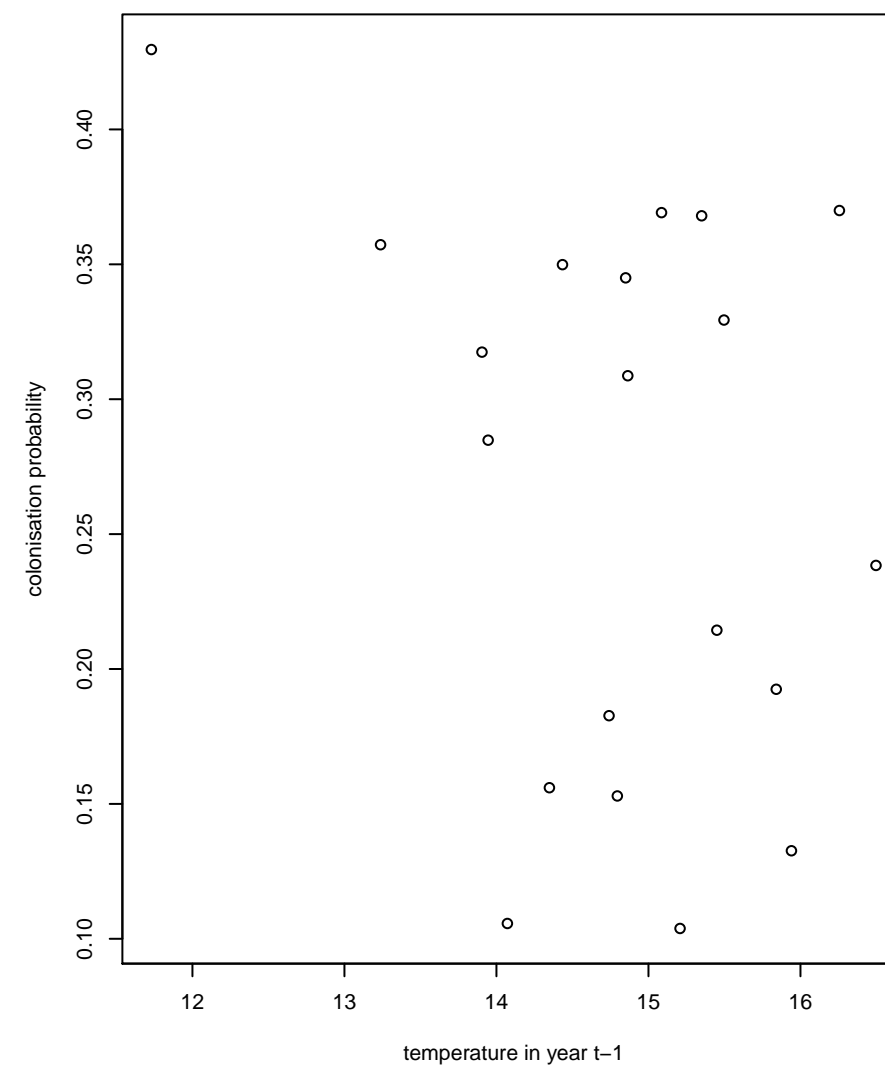

**Callophrys rubi**

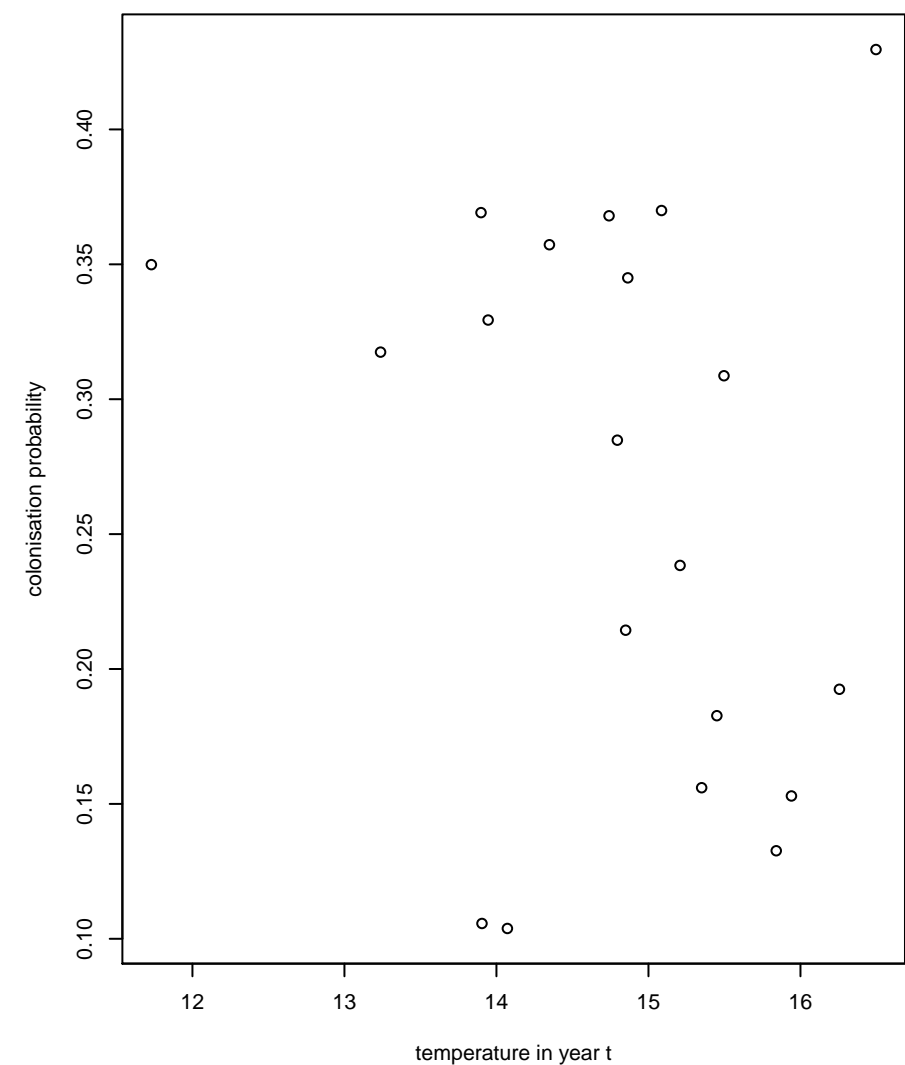

**Favonius quercus**

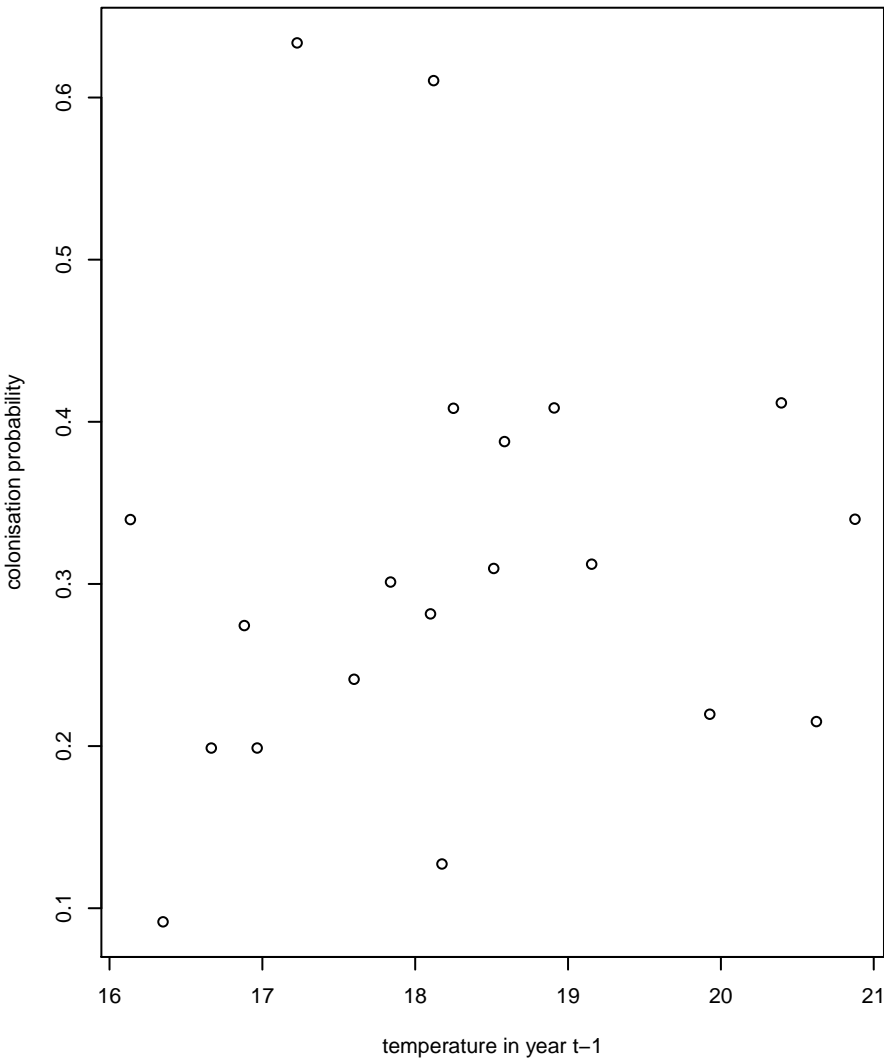

**Favonius quercus**

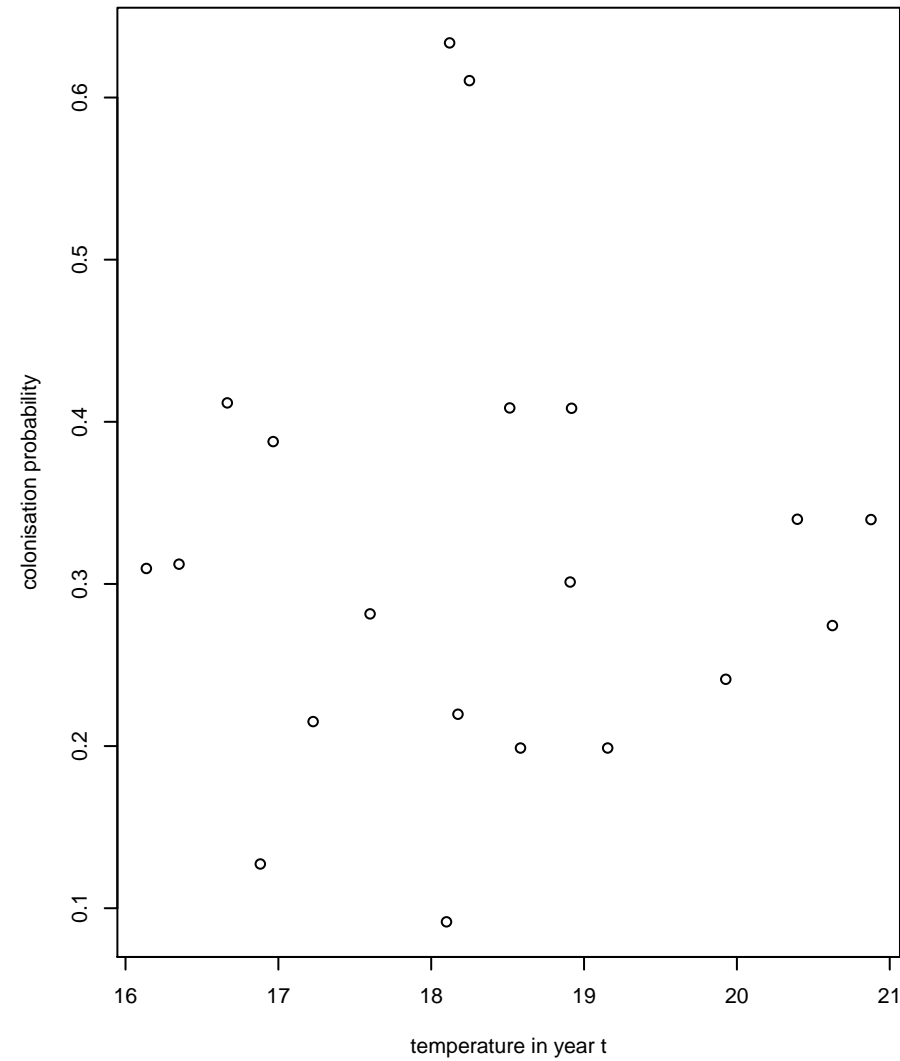

**Thymelicus lineola**

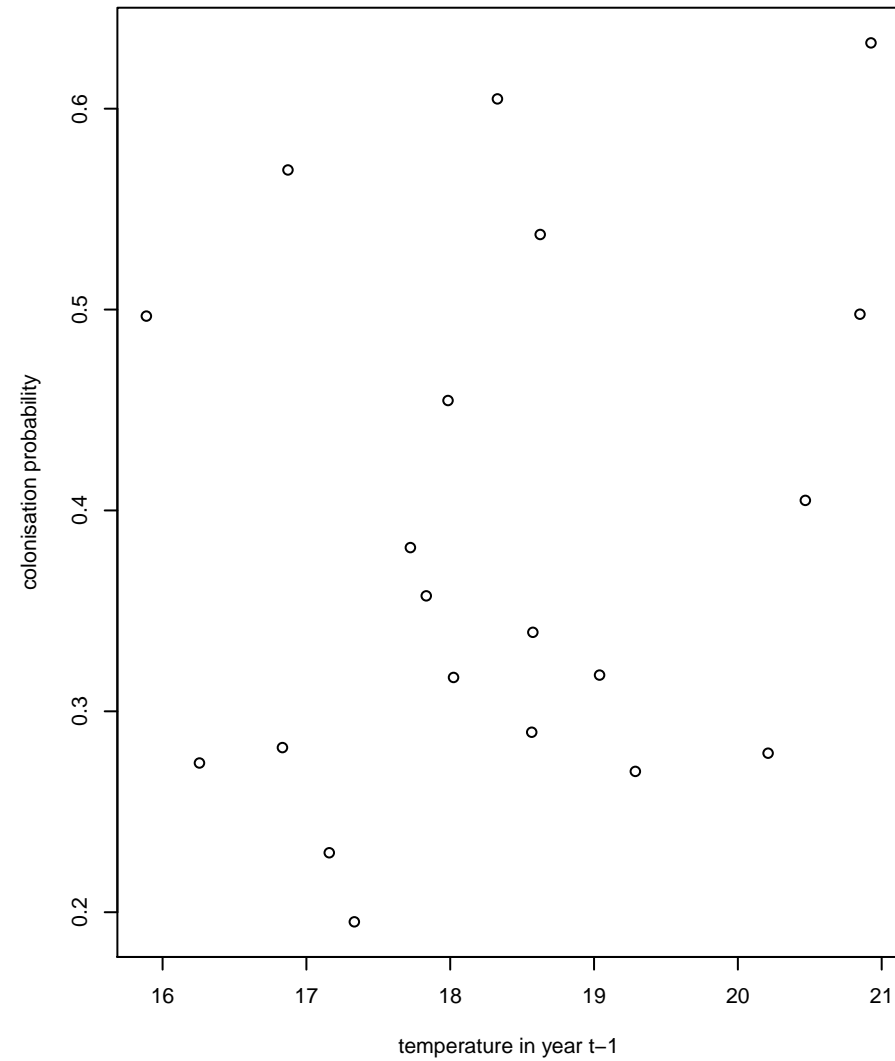

**Thymelicus lineola**

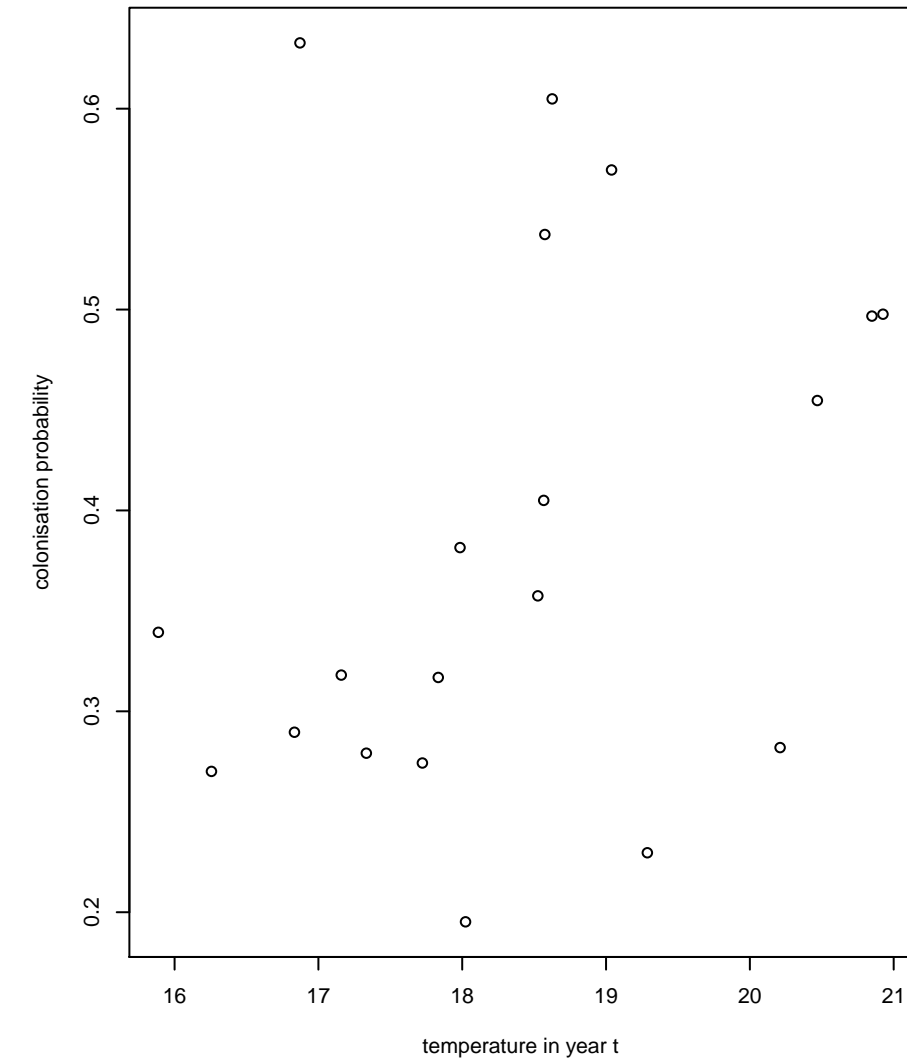

**Lycaena phlaeas**

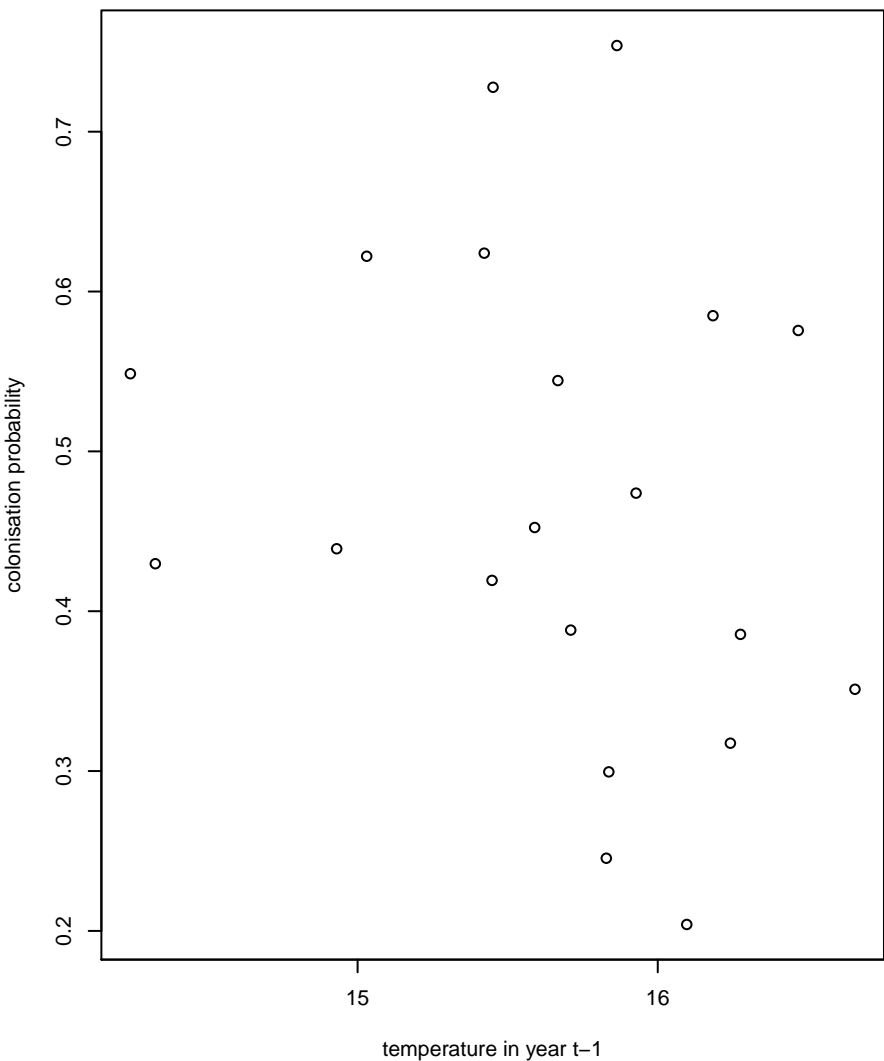

**Lycaena phlaeas**

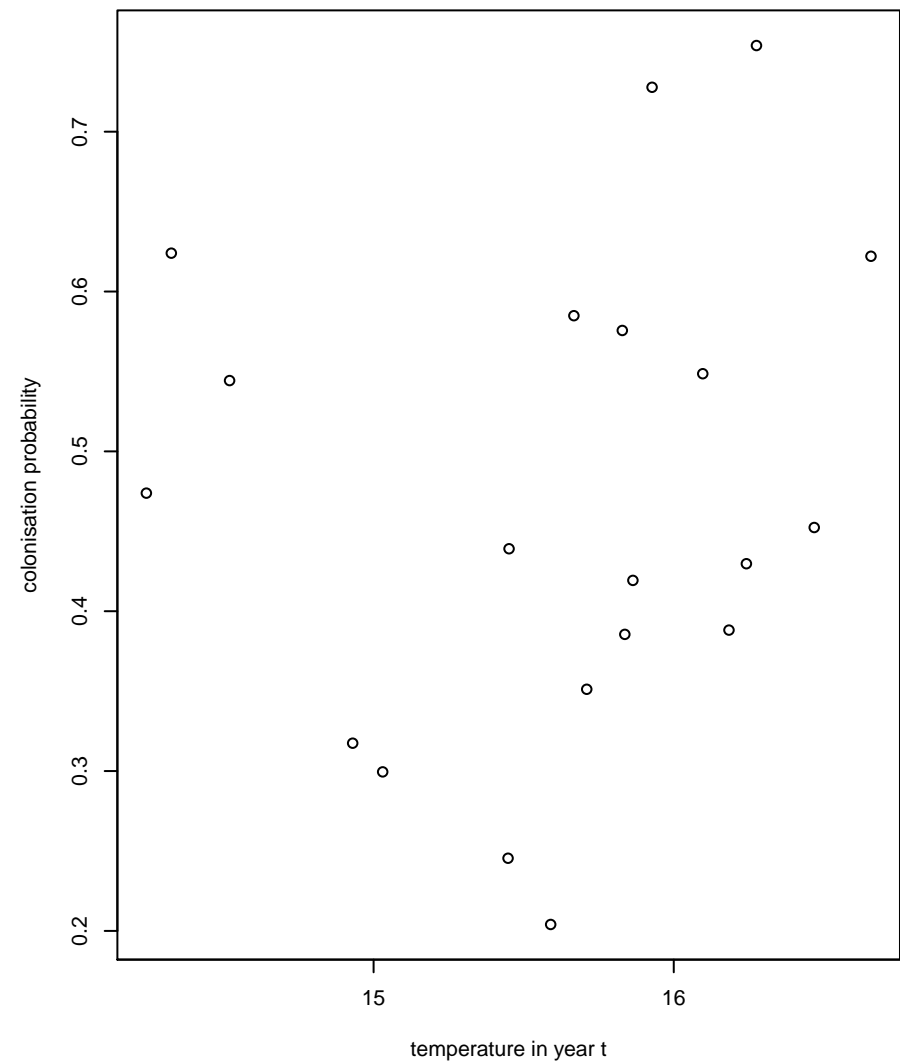

**Lycaena tityrus**

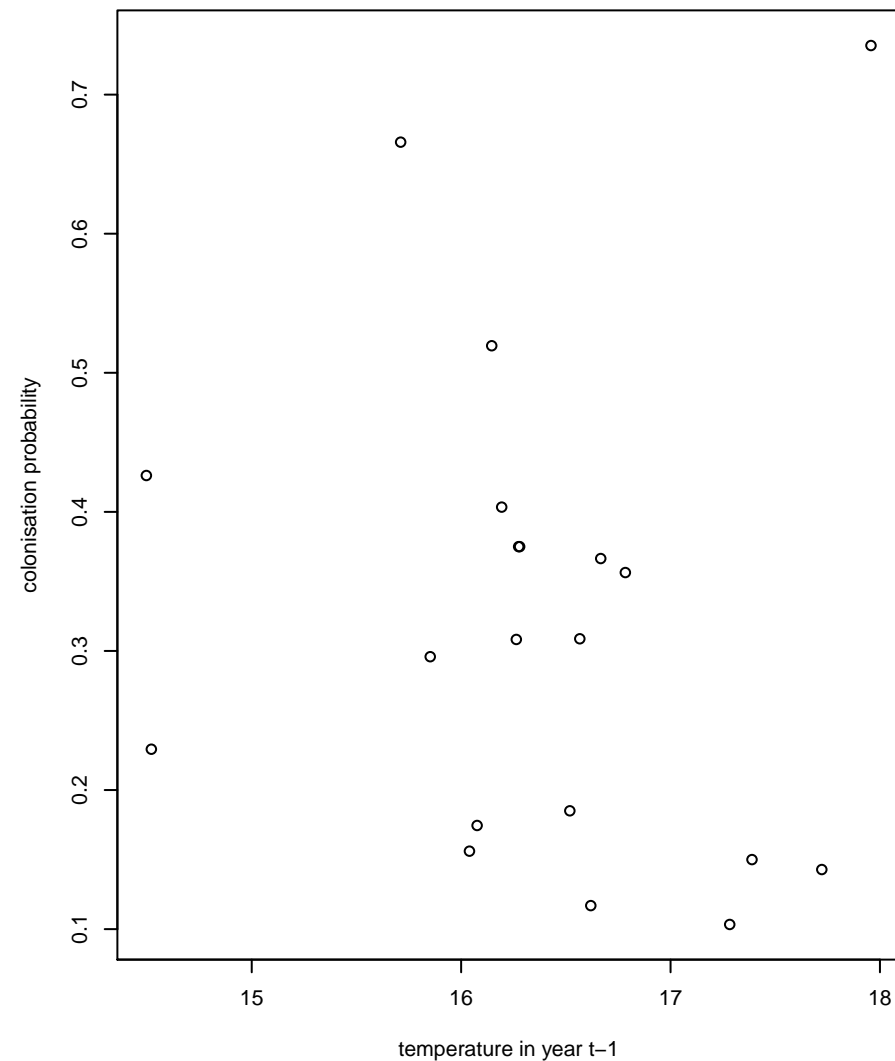

**Lycaena tityrus**

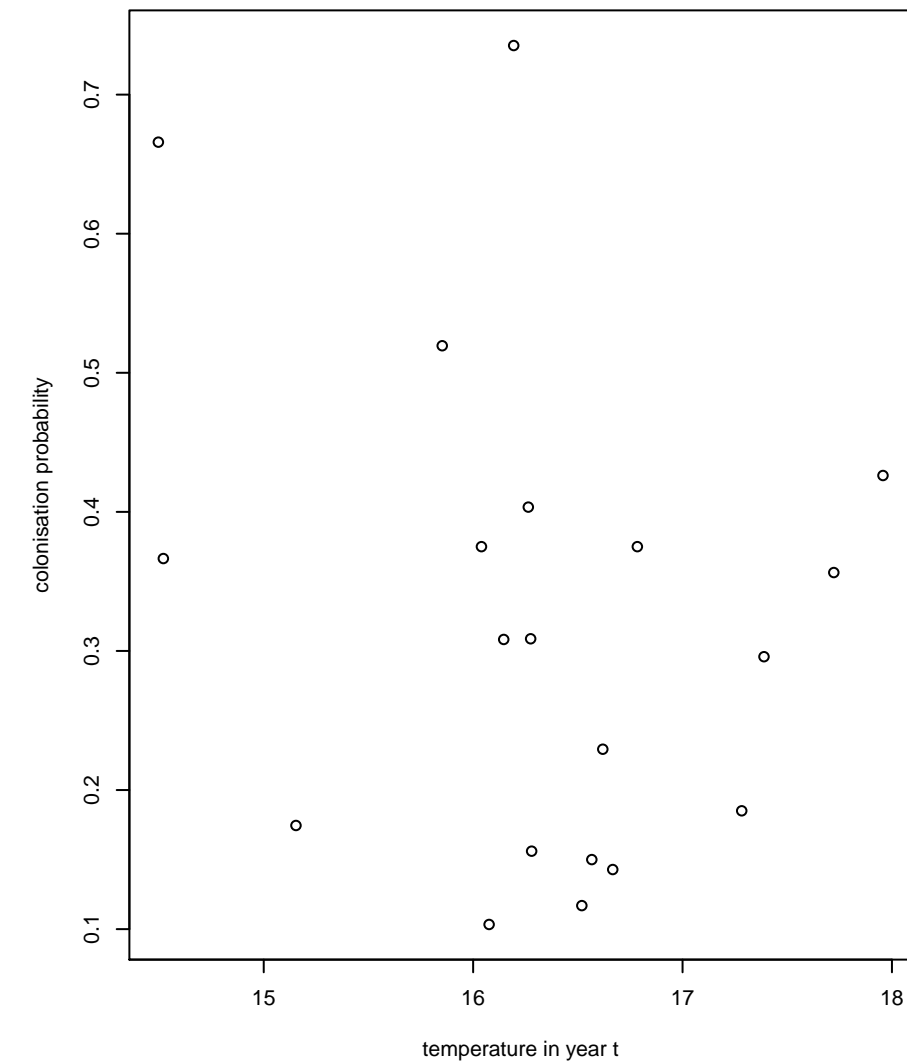

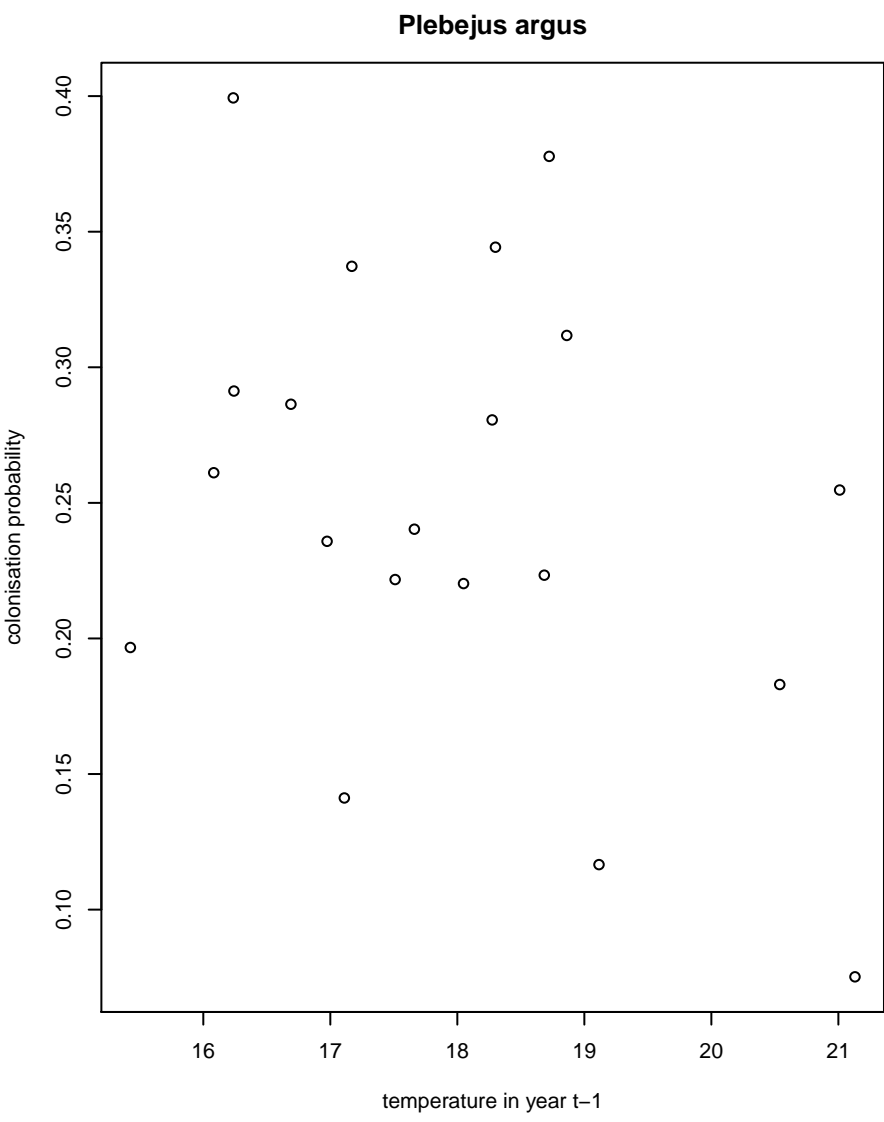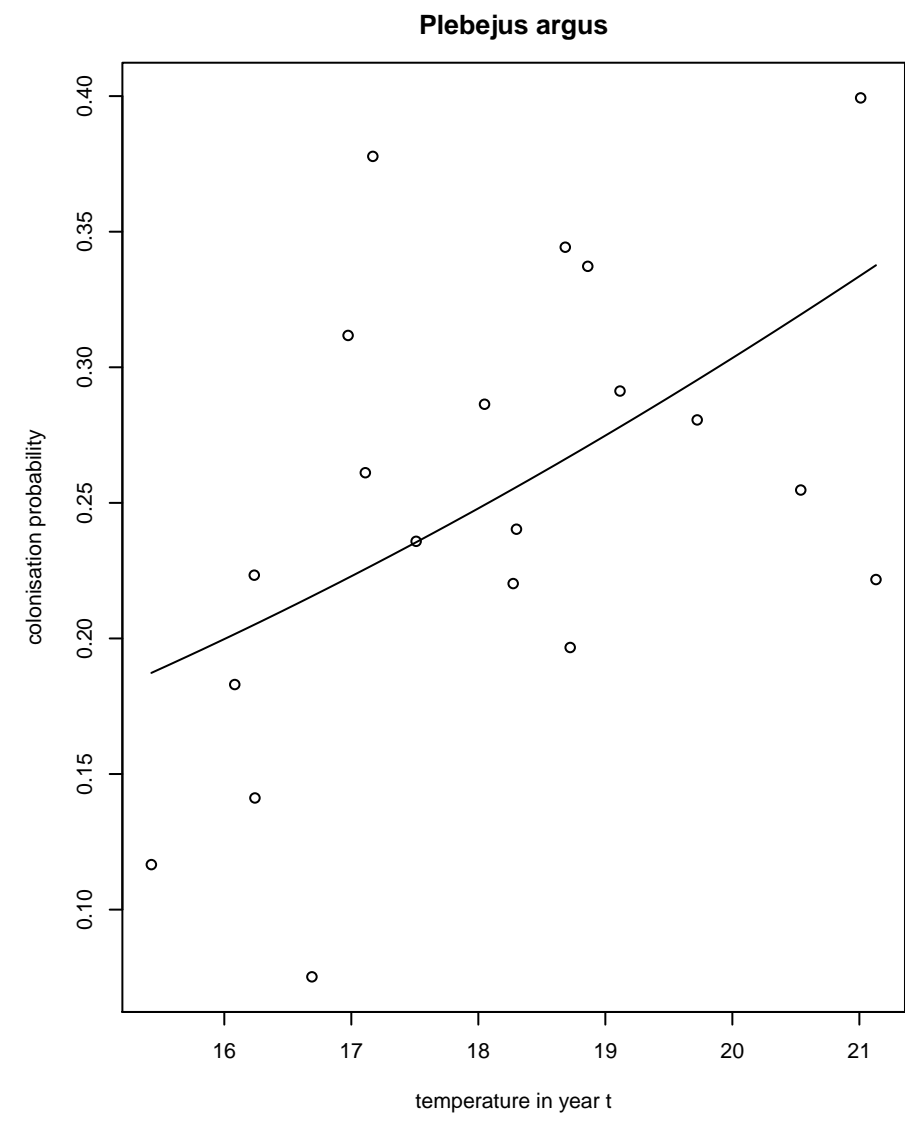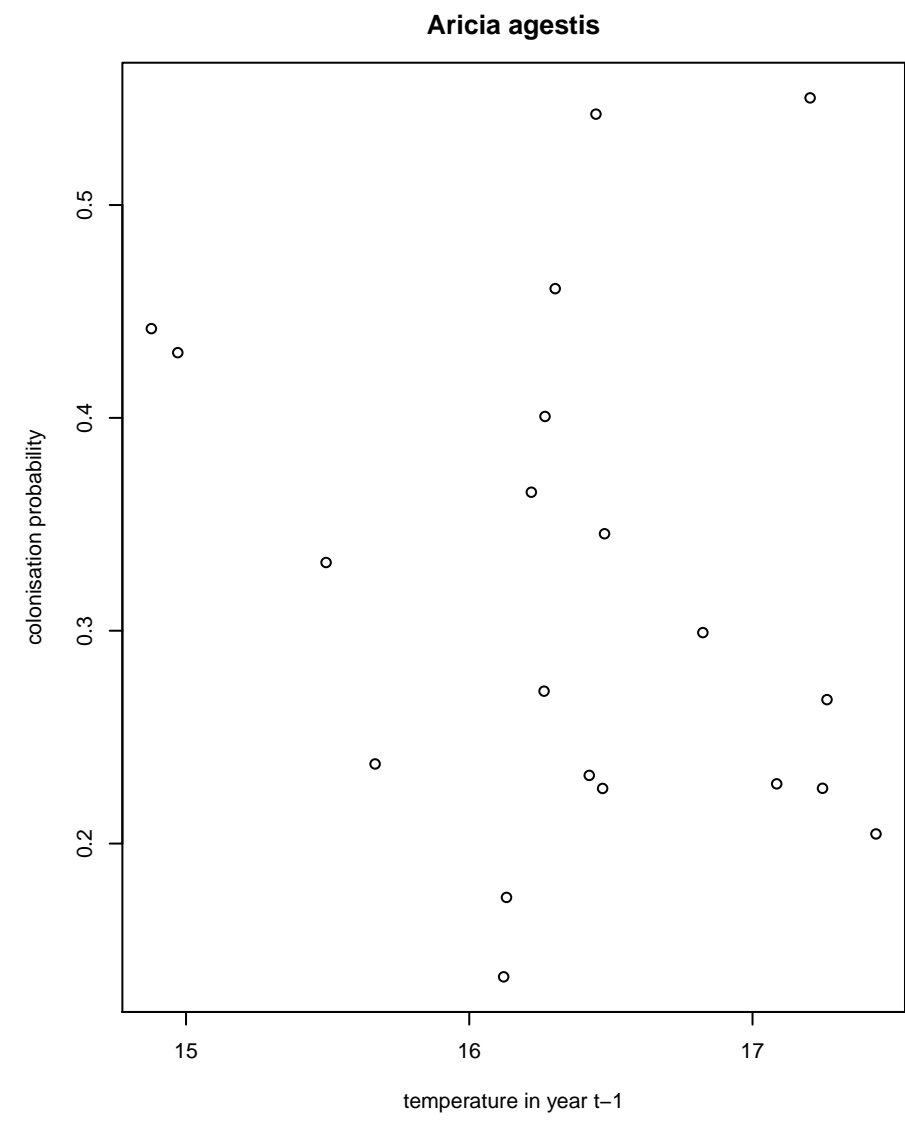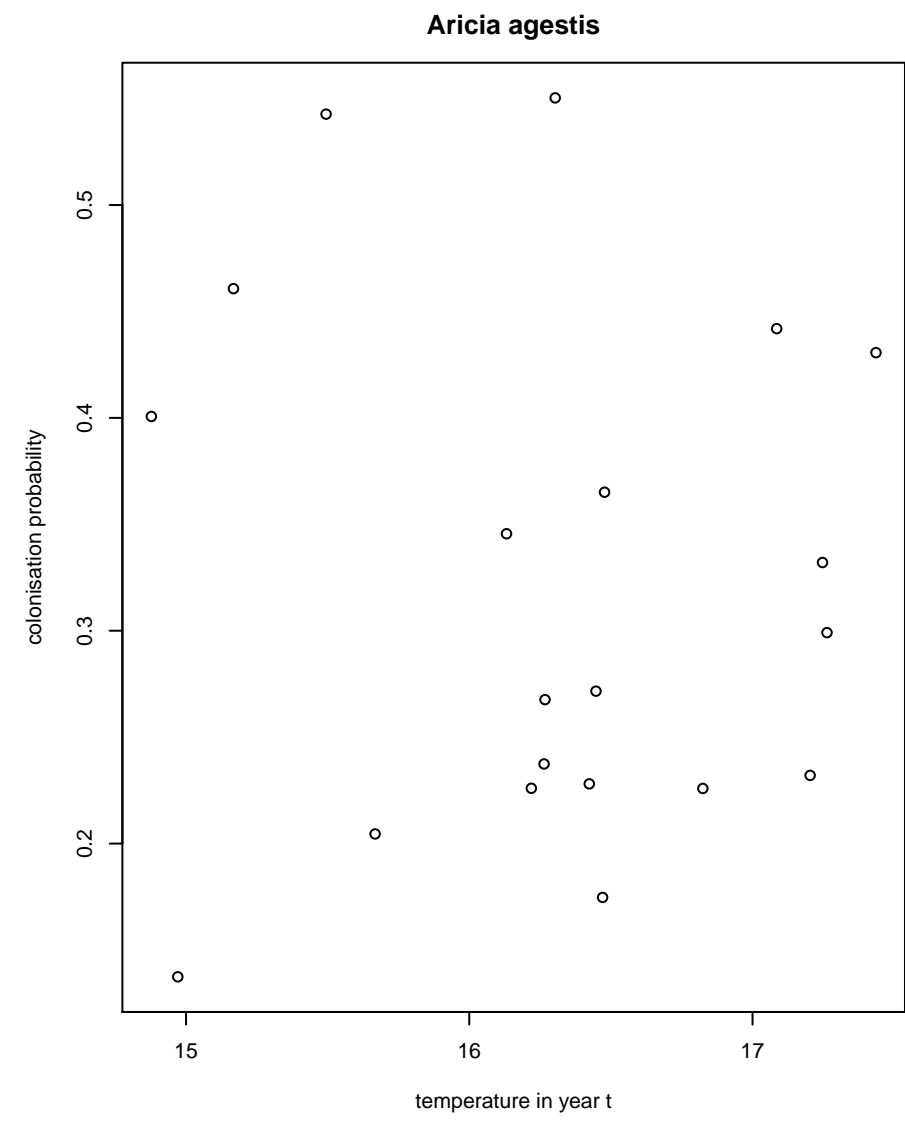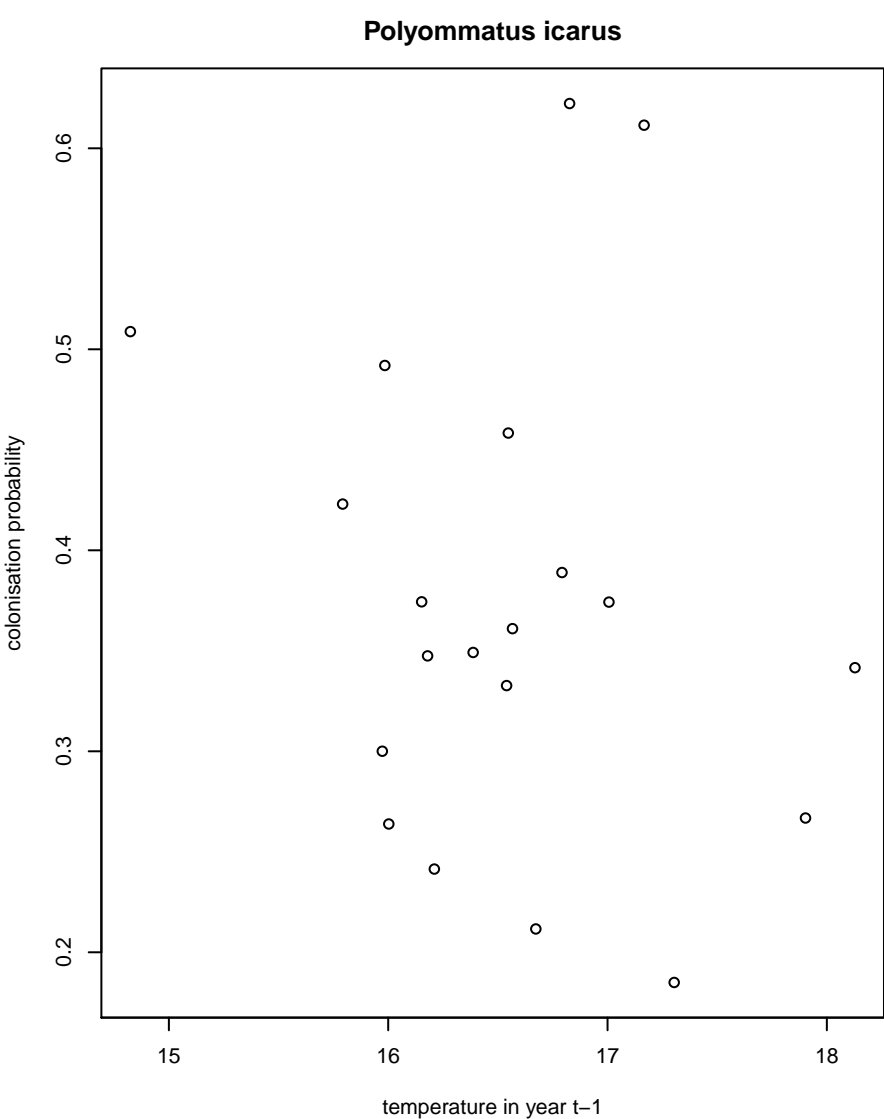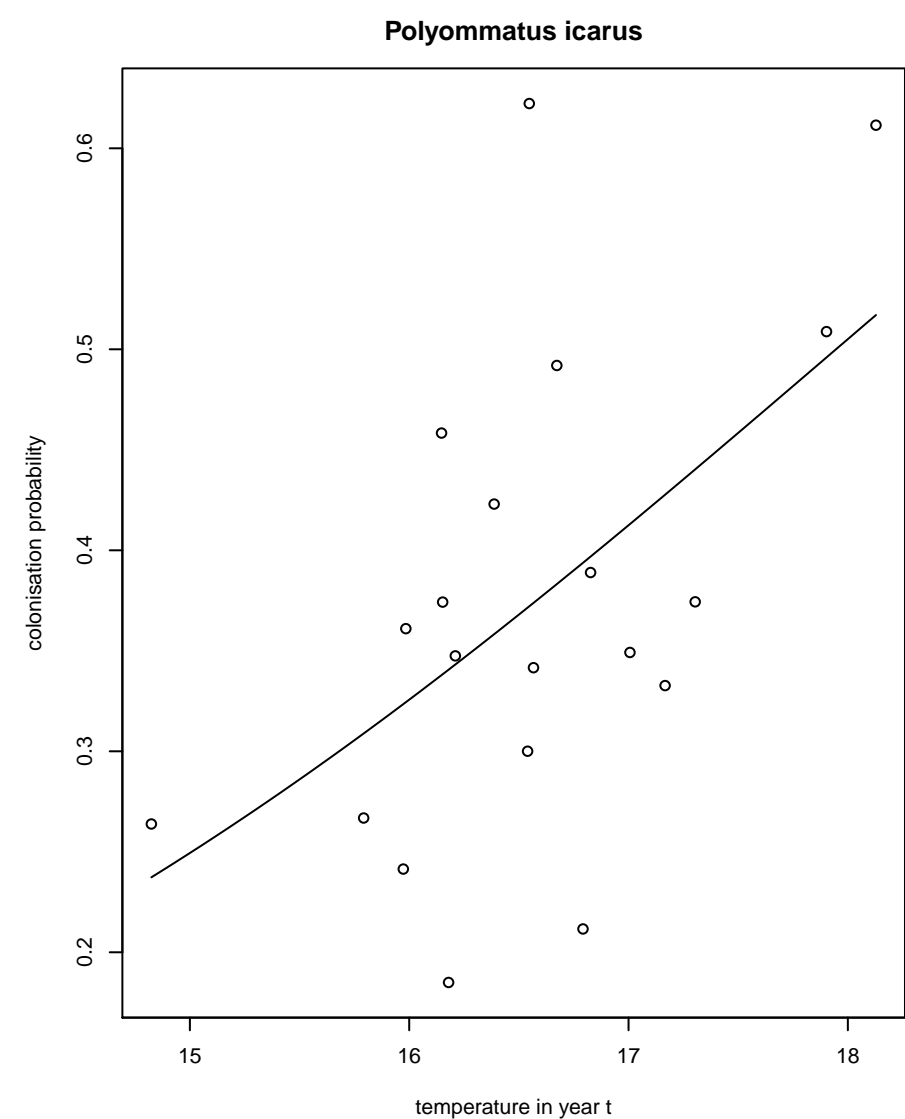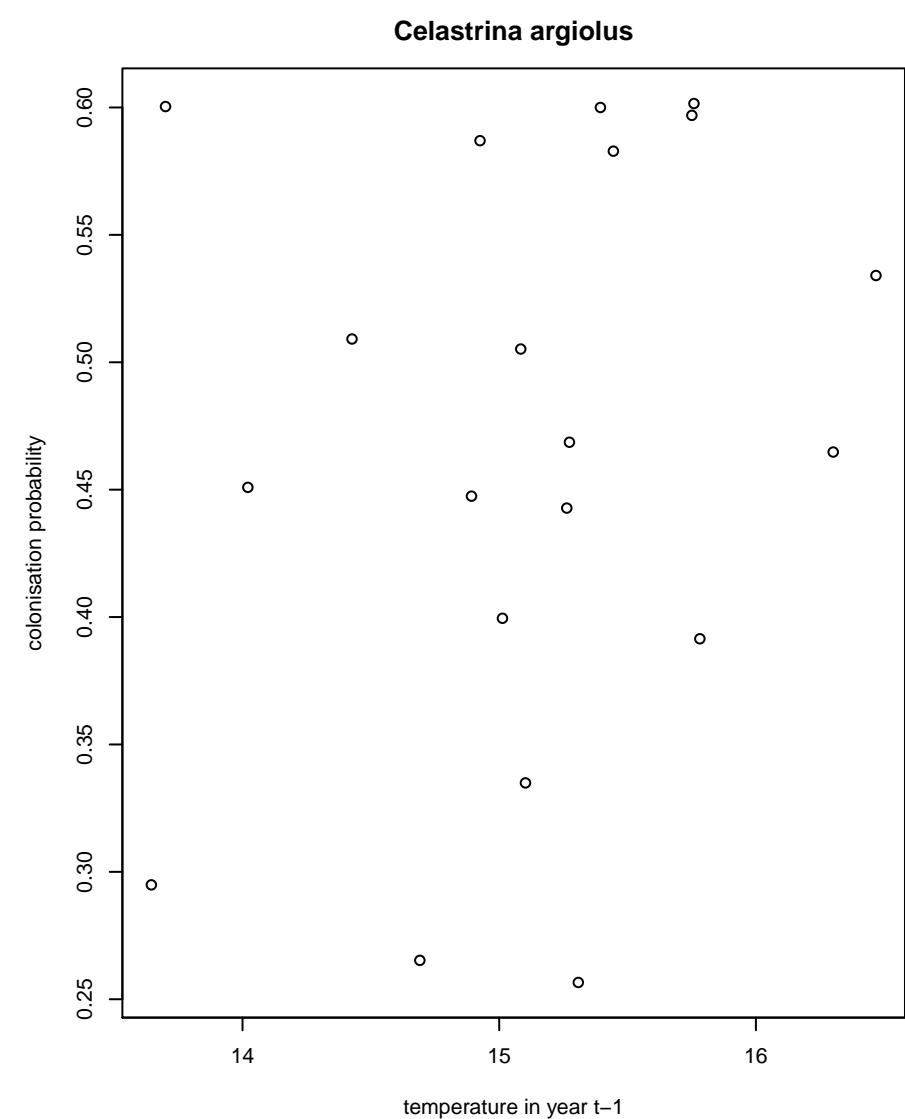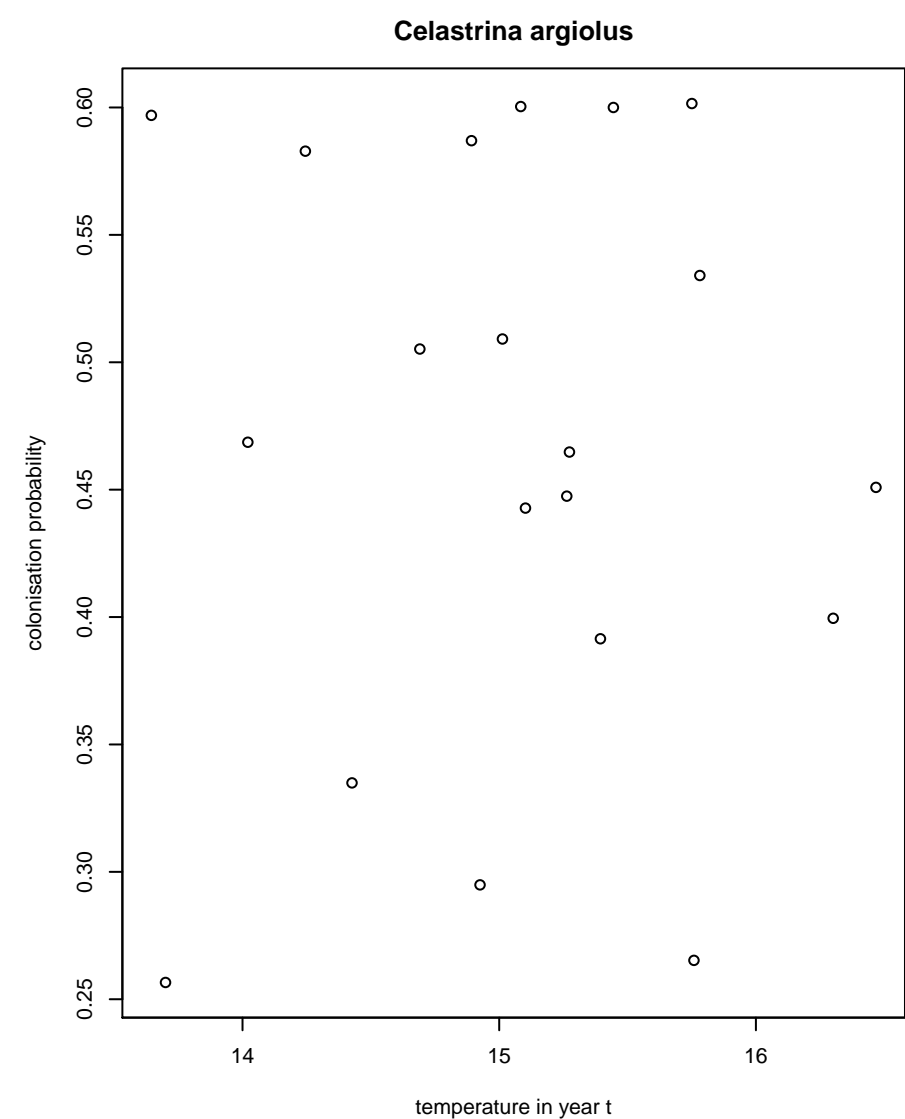

**Hesperia comma**

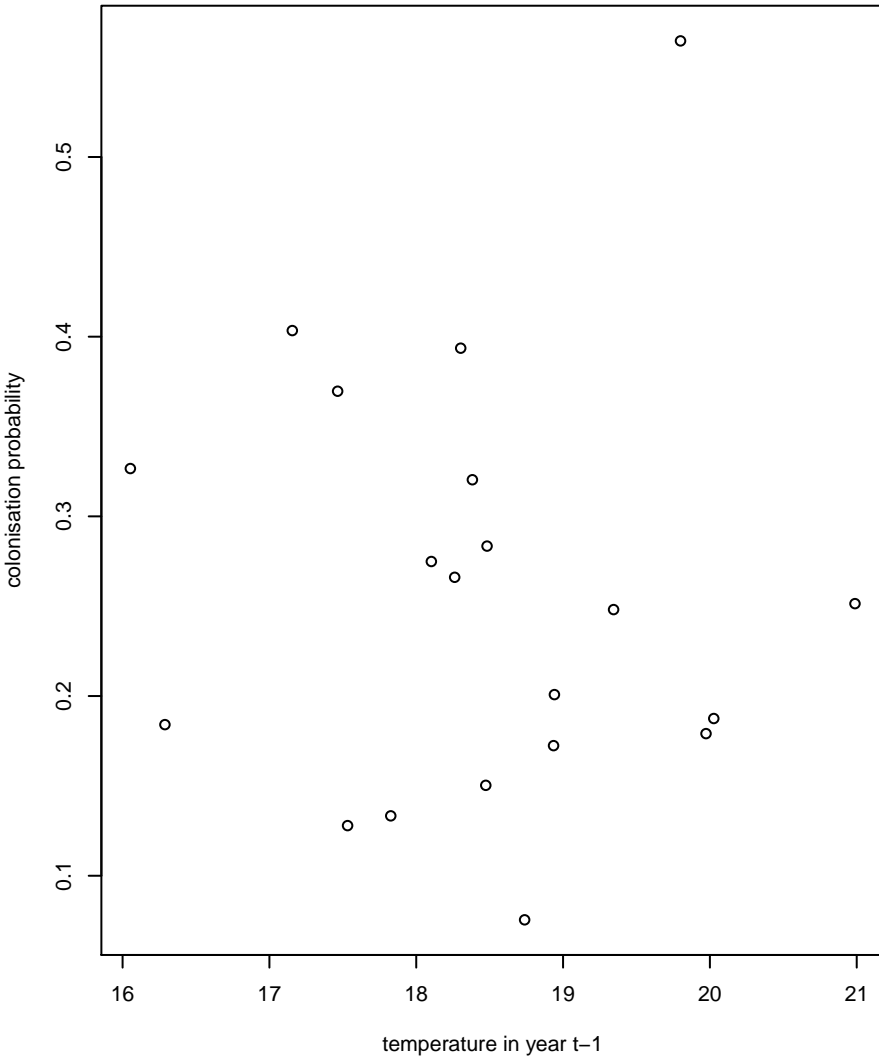

**Hesperia comma**

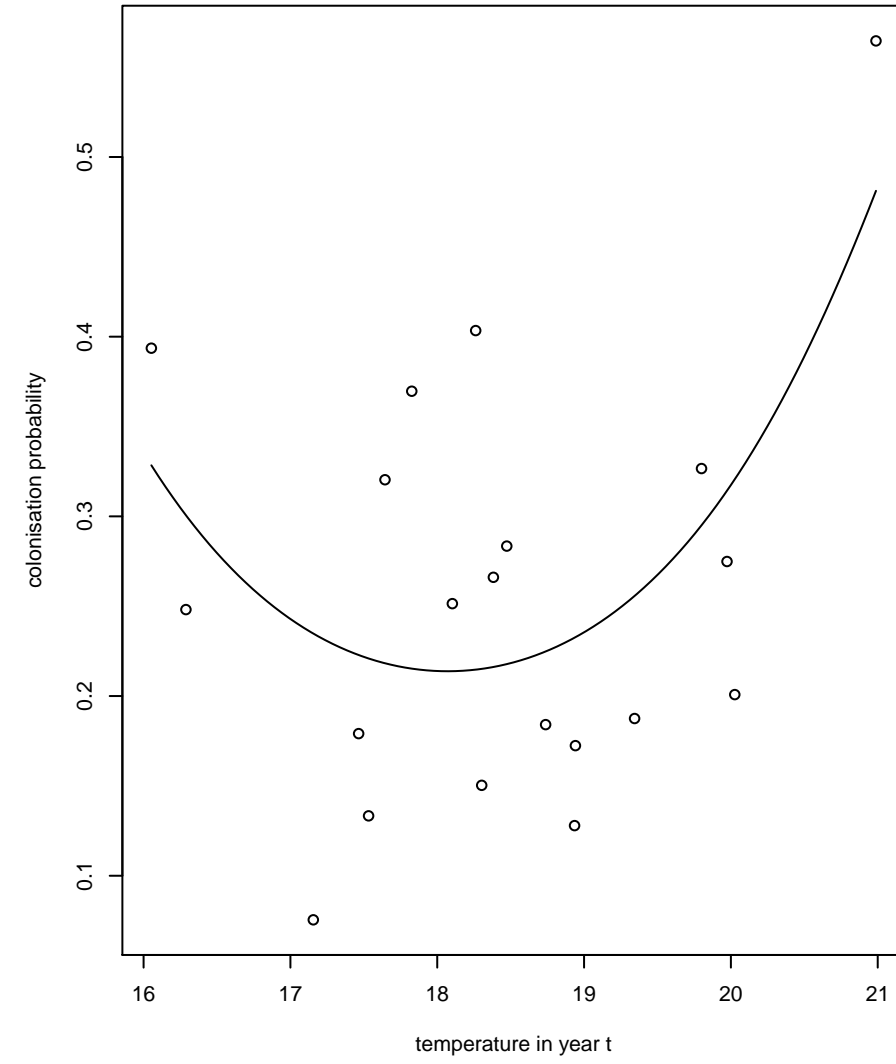

**Limenitis camilla**

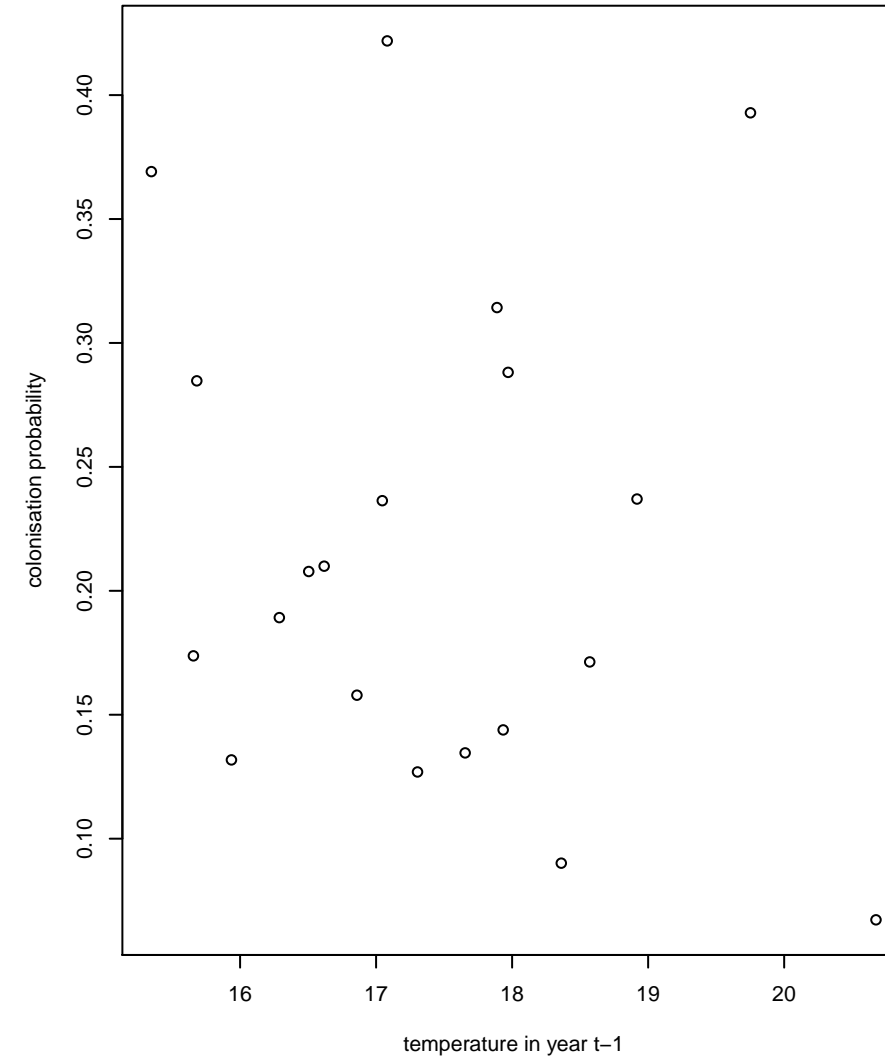

**Limenitis camilla**

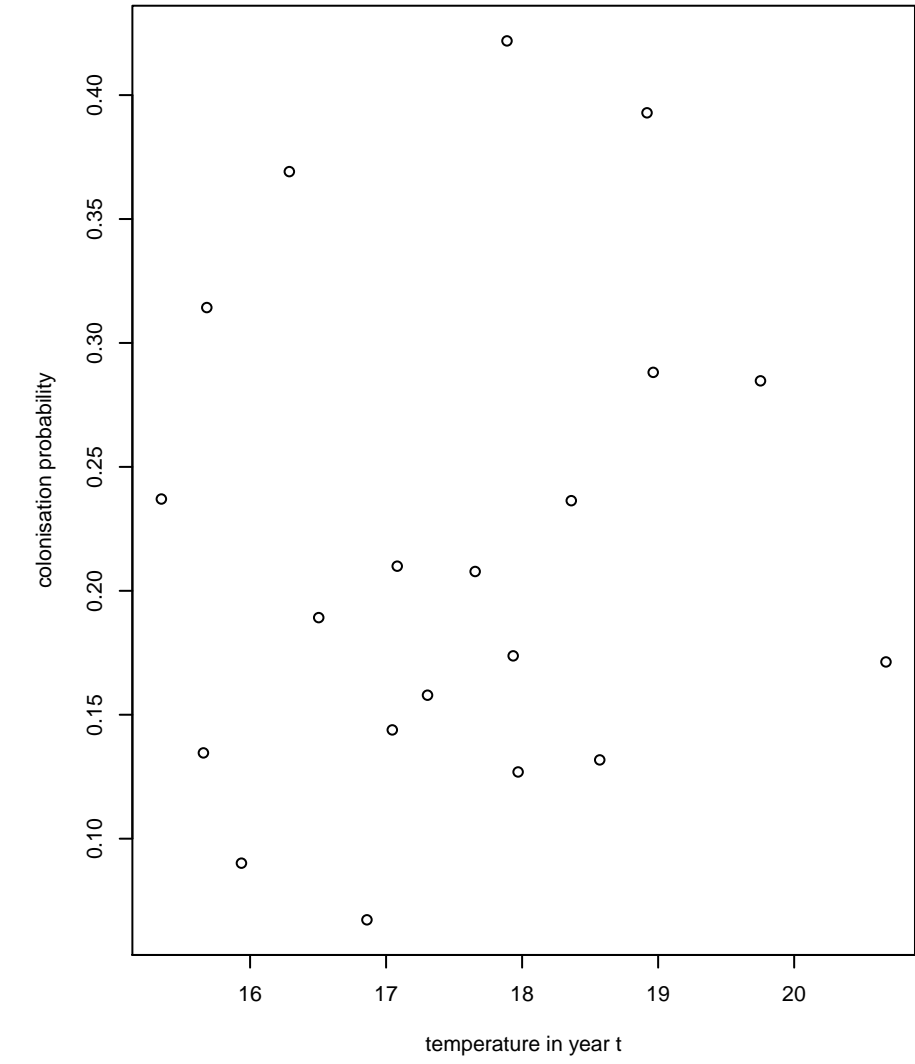

**Ochlodes sylvanus**

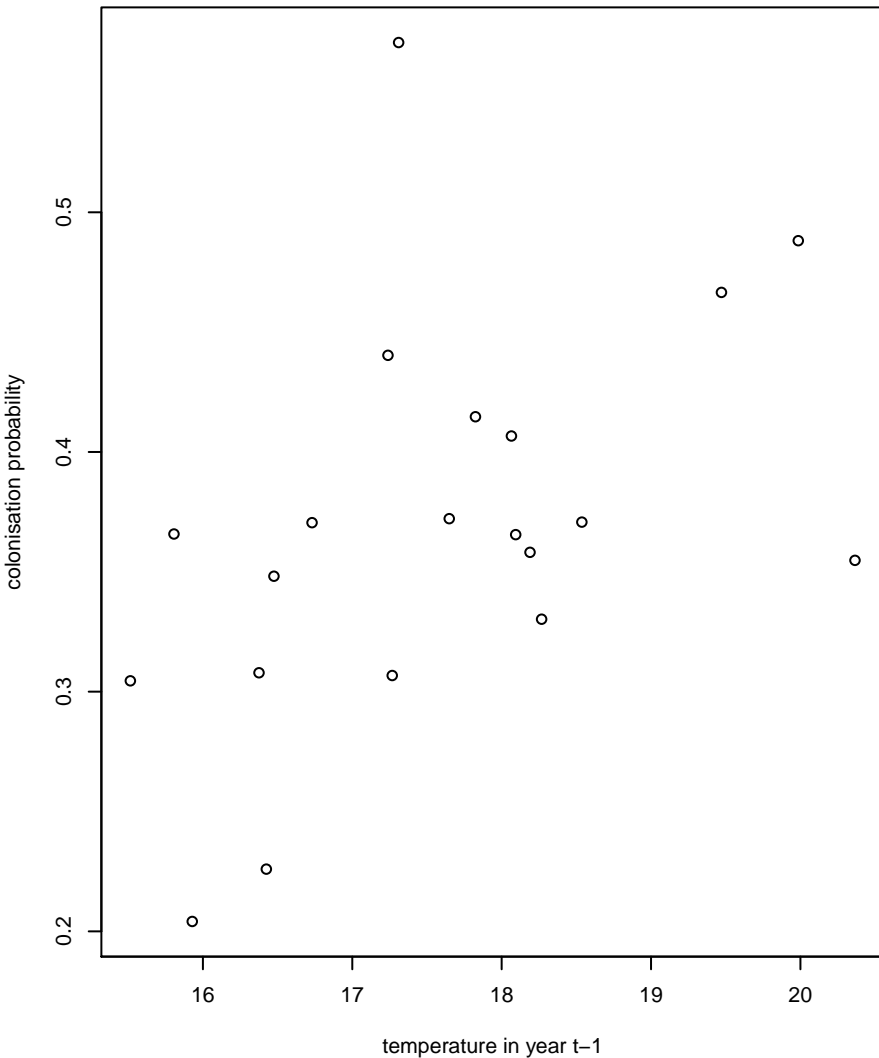

**Ochlodes sylvanus**

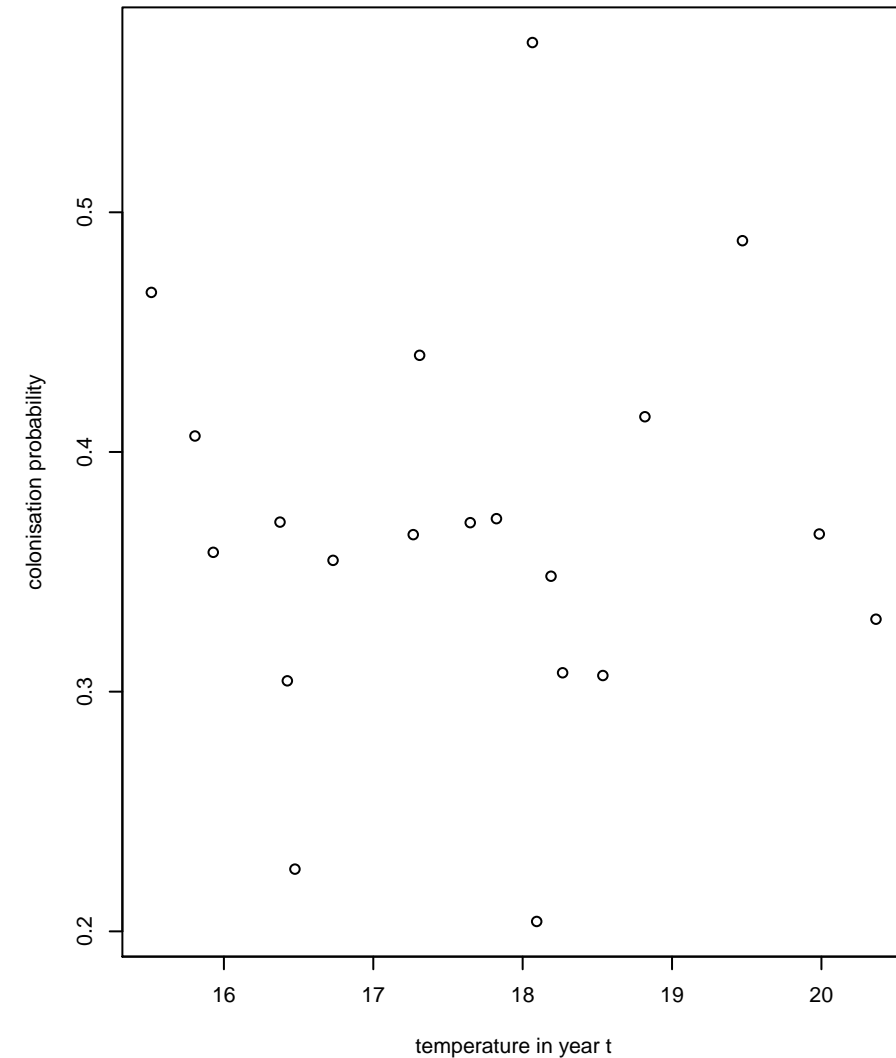

**Aglais urticae**

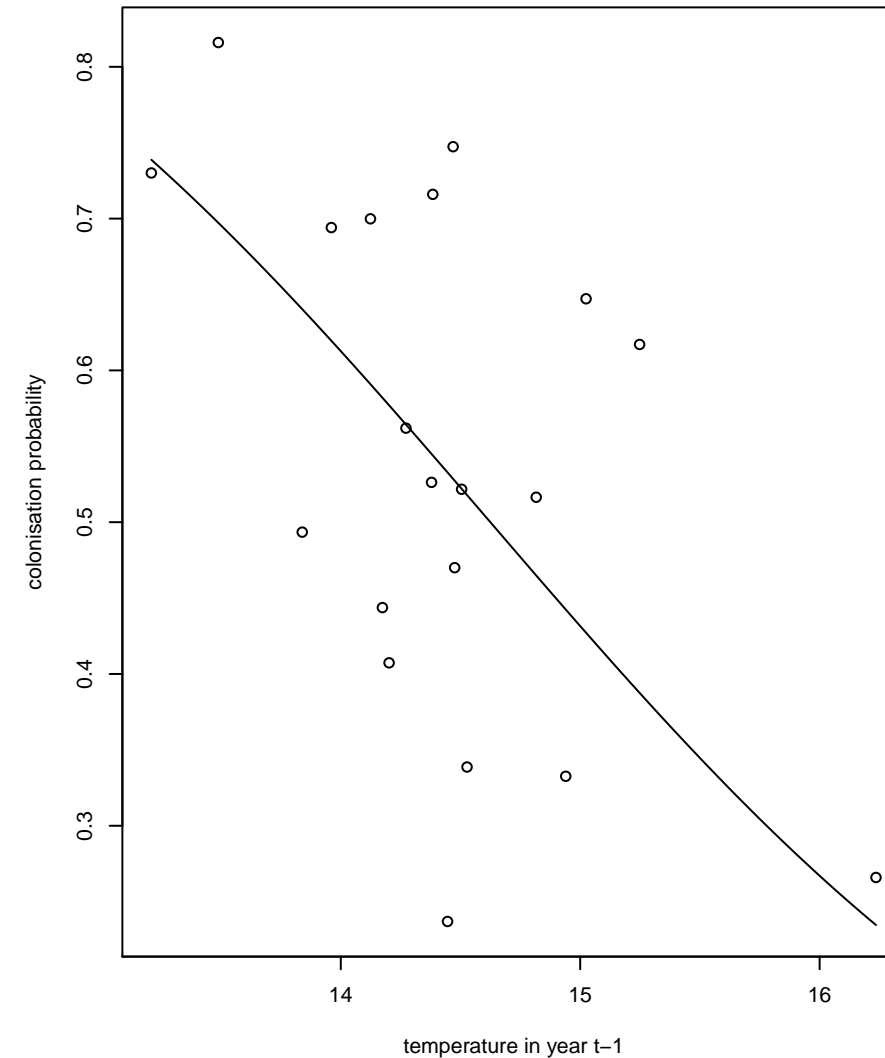

**Aglais urticae**

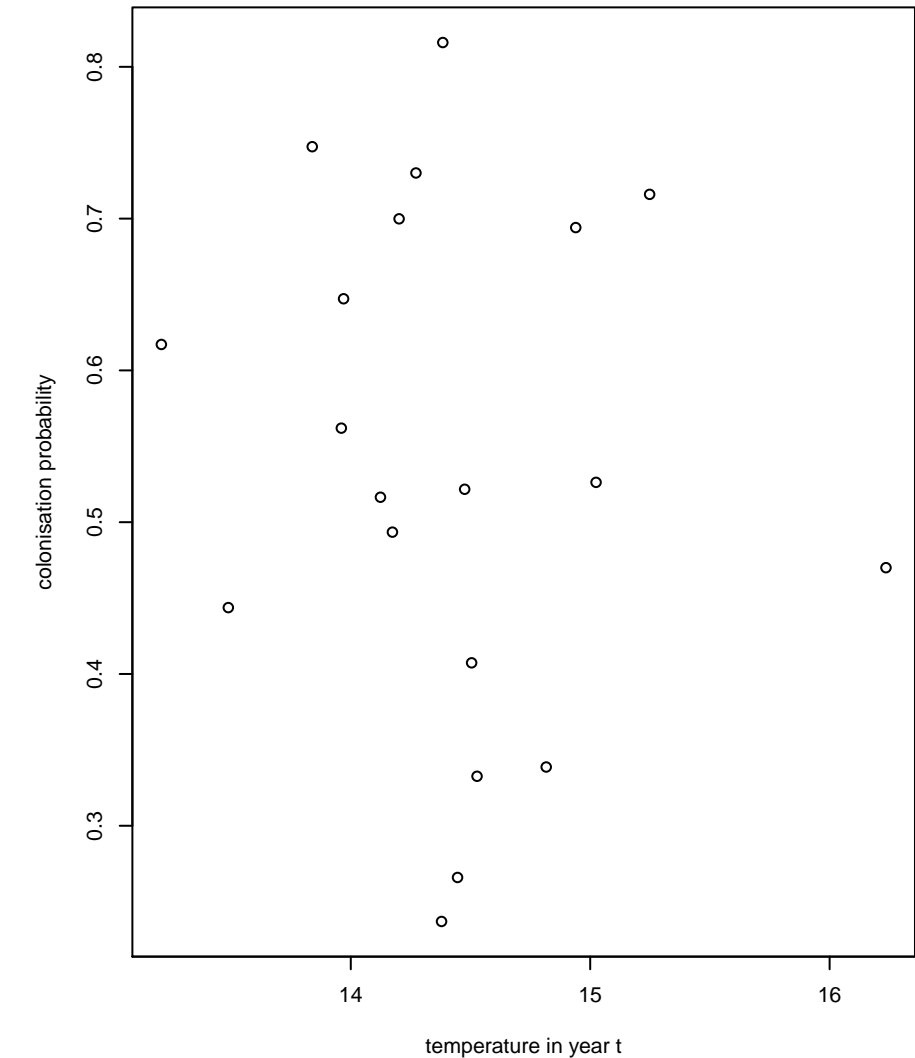

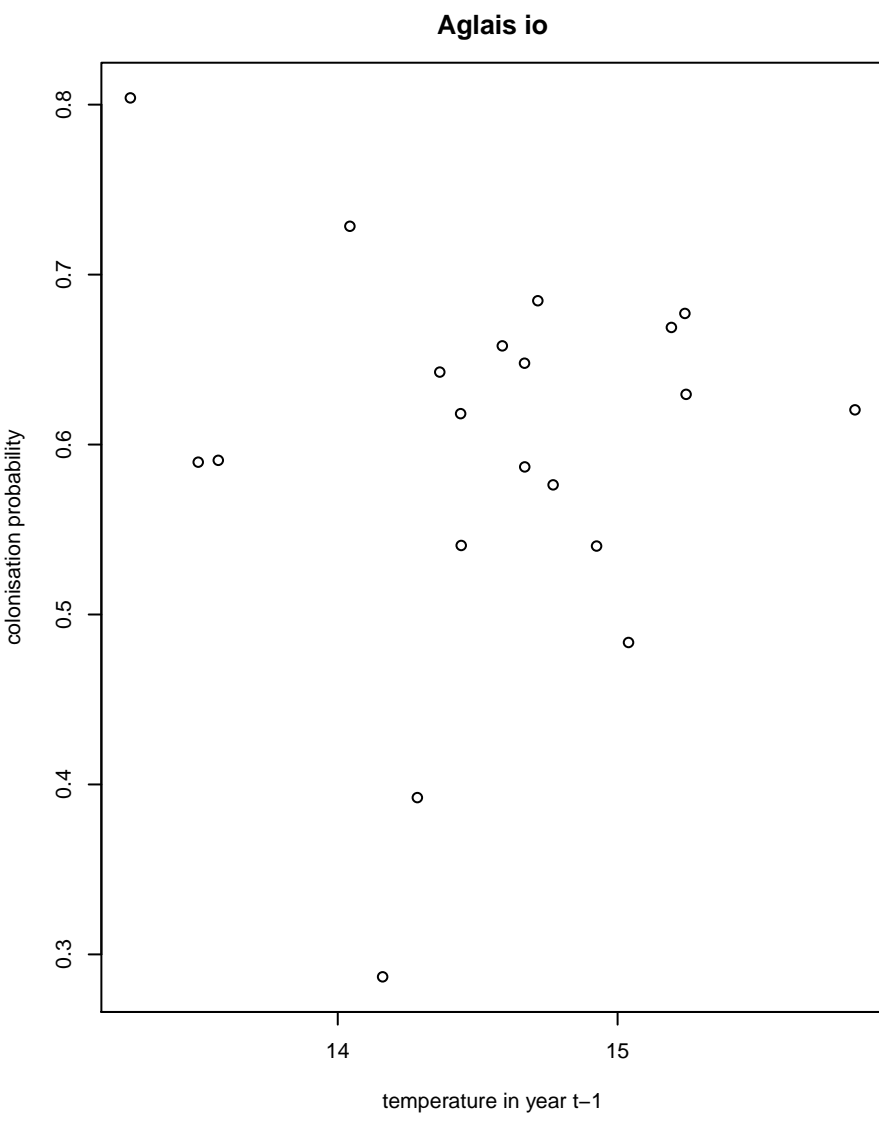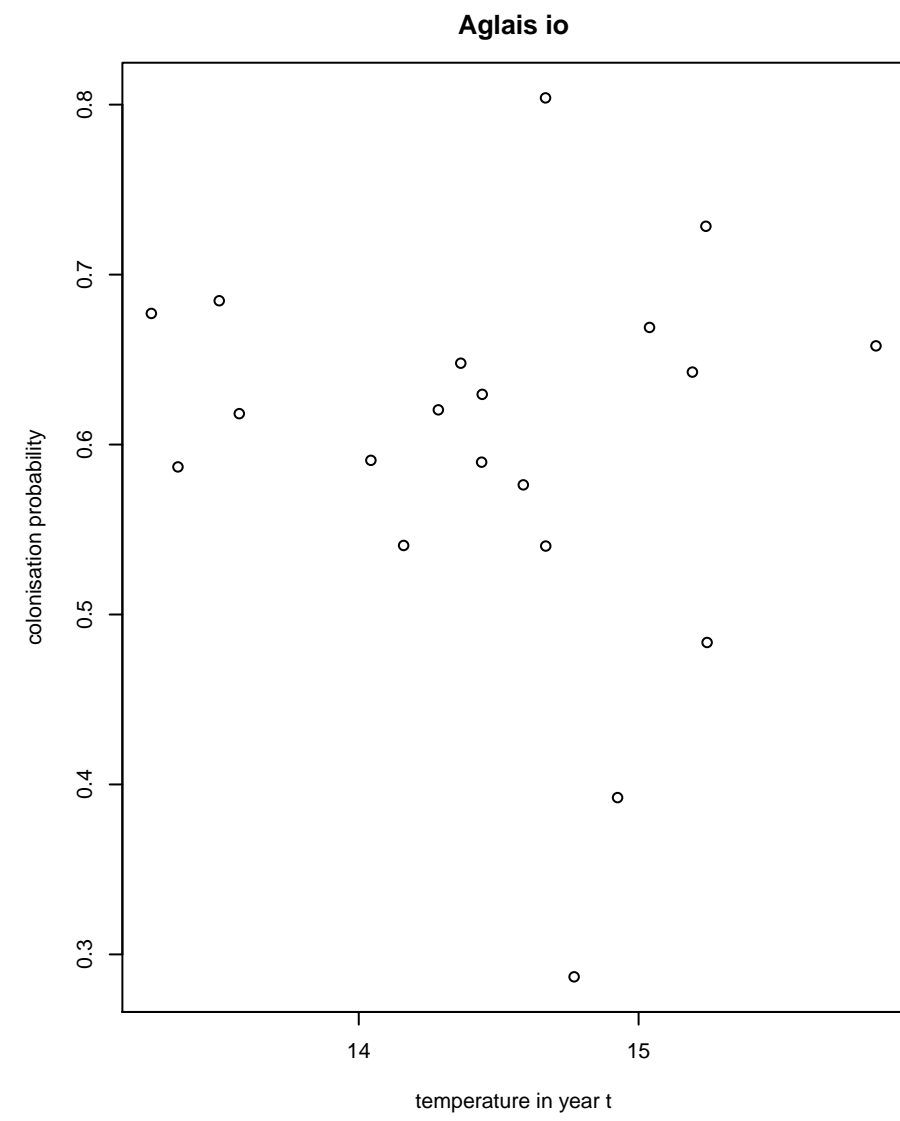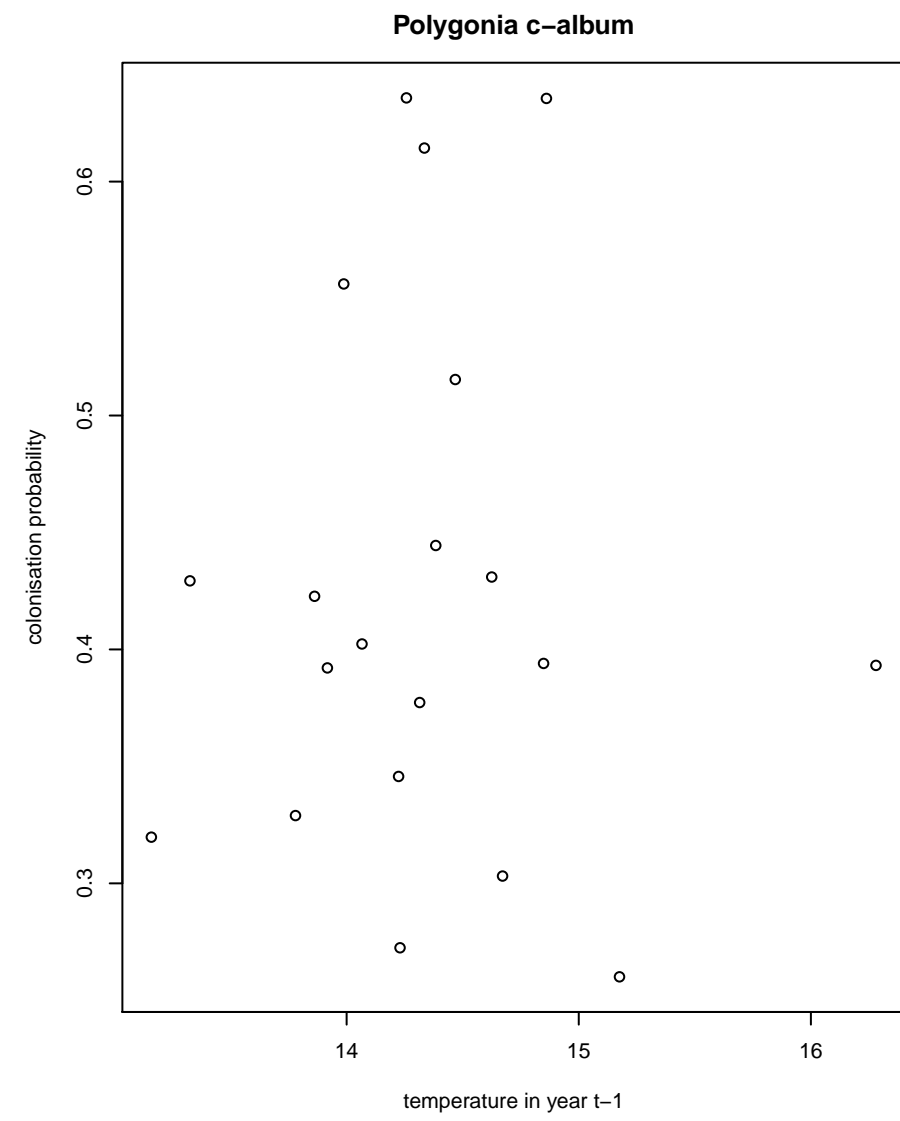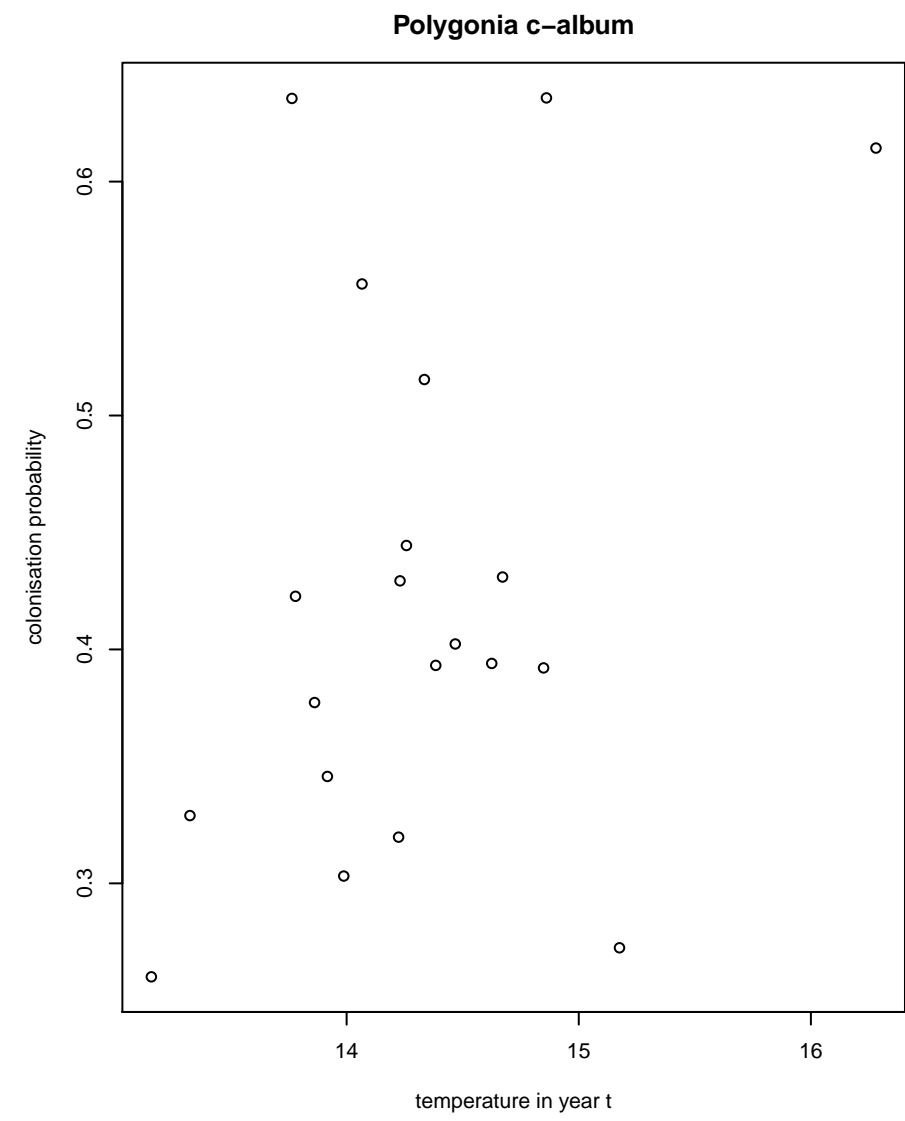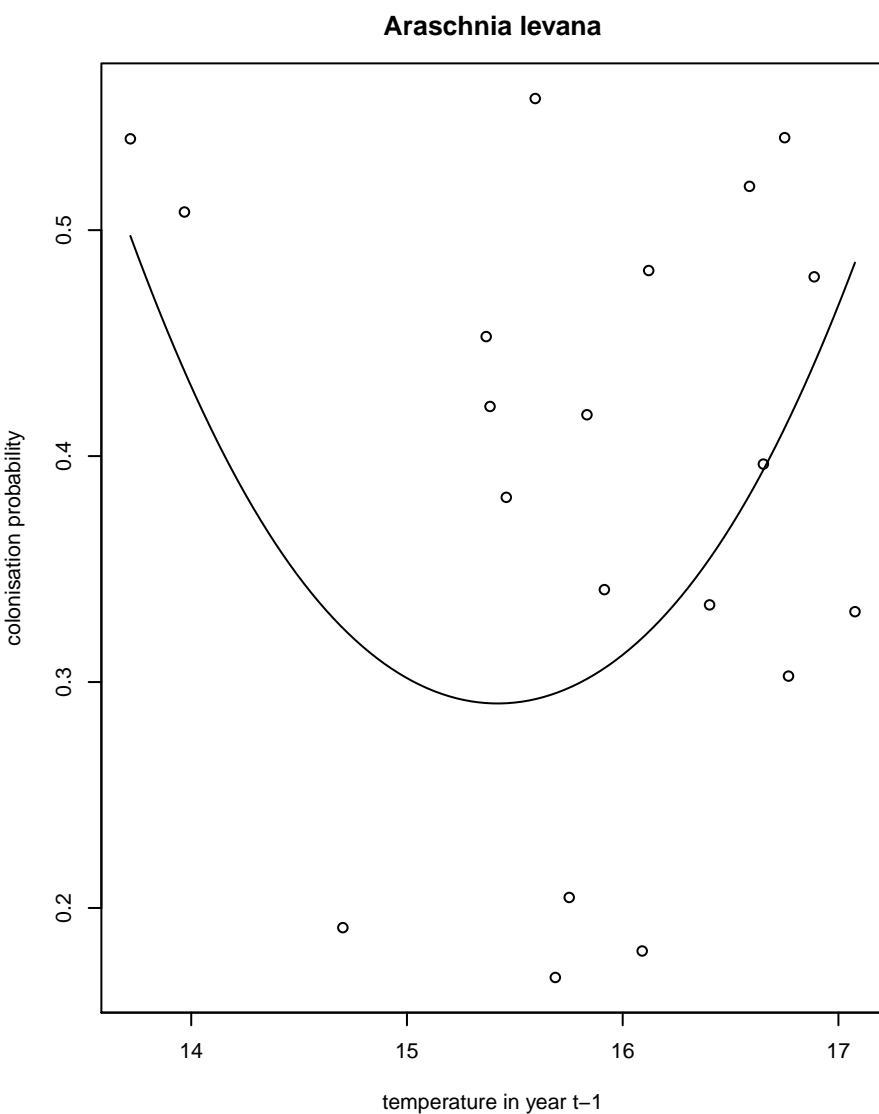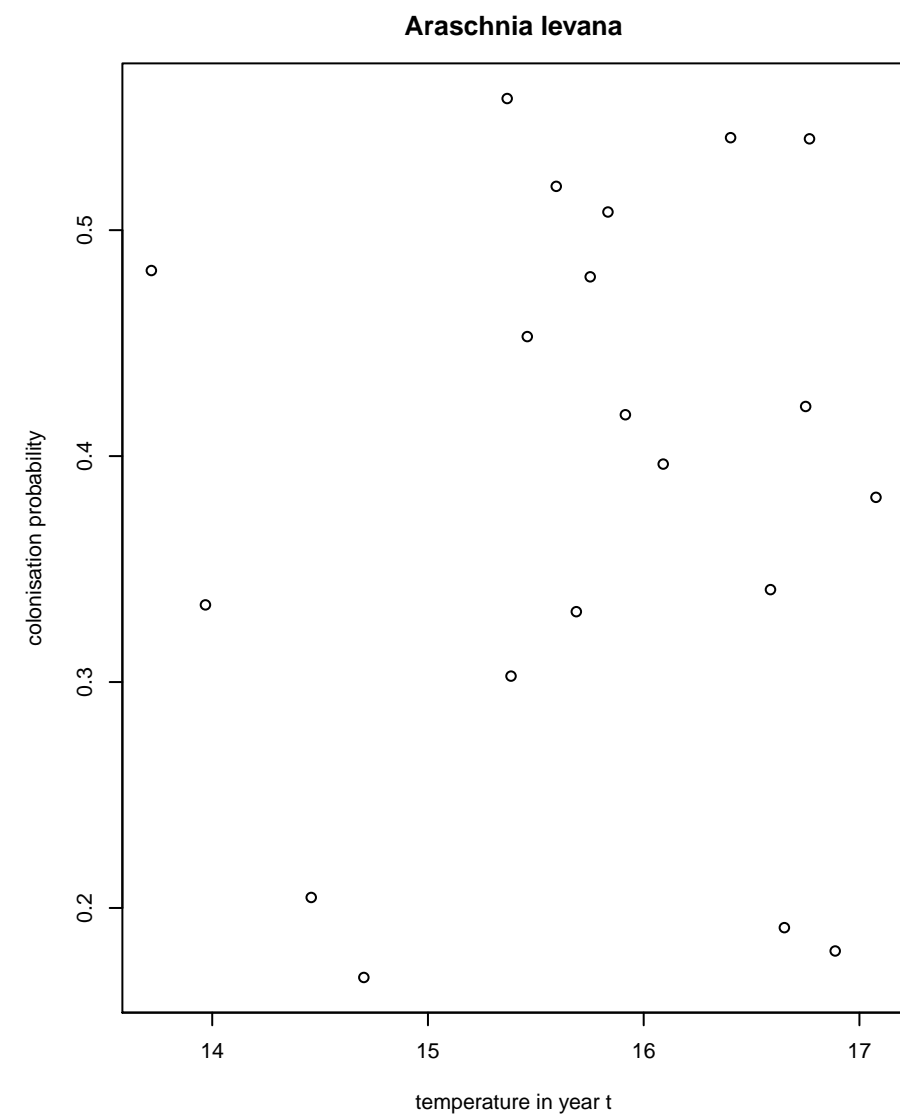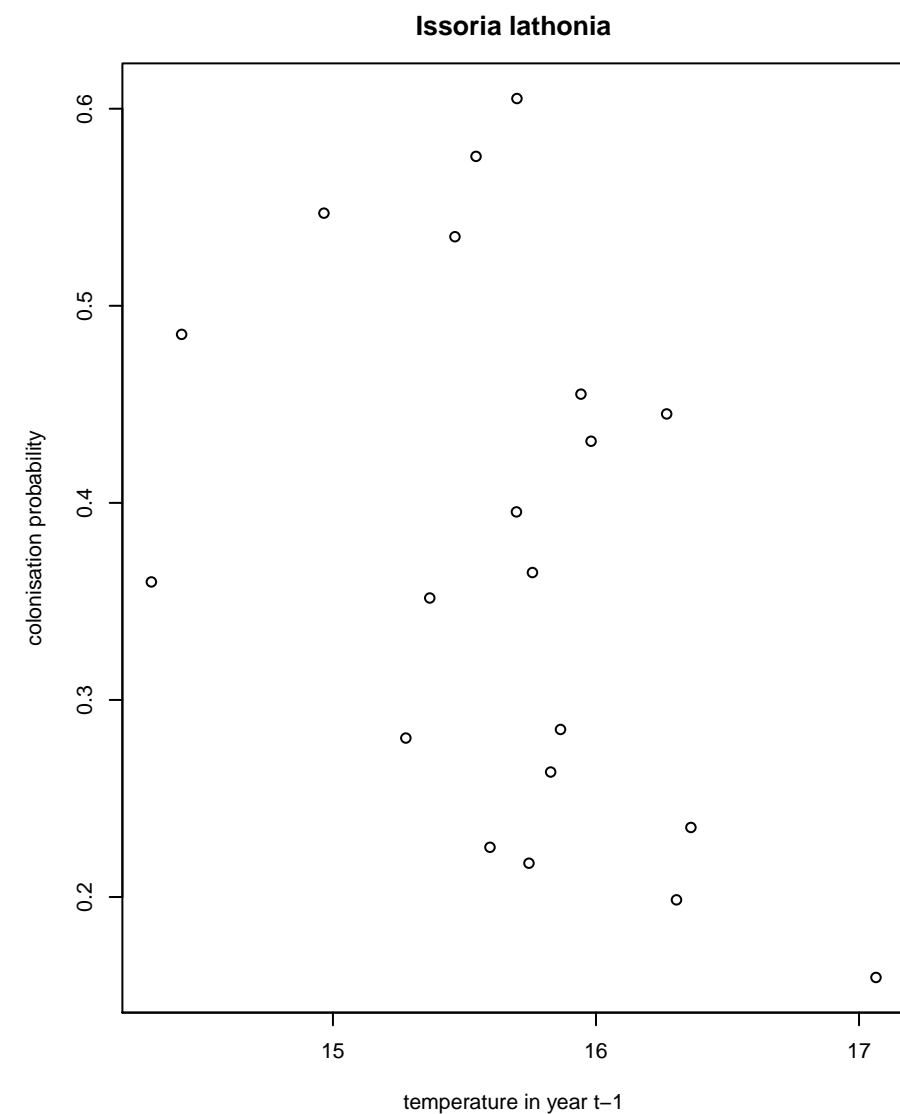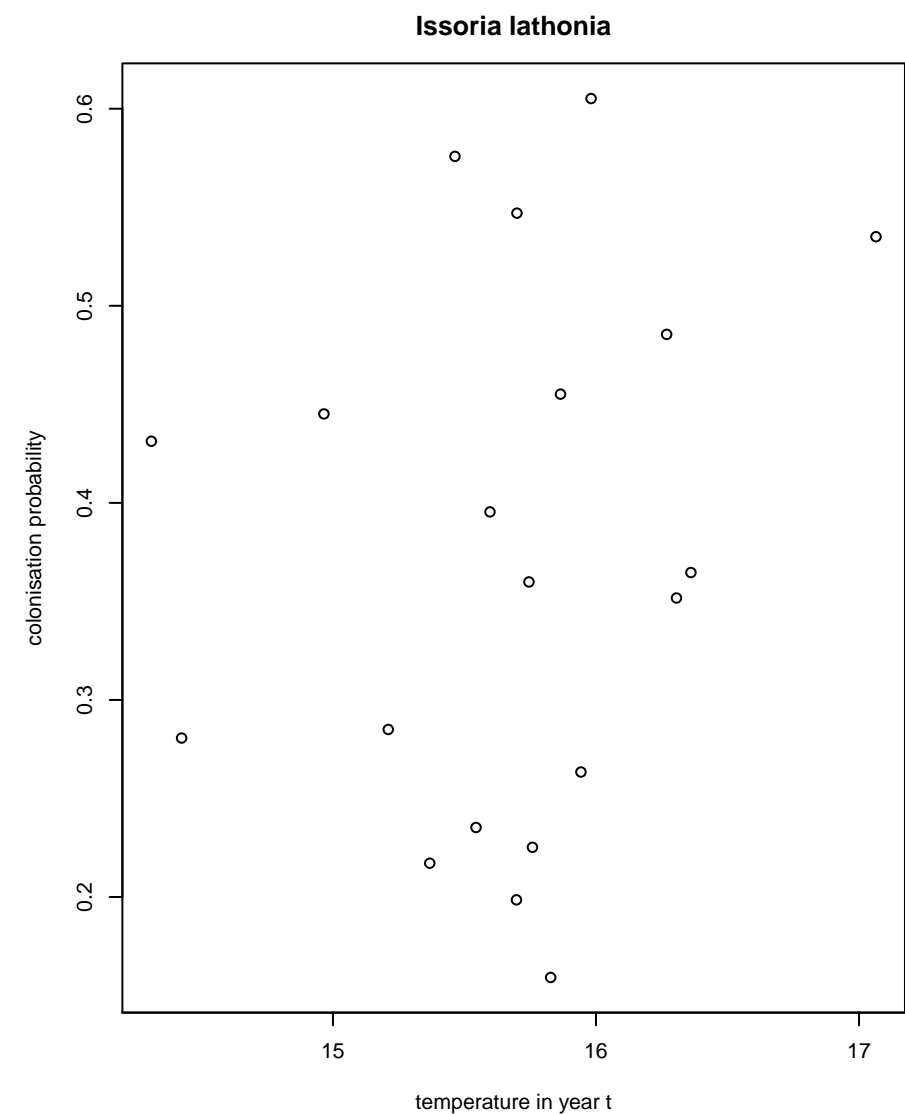

**Argynnis niobe**

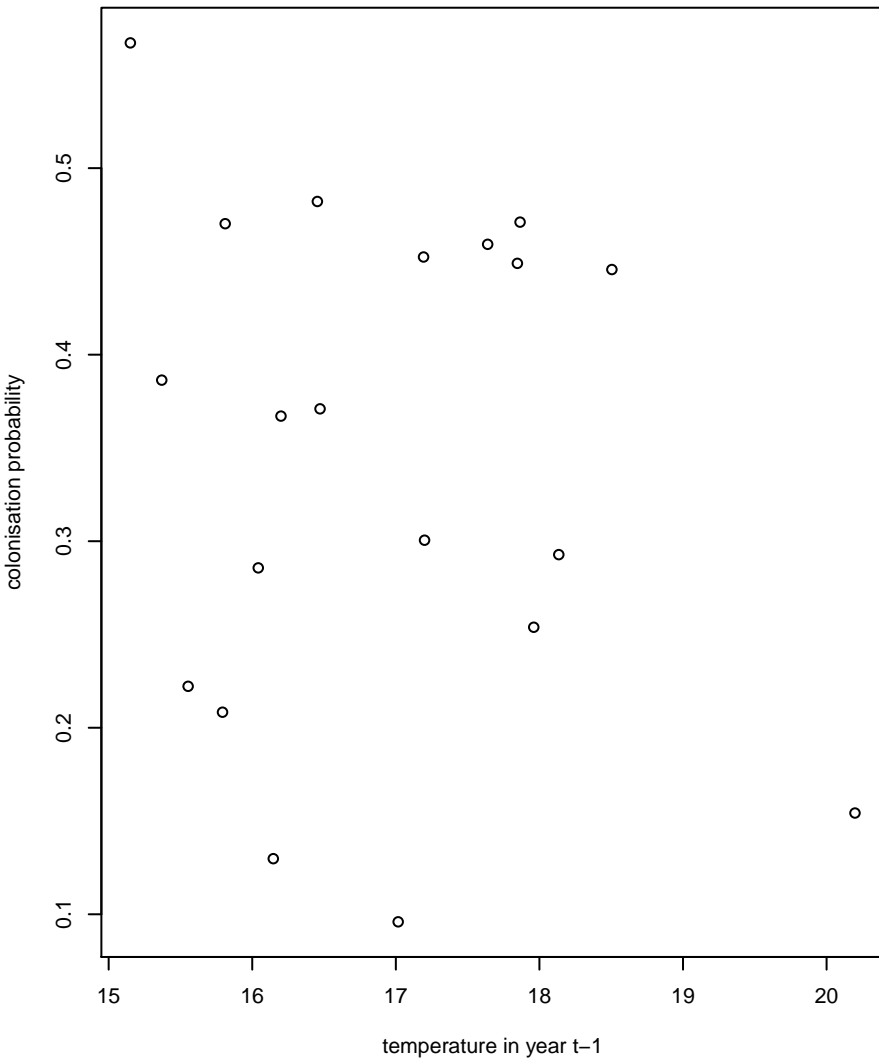

**Argynnis niobe**

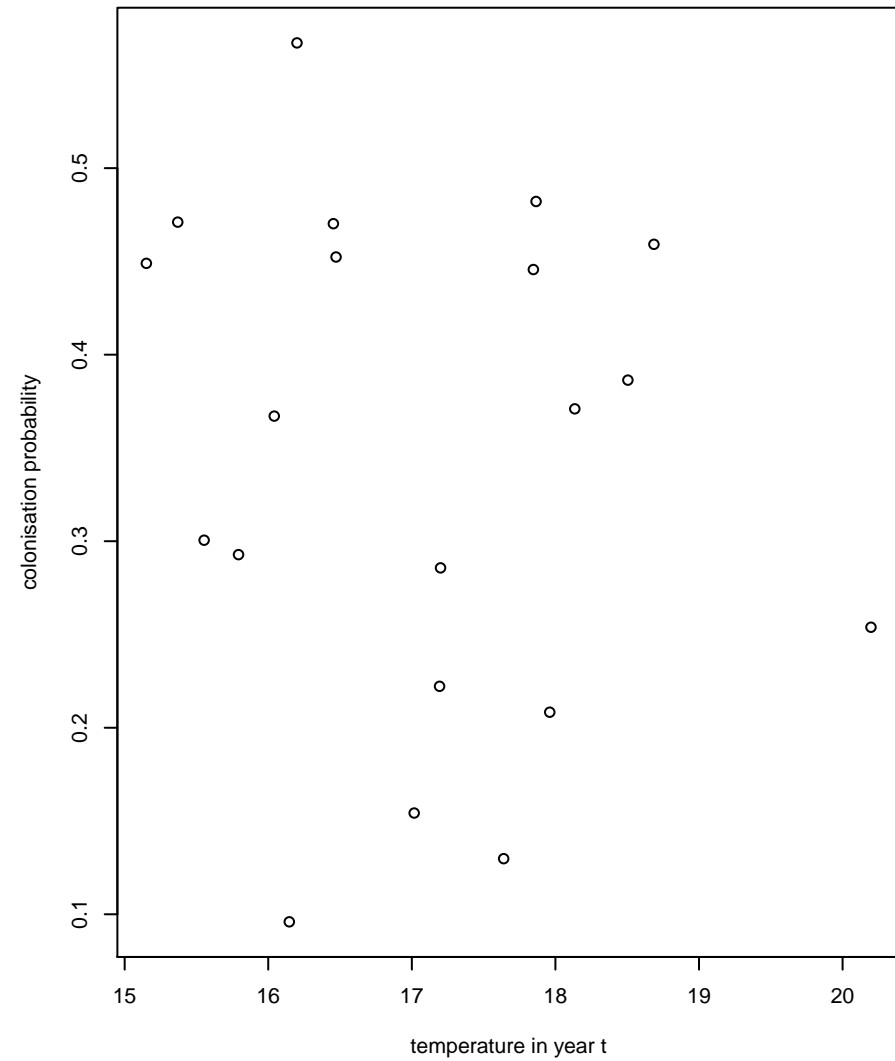

**Pararge aegeria**

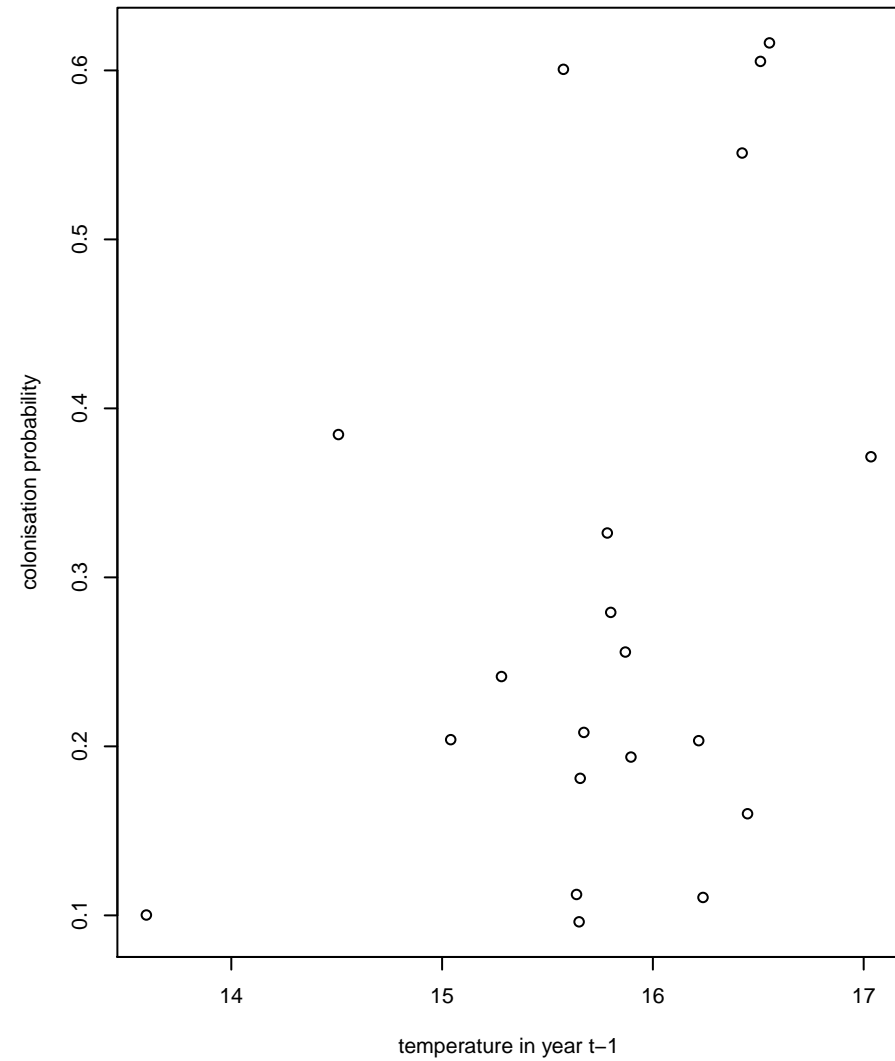

**Pararge aegeria**

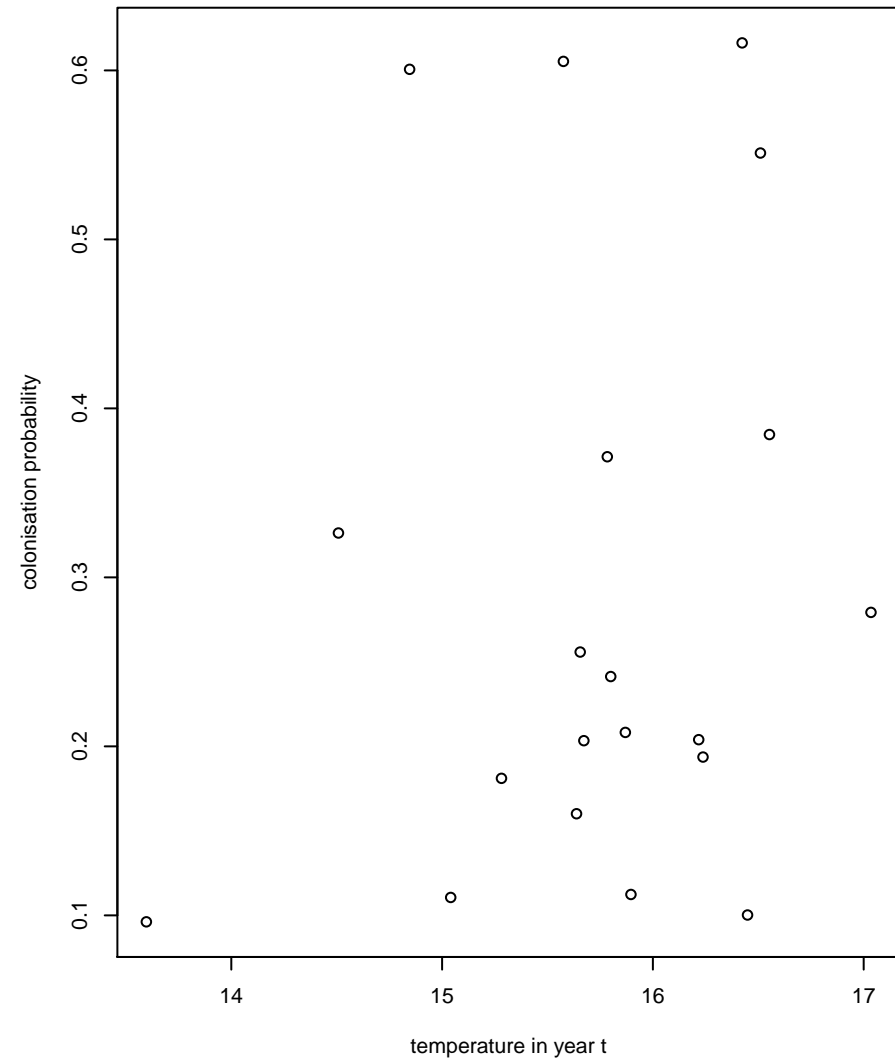

**Lasiommata megera**

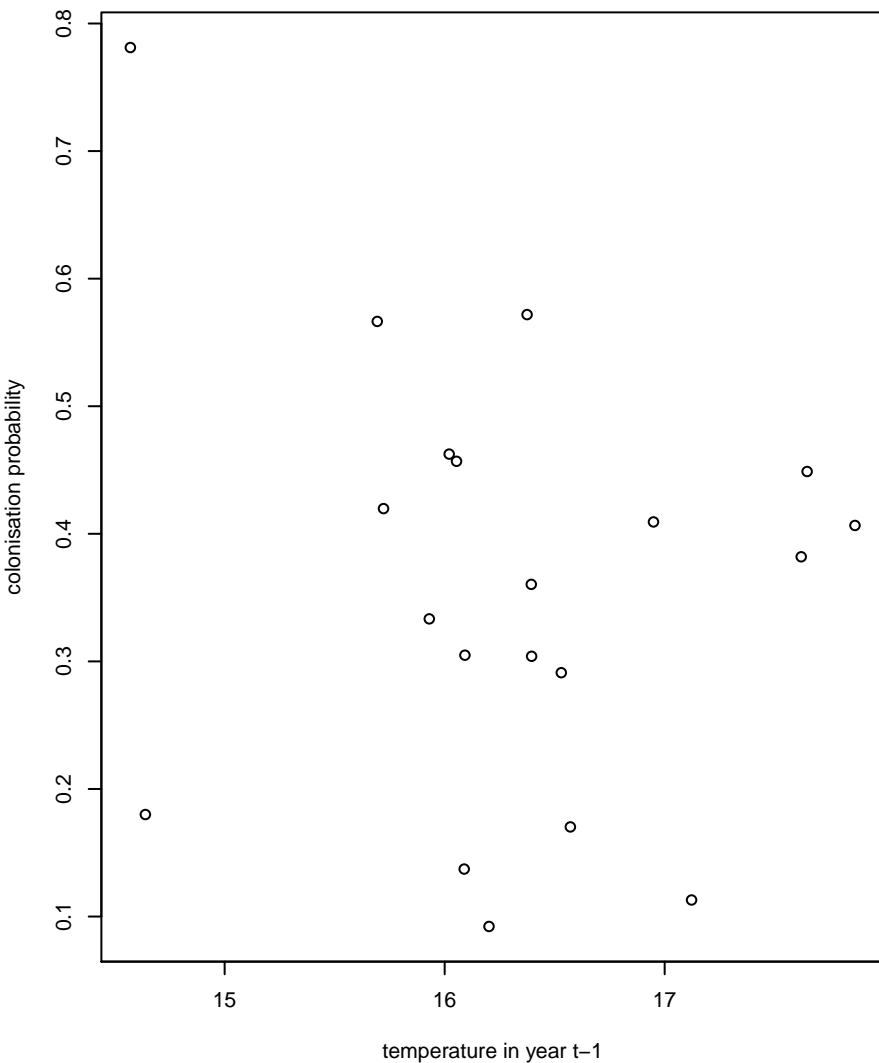

**Lasiommata megera**

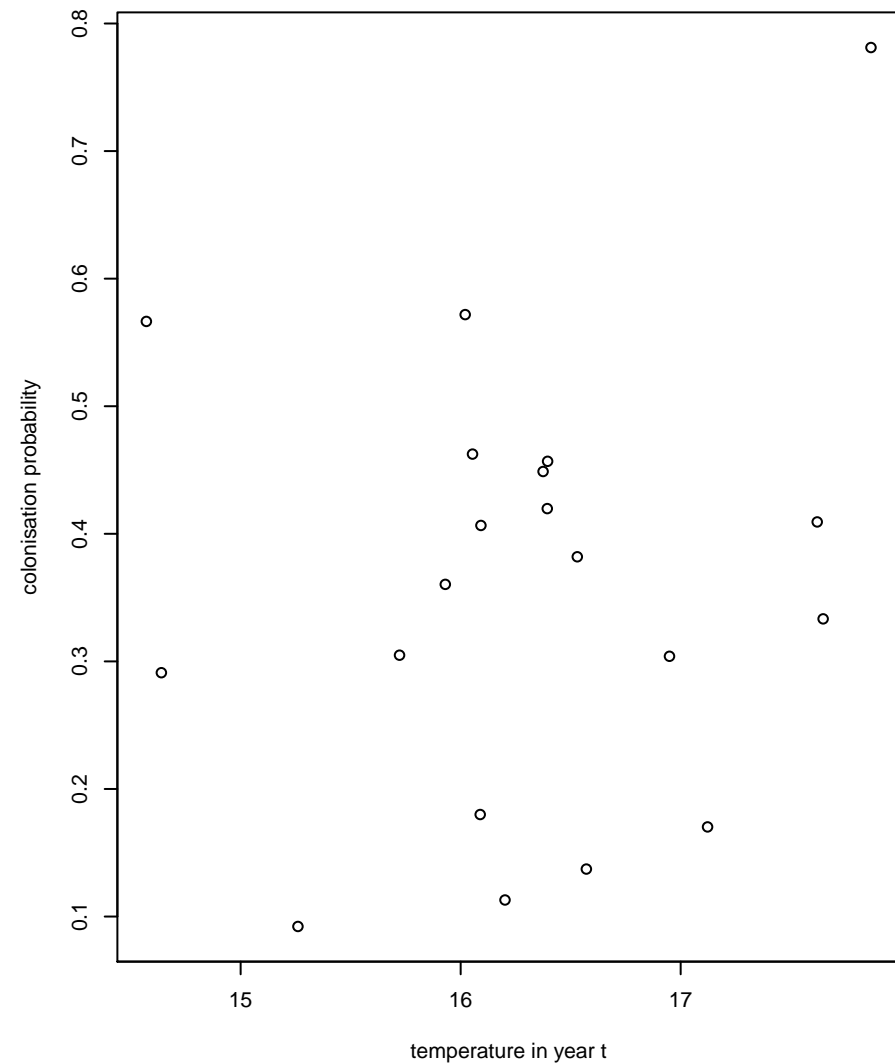

**Aphantopus hyperantus**

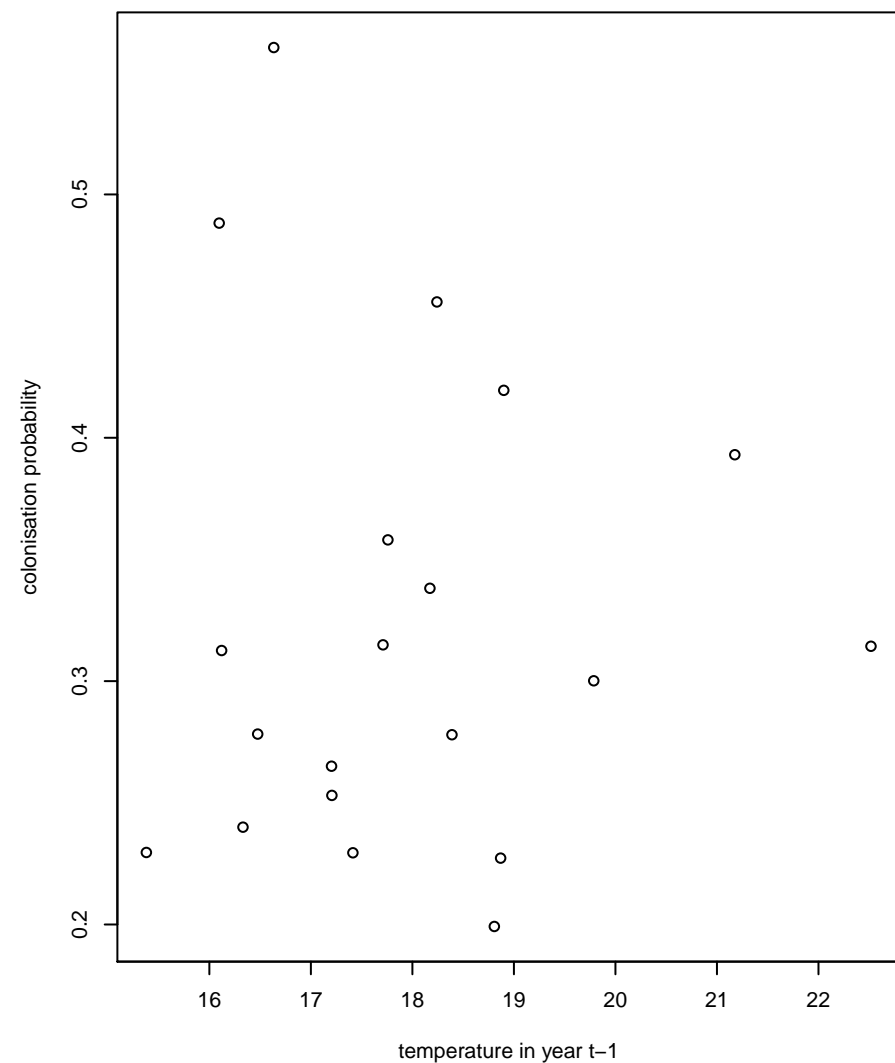

**Aphantopus hyperantus**

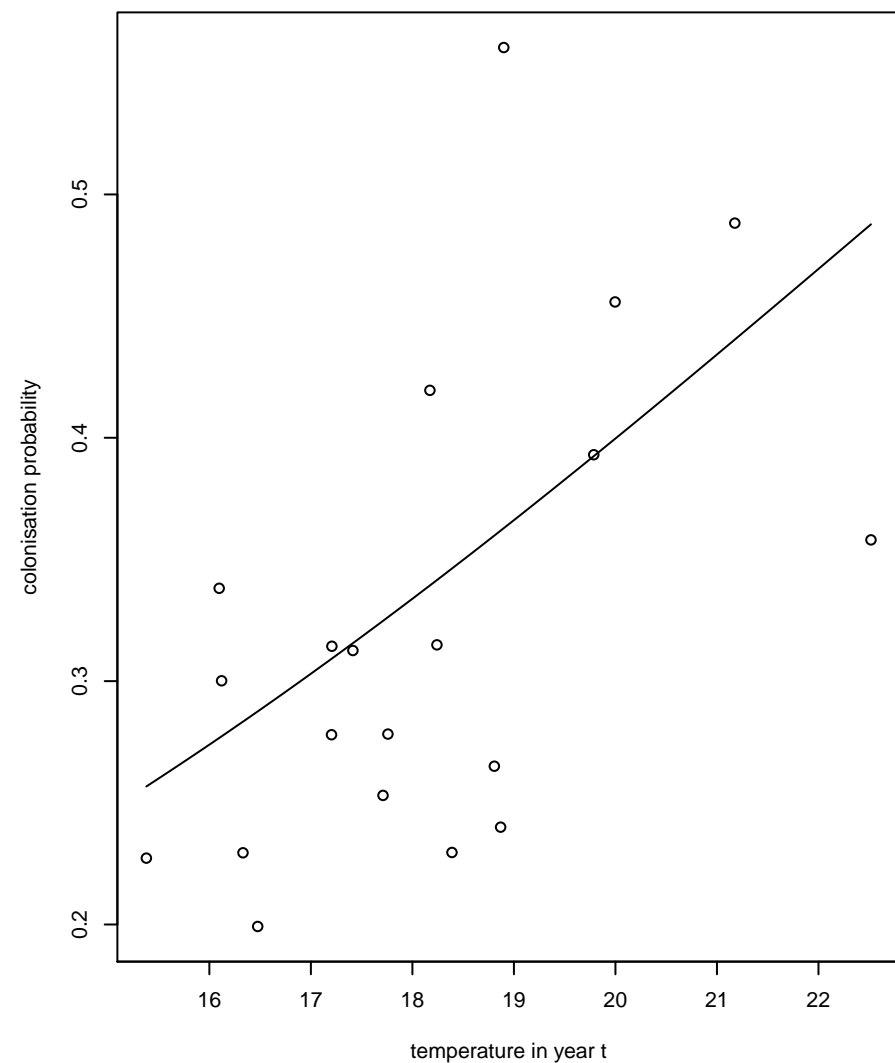



**Coenonympha pamphilus**

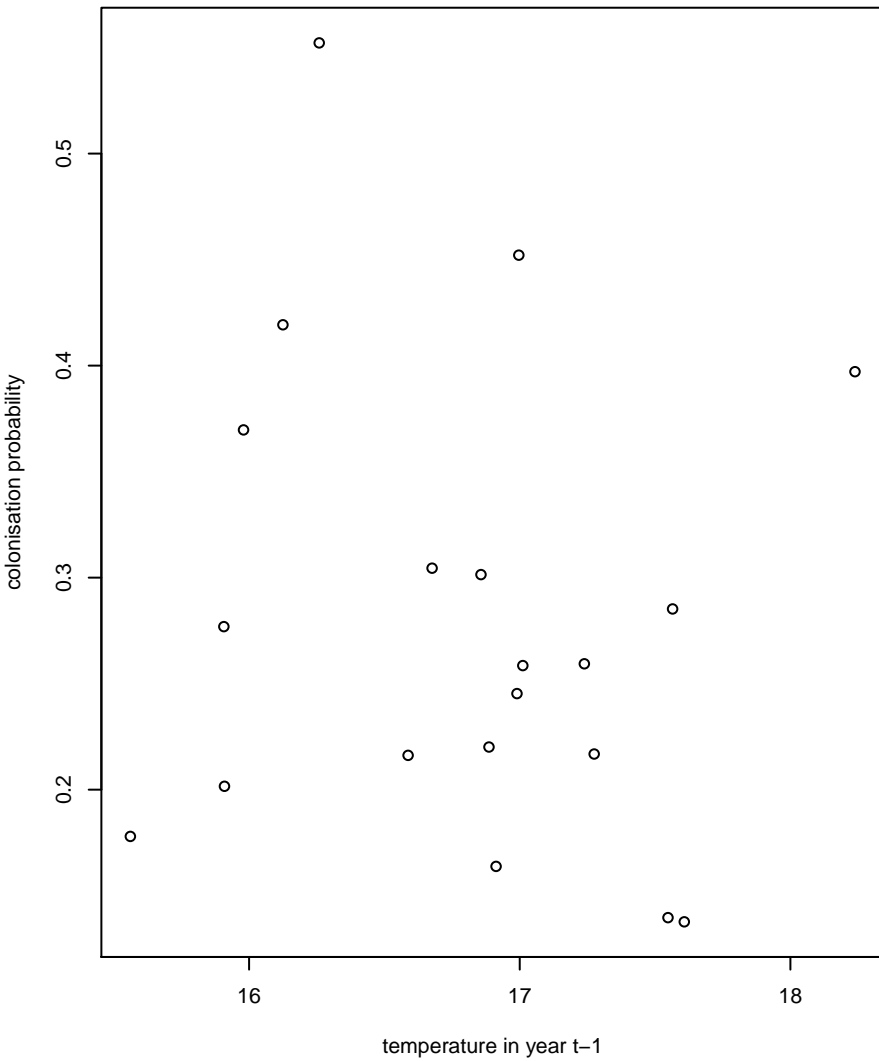

**Coenonympha pamphilus**

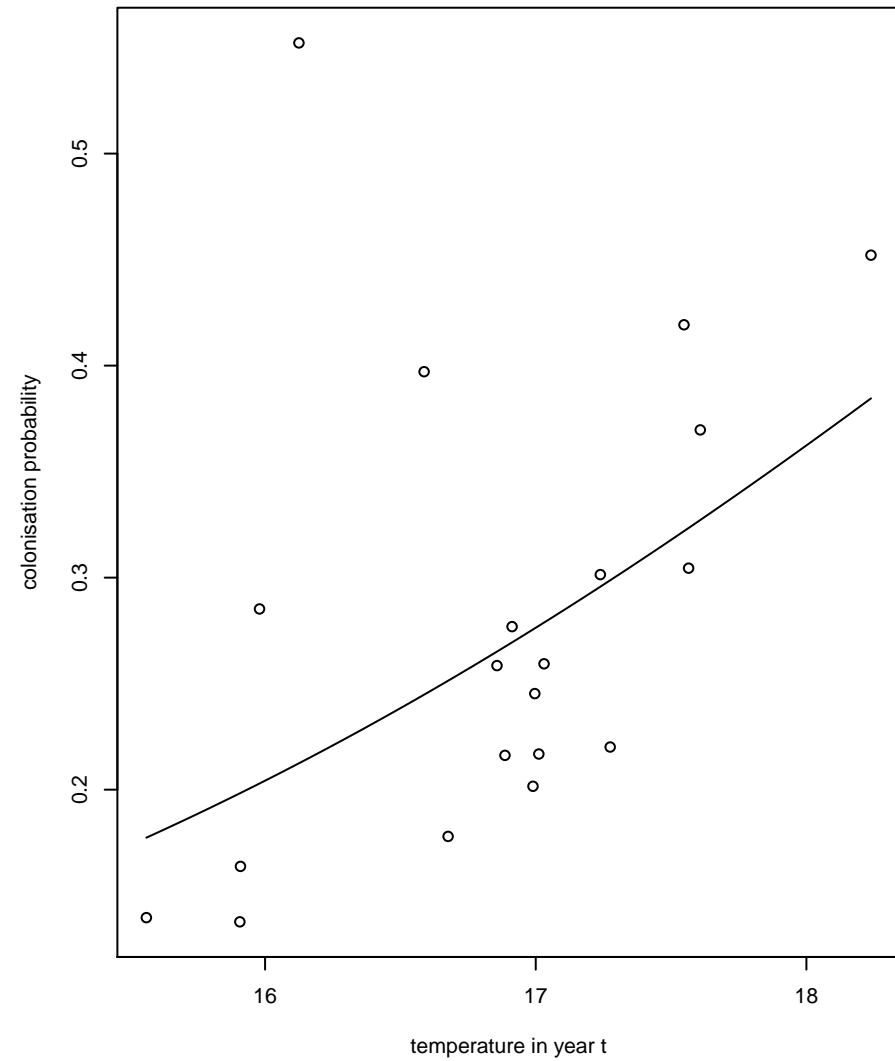

**Anguis fragilis**

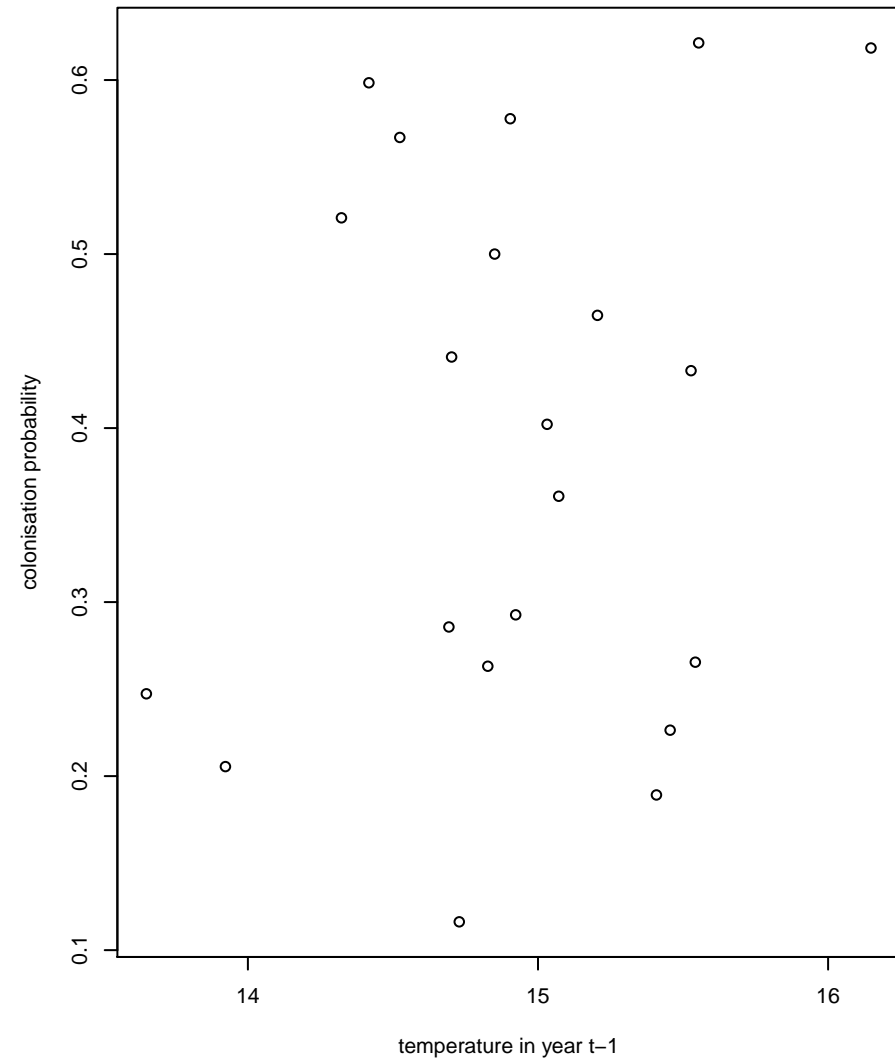

**Anguis fragilis**

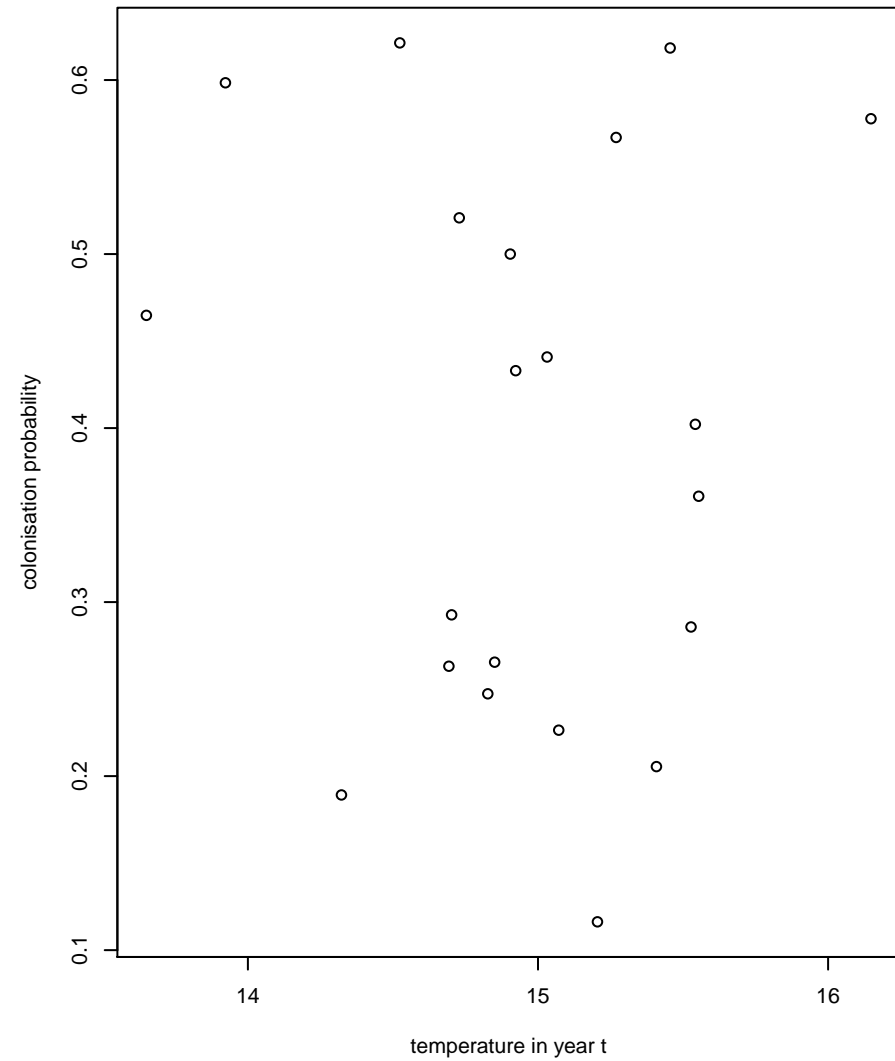

**Lacerta agilis**

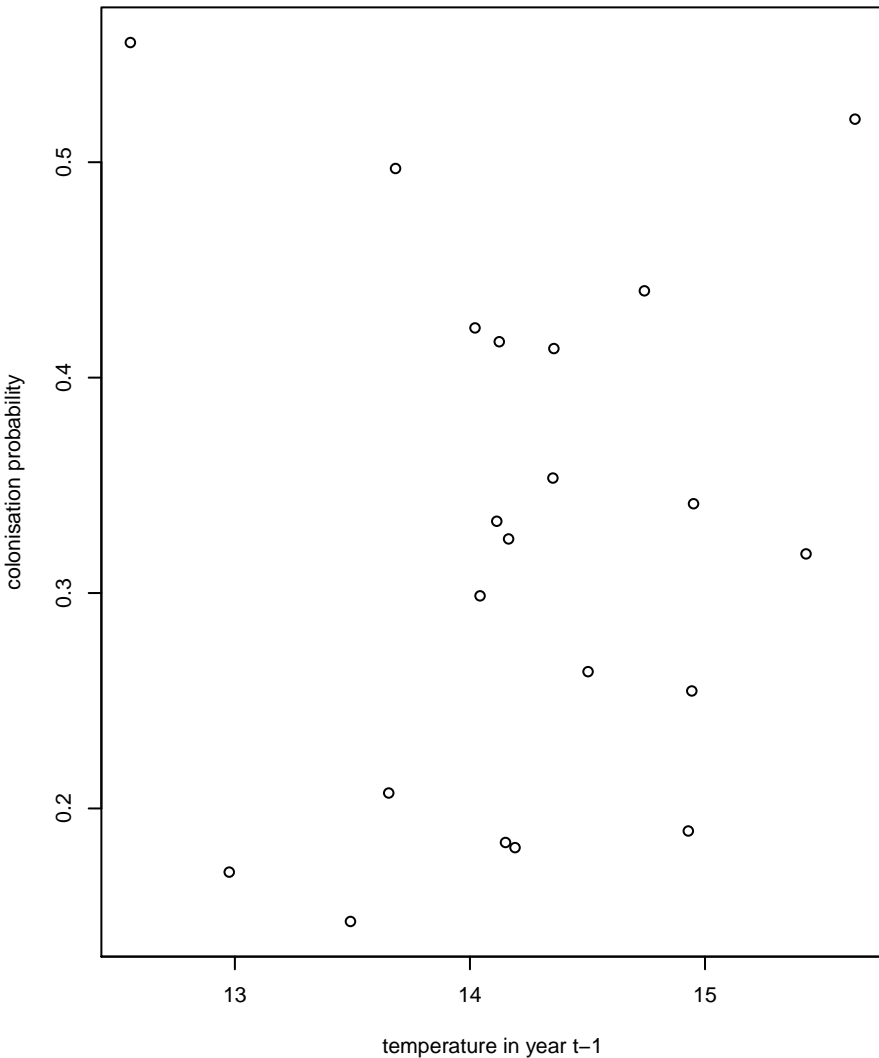

**Lacerta agilis**

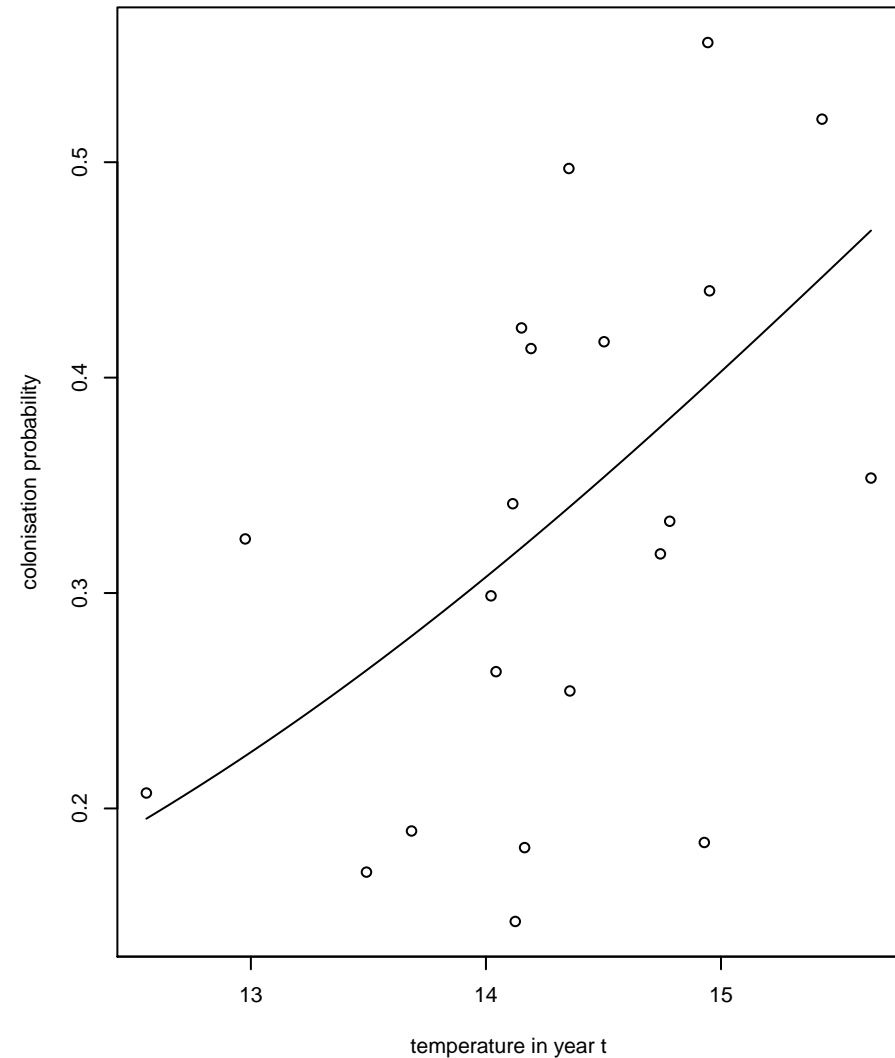

**zootocavivipara**

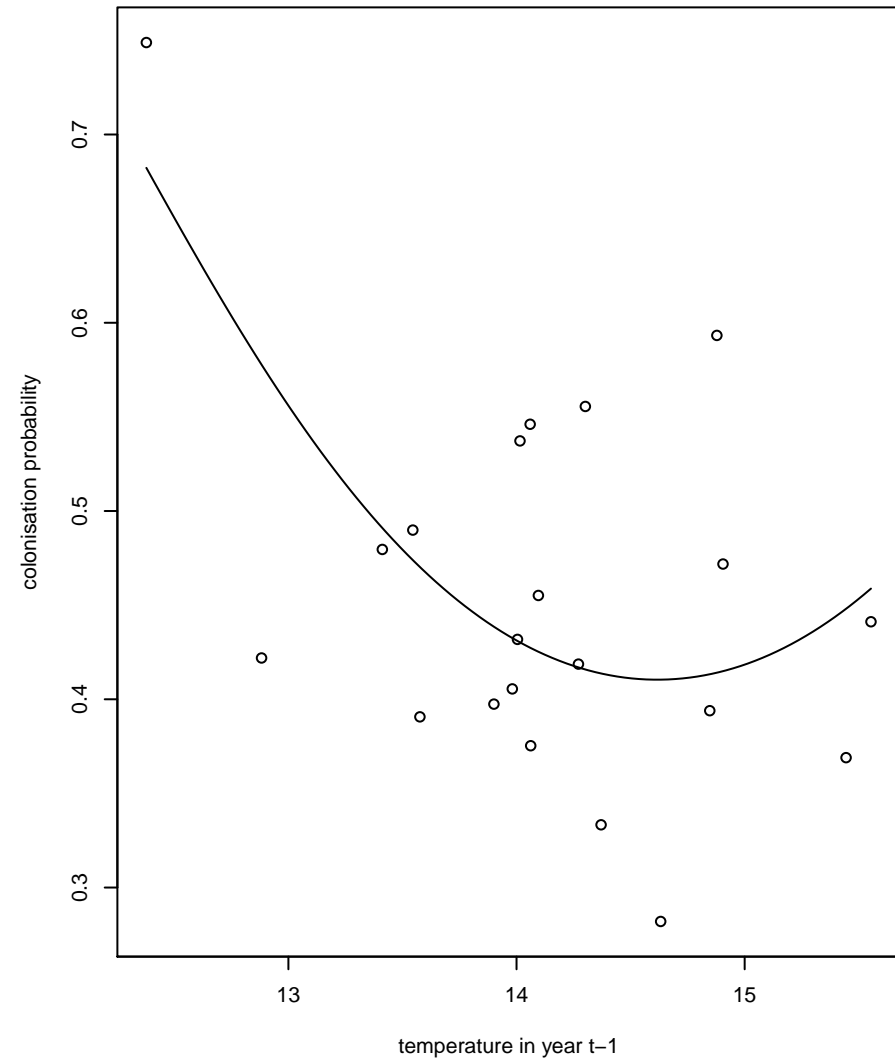

**zootocavivipara**

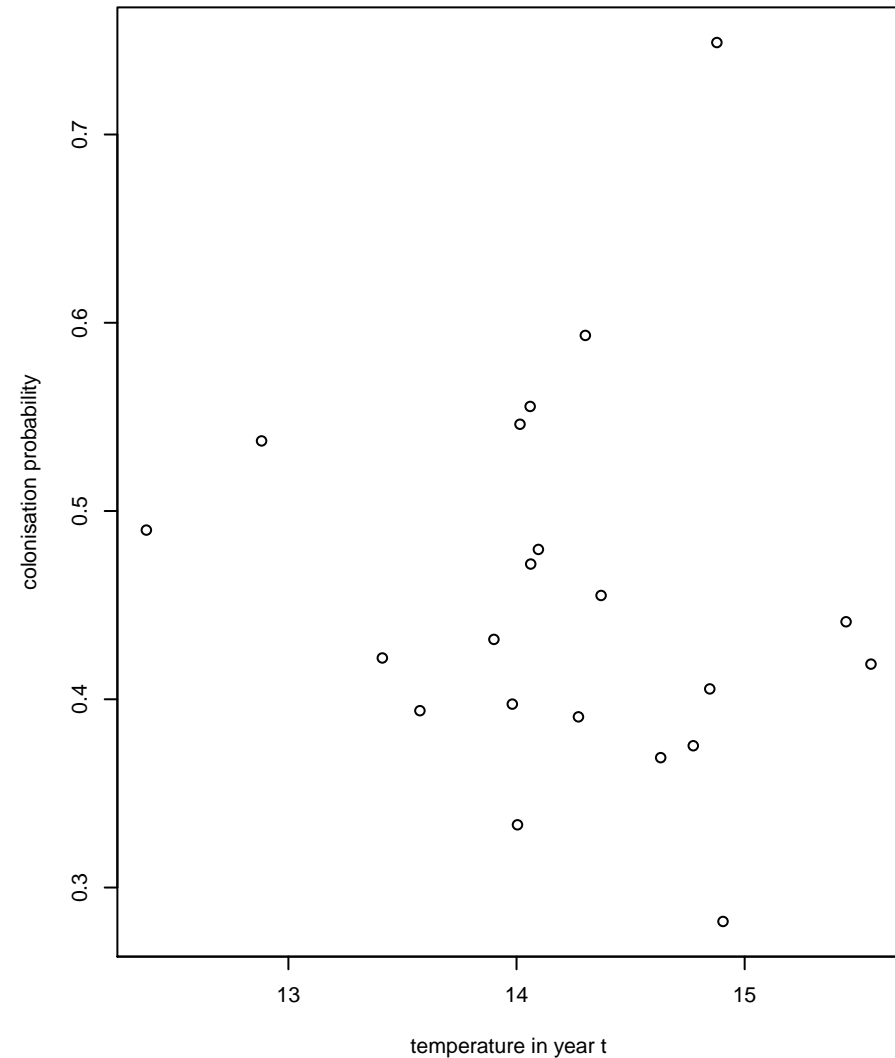

**Coronella austriaca**

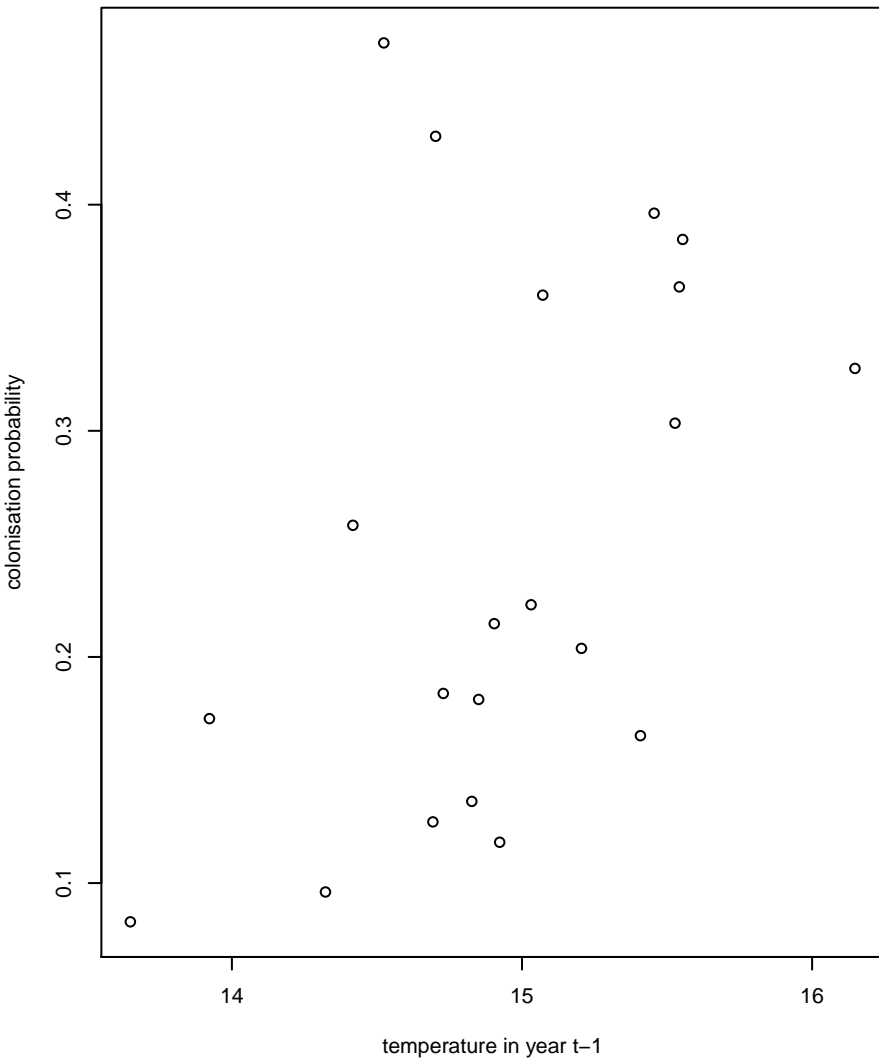

**Coronella austriaca**

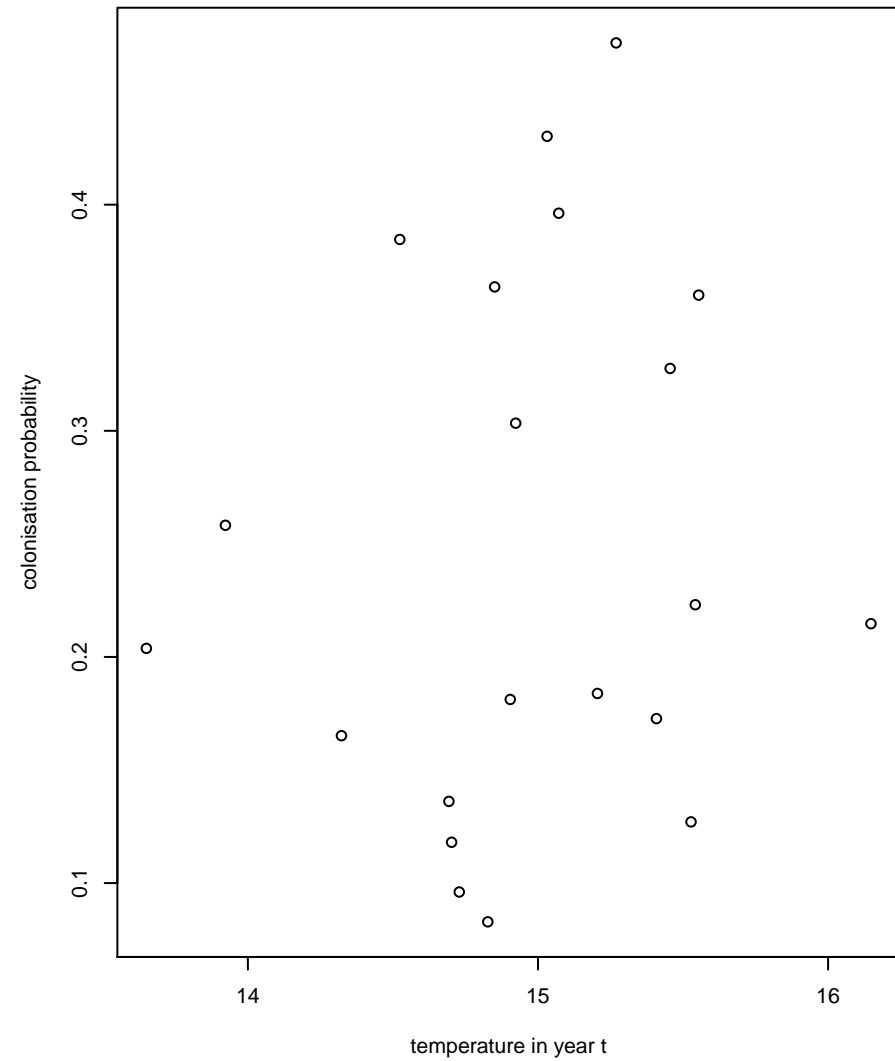

**Natrix natrix**

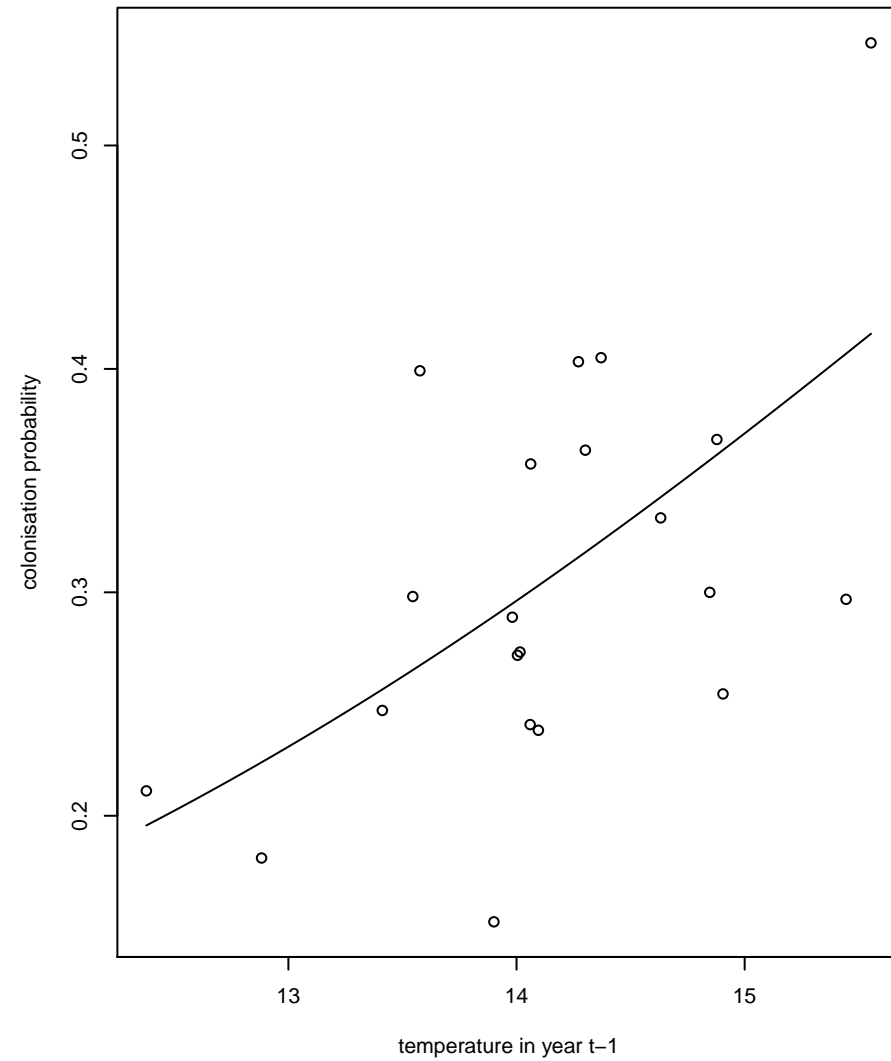

**Natrix natrix**

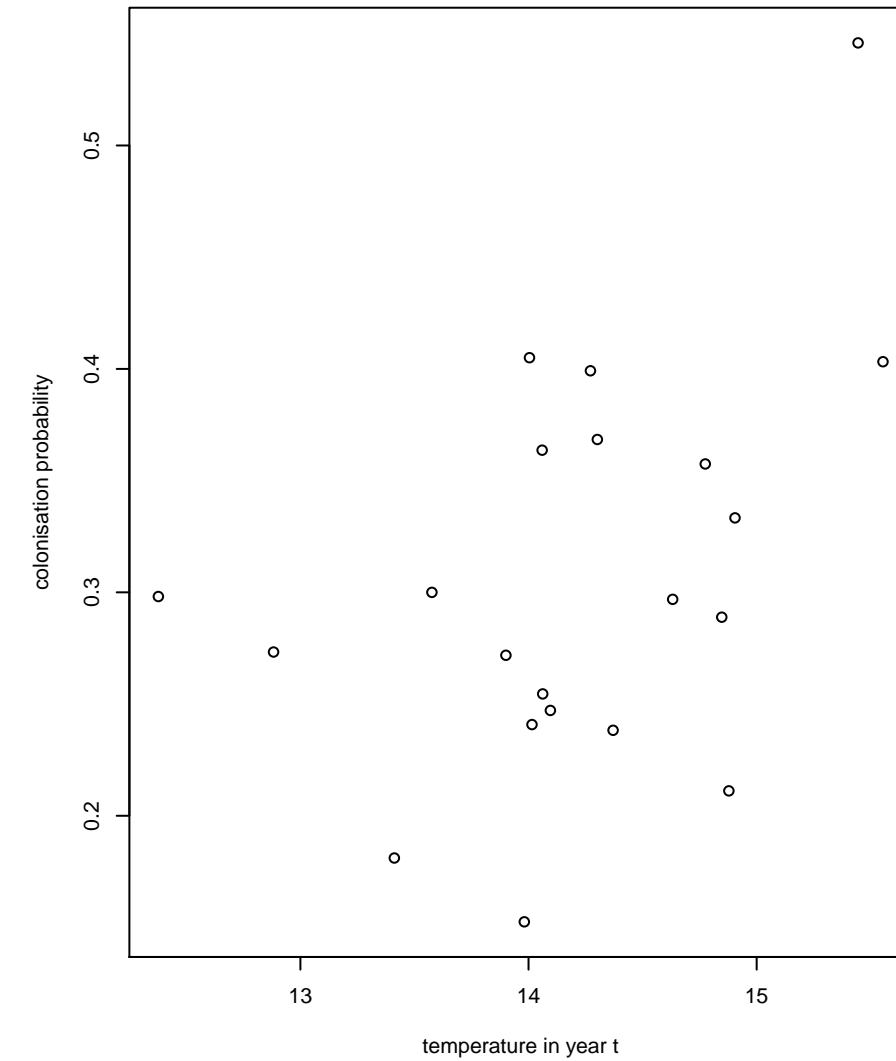

**Vipera berus**

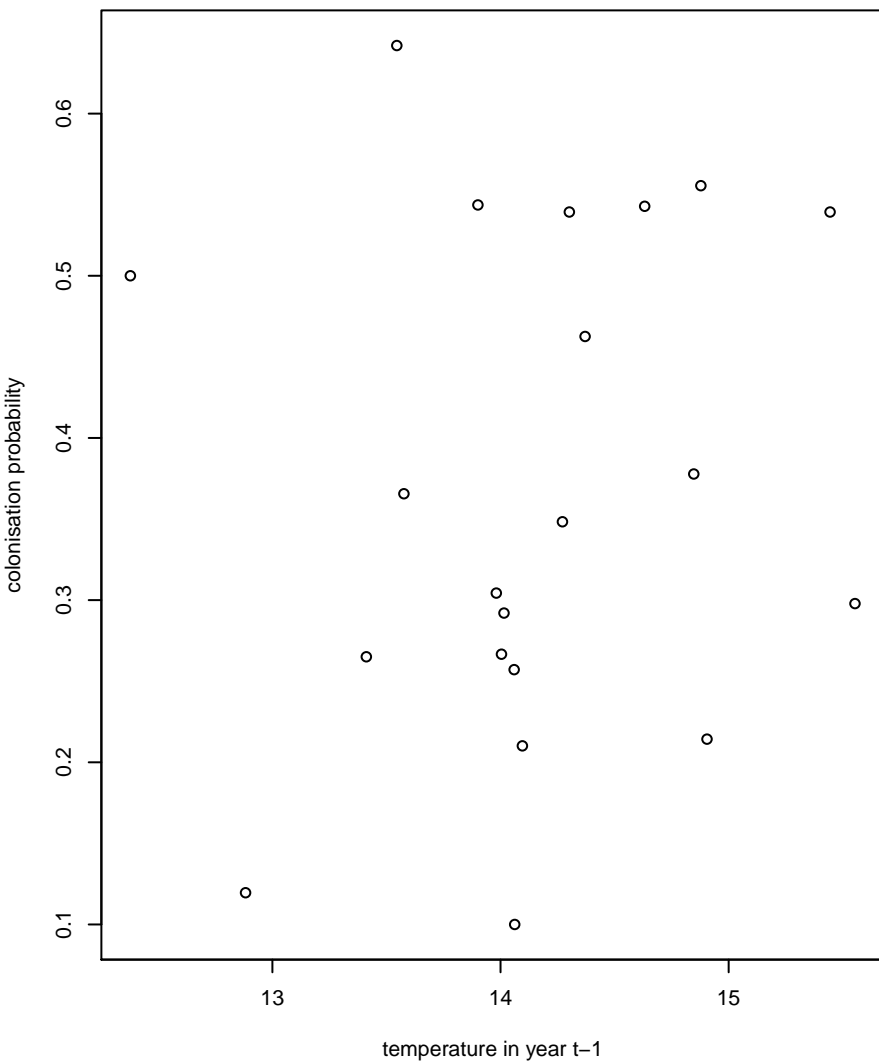

**Vipera berus**

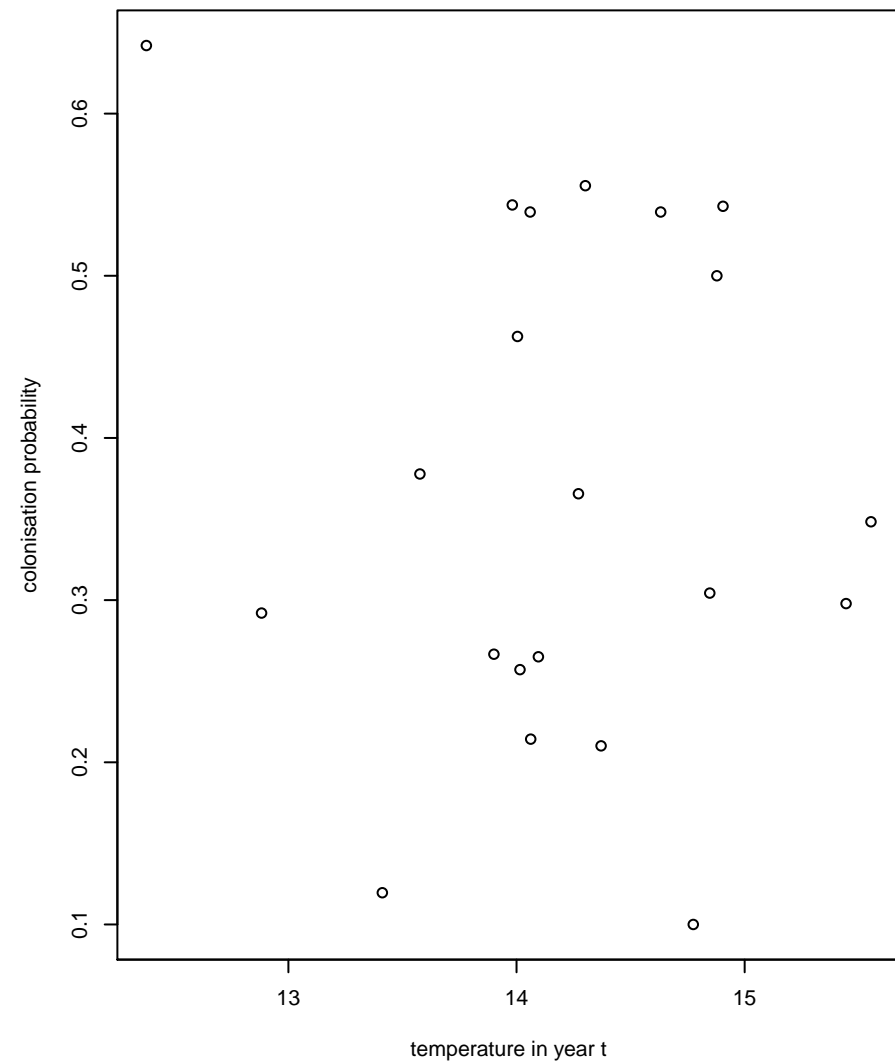

**Chorthippus albomarginatus**

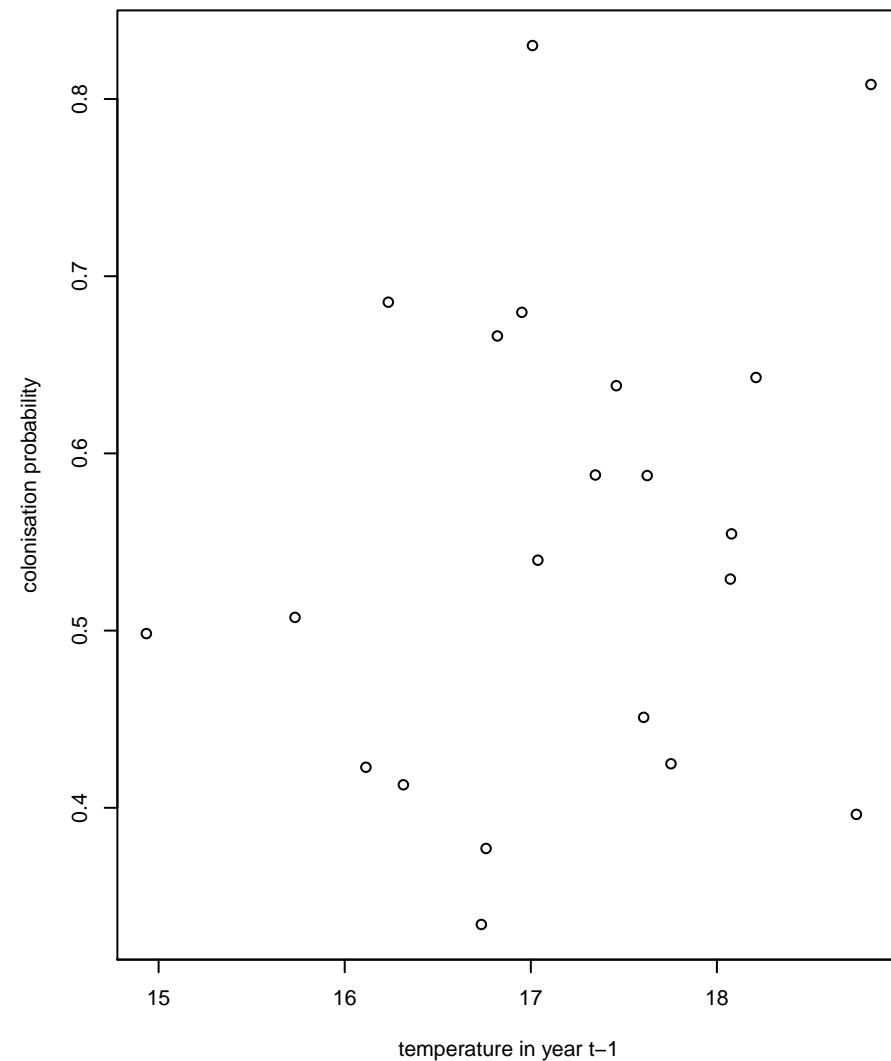

**Chorthippus albomarginatus**

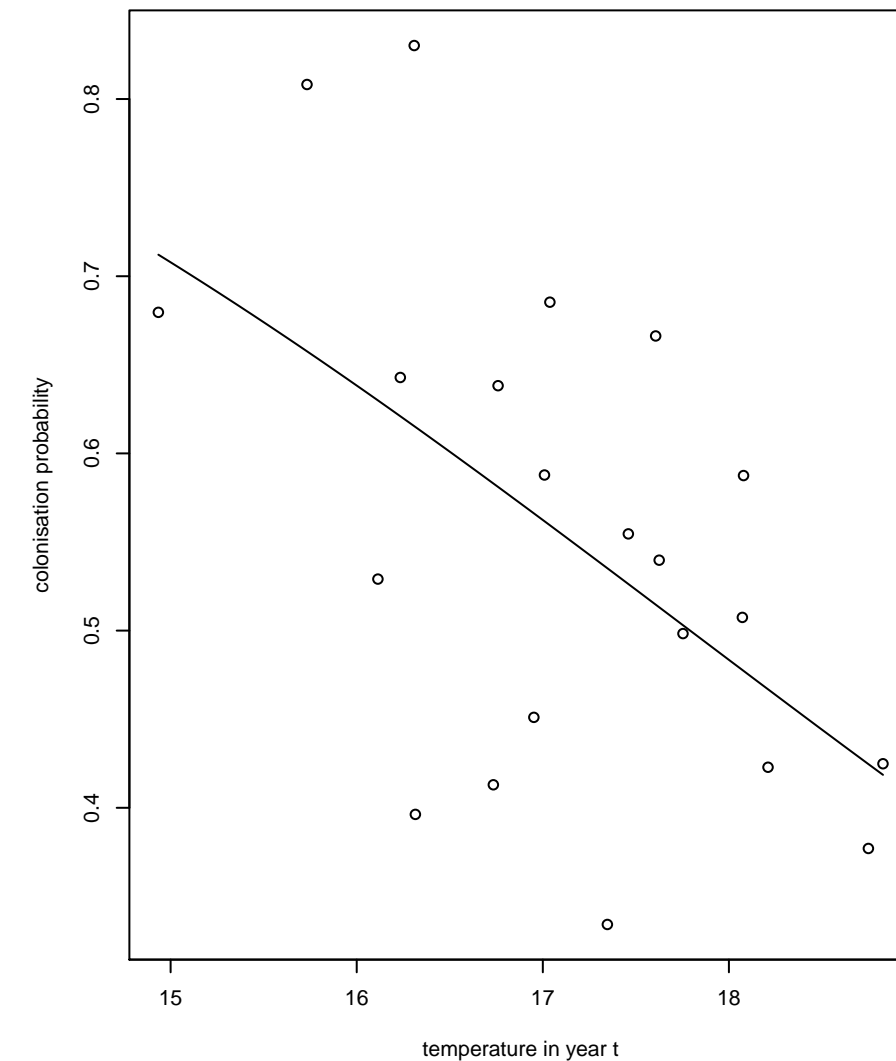

**Chorthippus biguttulus**

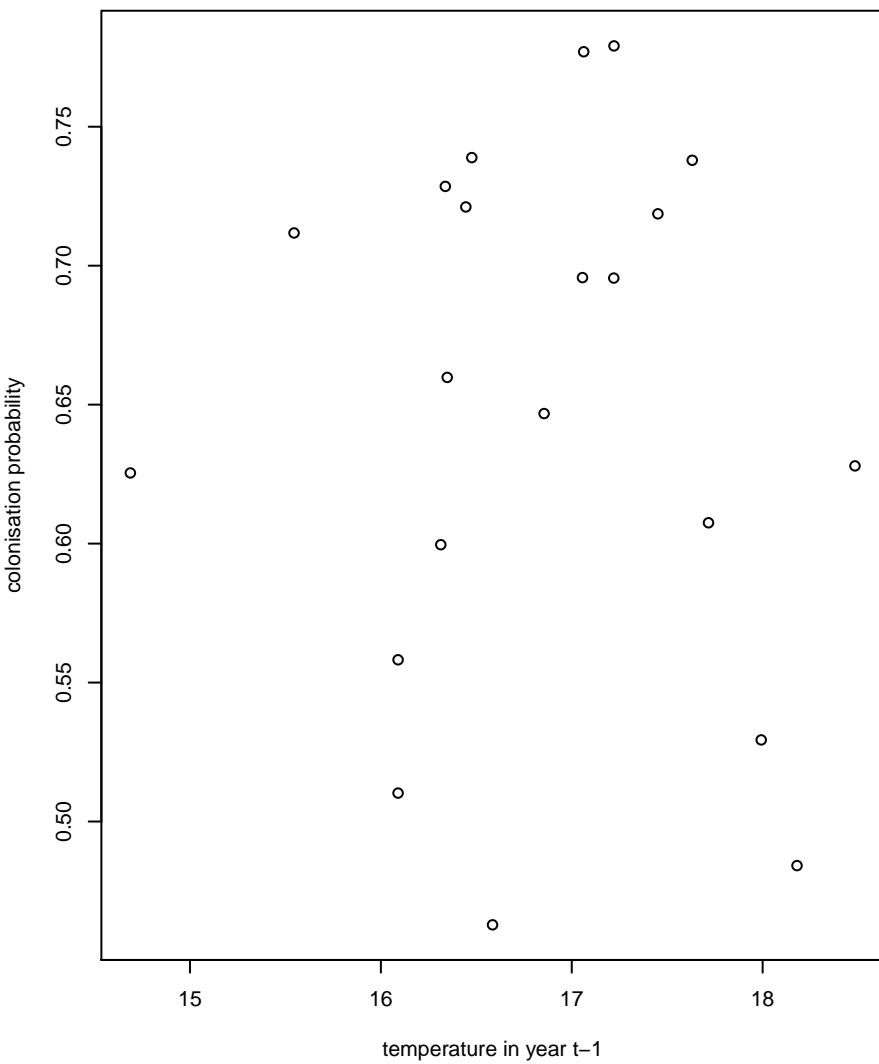

**Chorthippus biguttulus**

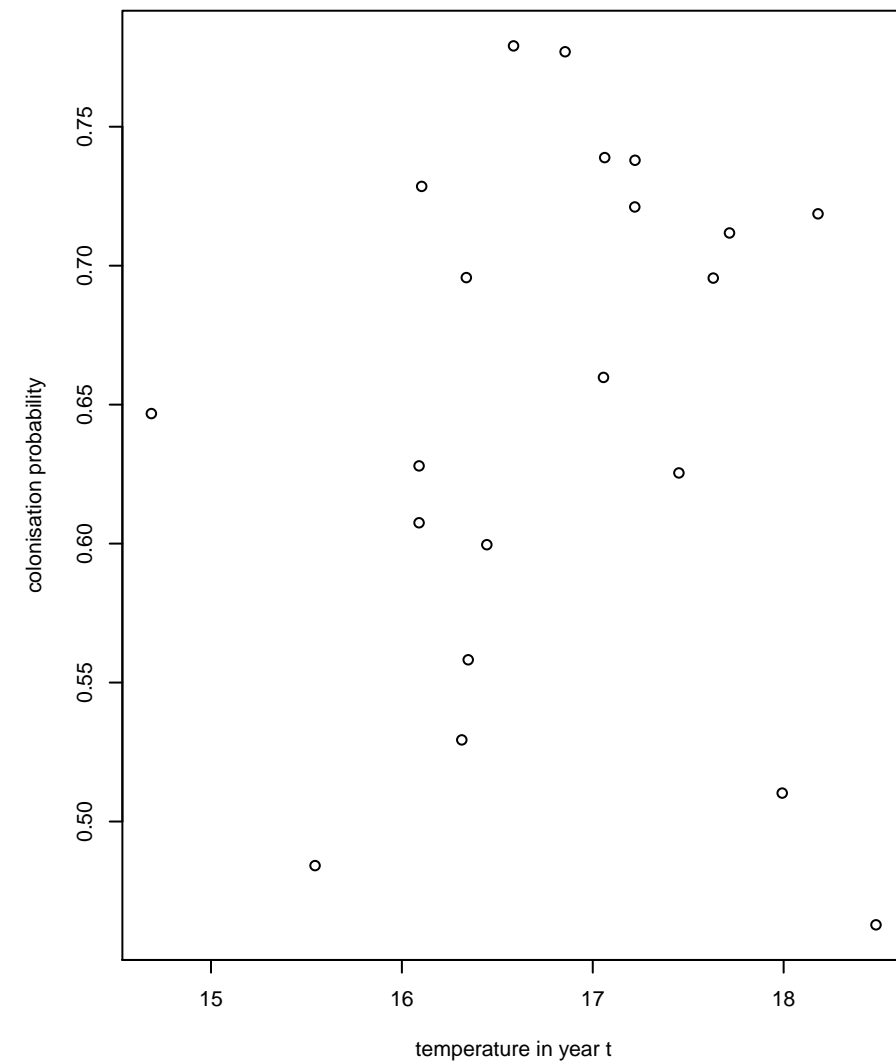

**Chorthippus brunneus**

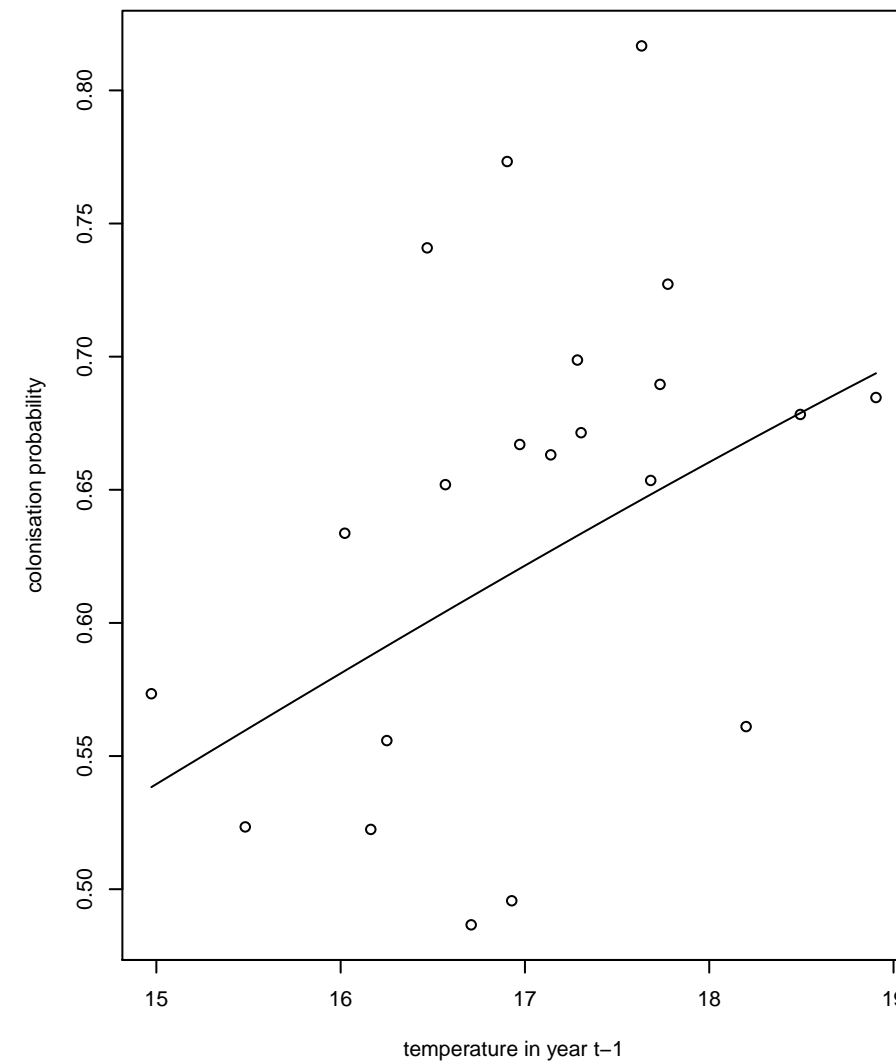

**Chorthippus brunneus**

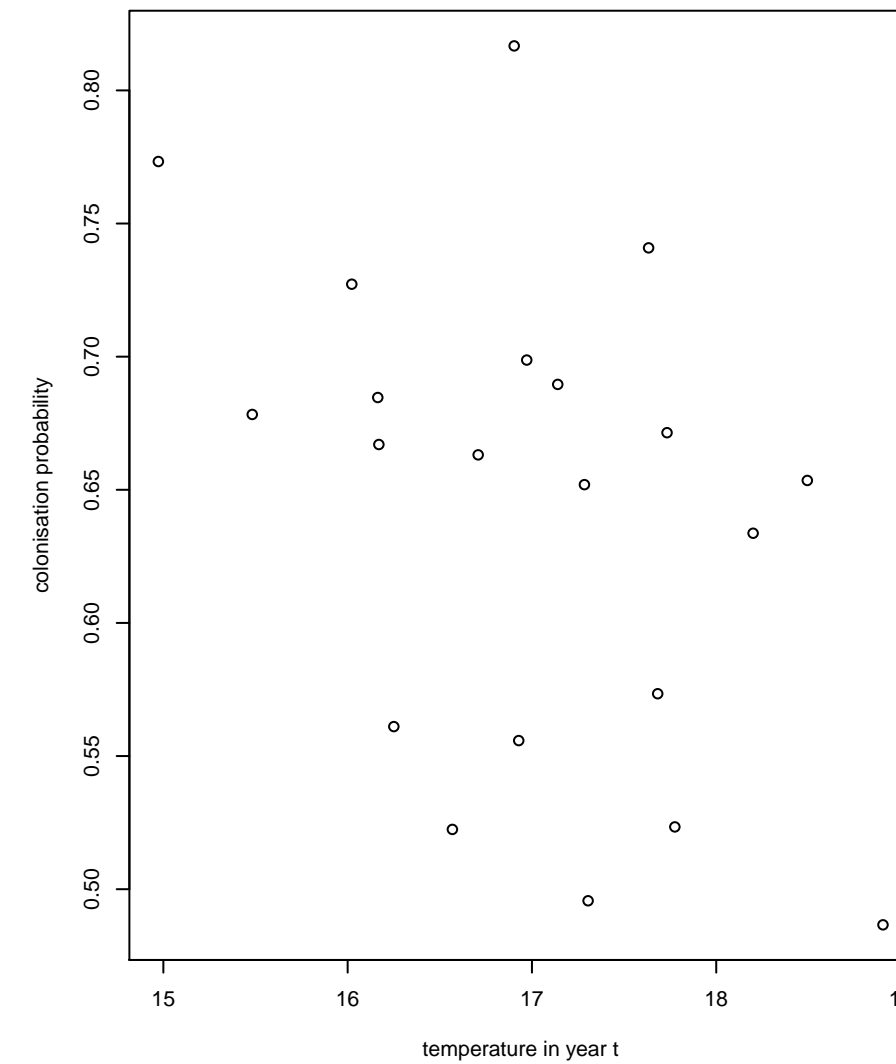

**Chorthippus mollis**

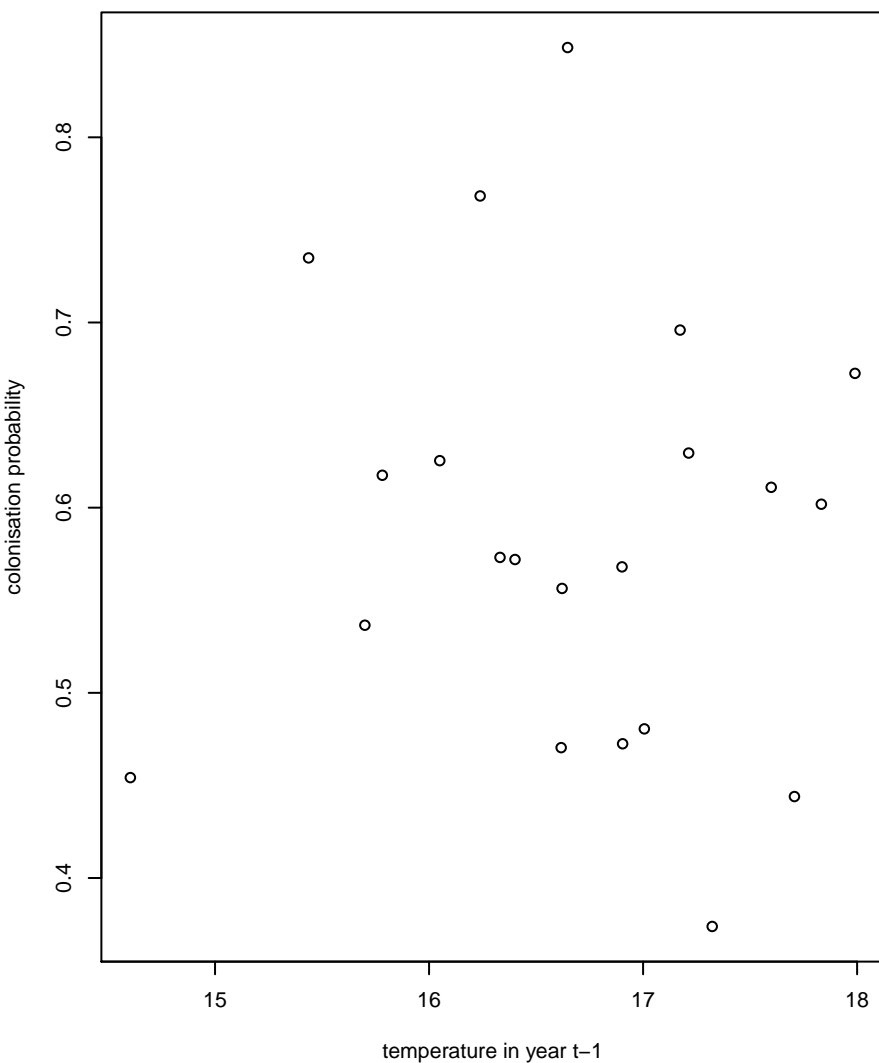

**Chorthippus mollis**

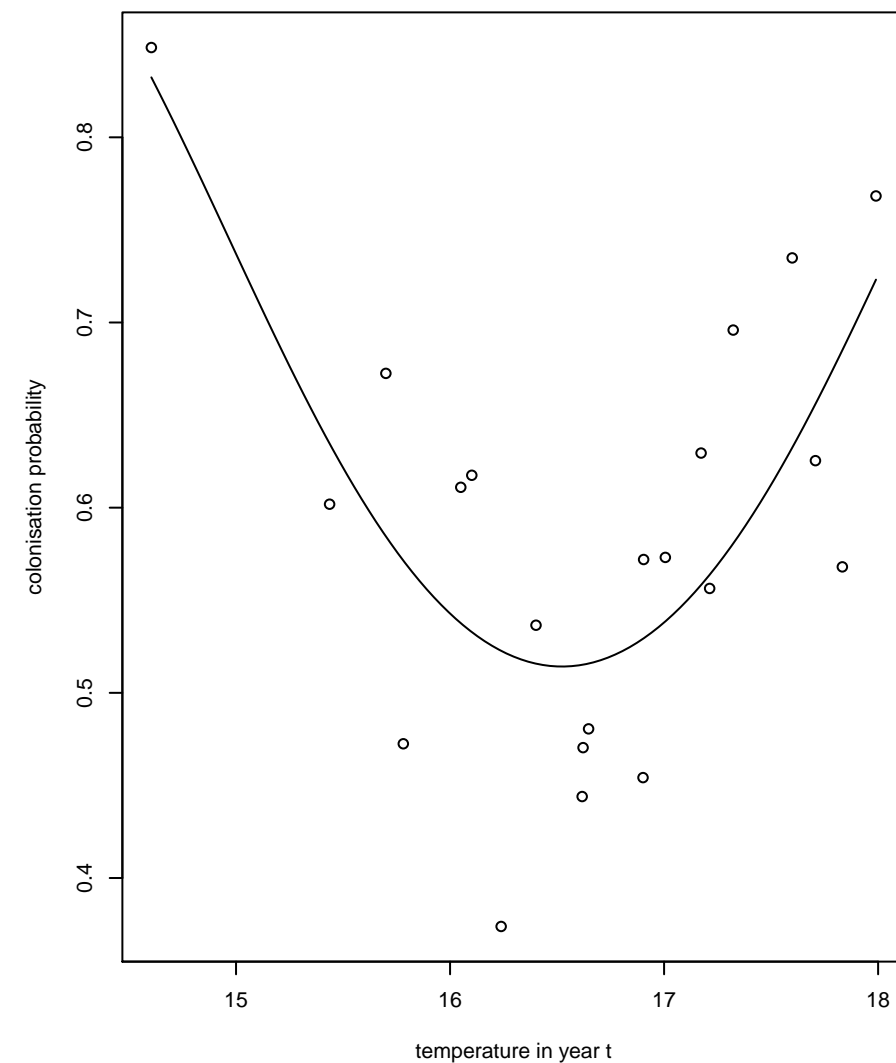

**Chorthippus parallelus**

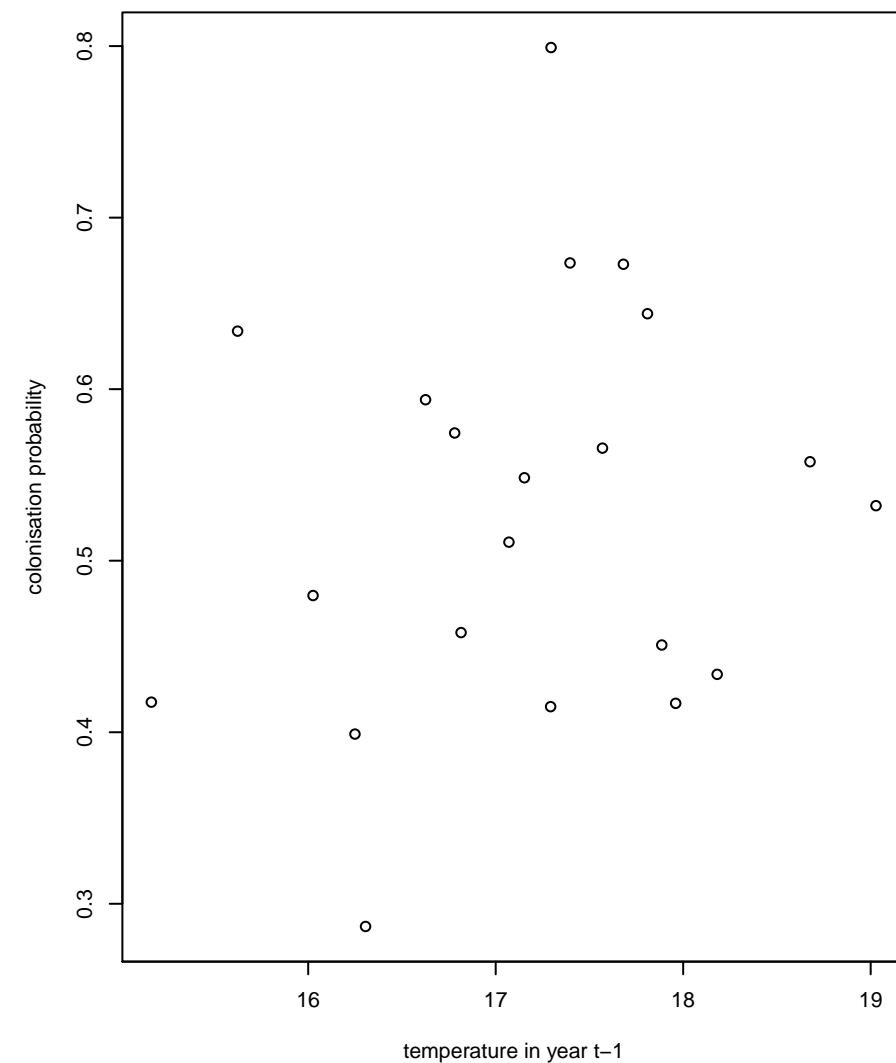

**Chorthippus parallelus**

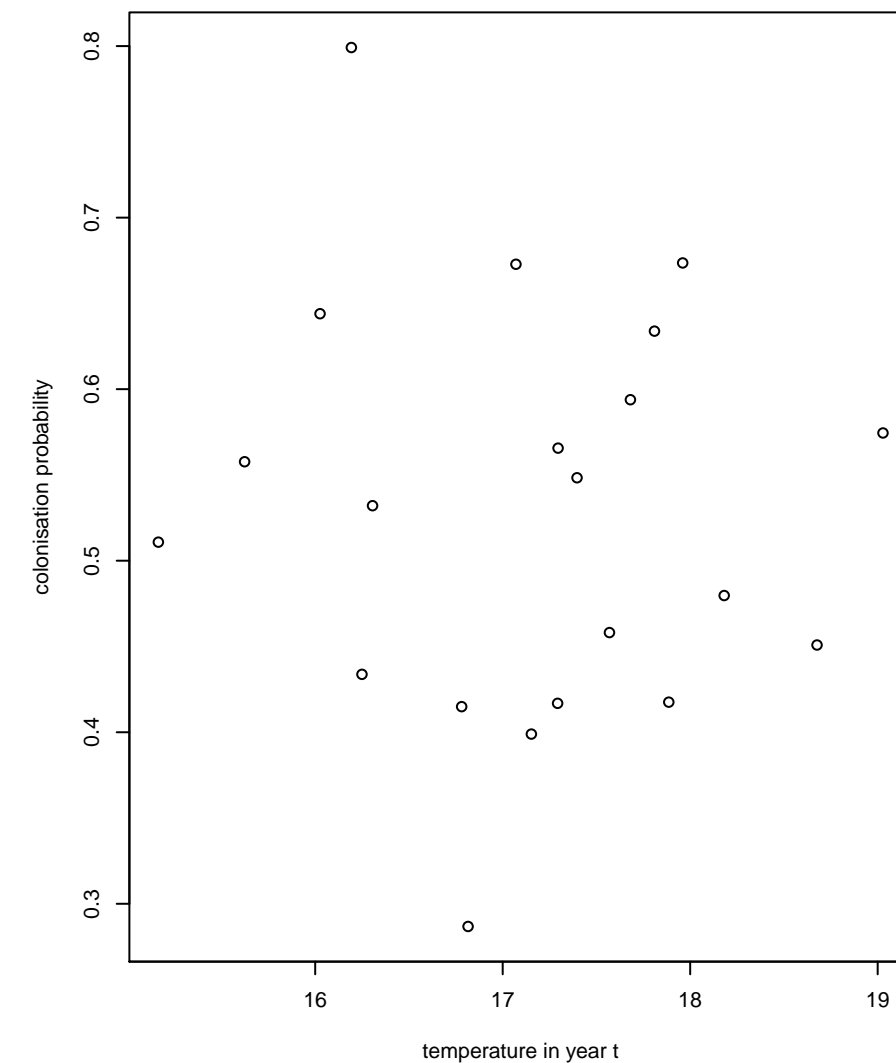

**Chrysochraon dispar**

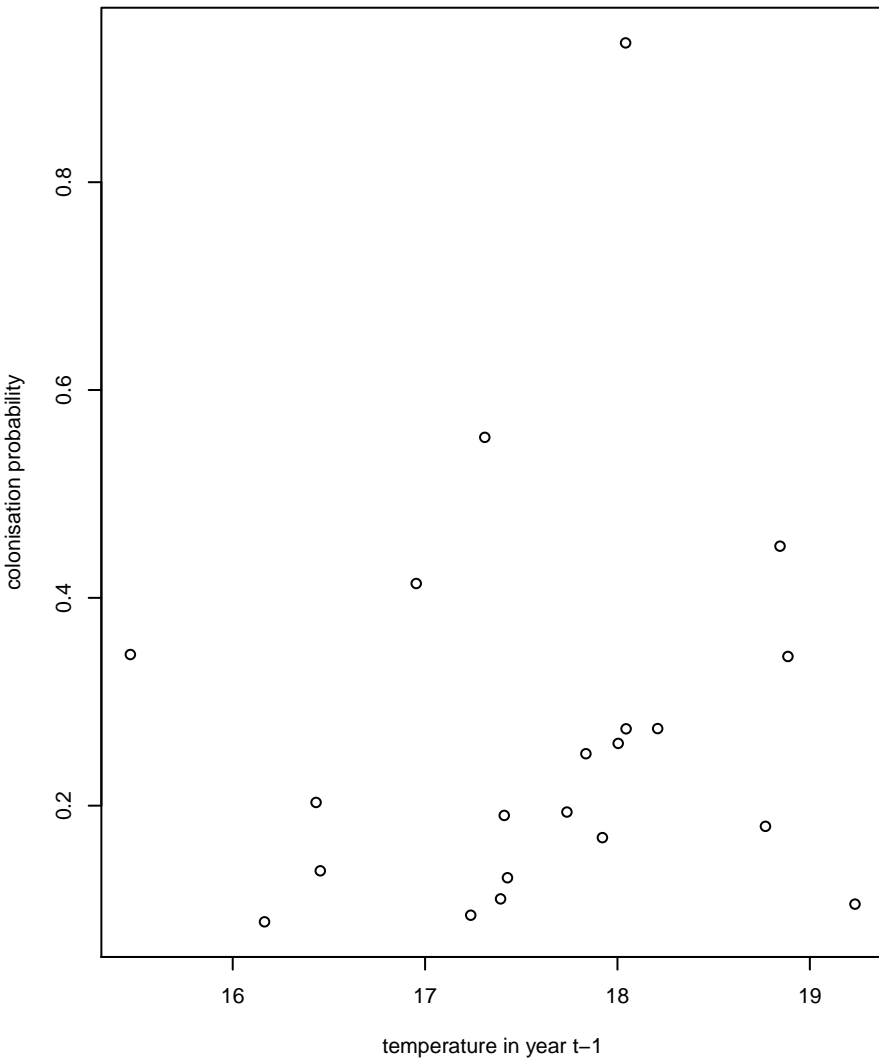

**Chrysochraon dispar**

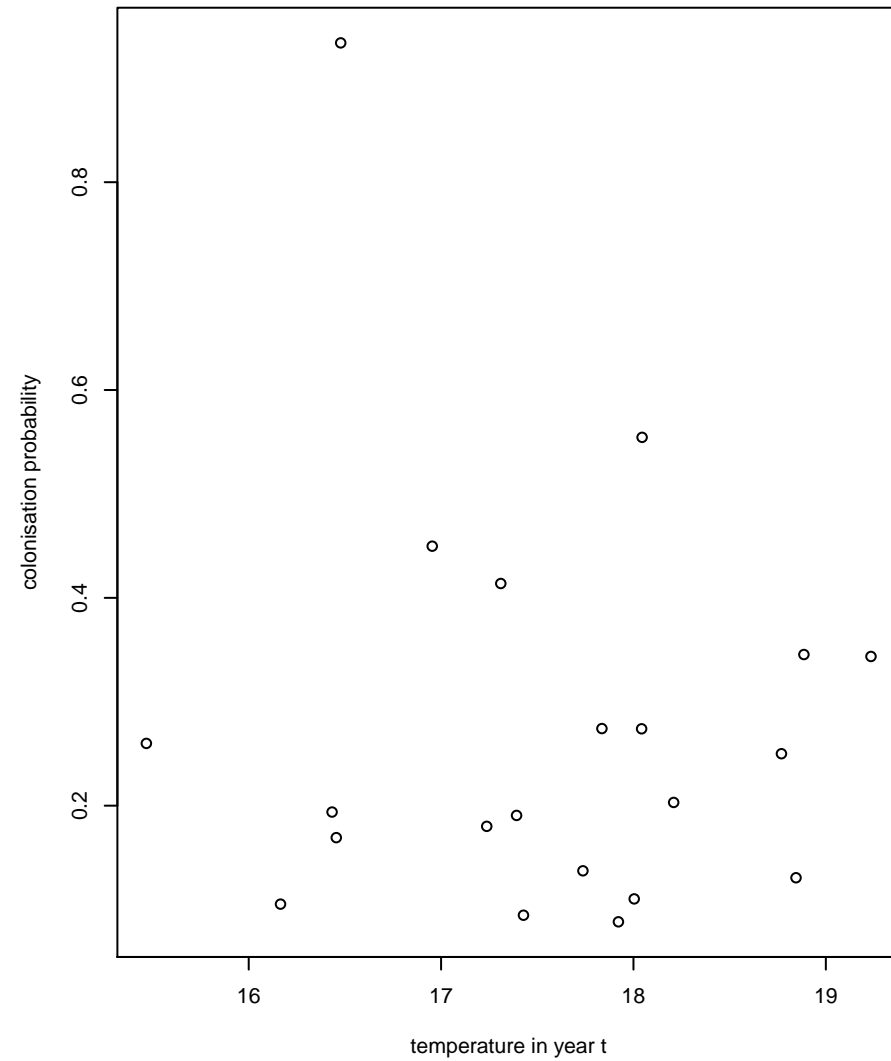

**Conocephalus dorsalis**

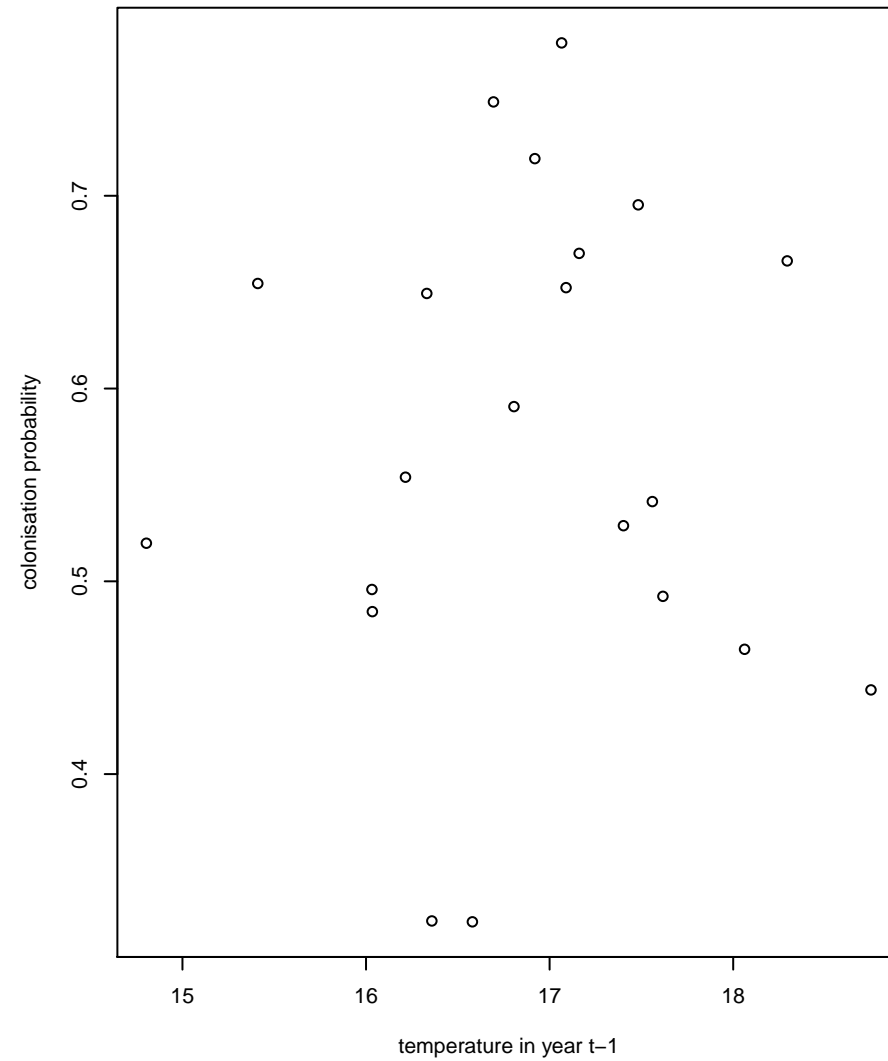

**Conocephalus dorsalis**

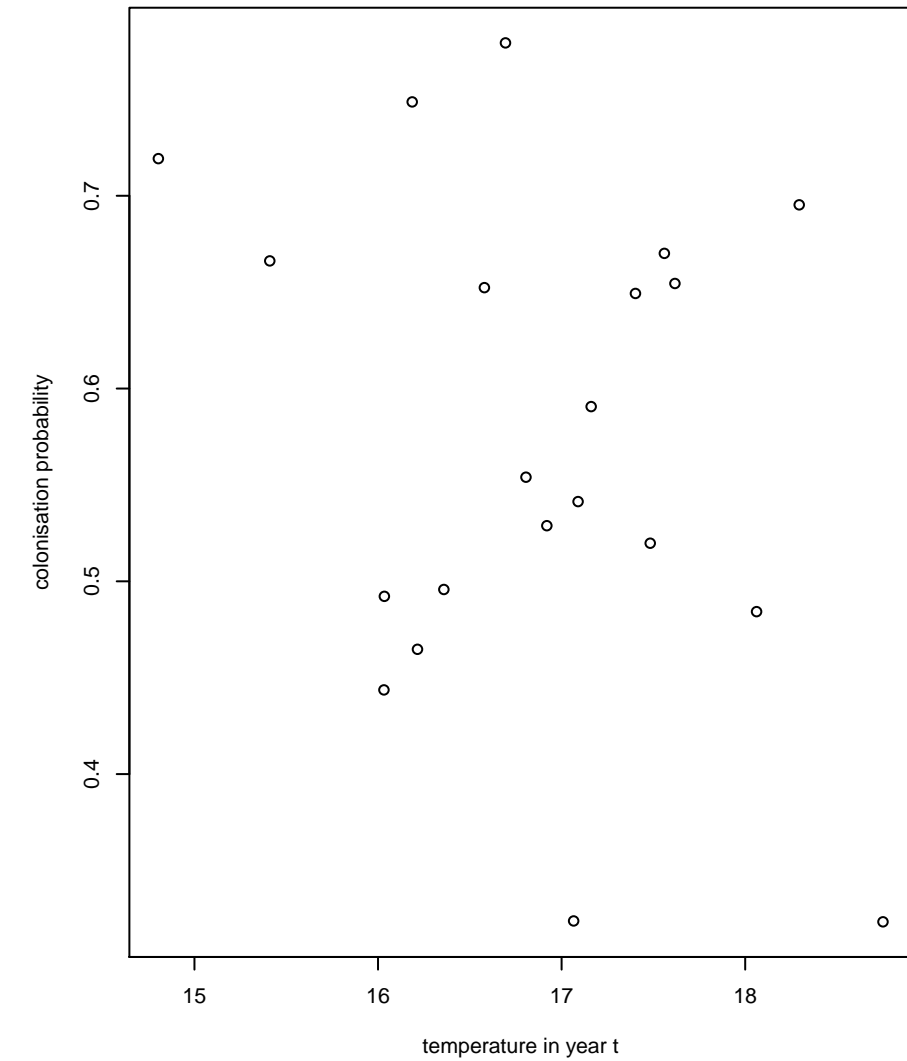

**Leptophyes punctatissima**

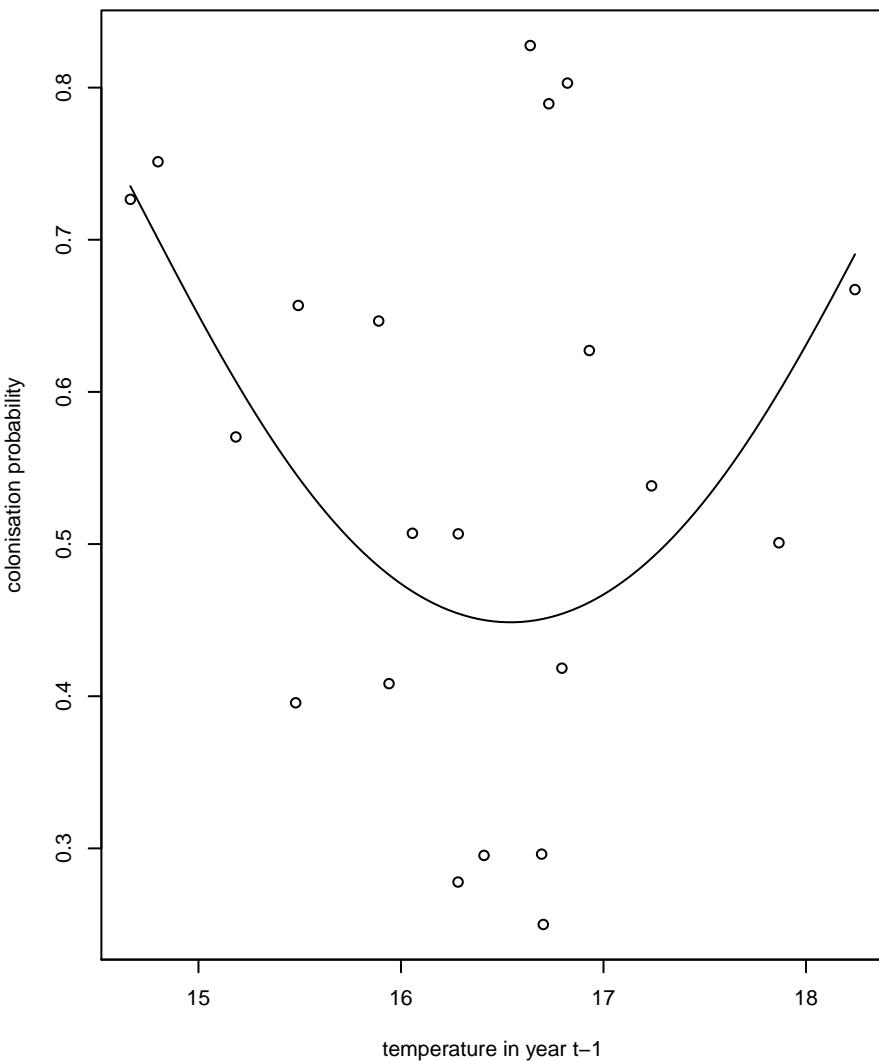

**Leptophyes punctatissima**

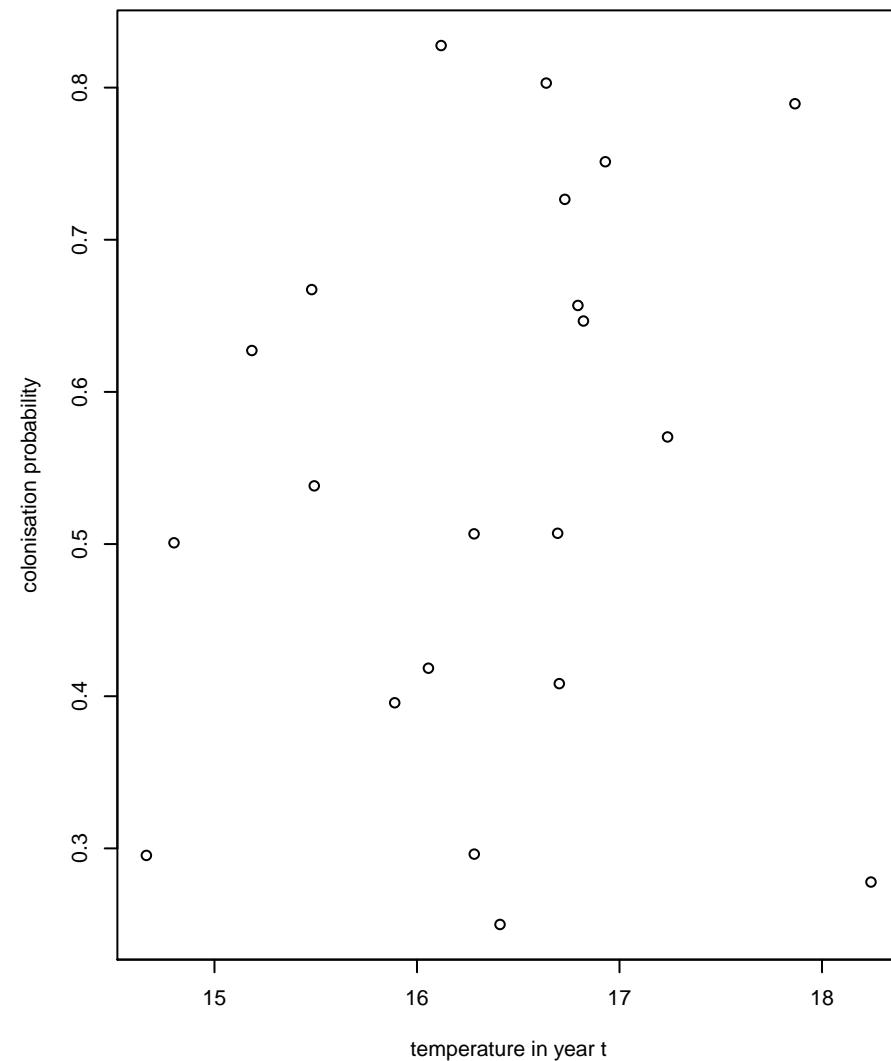

**Meconema meridionale**

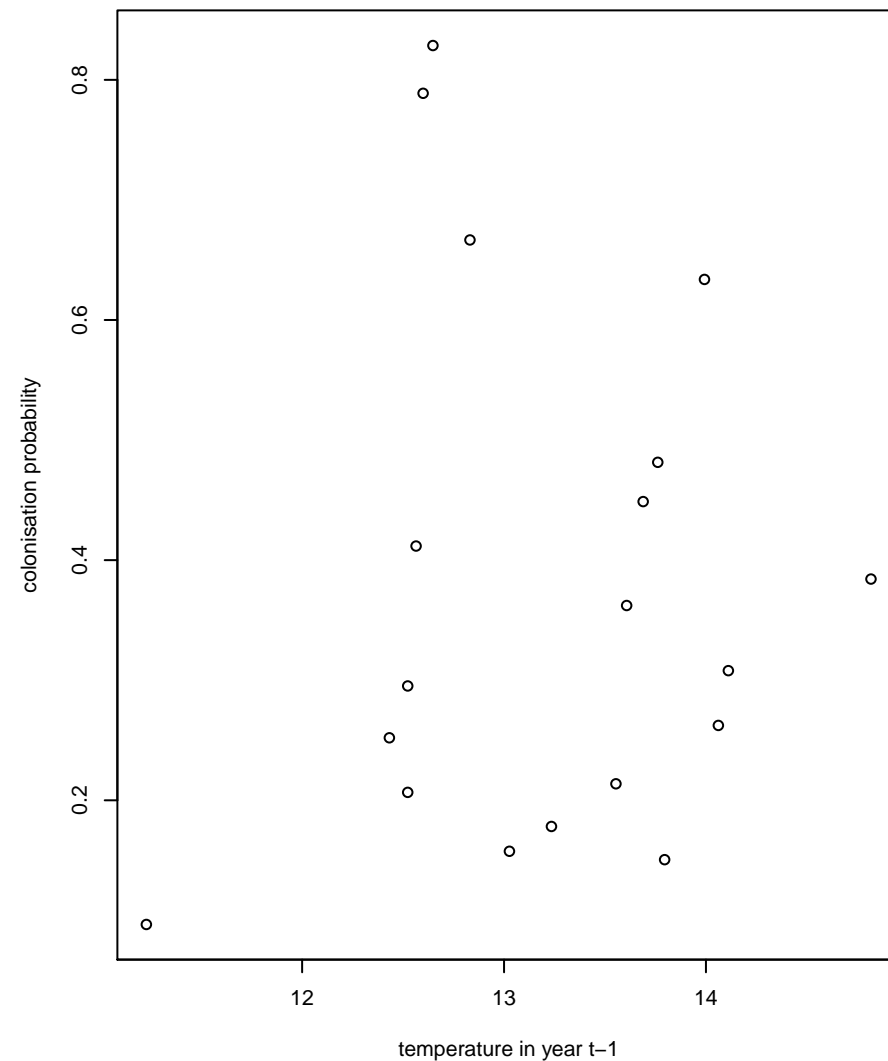

**Meconema meridionale**

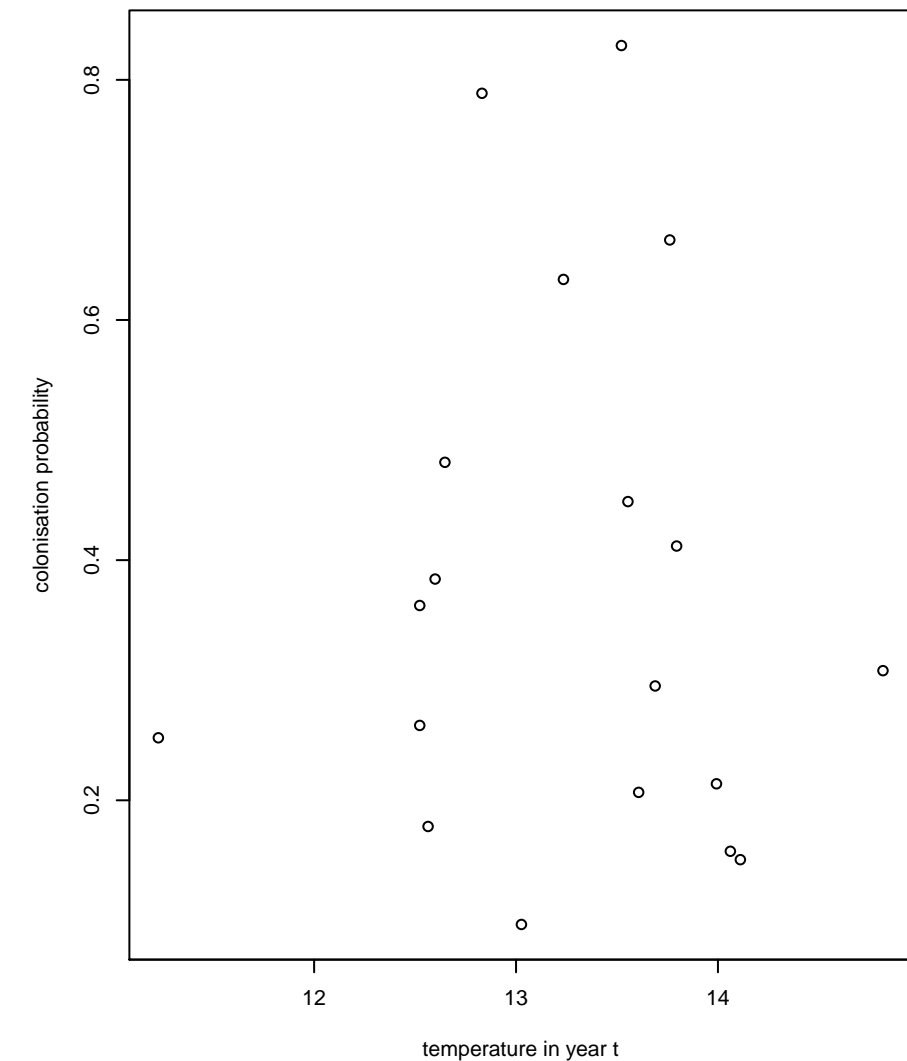

**Meconema thalassinum**

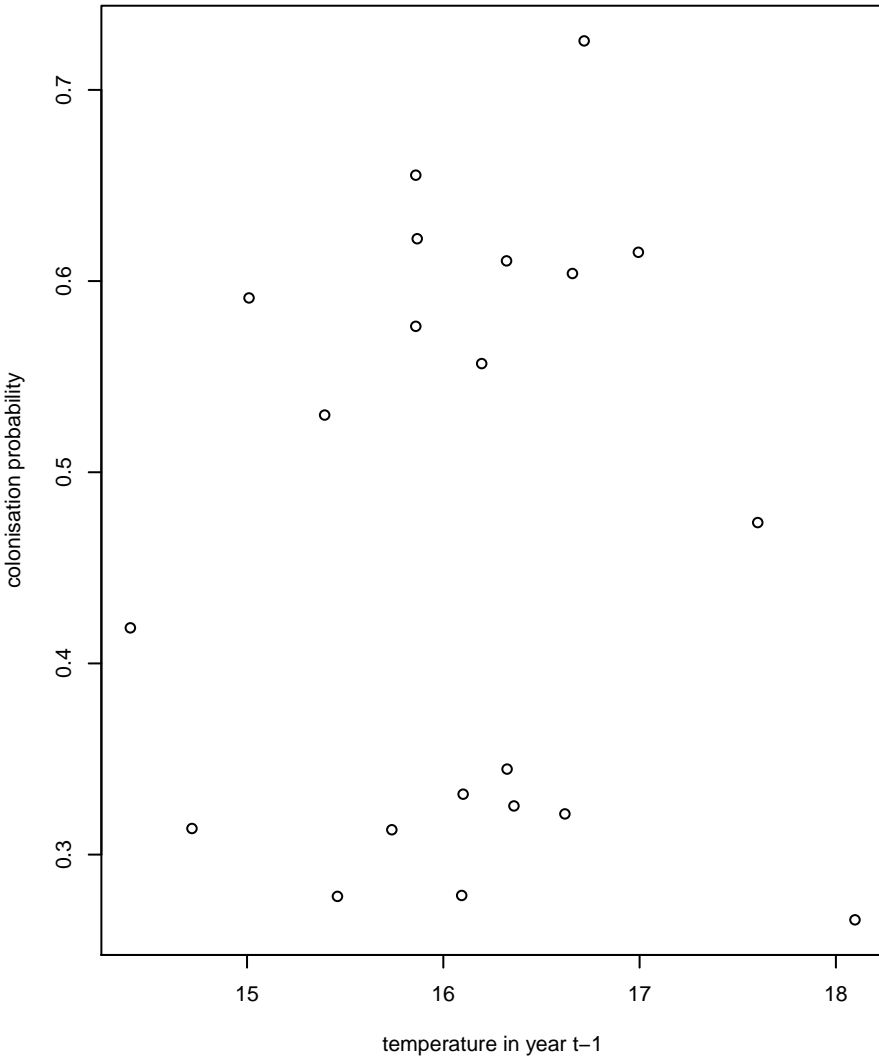

**Meconema thalassinum**

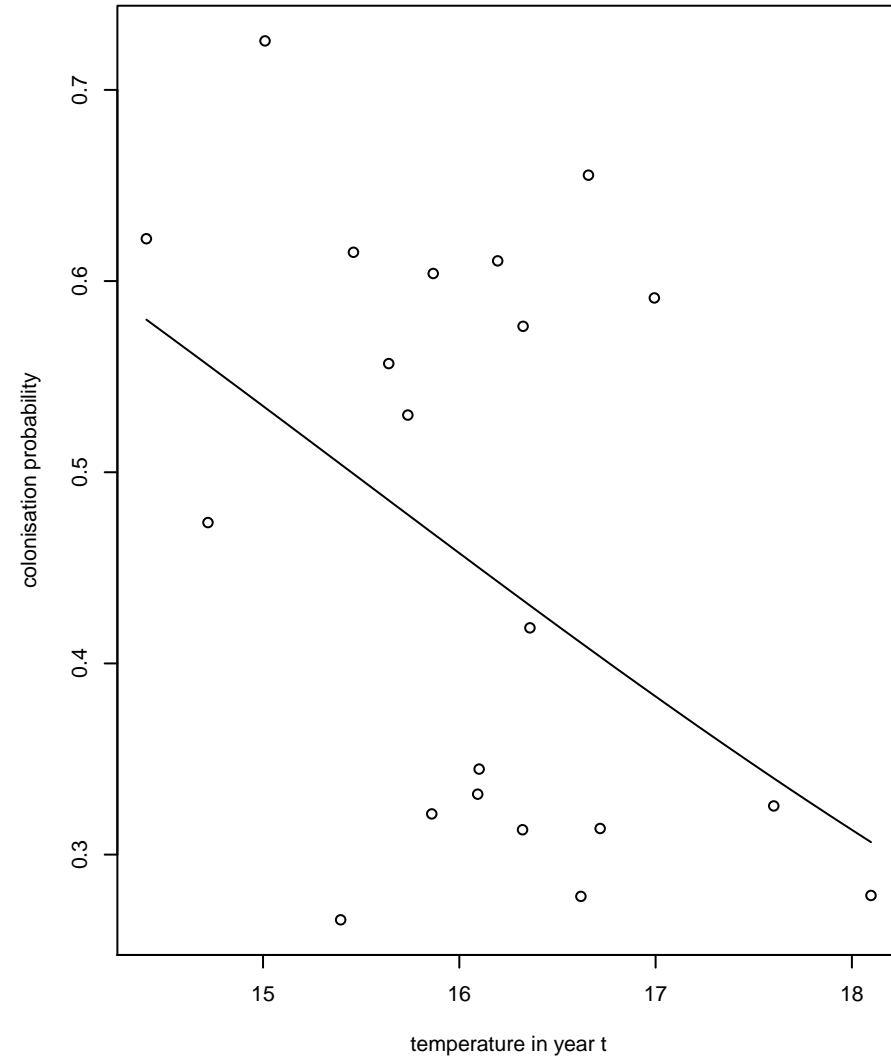

**Metrioptera brachyptera**

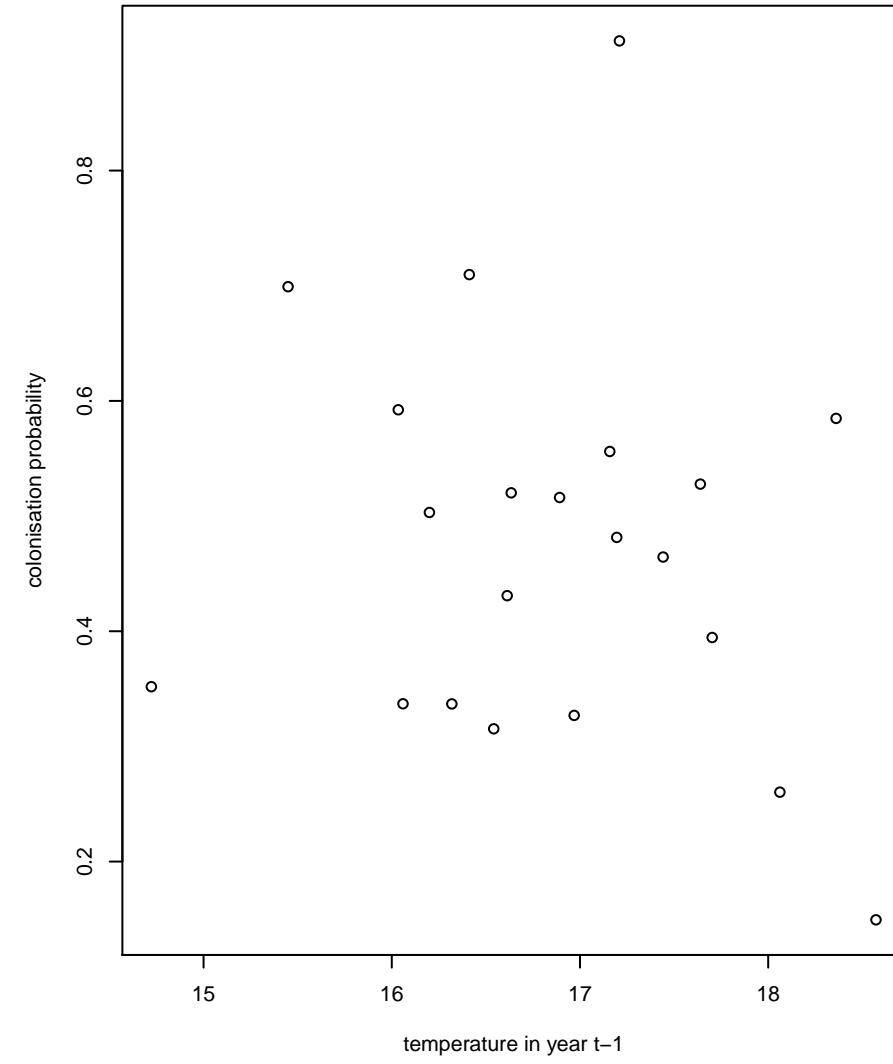

**Metrioptera brachyptera**

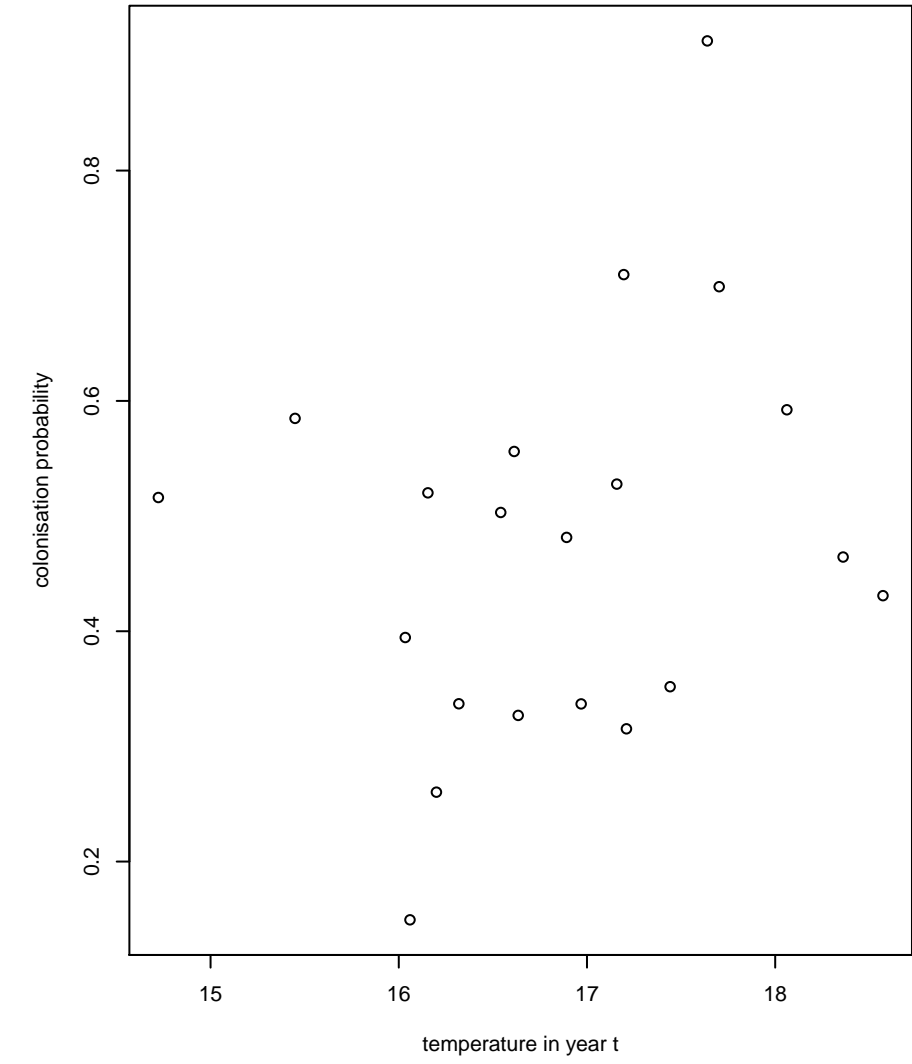

**Metrioptera roeselii**

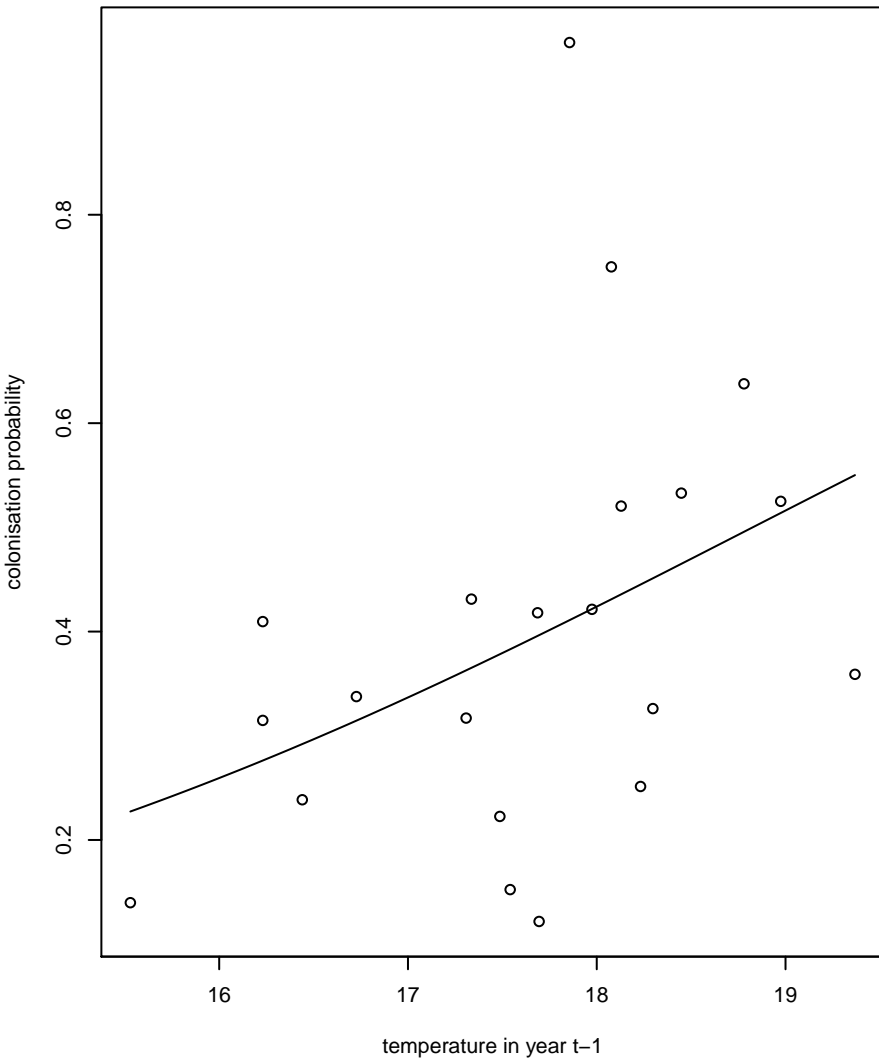

**Metrioptera roeselii**

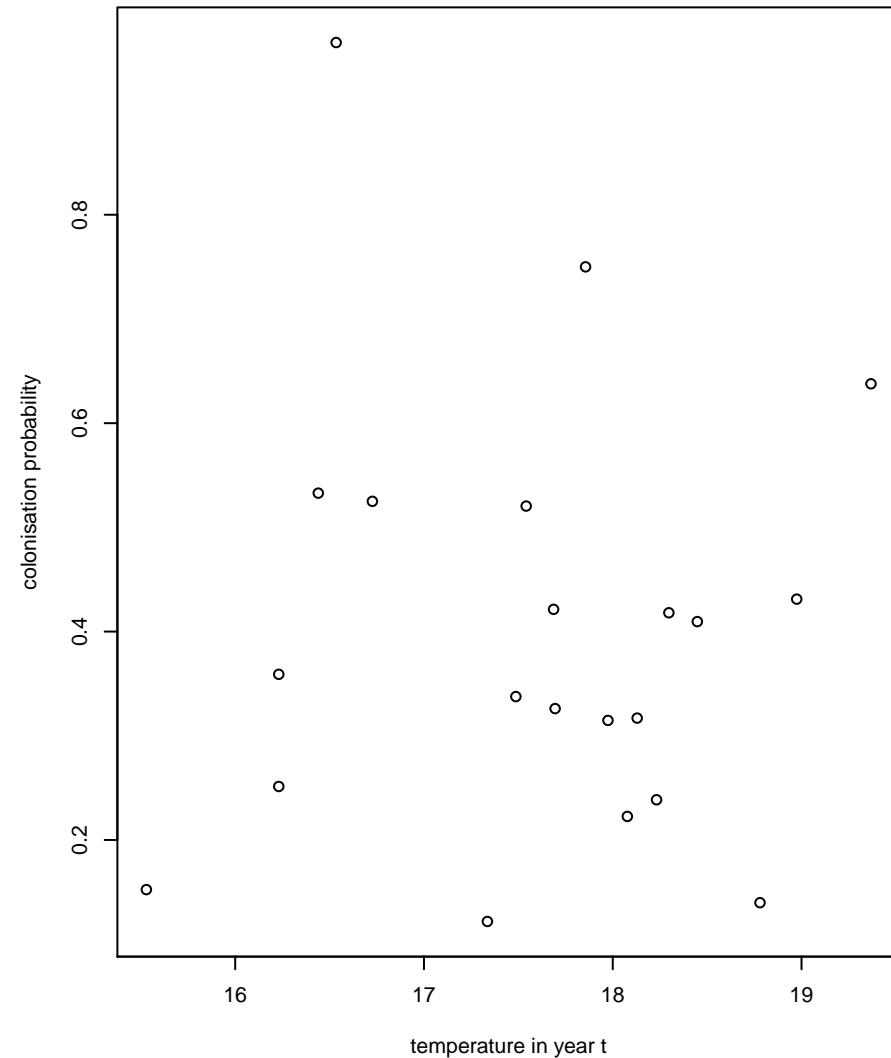

**Myrmeleotettix maculatus**

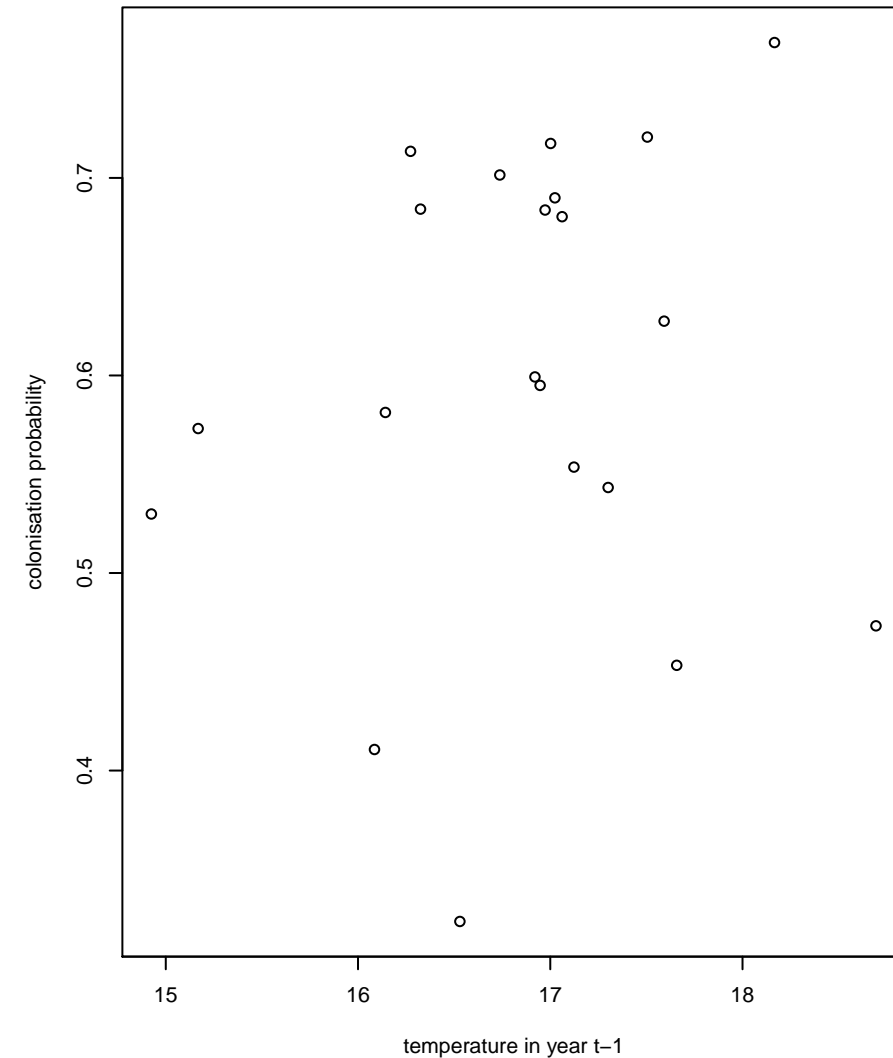

**Myrmeleotettix maculatus**

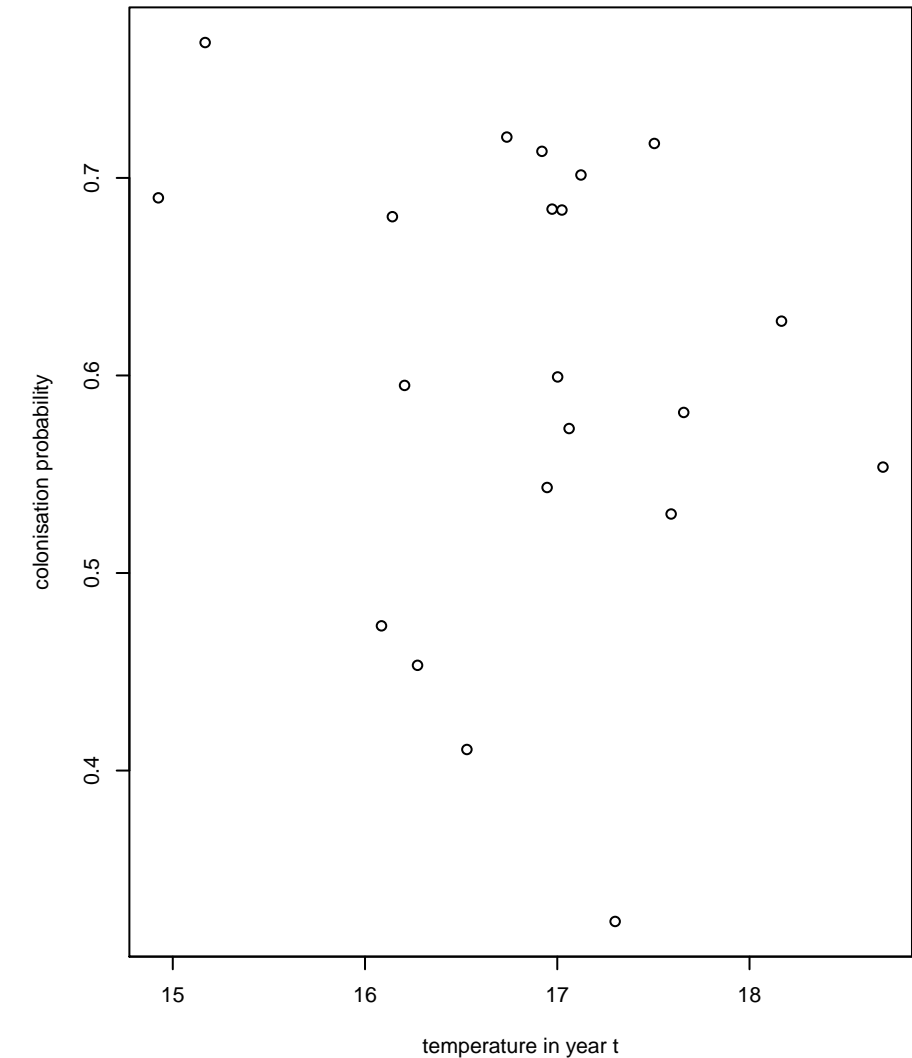

**Nemobius sylvestris**

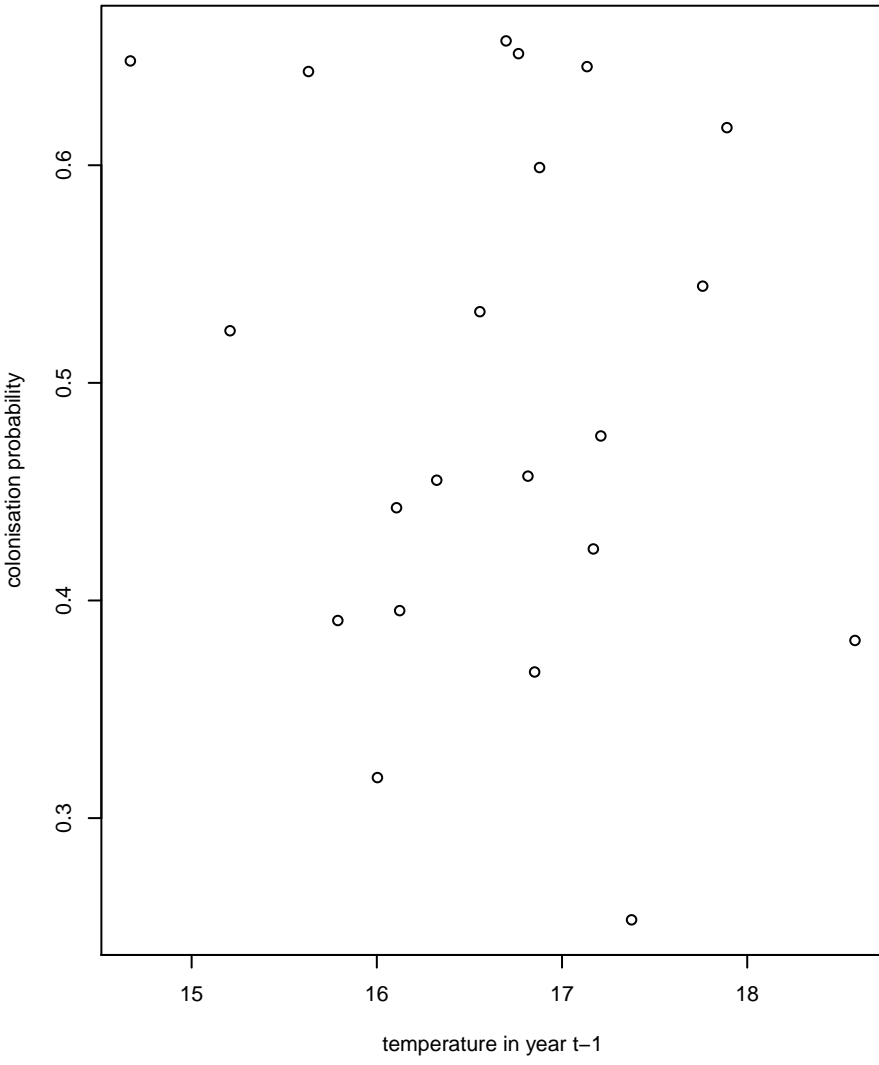

**Nemobius sylvestris**

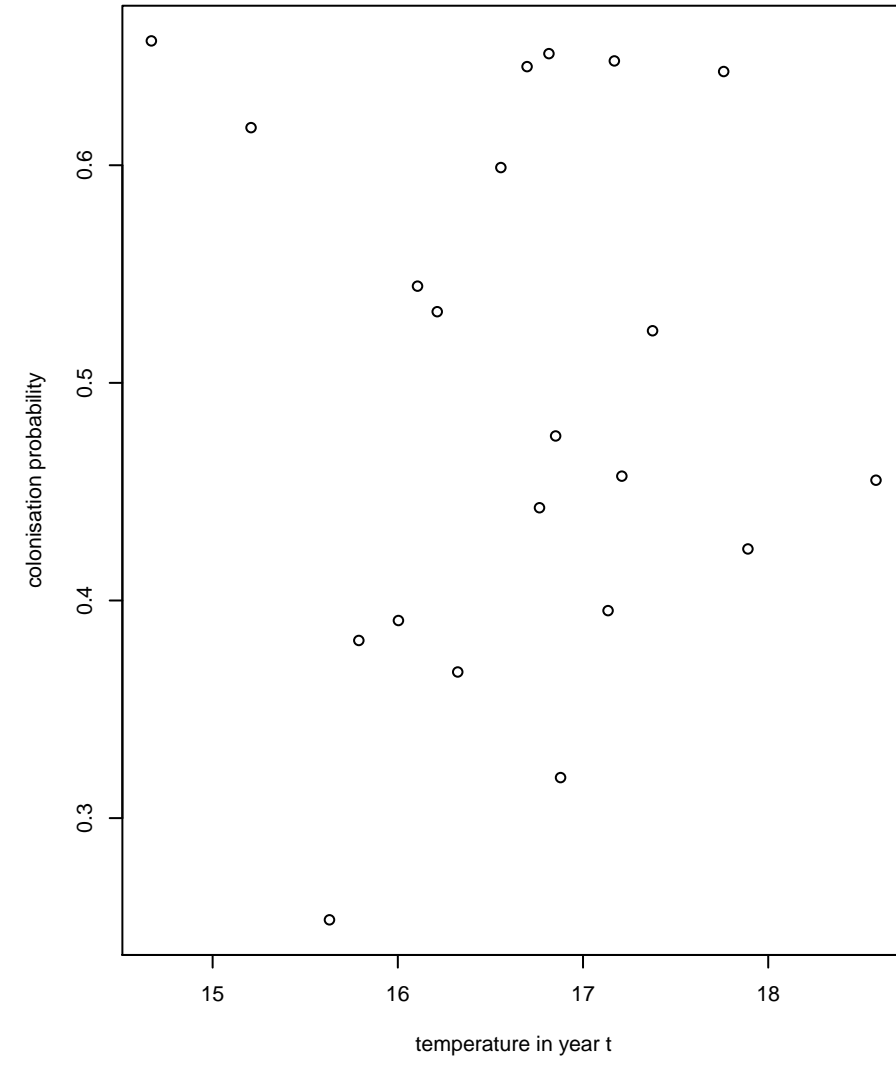

**Oedipoda caerulescens**

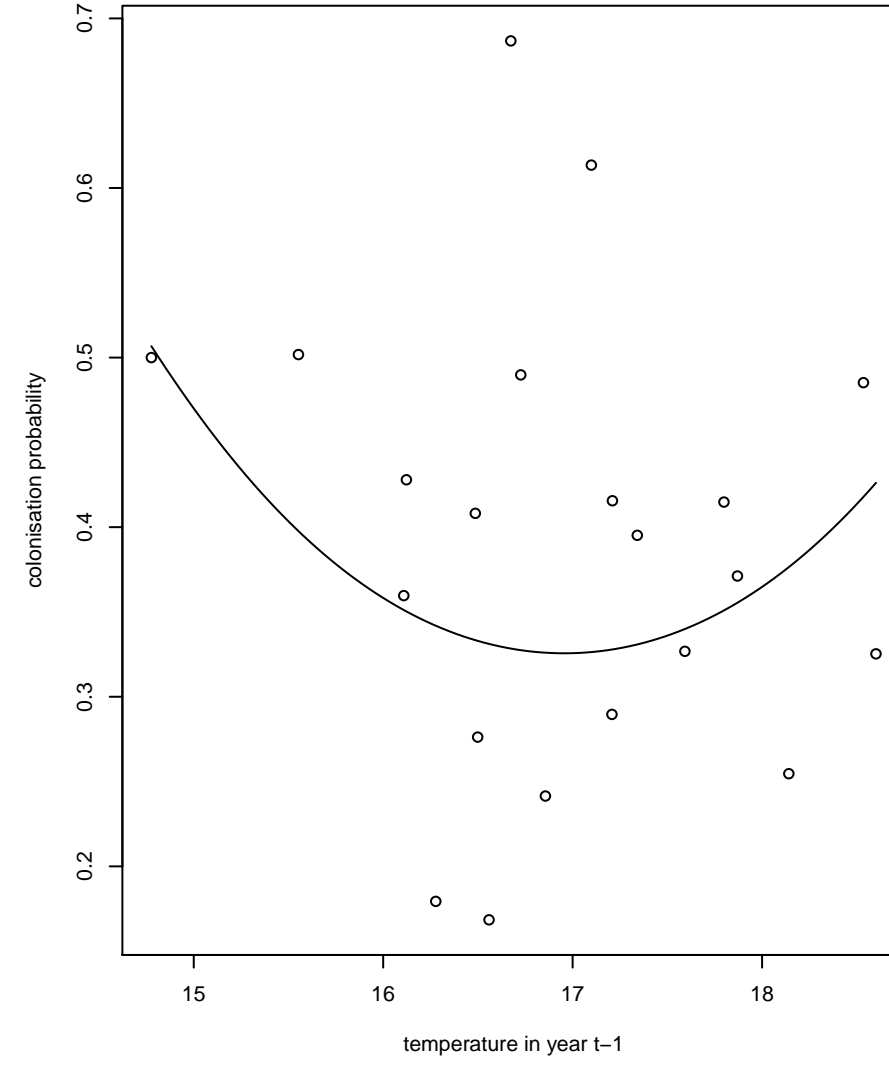

**Oedipoda caerulescens**

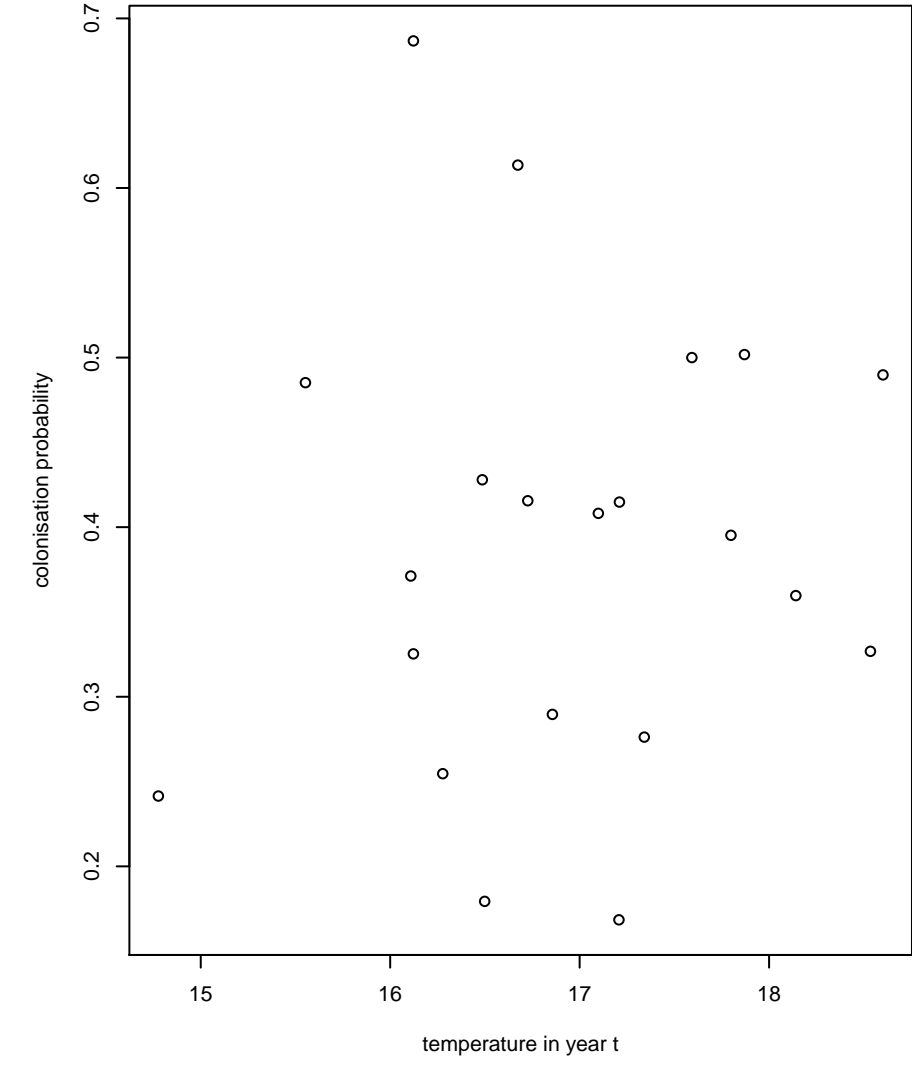

**Omocestus rufipes**

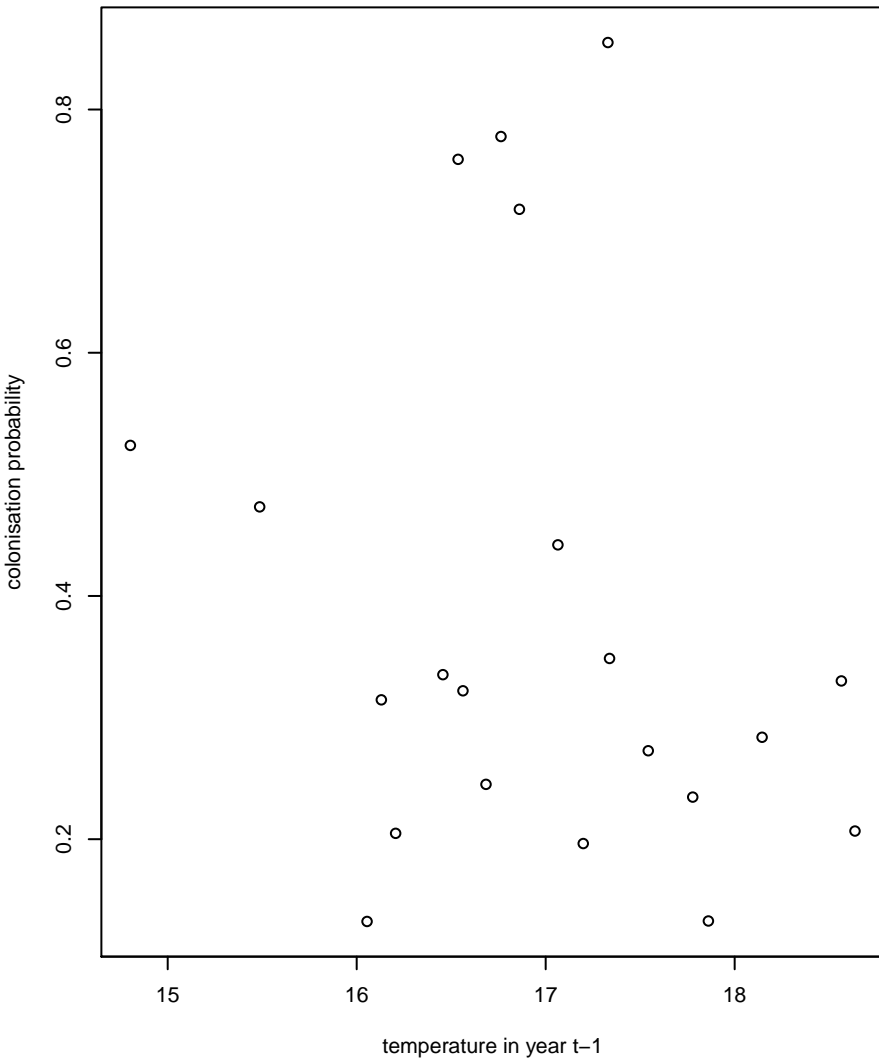

**Omocestus rufipes**

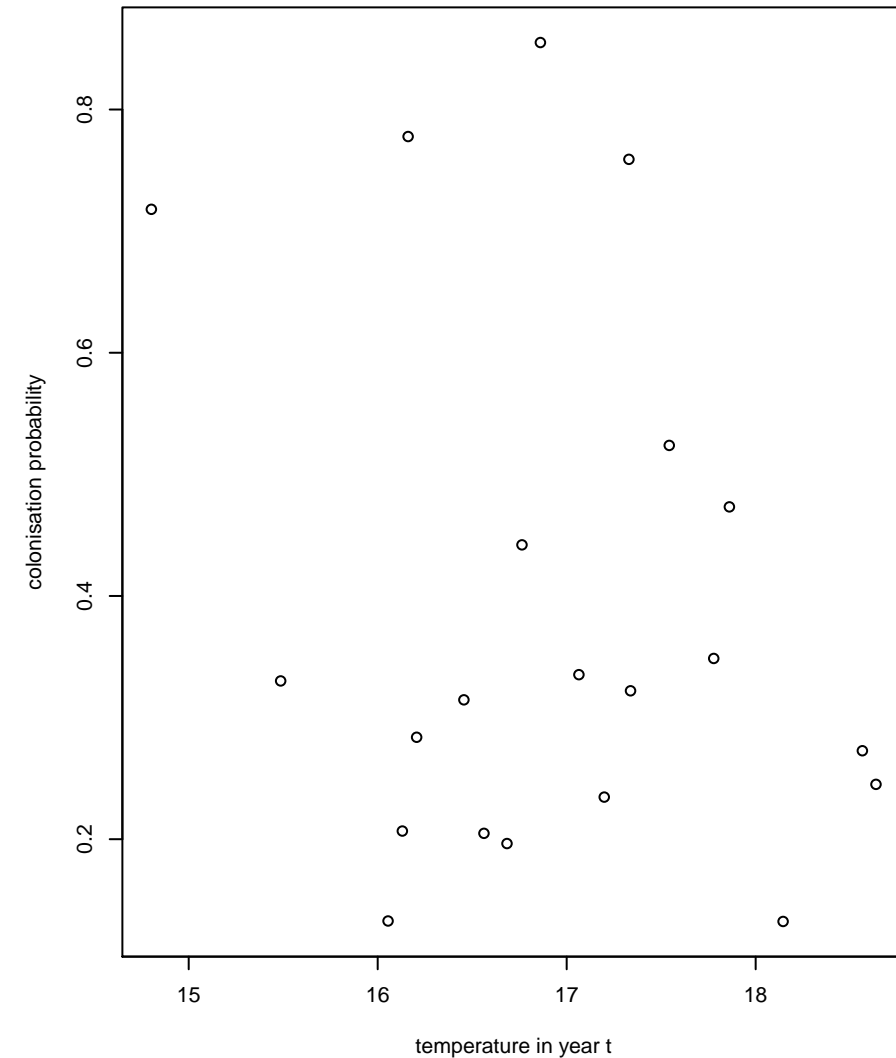

**Omocestus viridulus**

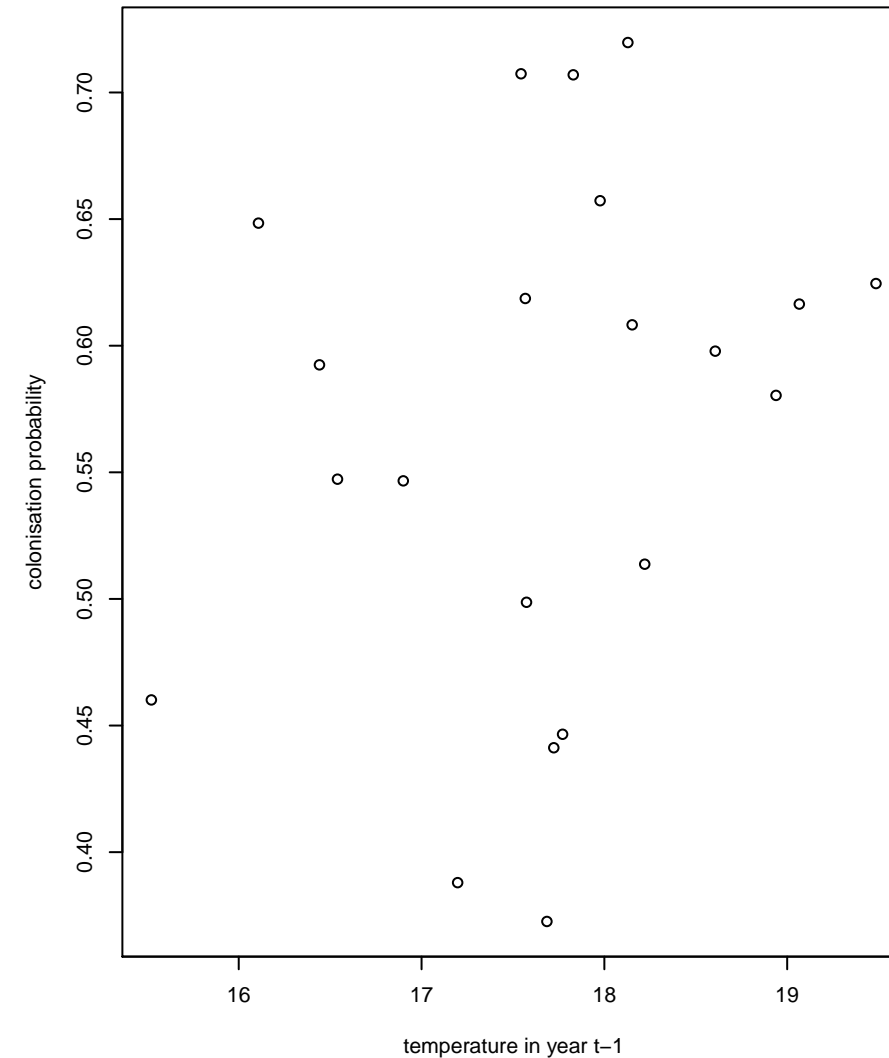

**Omocestus viridulus**

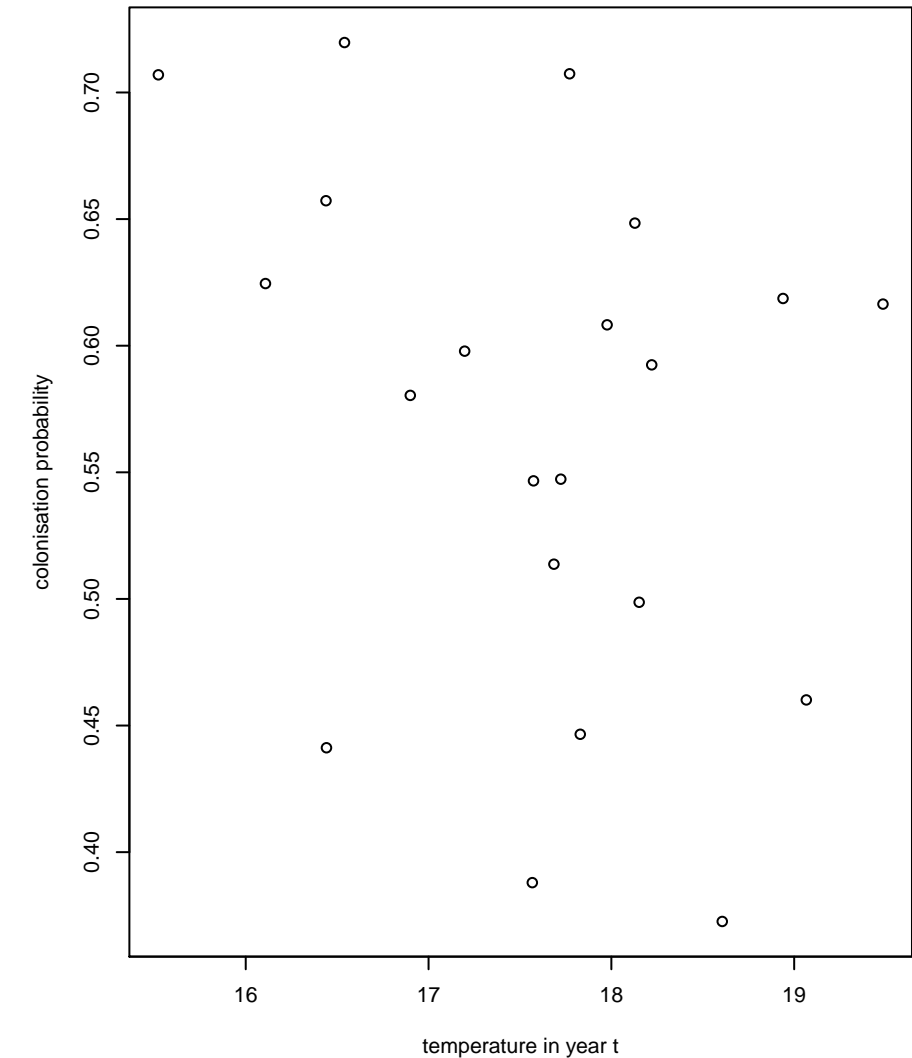

**Pholidoptera griseoptera**

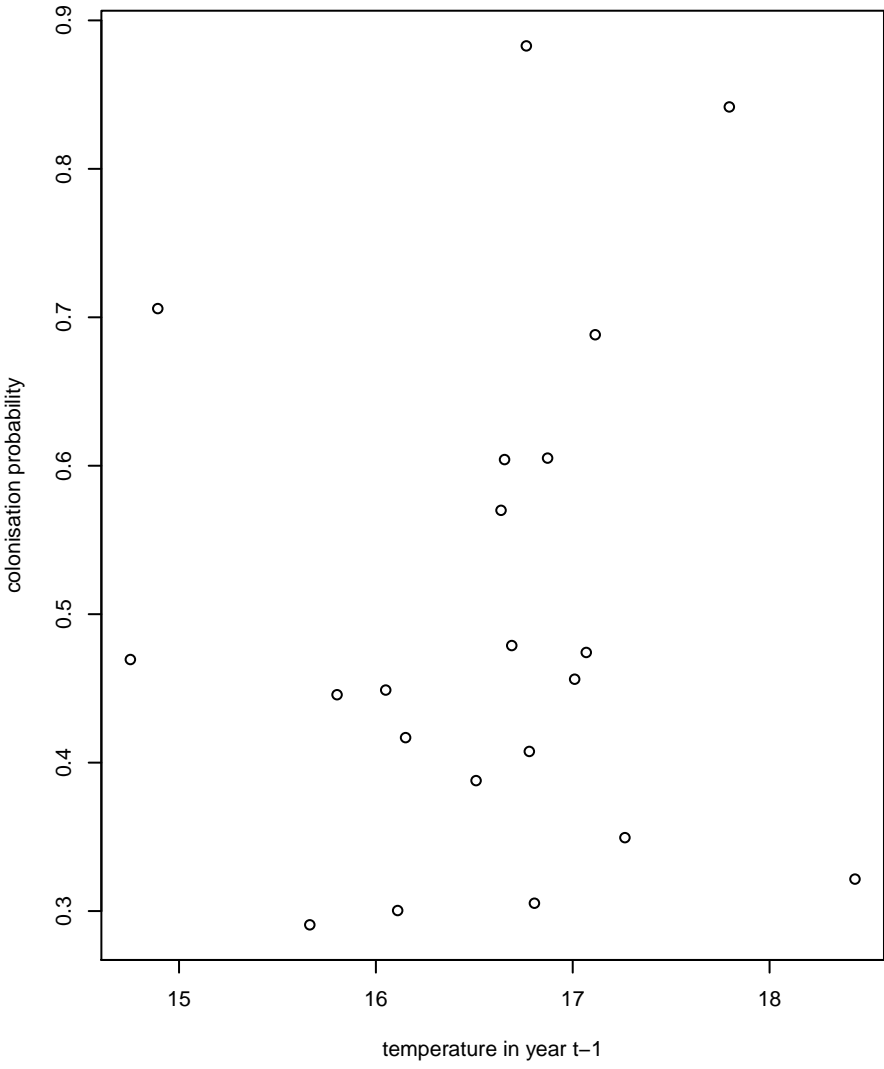

**Pholidoptera griseoptera**

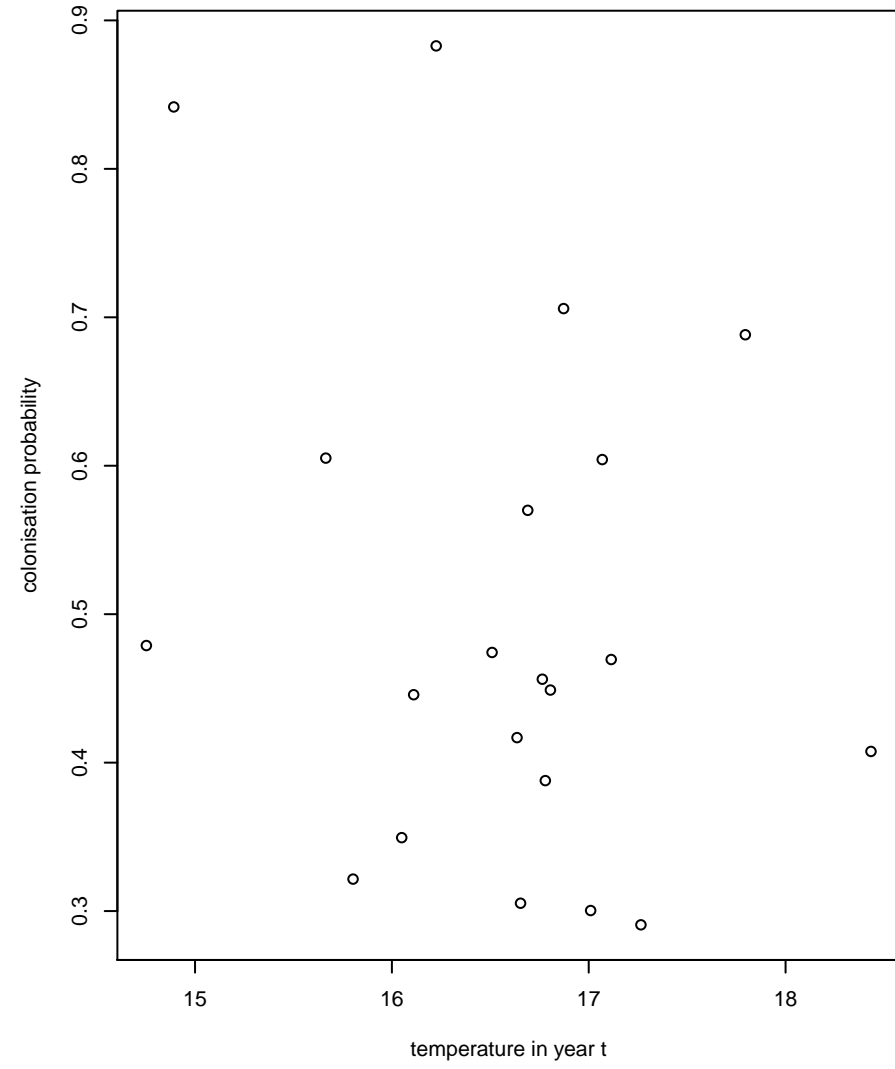

**Stenobothrus lineatus**

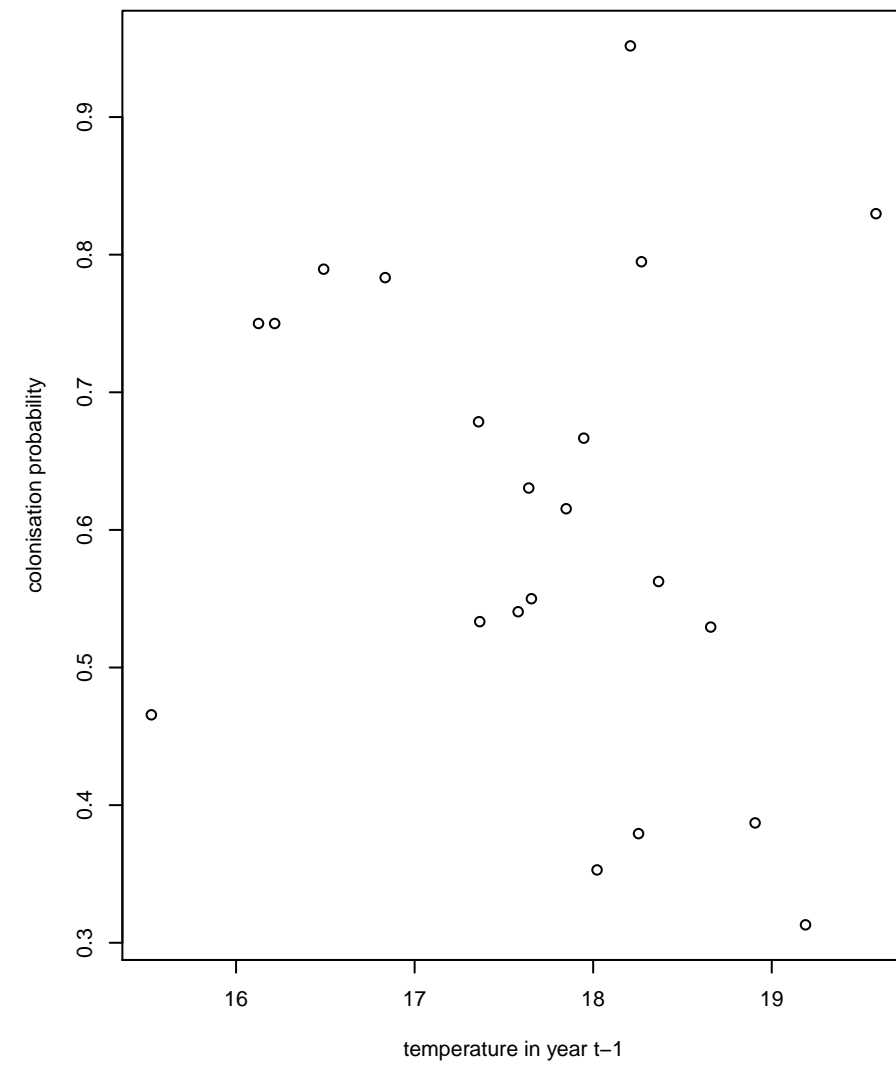

**Stenobothrus lineatus**

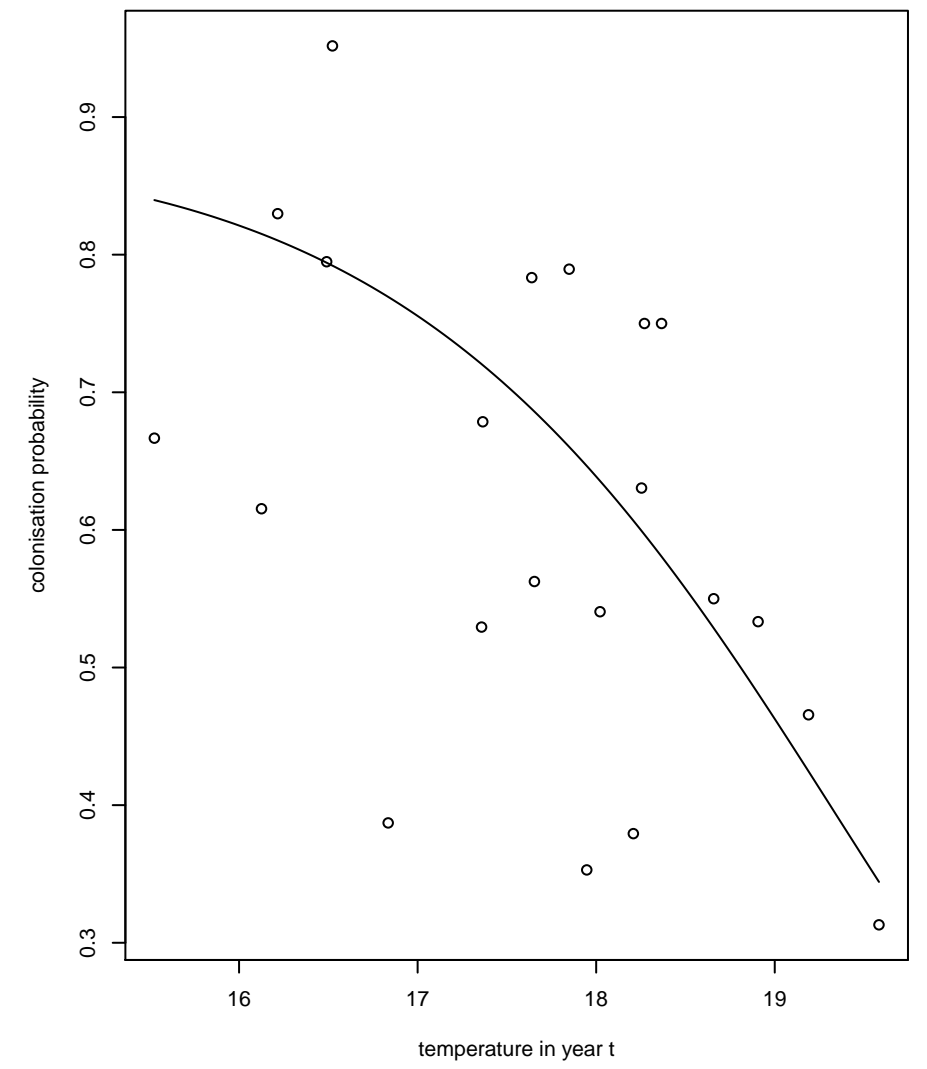

**Stenobothrus stigmaticus**

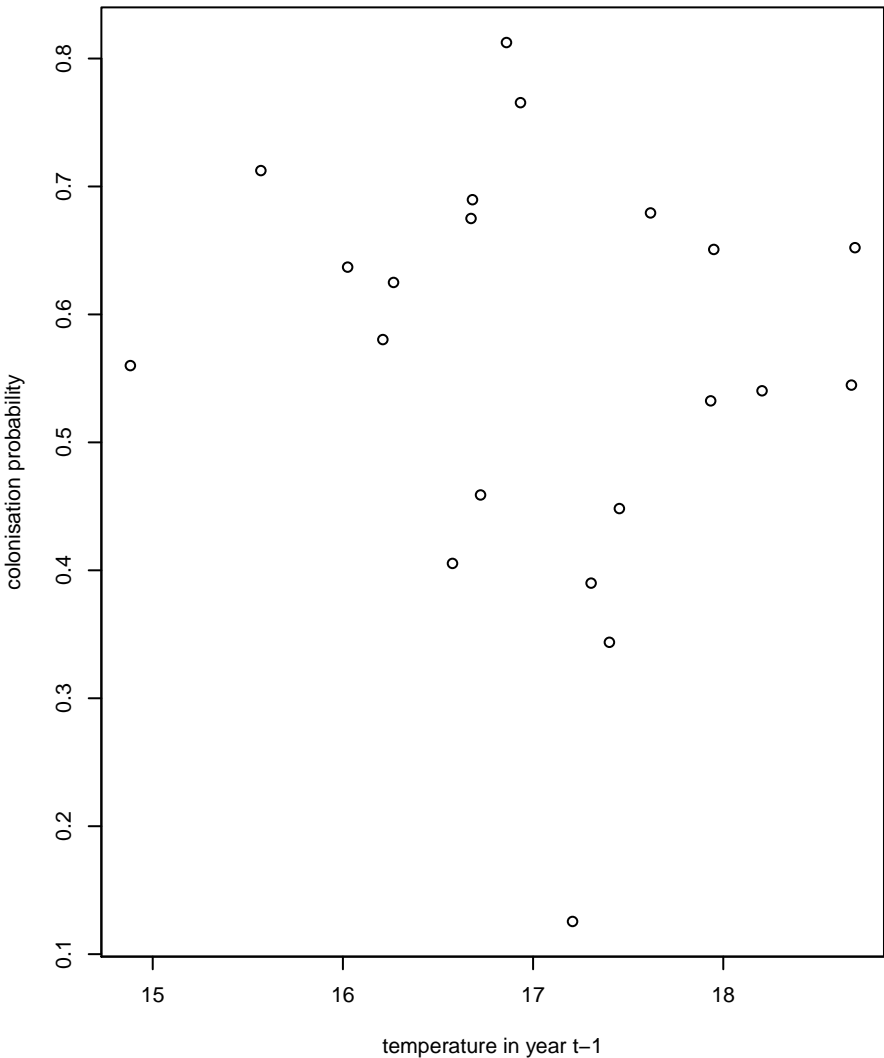

**Stenobothrus stigmaticus**

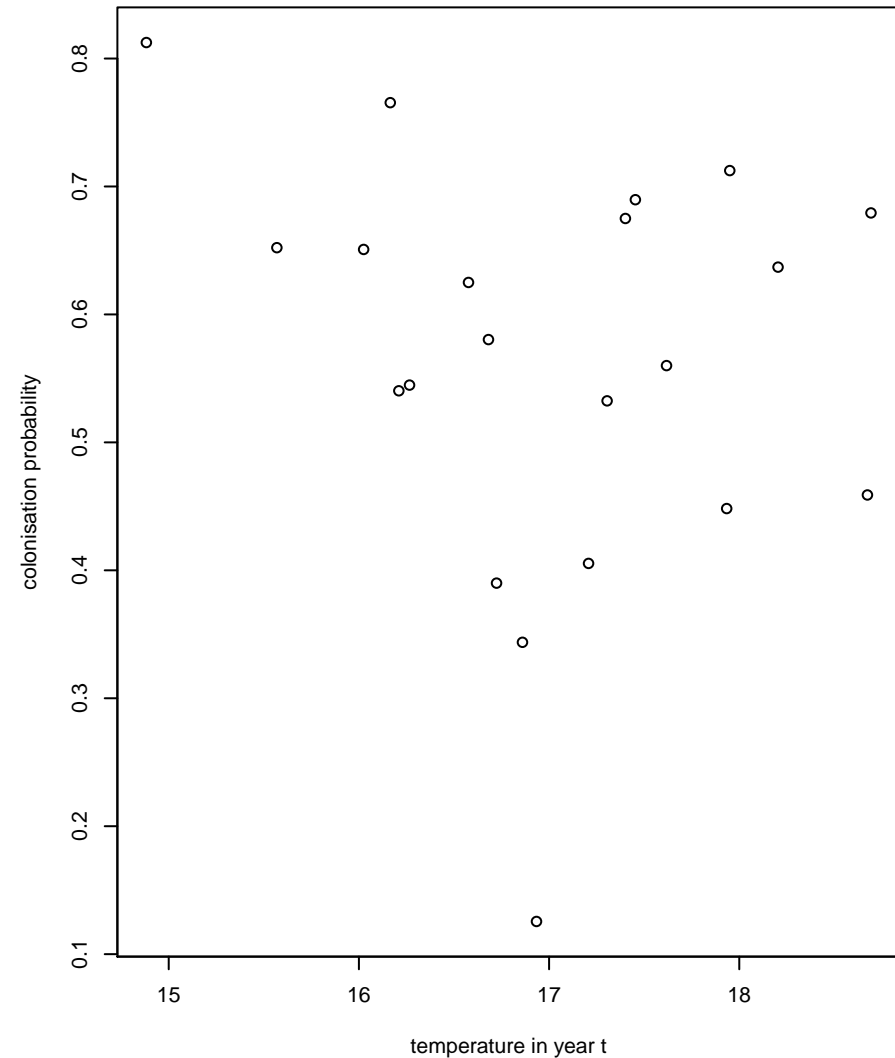

**Stethophyma grossum**

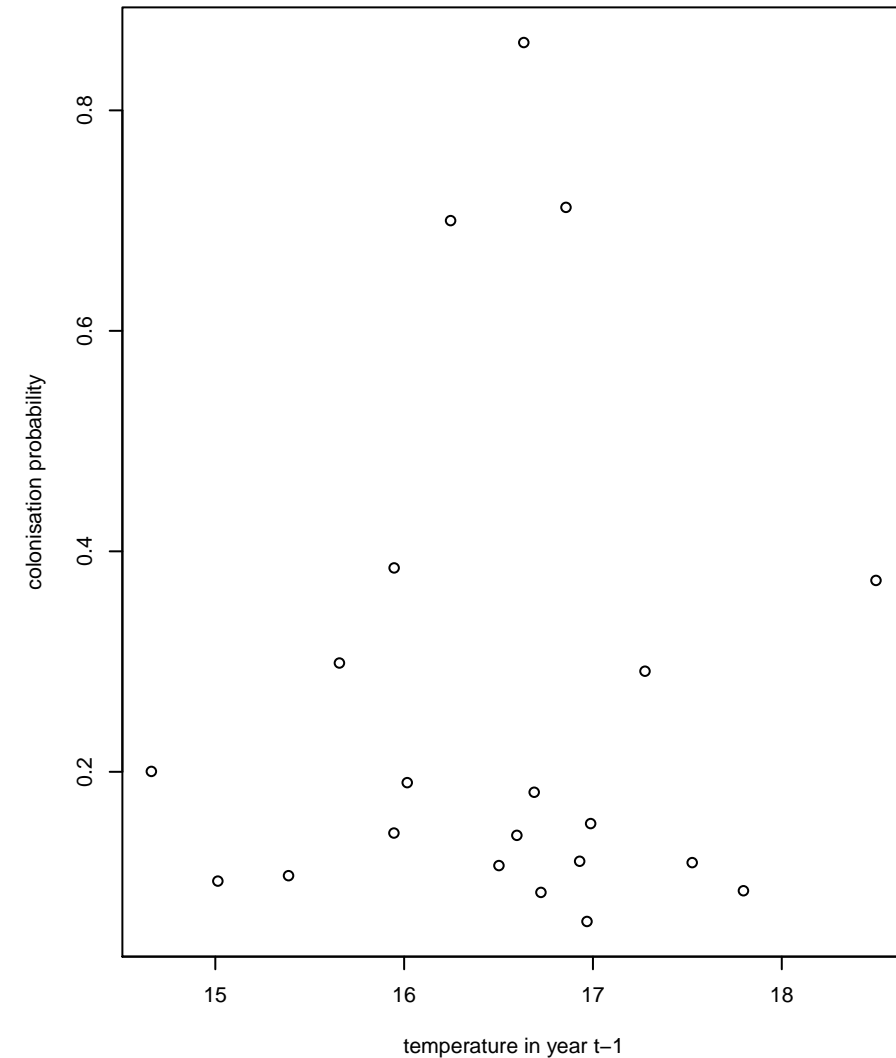

**Stethophyma grossum**

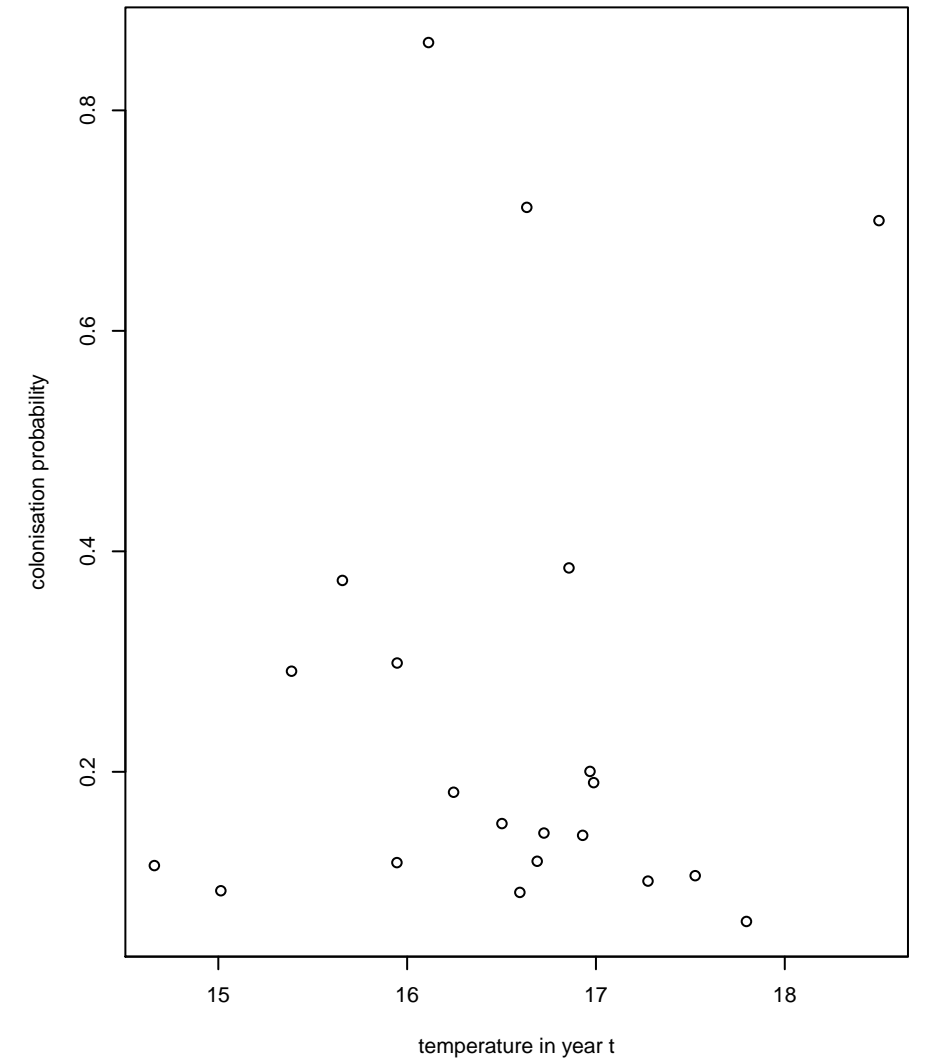

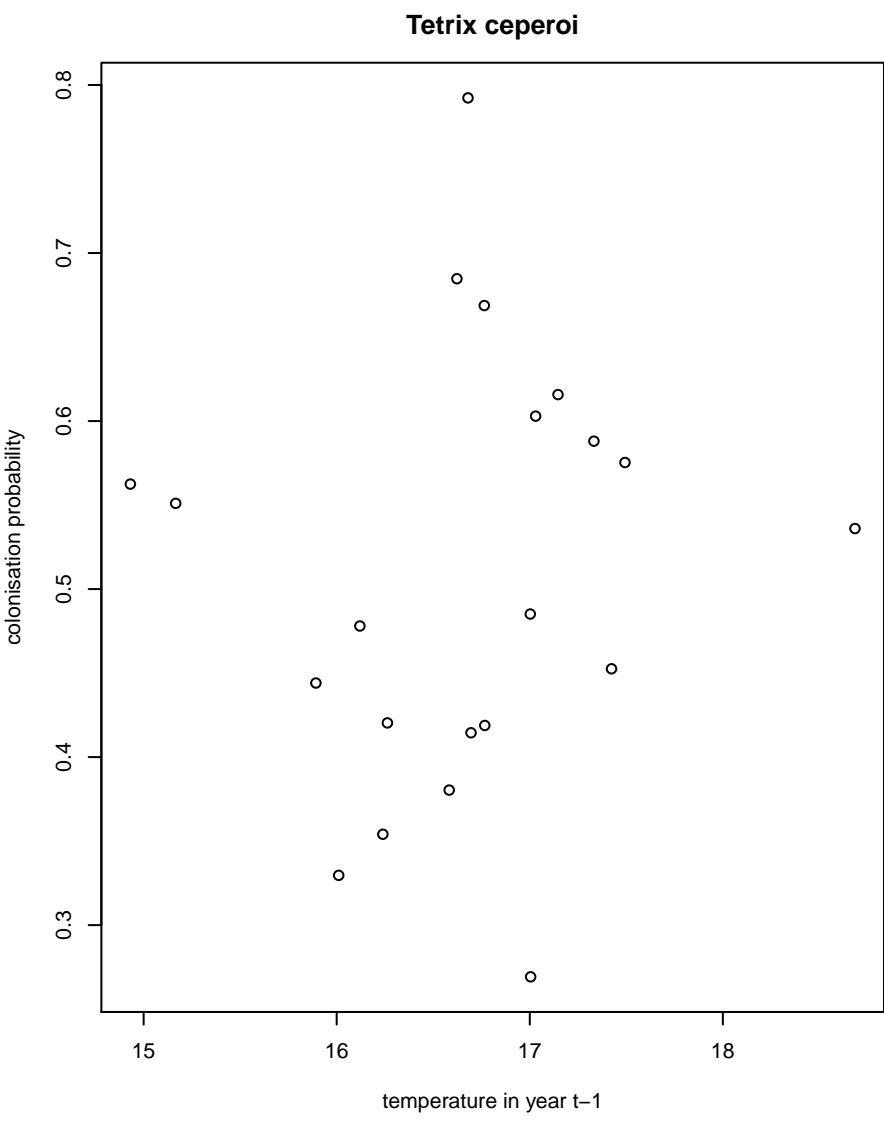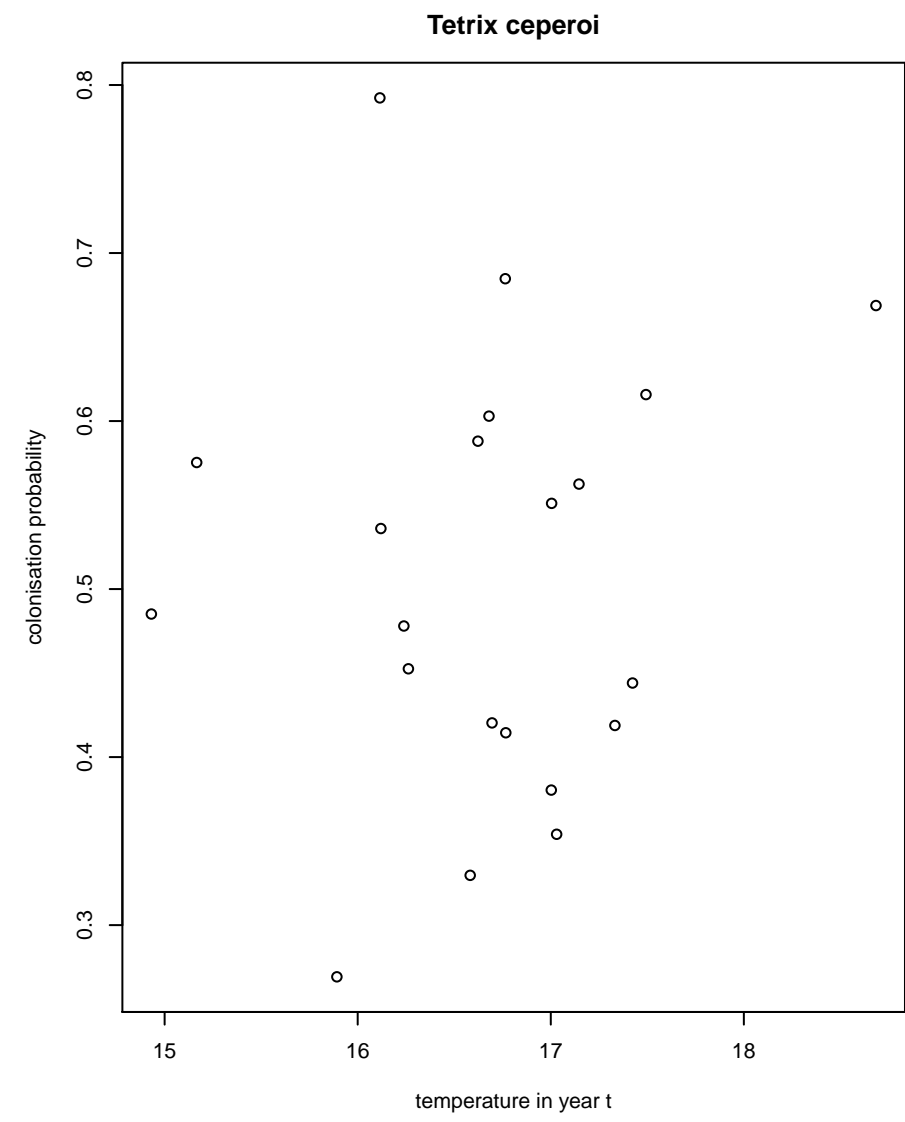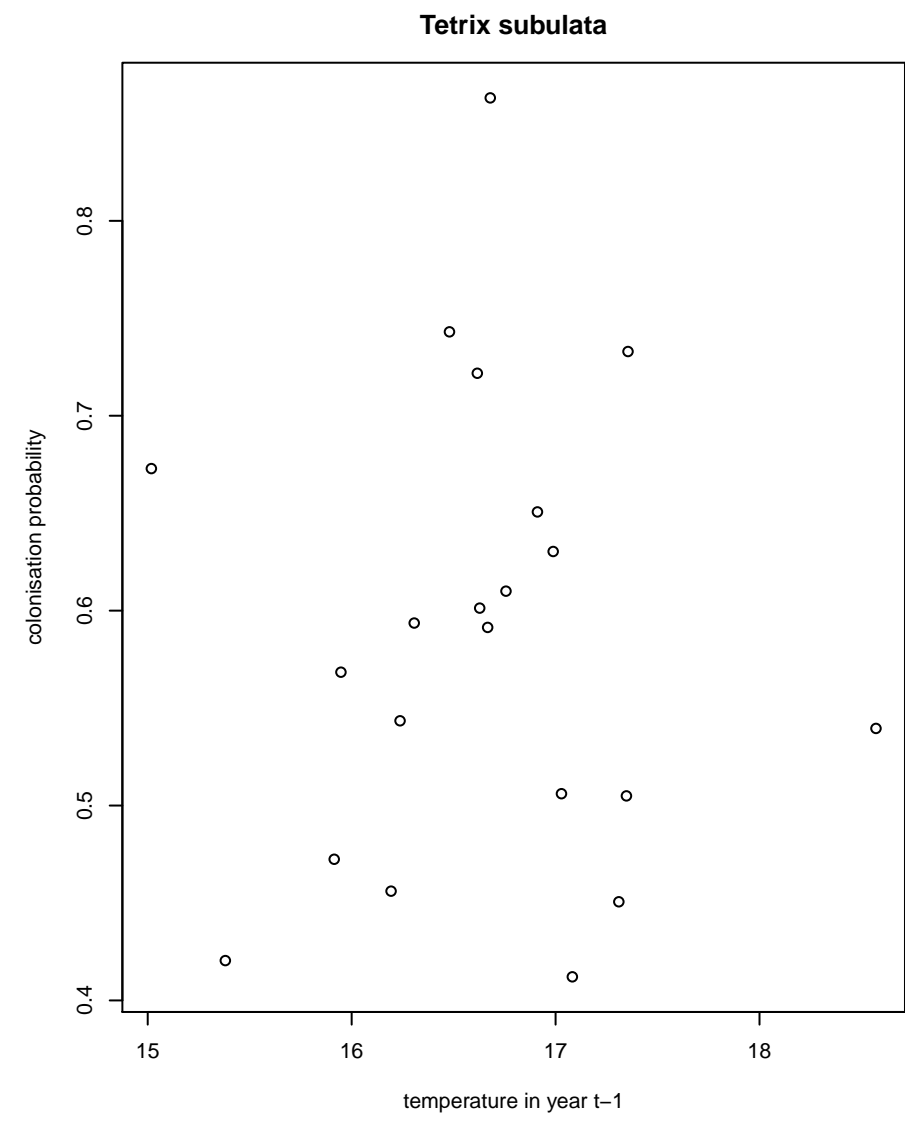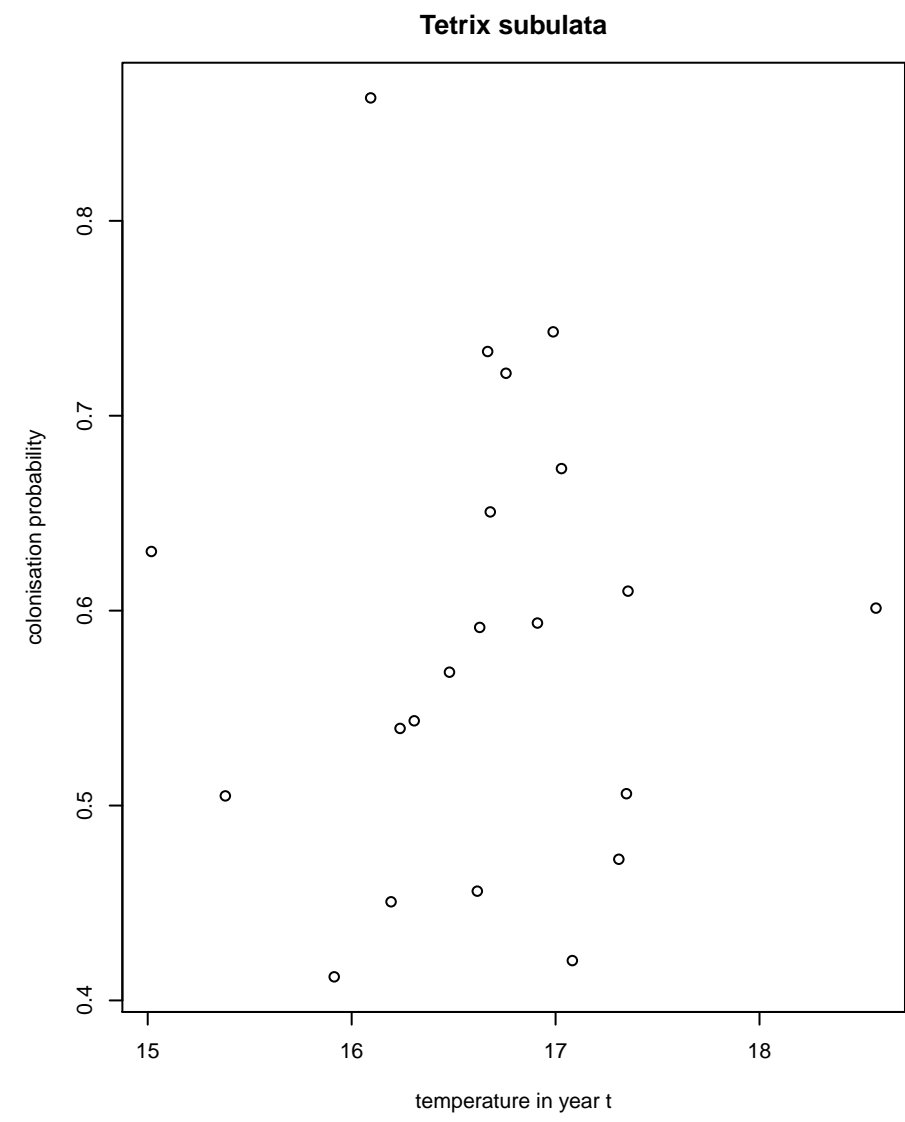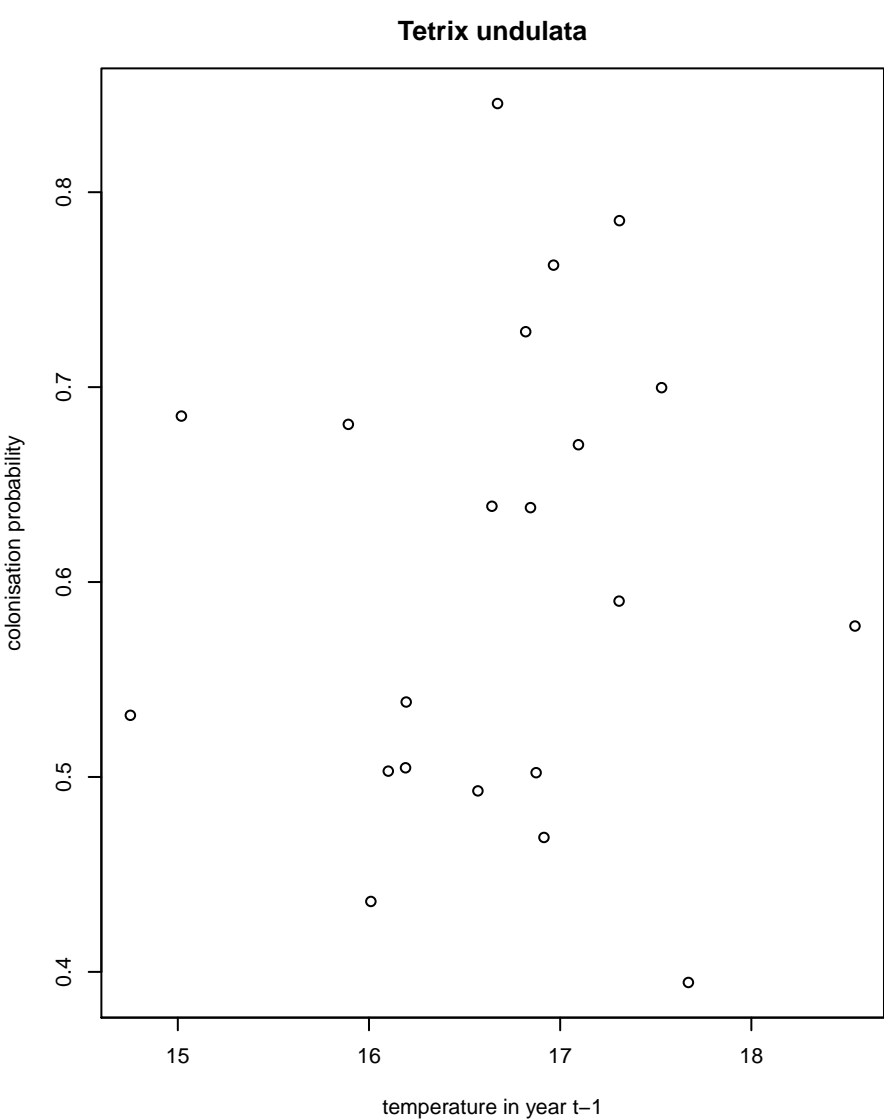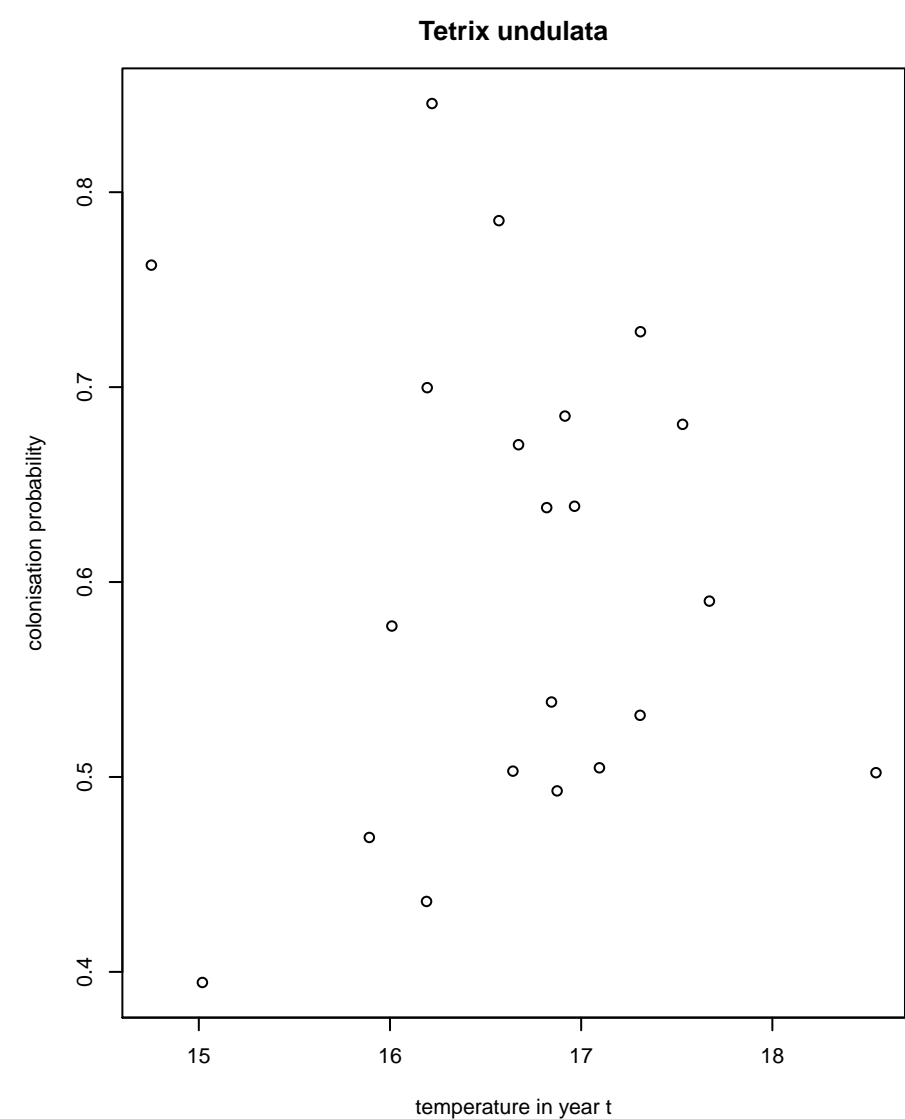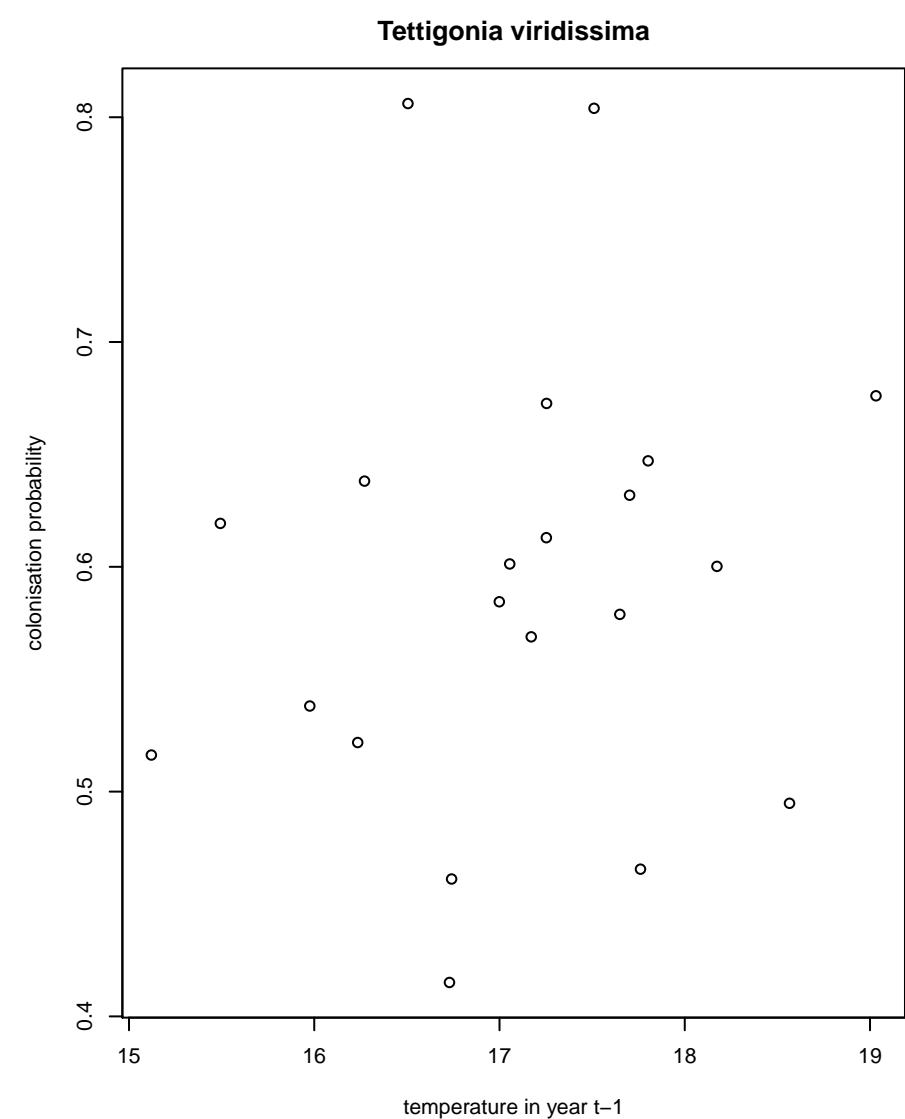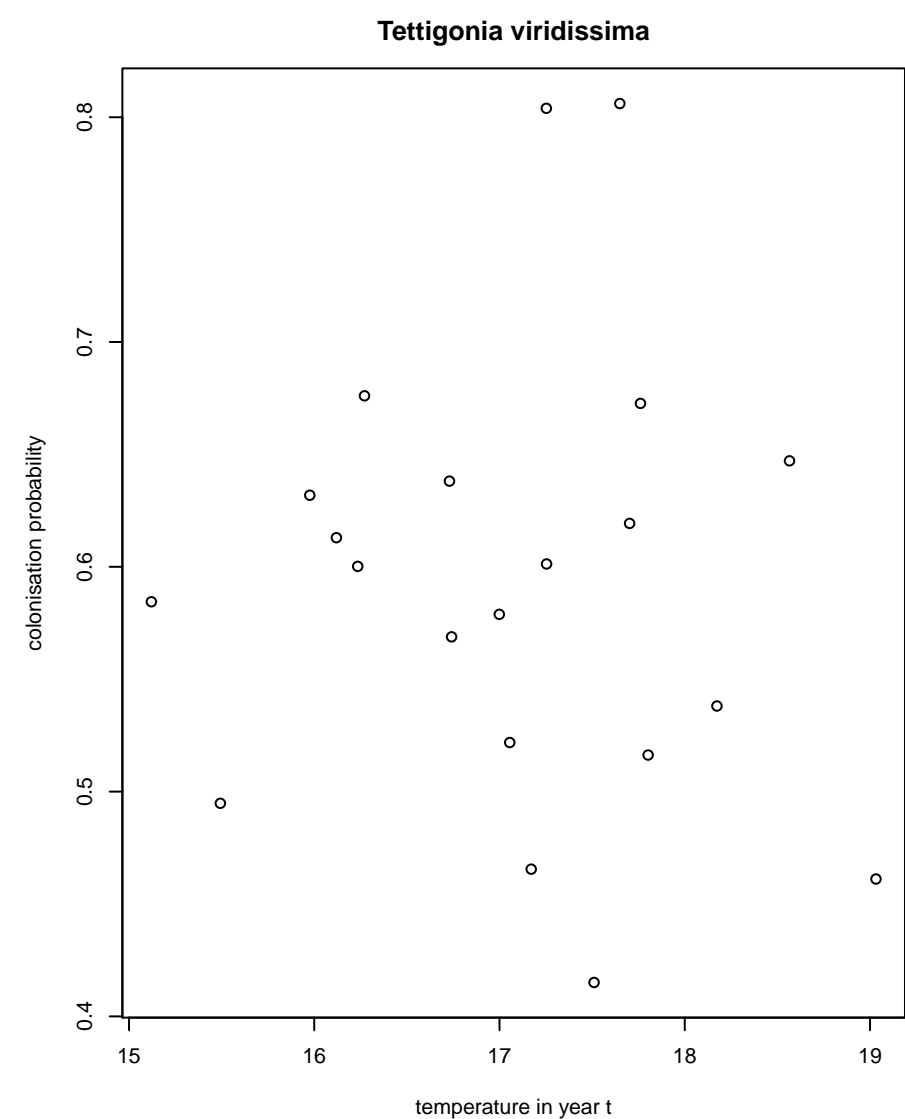



**Coenagrion puella**

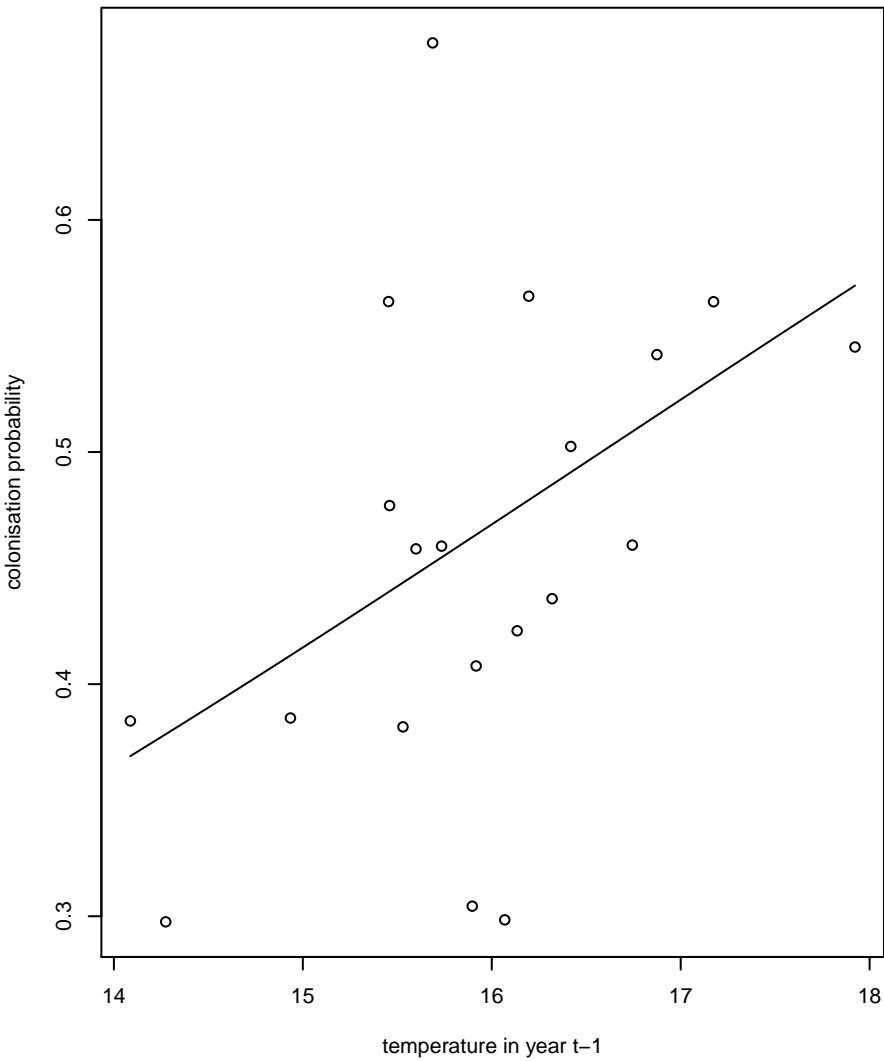

**Coenagrion puella**

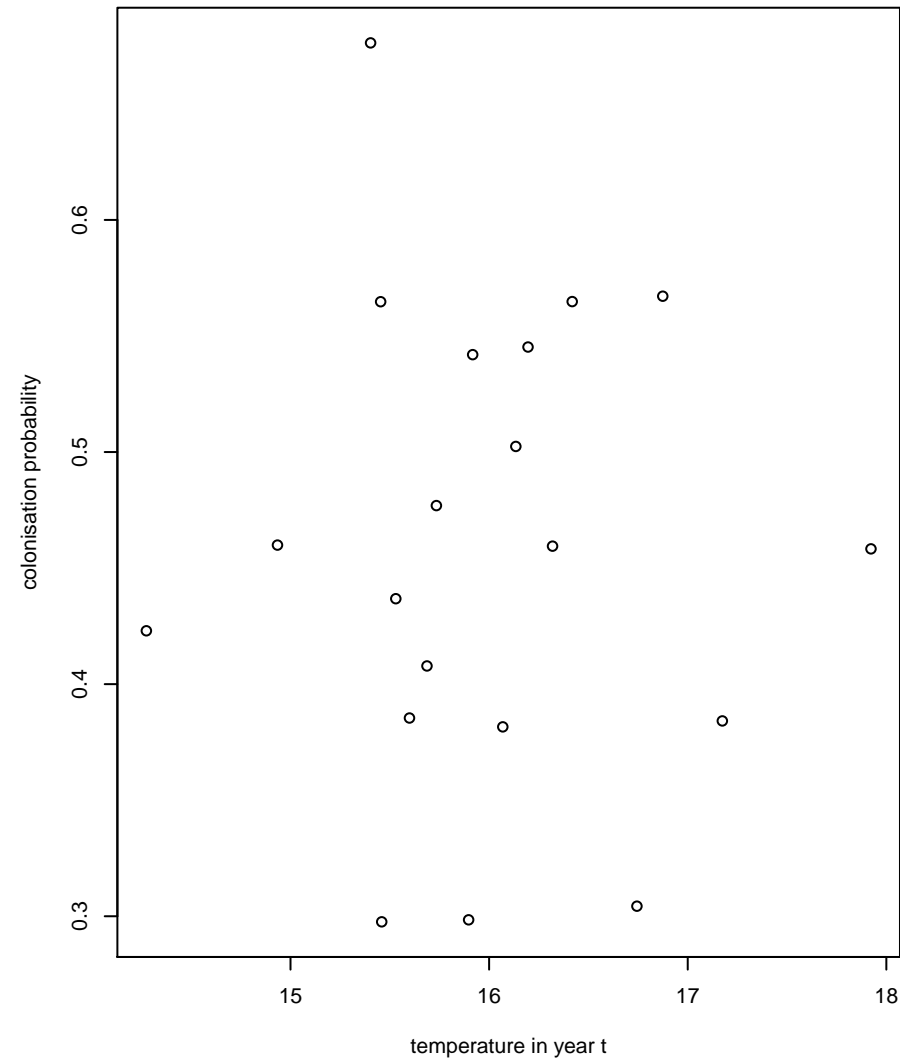

**Erythromma najas**

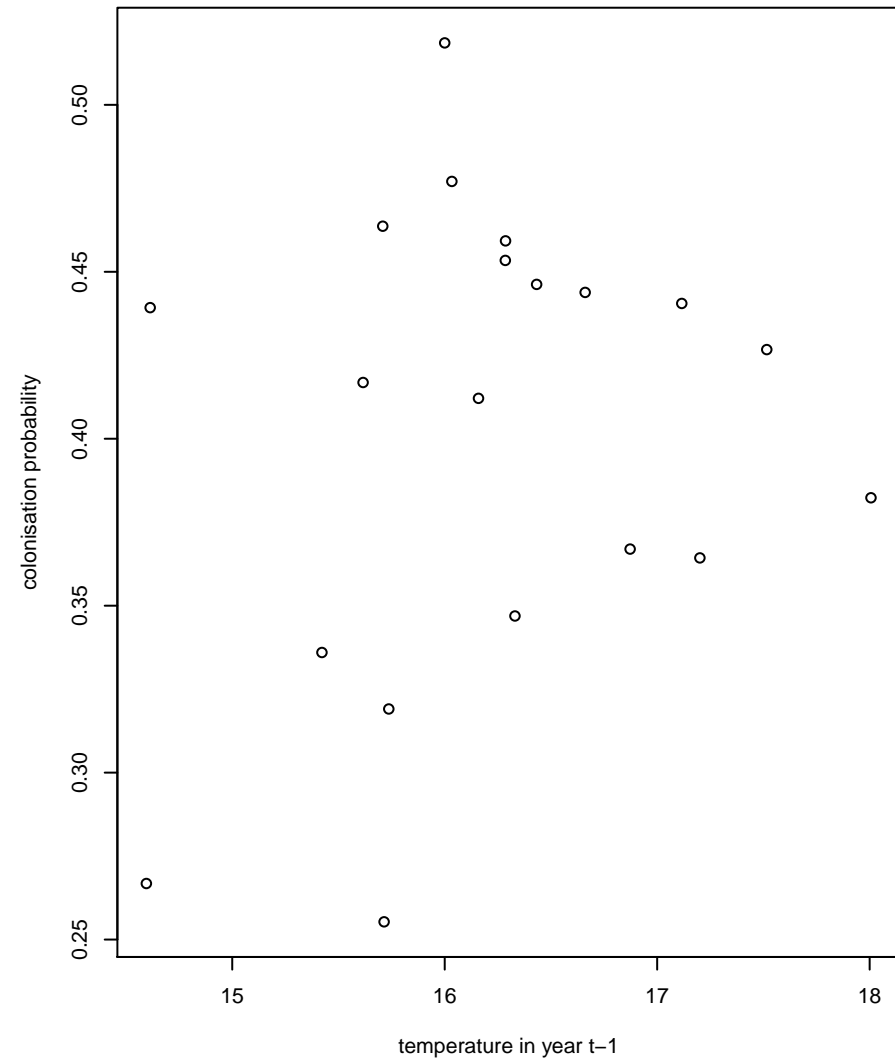

**Erythromma najas**

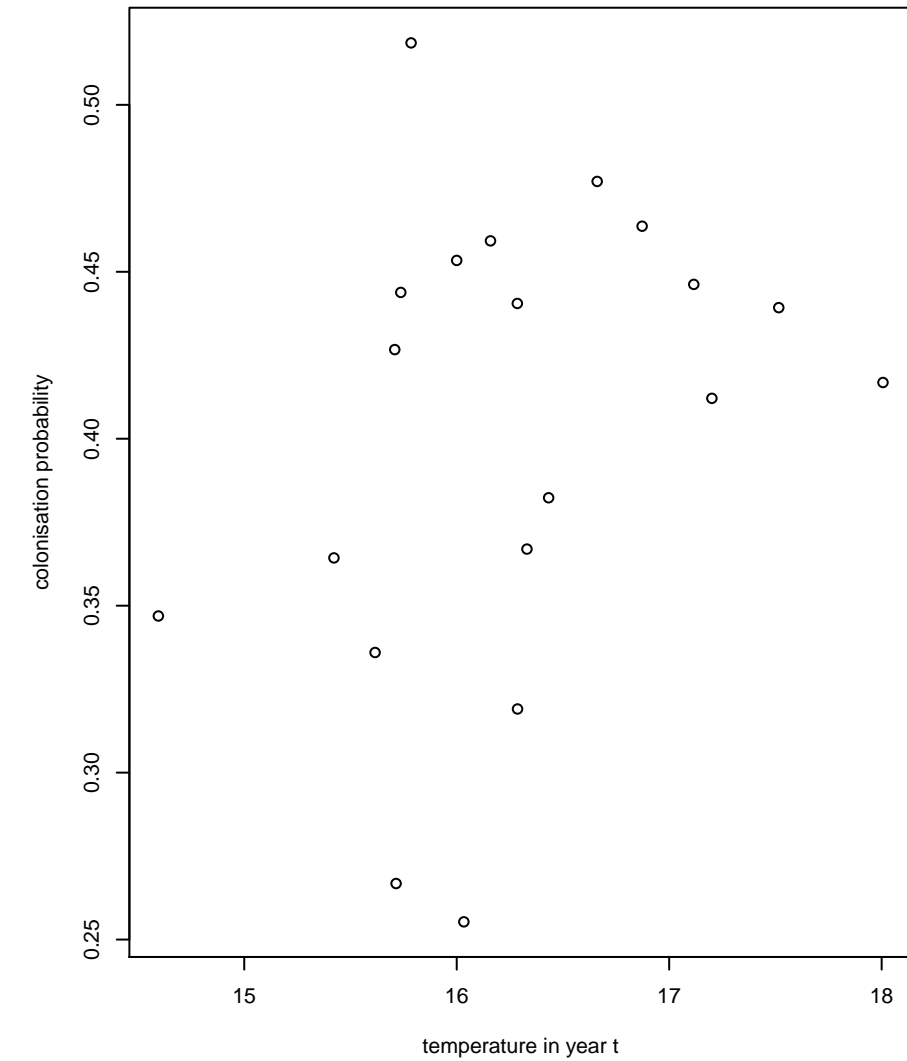

**Brachytron pratense**

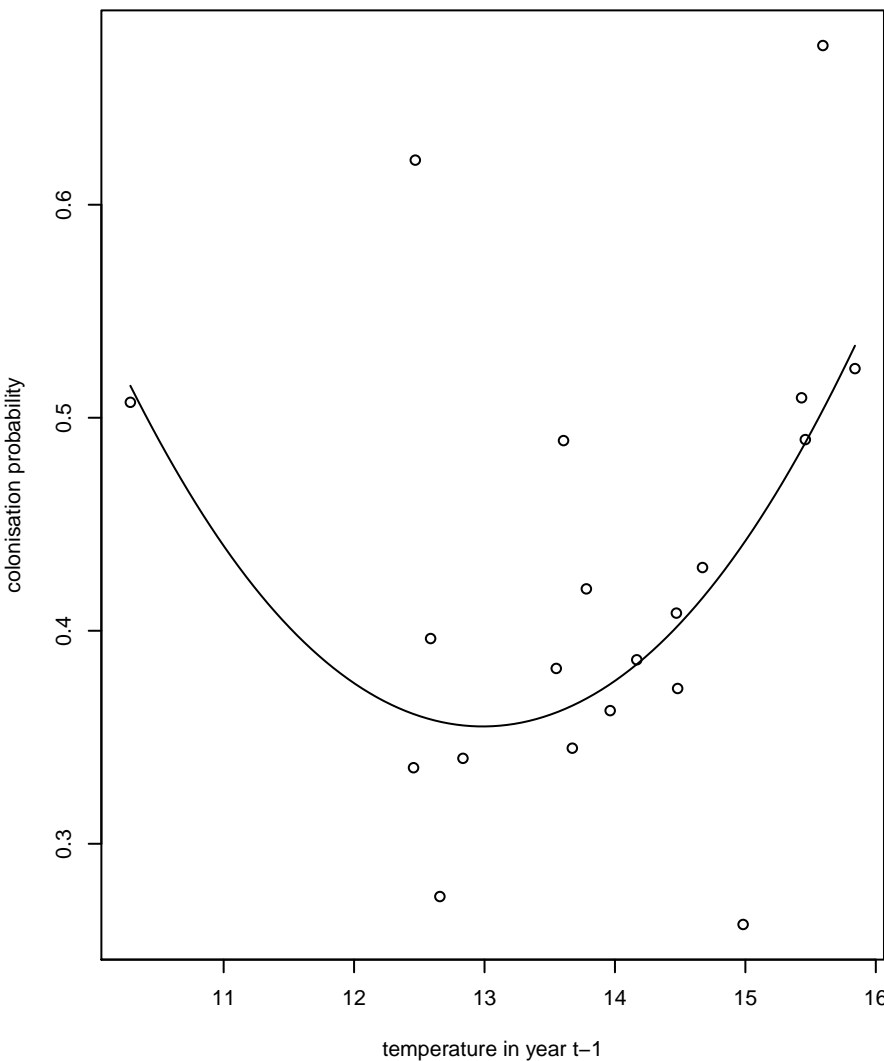

**Brachytron pratense**

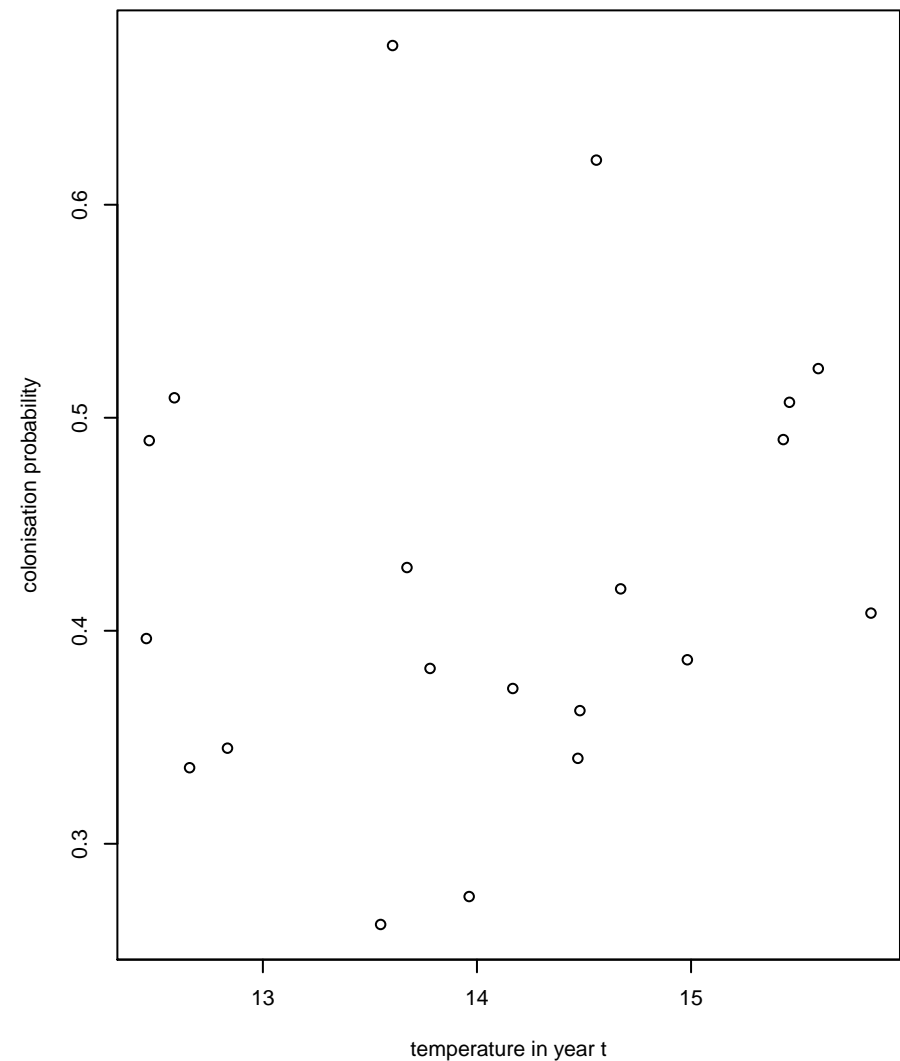

**Pyrrhosoma nymphula**

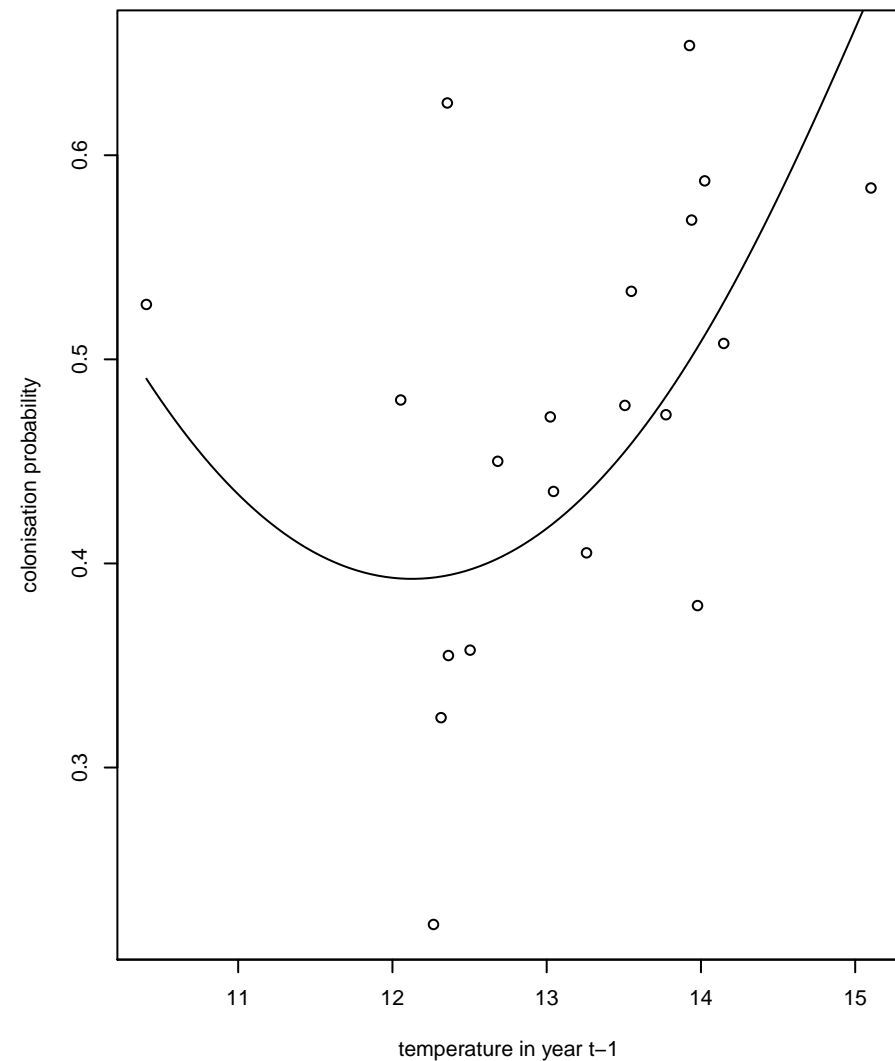

**Pyrrhosoma nymphula**

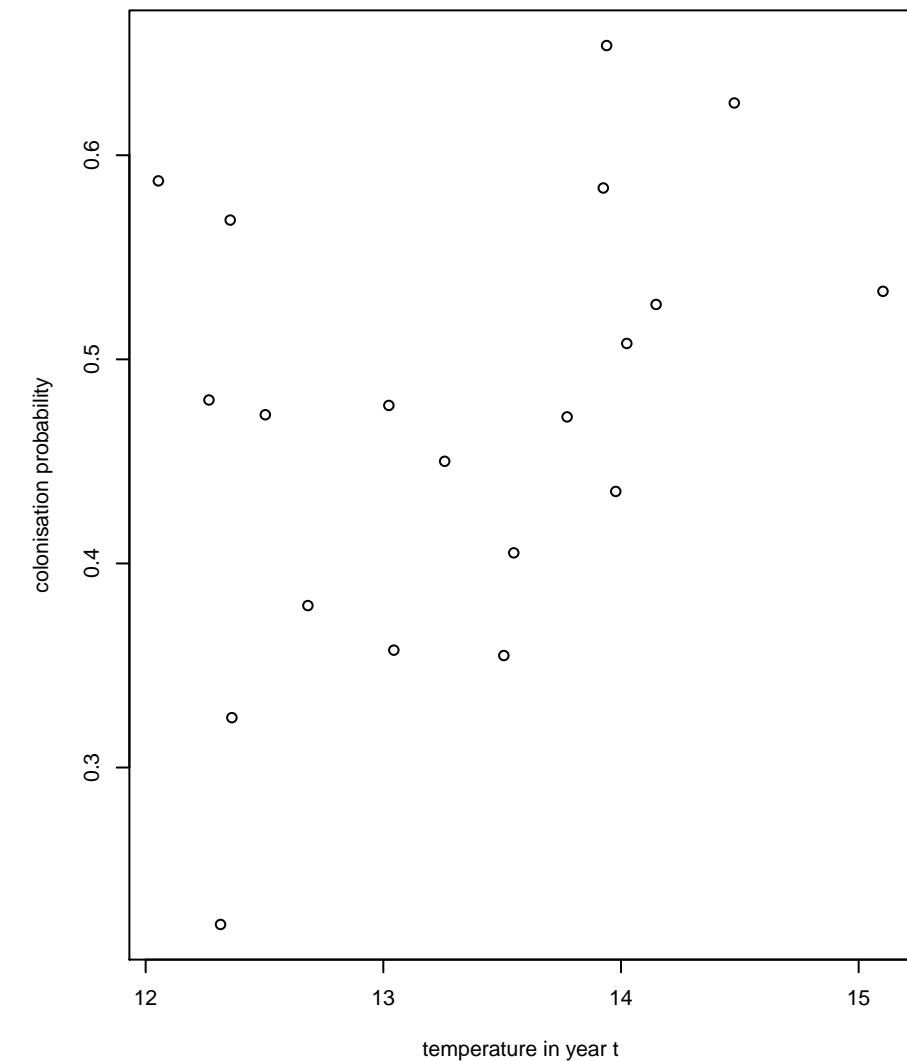

**Coenagrion pulchellum**

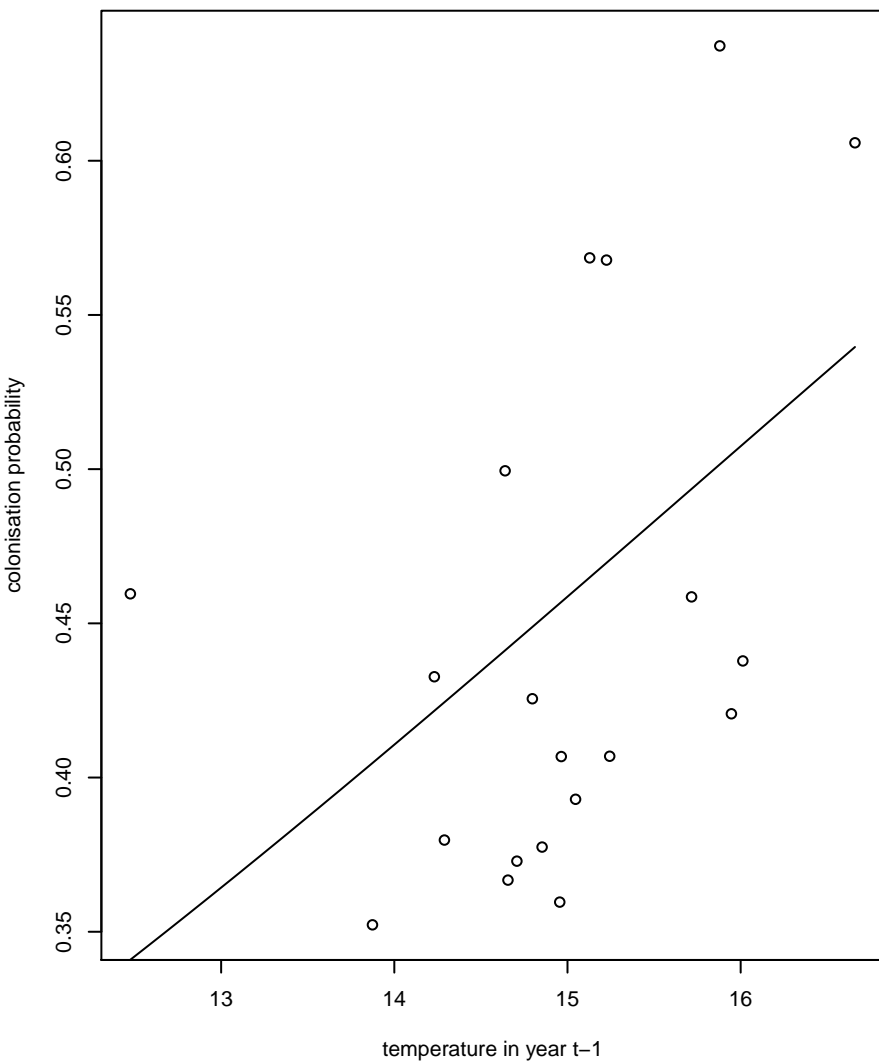

**Coenagrion pulchellum**

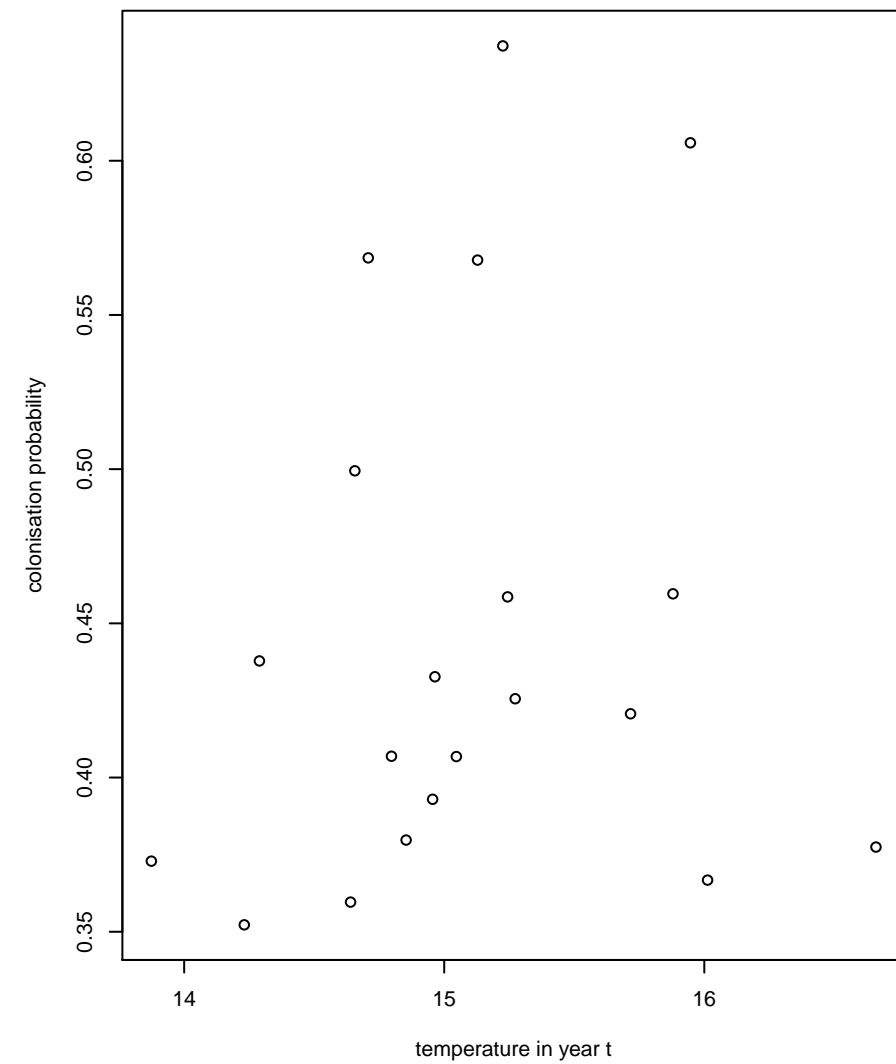

**Sympetrum vulgatum**

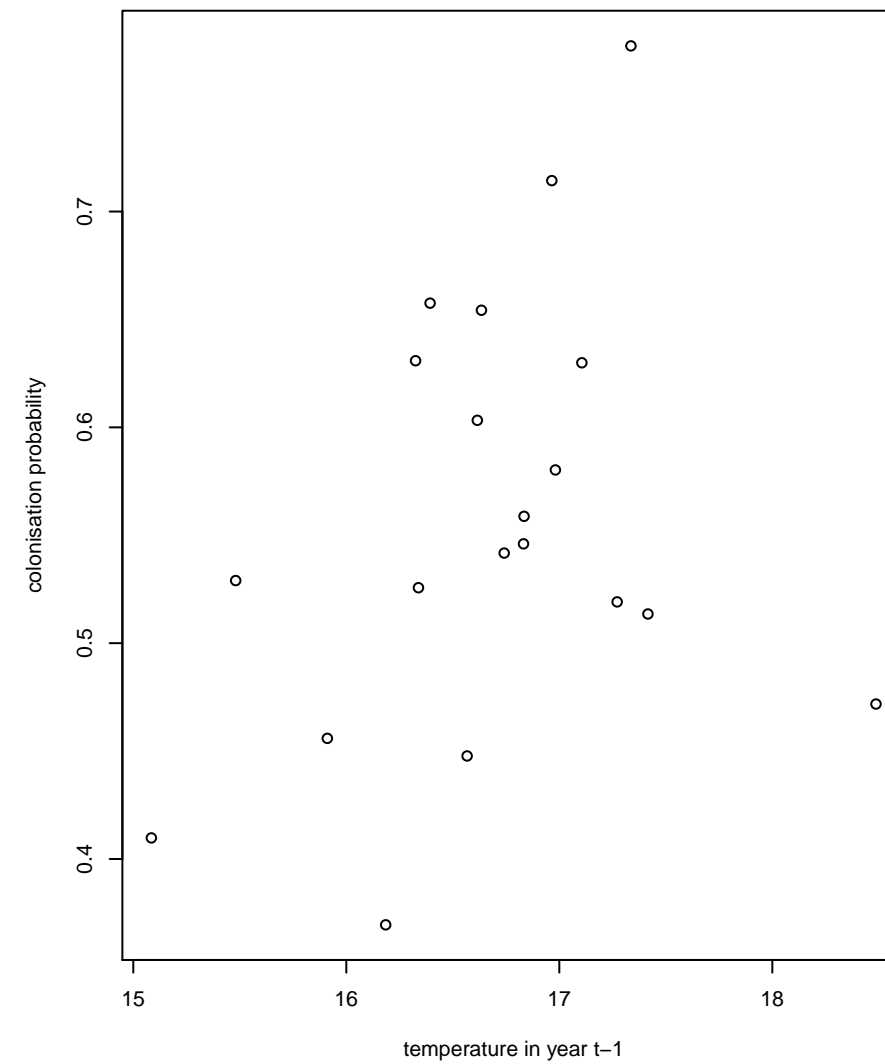

**Sympetrum vulgatum**

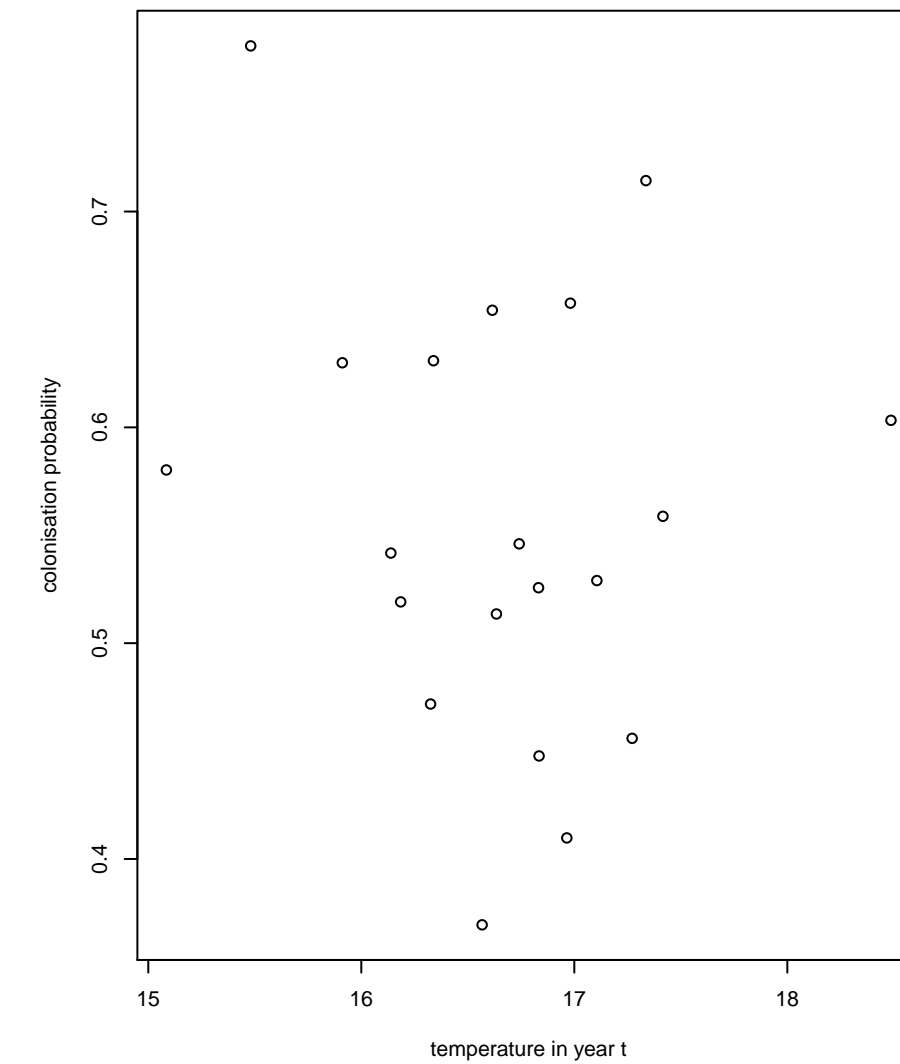

**Ischnura elegans**

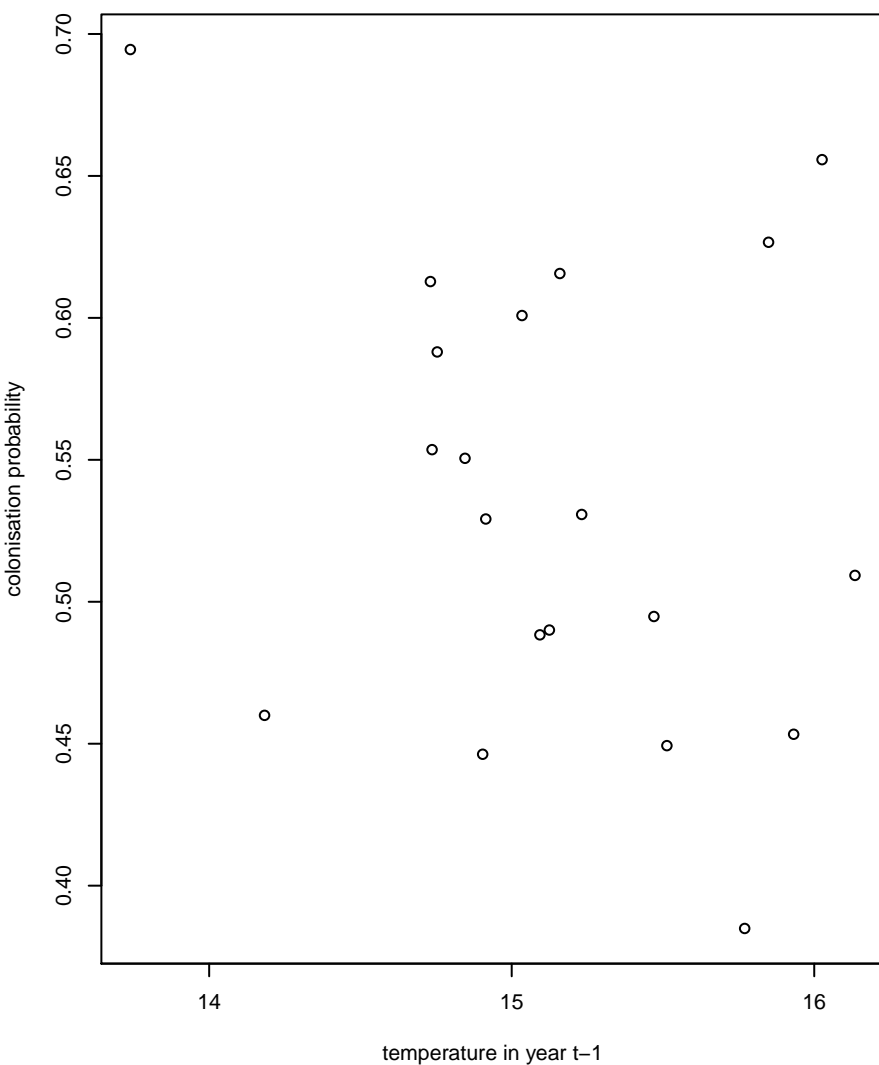

**Ischnura elegans**

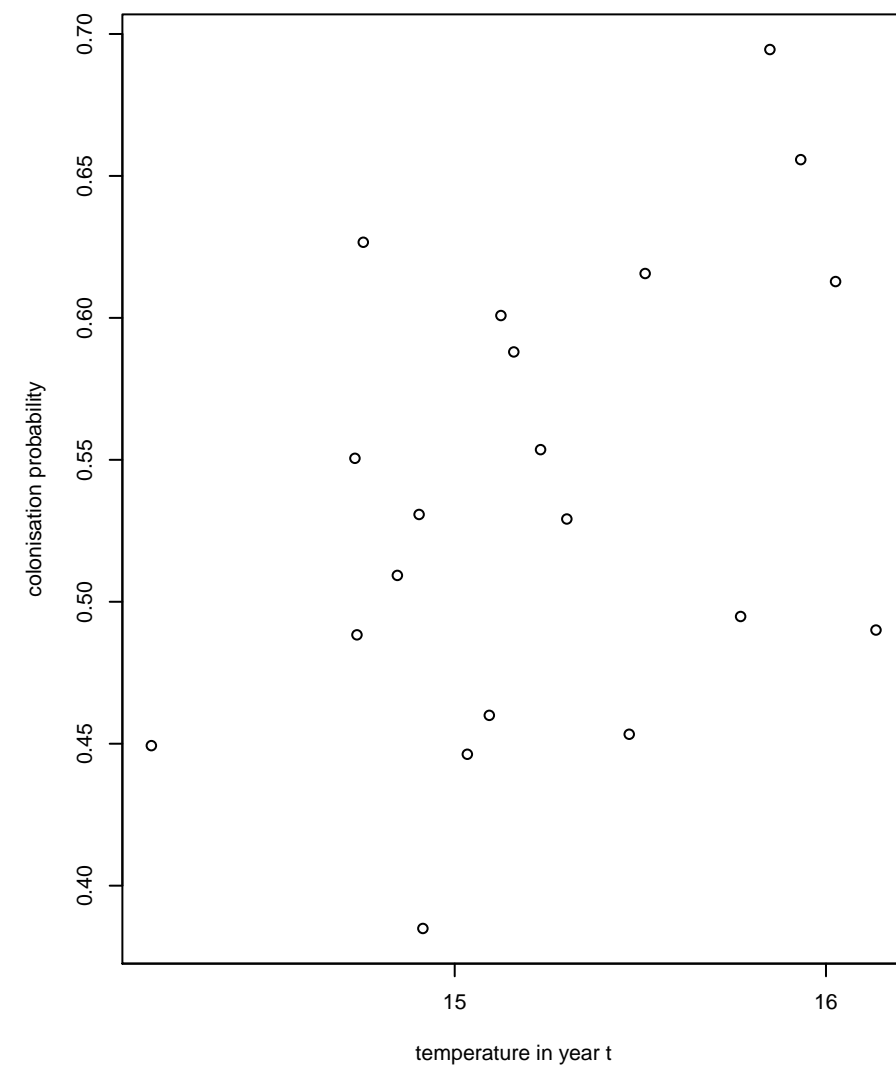

**Orthetrum cancellatum**

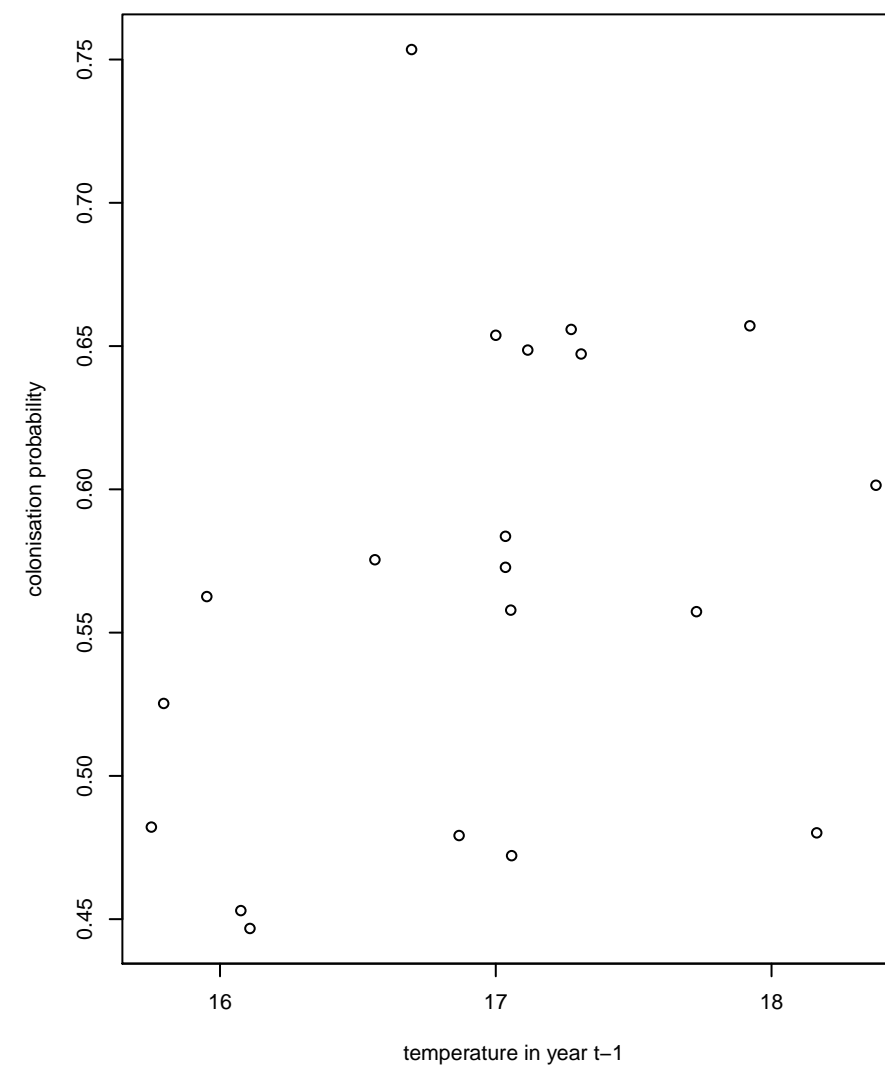

**Orthetrum cancellatum**

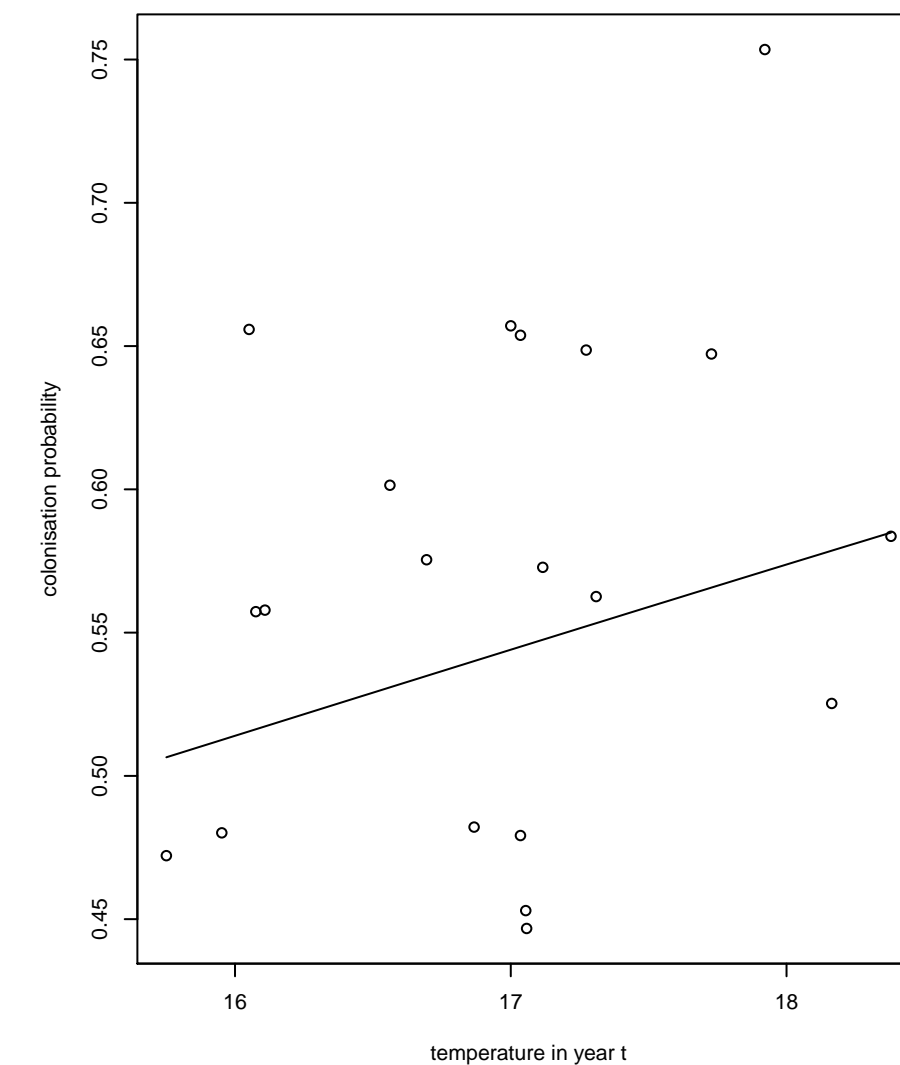

**Libellula quadrimaculata**

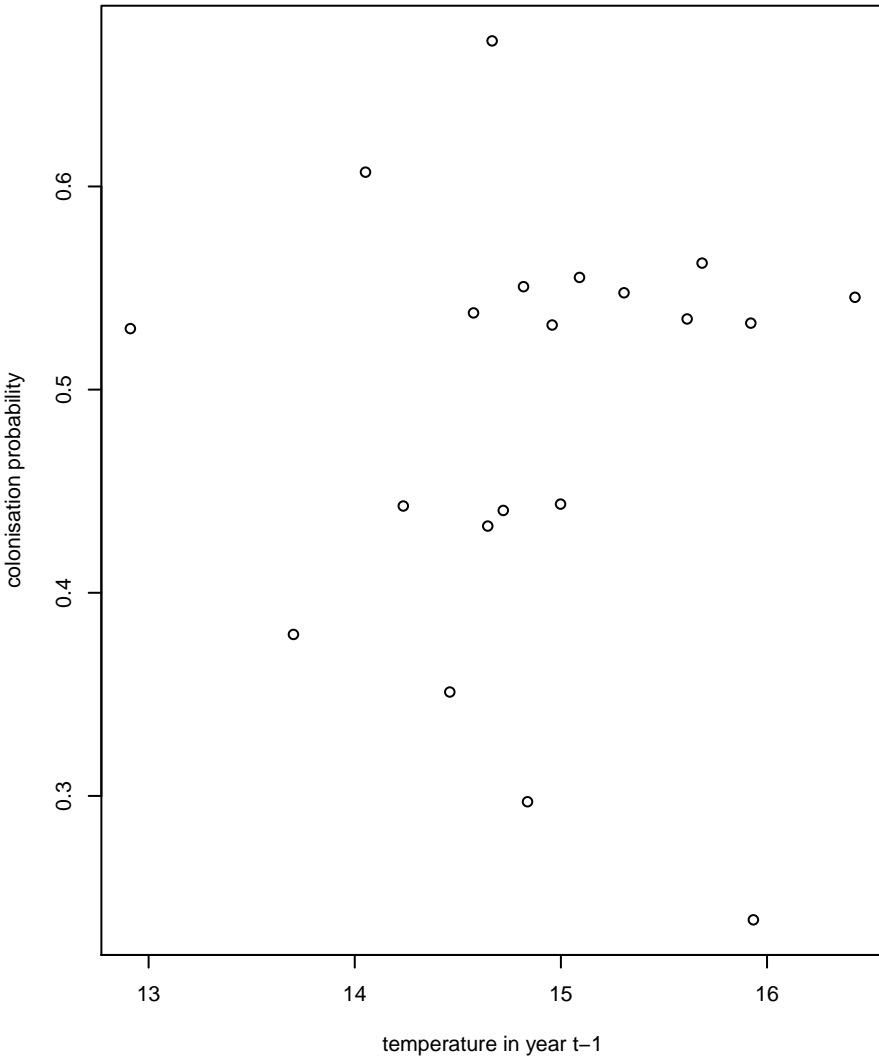

**Libellula quadrimaculata**

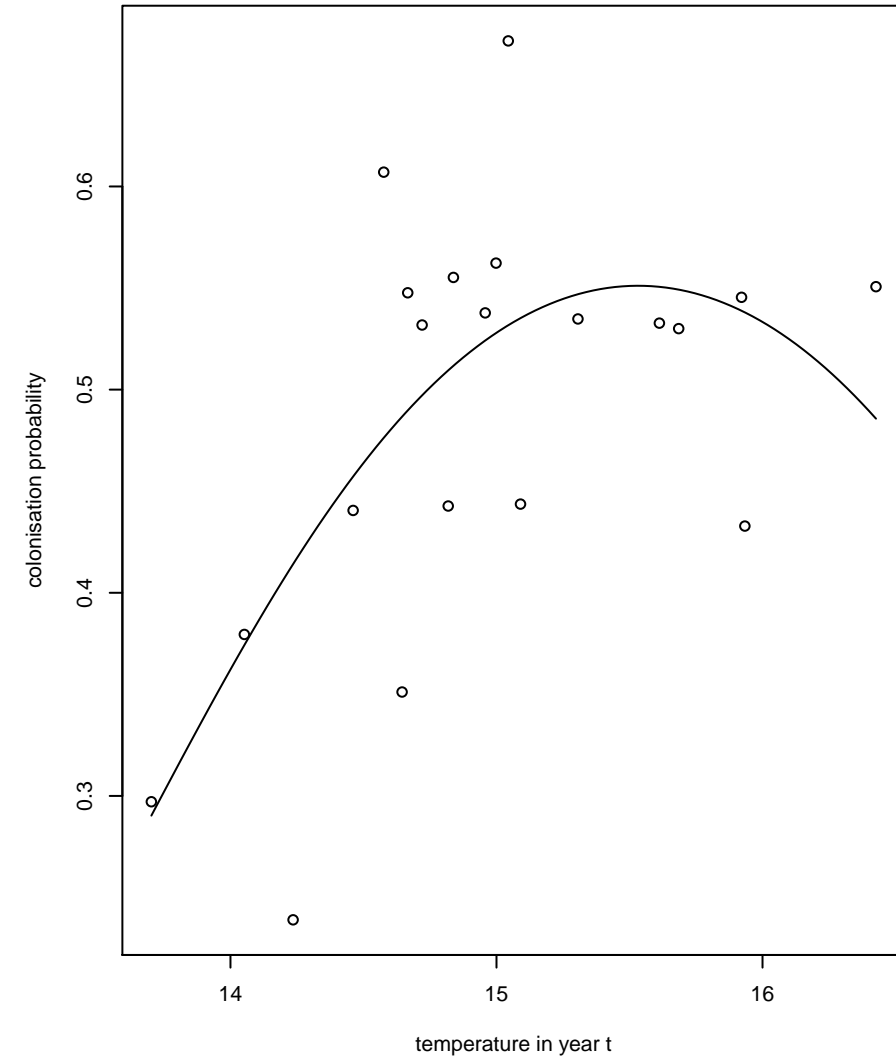

**Lestes sponsa**

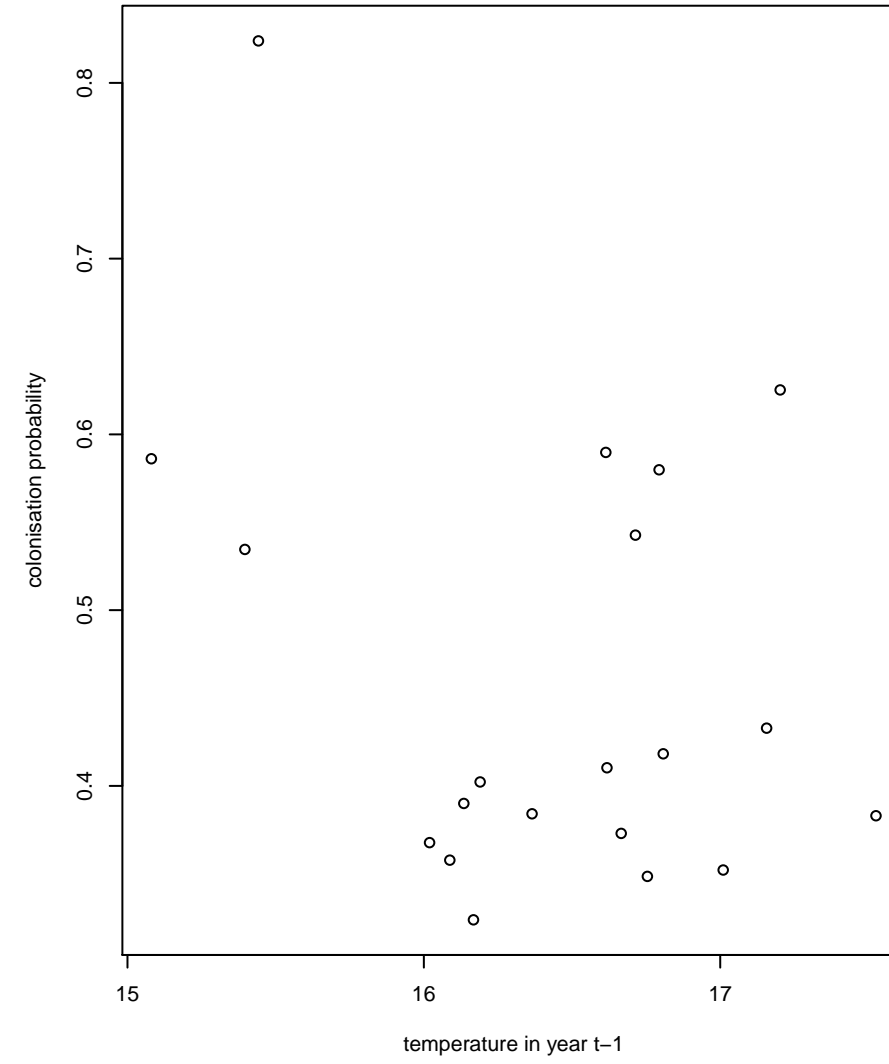

**Lestes sponsa**

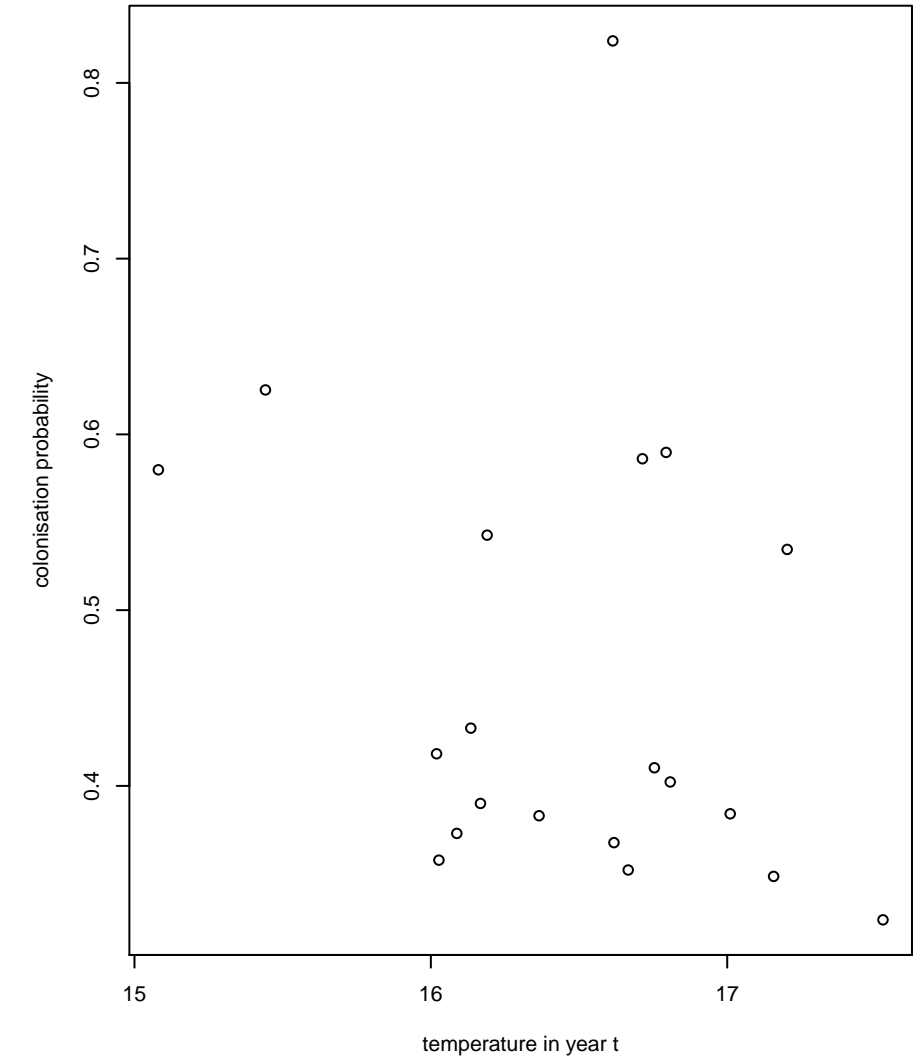

**Ceriagrion tenellum**

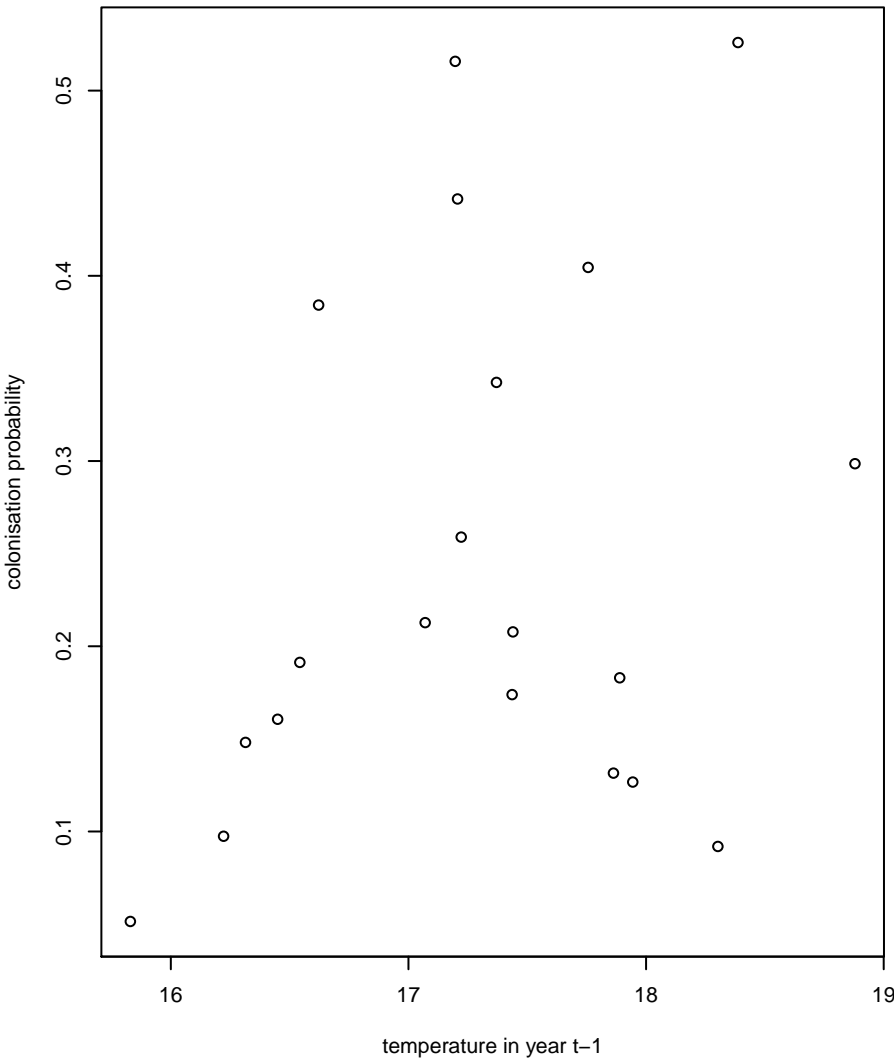

**Ceriagrion tenellum**

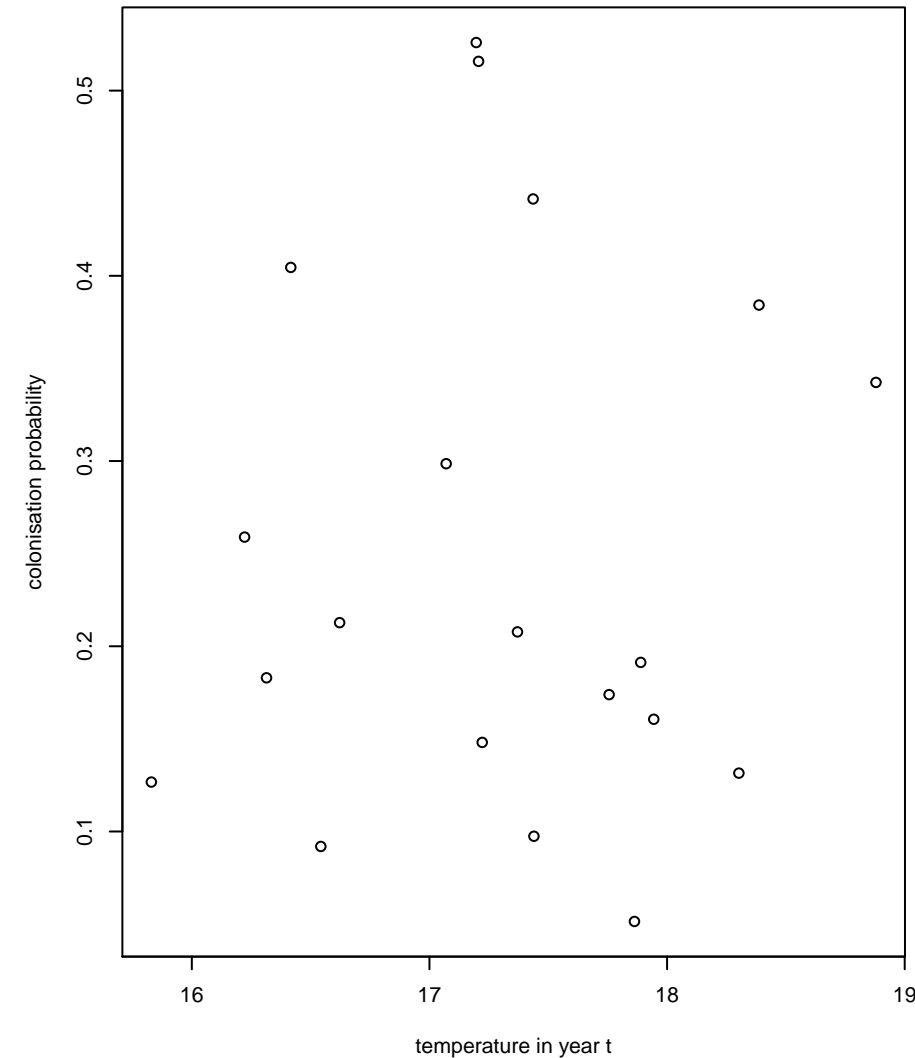

**Aeshna mixta**

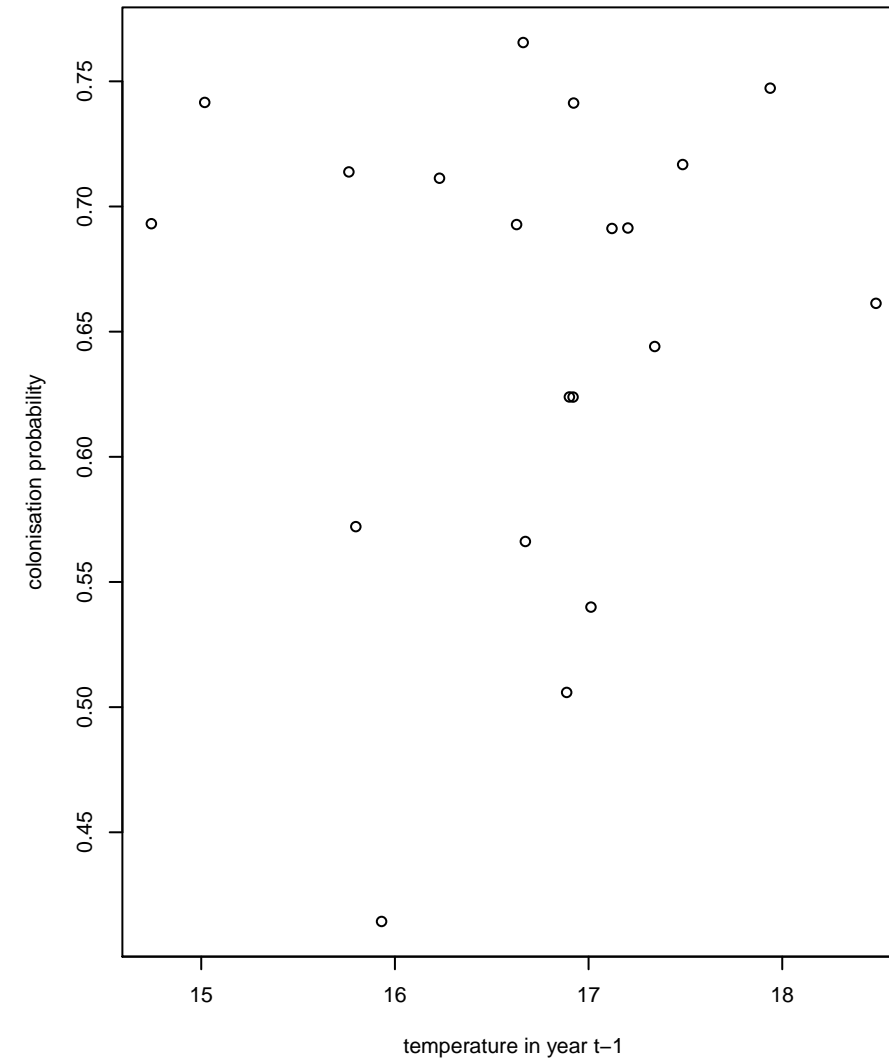

**Aeshna mixta**

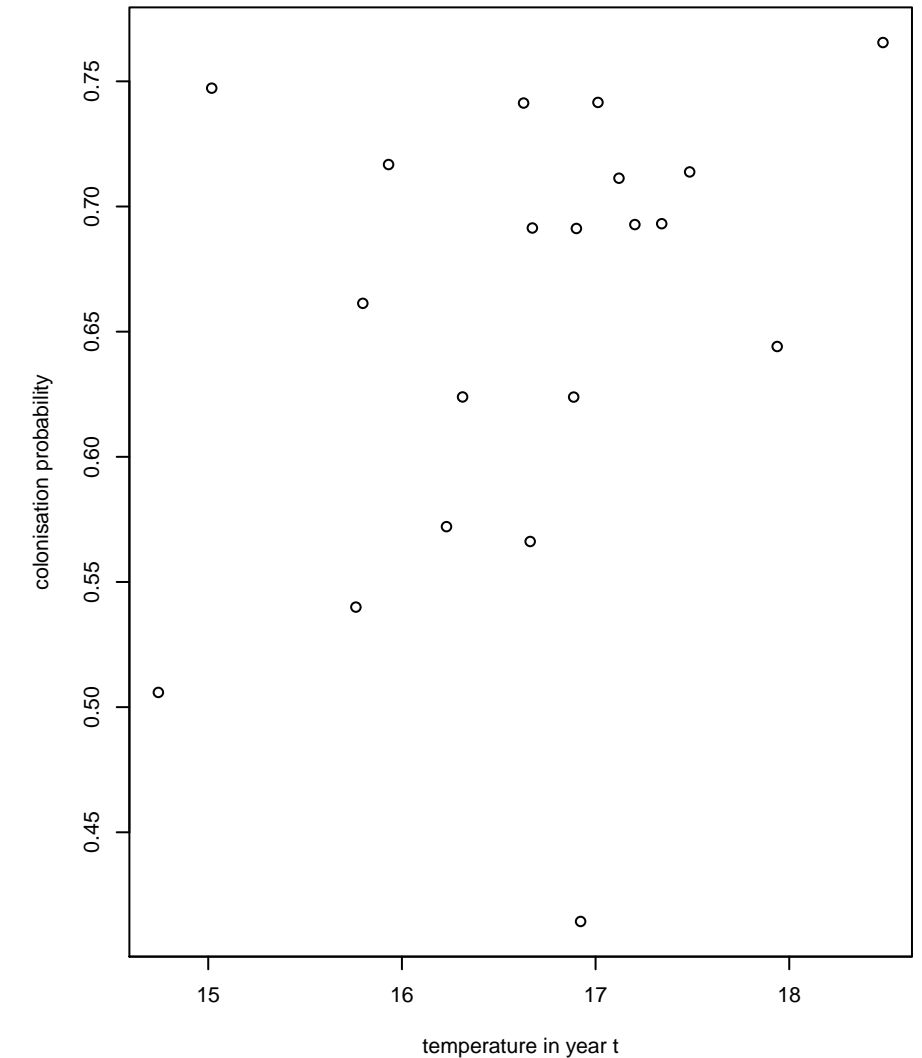

**Sympetrum sanguineum**

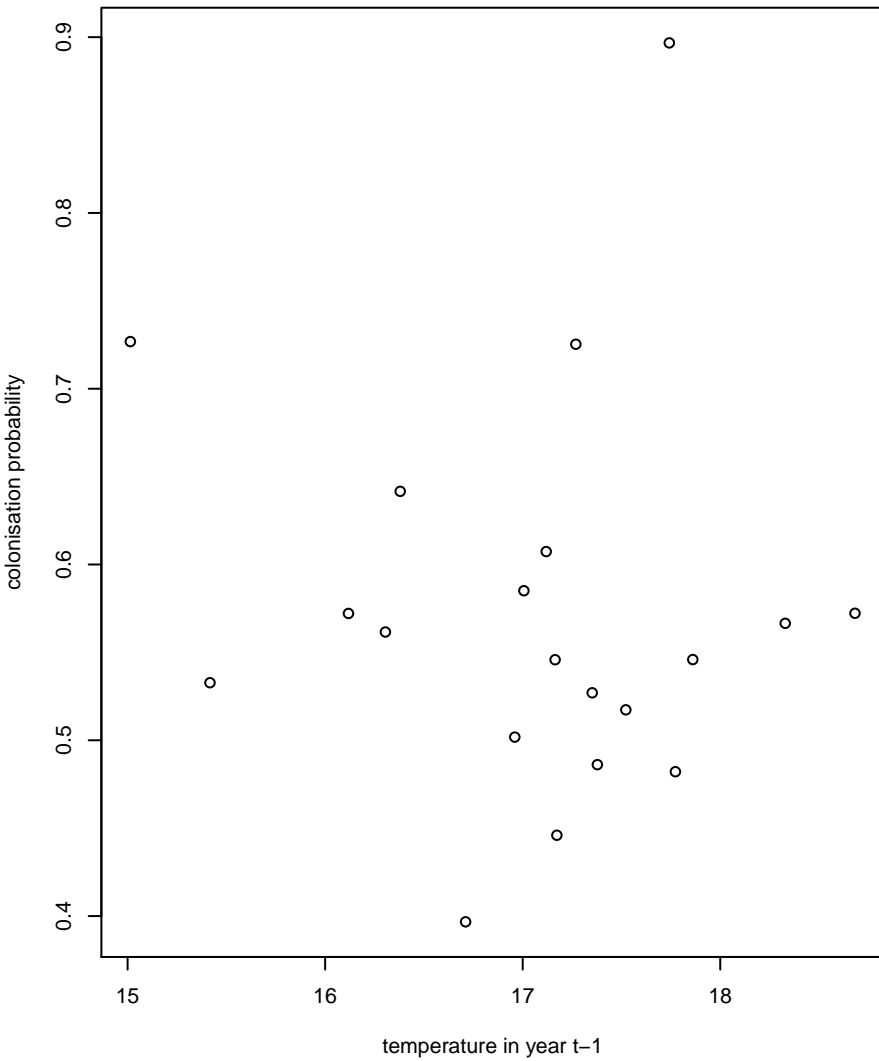

**Sympetrum sanguineum**

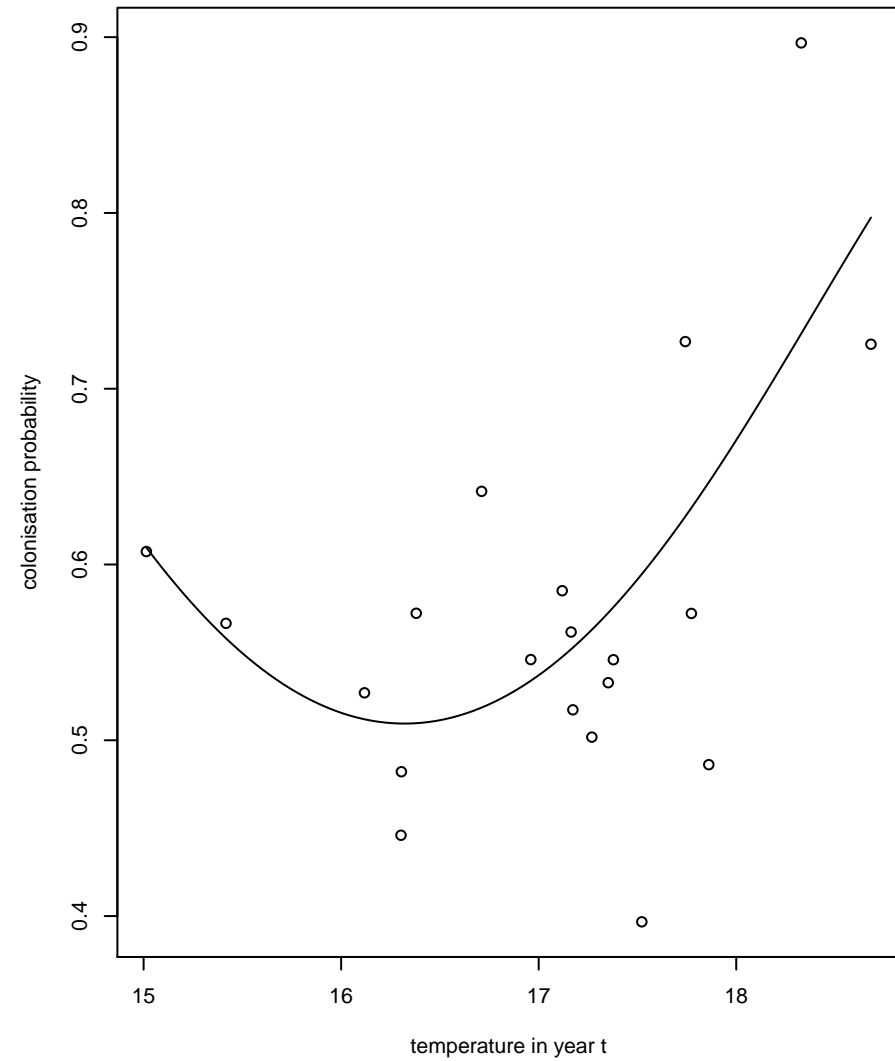

**Lestes viridis**

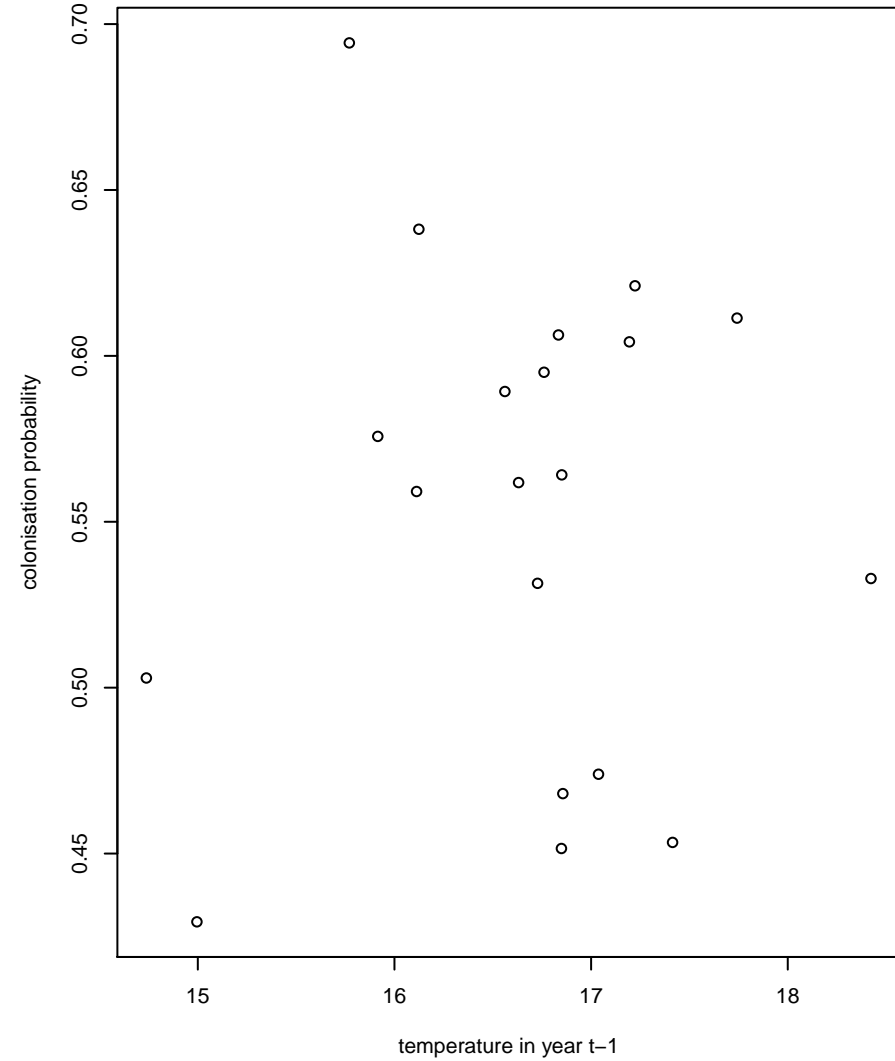

**Lestes viridis**

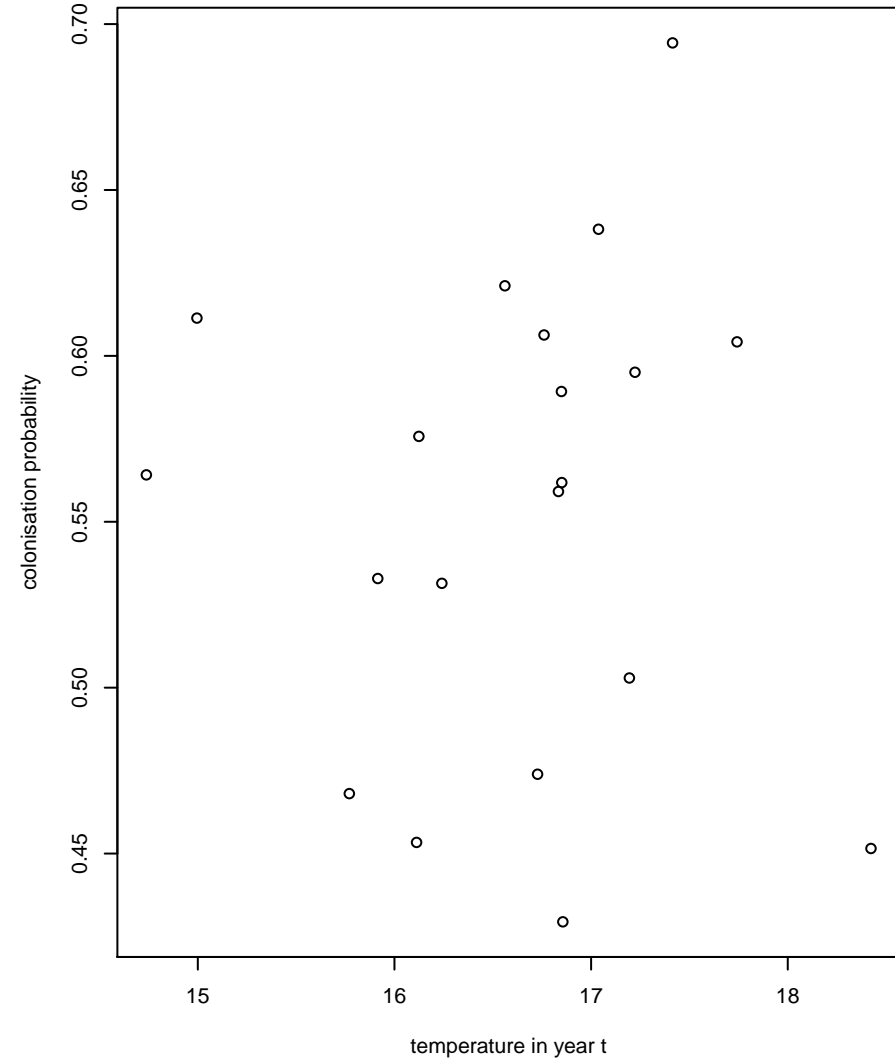

**Calopteryx splendens**

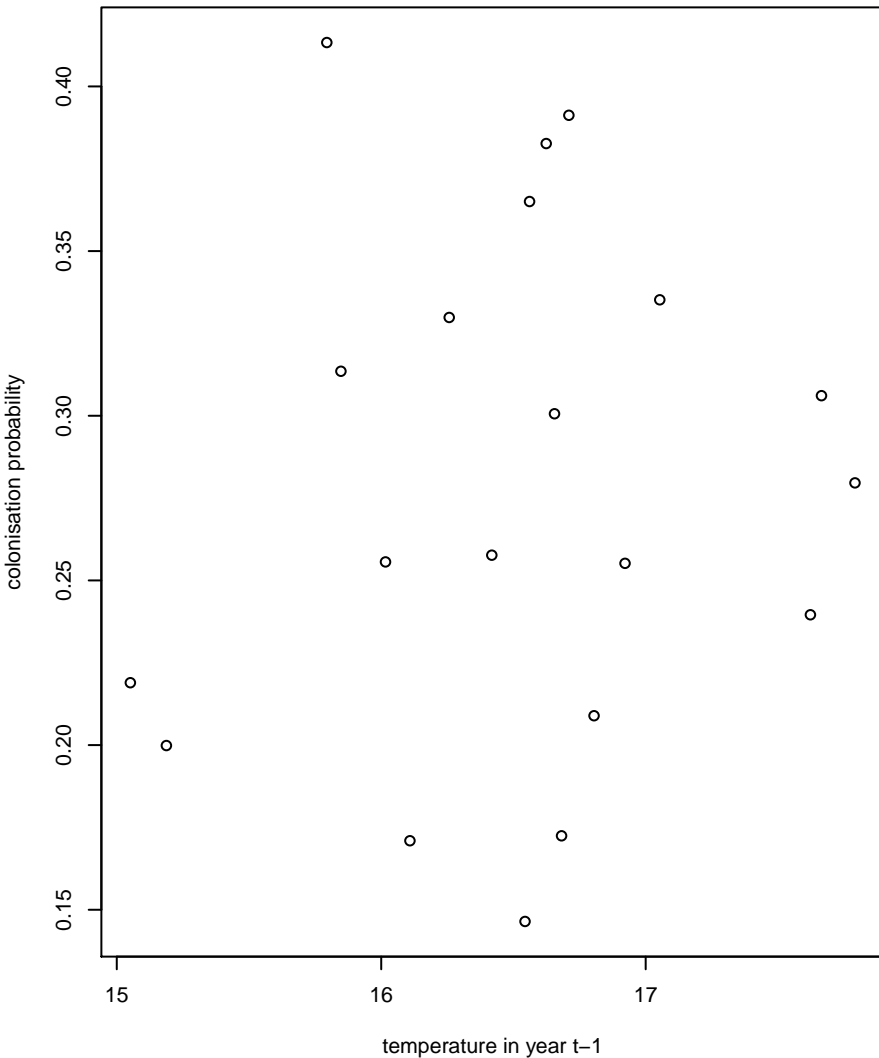

**Calopteryx splendens**

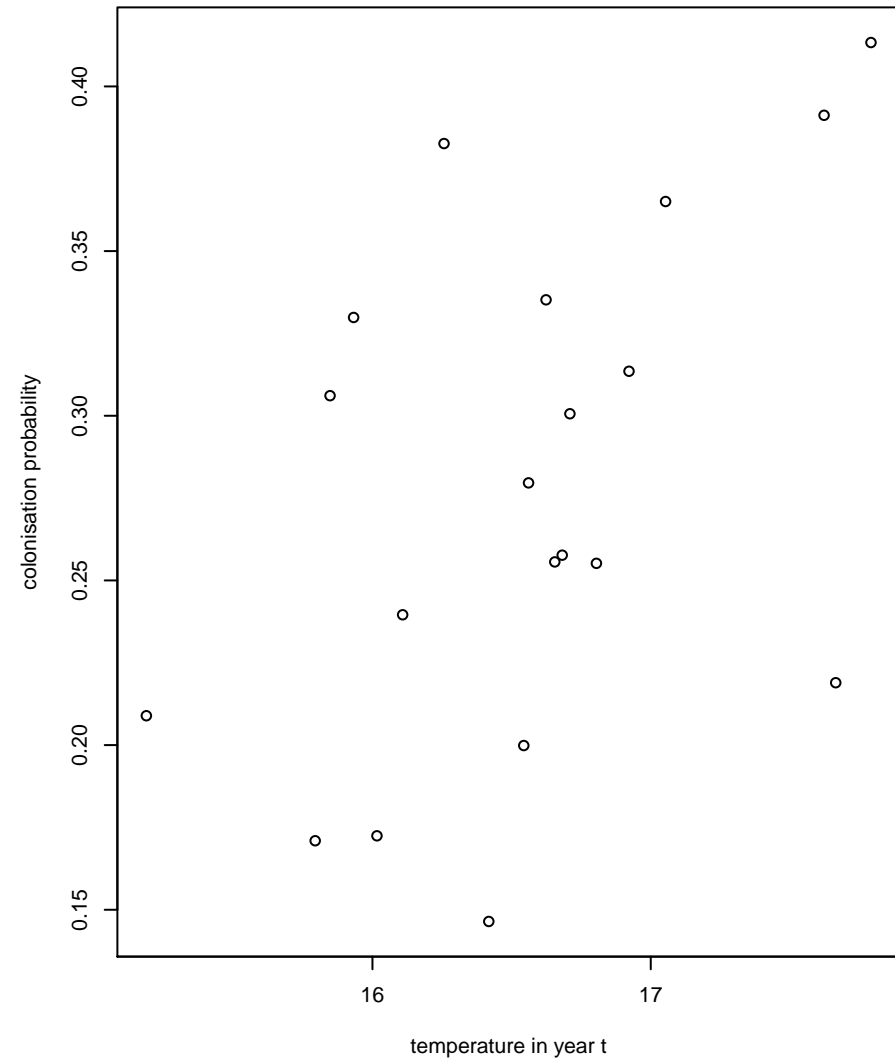

**Sympetrum danae**

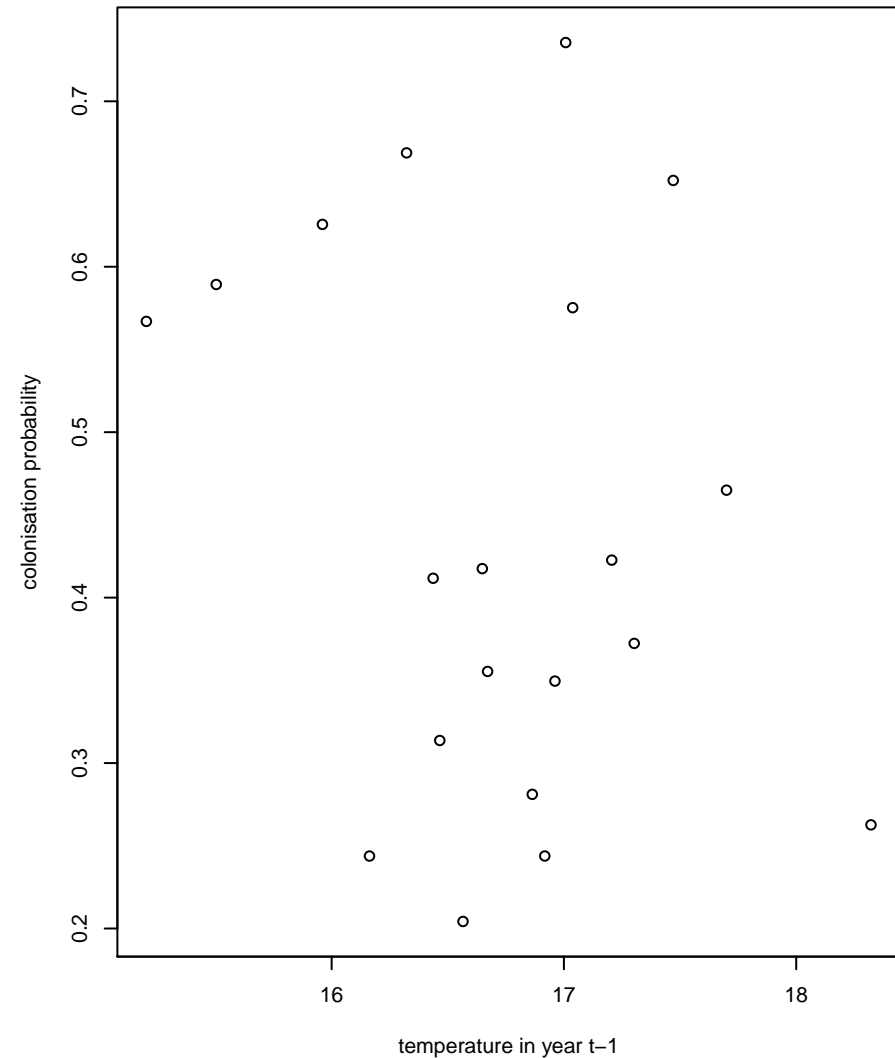

**Sympetrum danae**

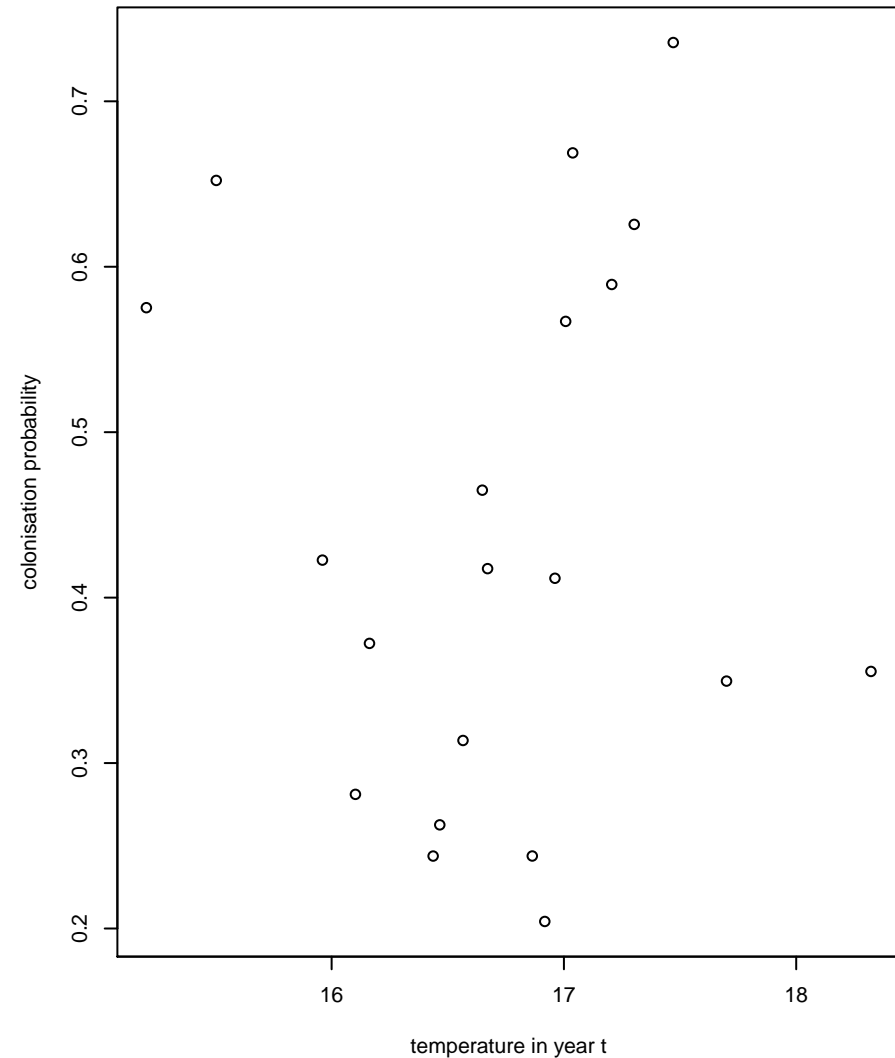

**Leucorrhinia rubicunda**

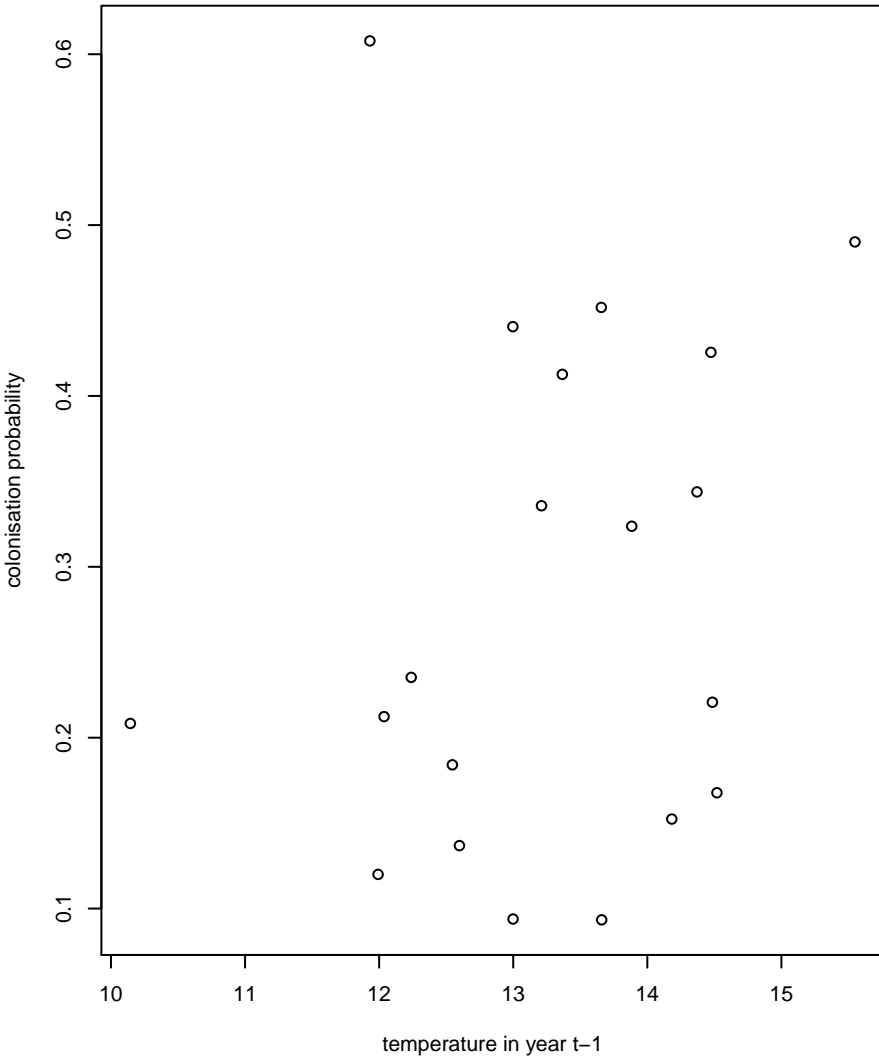

**Leucorrhinia rubicunda**

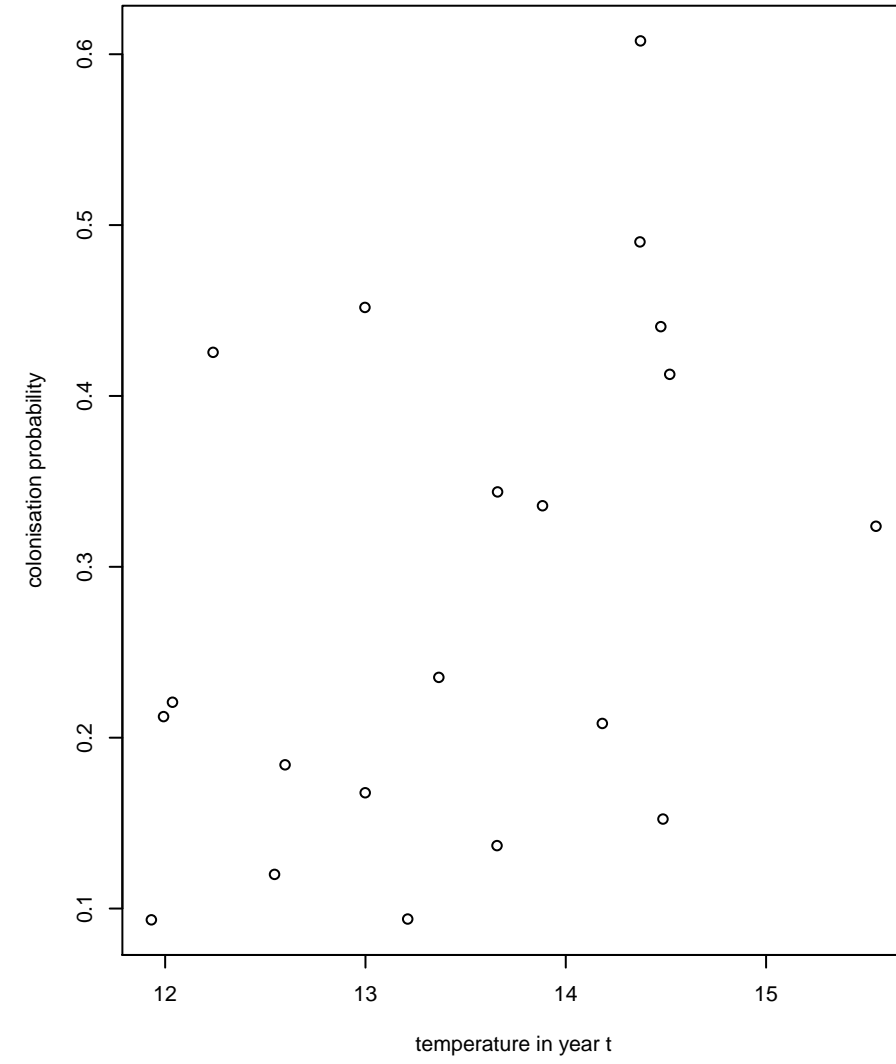

**Enallagma cyathigerum**

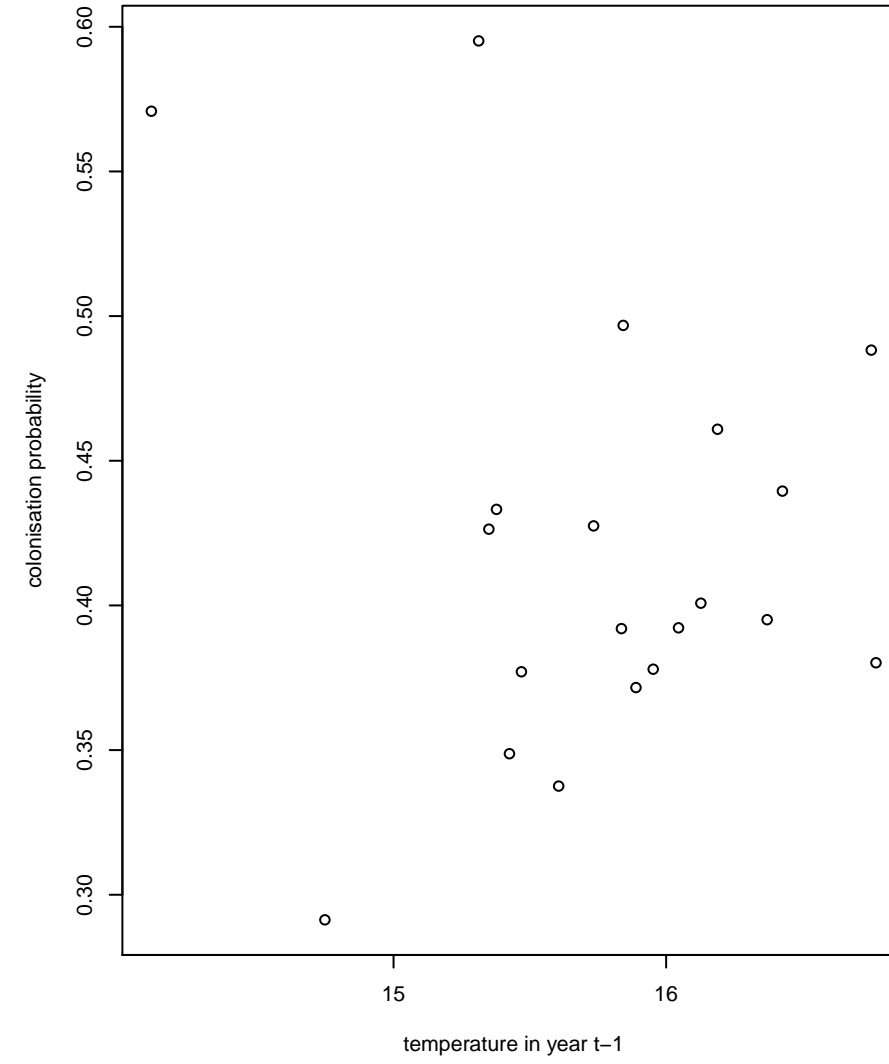

**Enallagma cyathigerum**

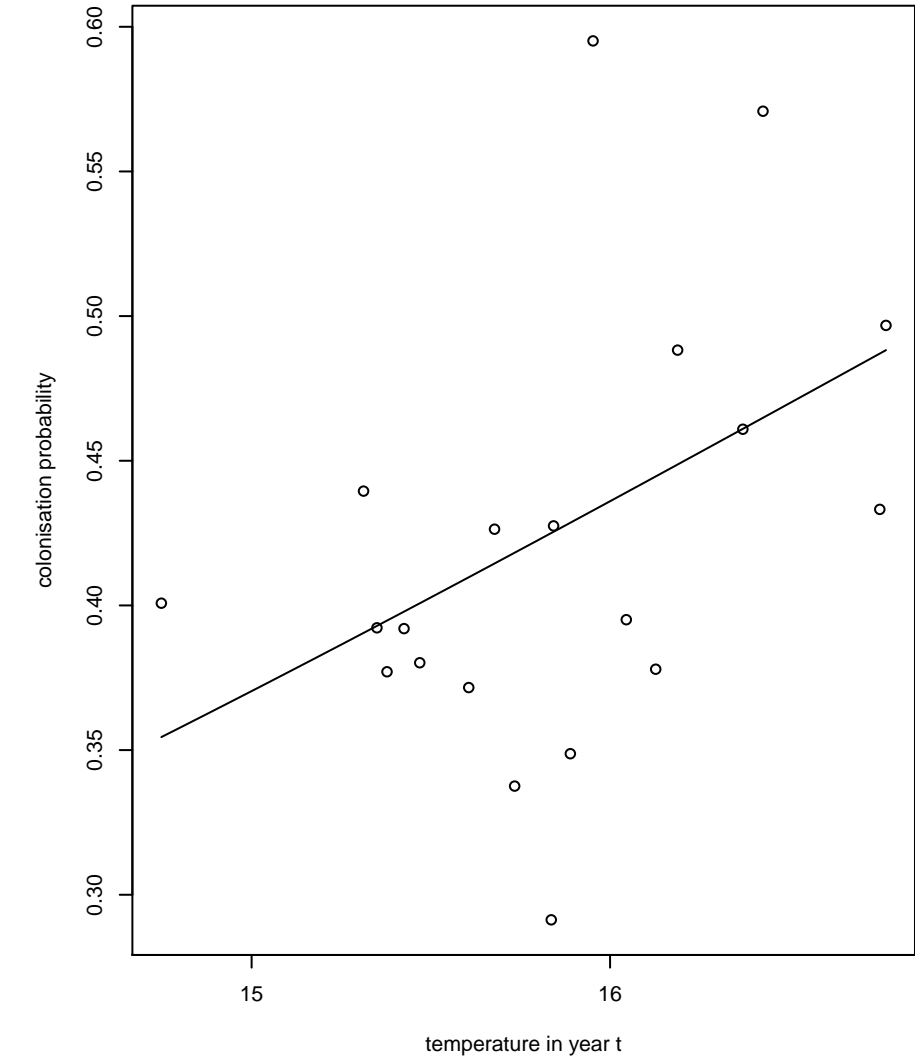

**Calopteryx virgo**

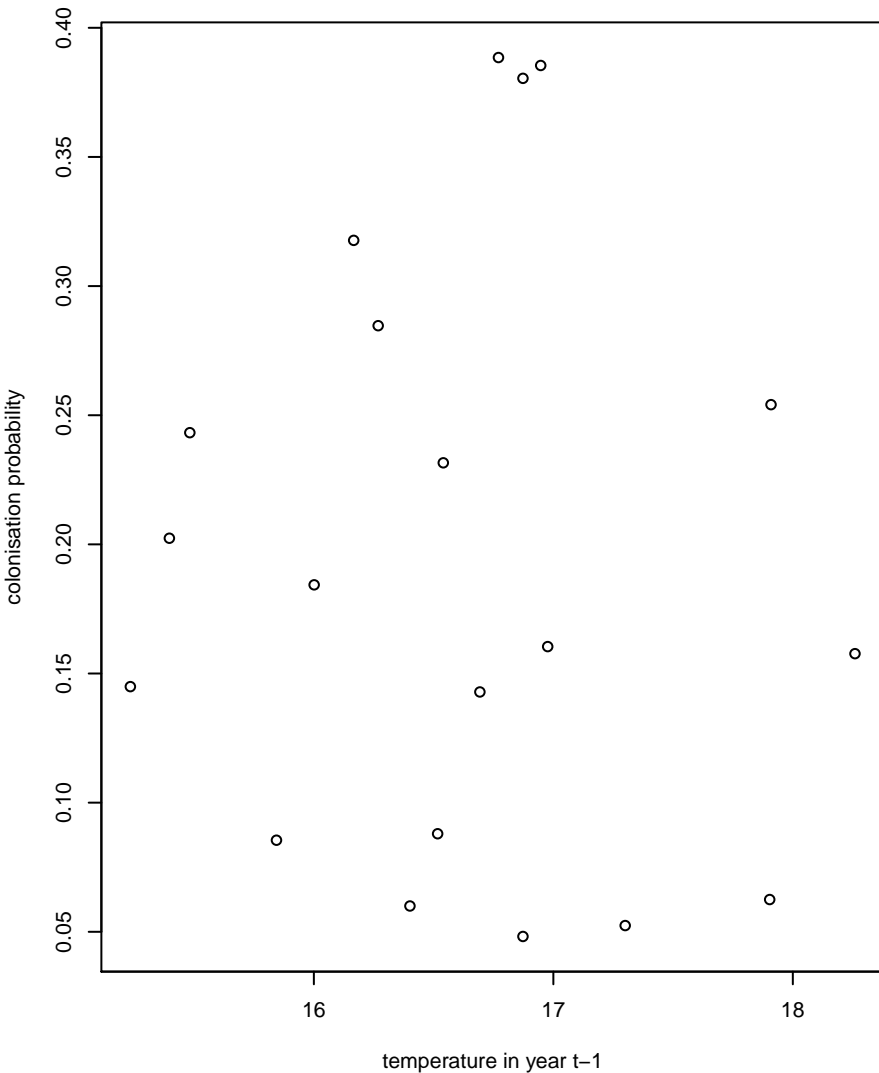

**Calopteryx virgo**

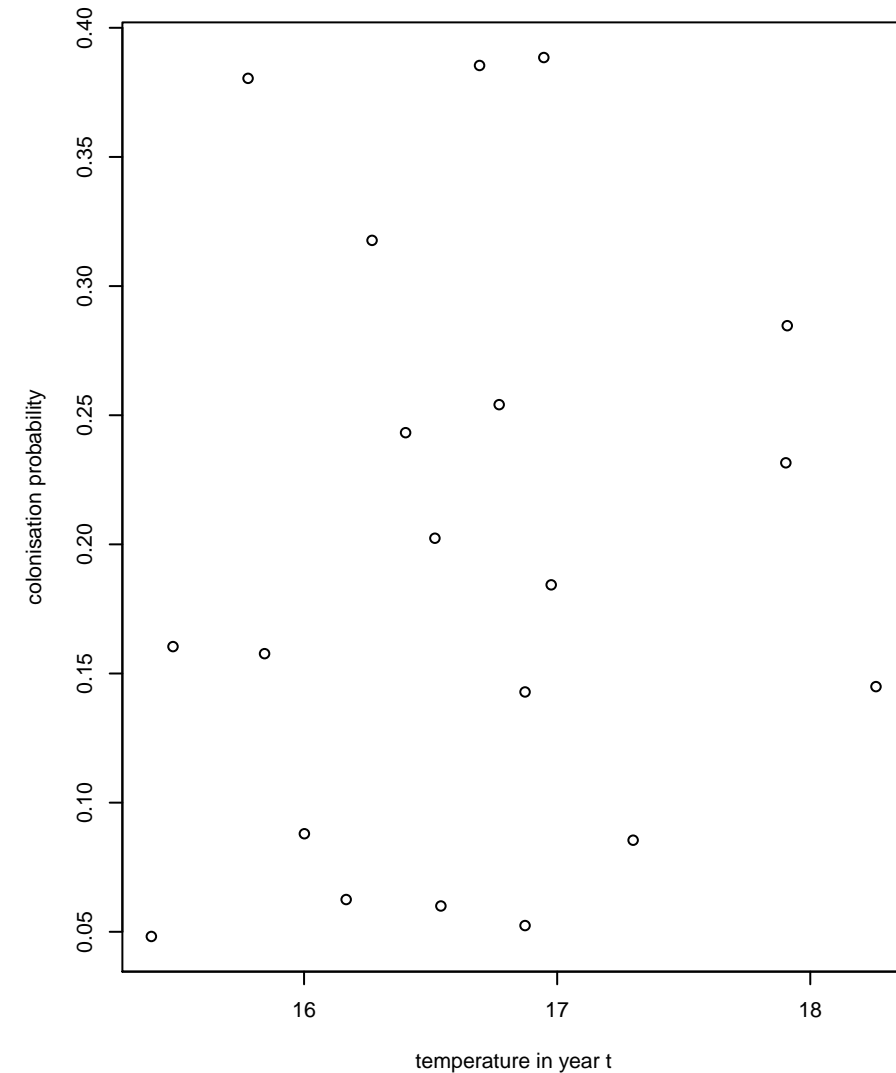

**Ischnura pumilio**

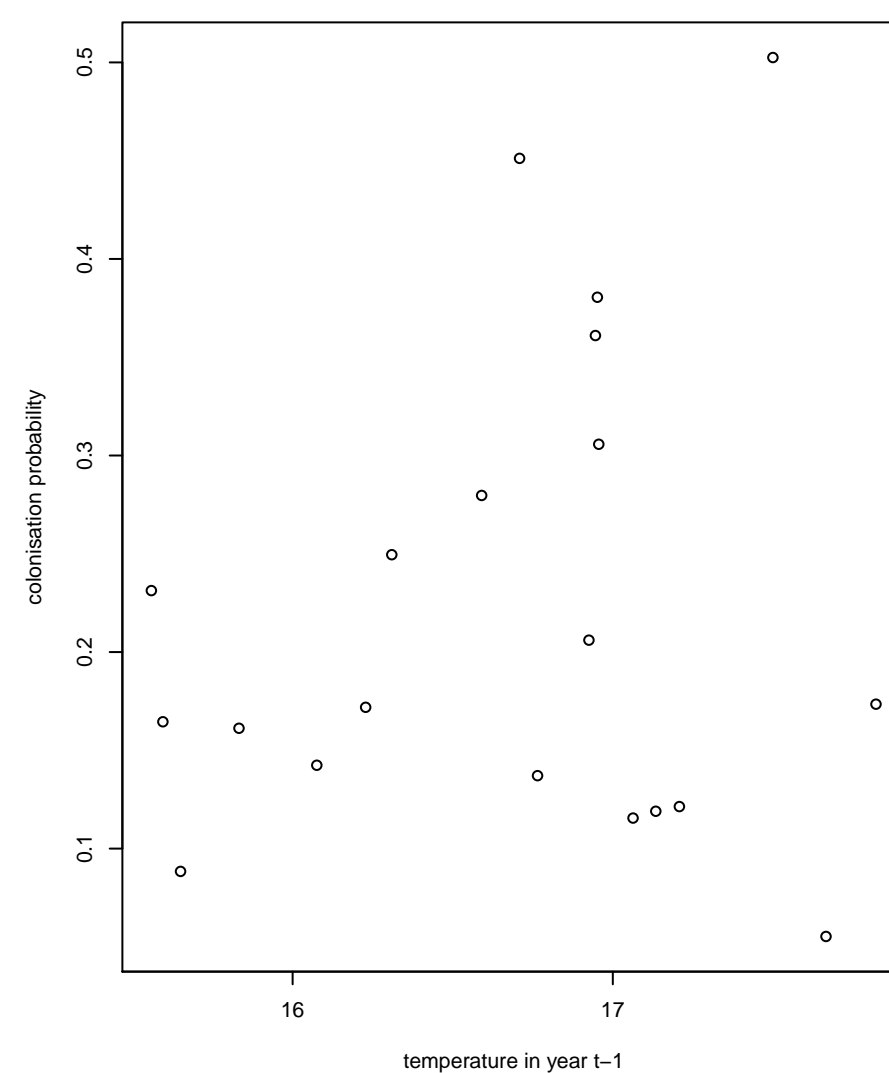

**Ischnura pumilio**

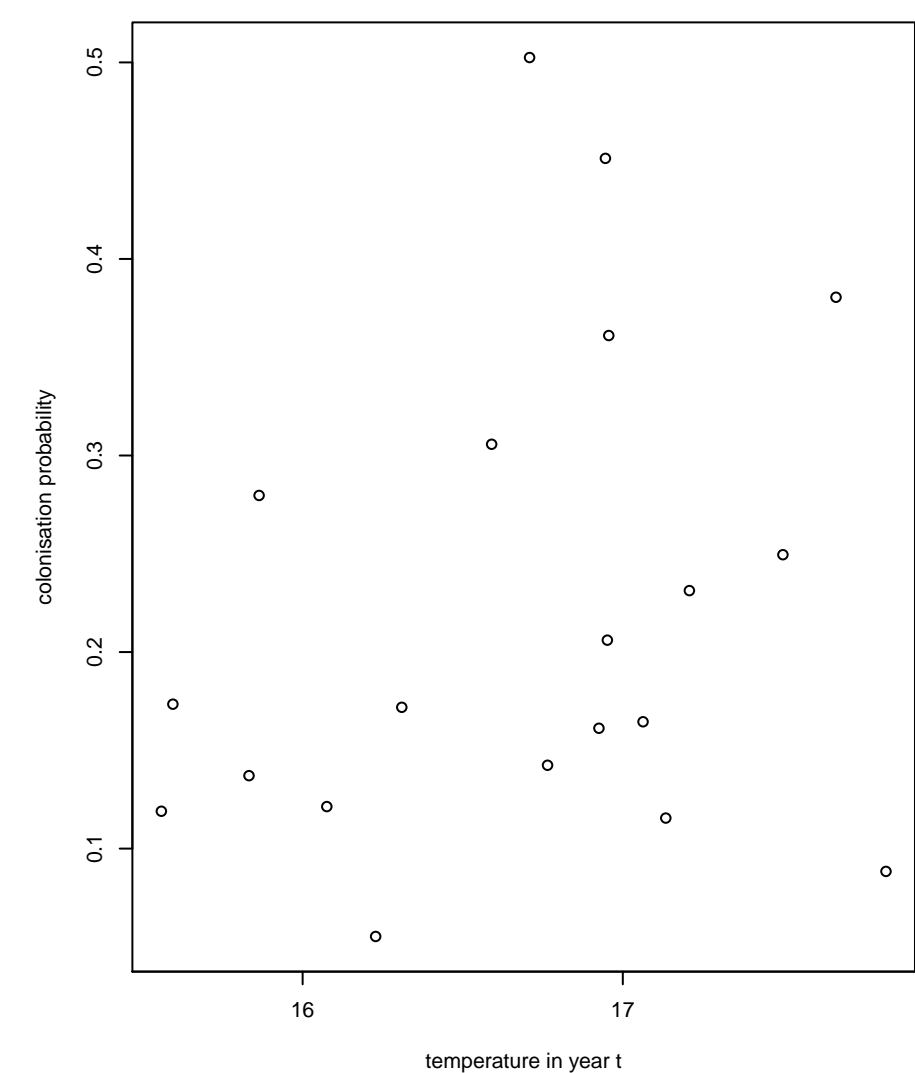

**Aeshna isoceles**

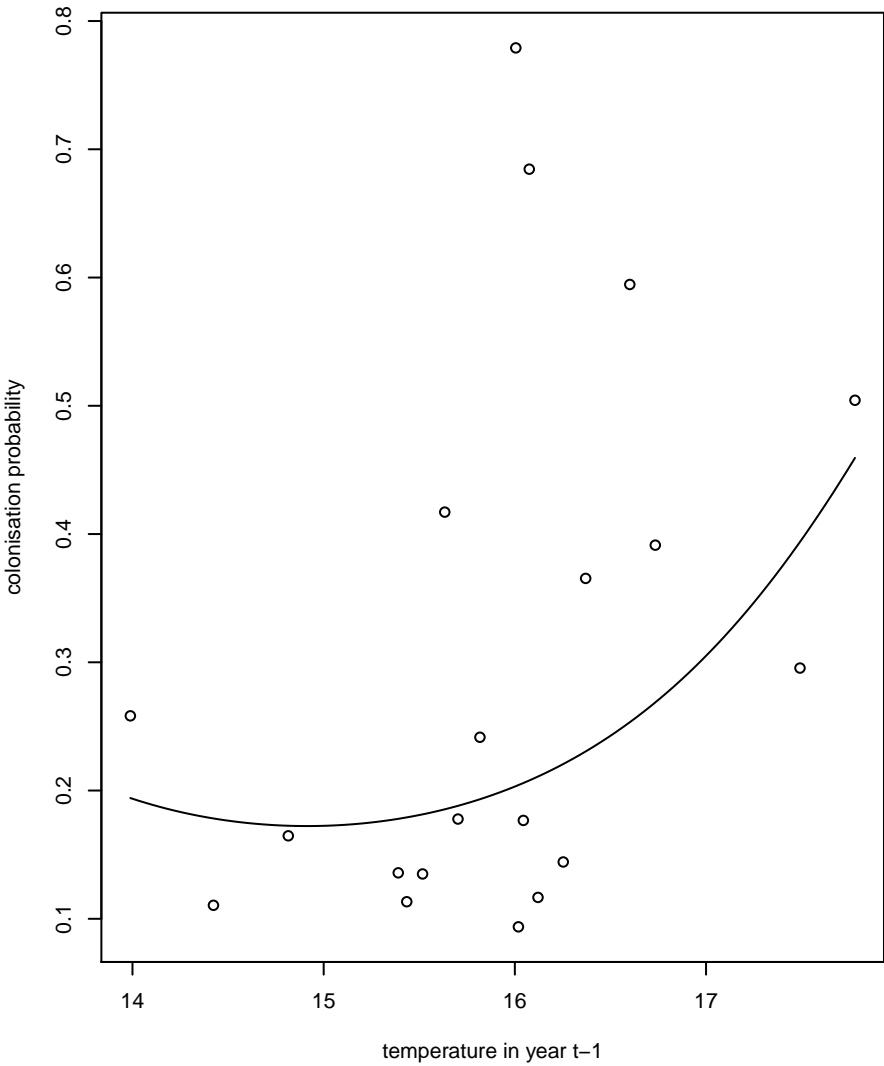

**Aeshna isoceles**

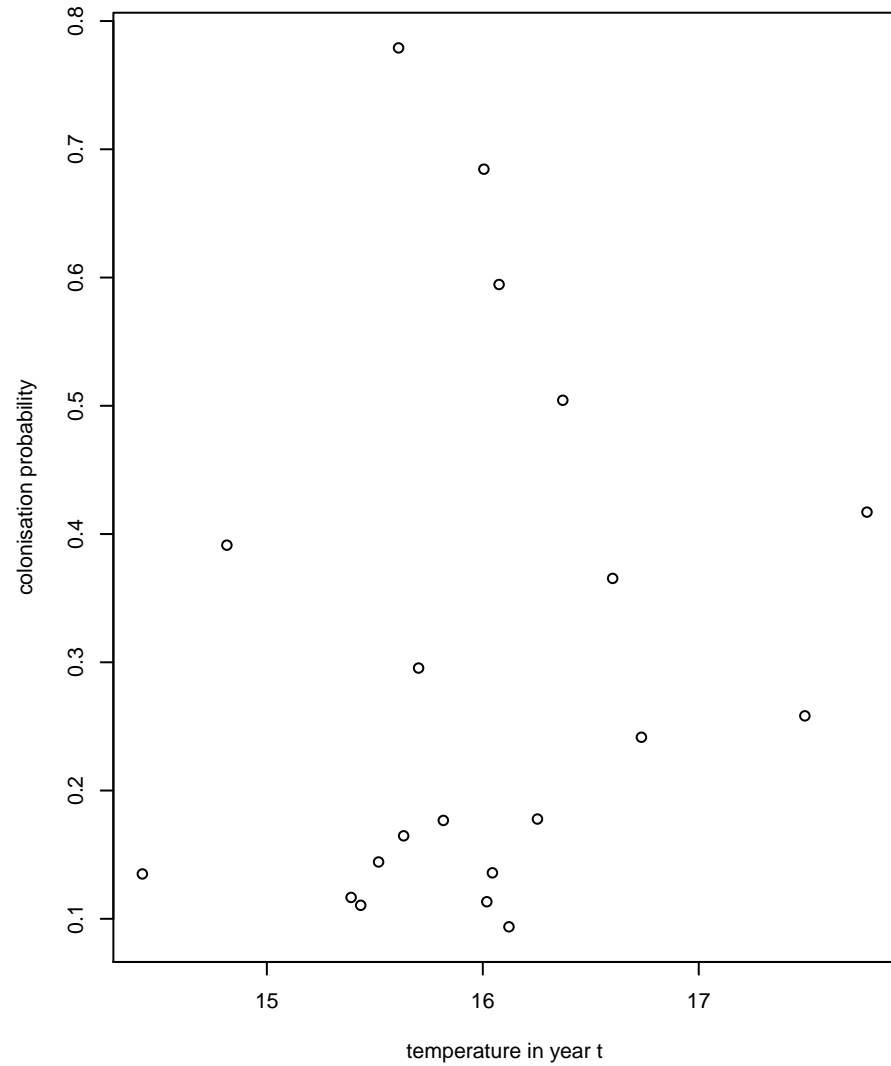

**Leucorrhinia dubia**

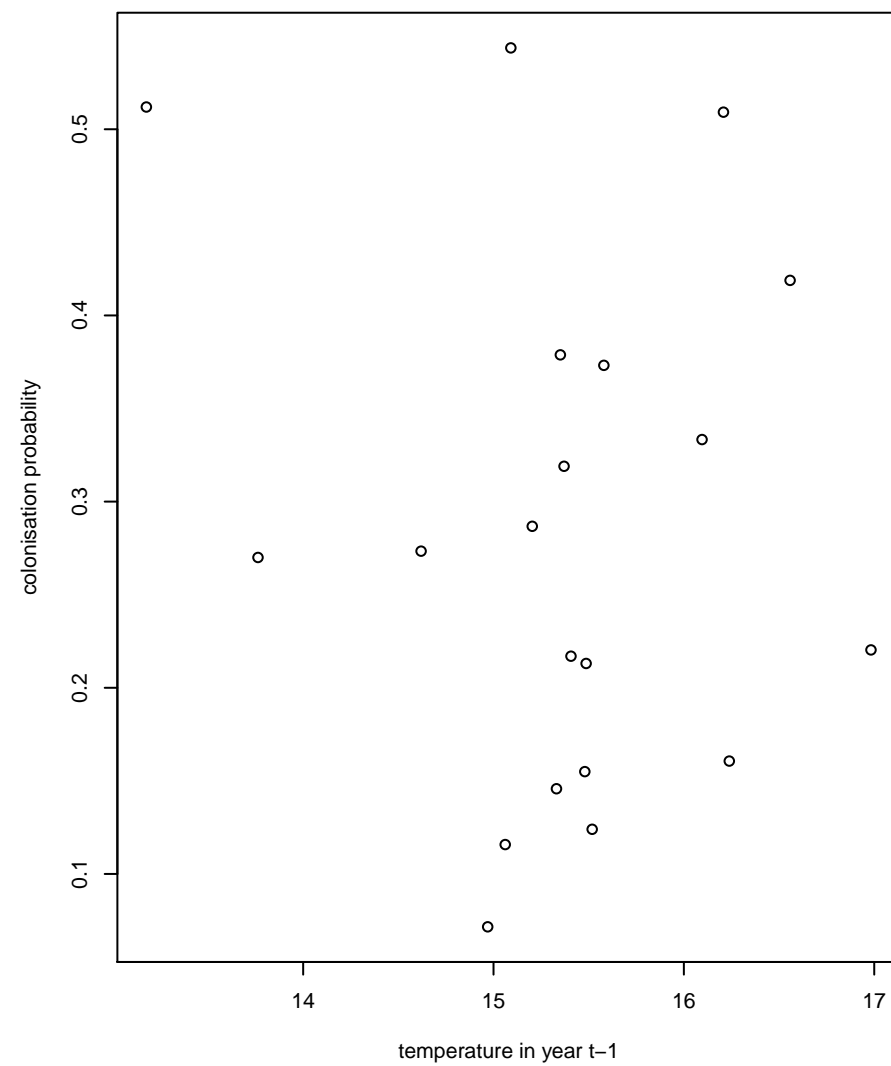

**Leucorrhinia dubia**

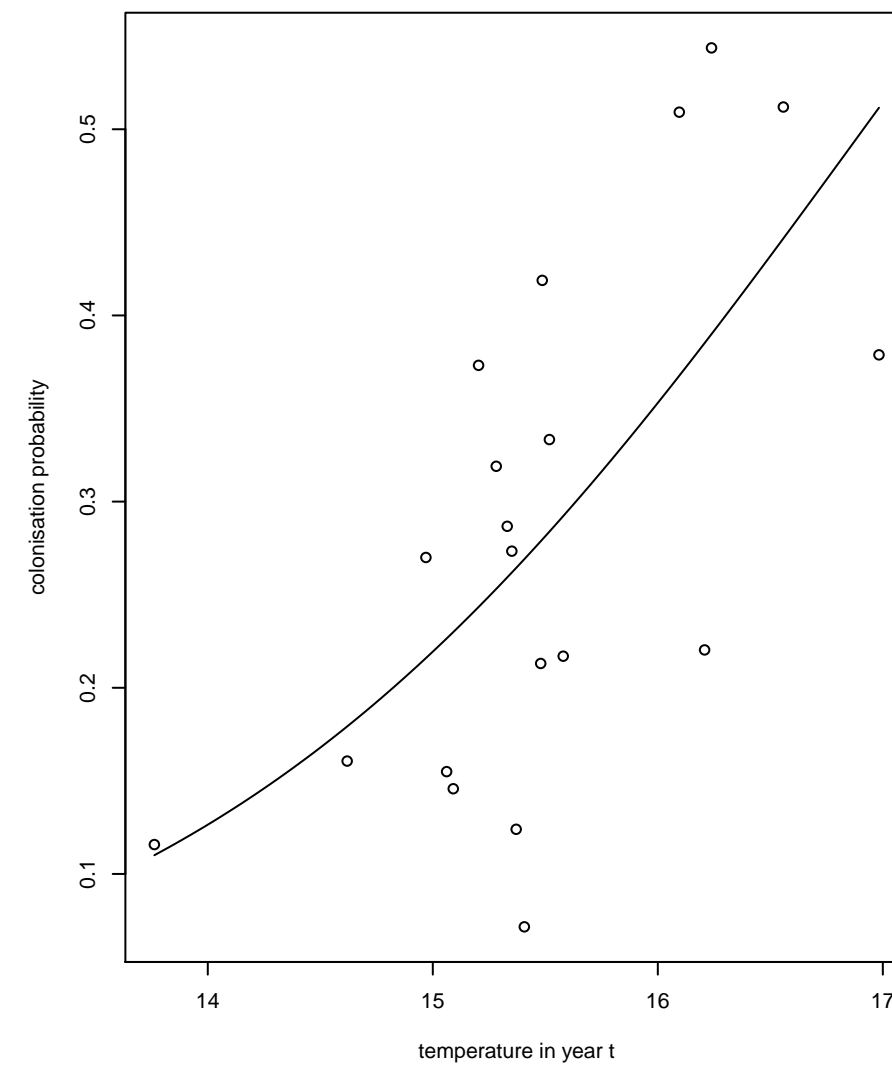

**Aeshna grandis**

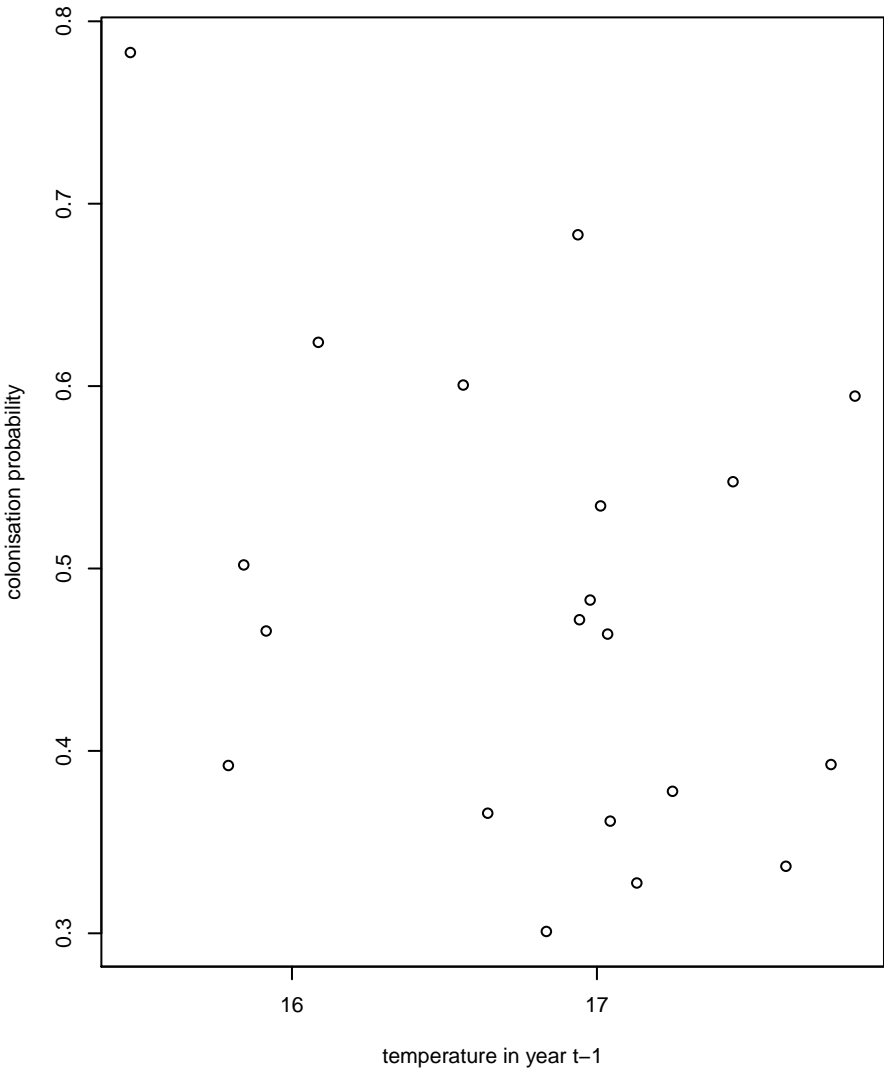

**Aeshna grandis**

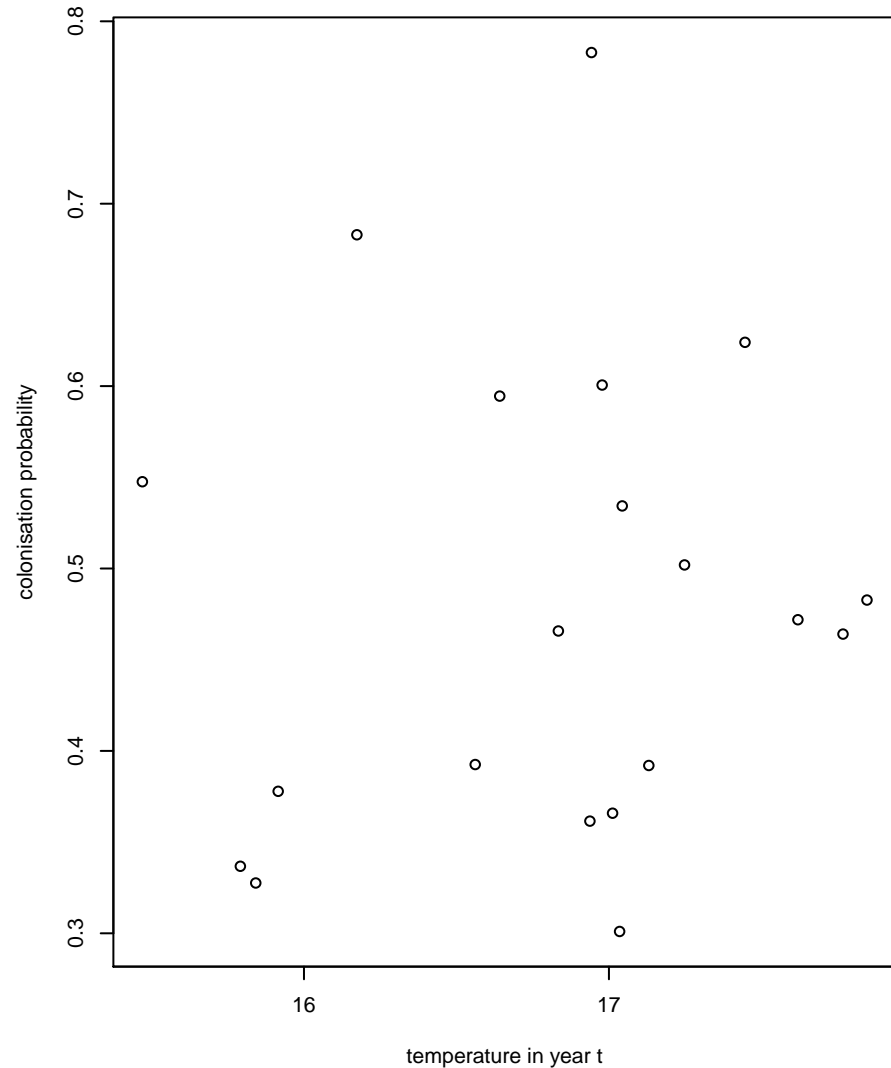

**Aeshna cyanea**

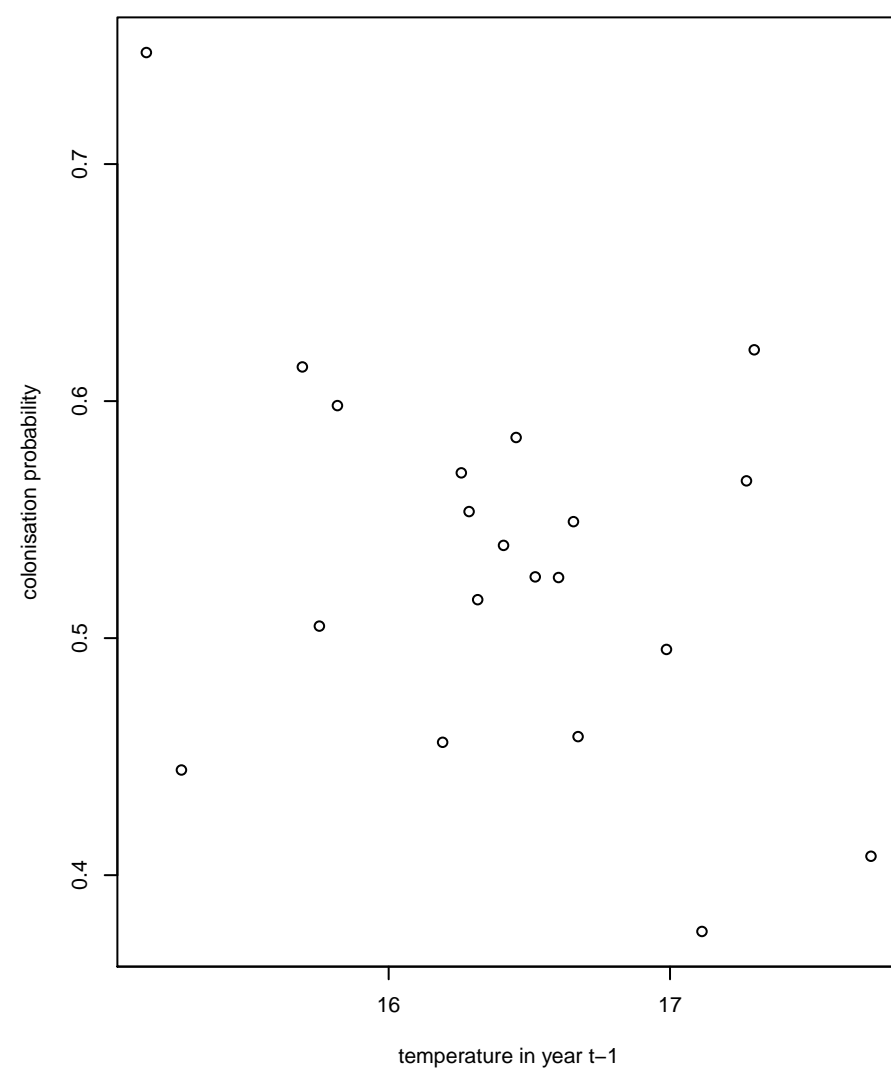

**Aeshna cyanea**

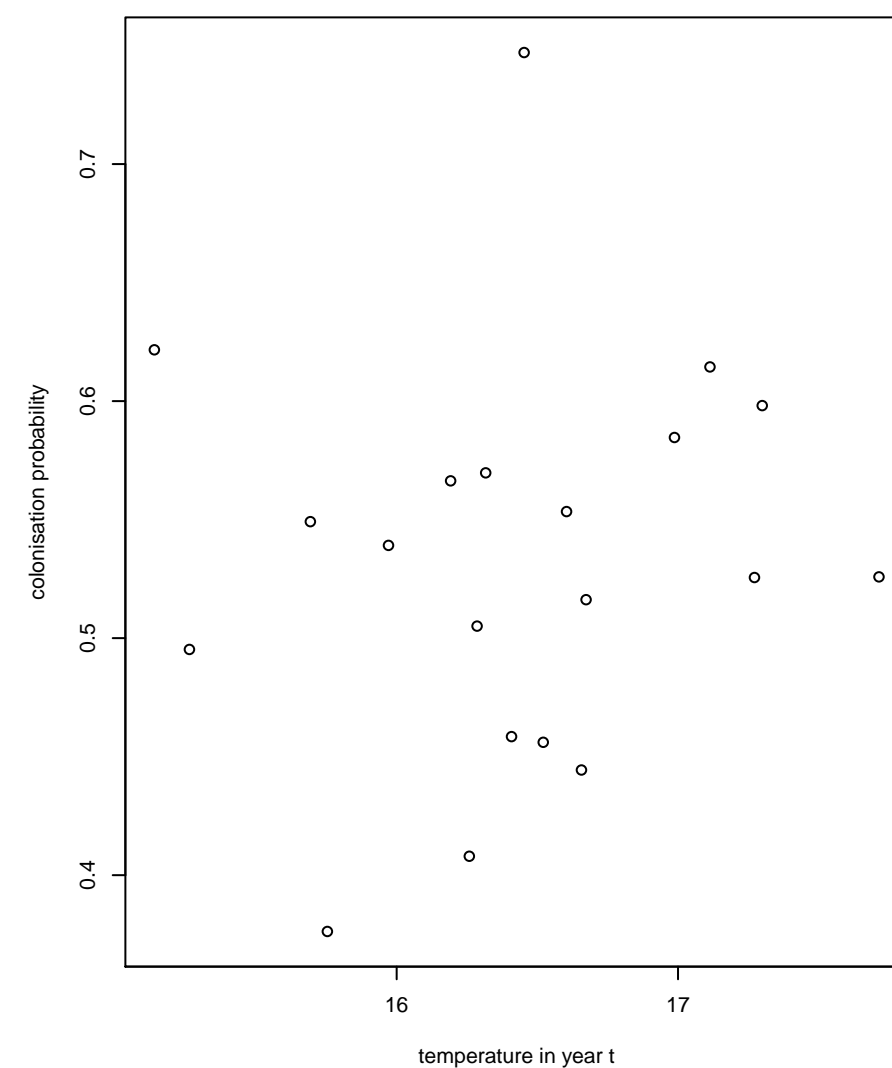

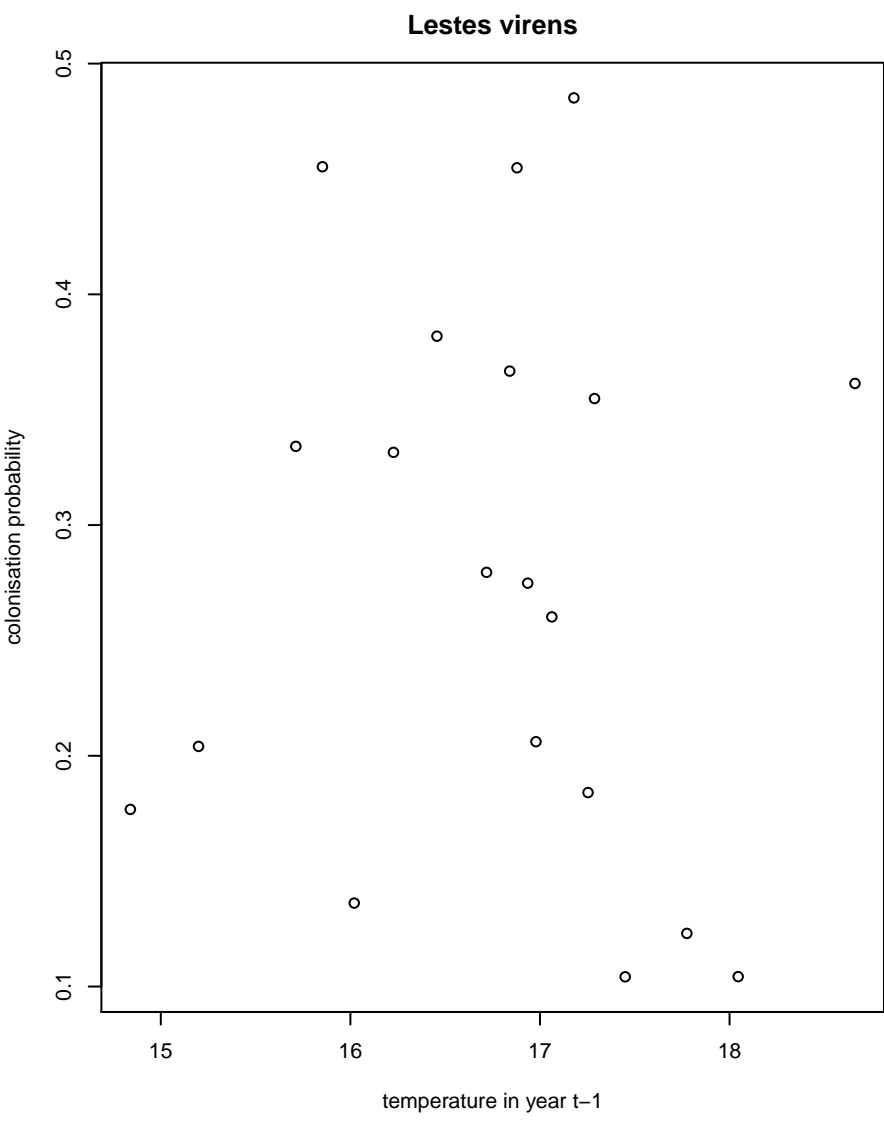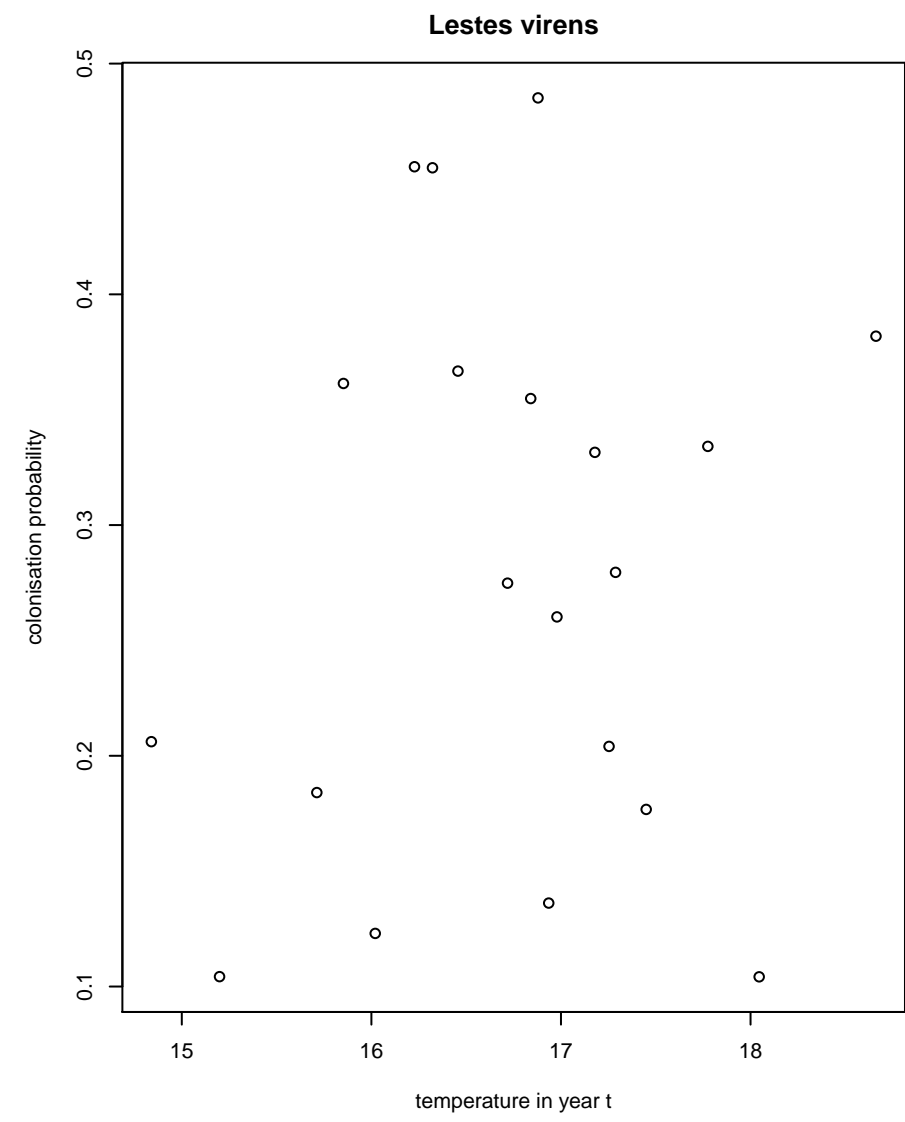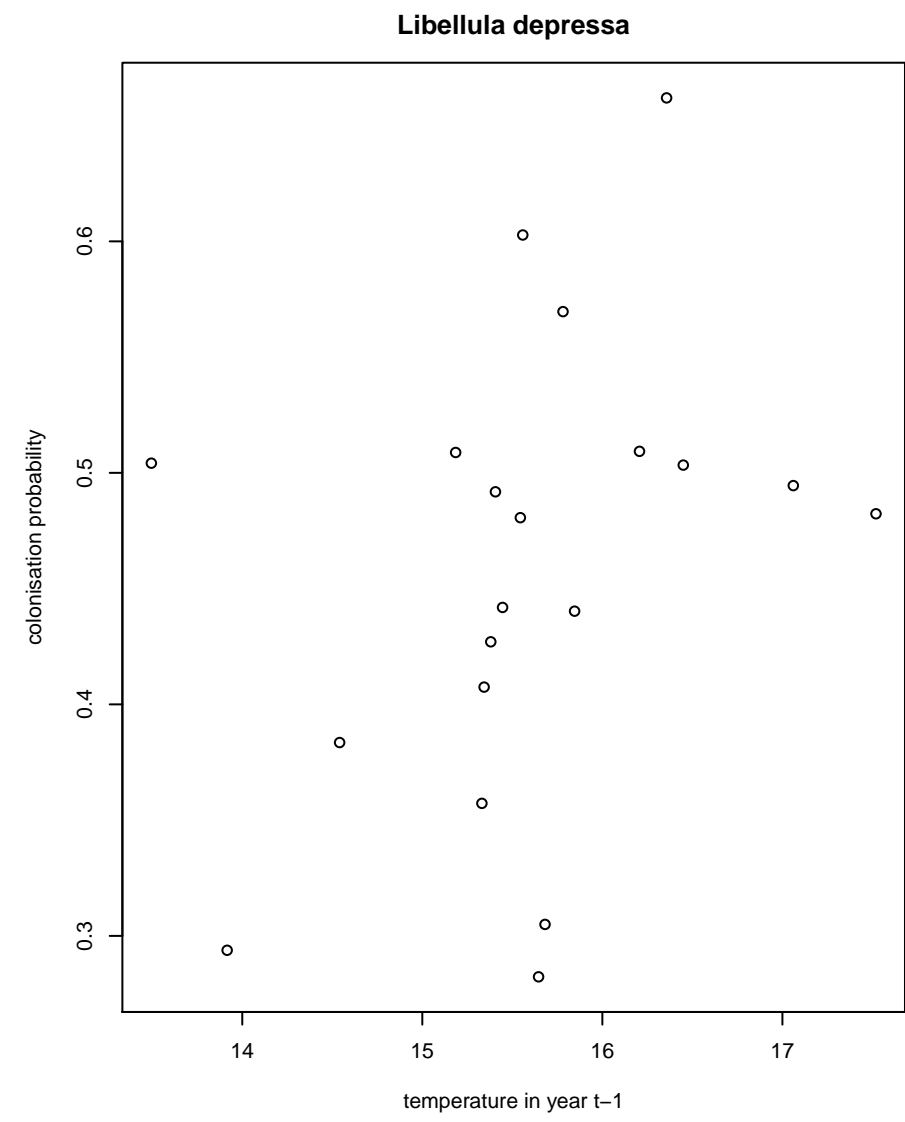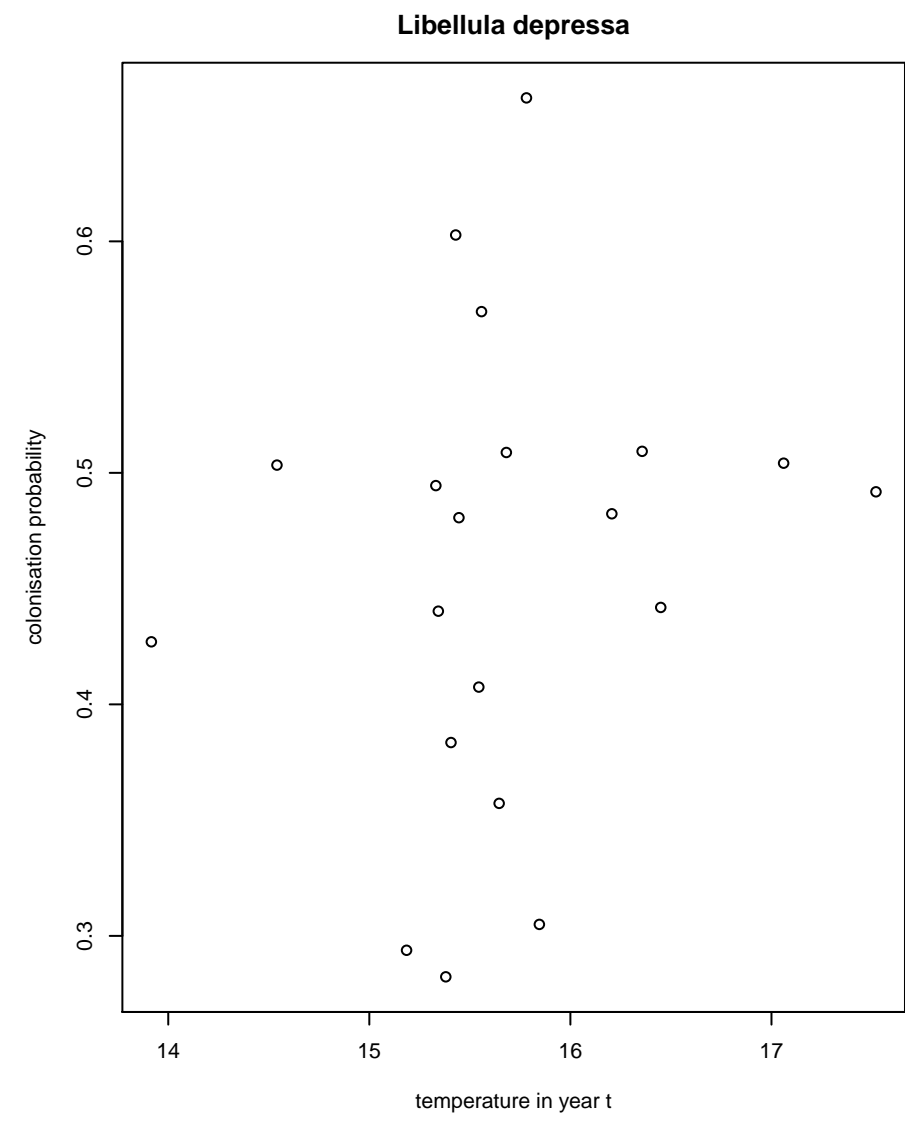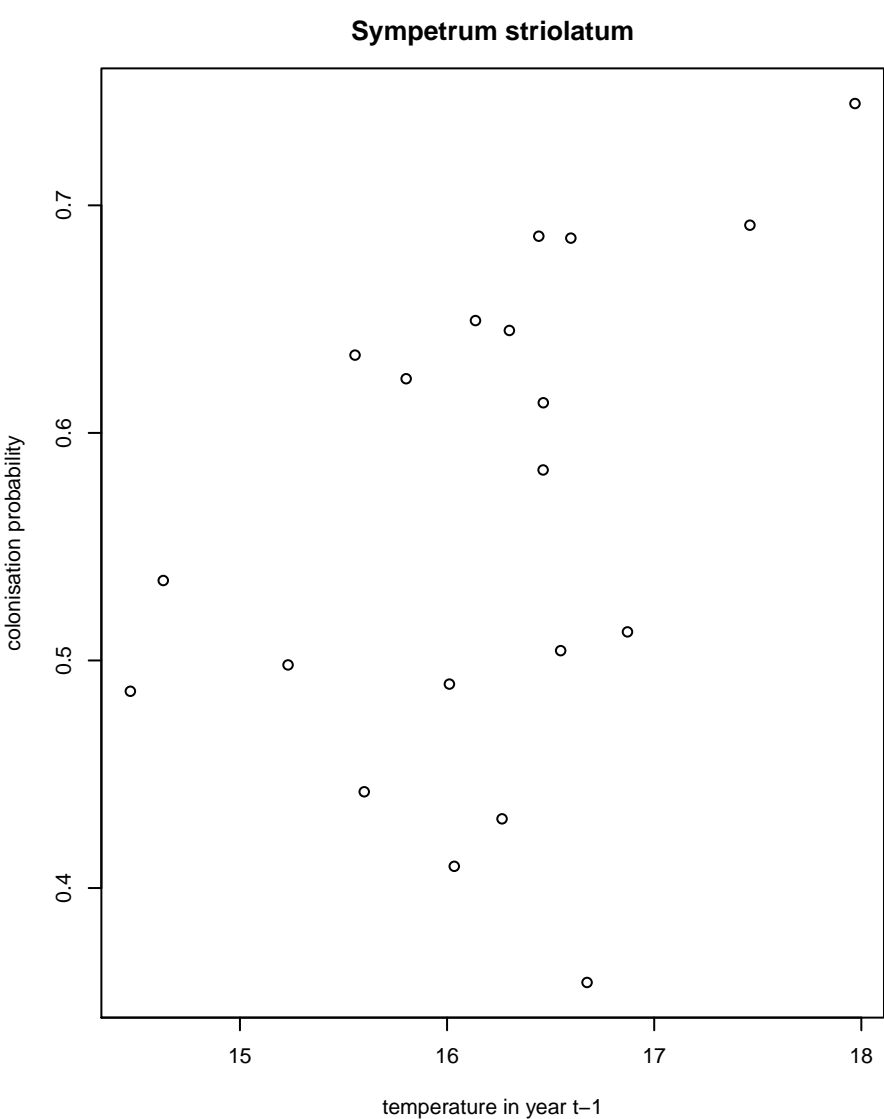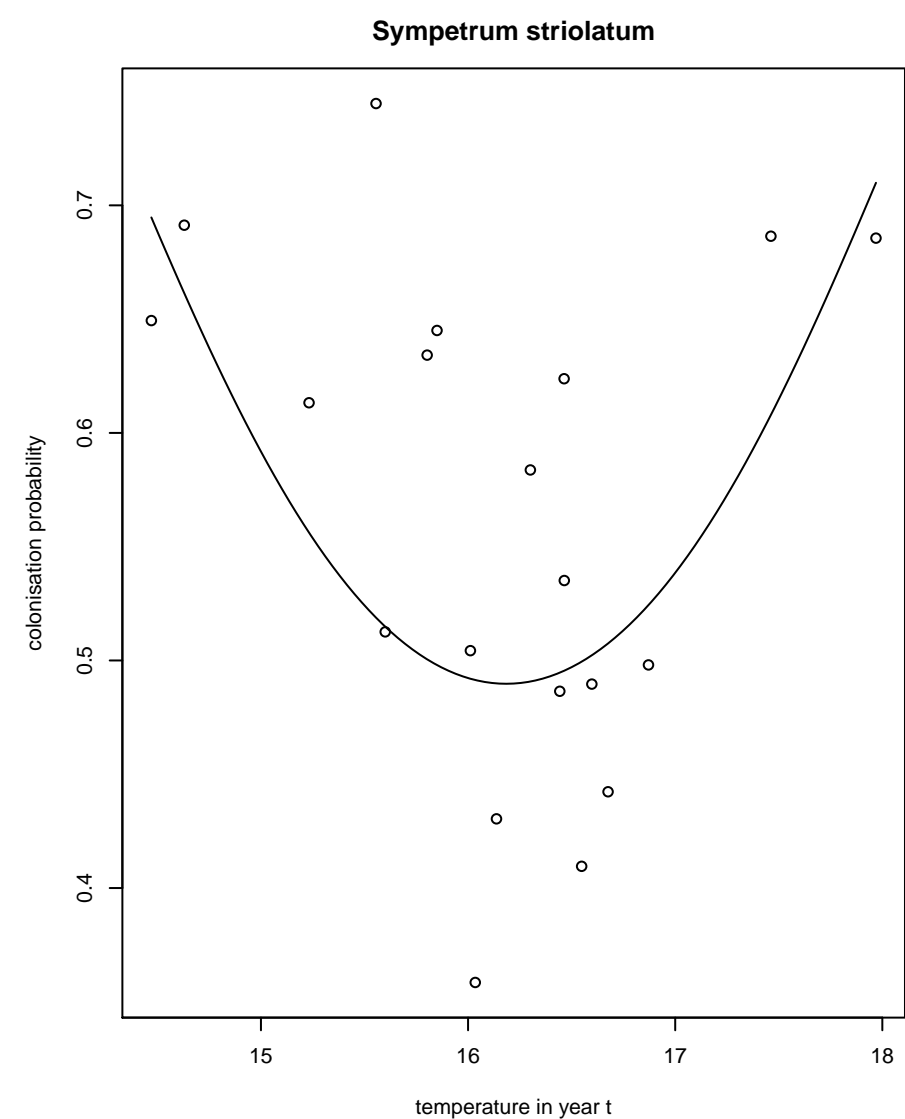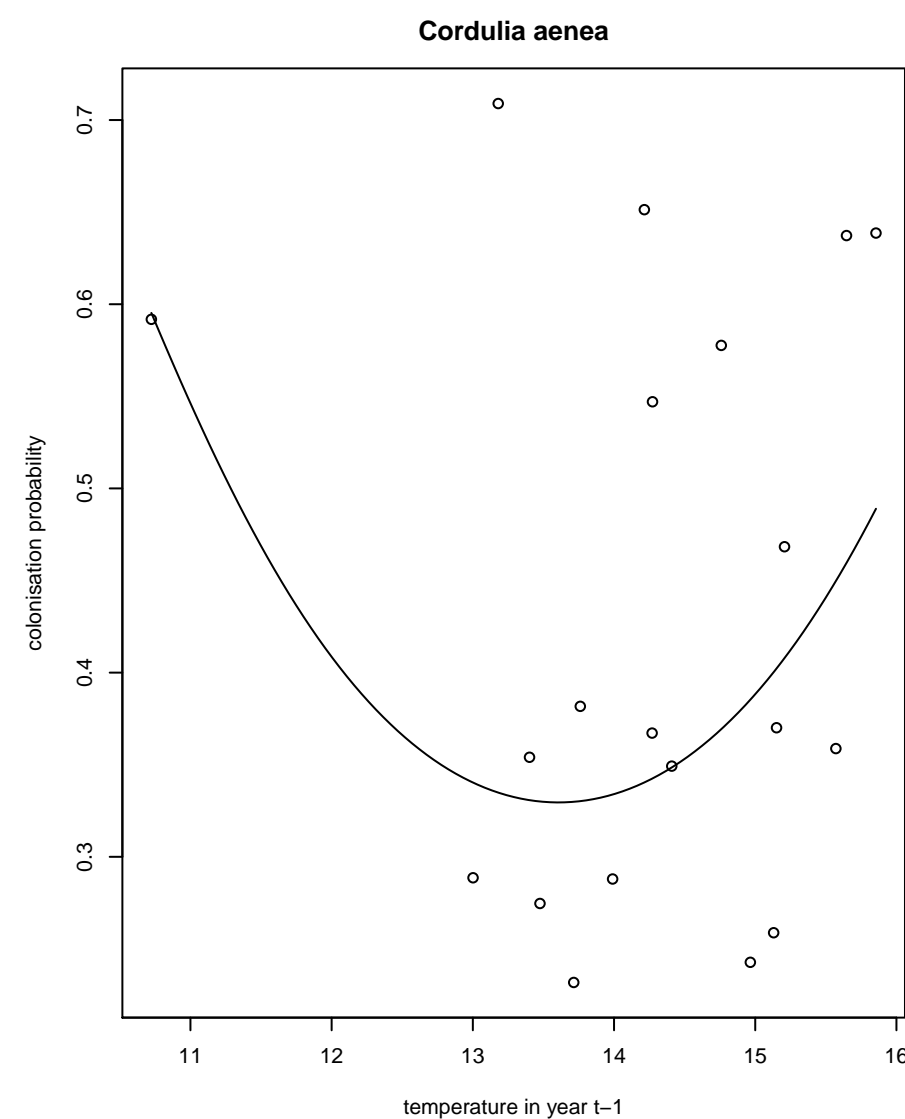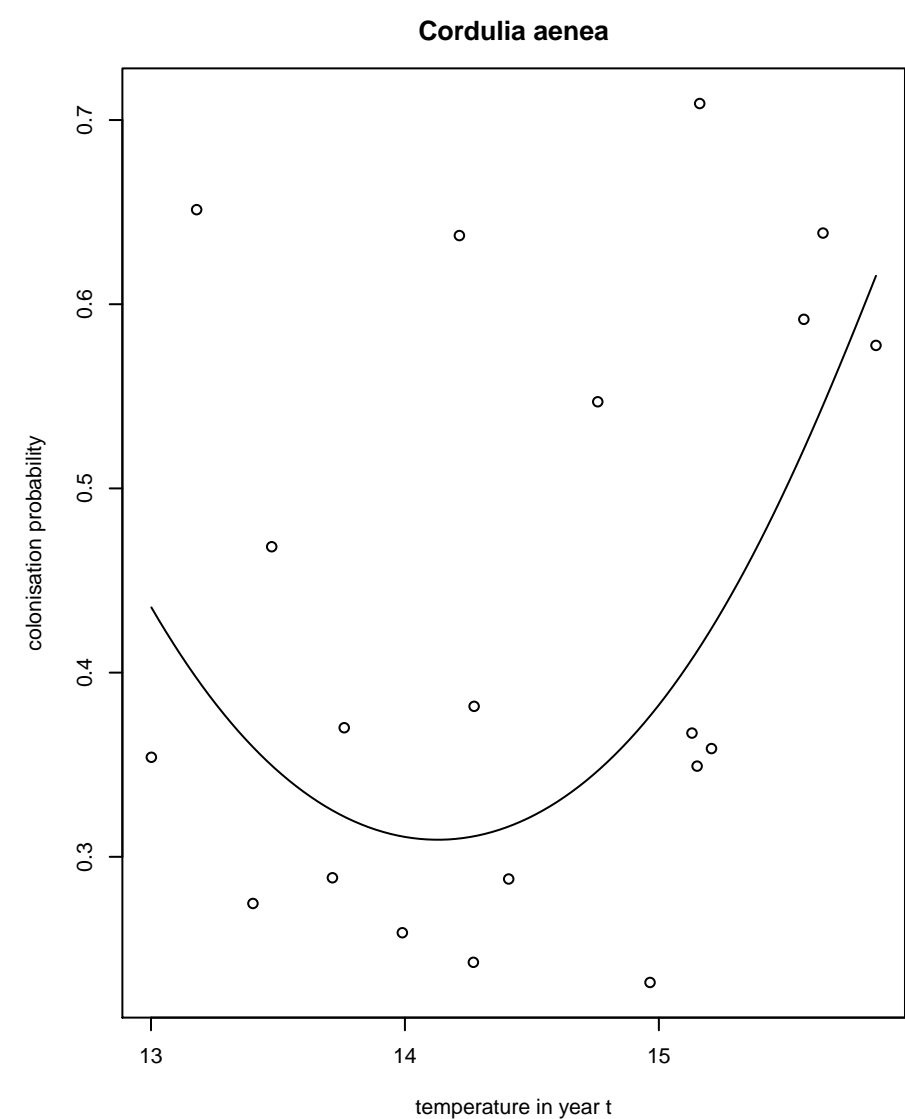

**Aeshna viridis**

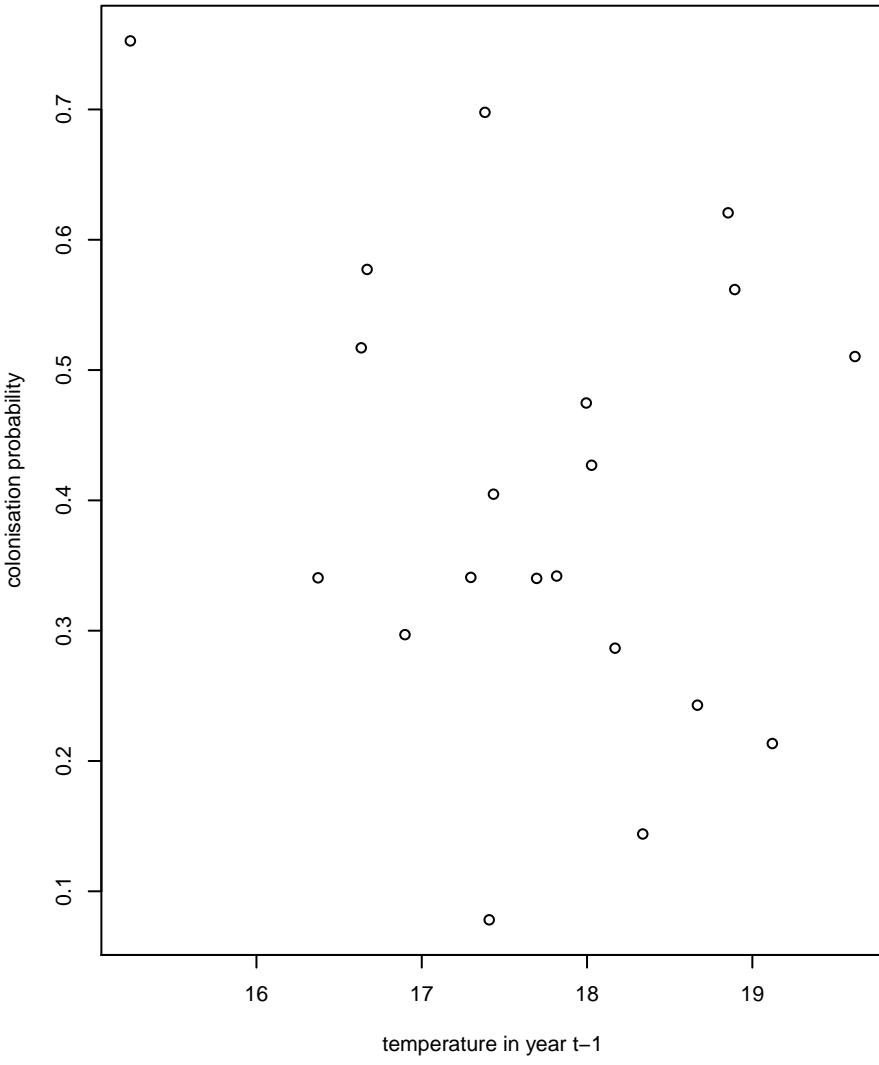

**Aeshna viridis**

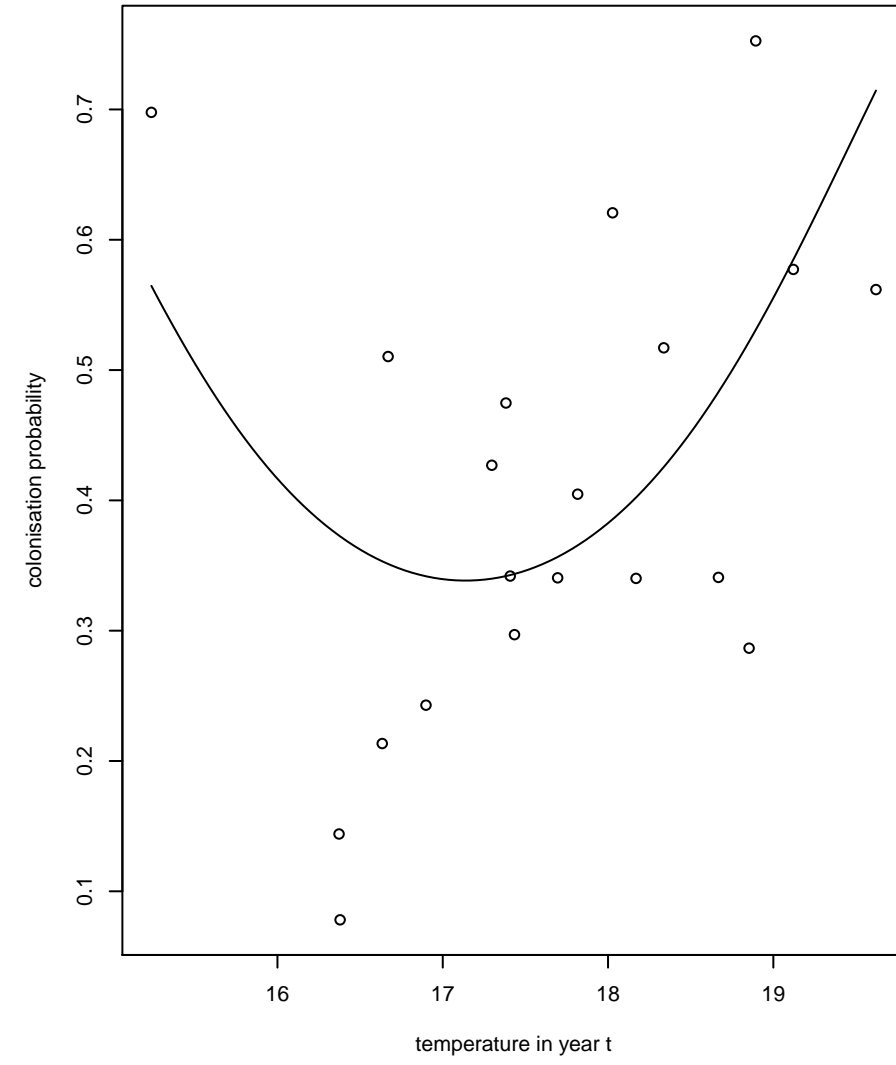

**Sympetrum flaveolum**

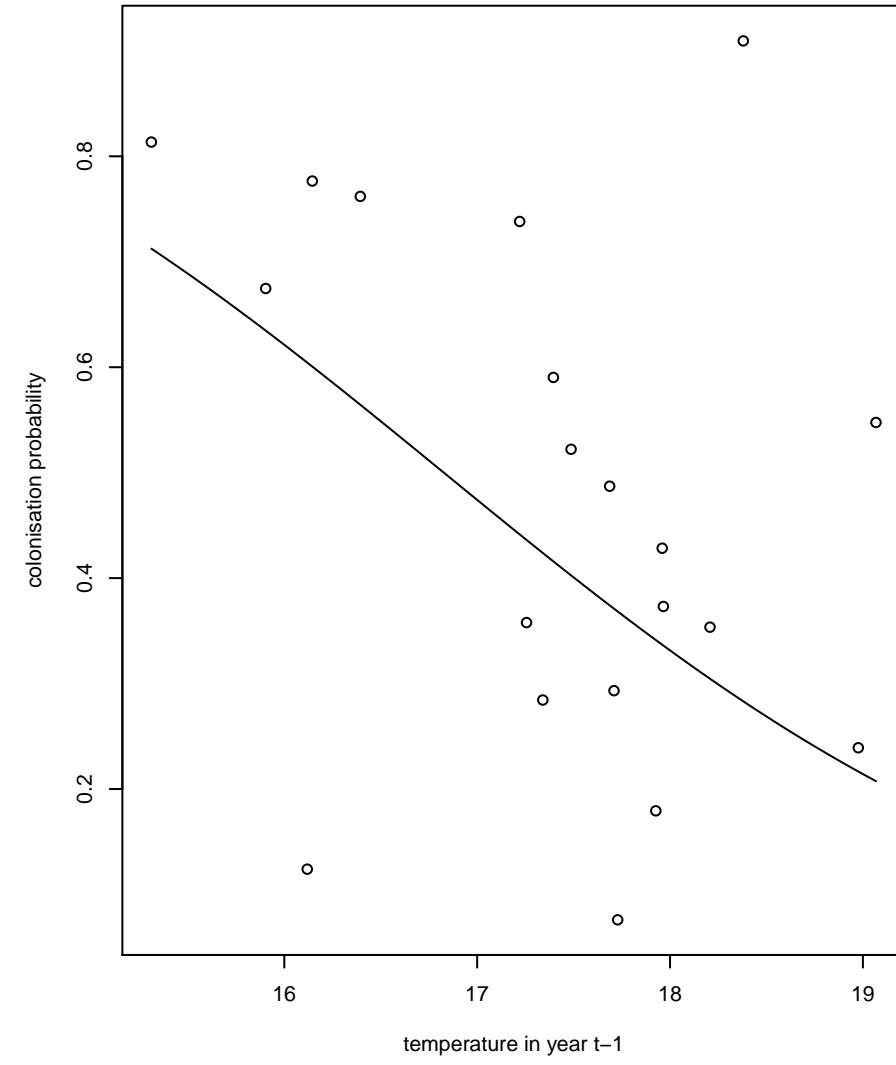

**Sympetrum flaveolum**

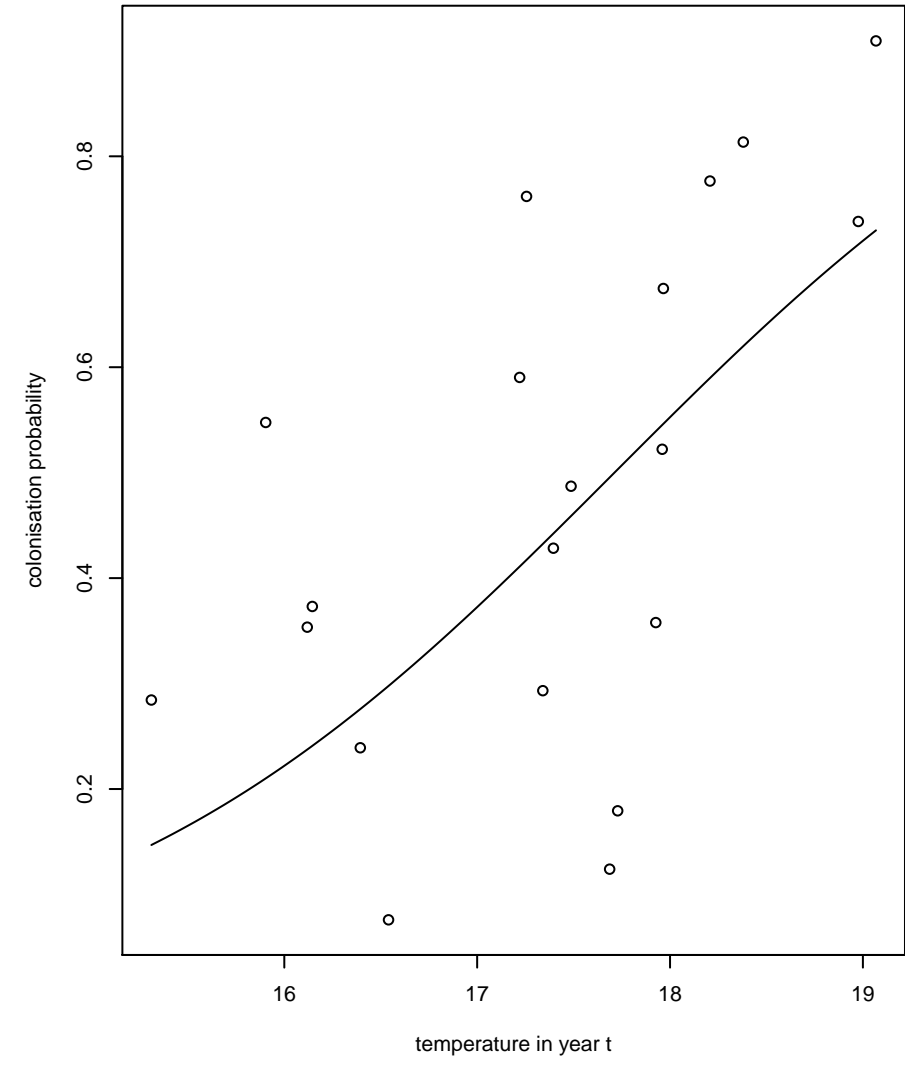

**Coenagrion lunulatum**

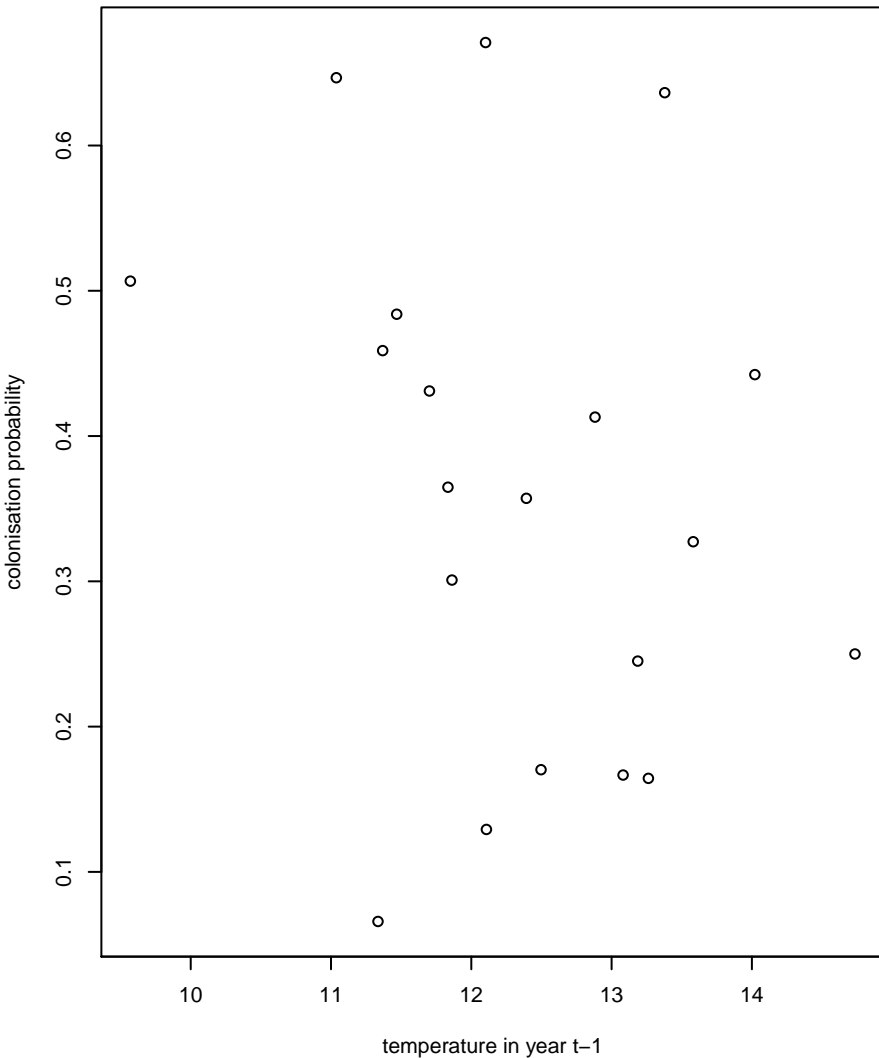

**Coenagrion lunulatum**

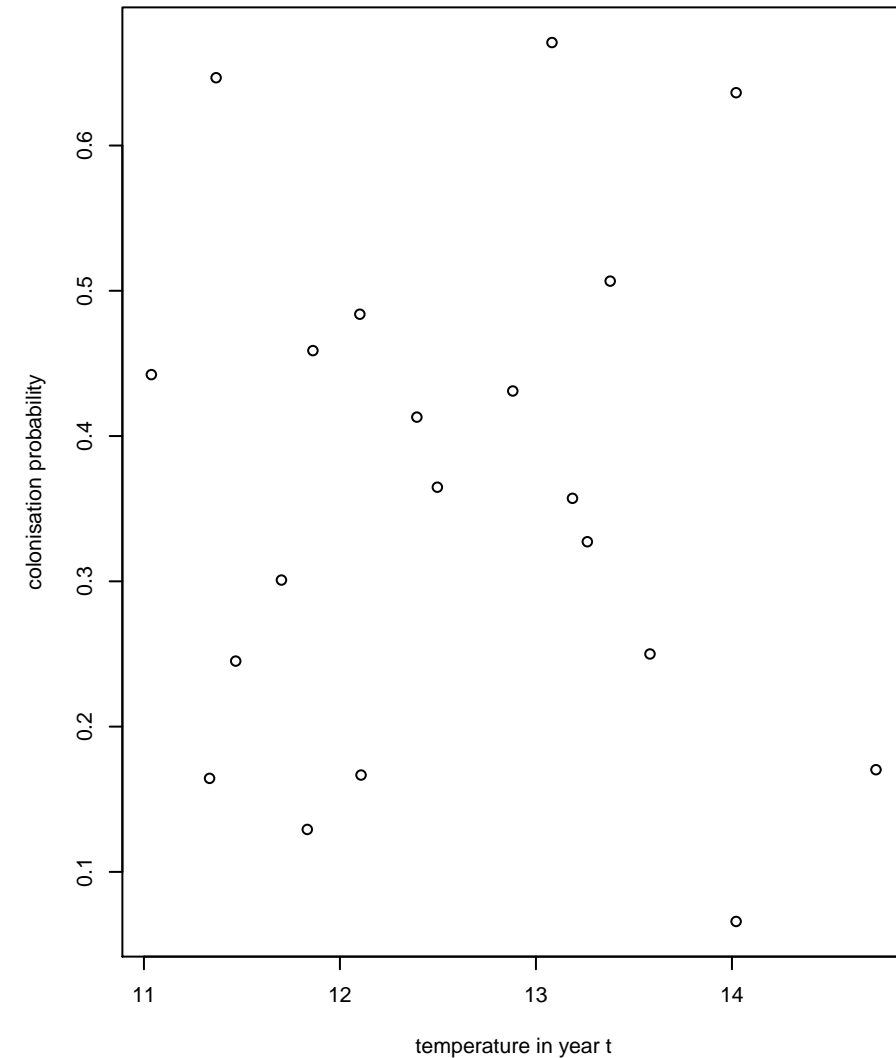

**Lestes dryas**

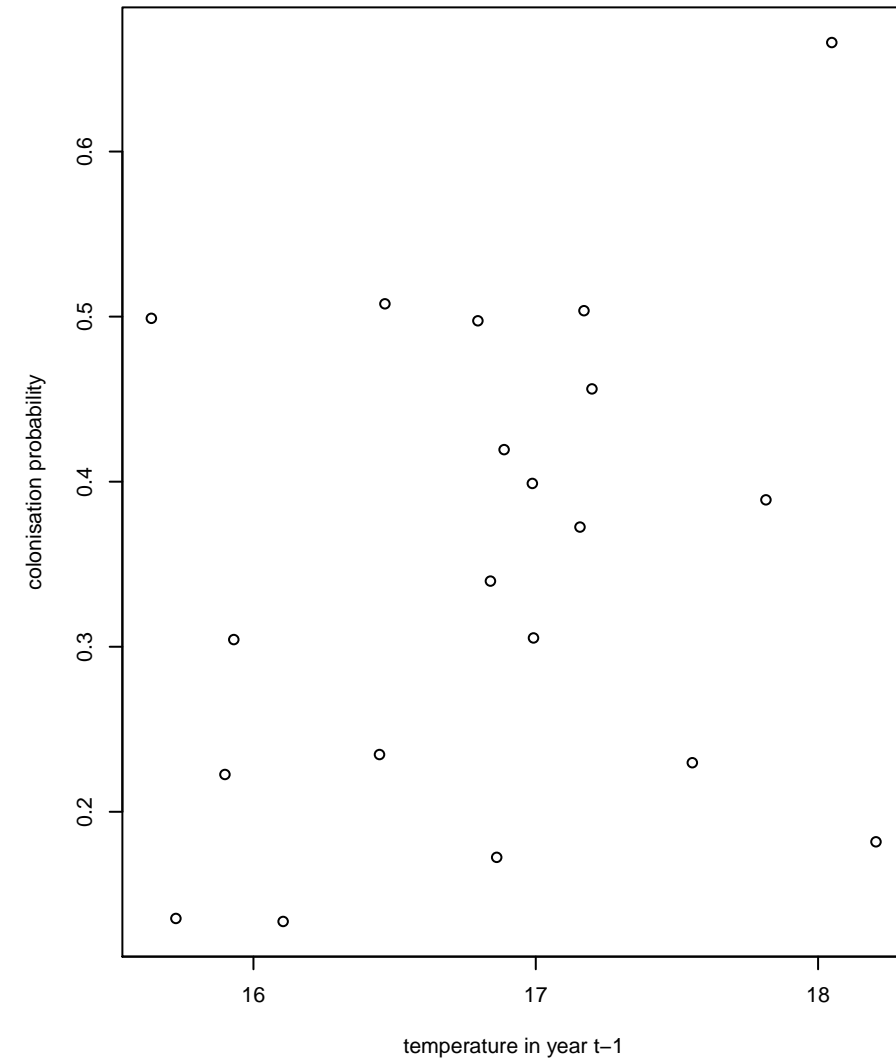

**Lestes dryas**

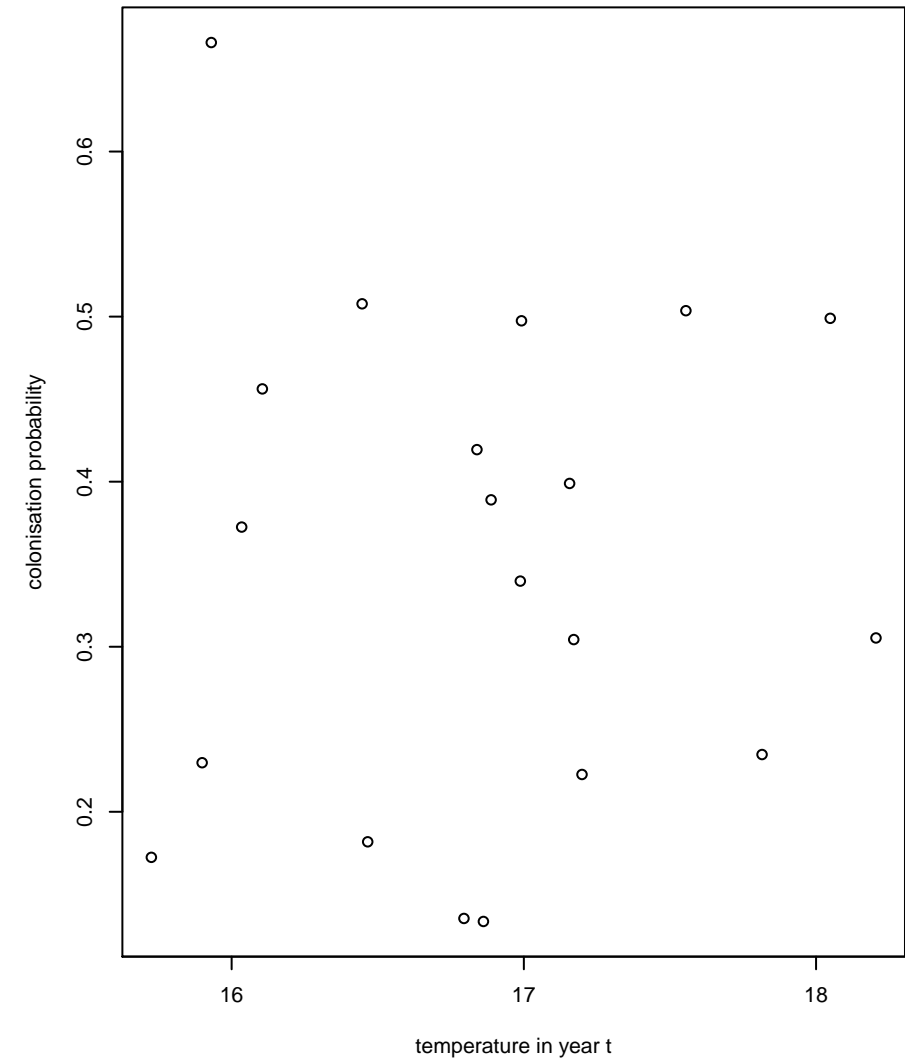



**Sympecma fusca**

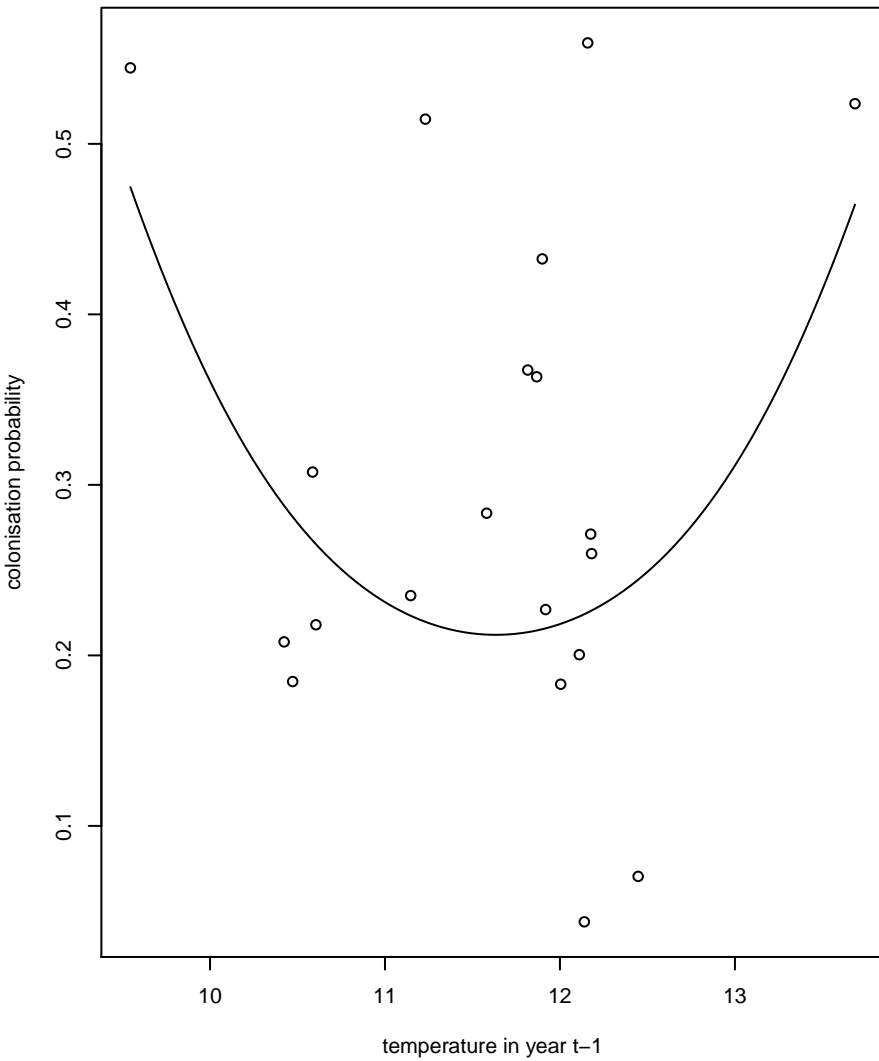

**Sympecma fusca**

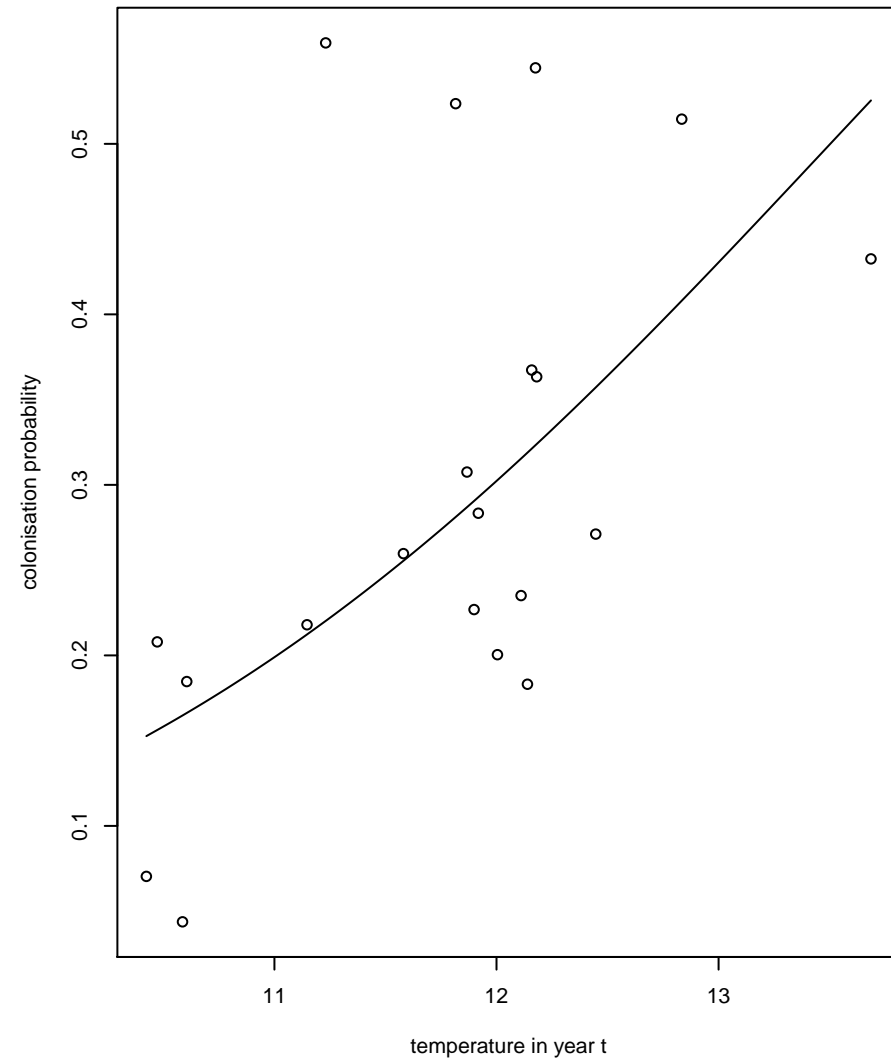

**Aeshna juncea**

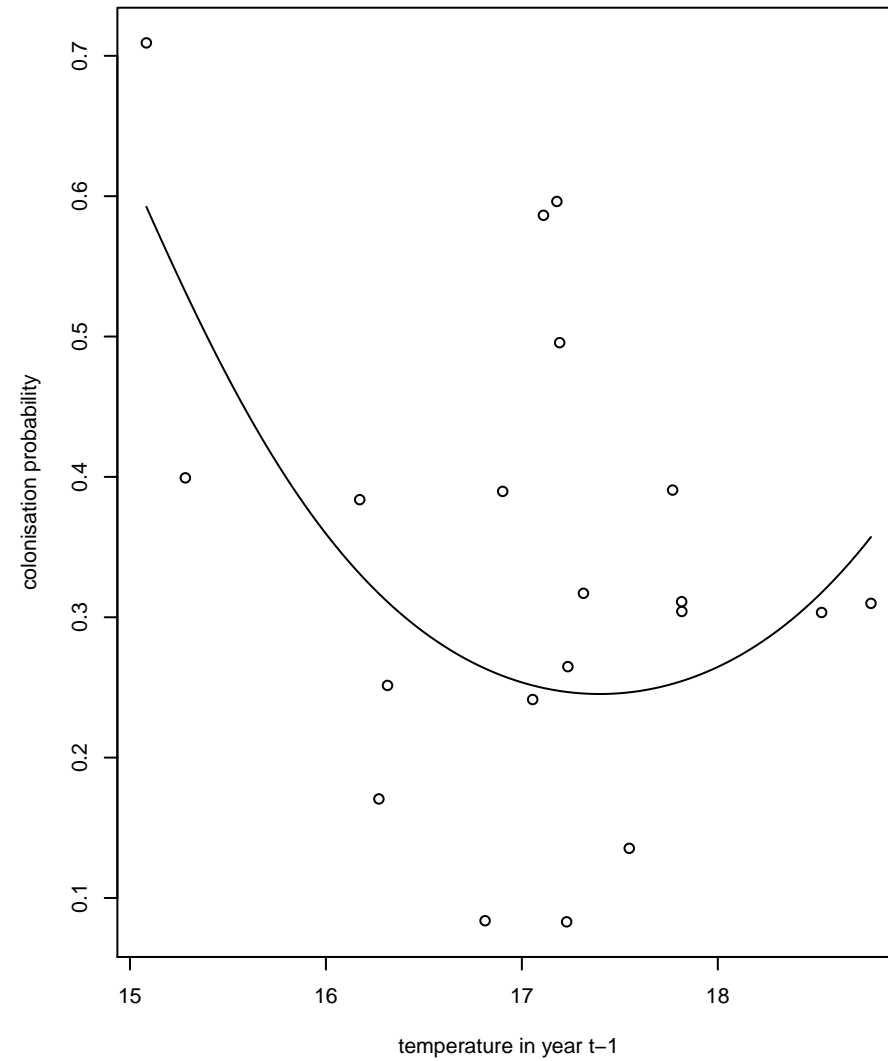

**Aeshna juncea**

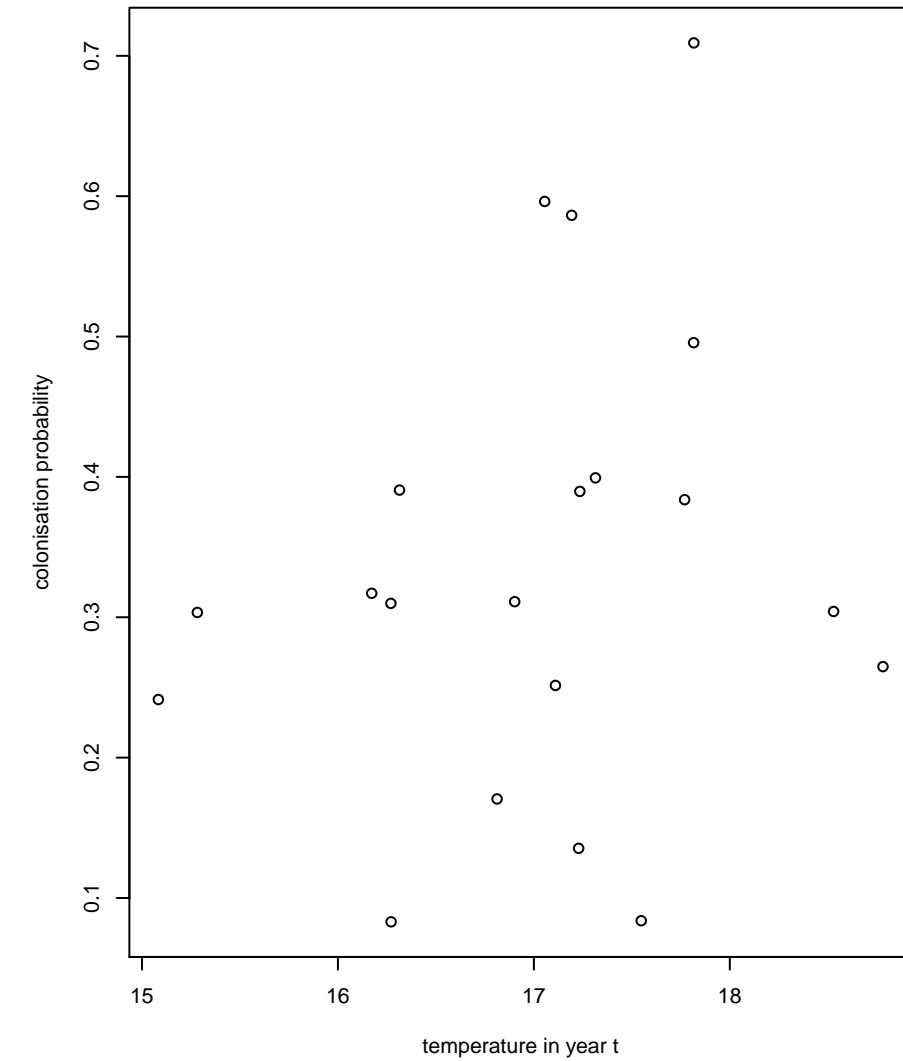

**Somatochlora metallica**

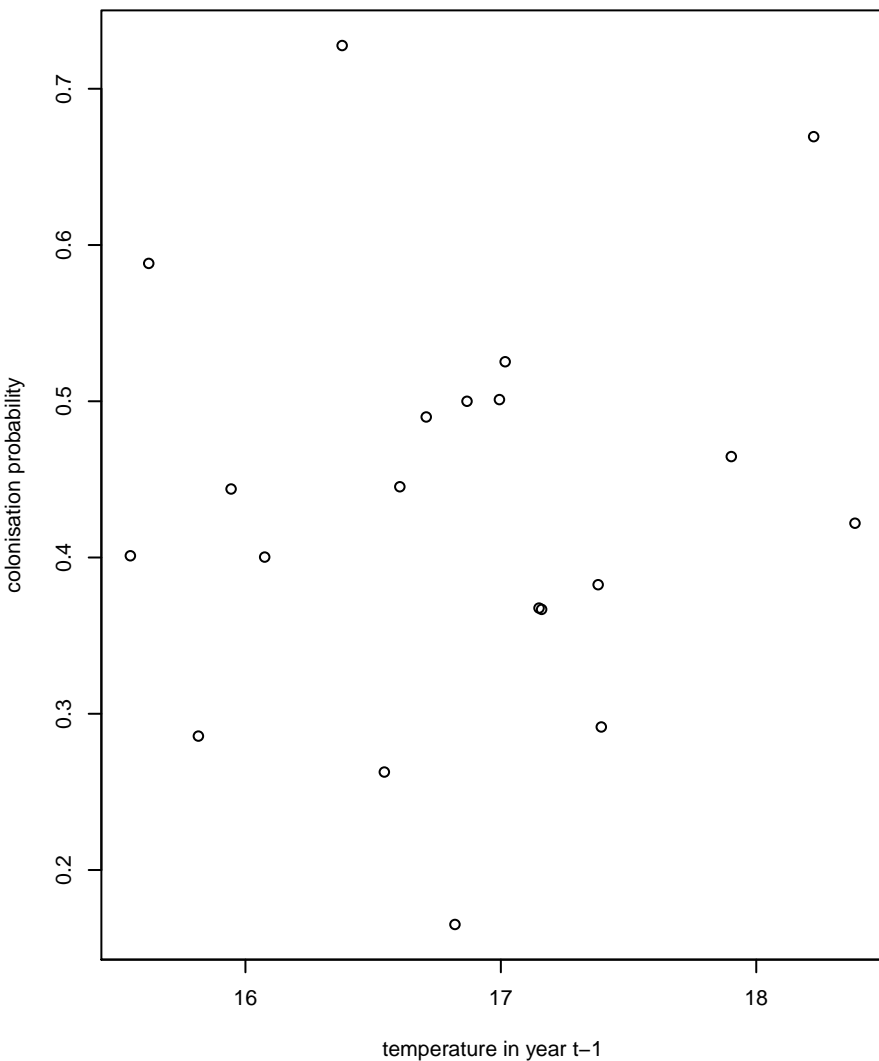

**Somatochlora metallica**

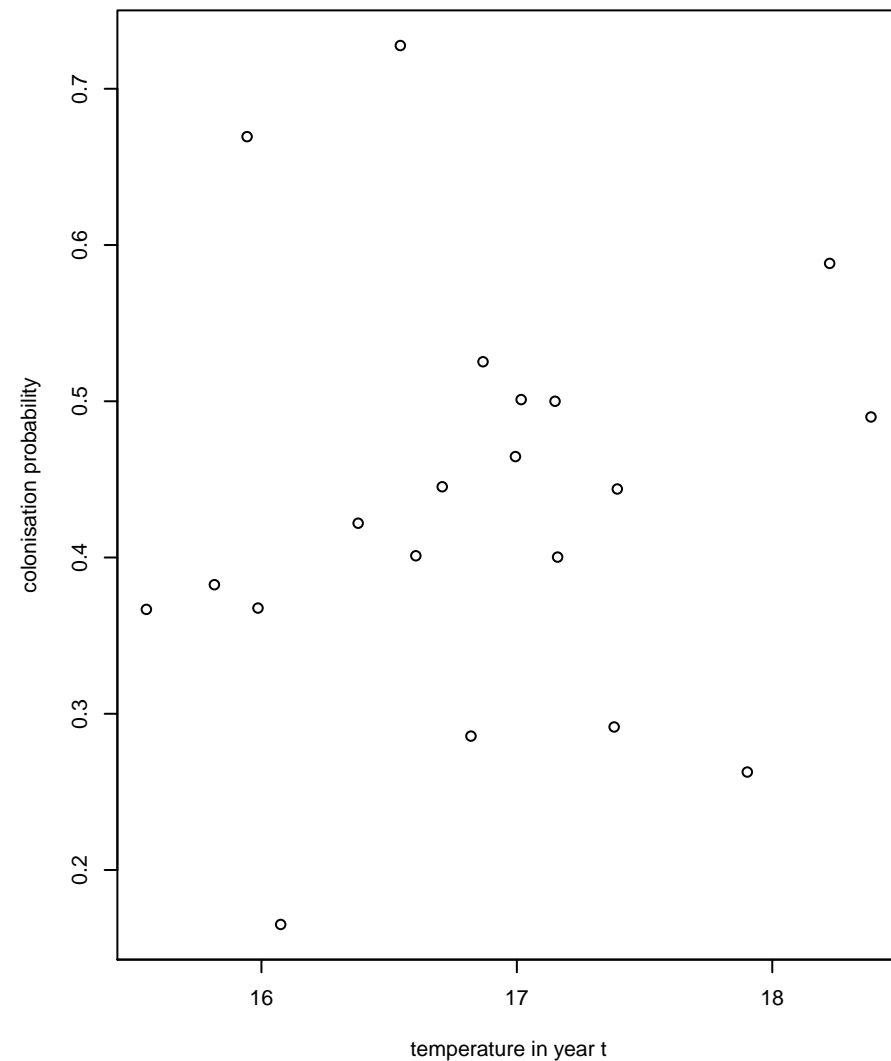

**Anax imperator**

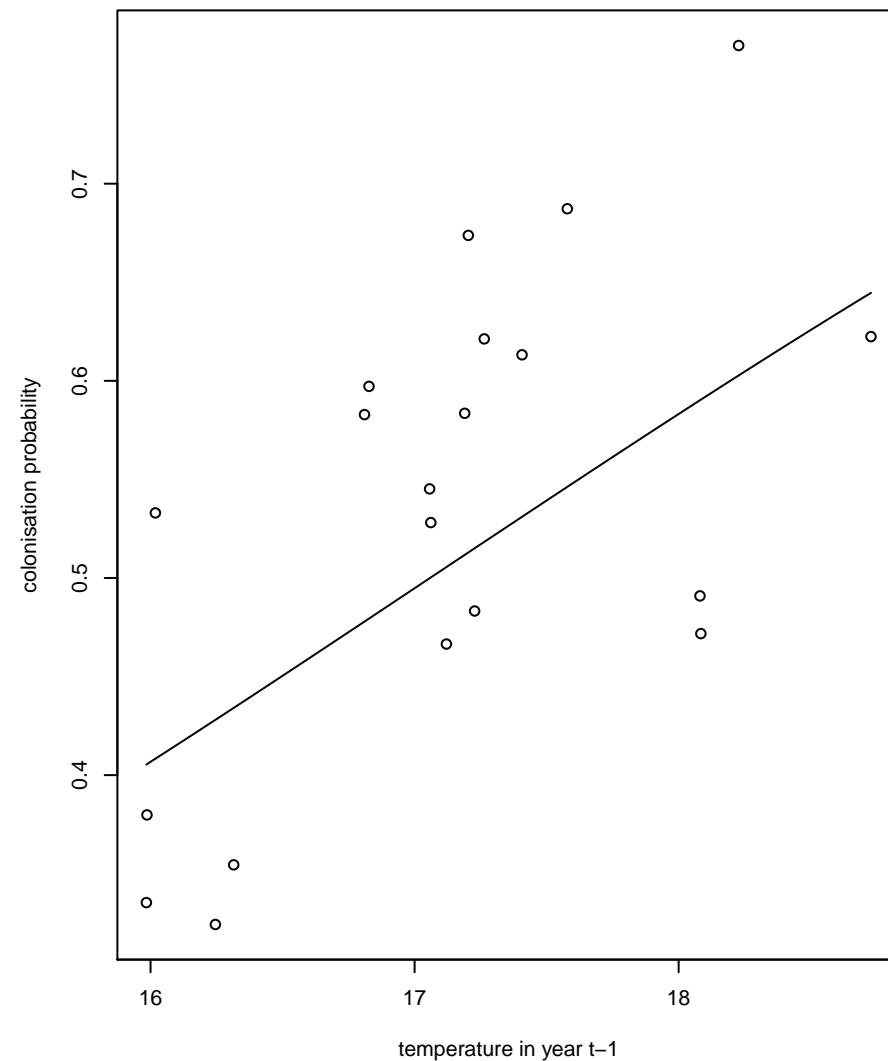

**Anax imperator**

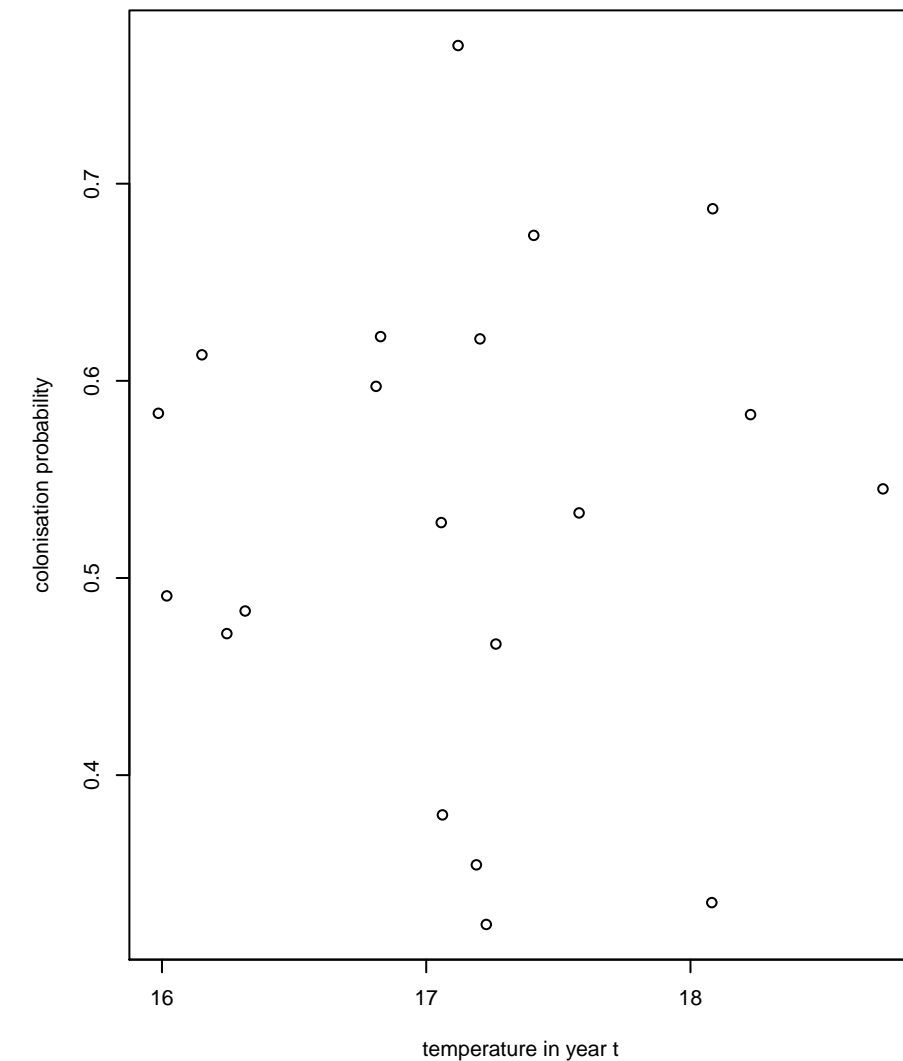

**Erythromma viridulum**

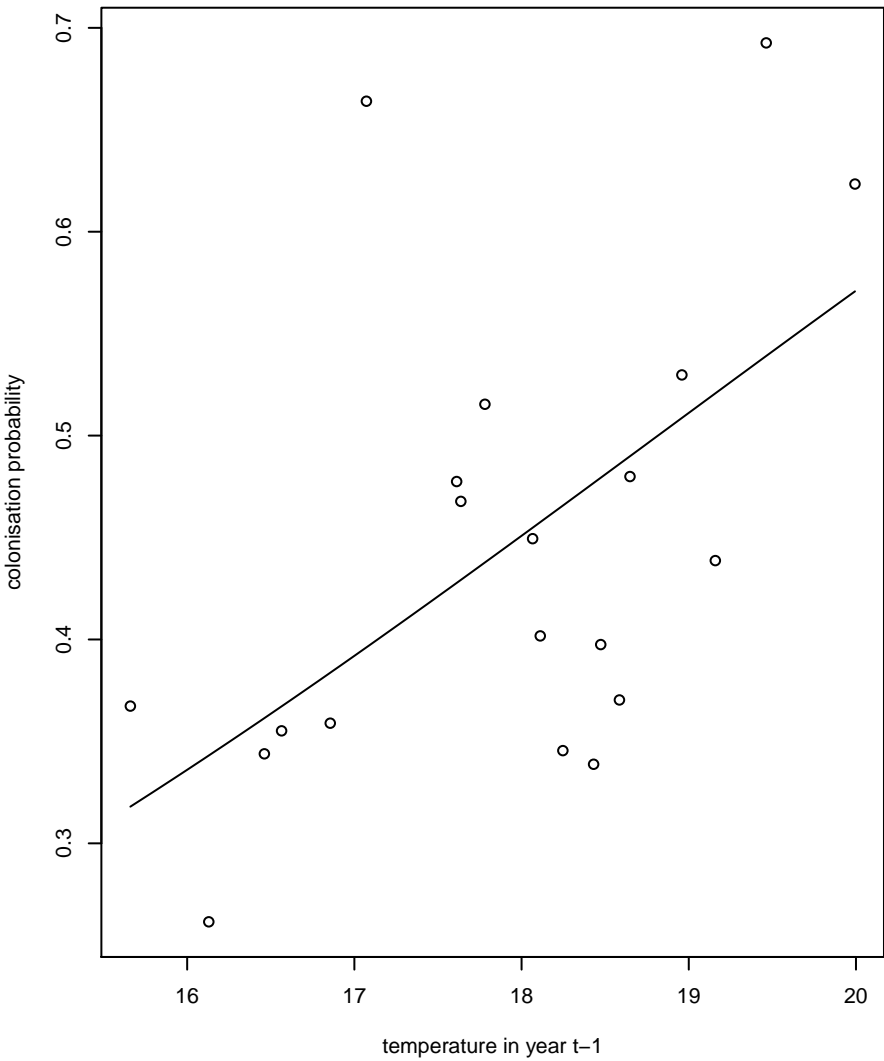

**Erythromma viridulum**

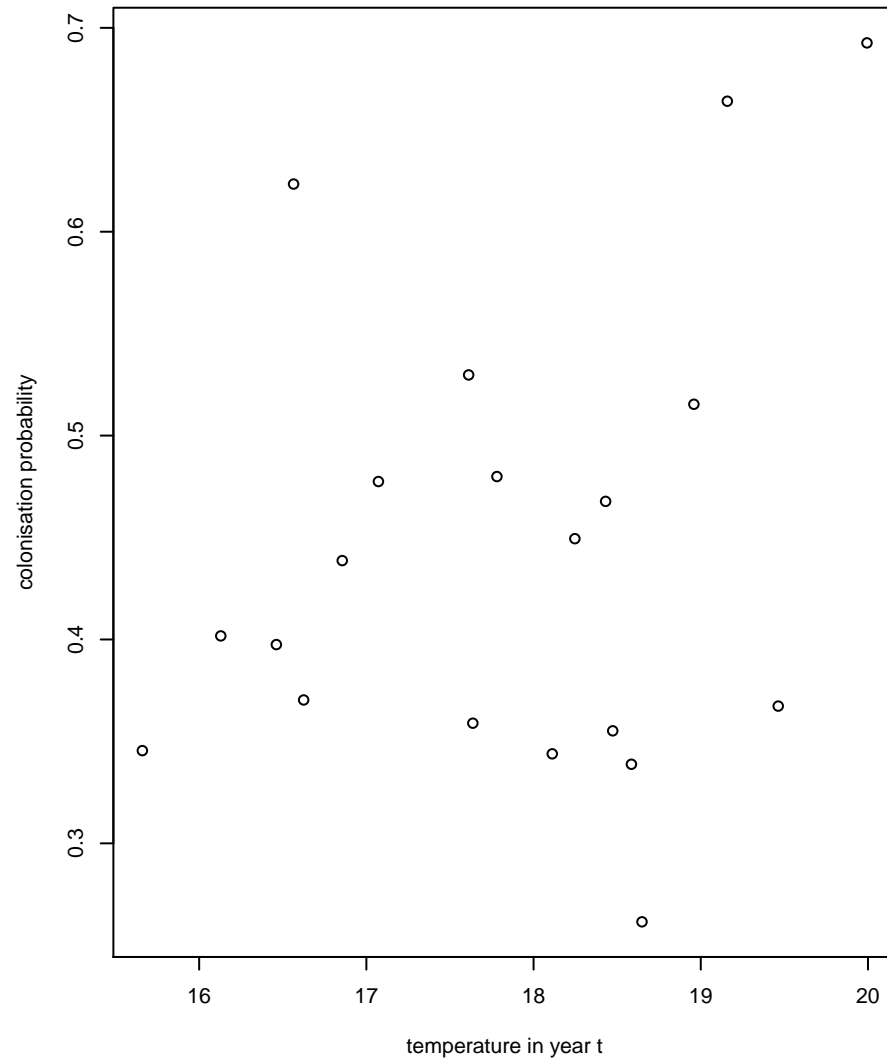

**Platycnemis pennipes**

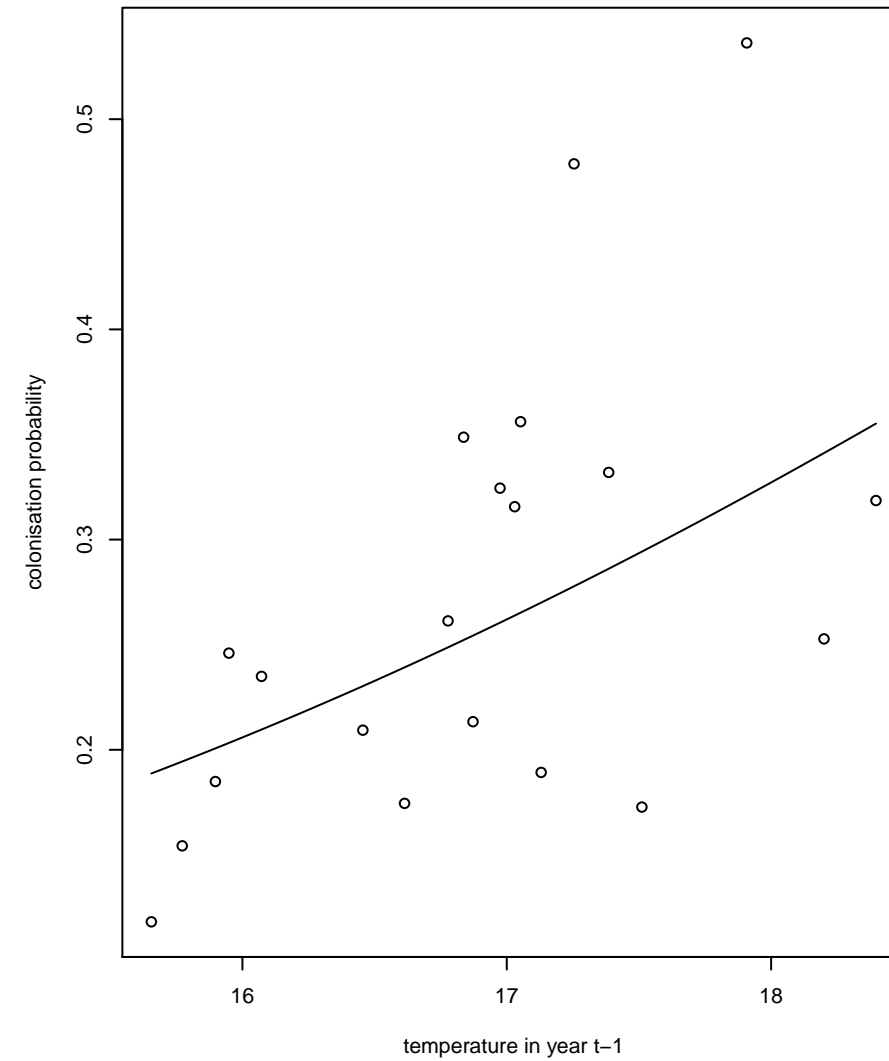

**Platycnemis pennipes**

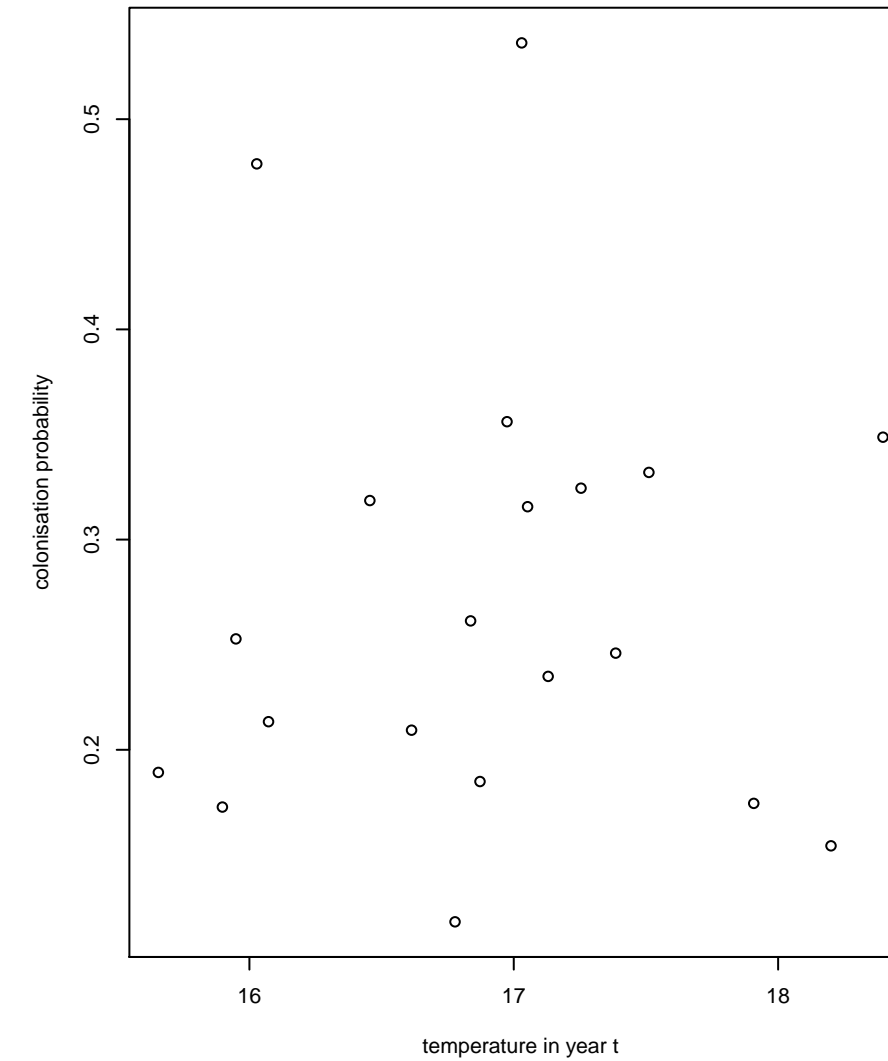

**Libellula fulva**

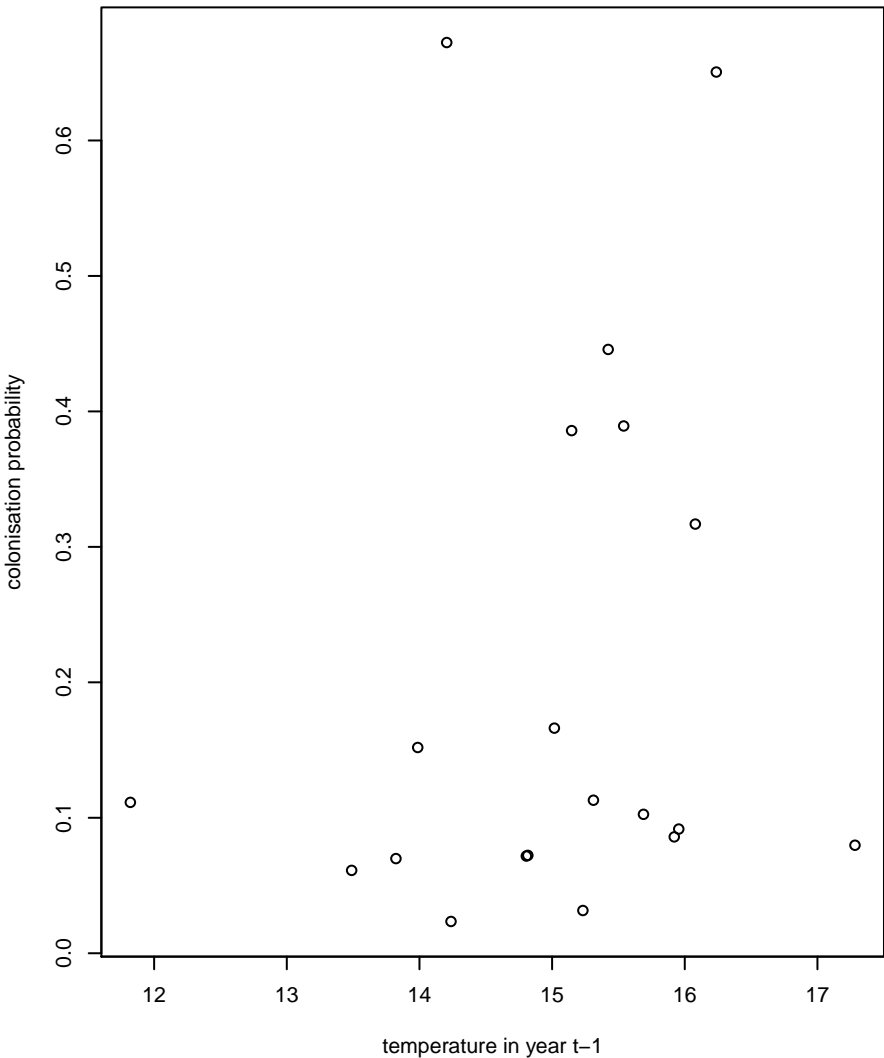

**Libellula fulva**

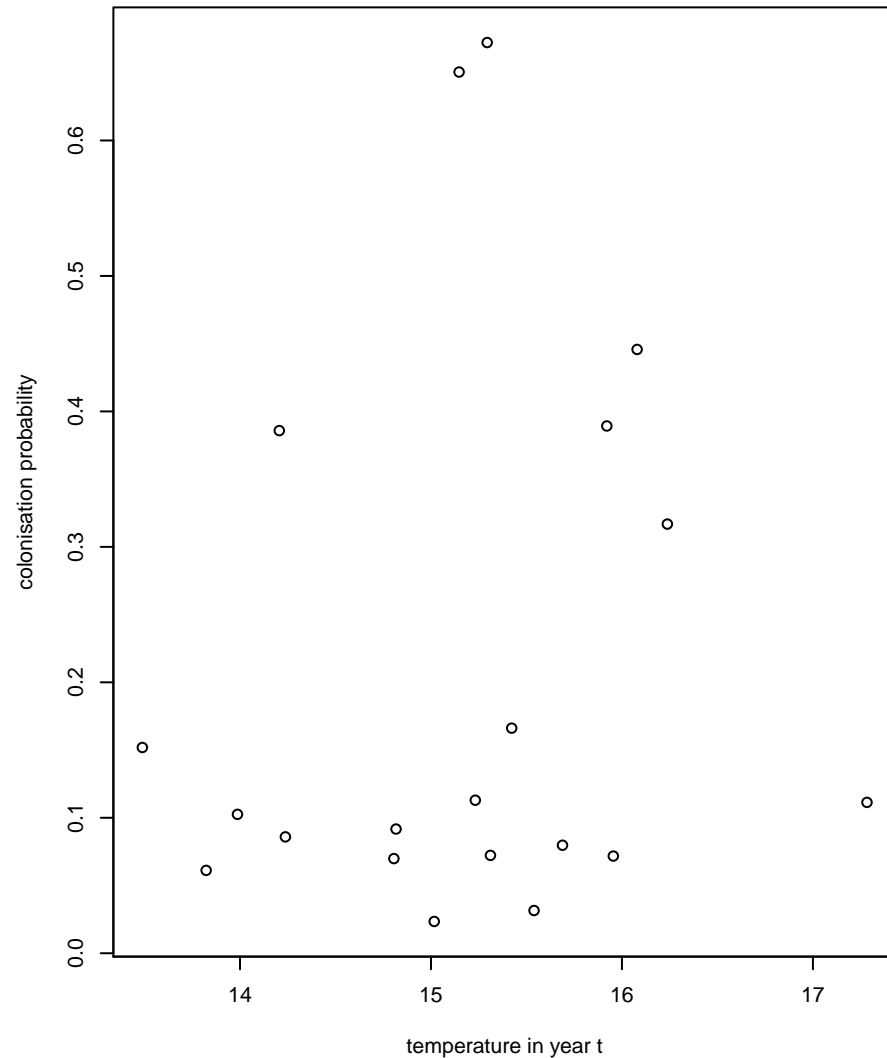

**Gomphus pulchellus**

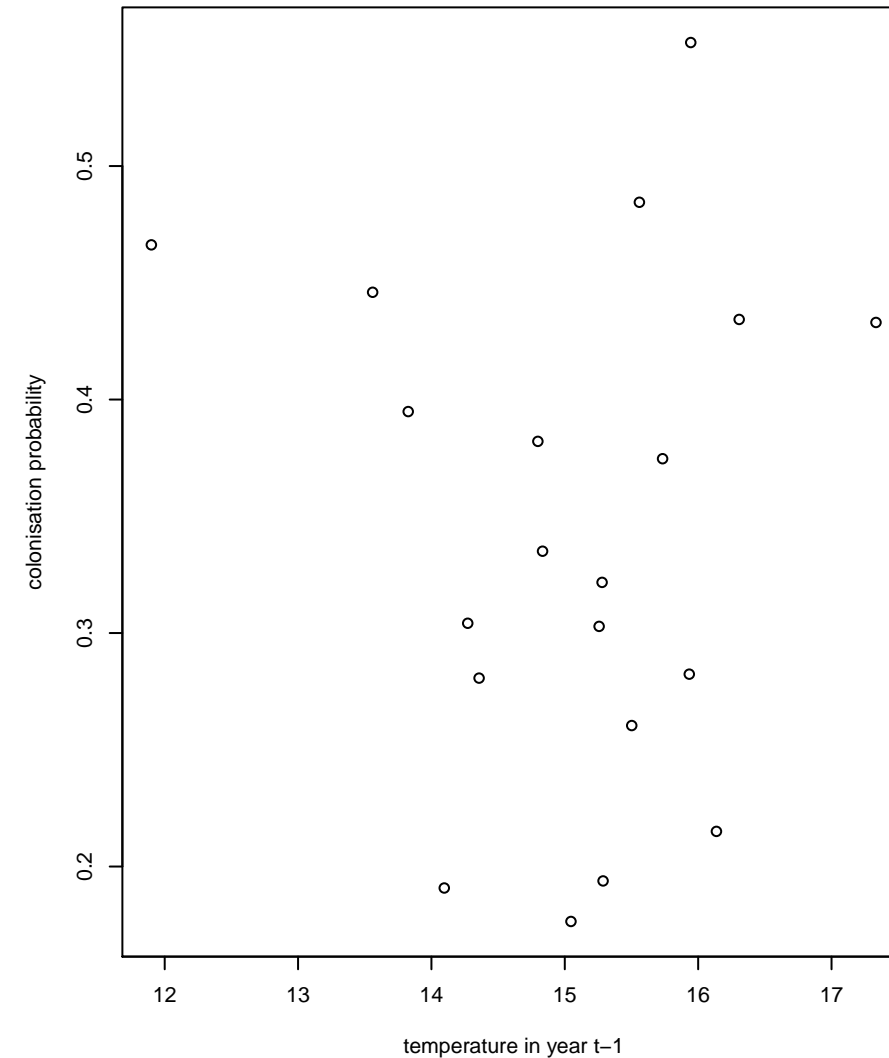

**Gomphus pulchellus**

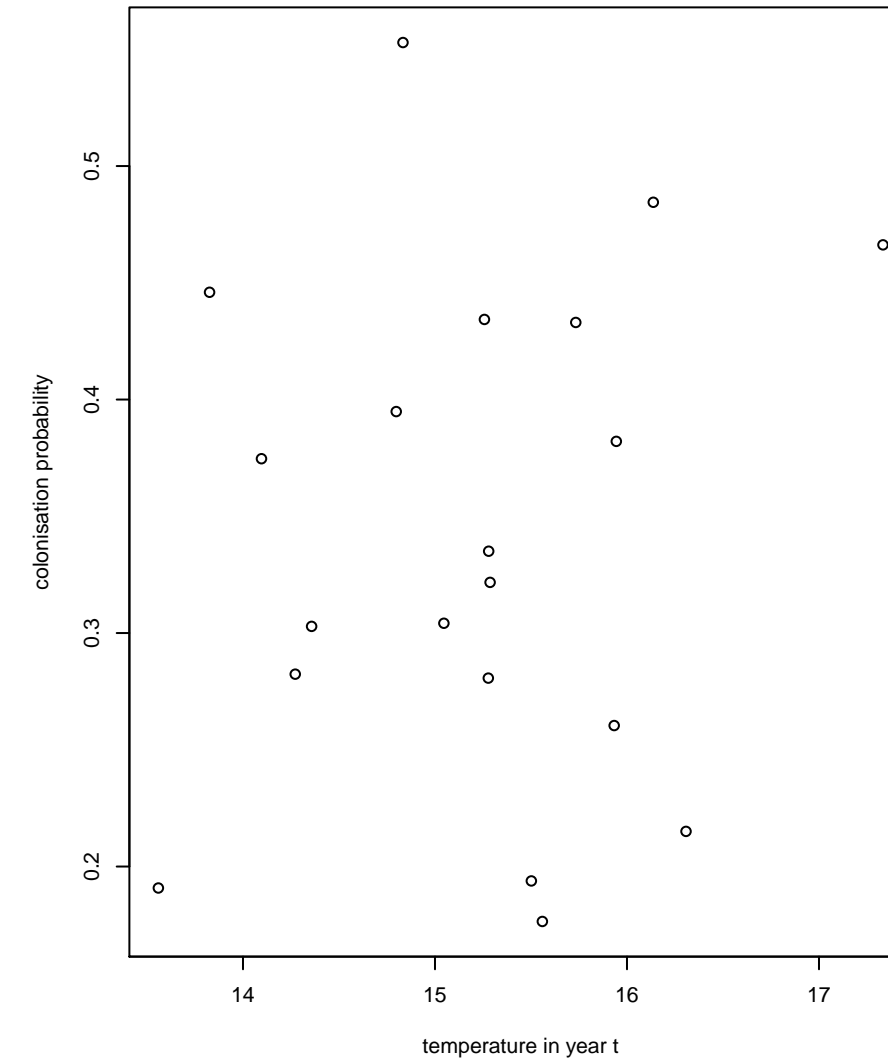

**Pyronia tithonus**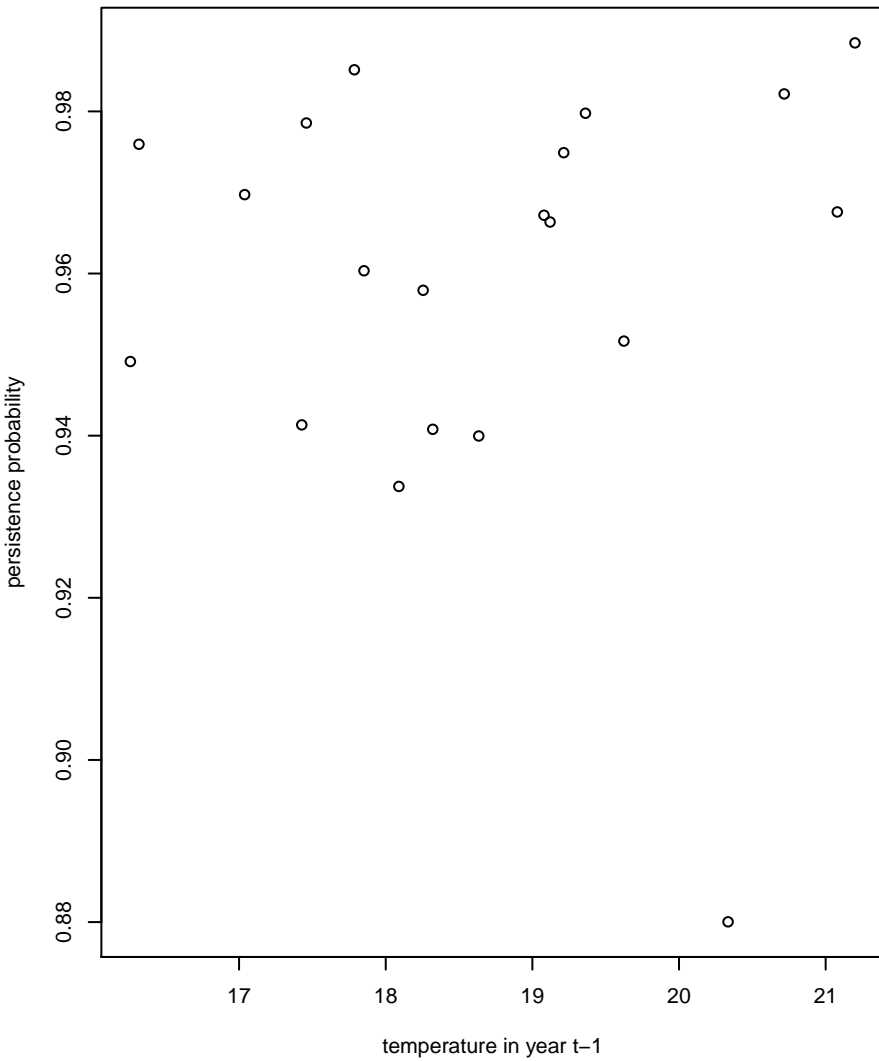**Pyronia tithonus**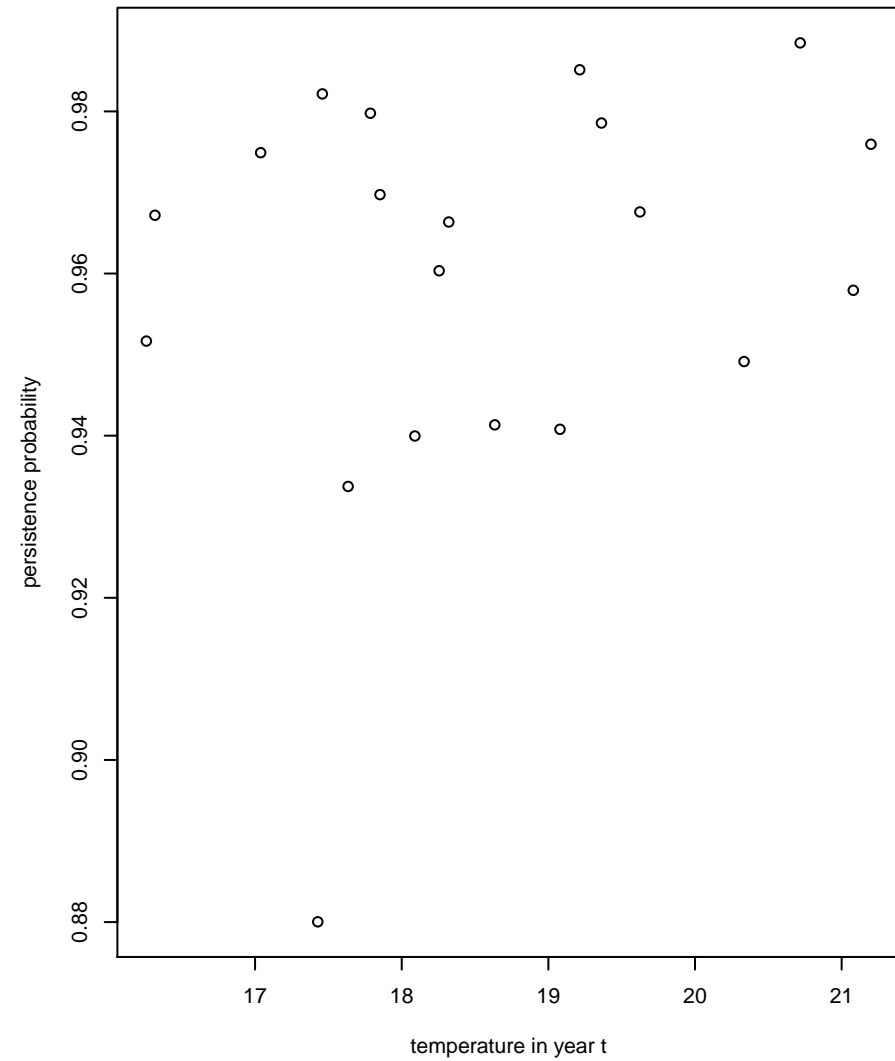**Maniola jurtina**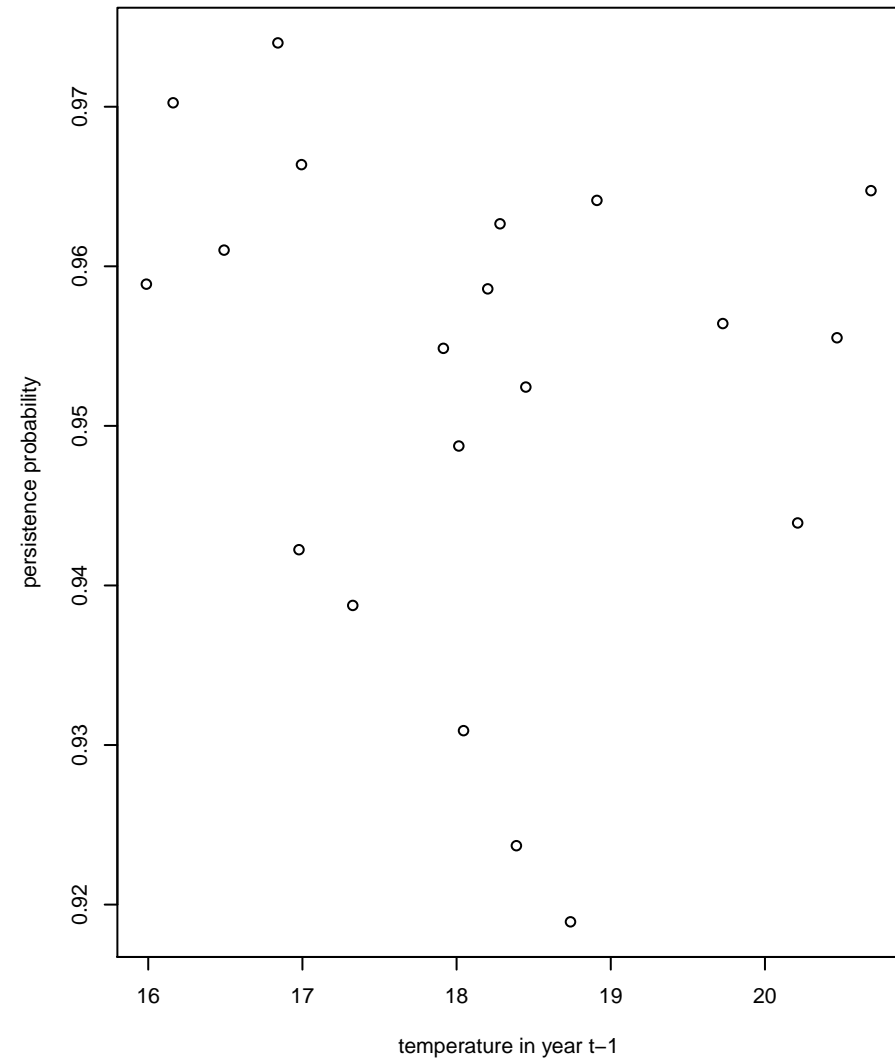**Maniola jurtina**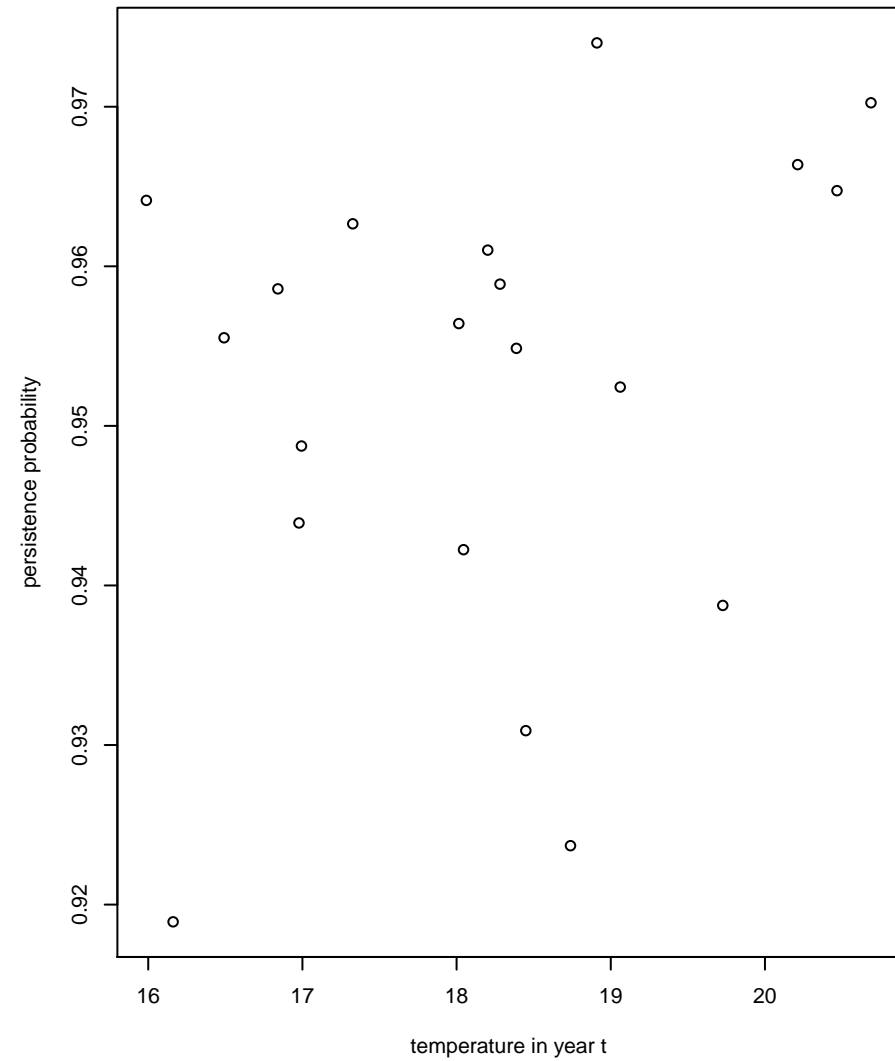**Hipparchia semele**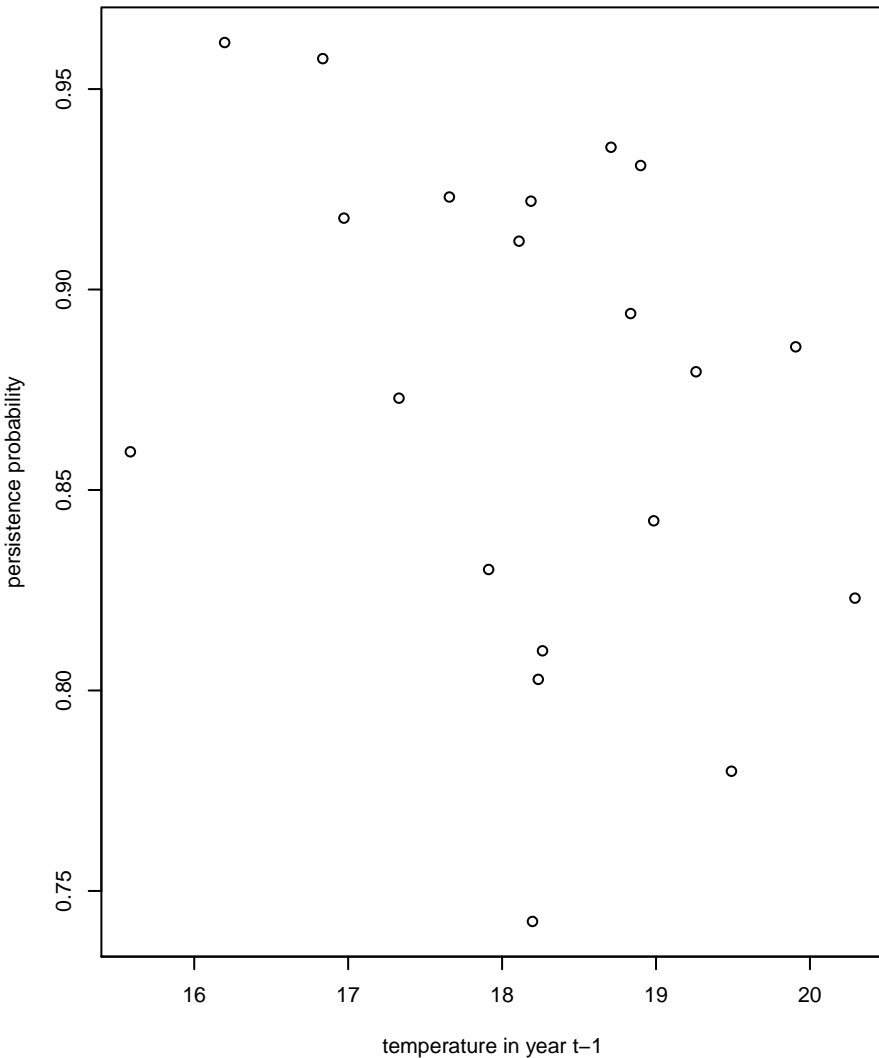**Hipparchia semele**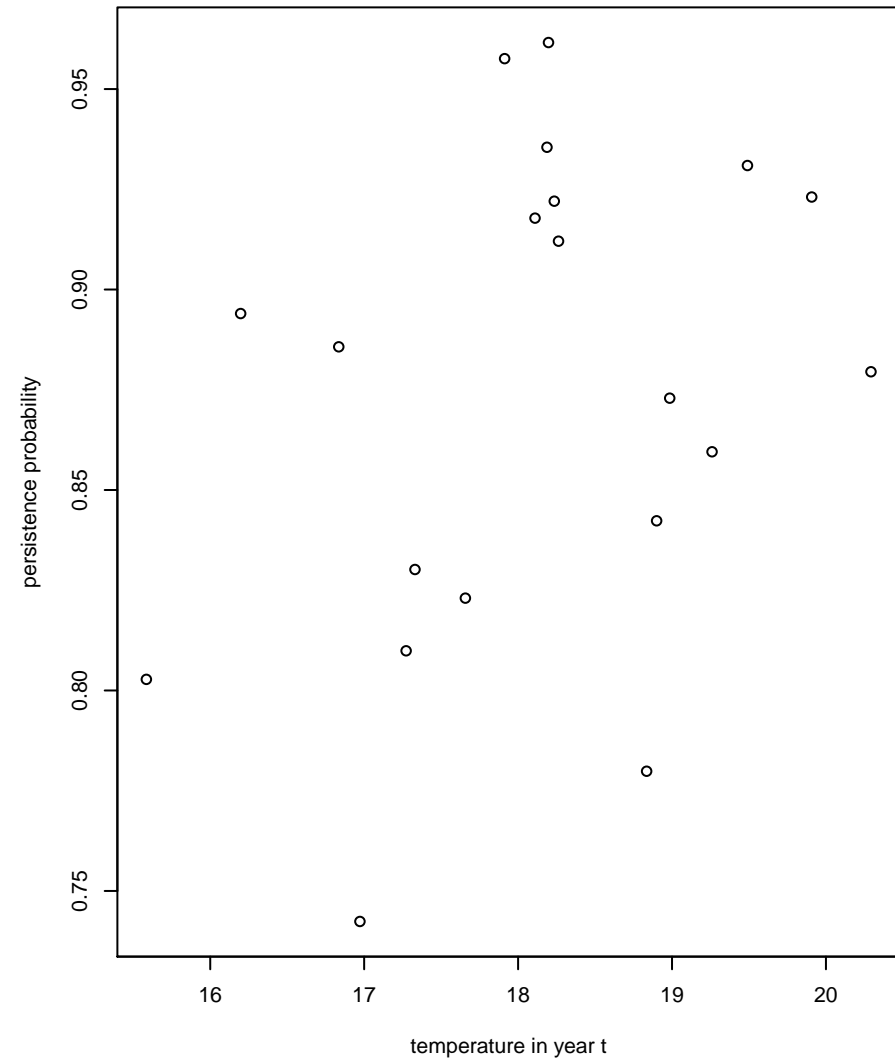**Papilio machaon**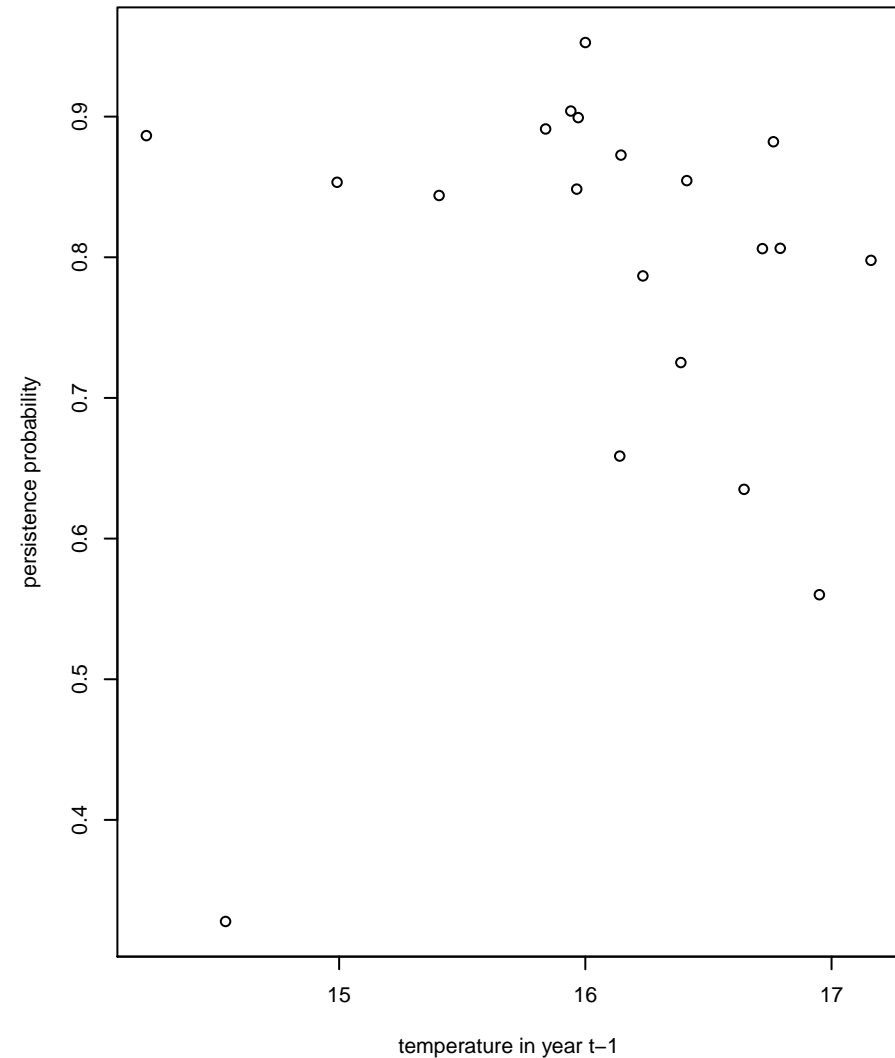**Papilio machaon**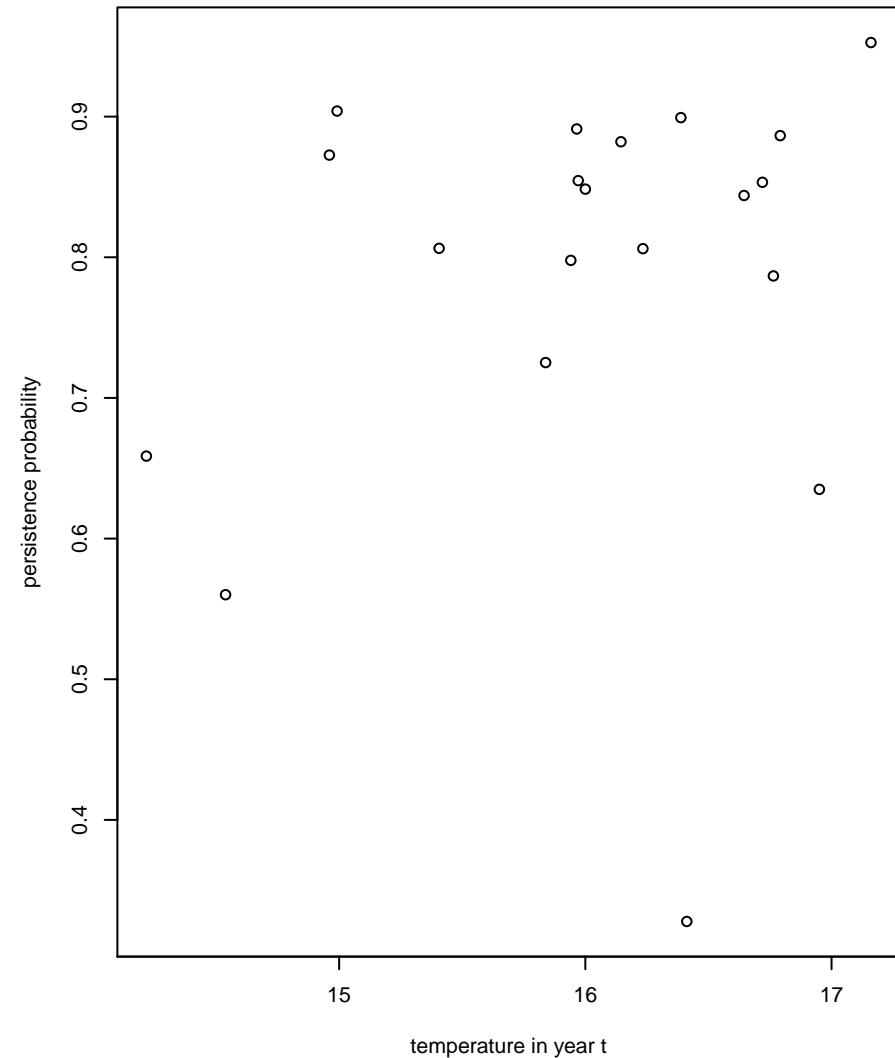

**Carterocephalus palaemon**

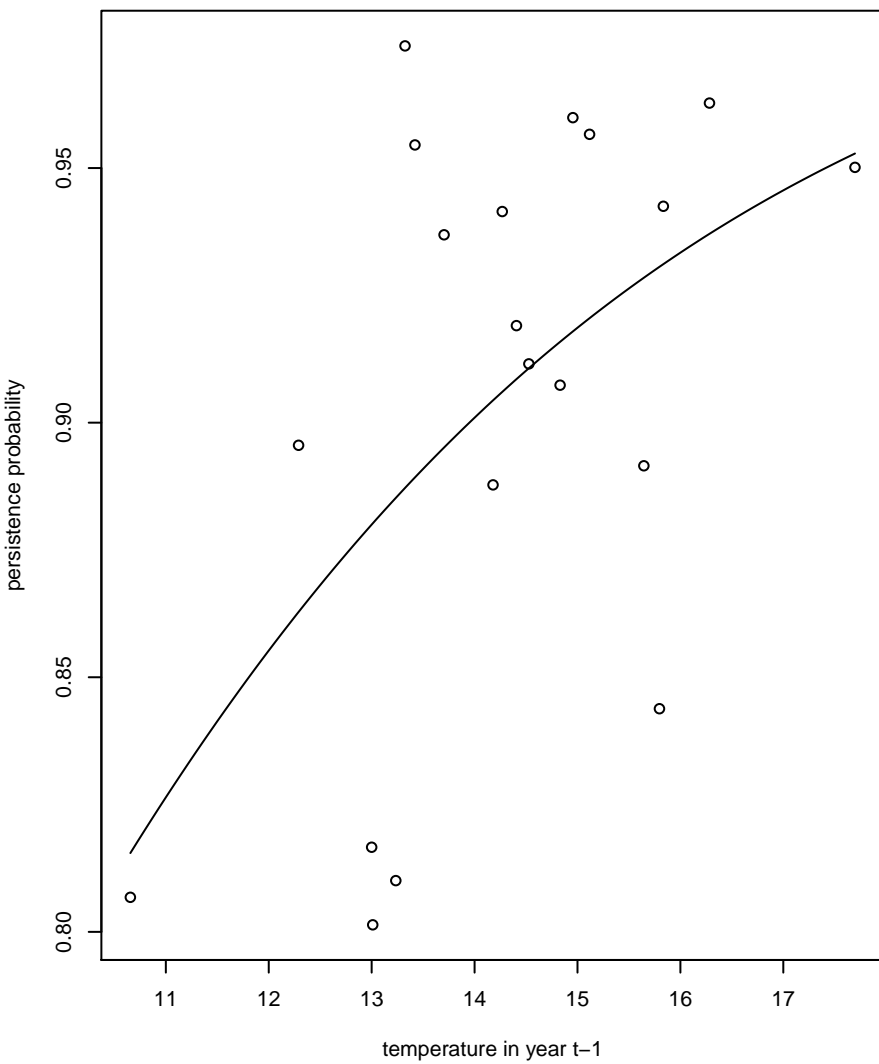

**Carterocephalus palaemon**

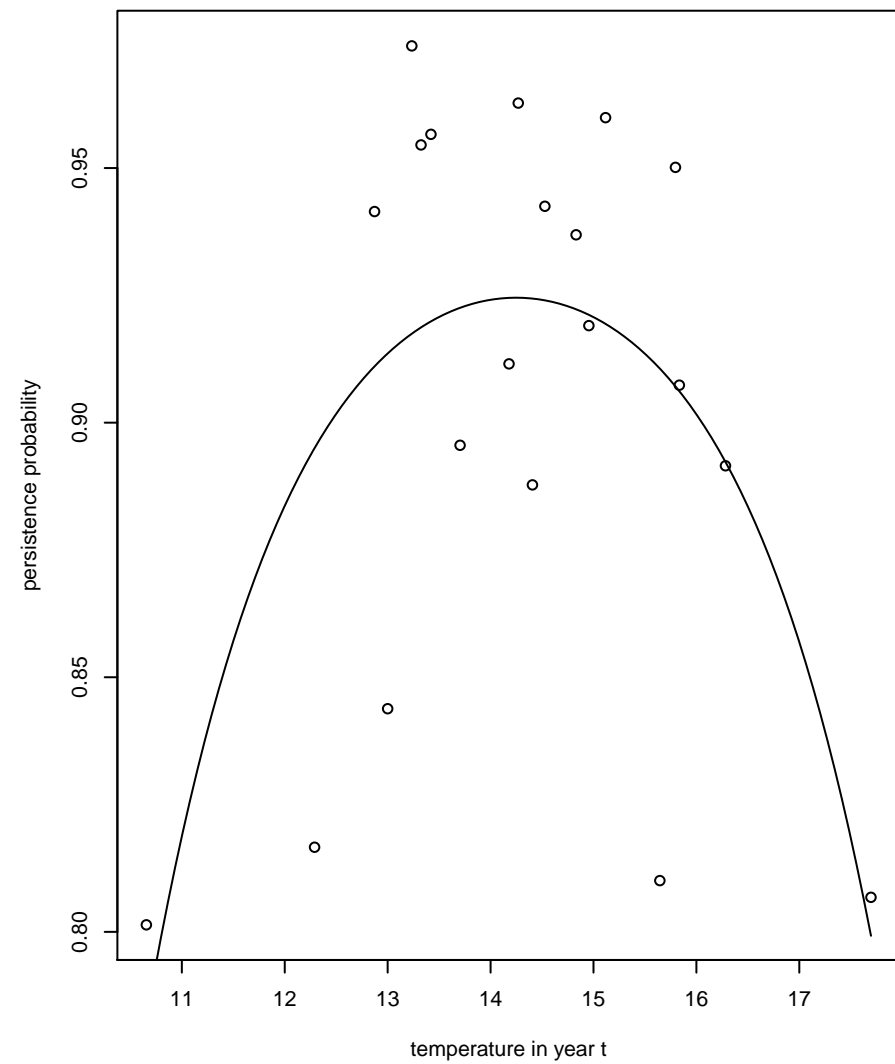

**Gonepteryx rhamni**

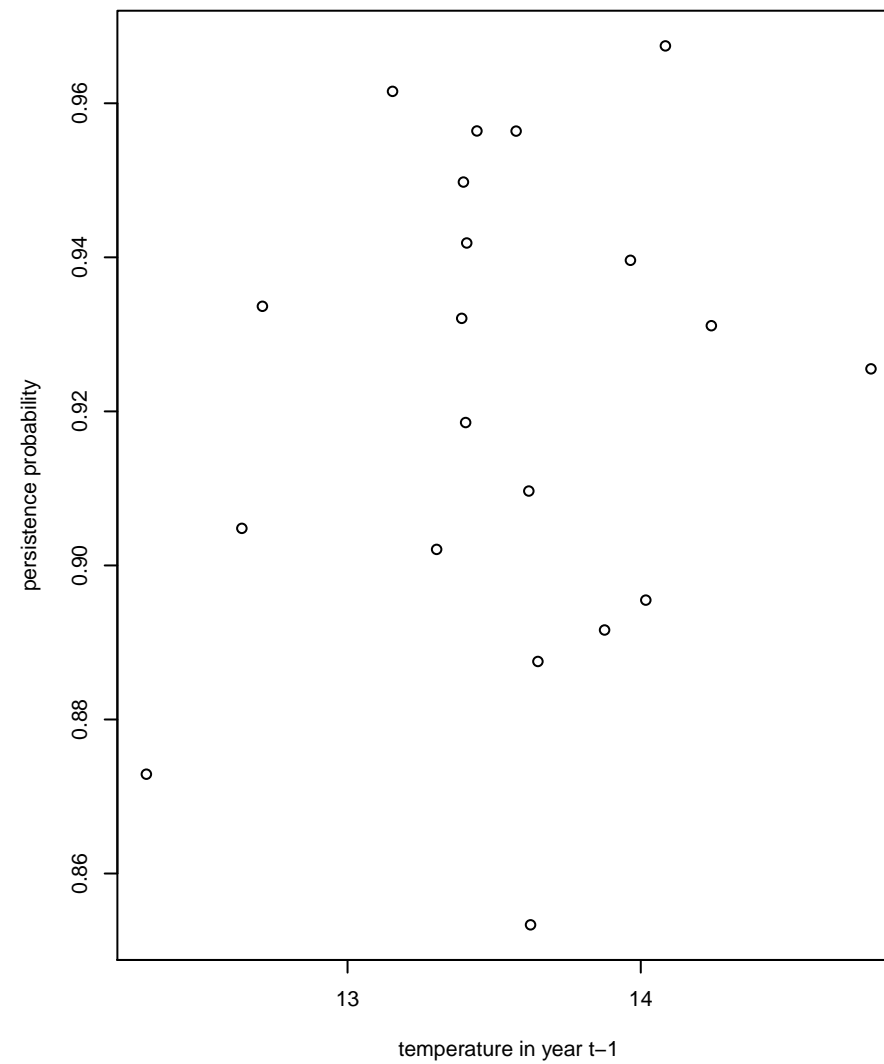

**Gonepteryx rhamni**

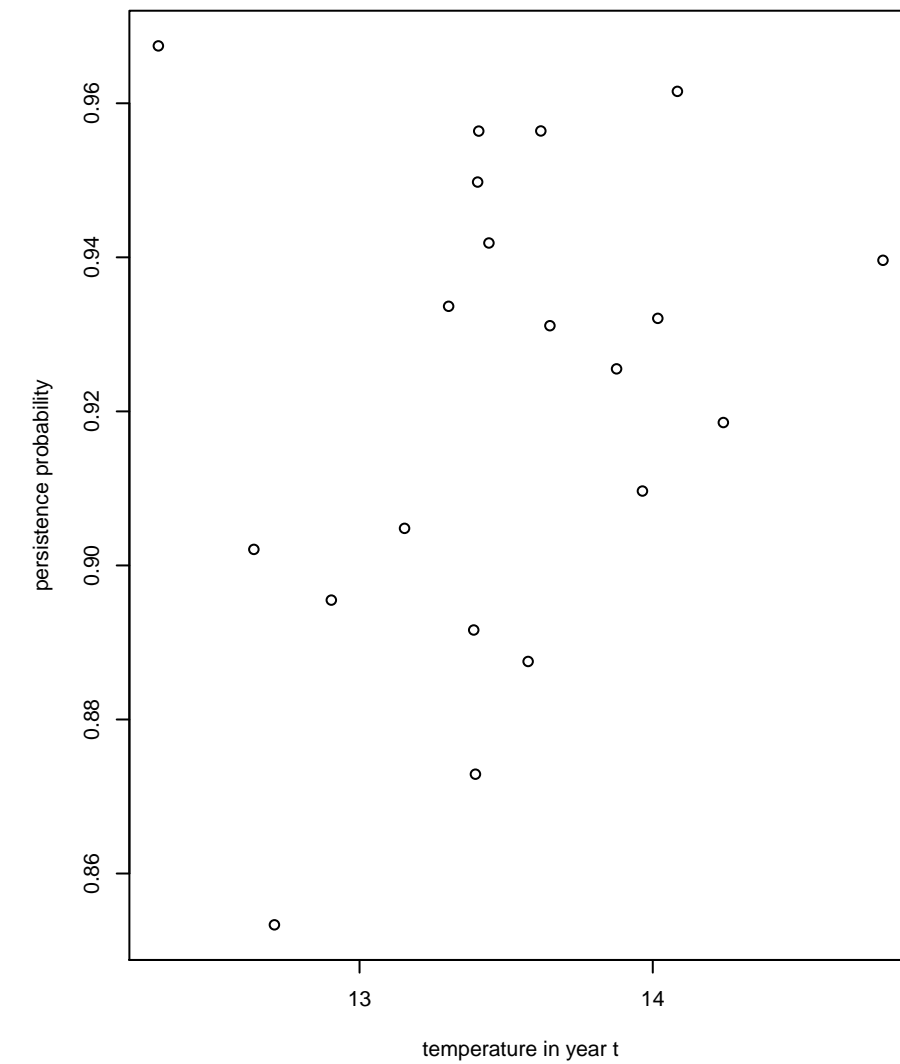

**Pieris brassicae**

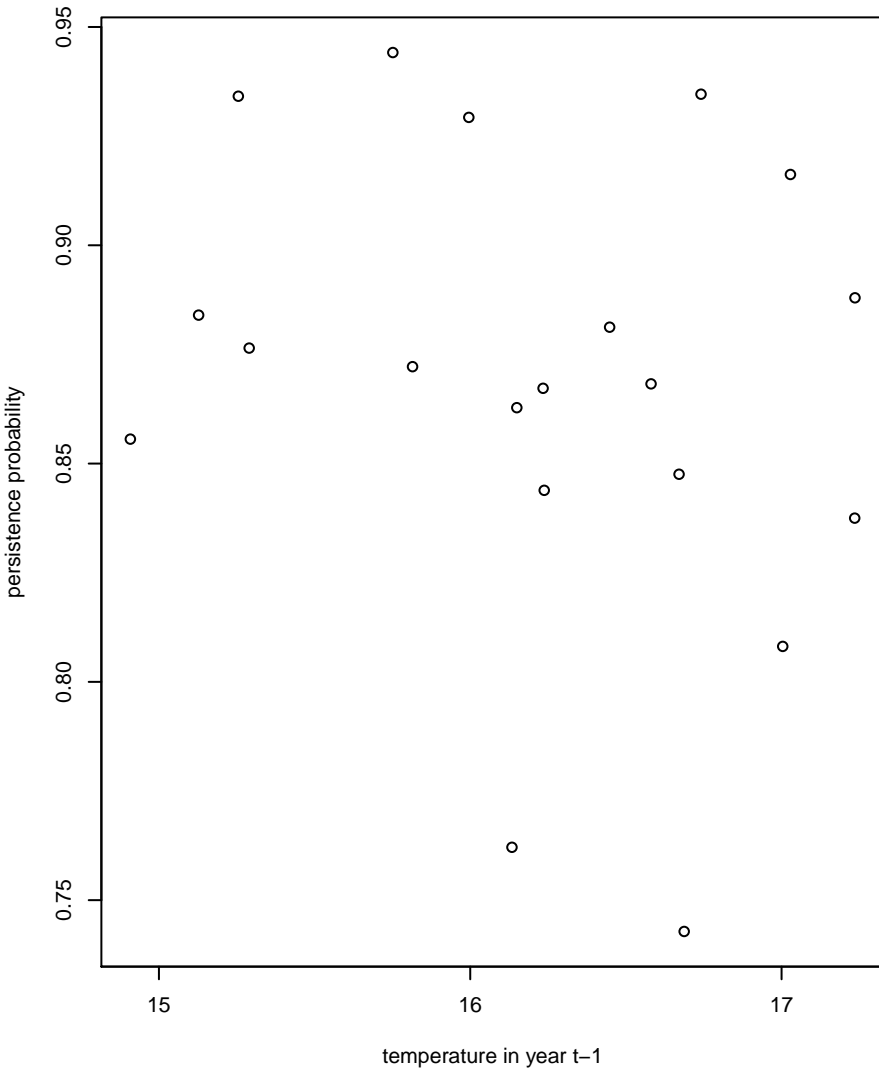

**Pieris brassicae**

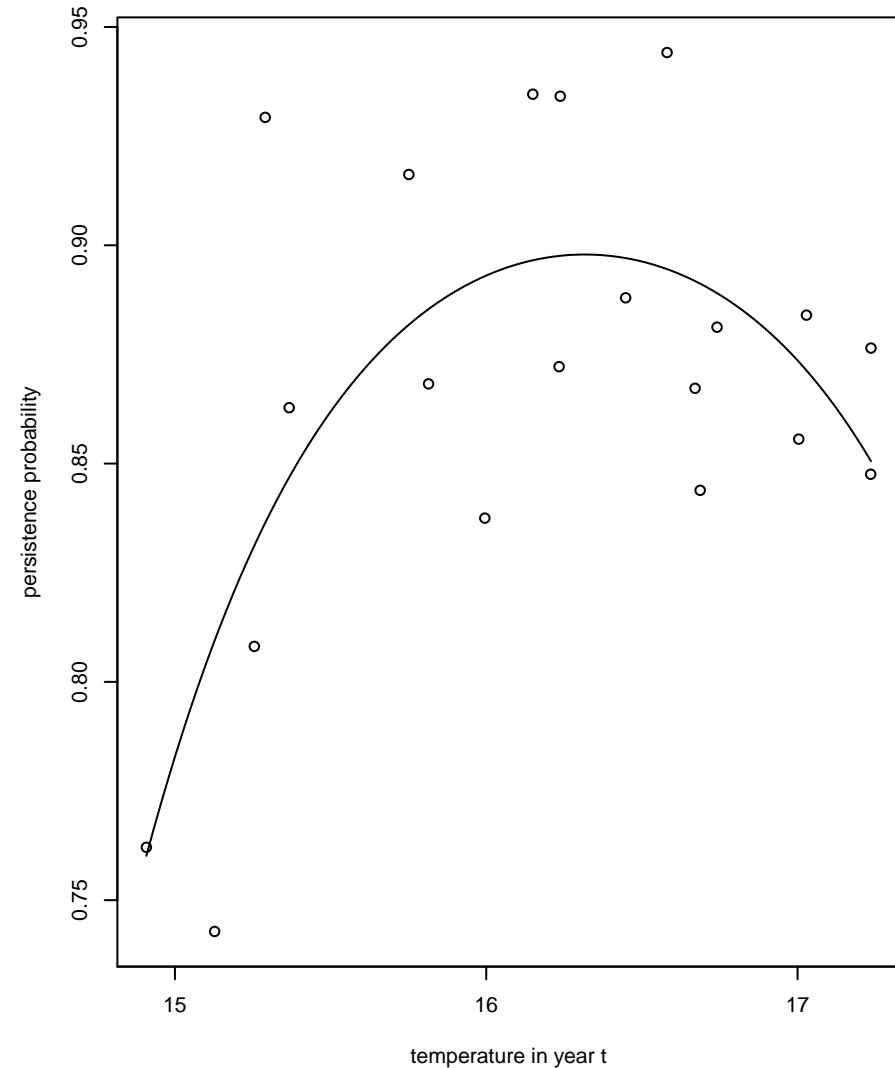

**Thymelicus sylvestris**

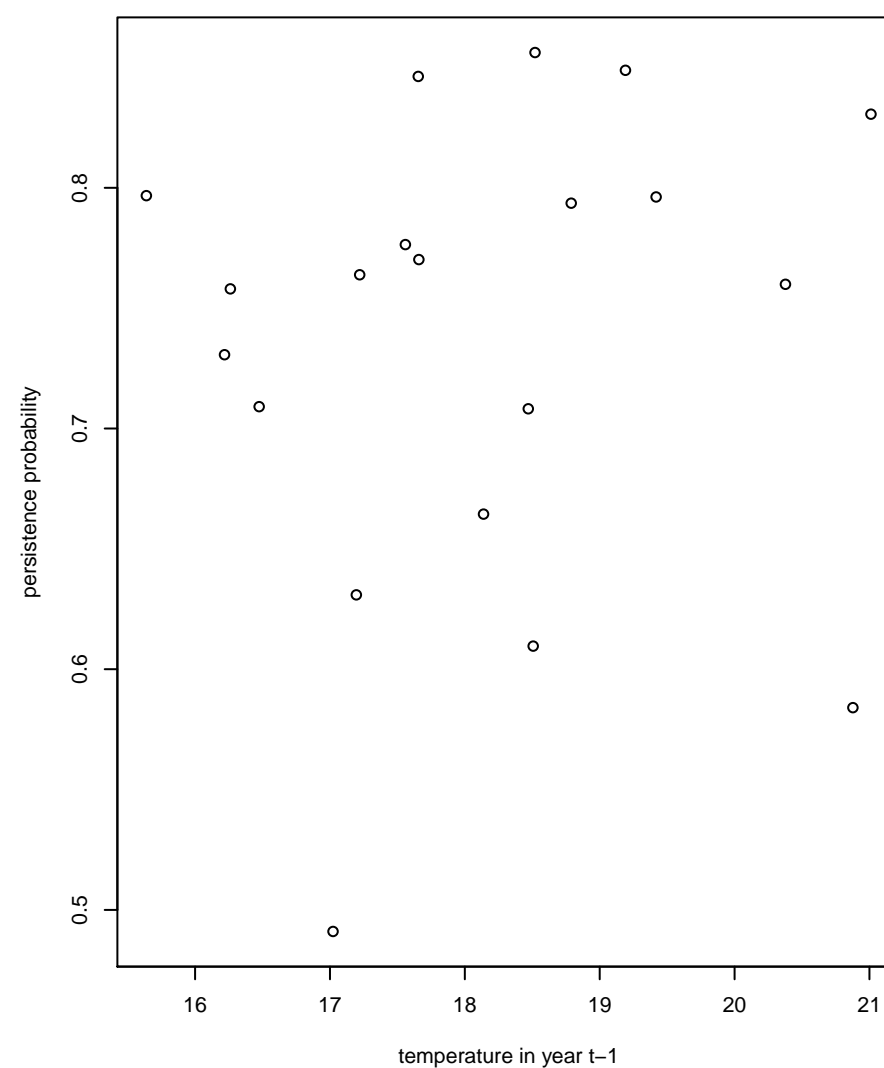

**Thymelicus sylvestris**

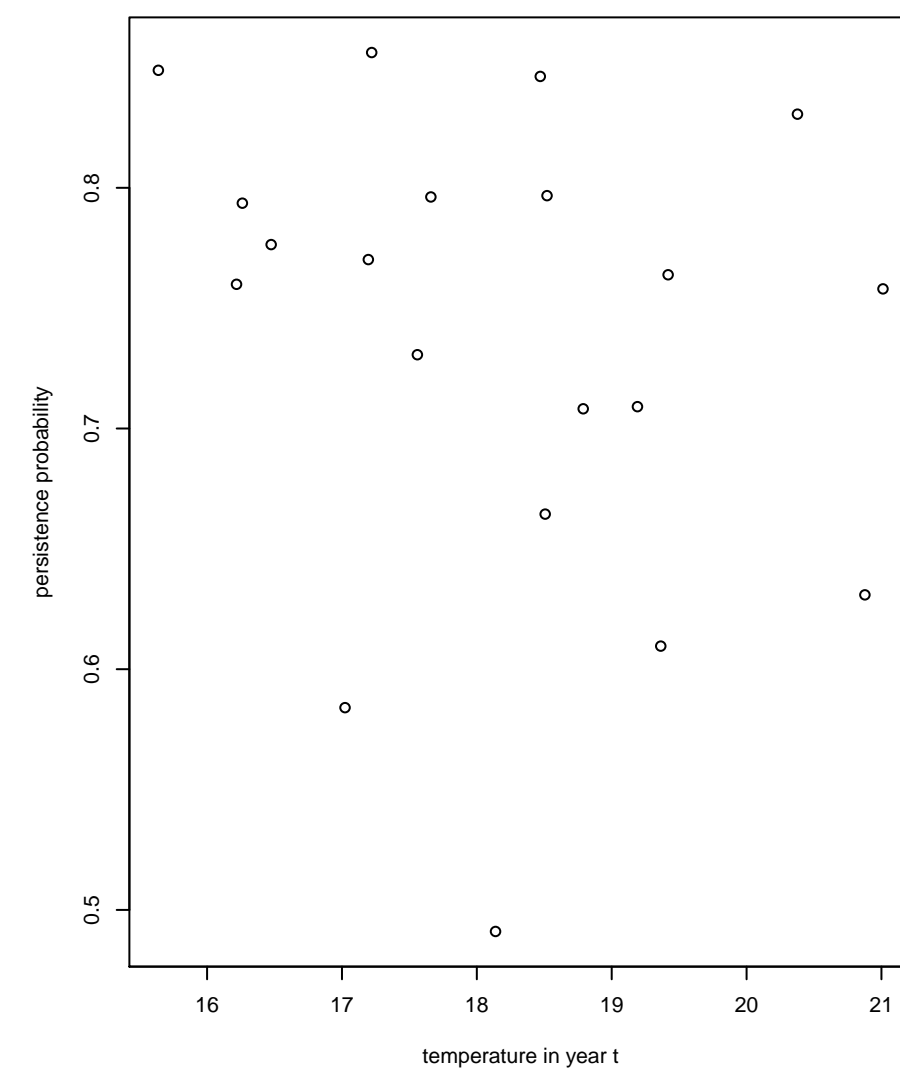

**Pieris rapae**

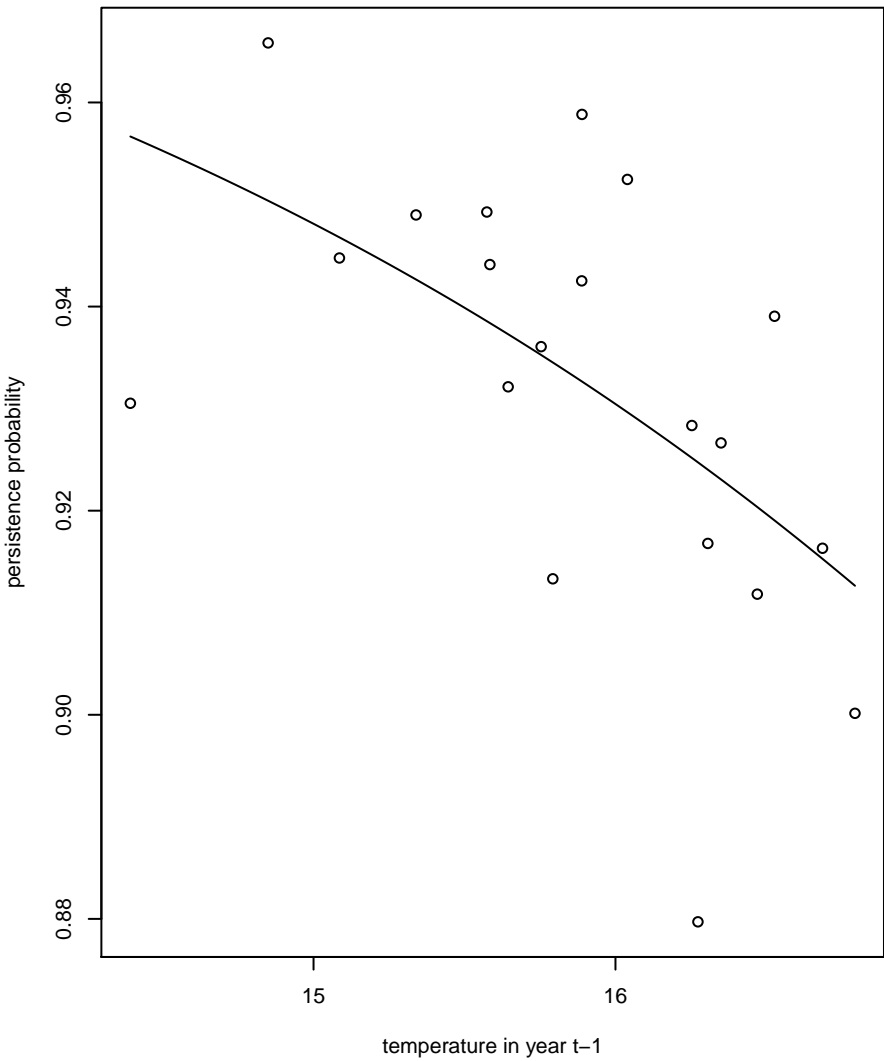

**Pieris rapae**

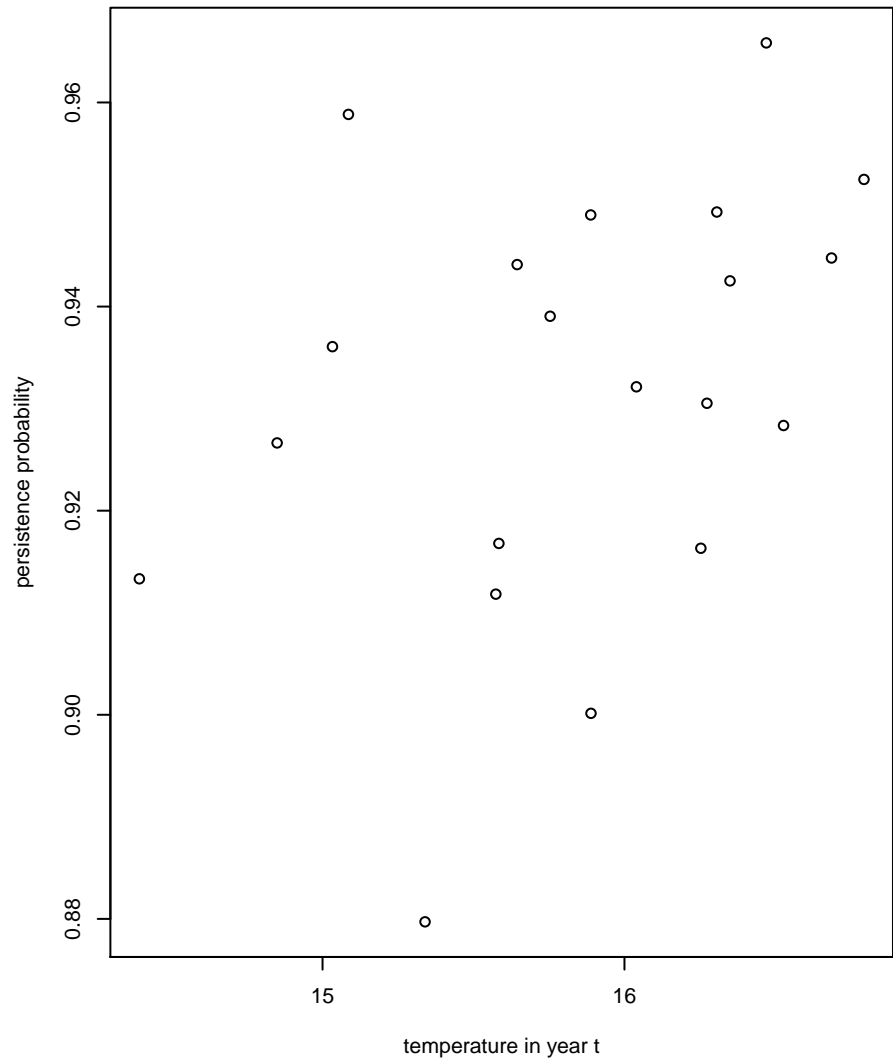

**Pieris napi**

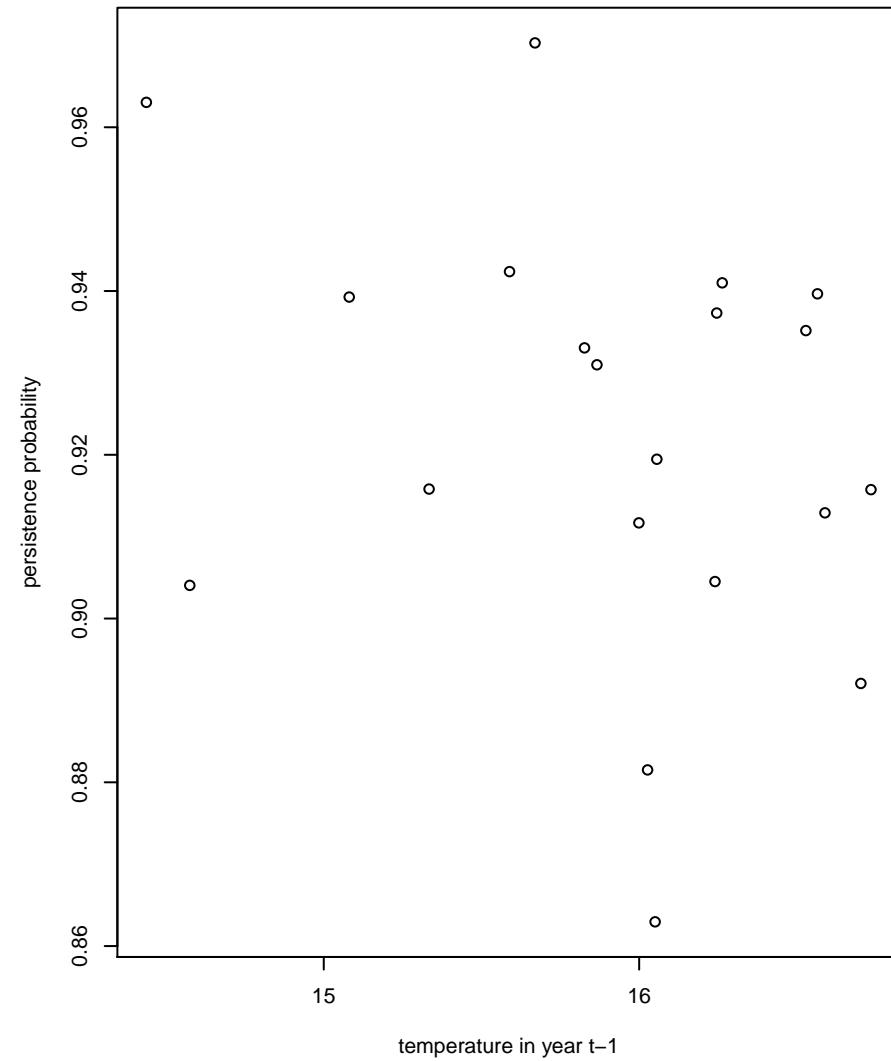

**Pieris napi**

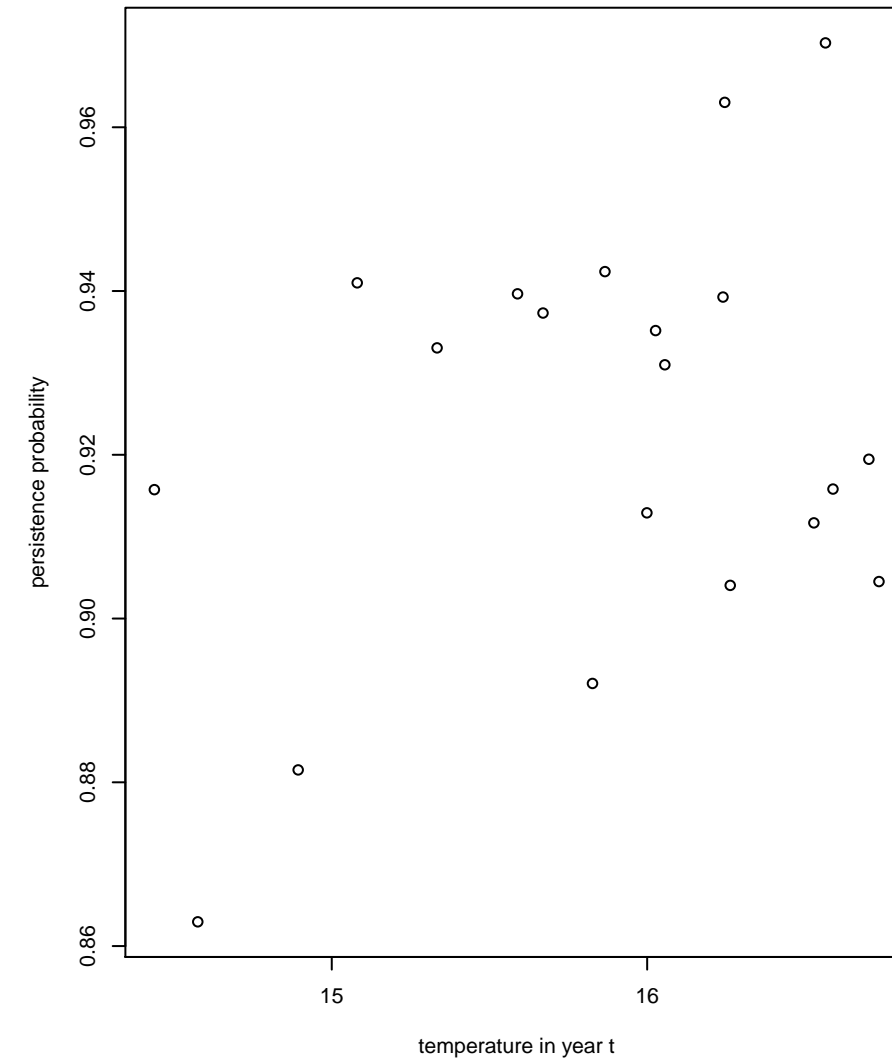

**Anthocharis cardamines**

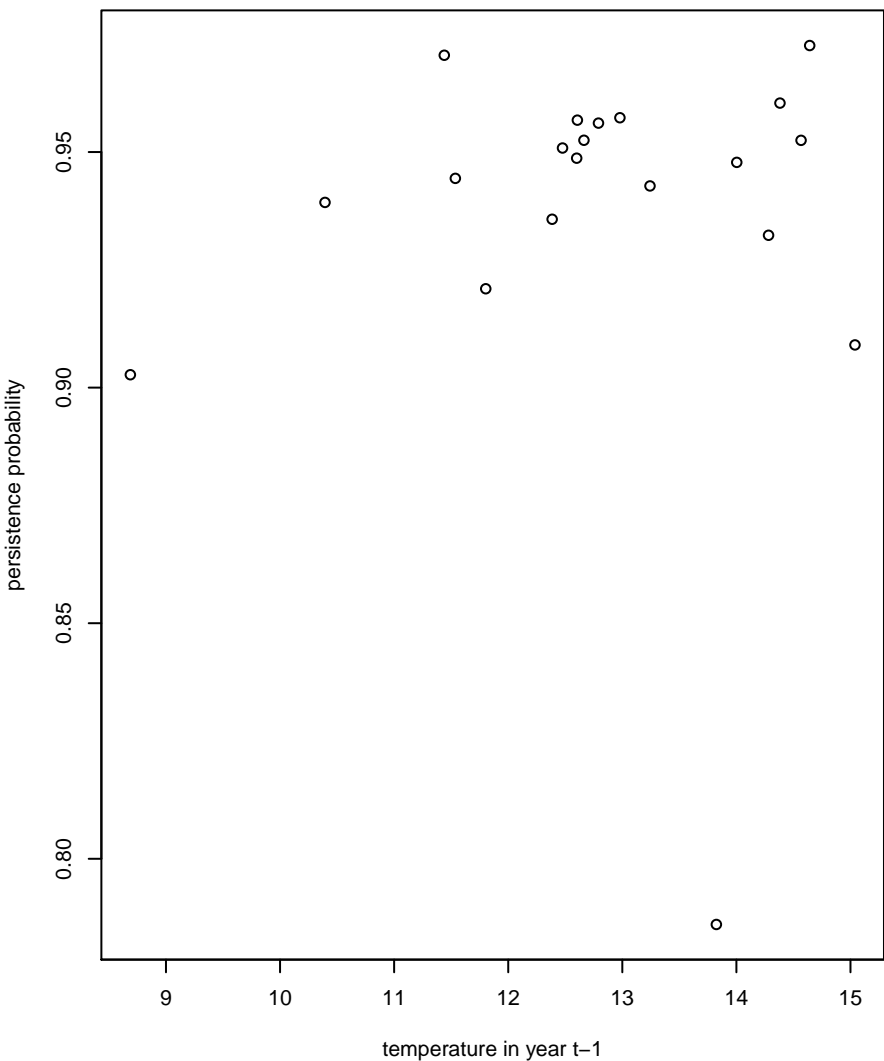

**Anthocharis cardamines**

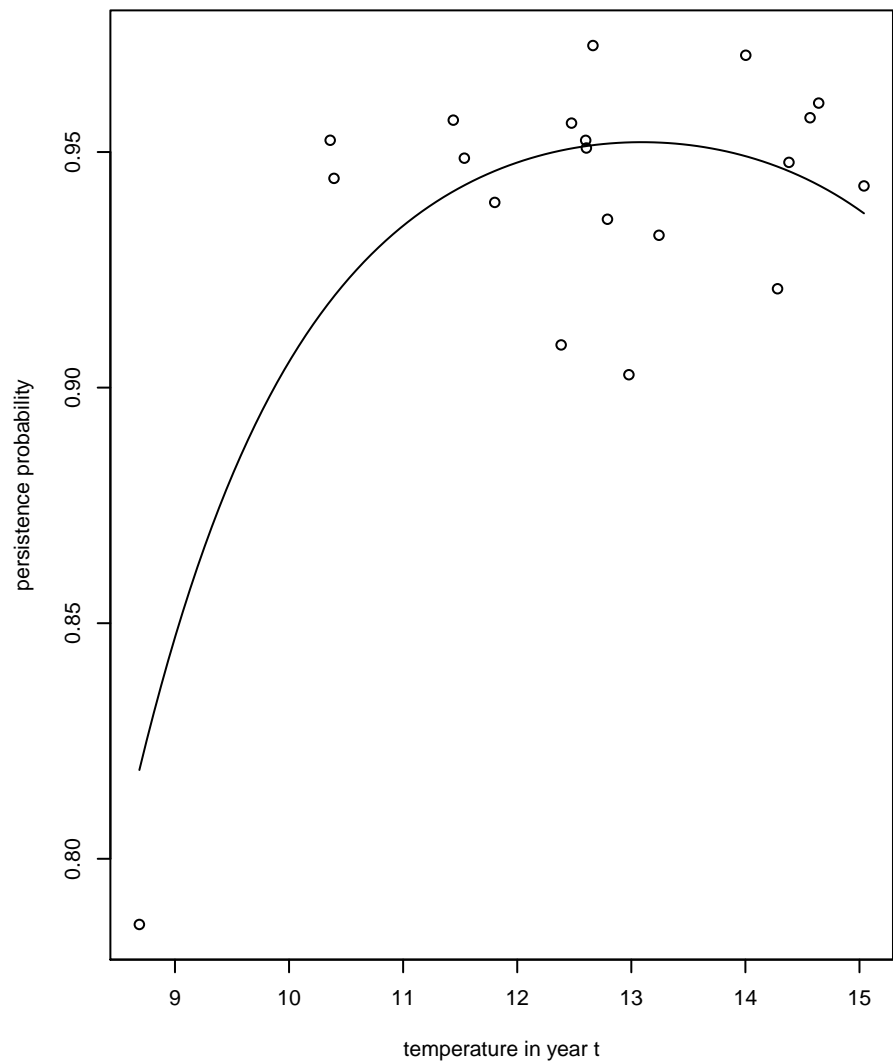

**Callophrys rubi**

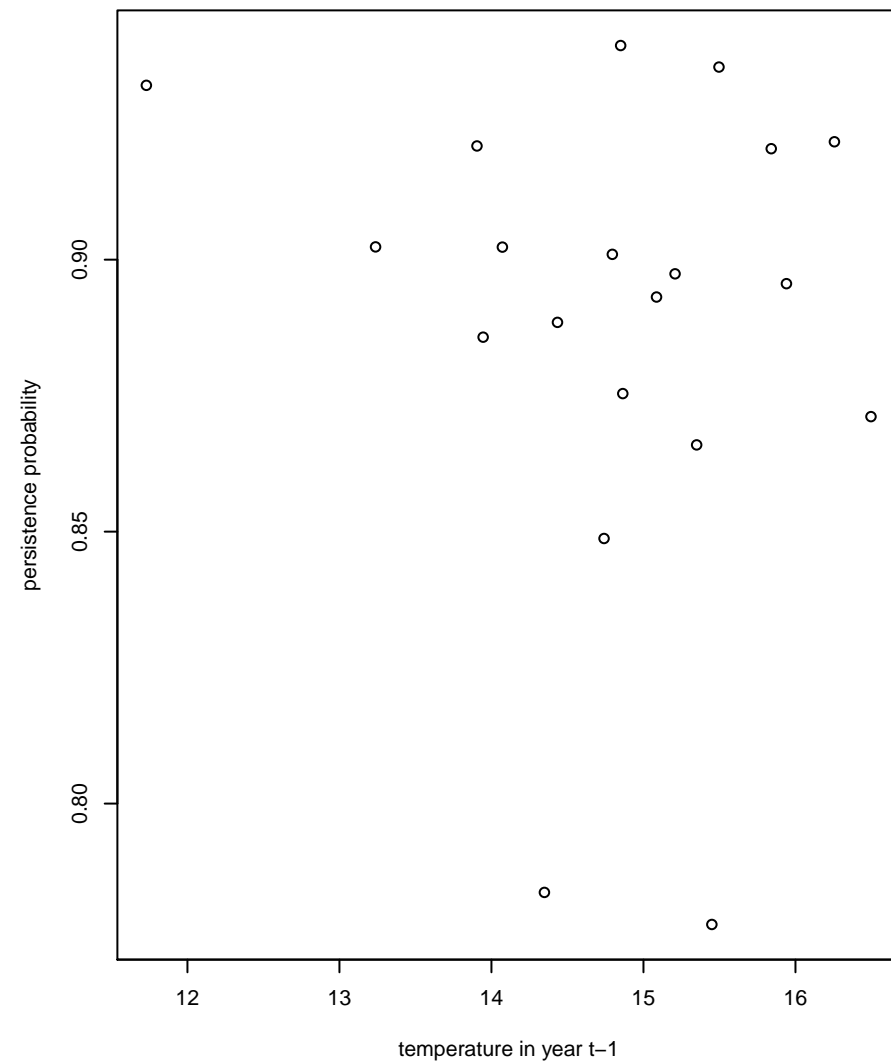

**Callophrys rubi**

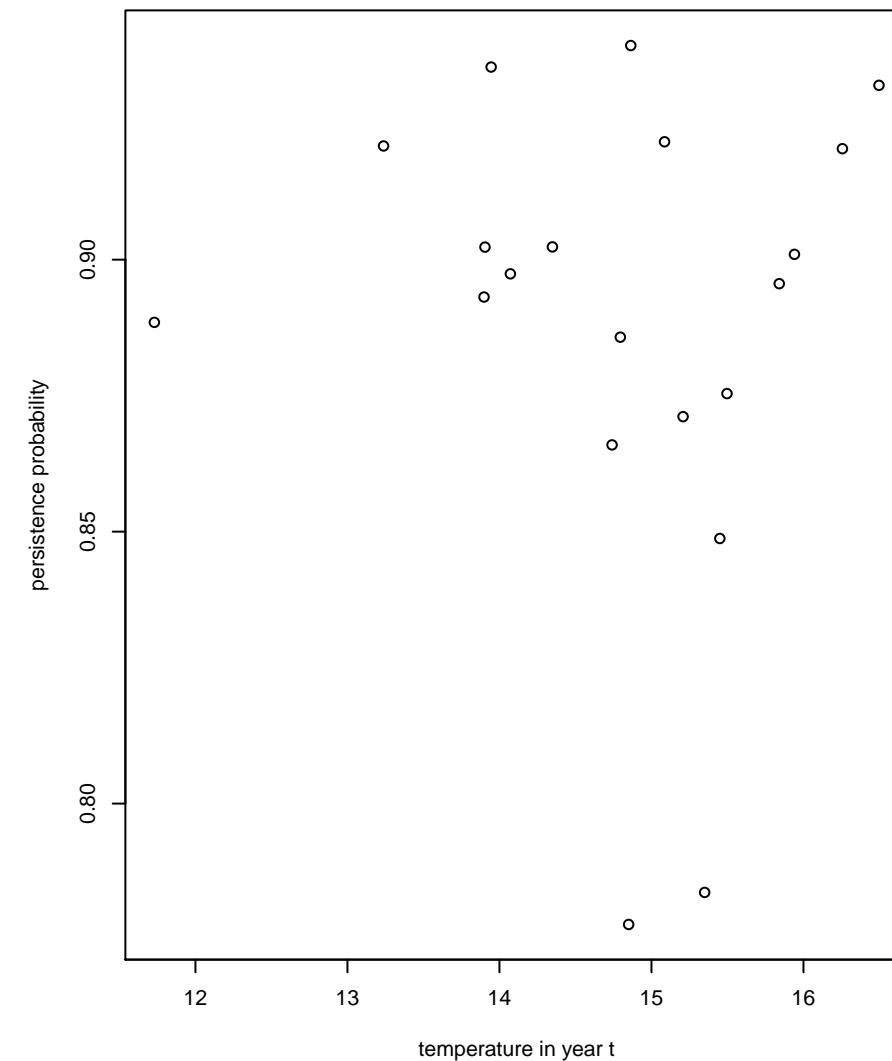

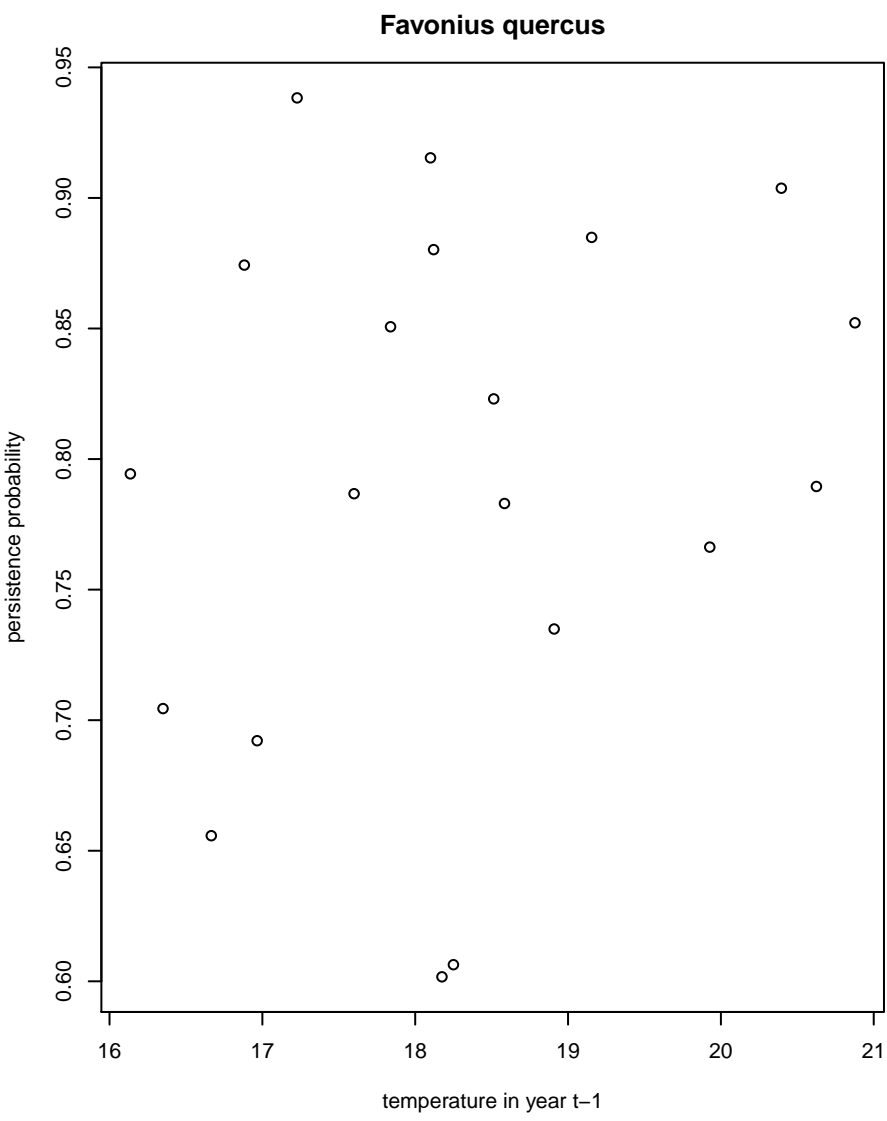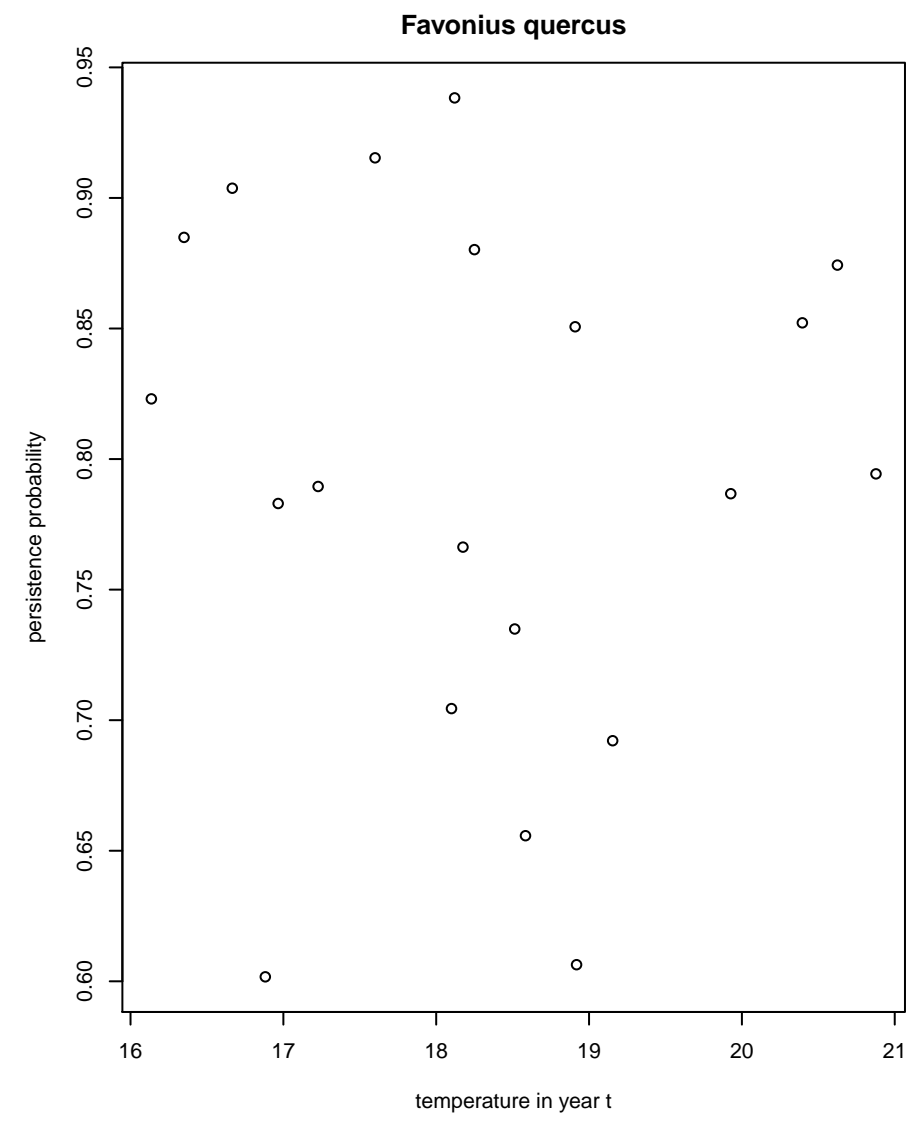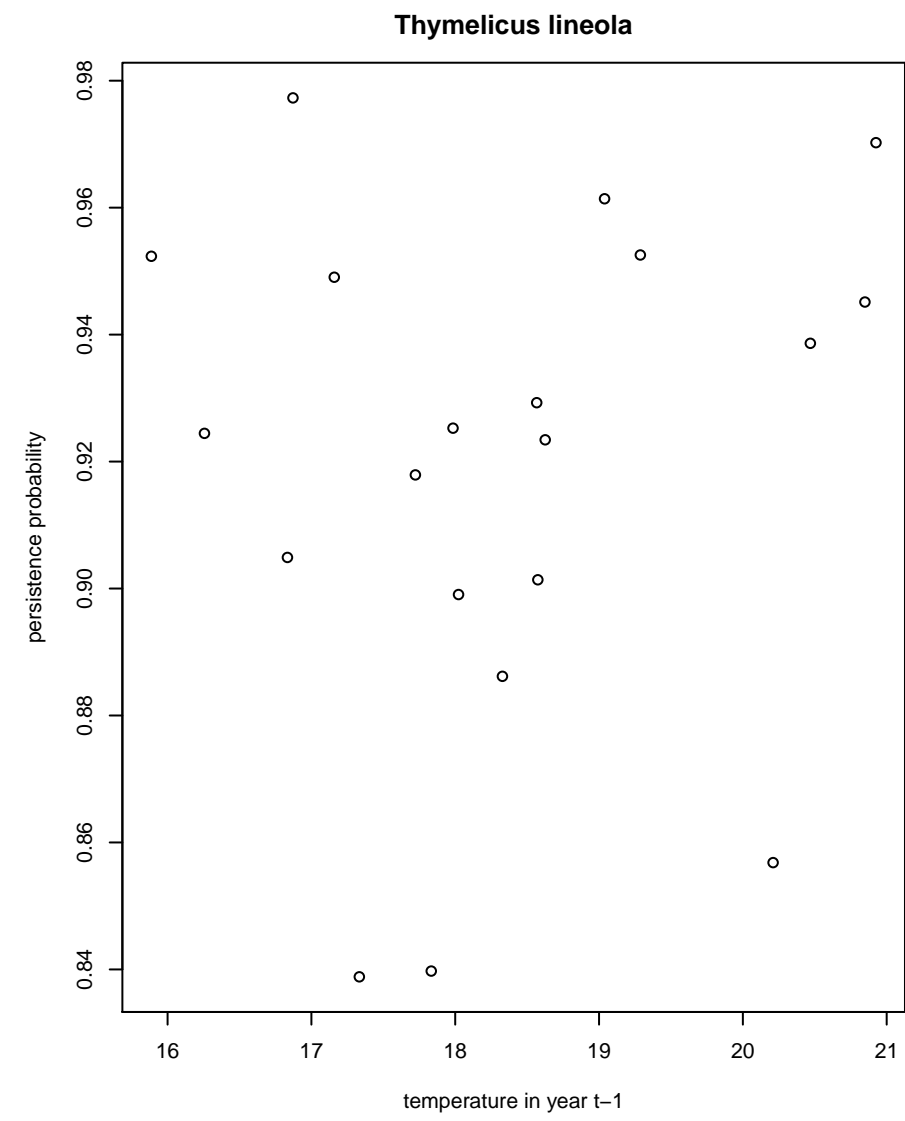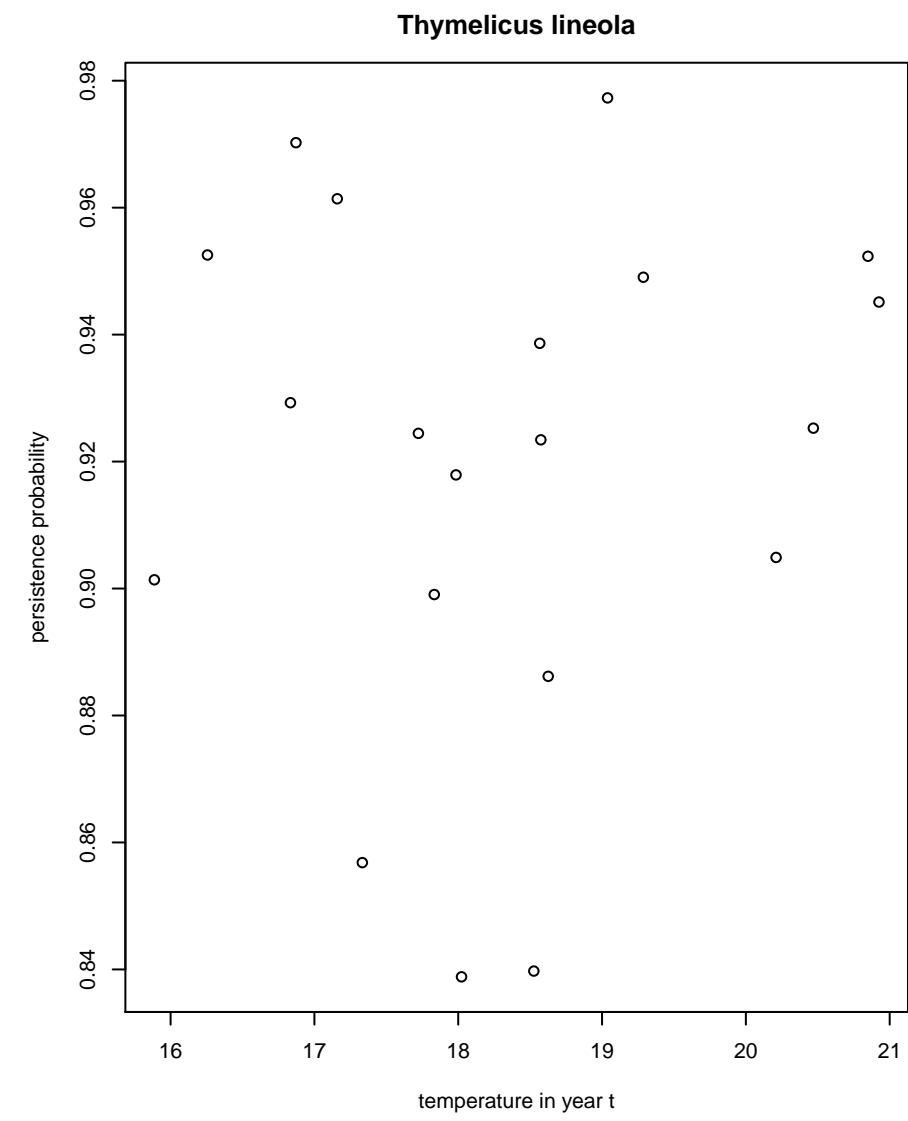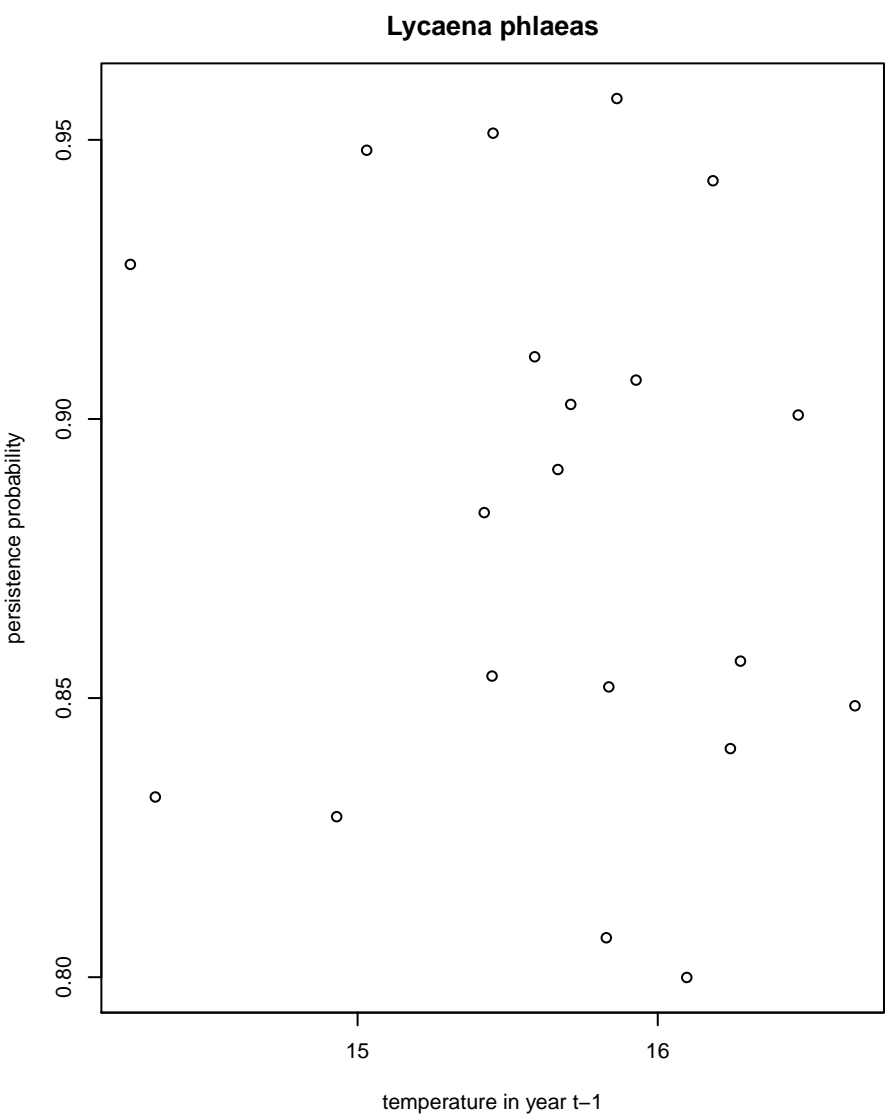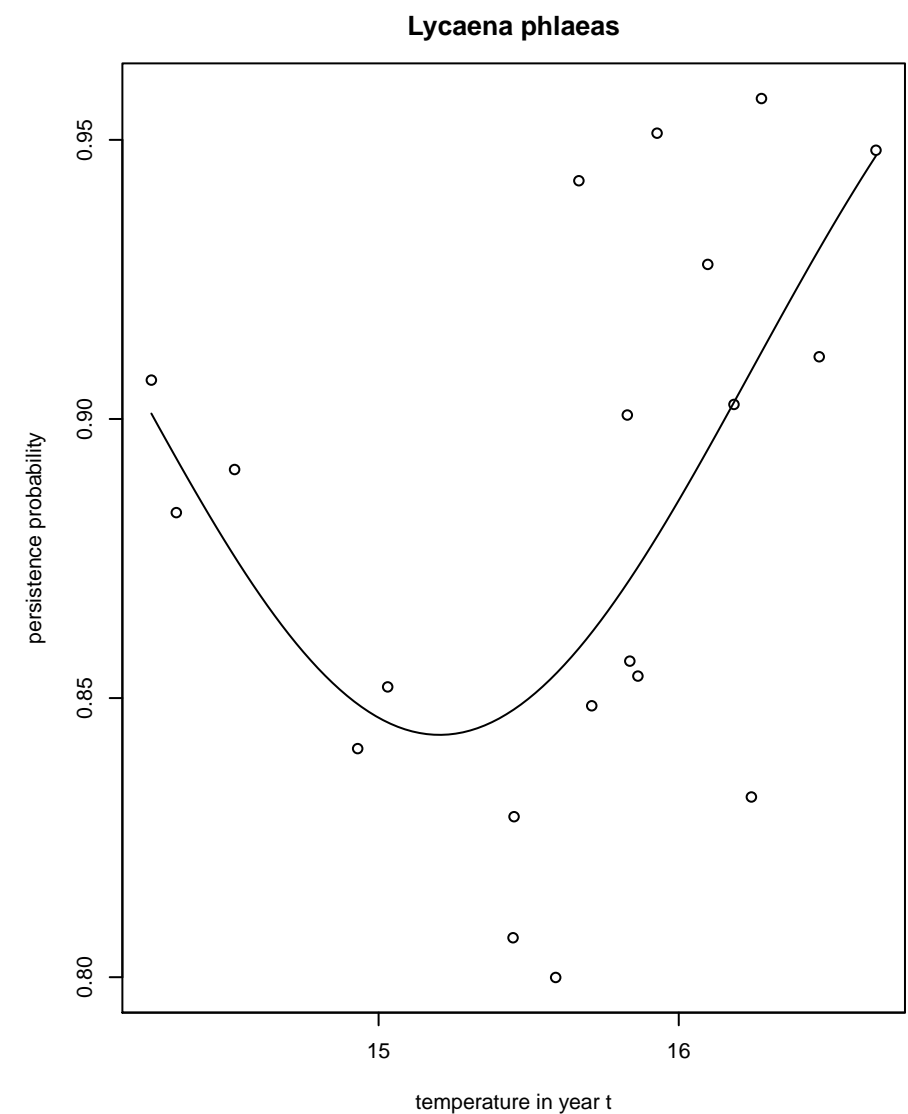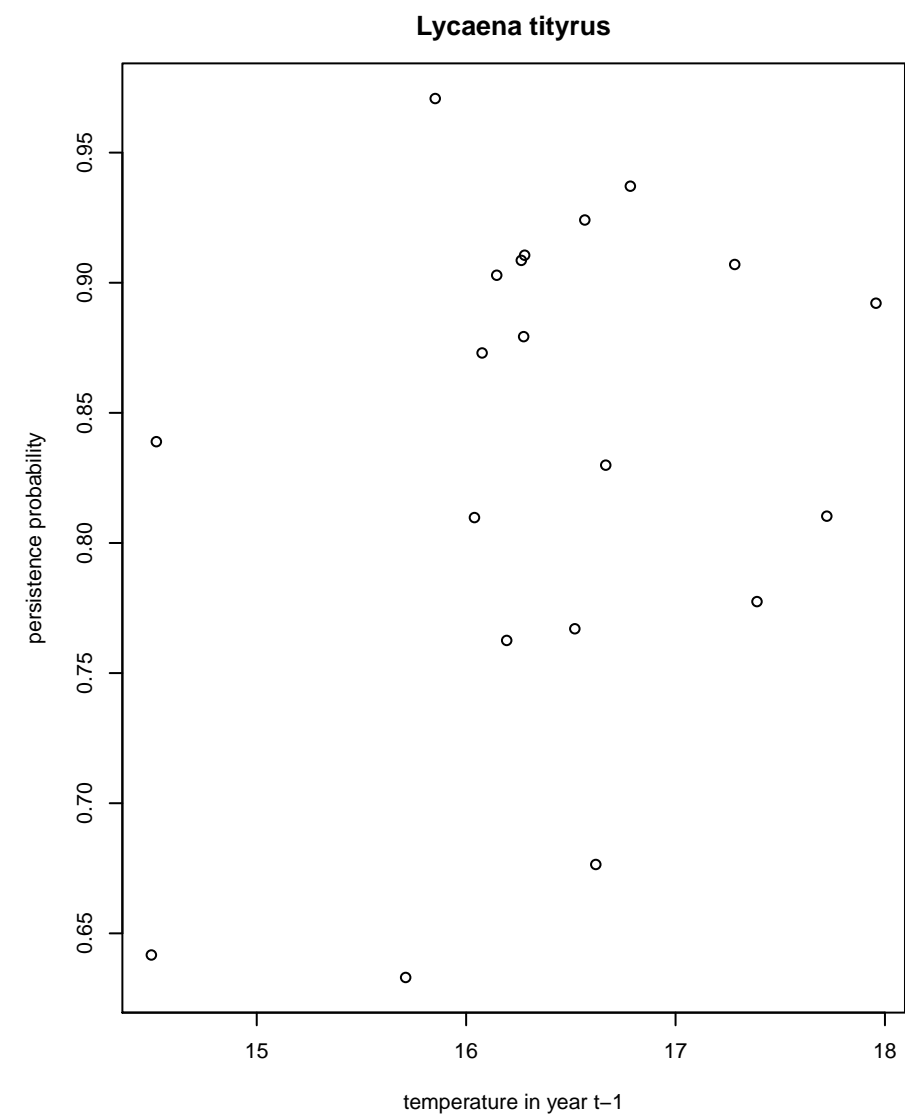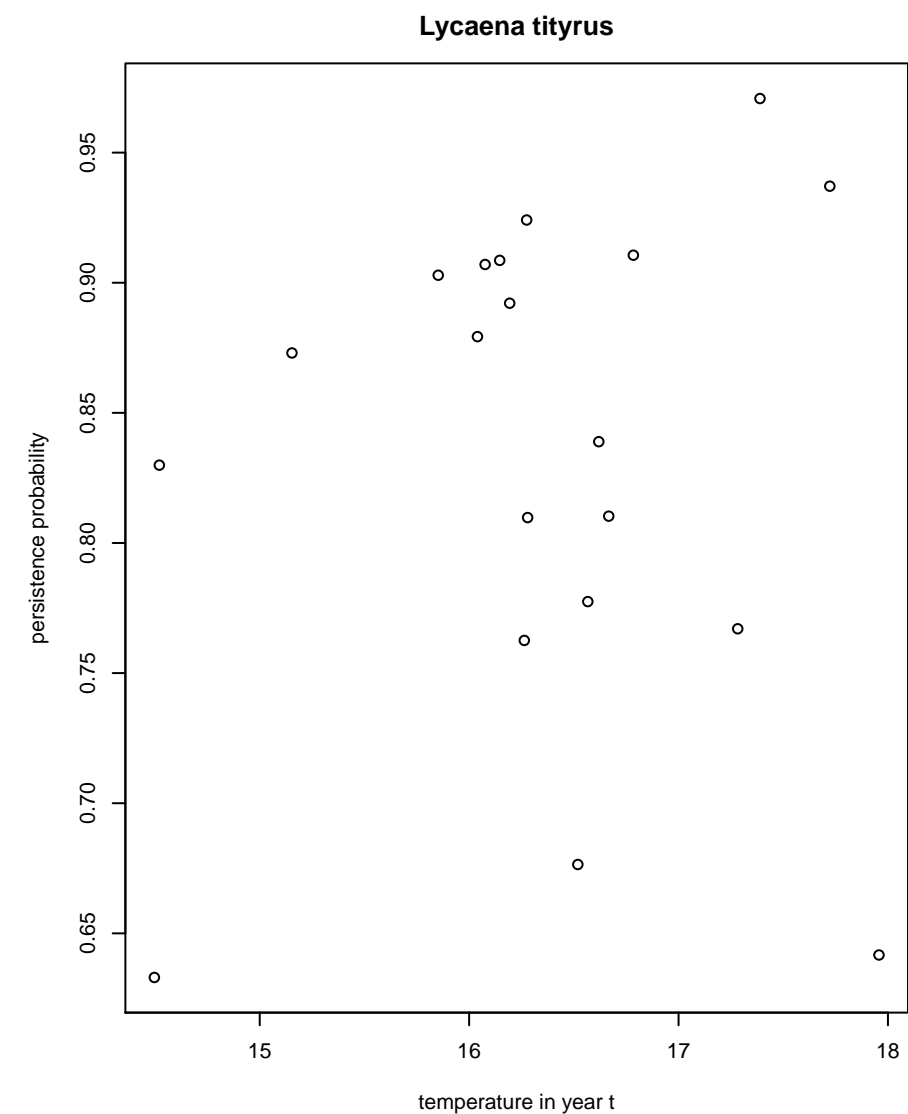

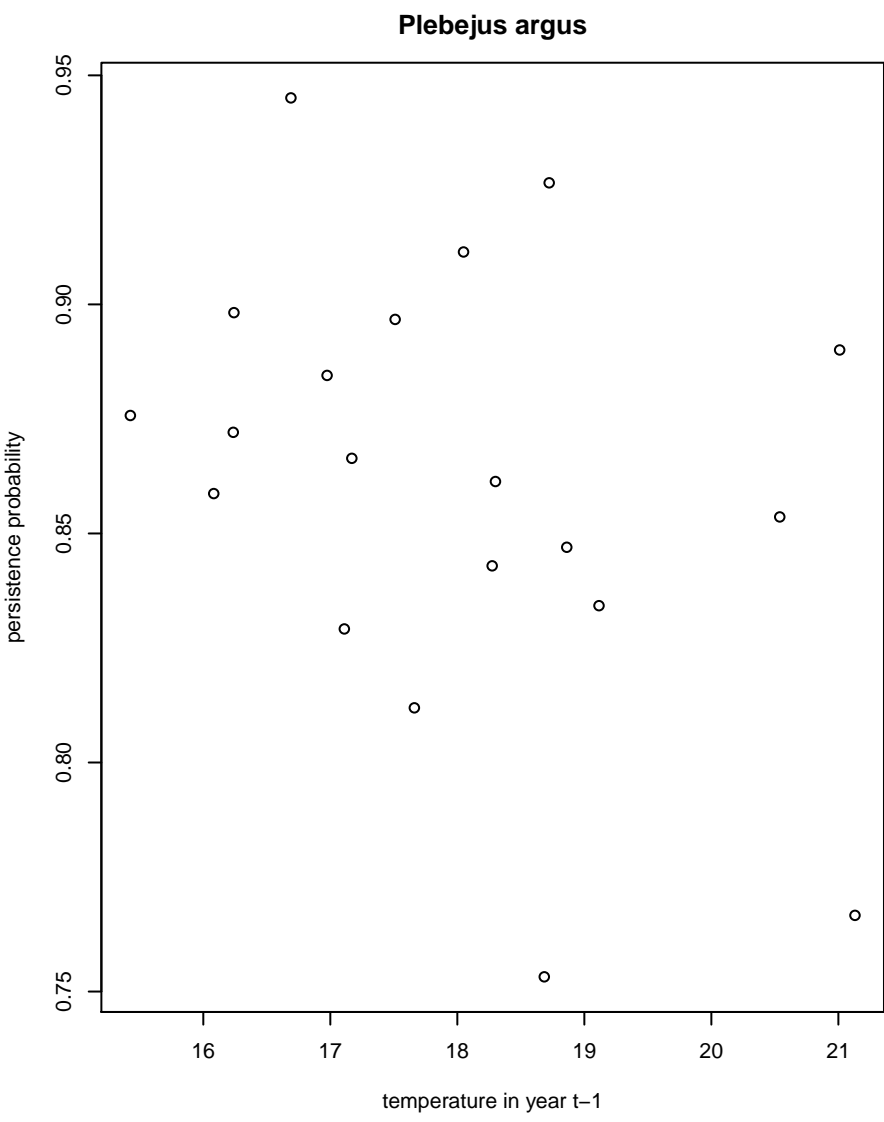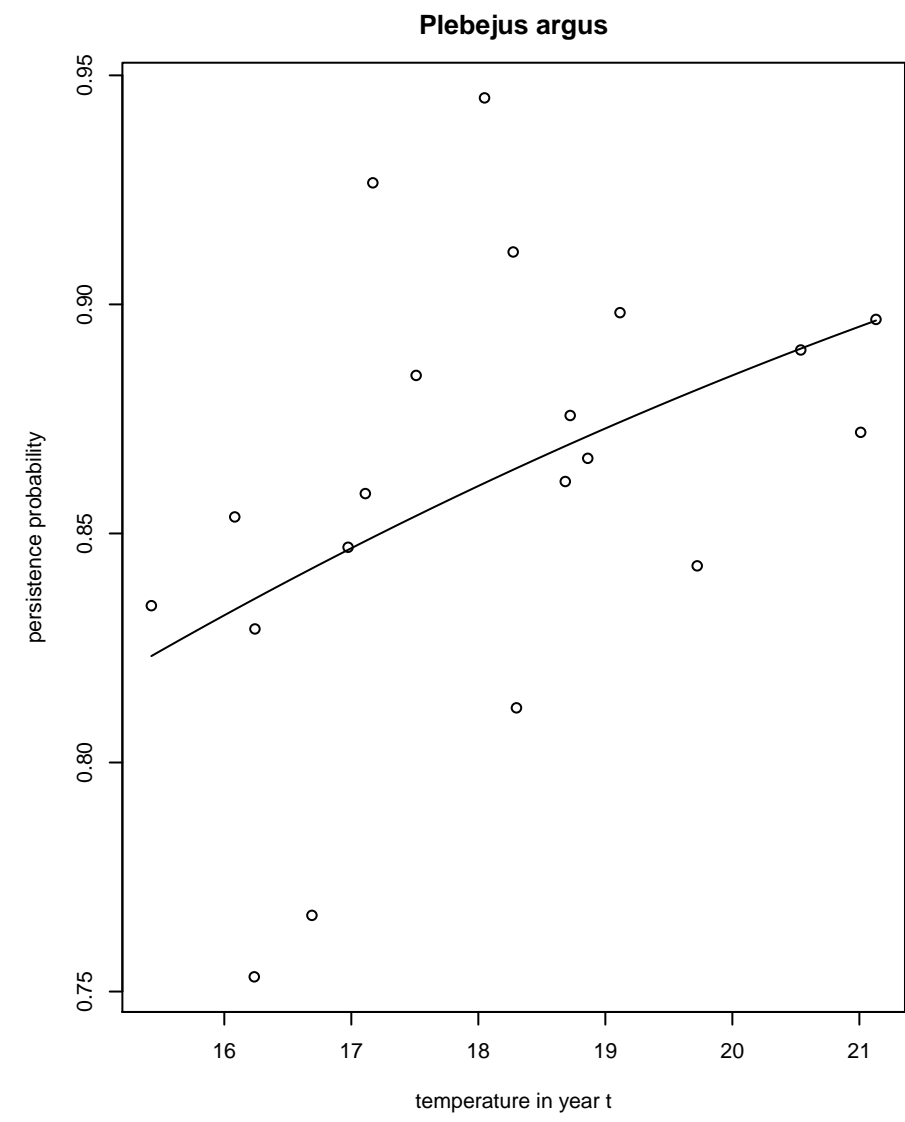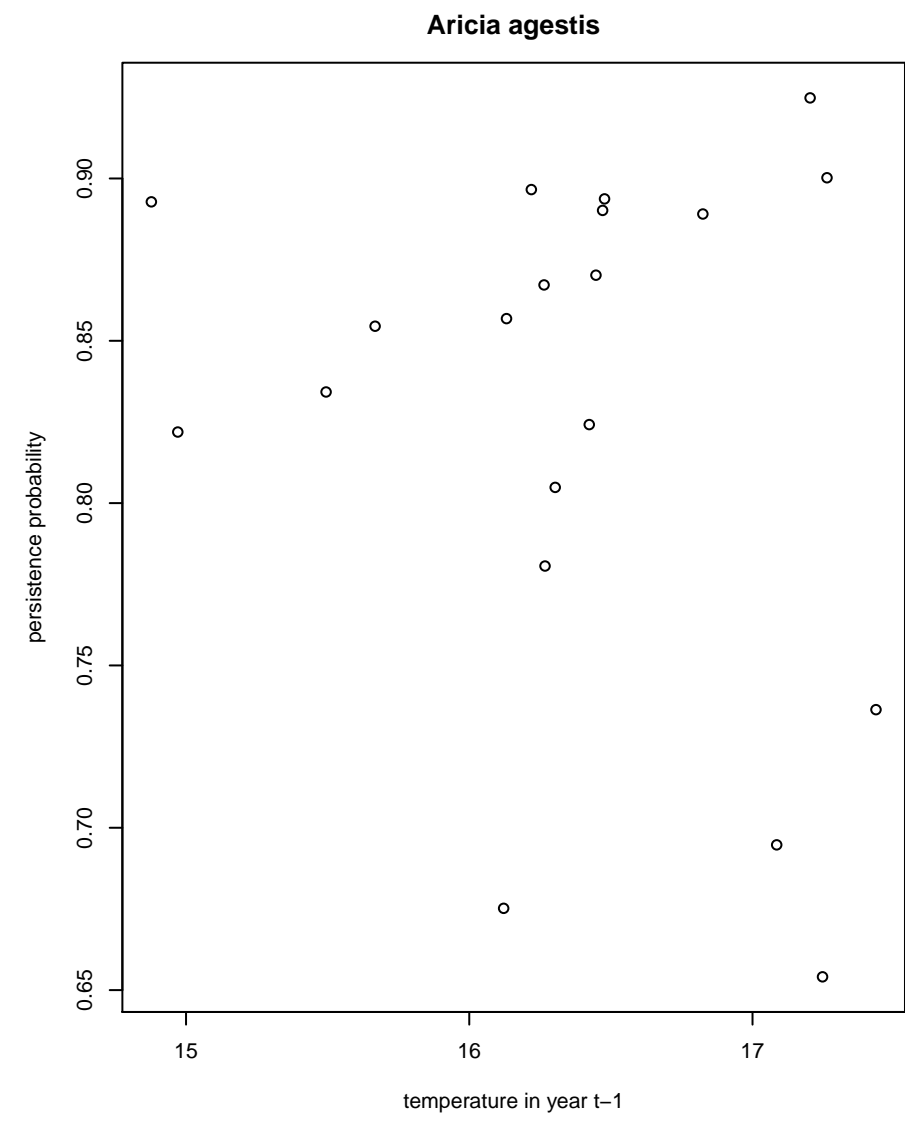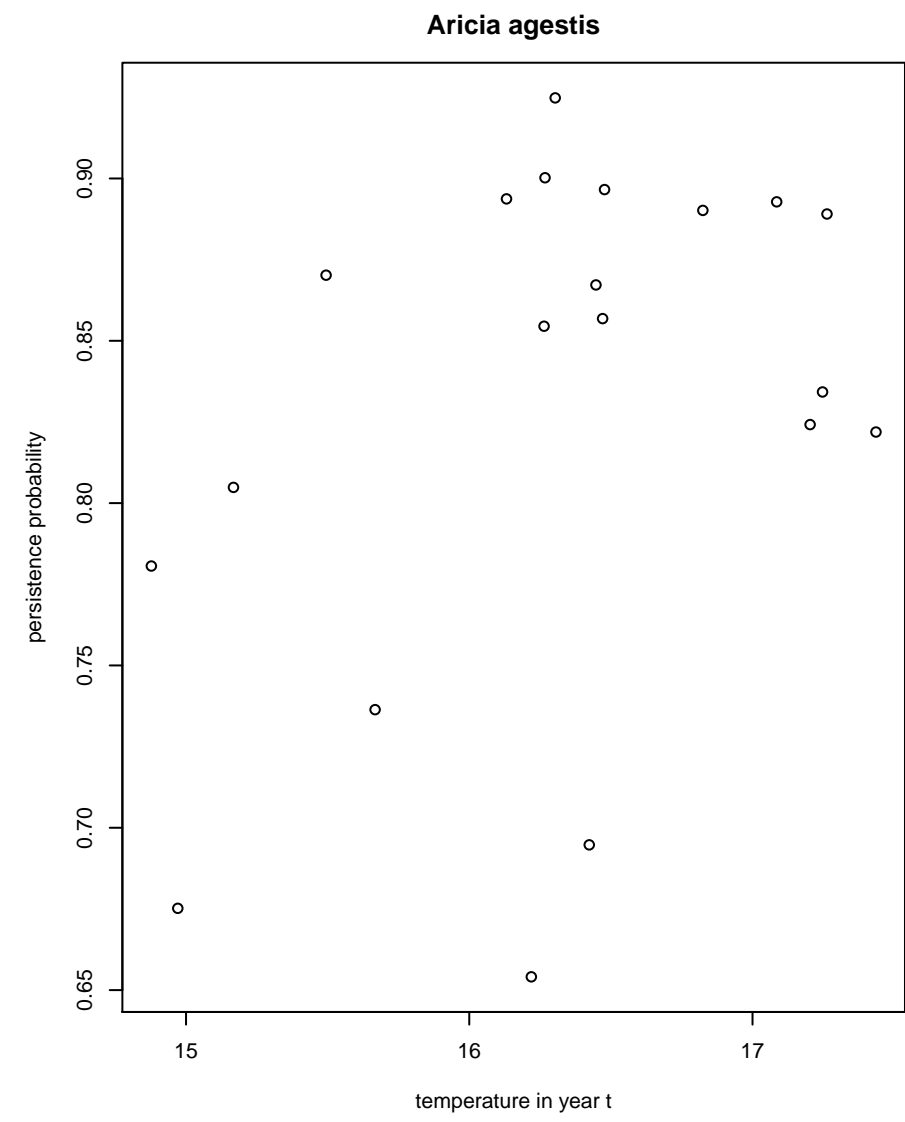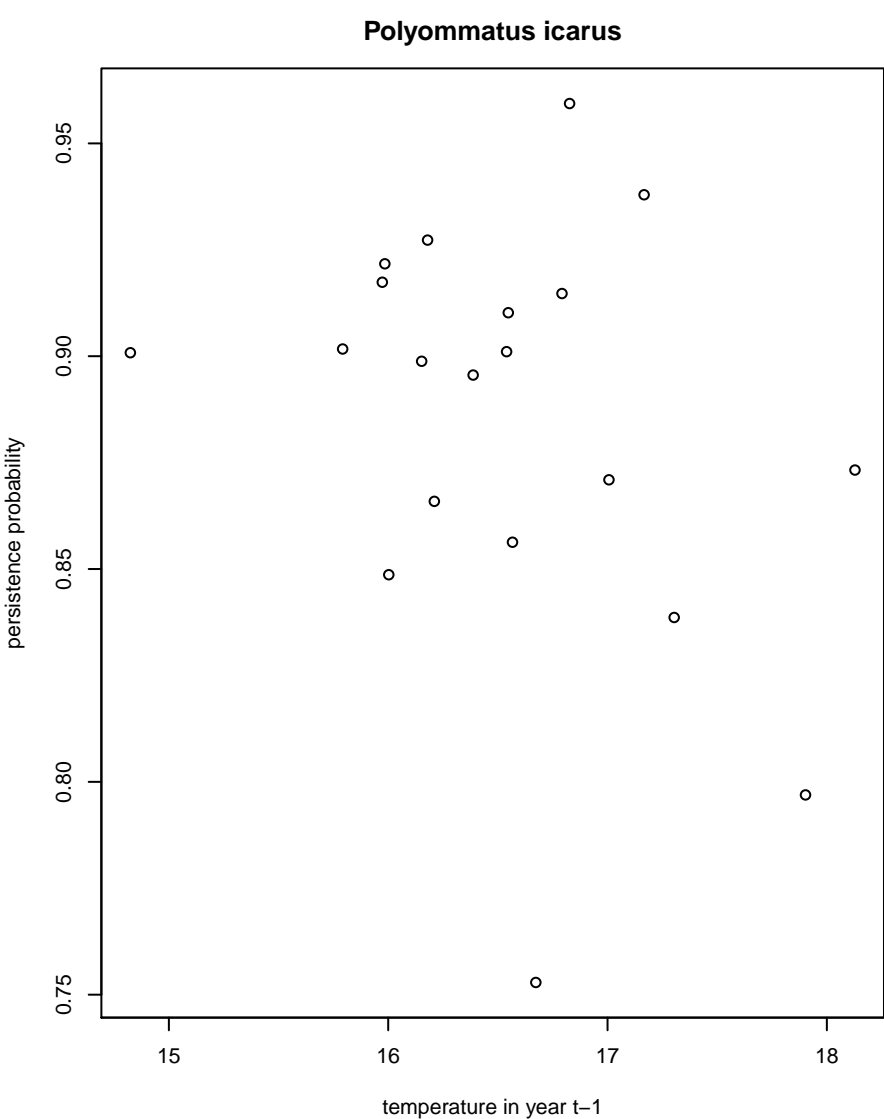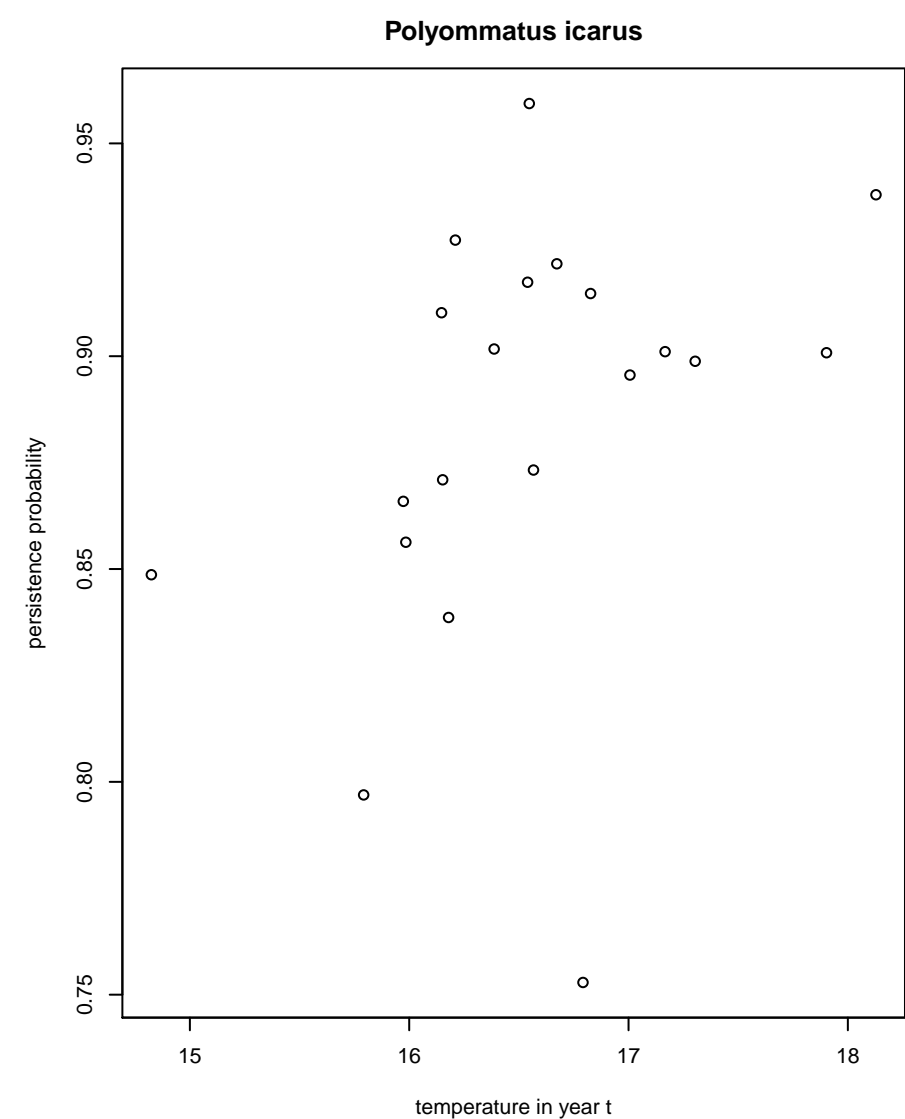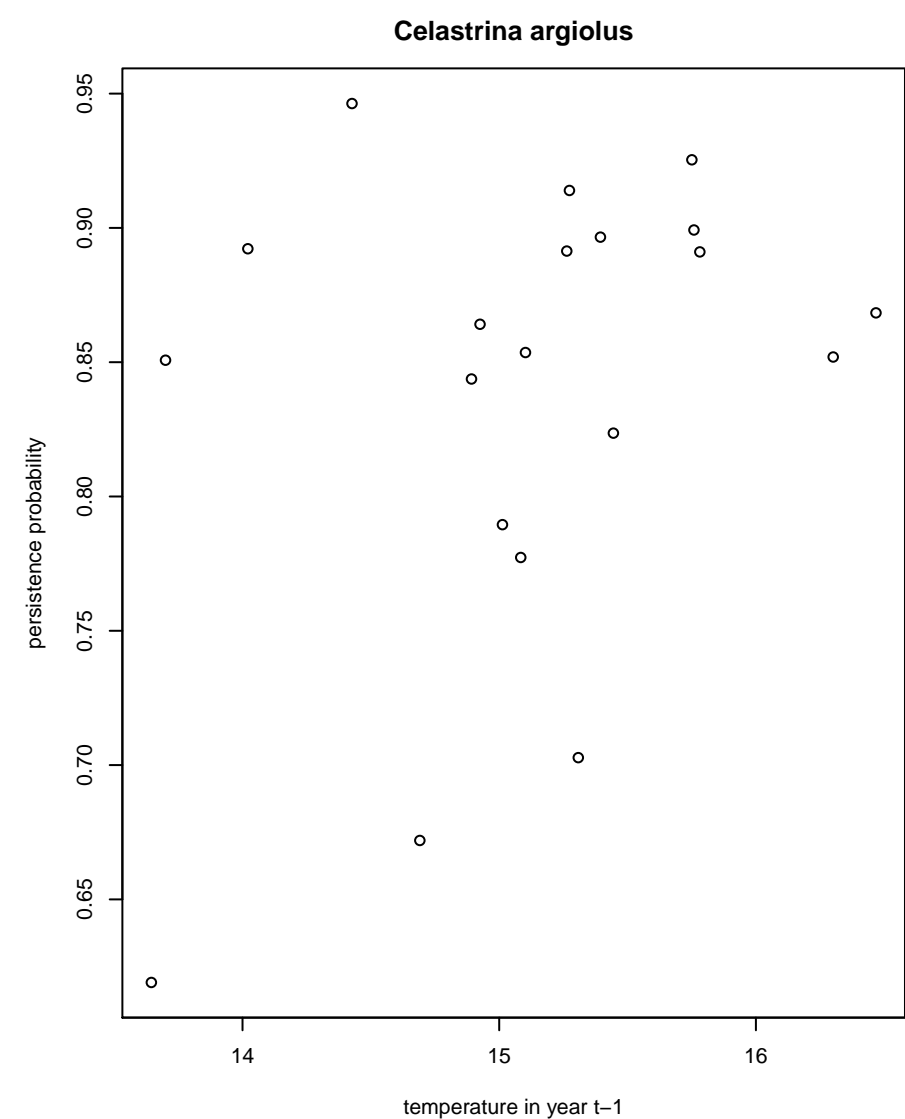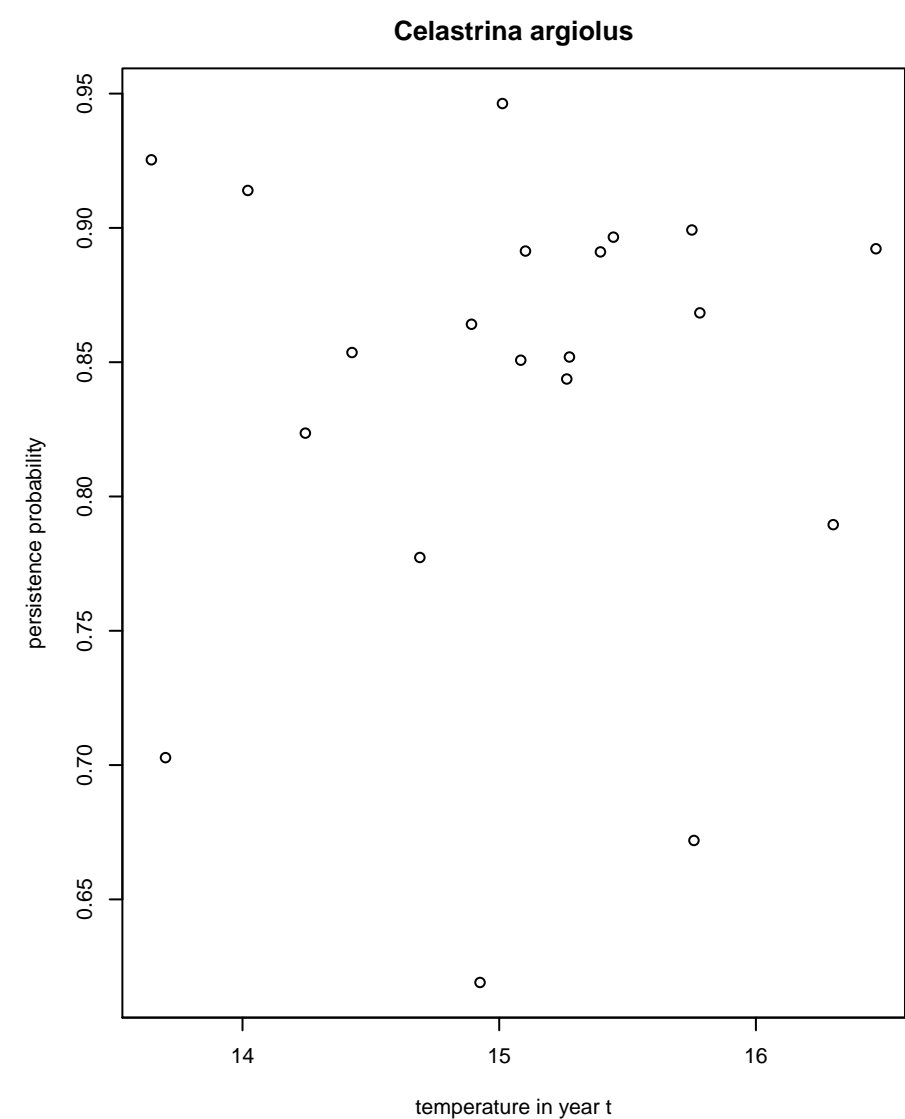

**Hesperia comma**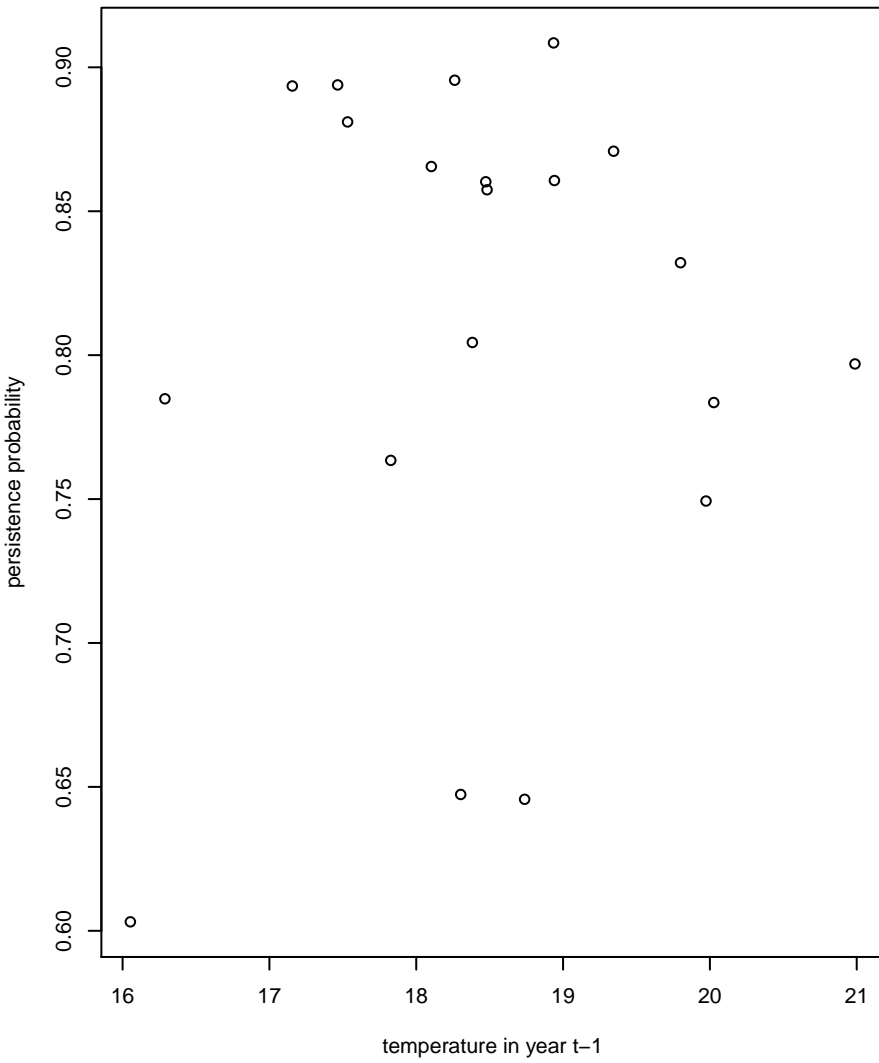**Hesperia comma**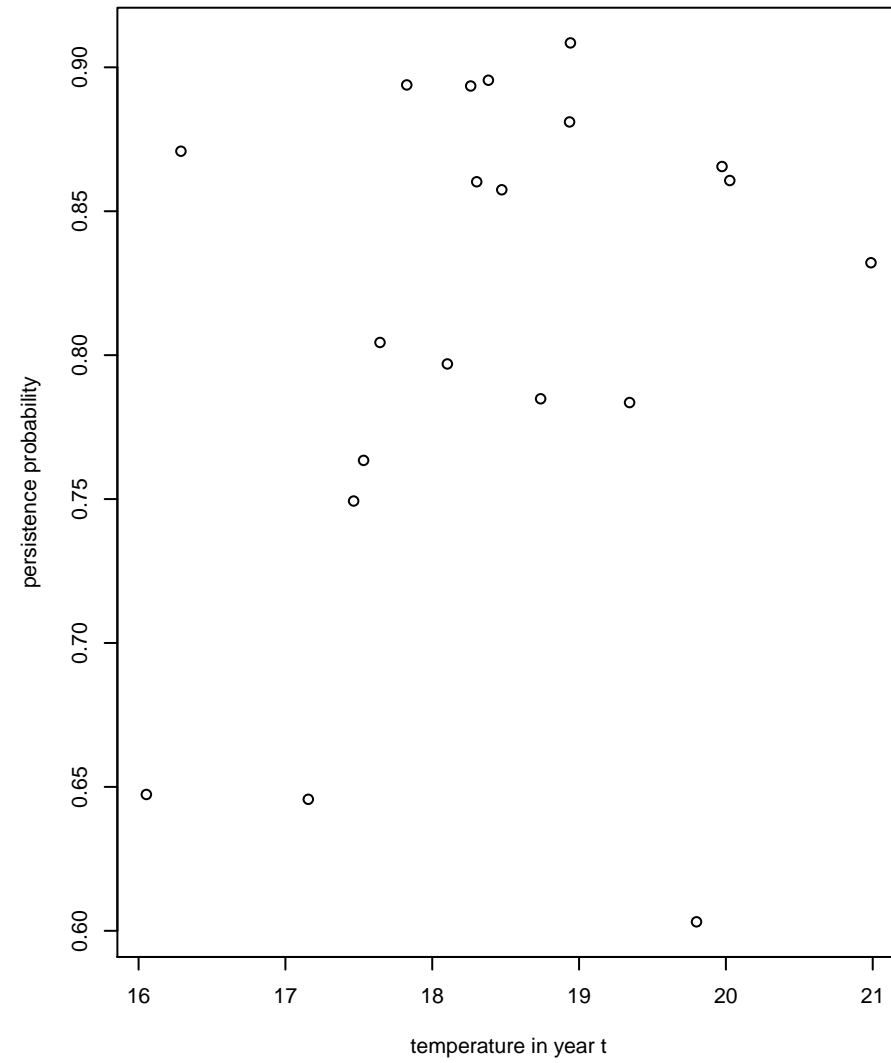**Limenitis camilla**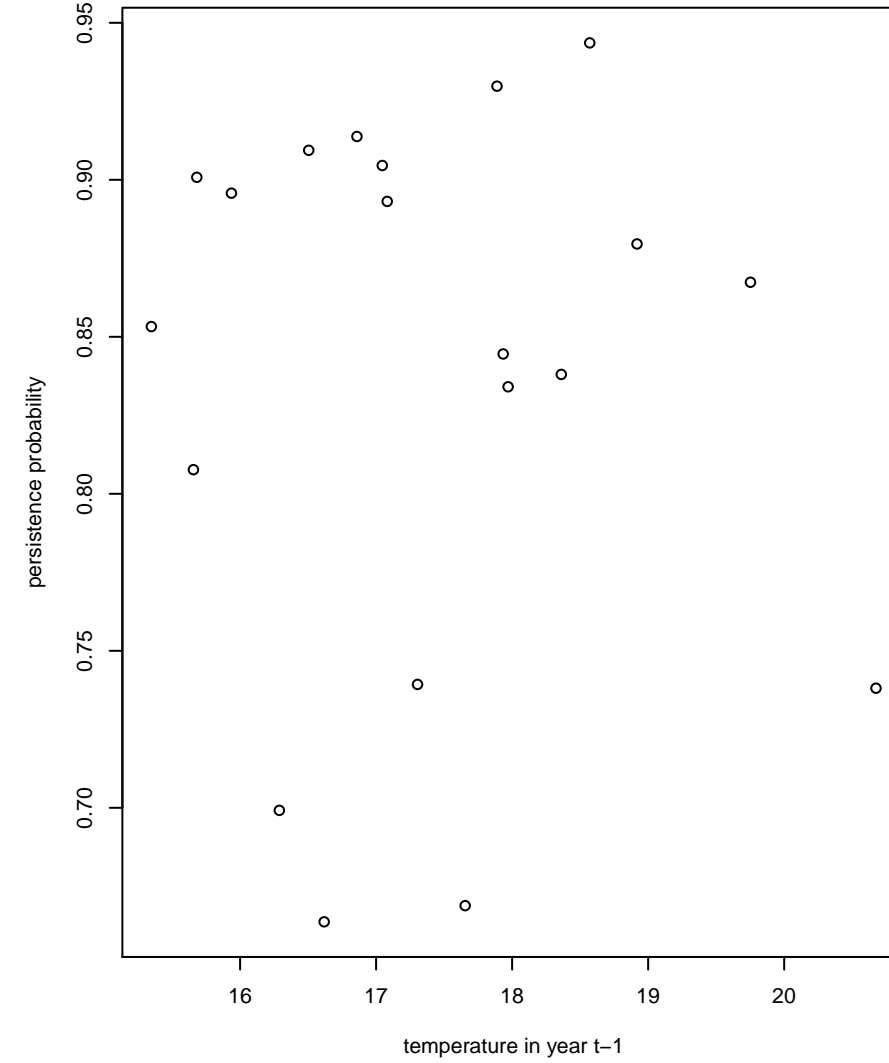**Limenitis camilla**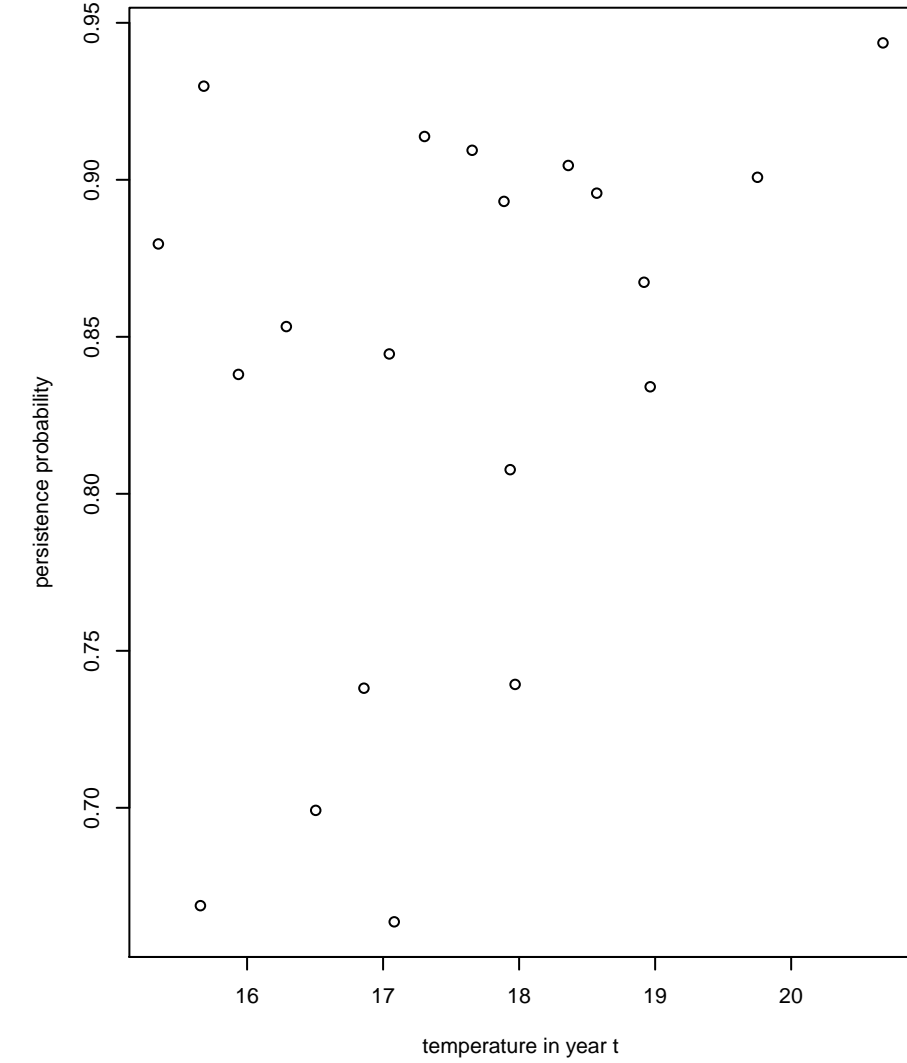**Ochlodes sylvanus**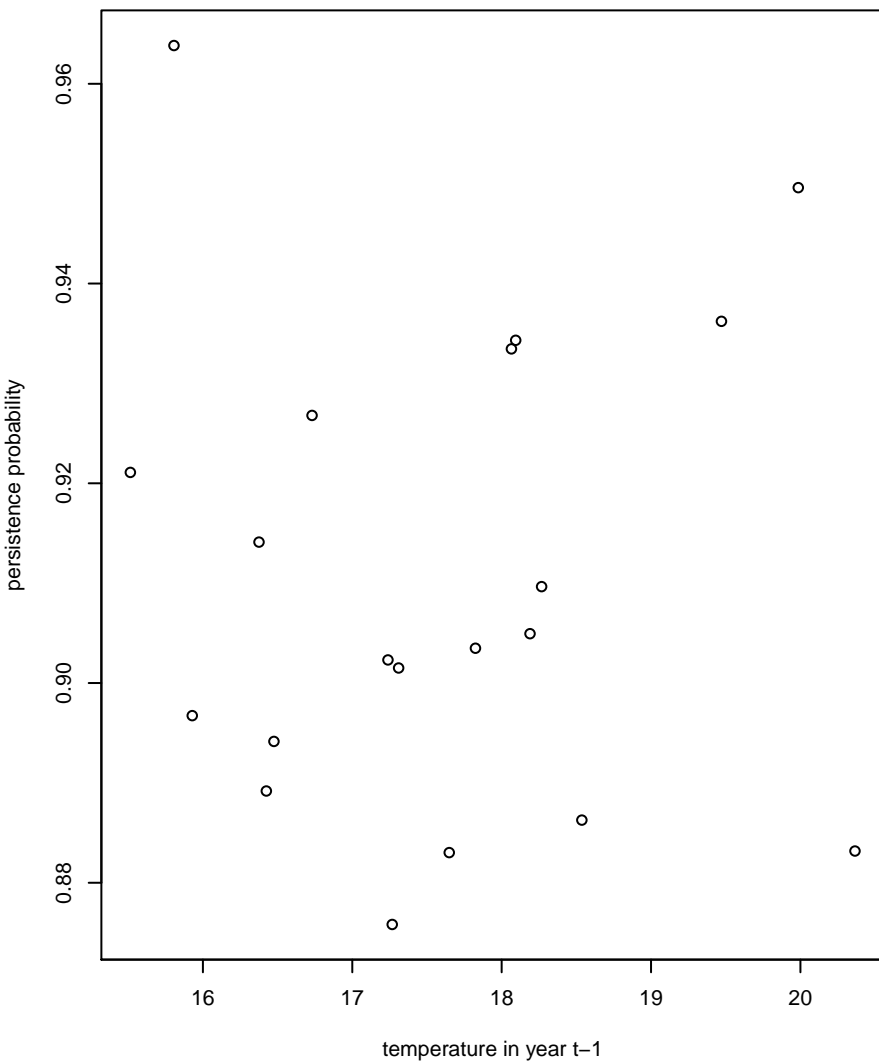**Ochlodes sylvanus**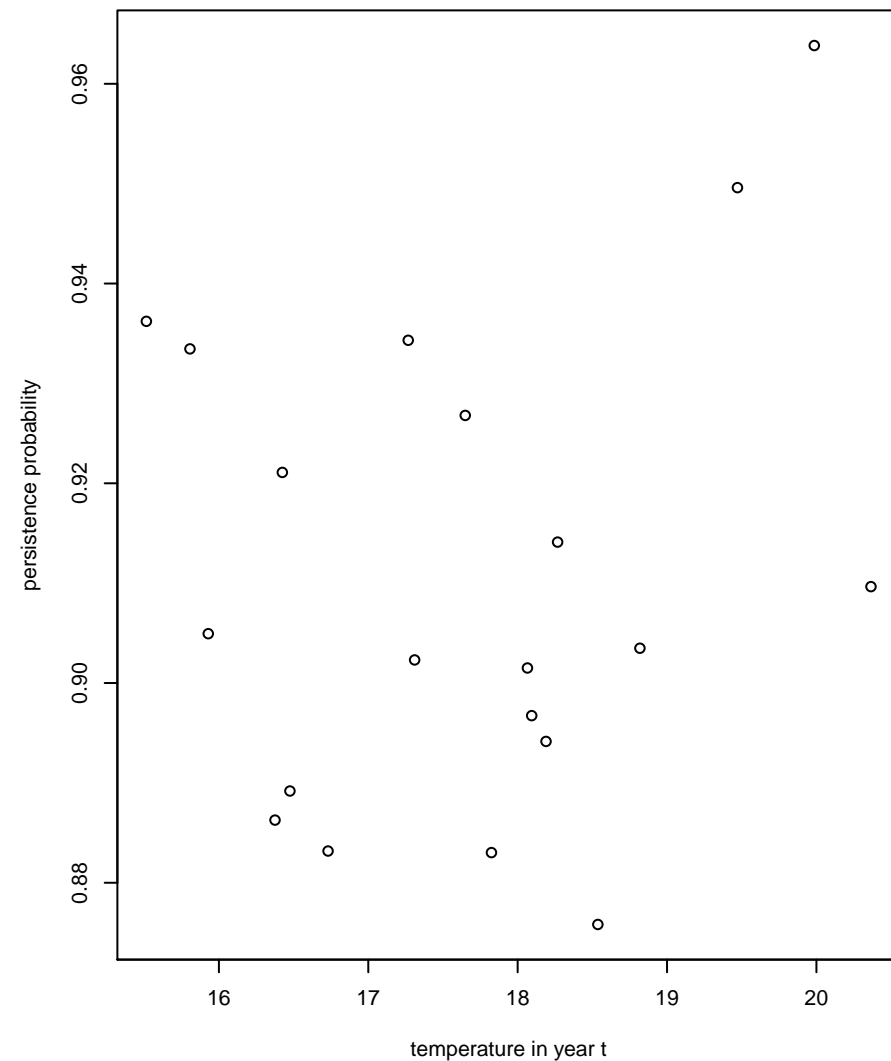**Aglais urticae**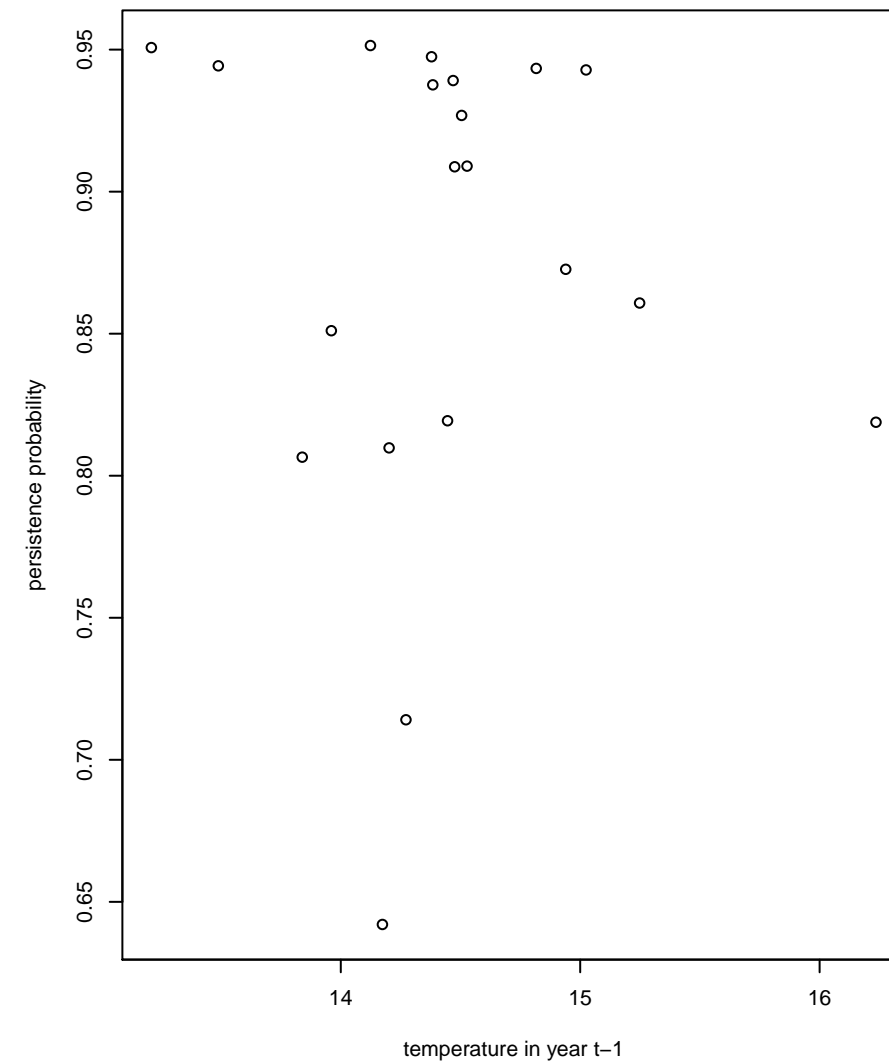**Aglais urticae**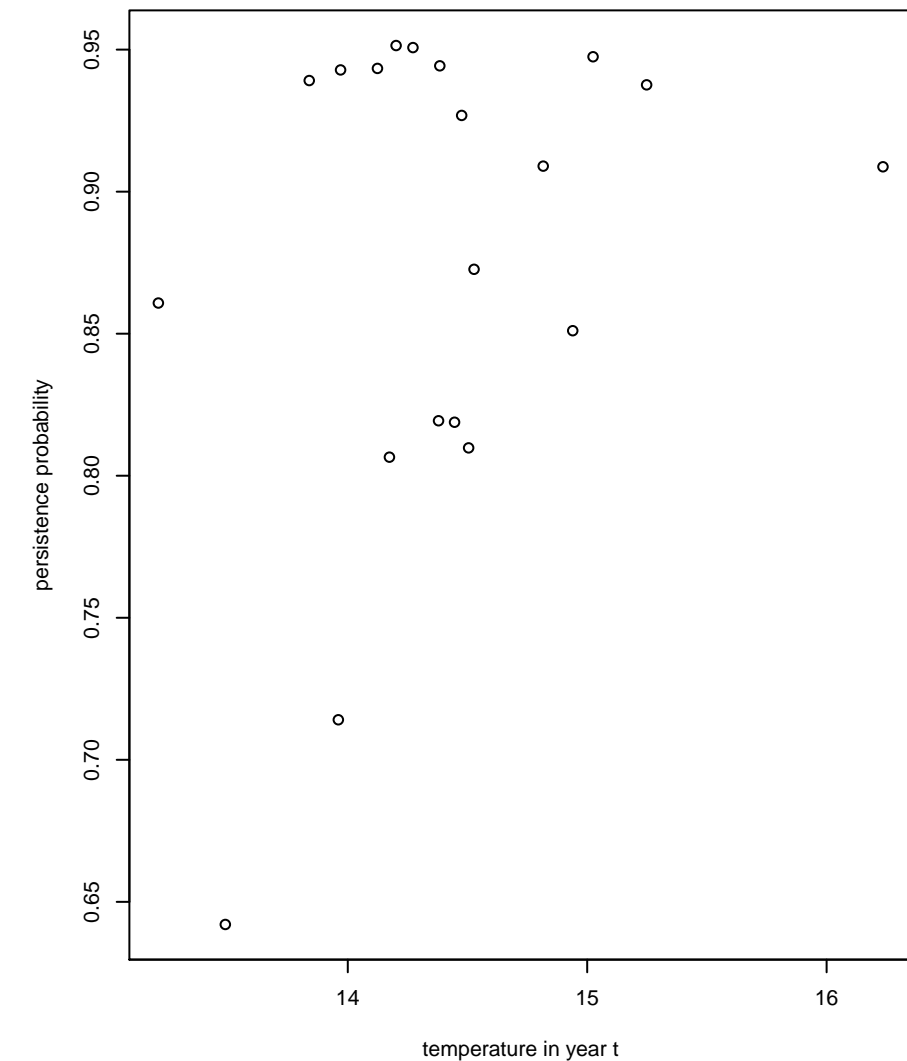



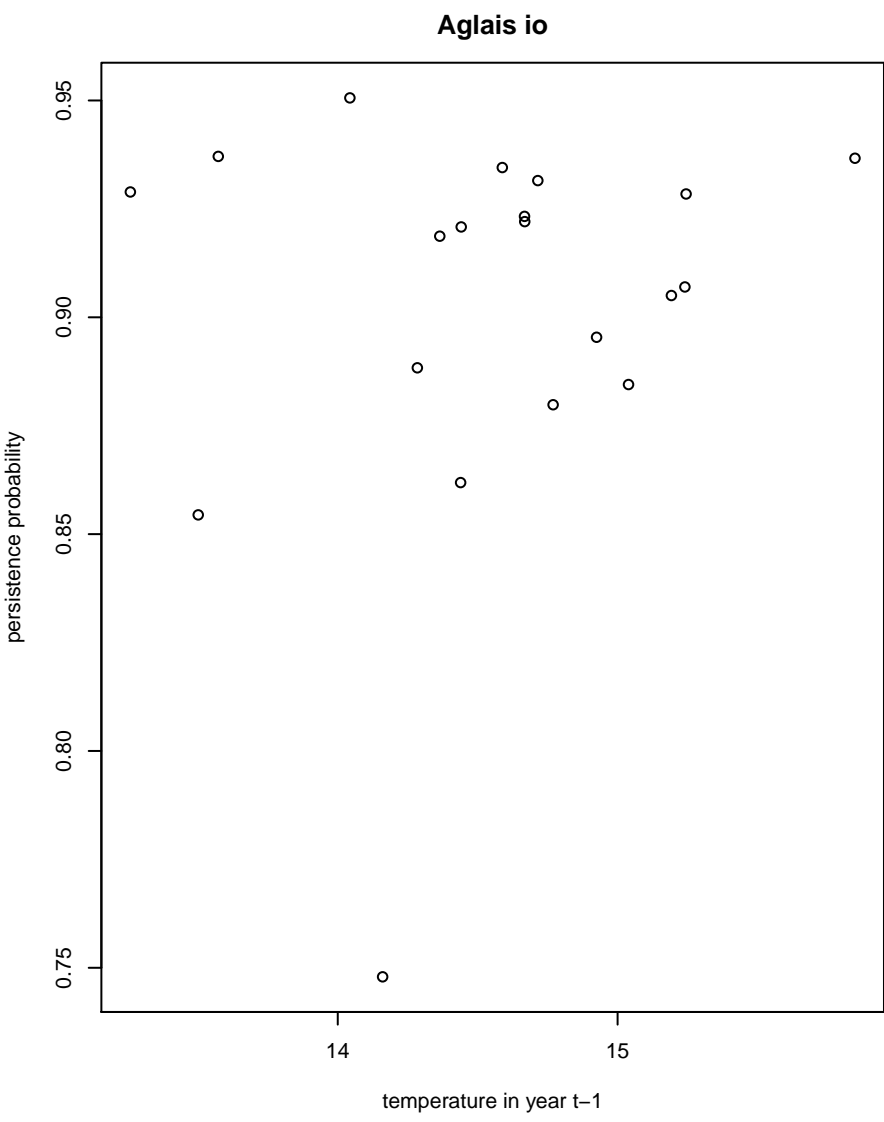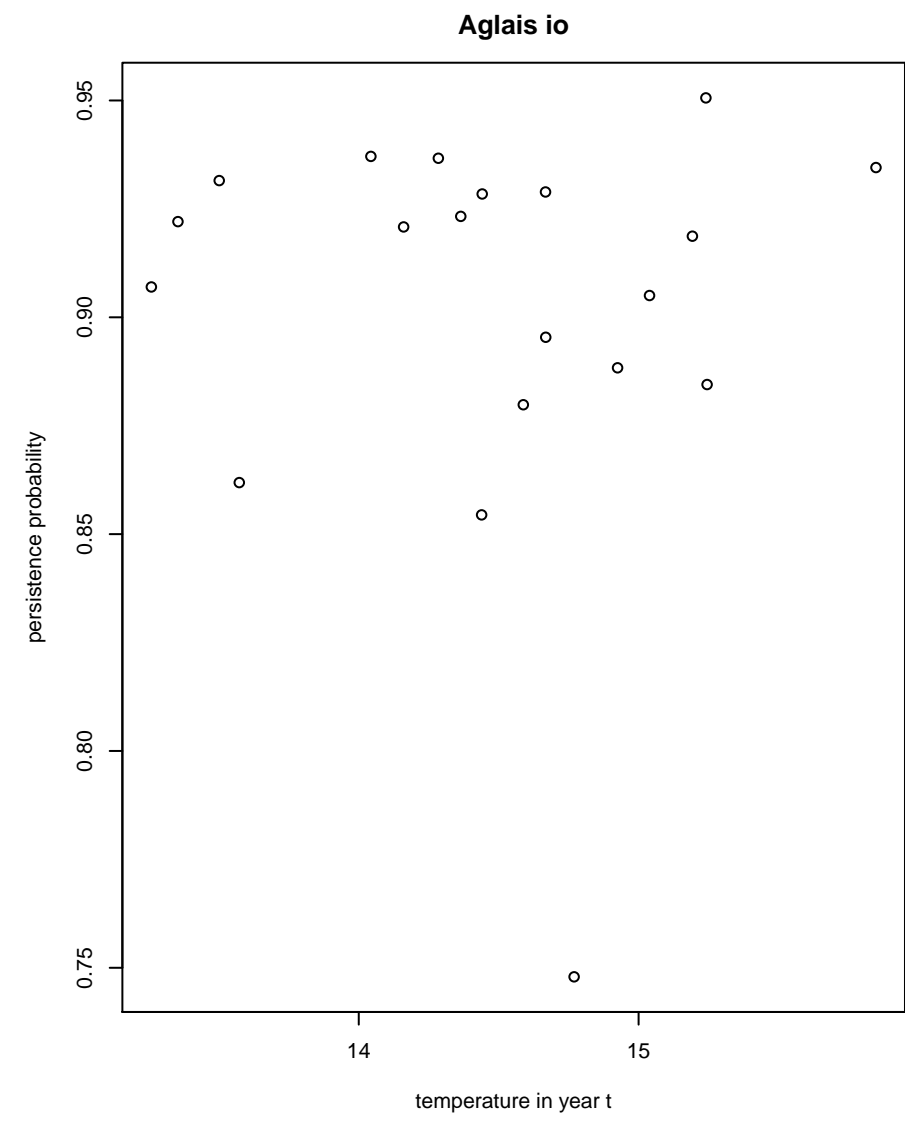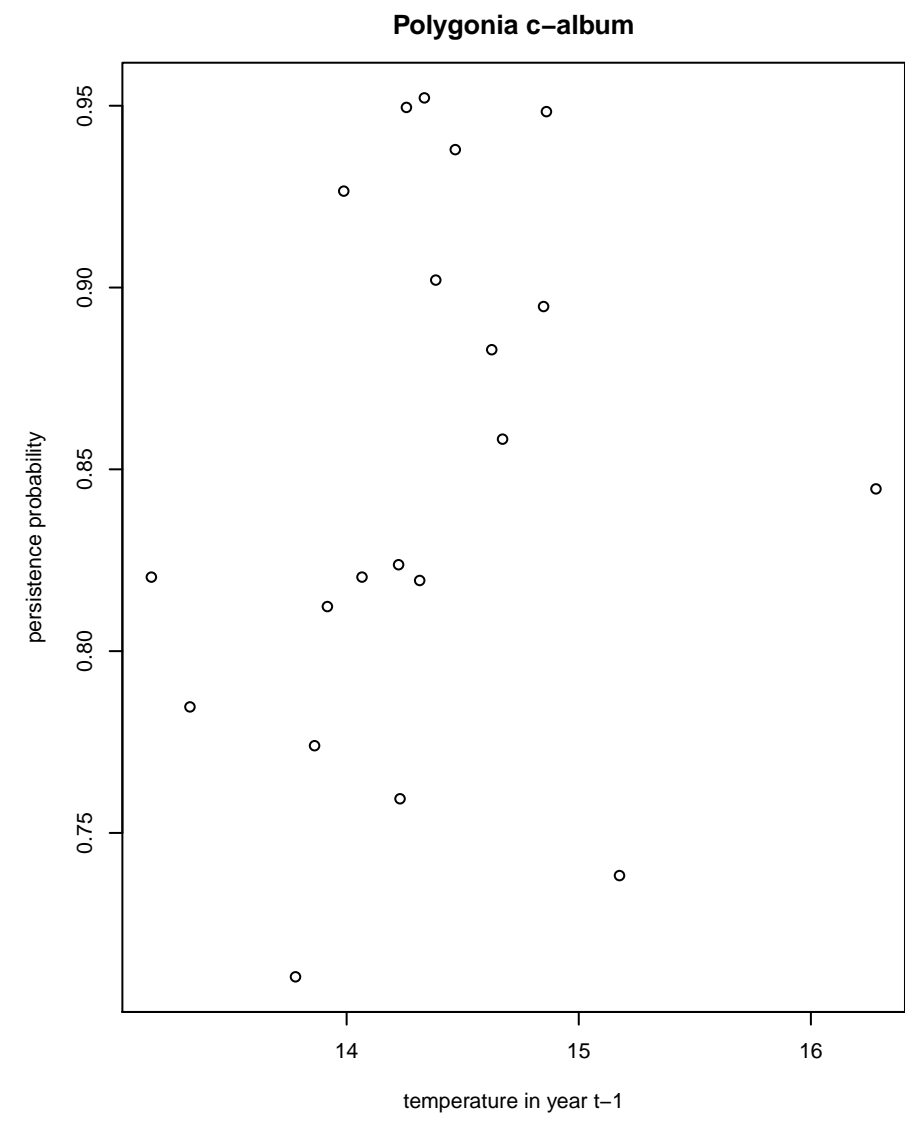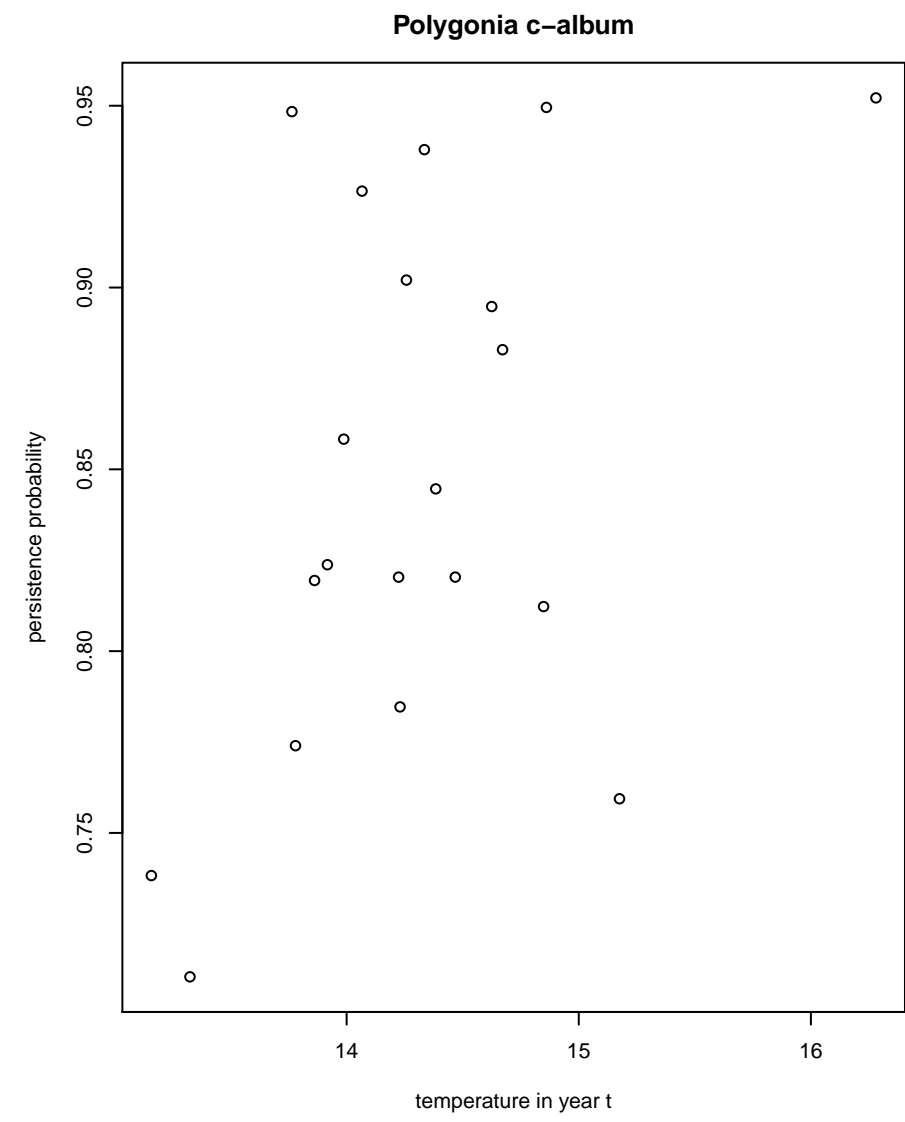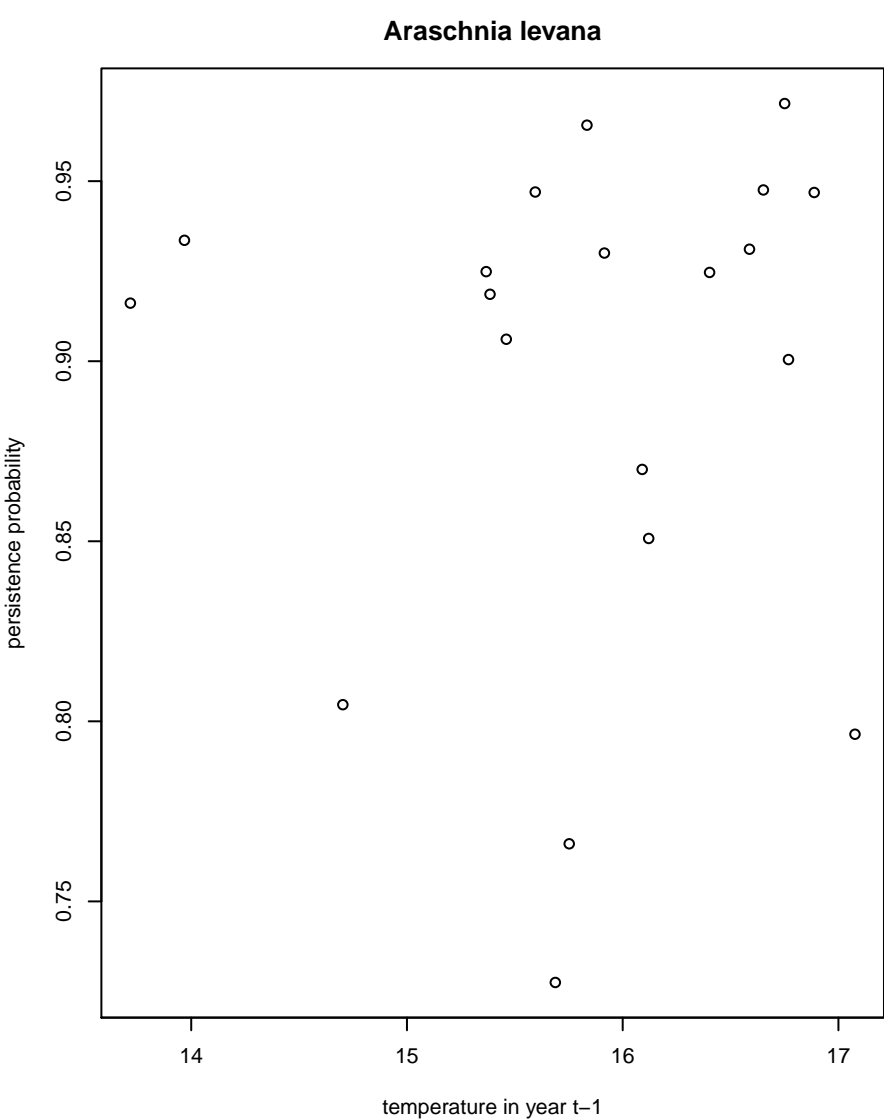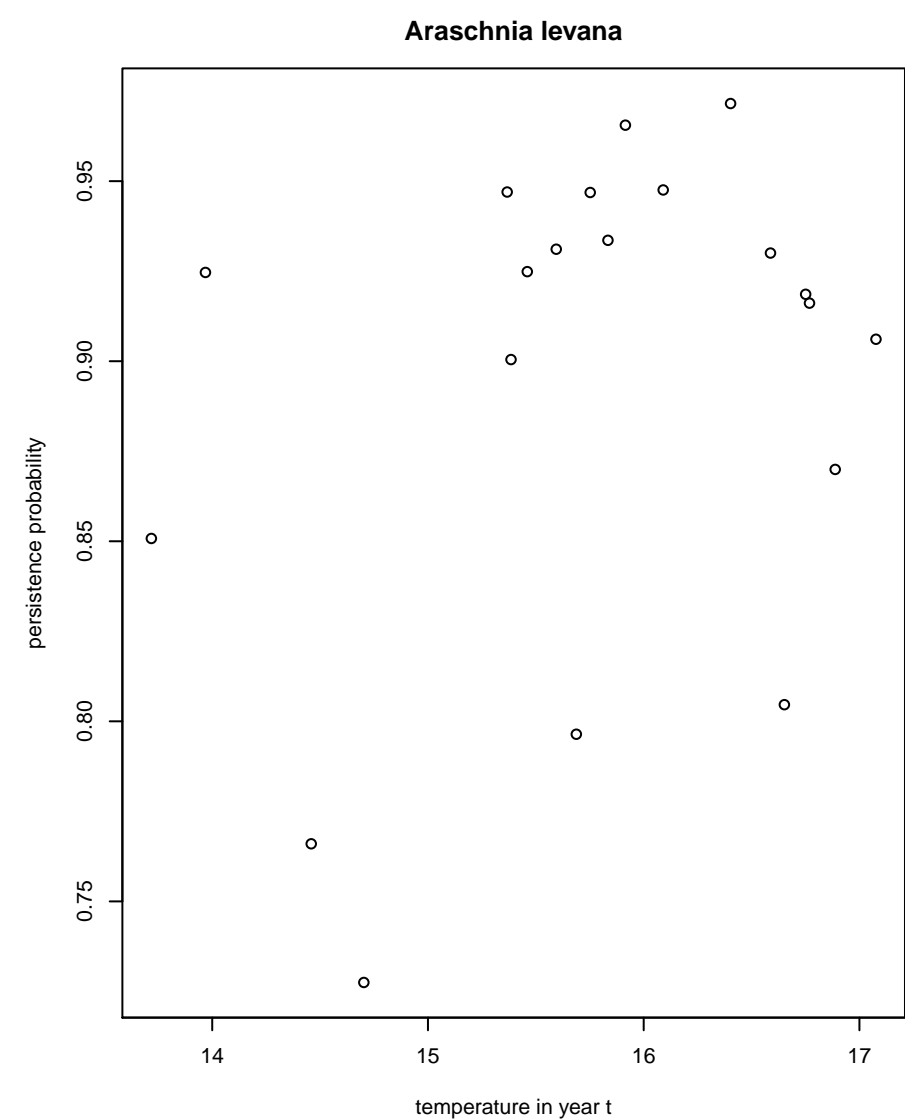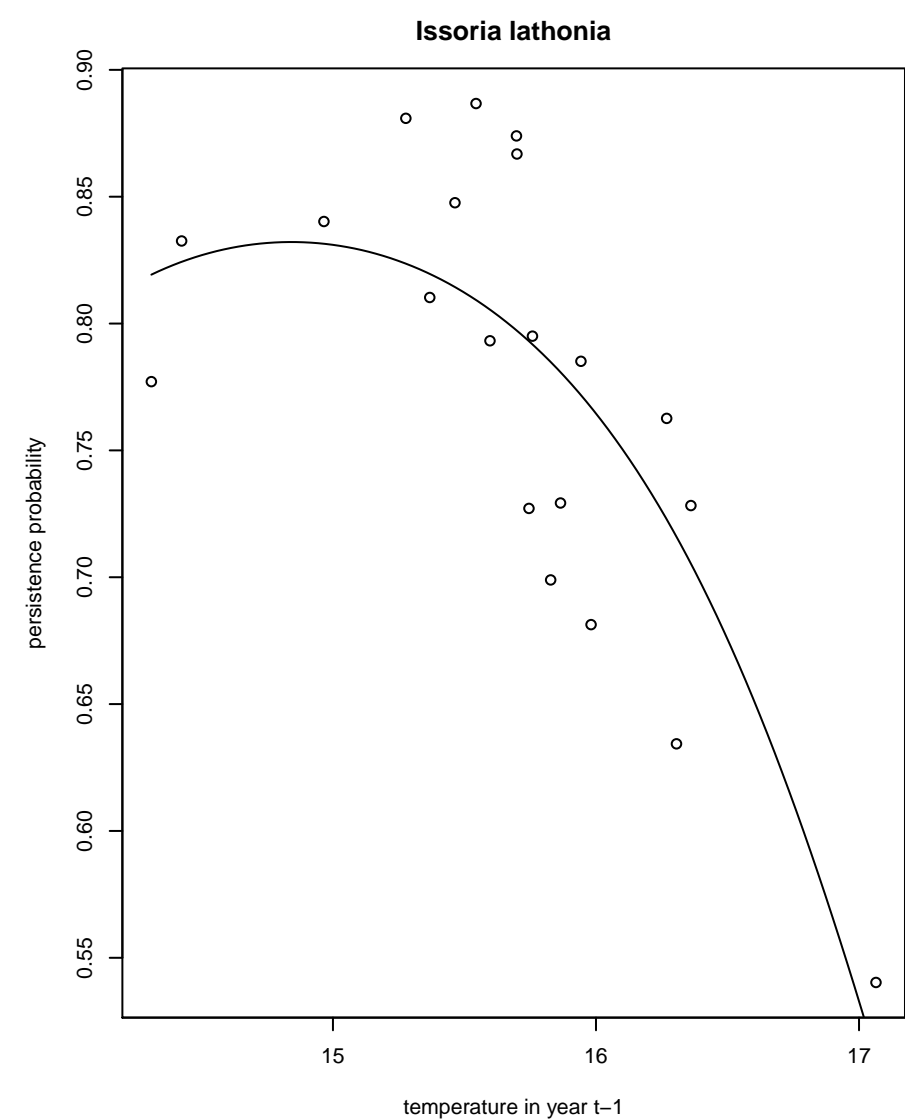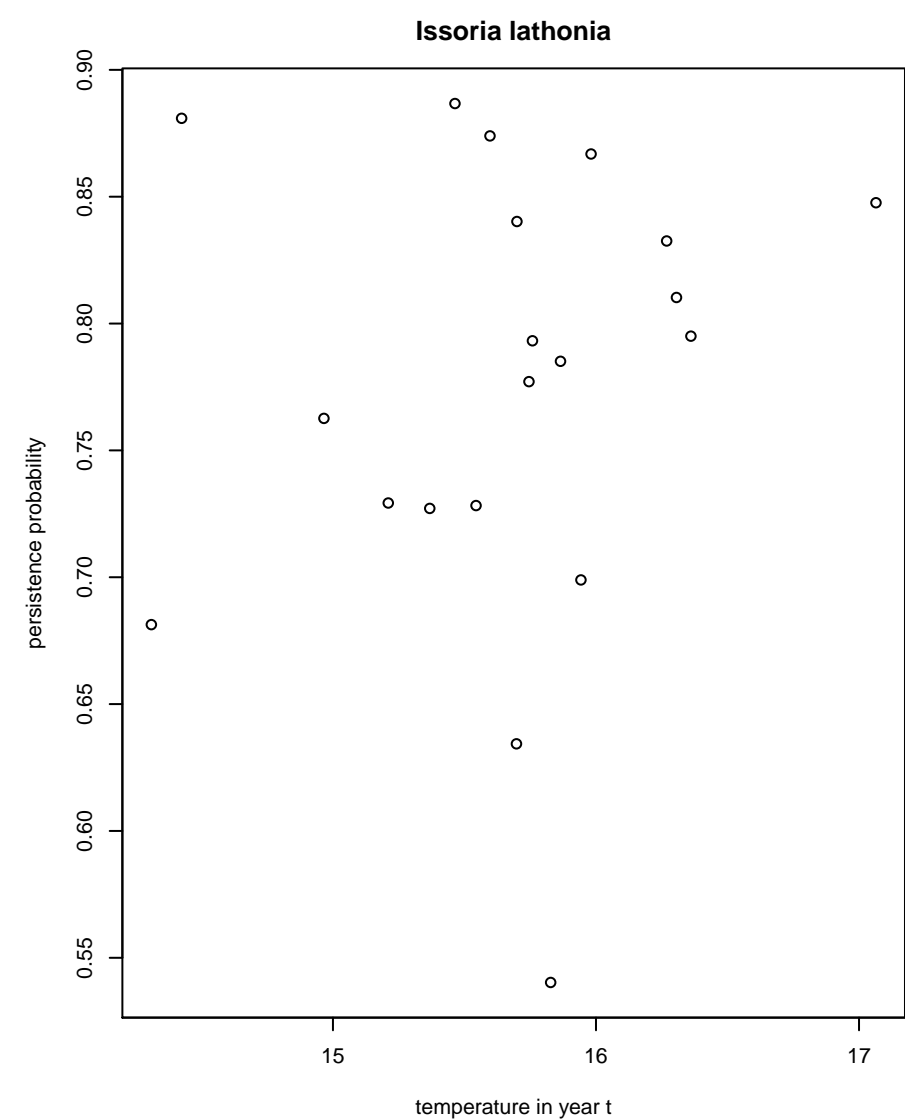

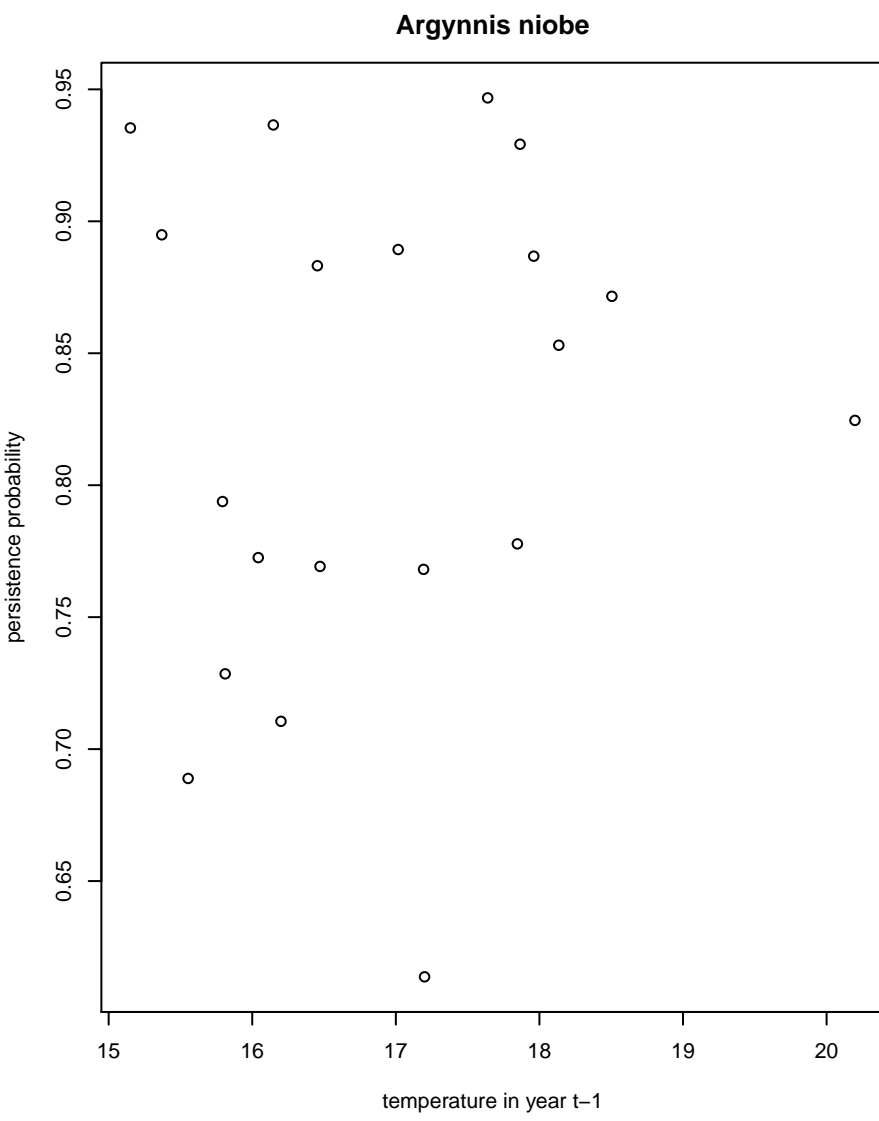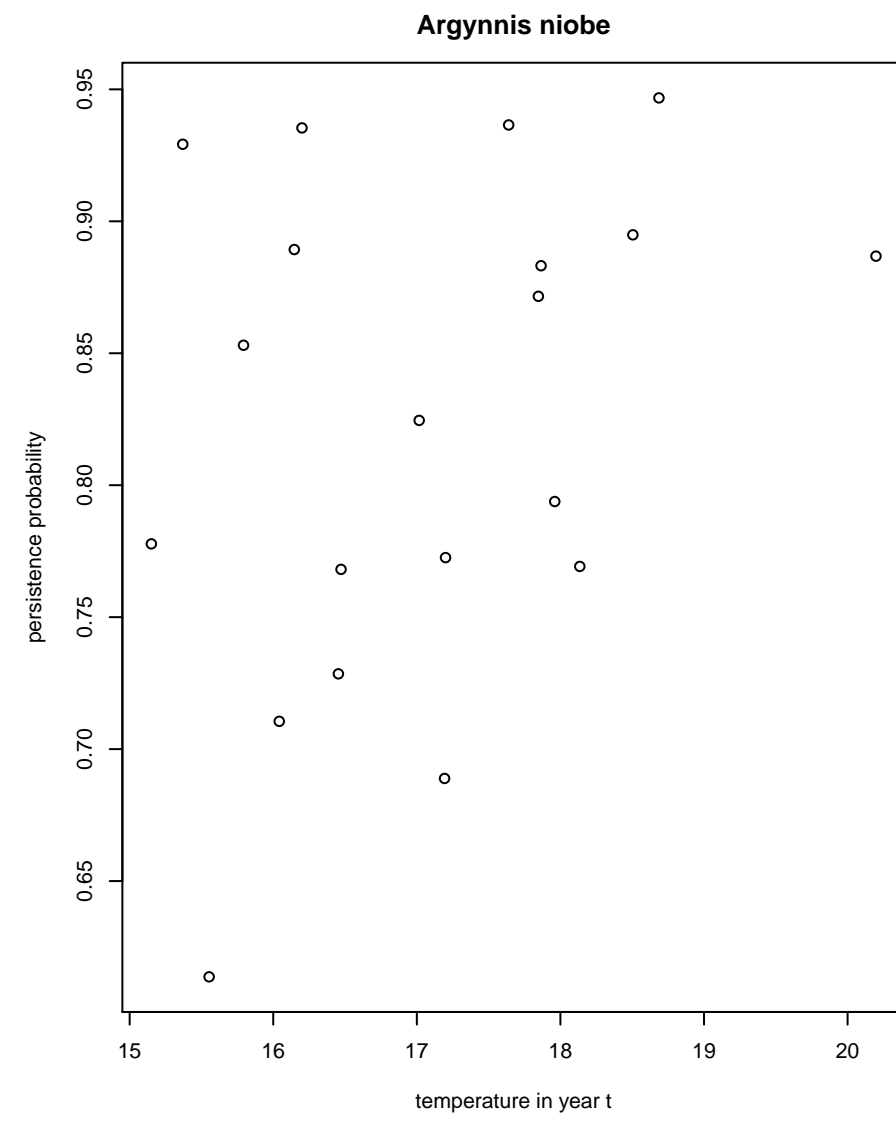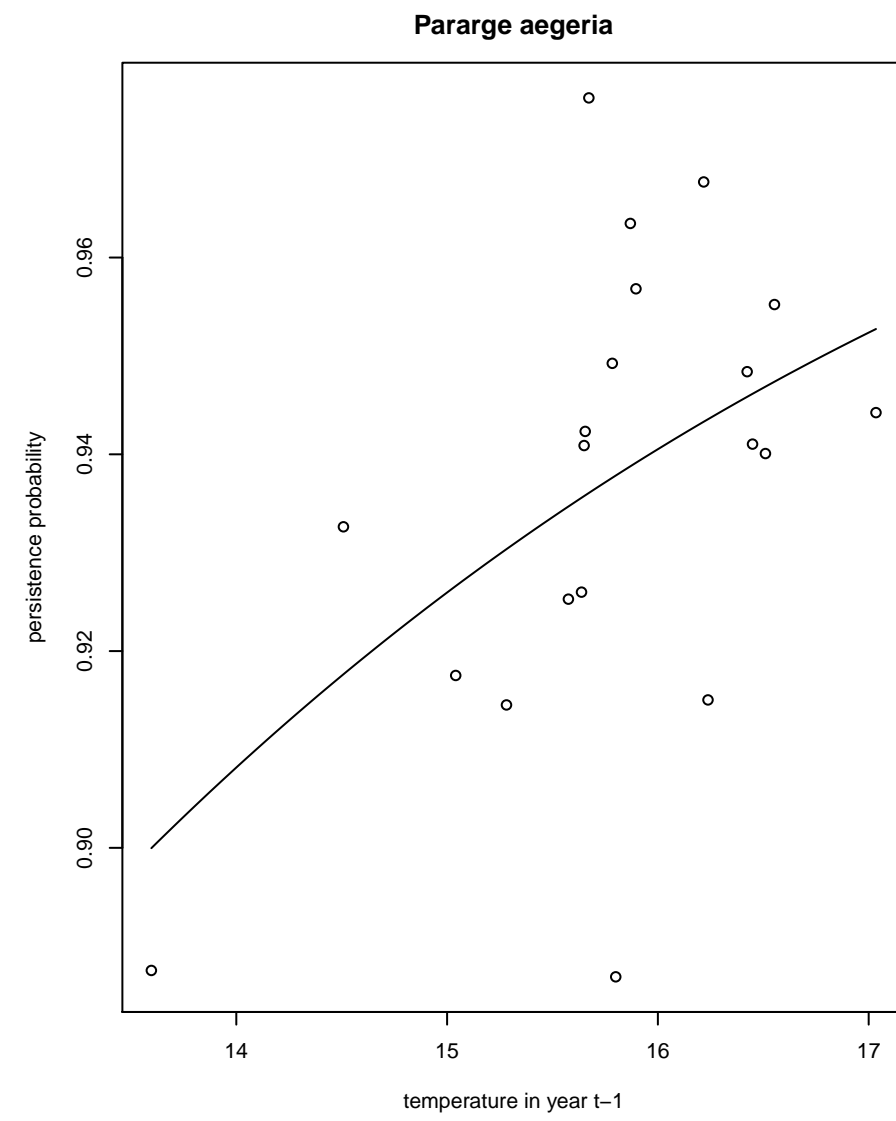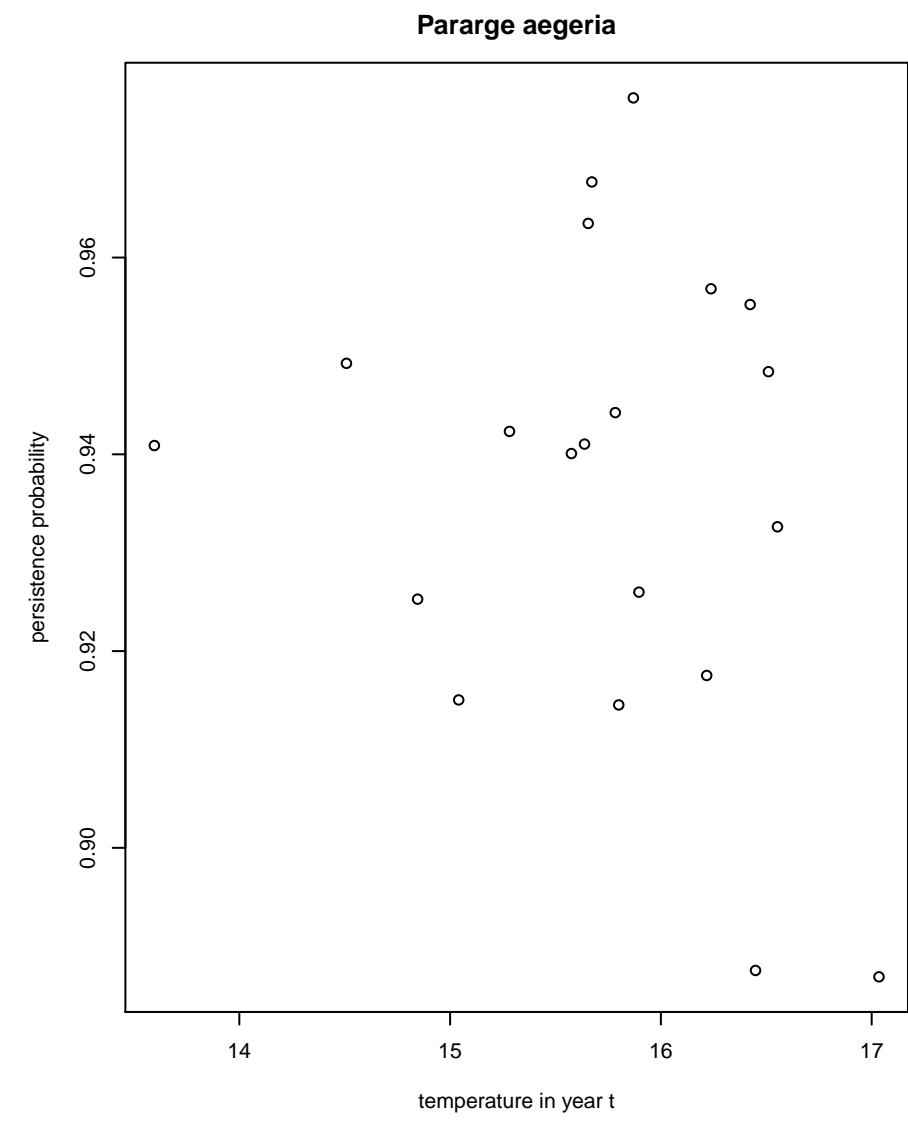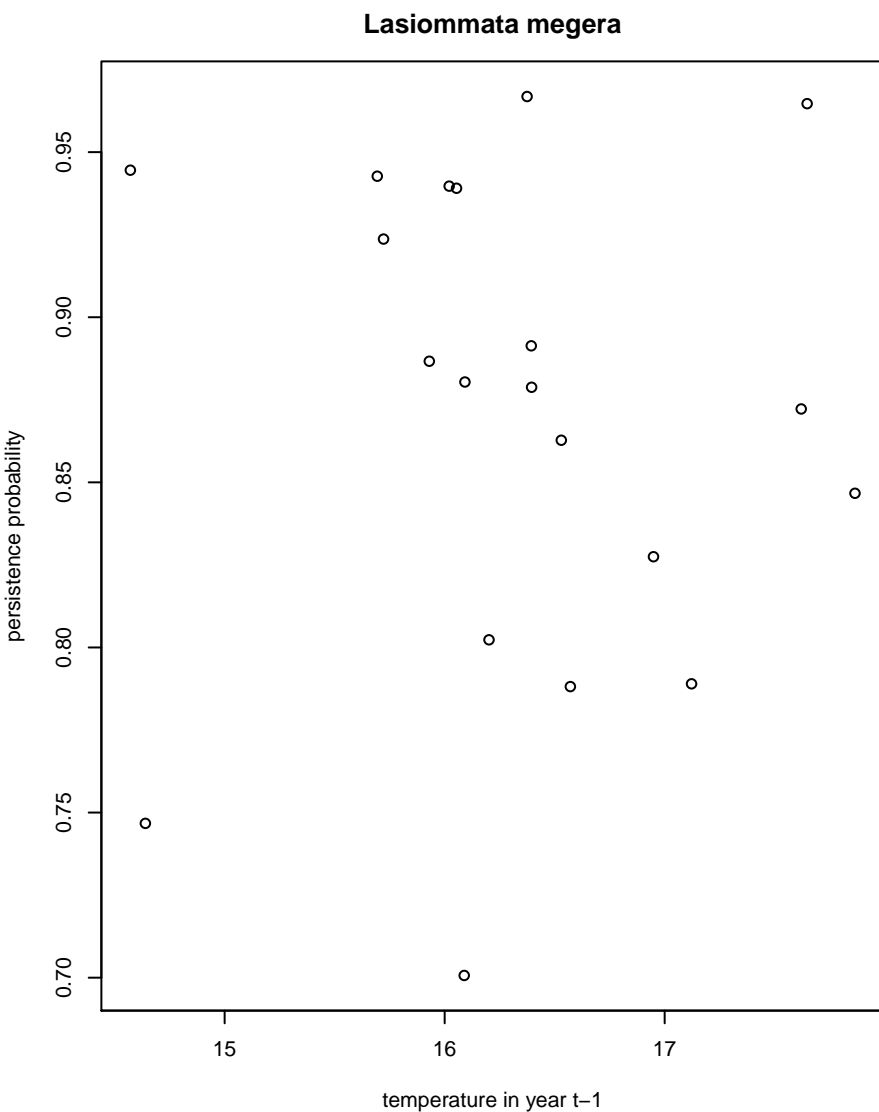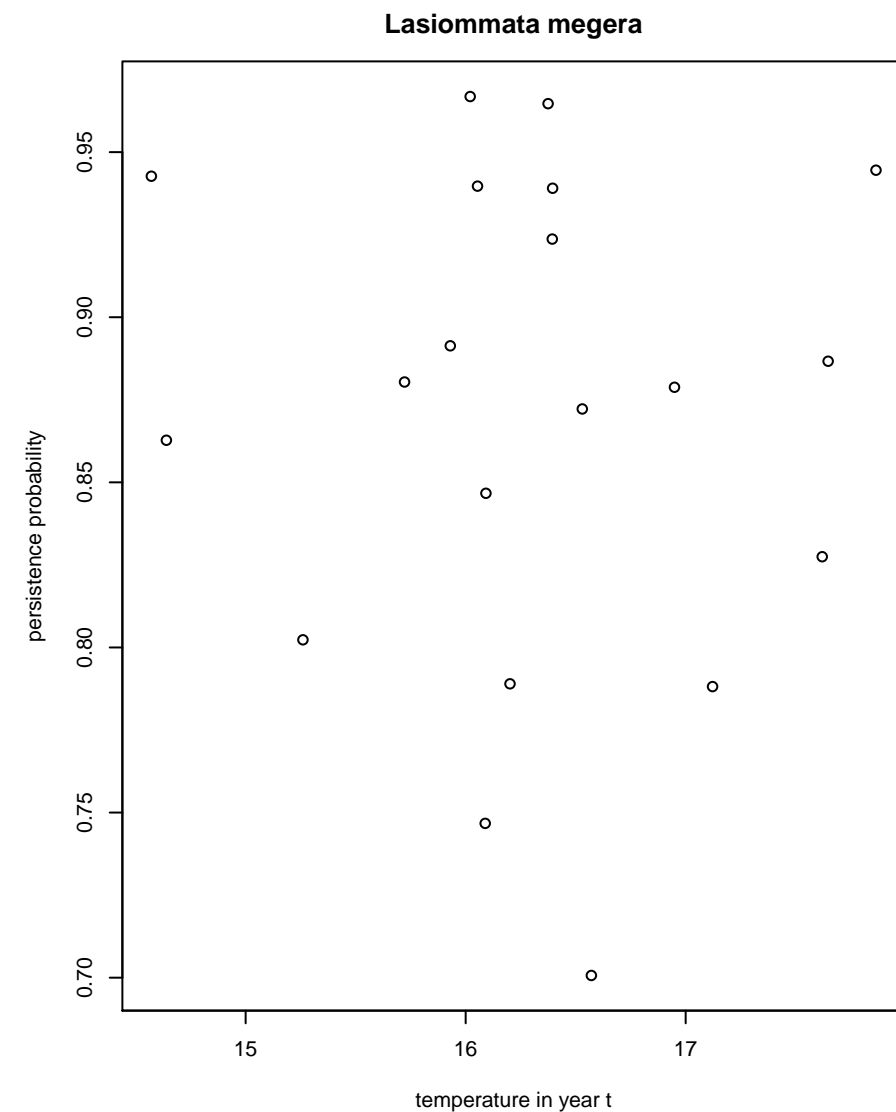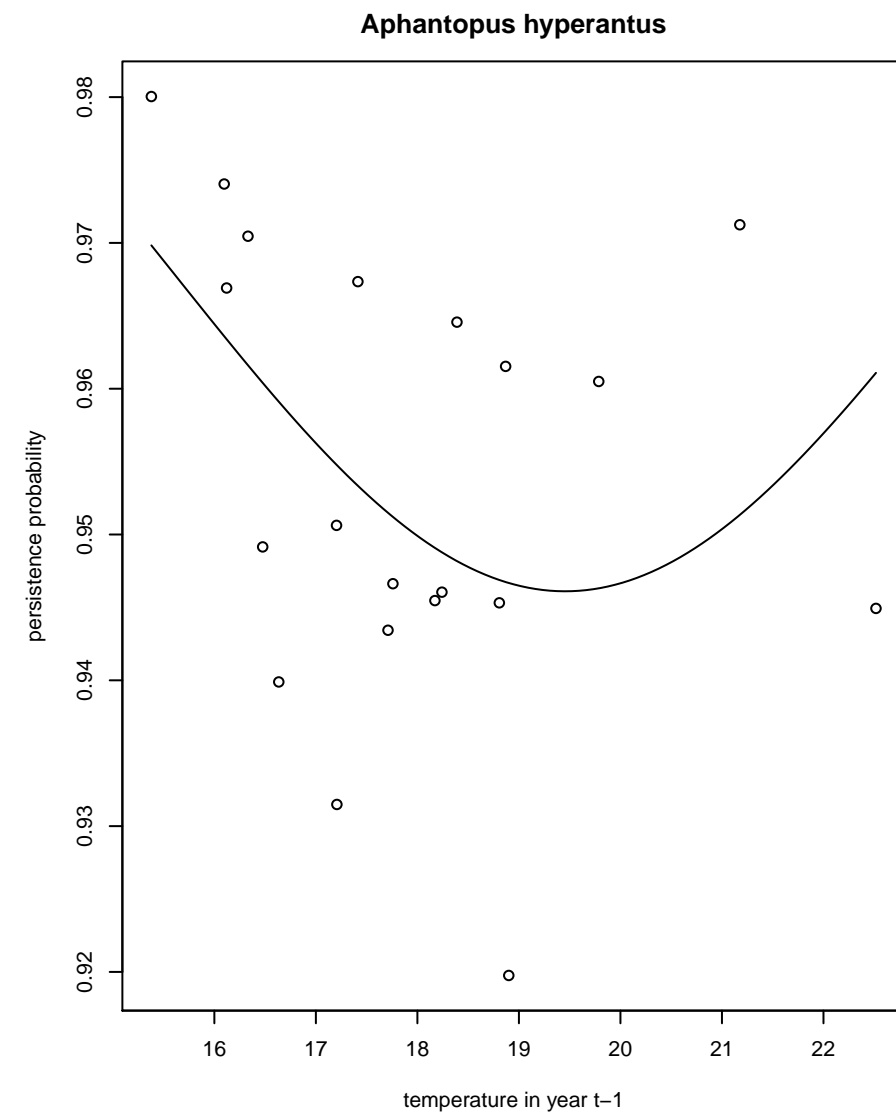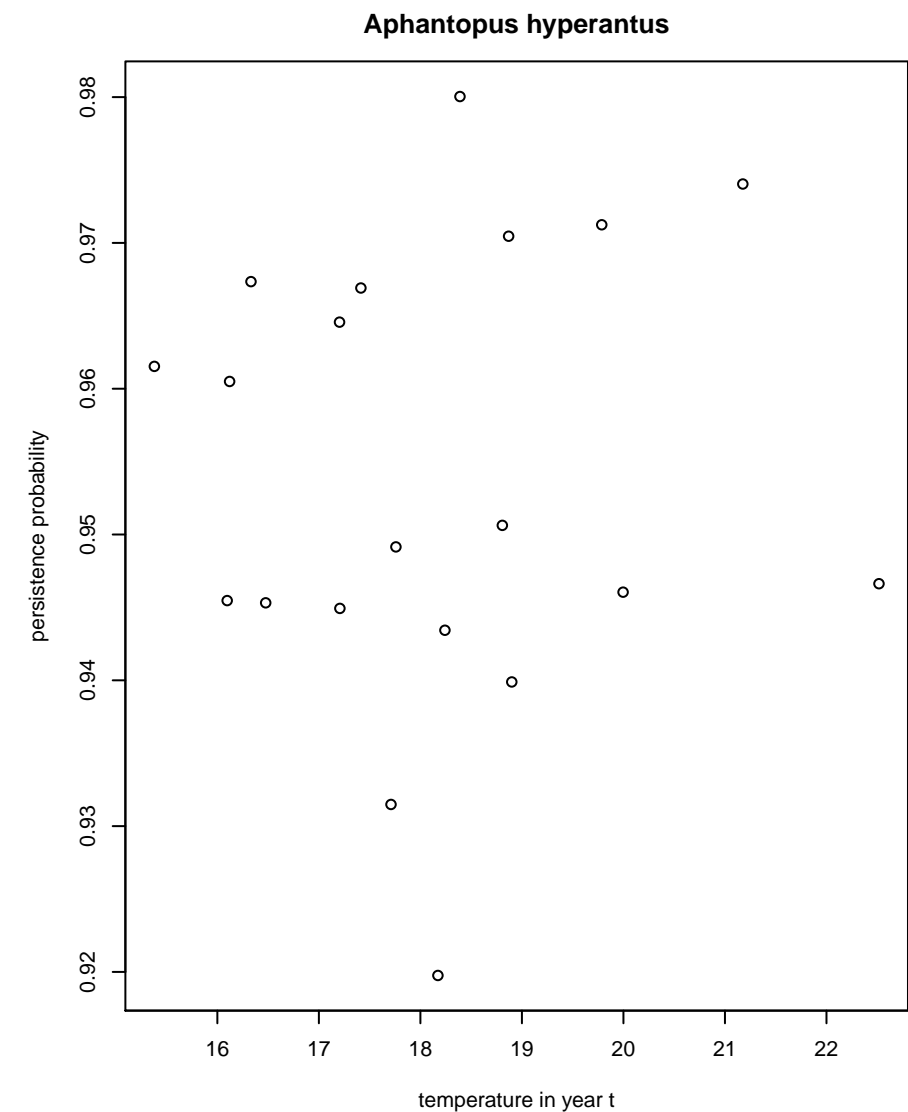

**Coenonympha pamphilus**

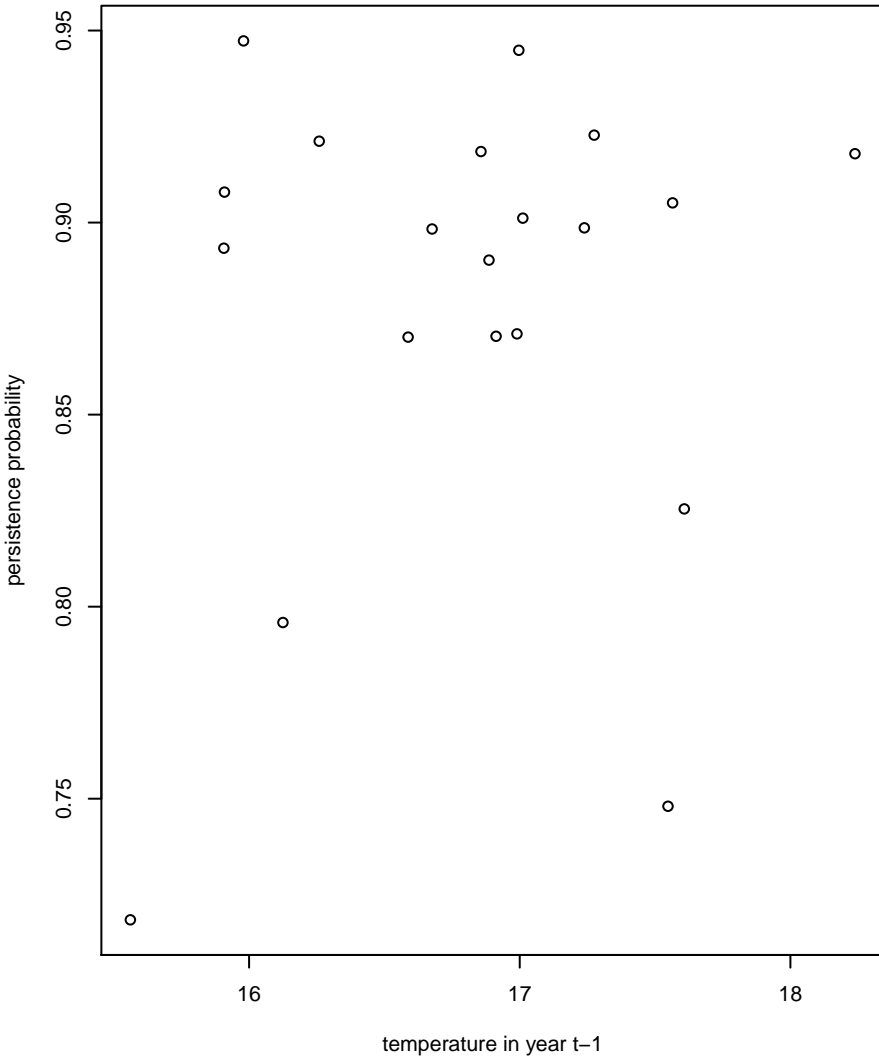

**Coenonympha pamphilus**

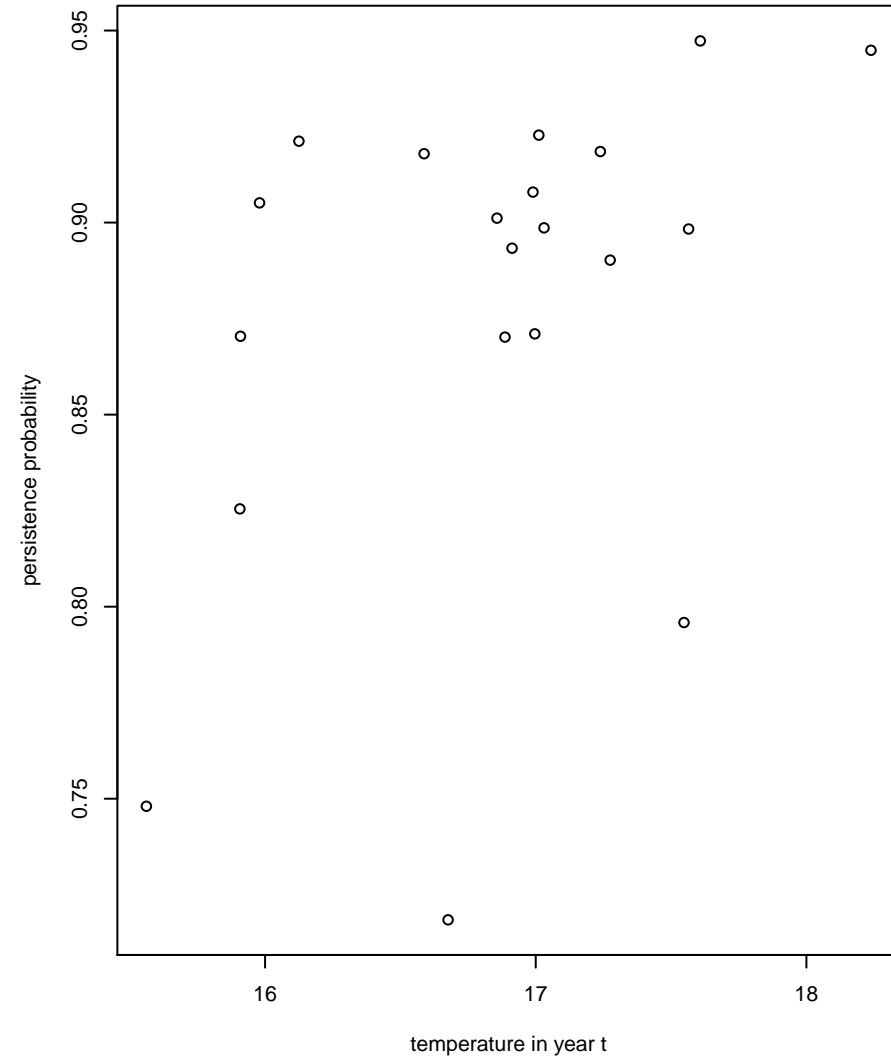

**Anguis fragilis**

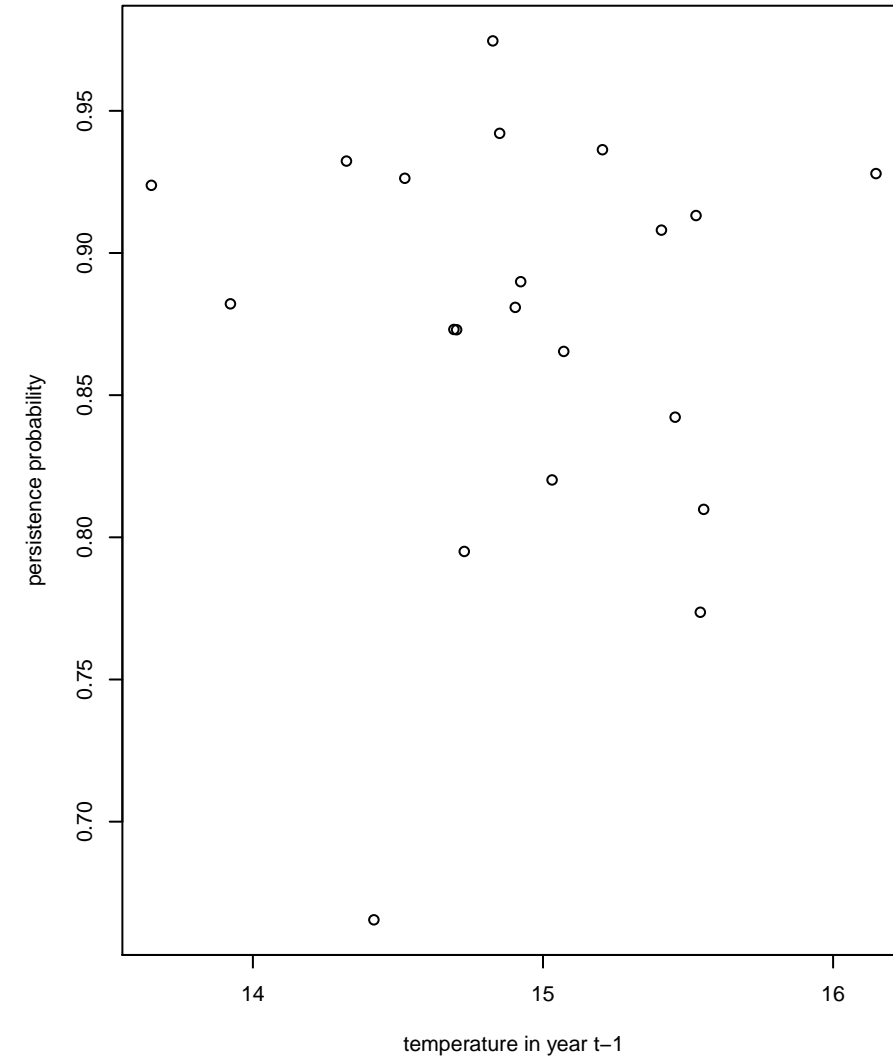

**Anguis fragilis**

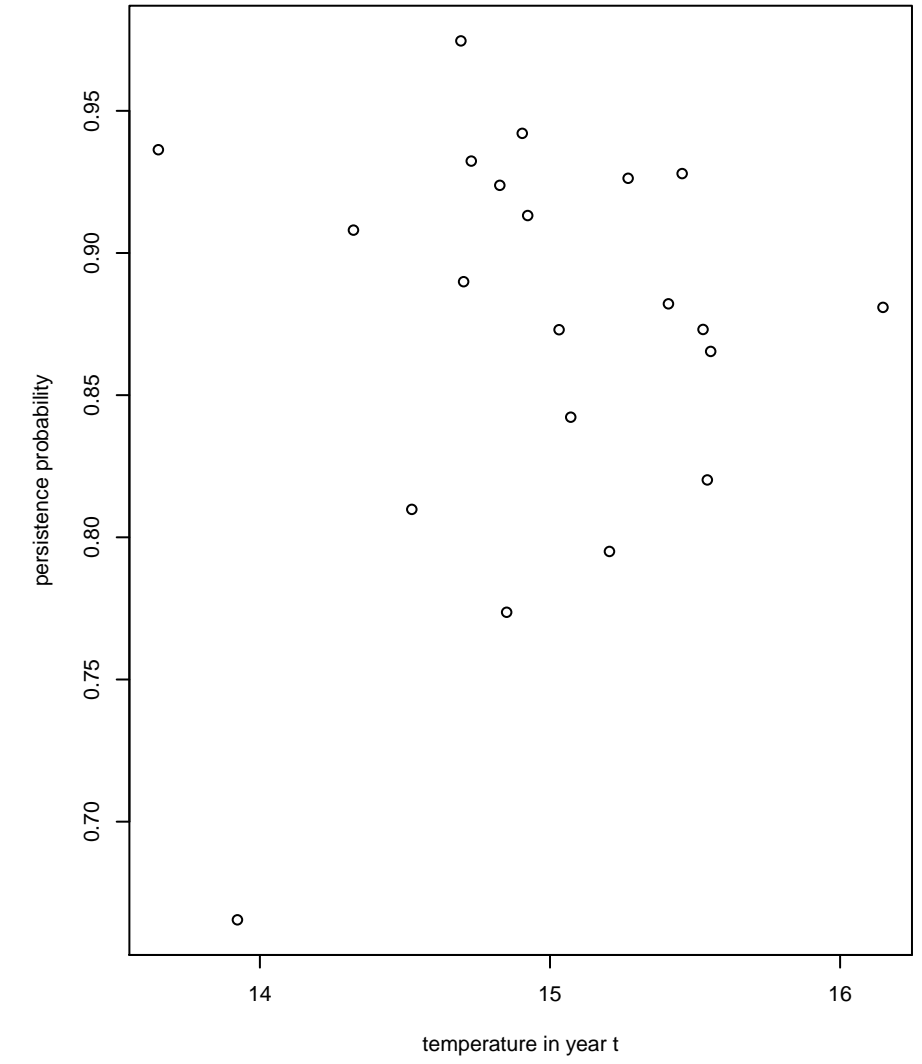

**Lacerta agilis**

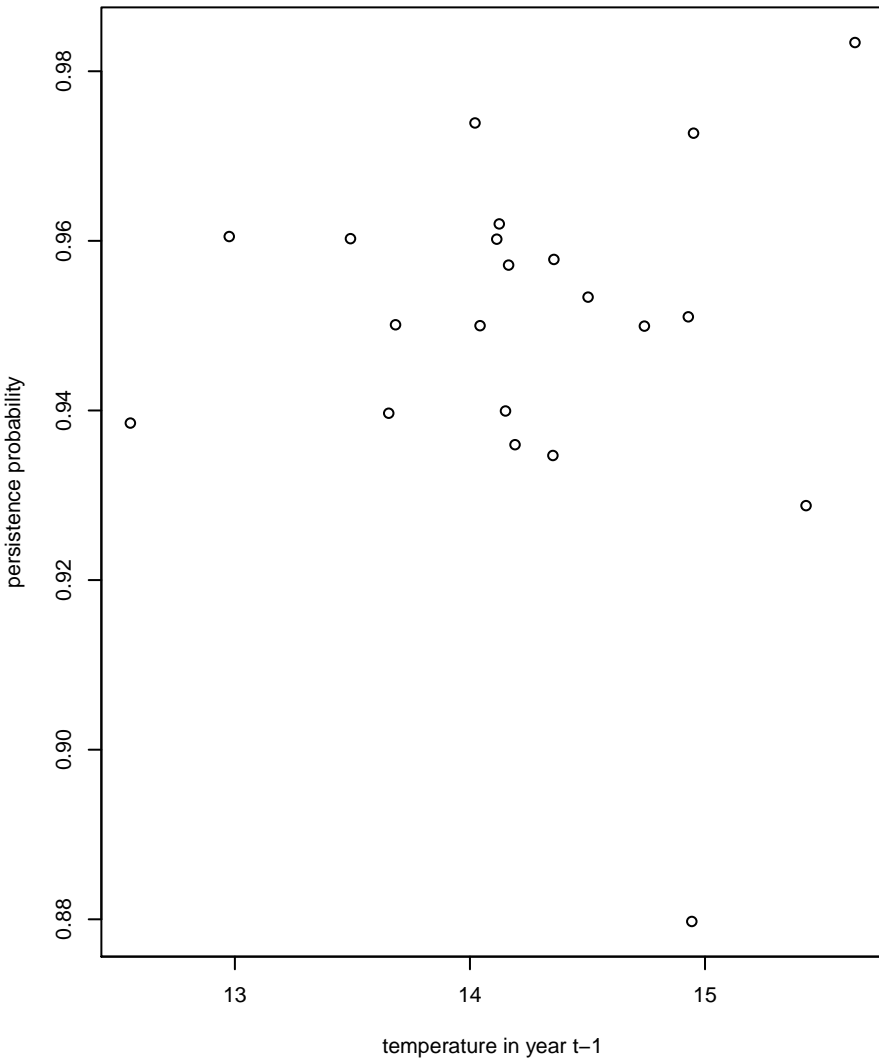

**Lacerta agilis**

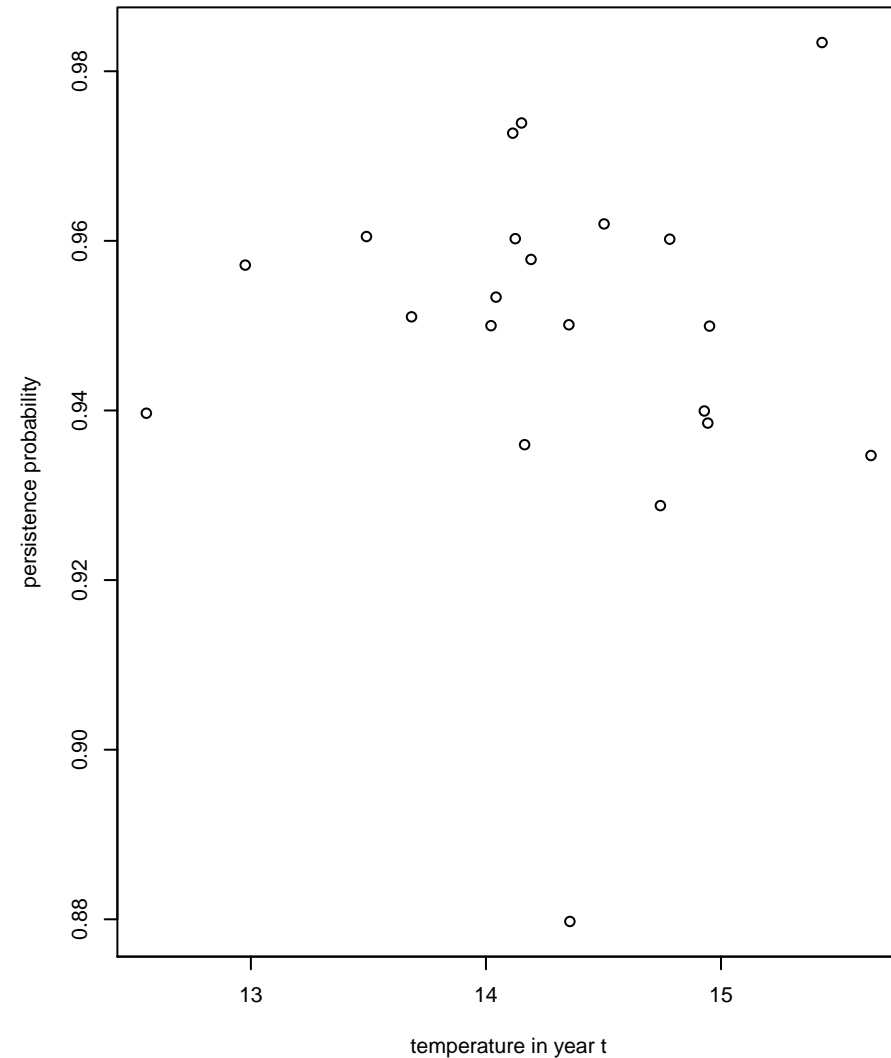

**zootocavivipara**

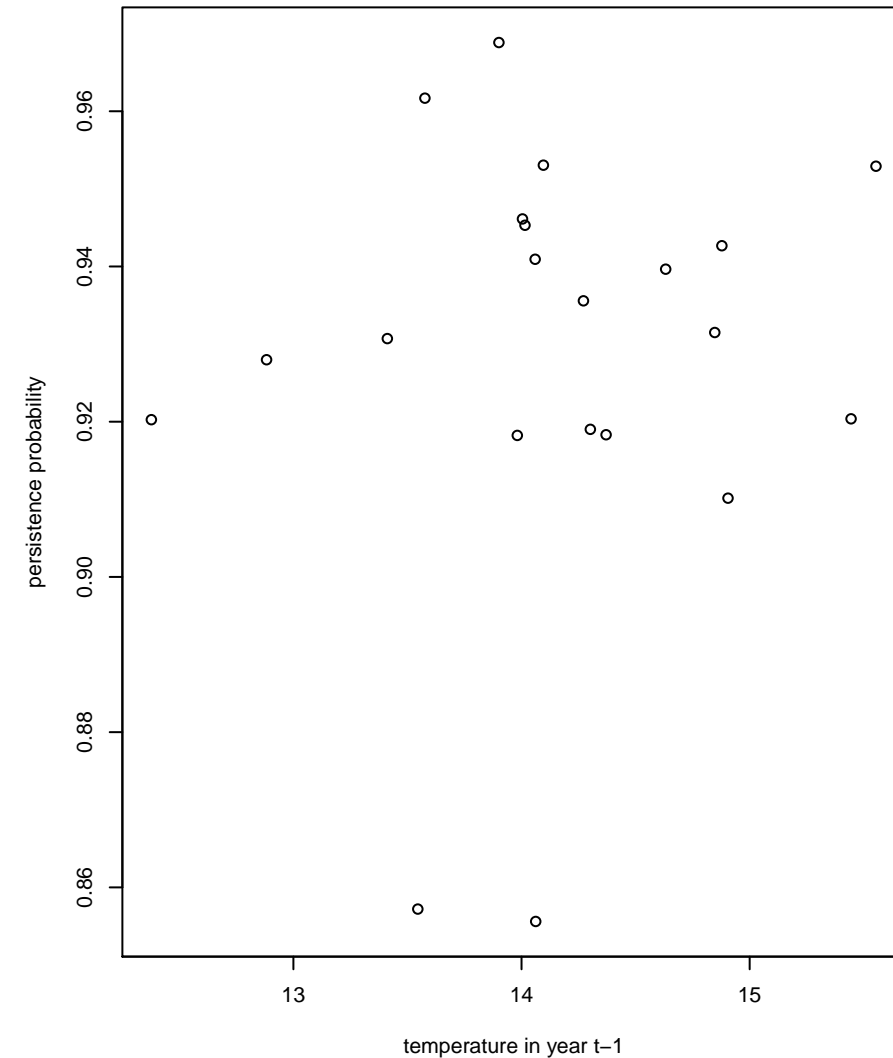

**zootocavivipara**

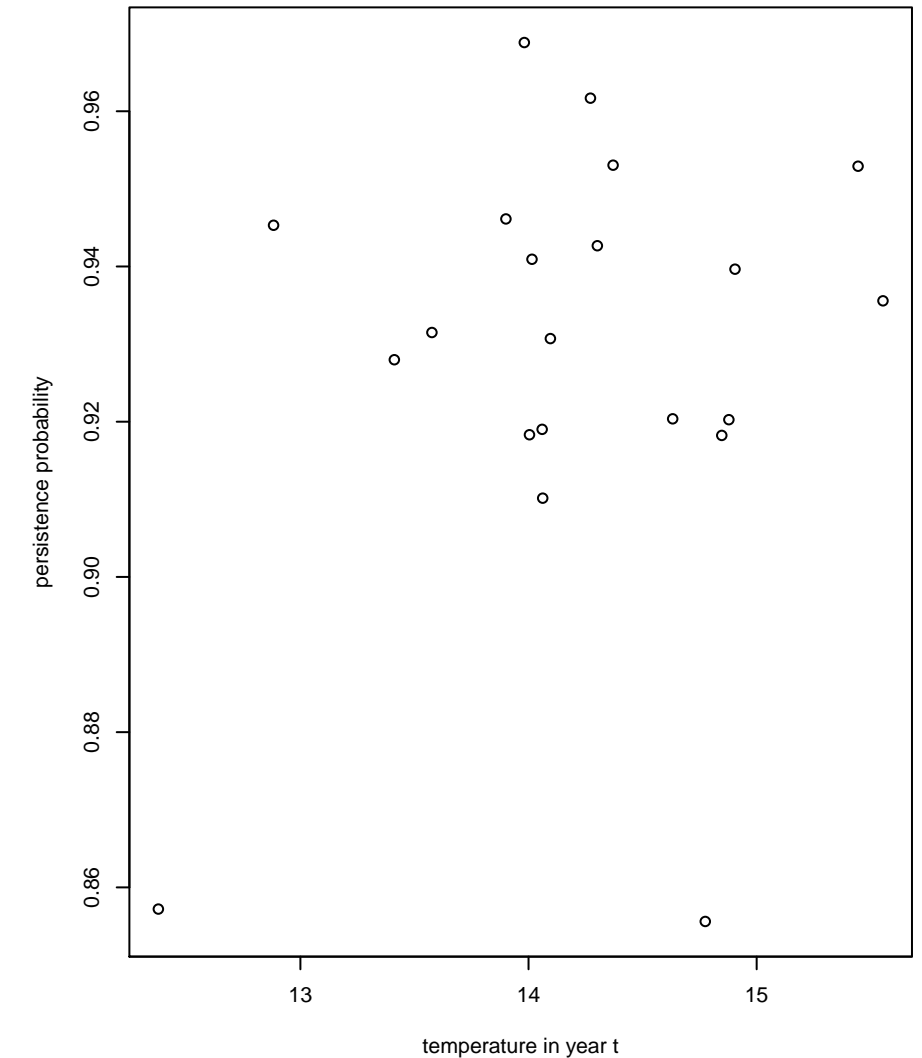

**Coronella austriaca**

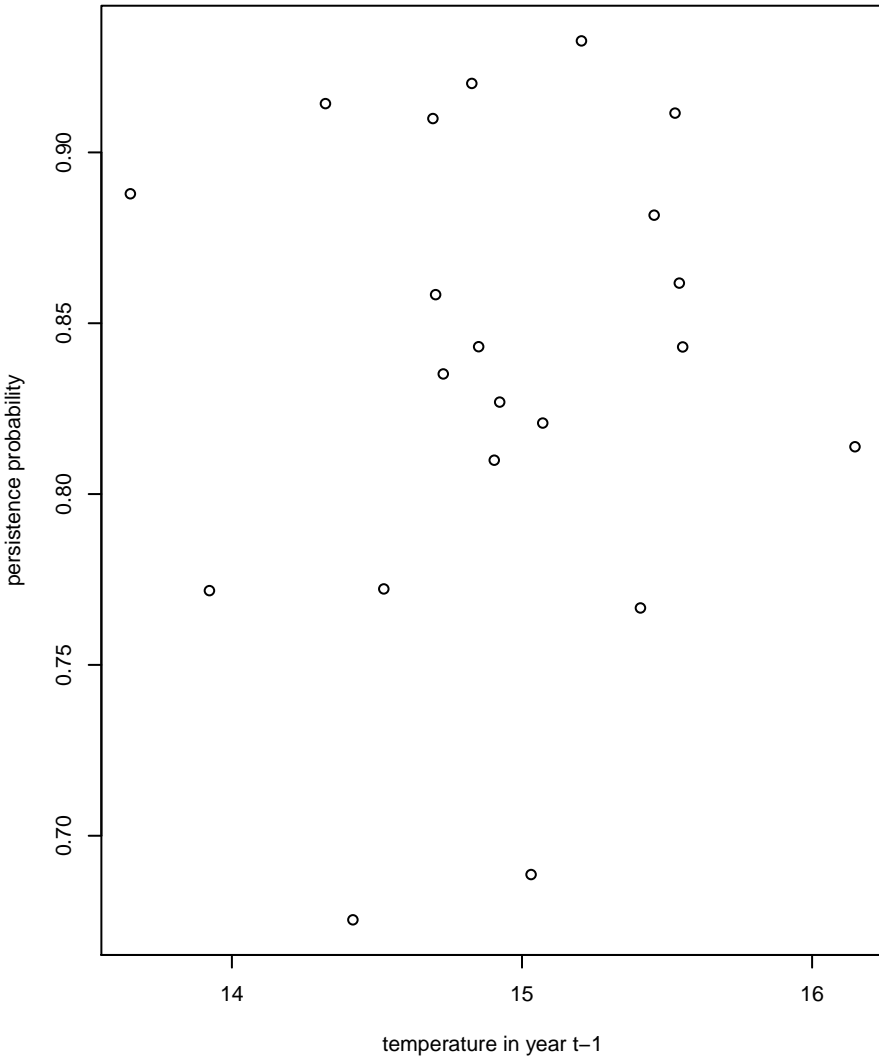

**Coronella austriaca**

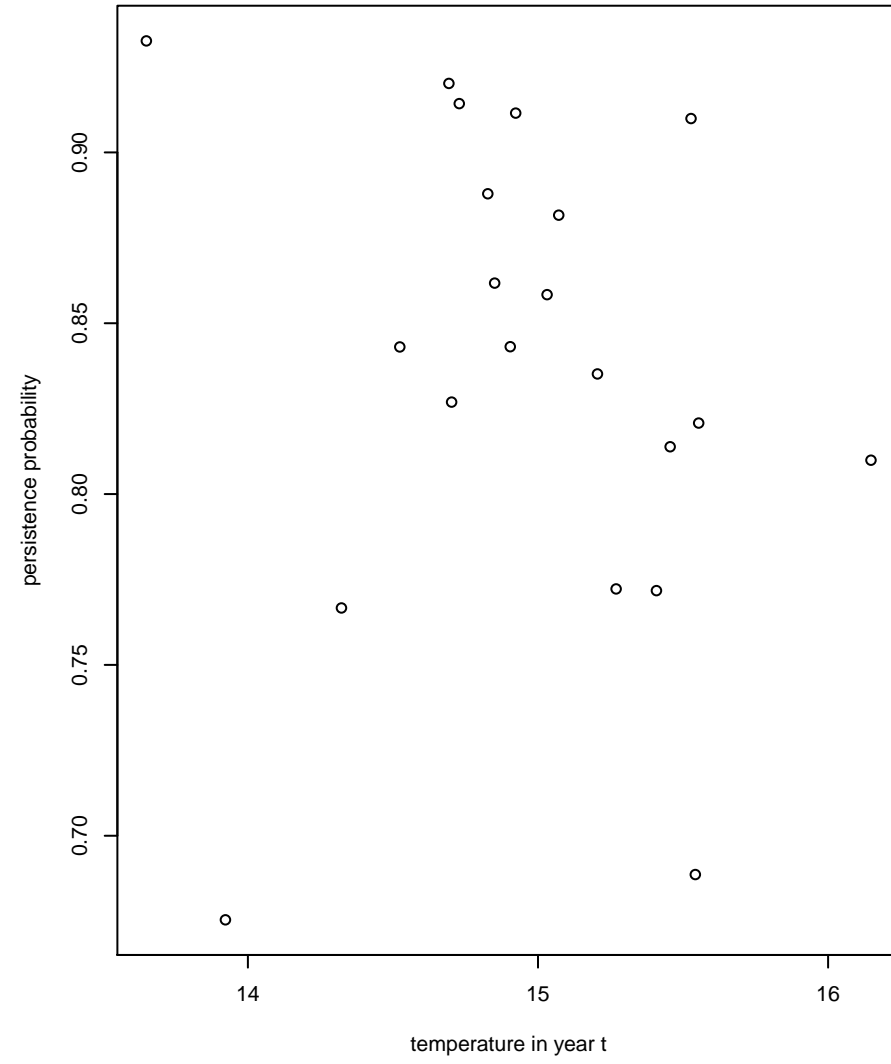

**Natrix natrix**

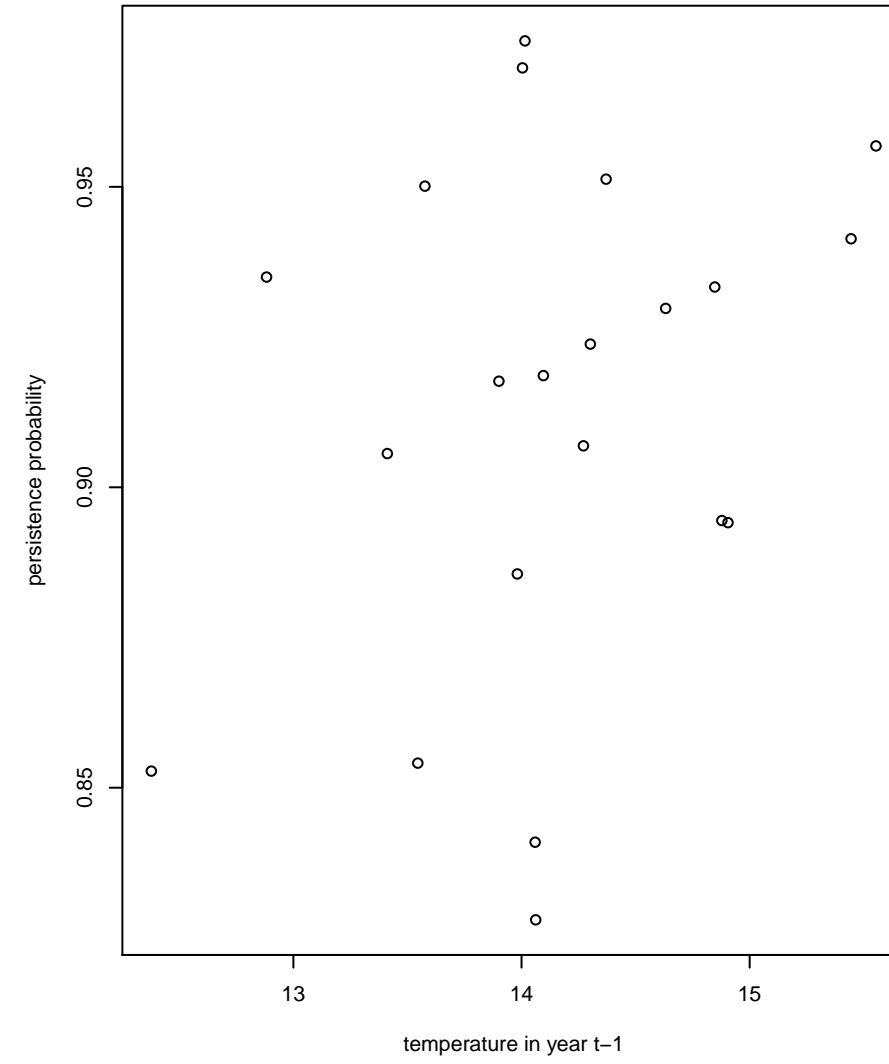

**Natrix natrix**

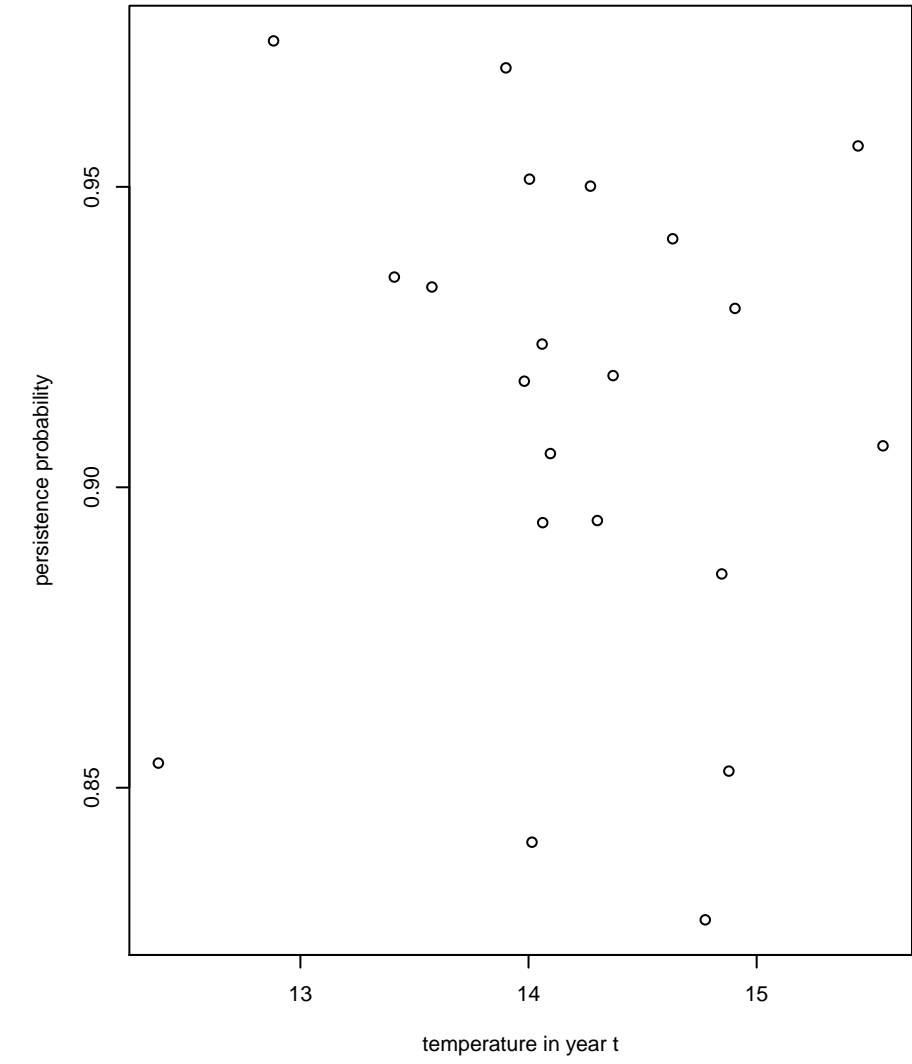

**Vipera berus**

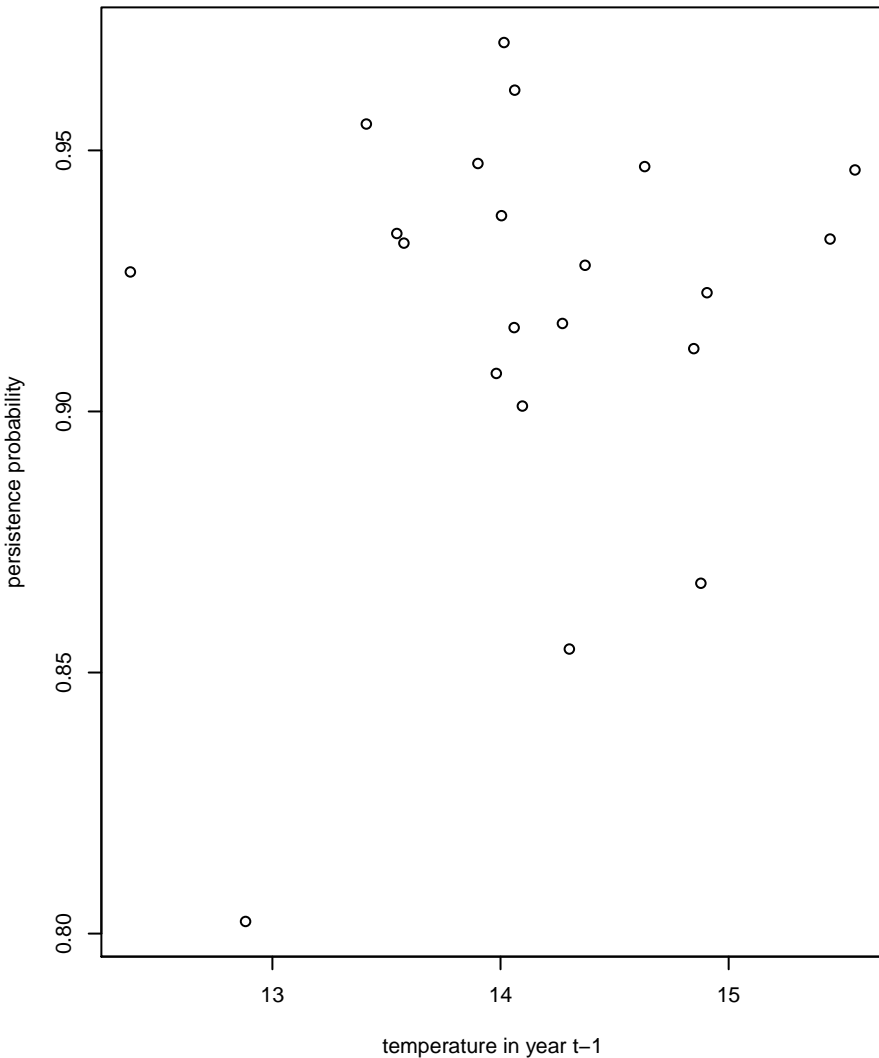

**Vipera berus**

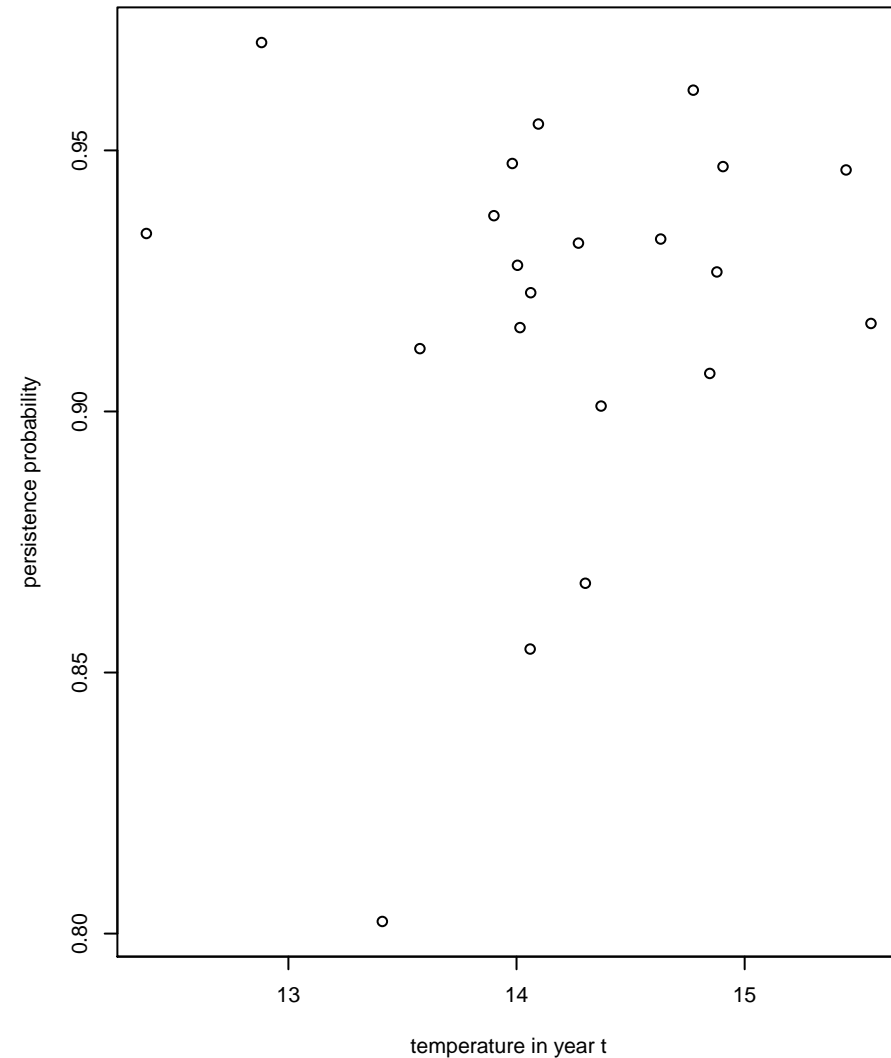

**Chorthippus albomarginatus**

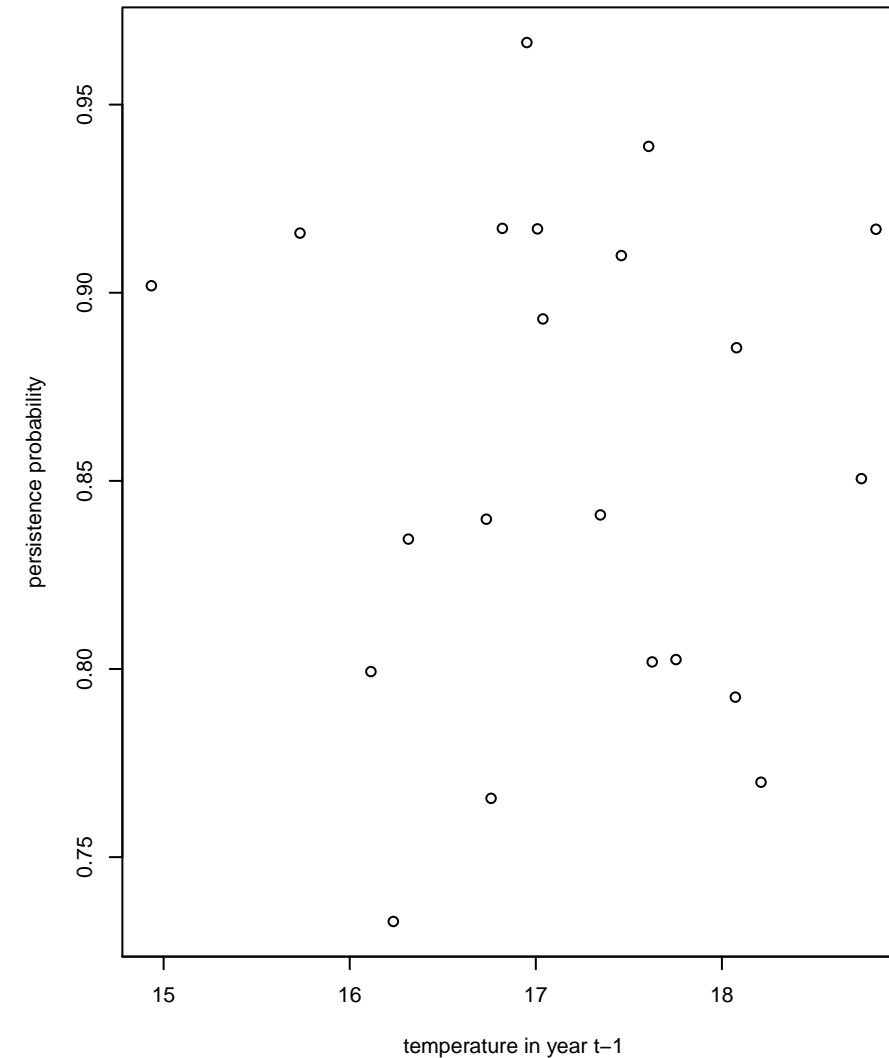

**Chorthippus albomarginatus**

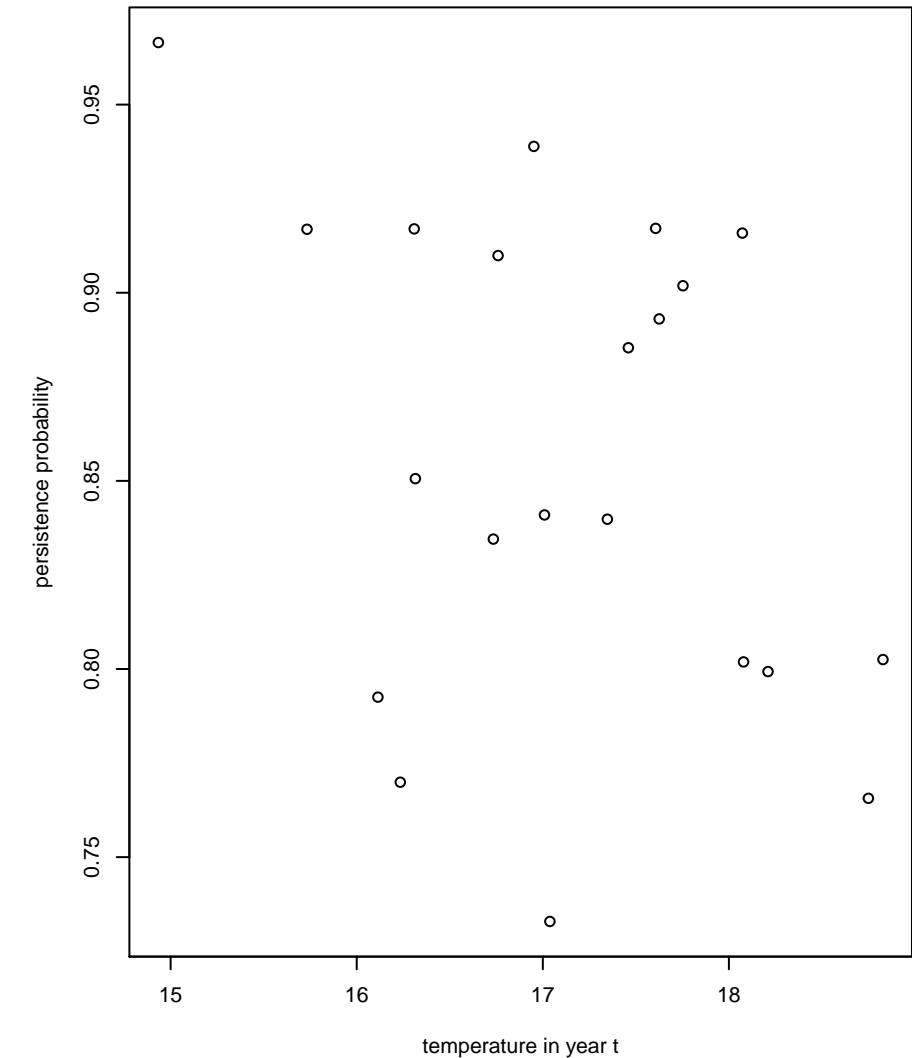

**Chorthippus biguttulus**

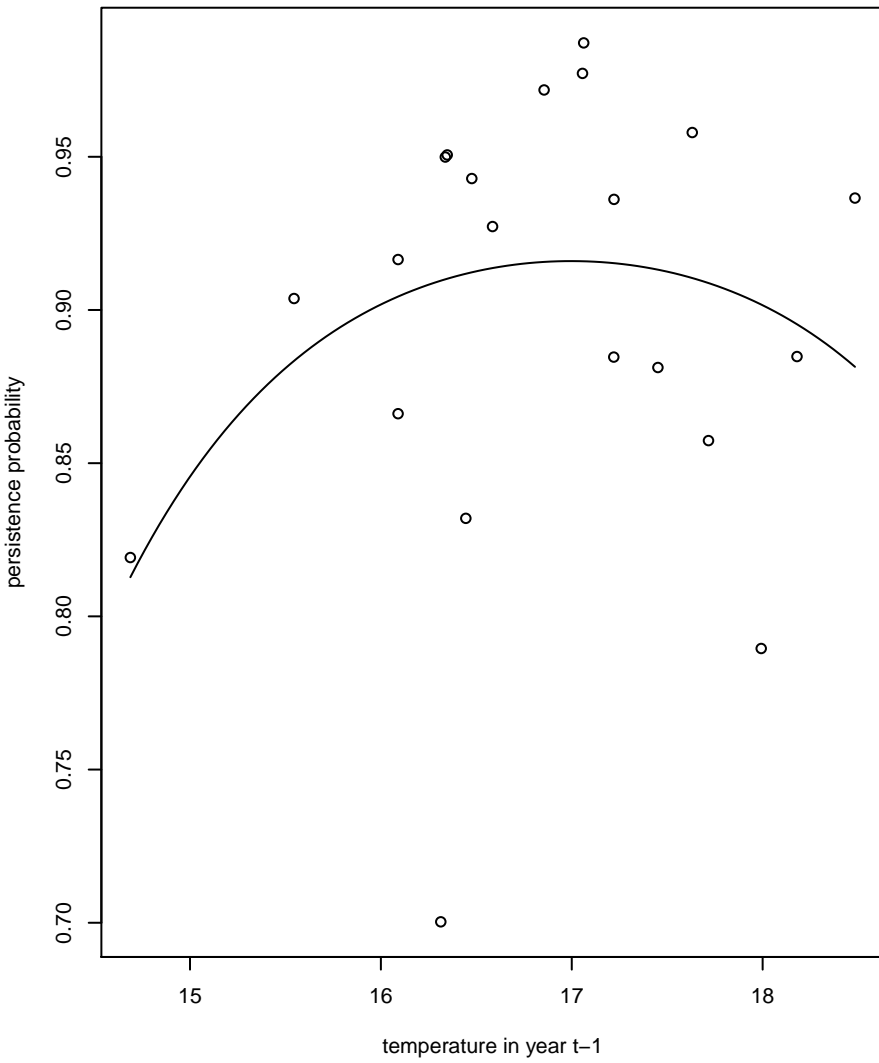

**Chorthippus biguttulus**

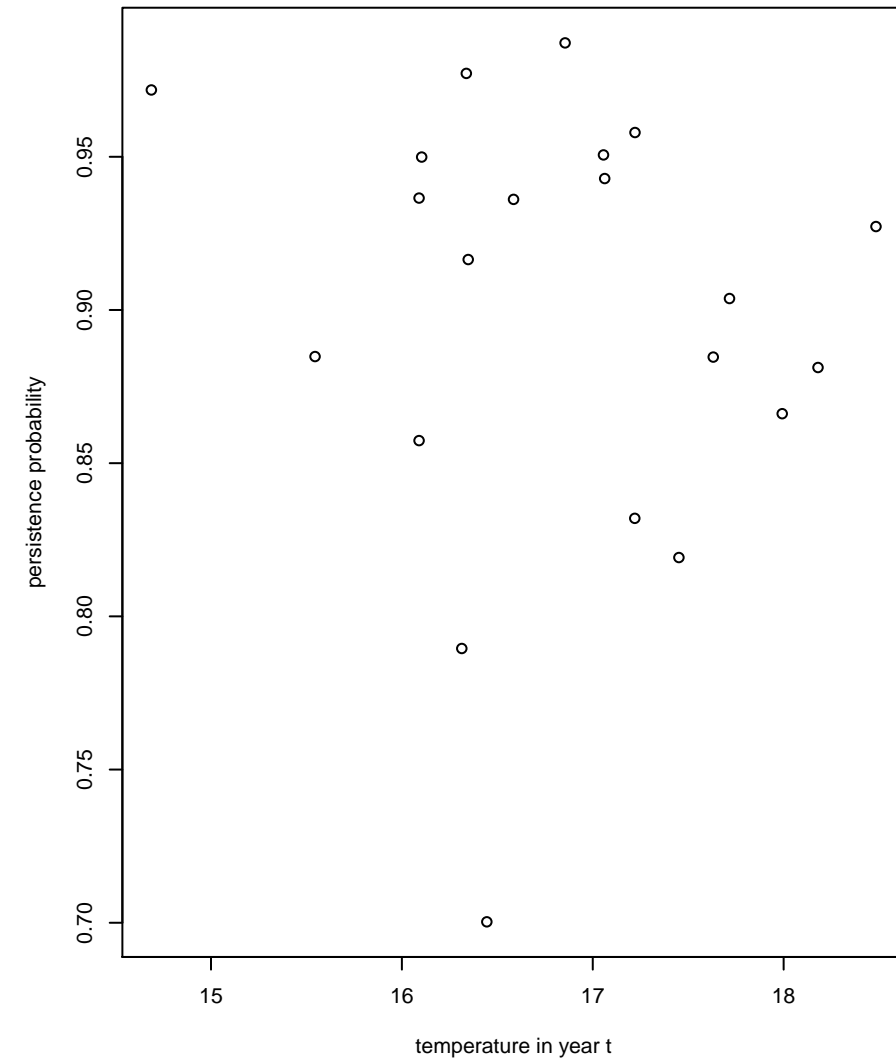

**Chorthippus brunneus**

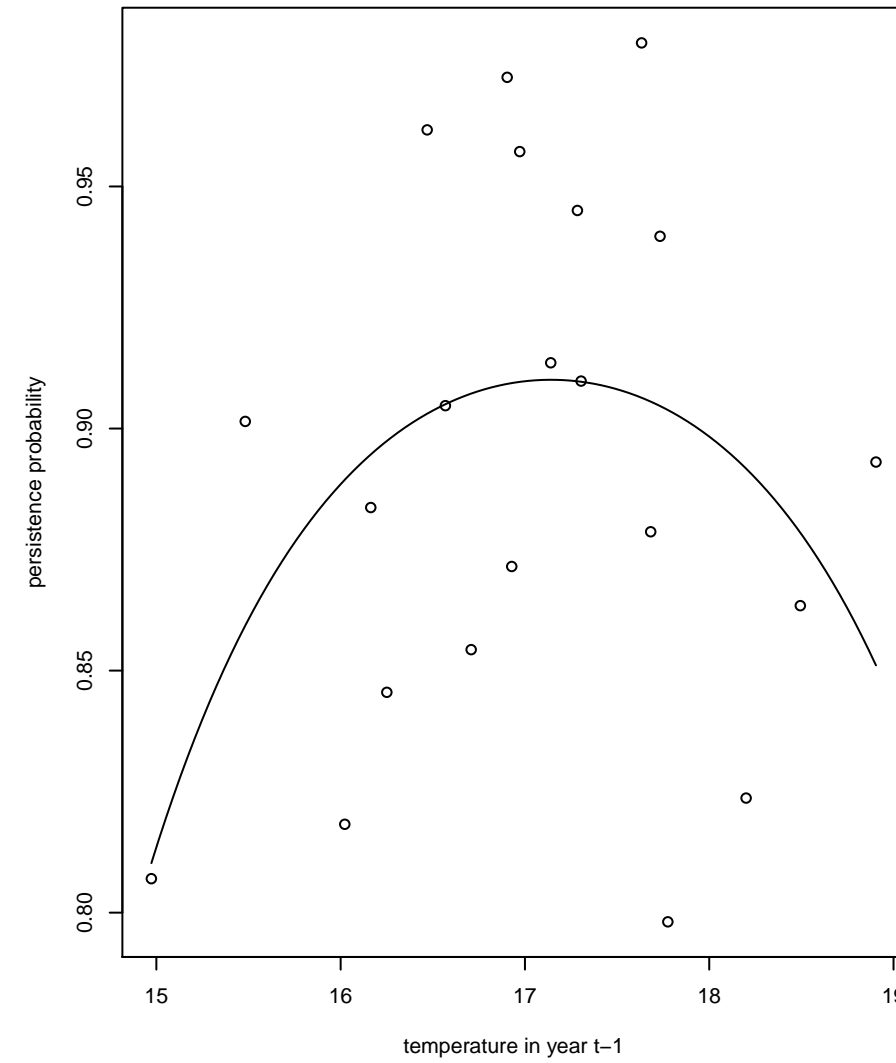

**Chorthippus brunneus**

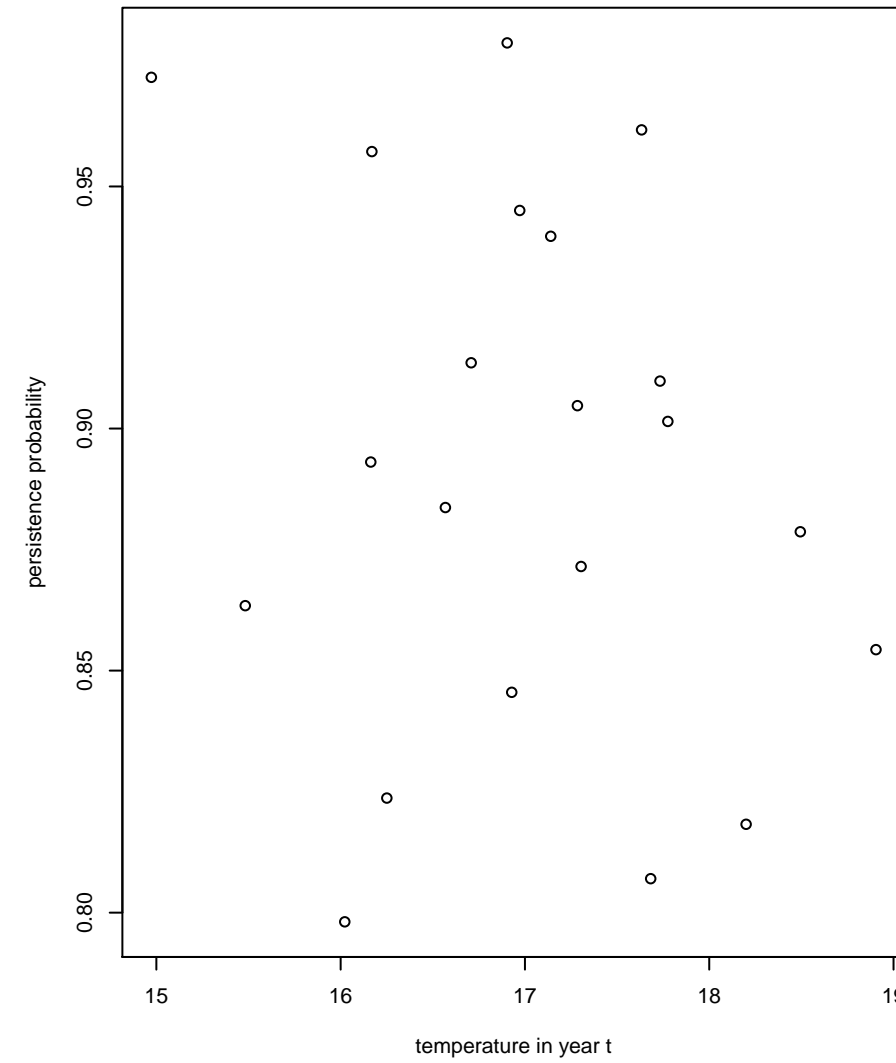

**Chorthippus mollis**

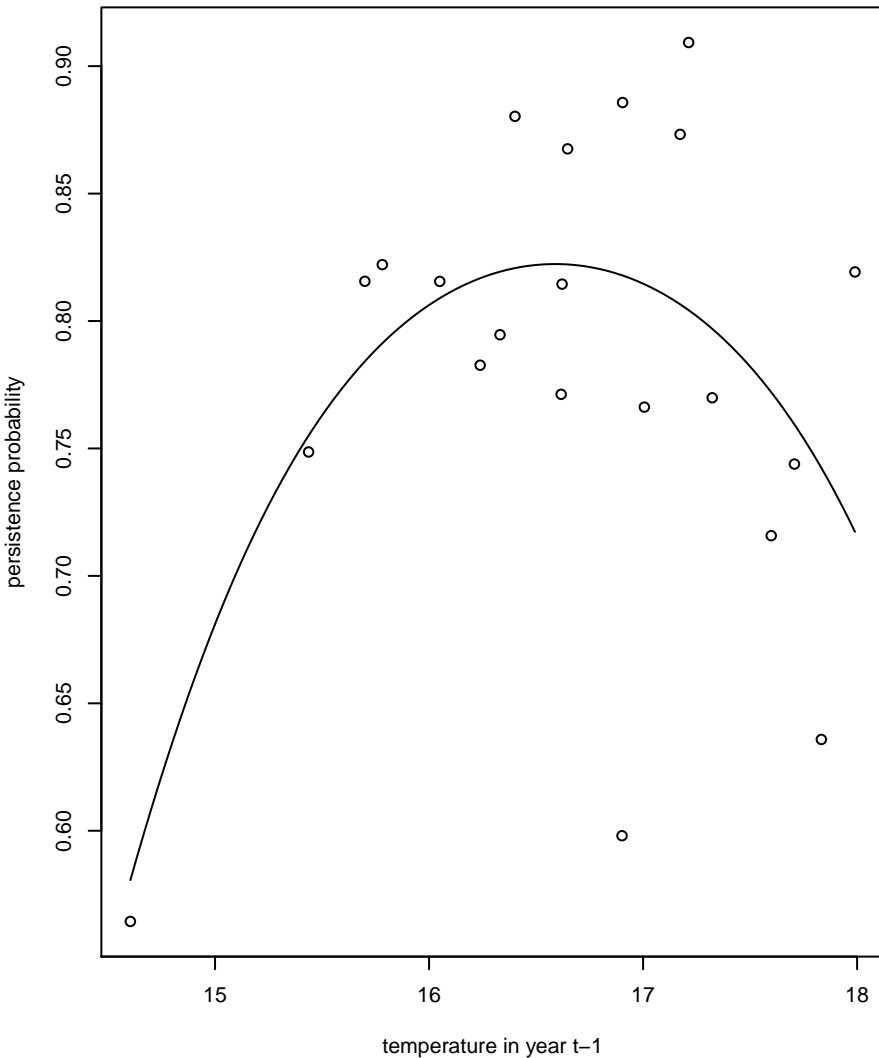

**Chorthippus mollis**

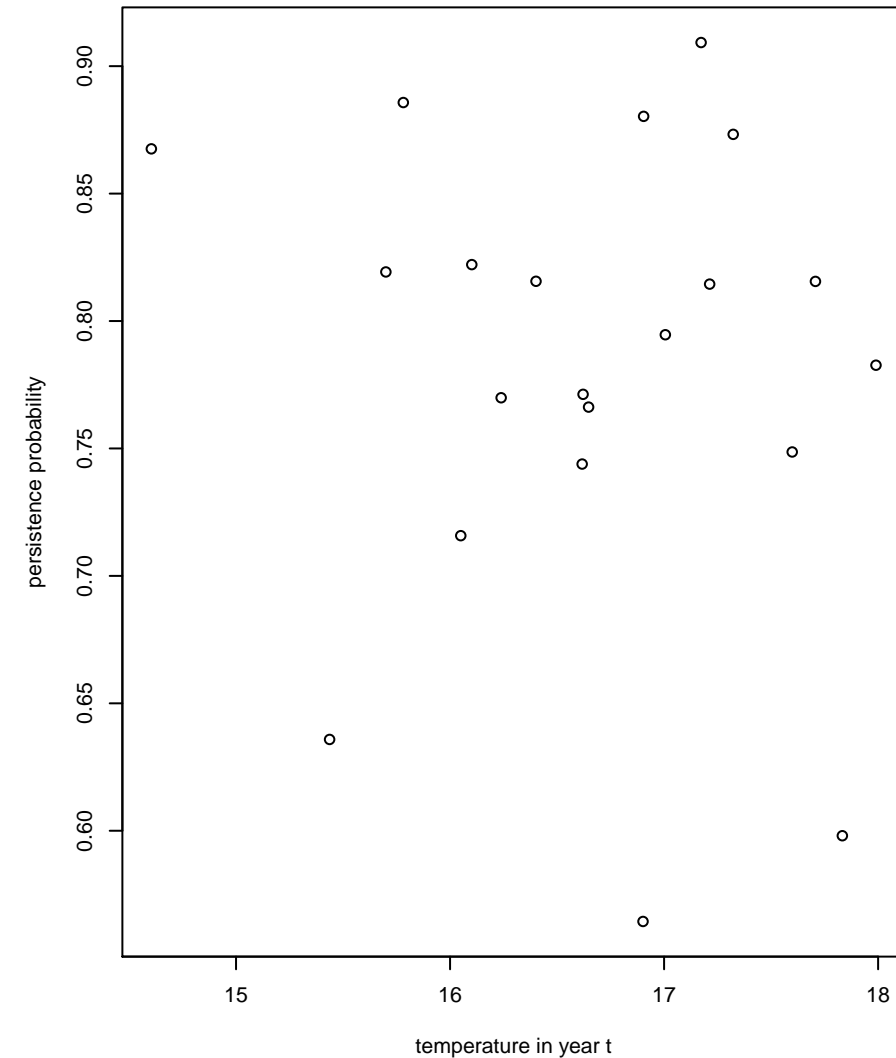

**Chorthippus parallelus**

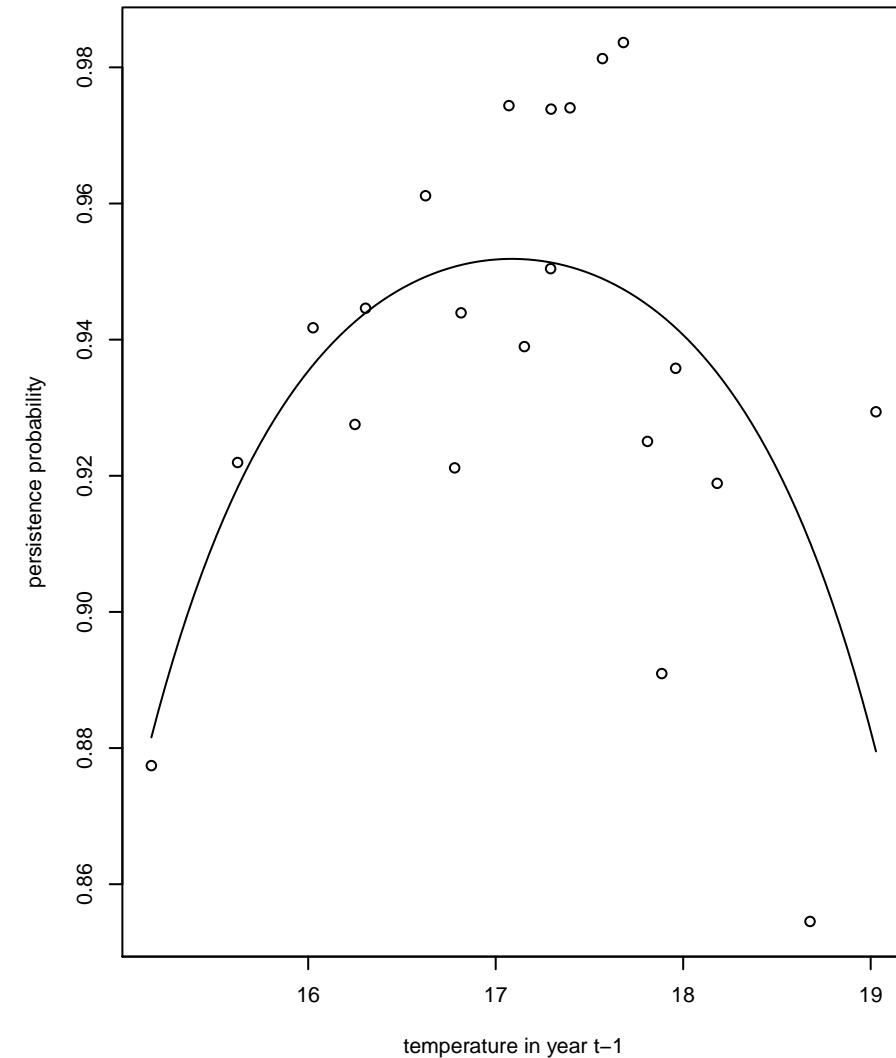

**Chorthippus parallelus**

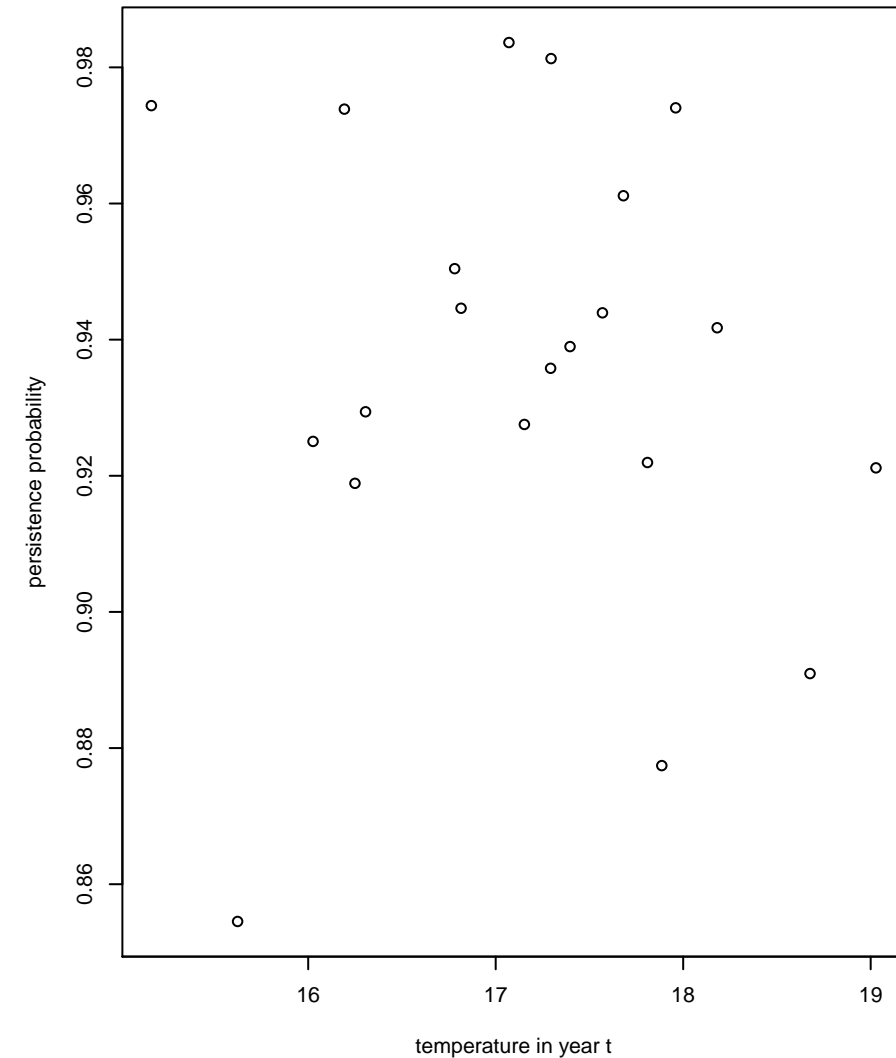

**Chrysochraon dispar**

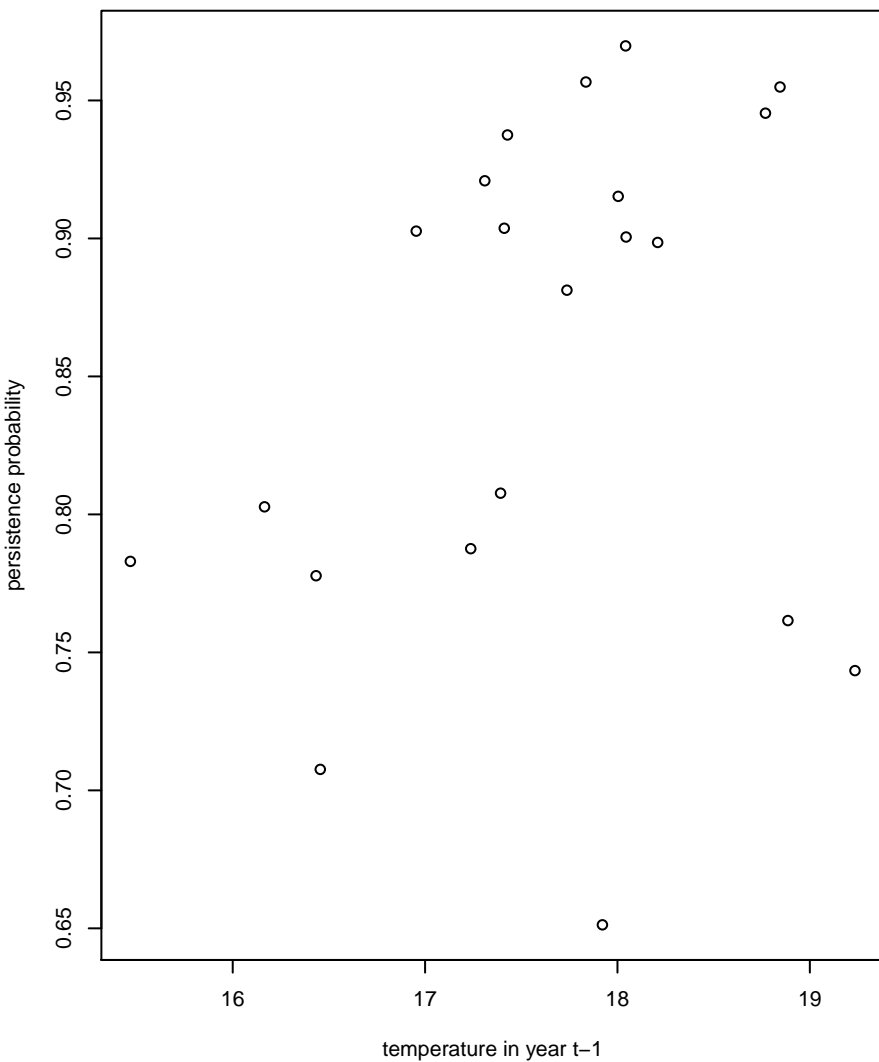

**Chrysochraon dispar**

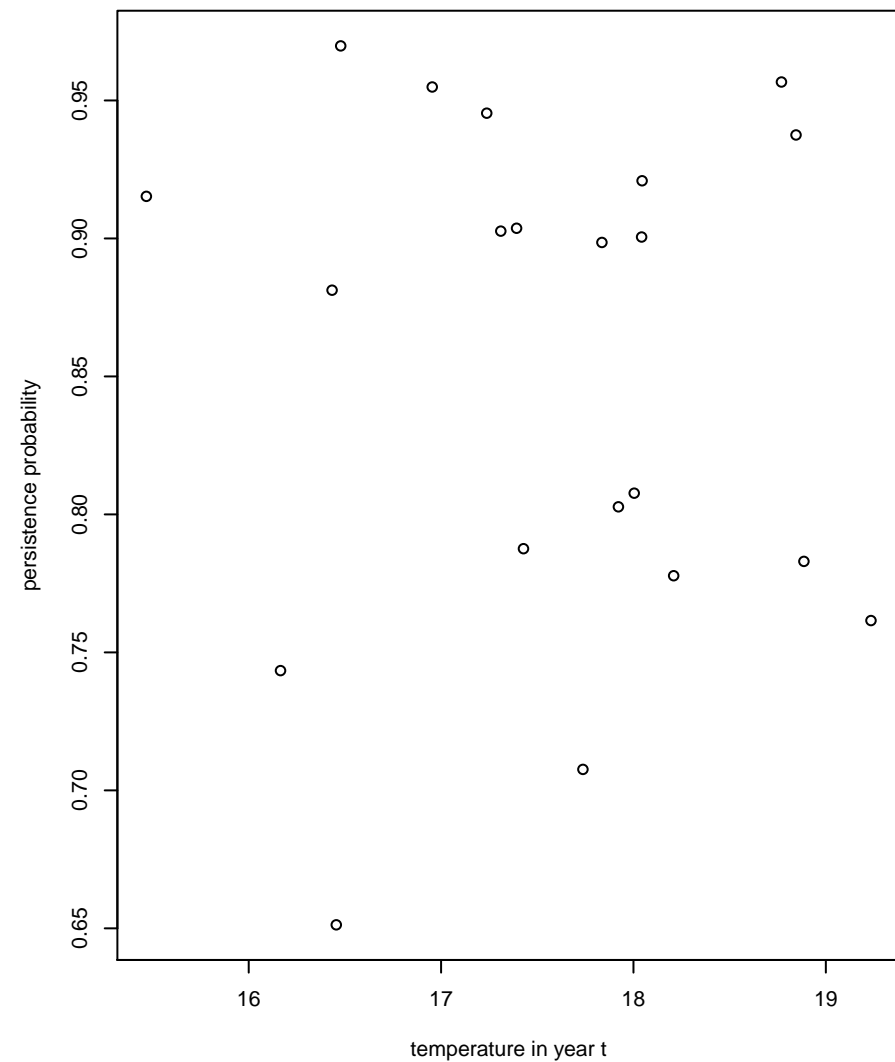

**Conocephalus dorsalis**

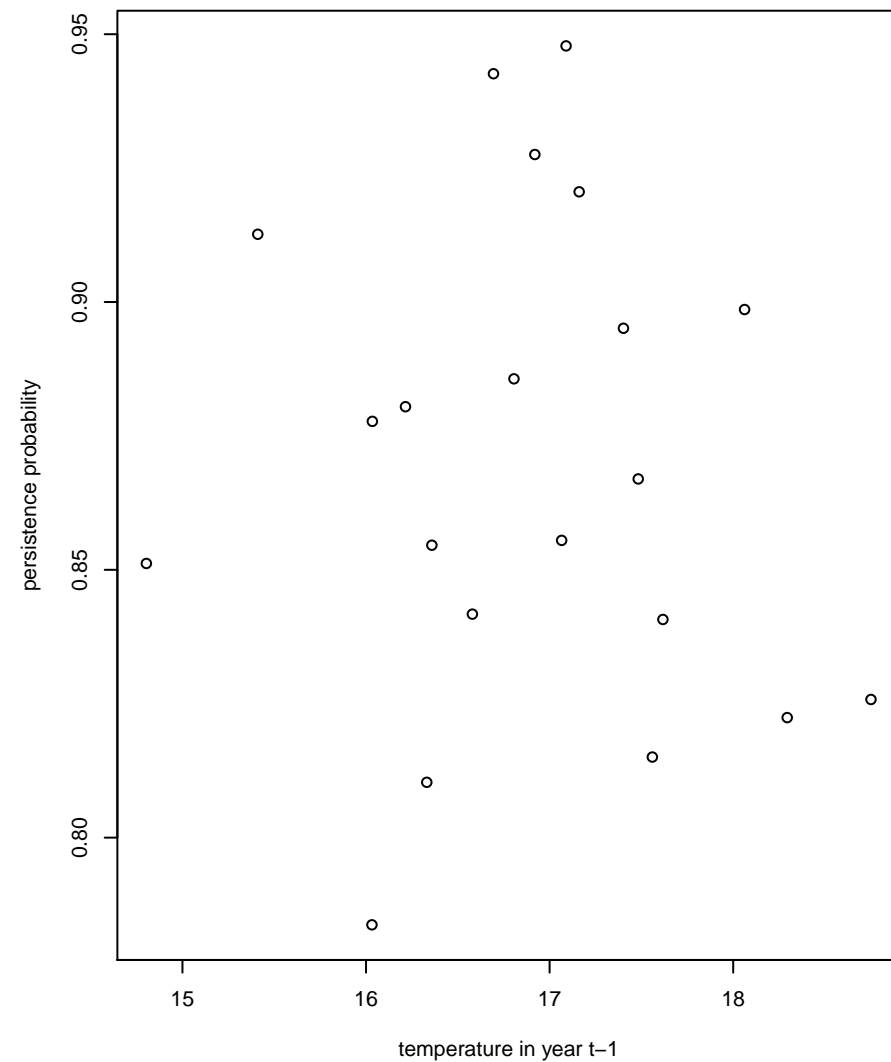

**Conocephalus dorsalis**

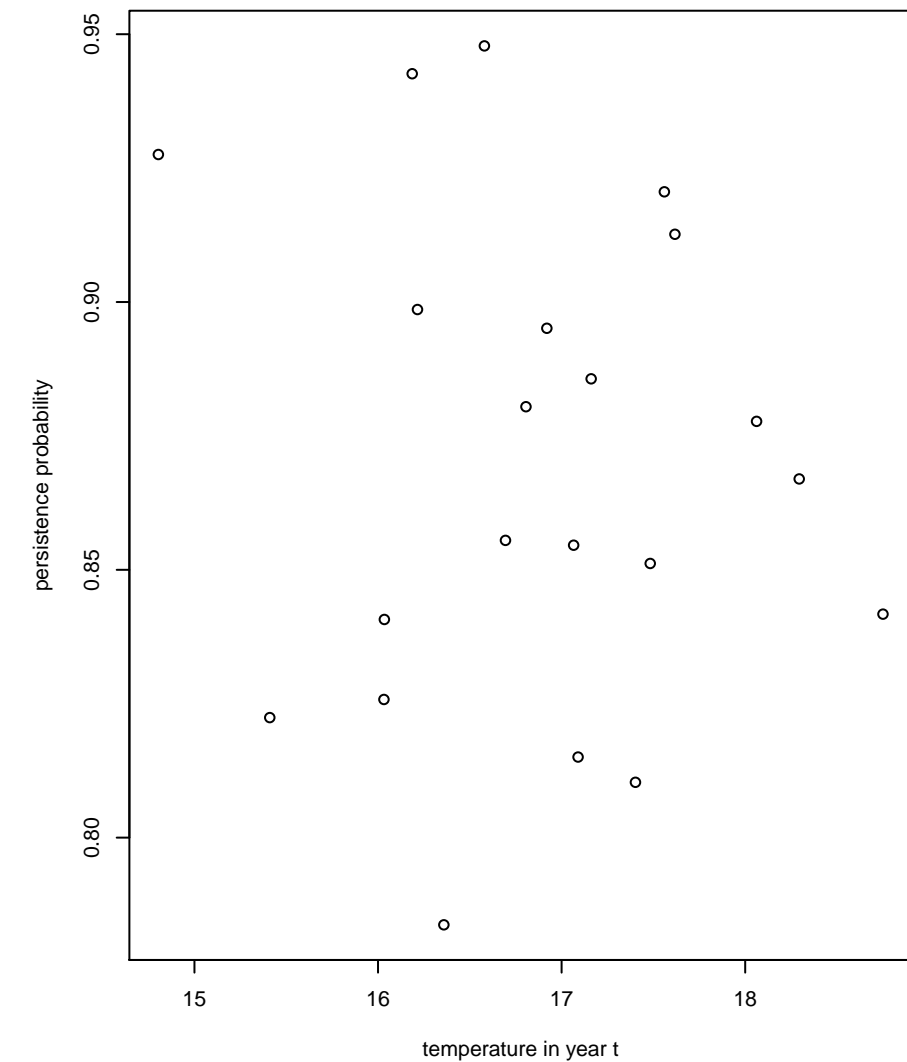

**Leptophyes punctatissima**

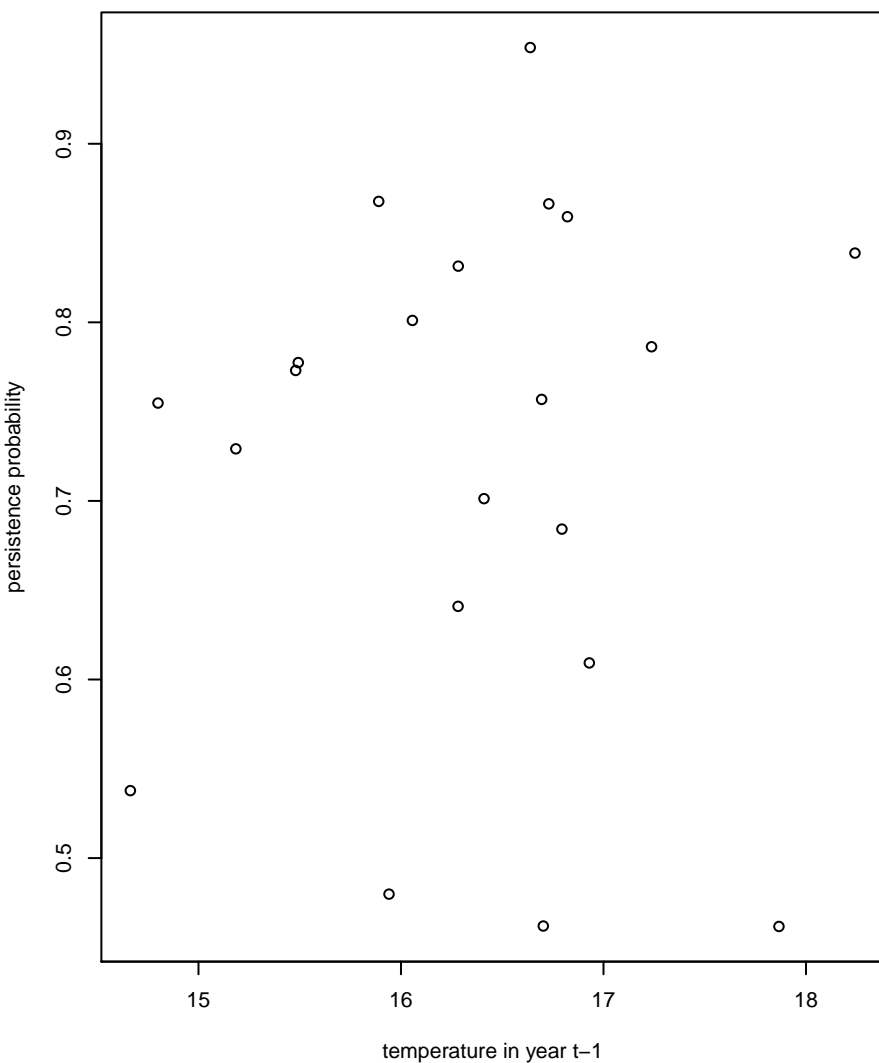

**Leptophyes punctatissima**

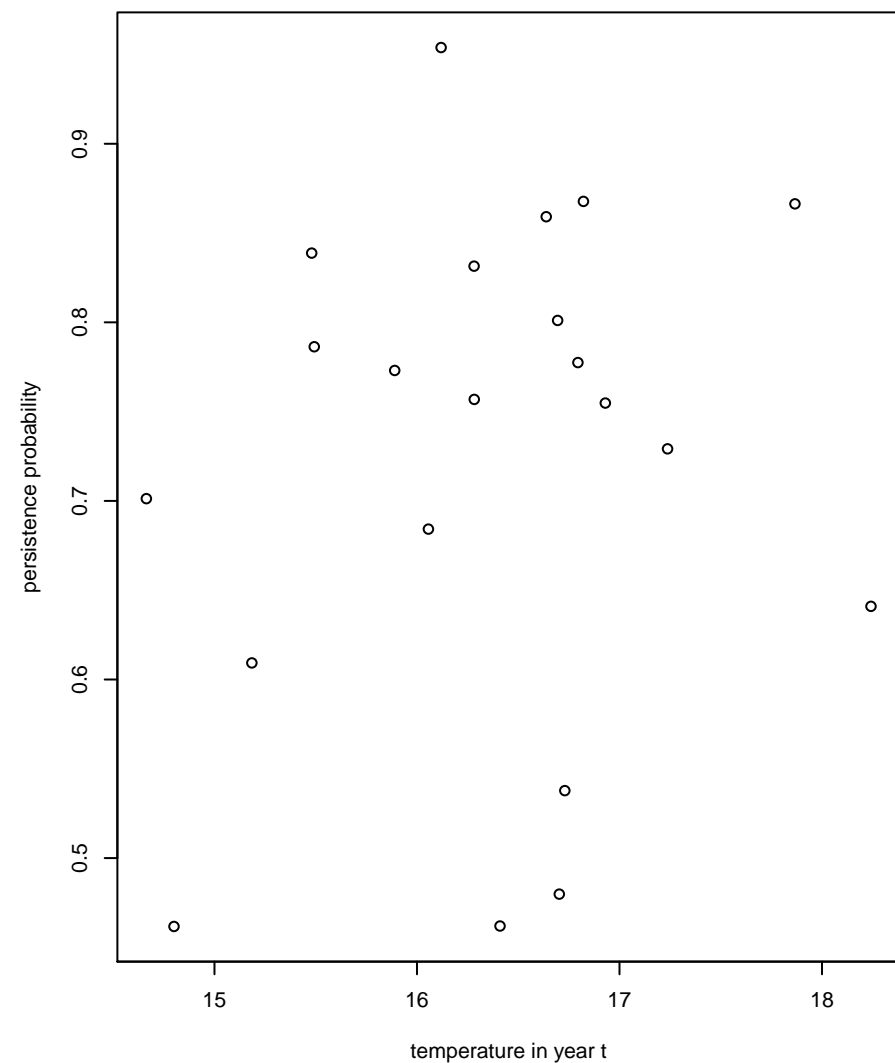

**Meconema meridionale**

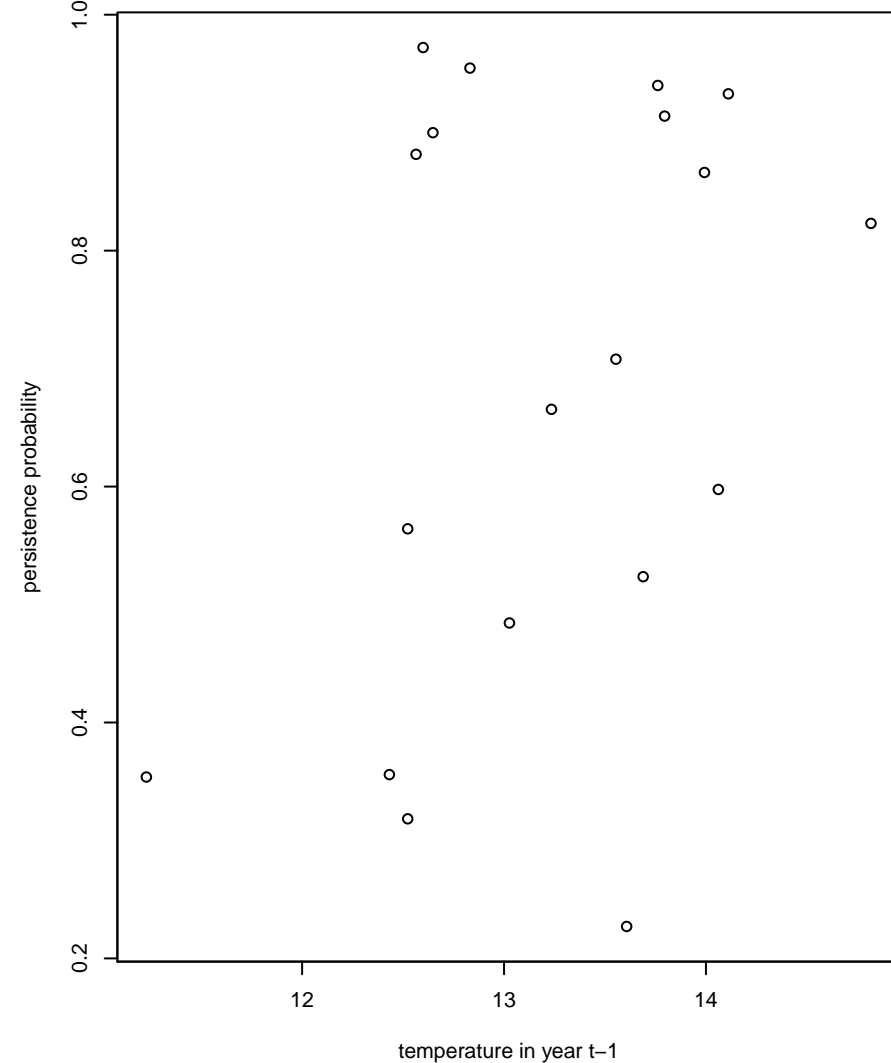

**Meconema meridionale**

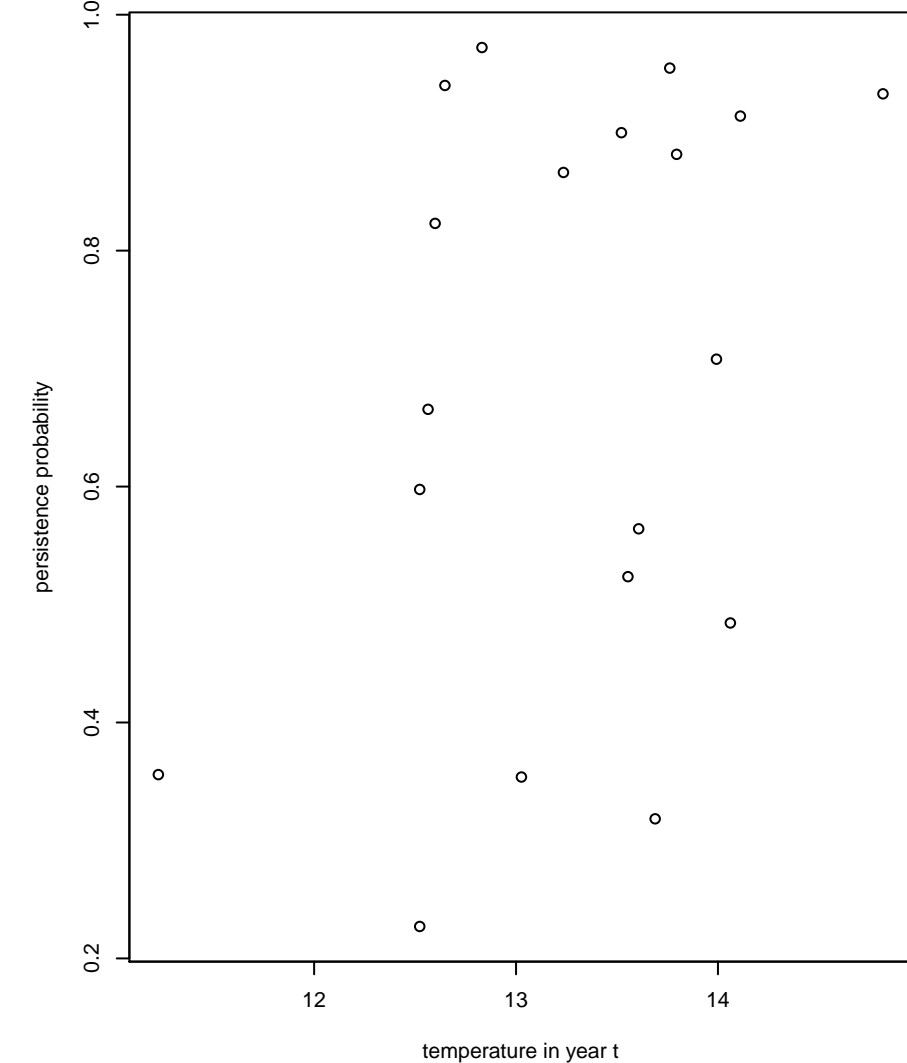

**Meconema thalassinum**

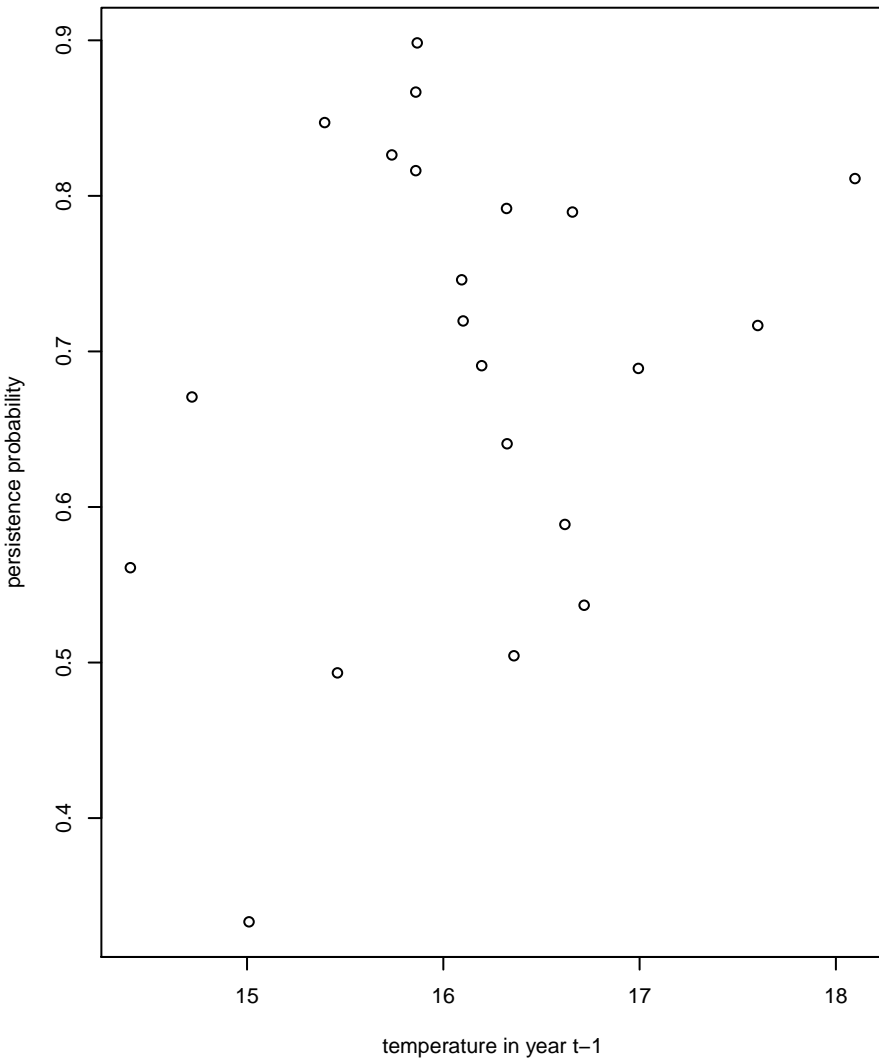

**Meconema thalassinum**

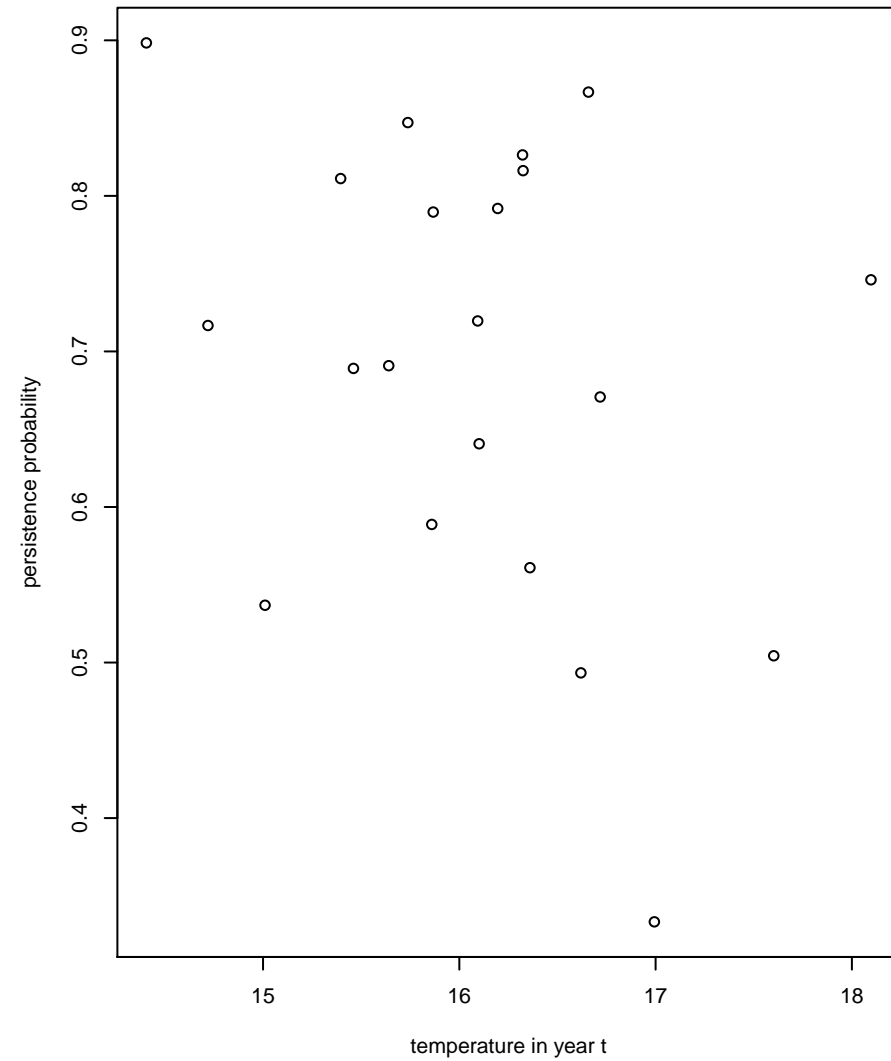

**Metrioptera brachyptera**

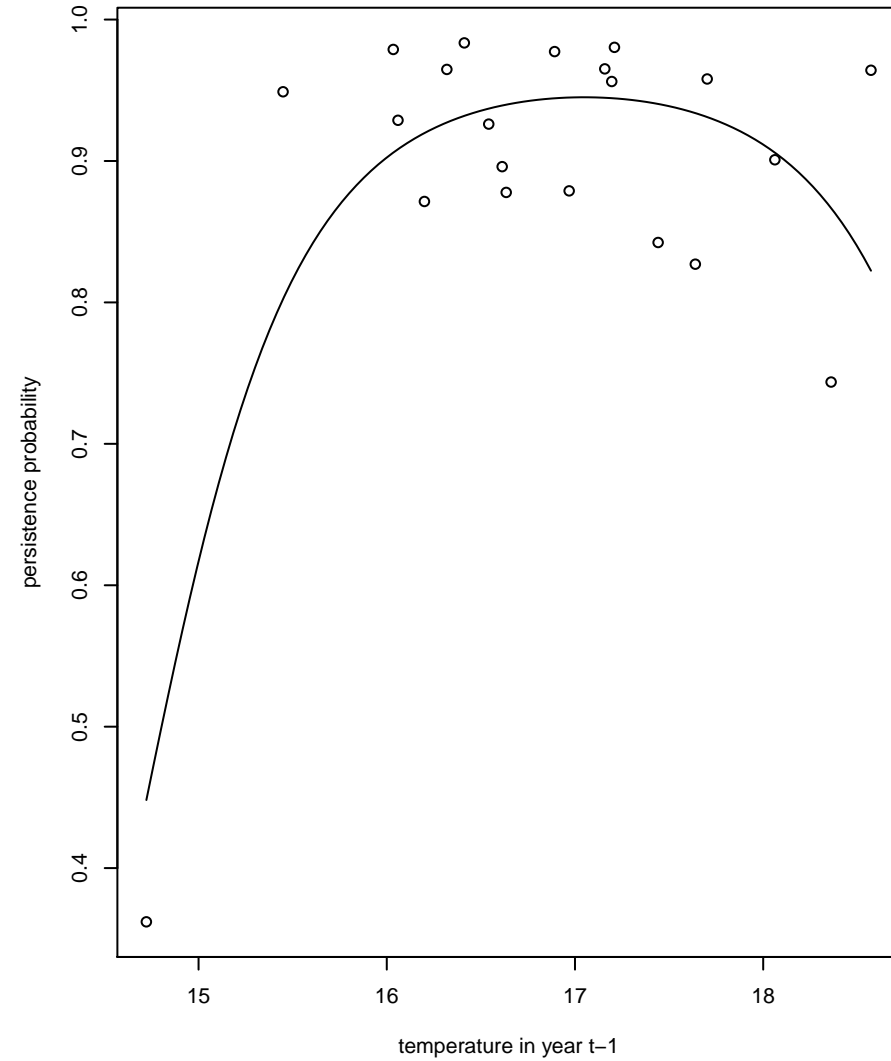

**Metrioptera brachyptera**

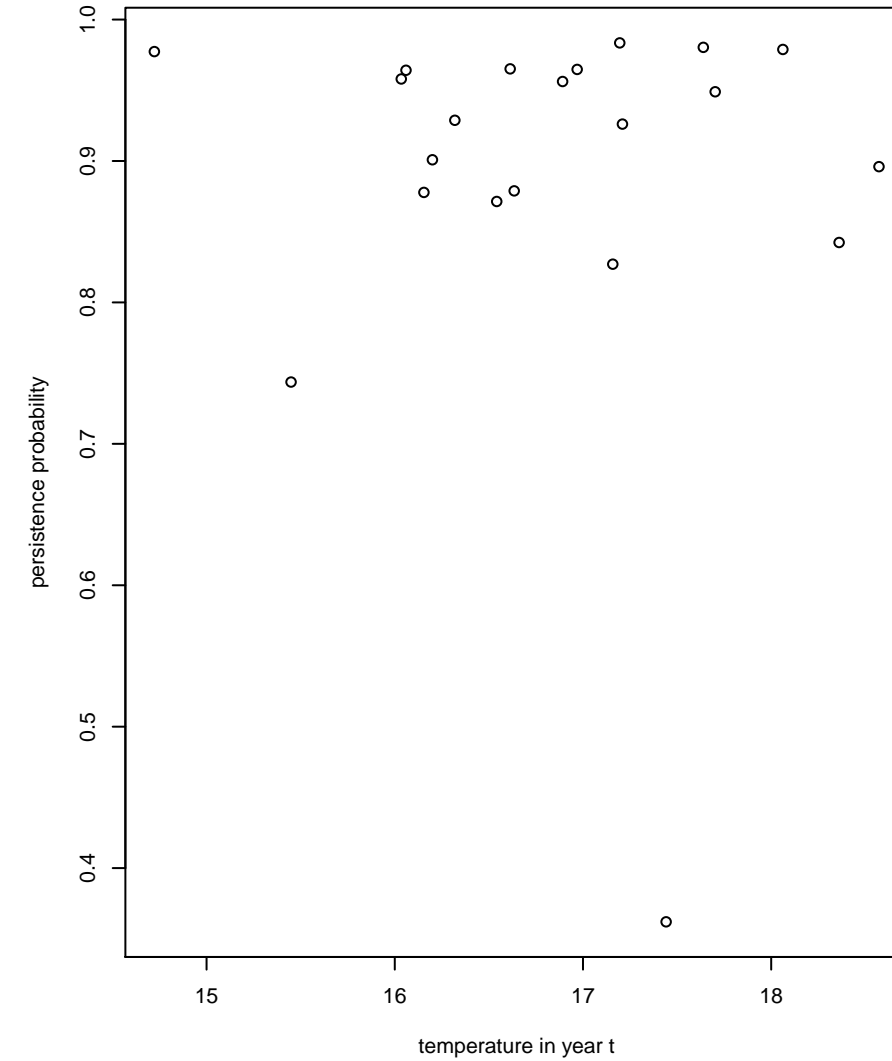

**Metrioptera roeselii**

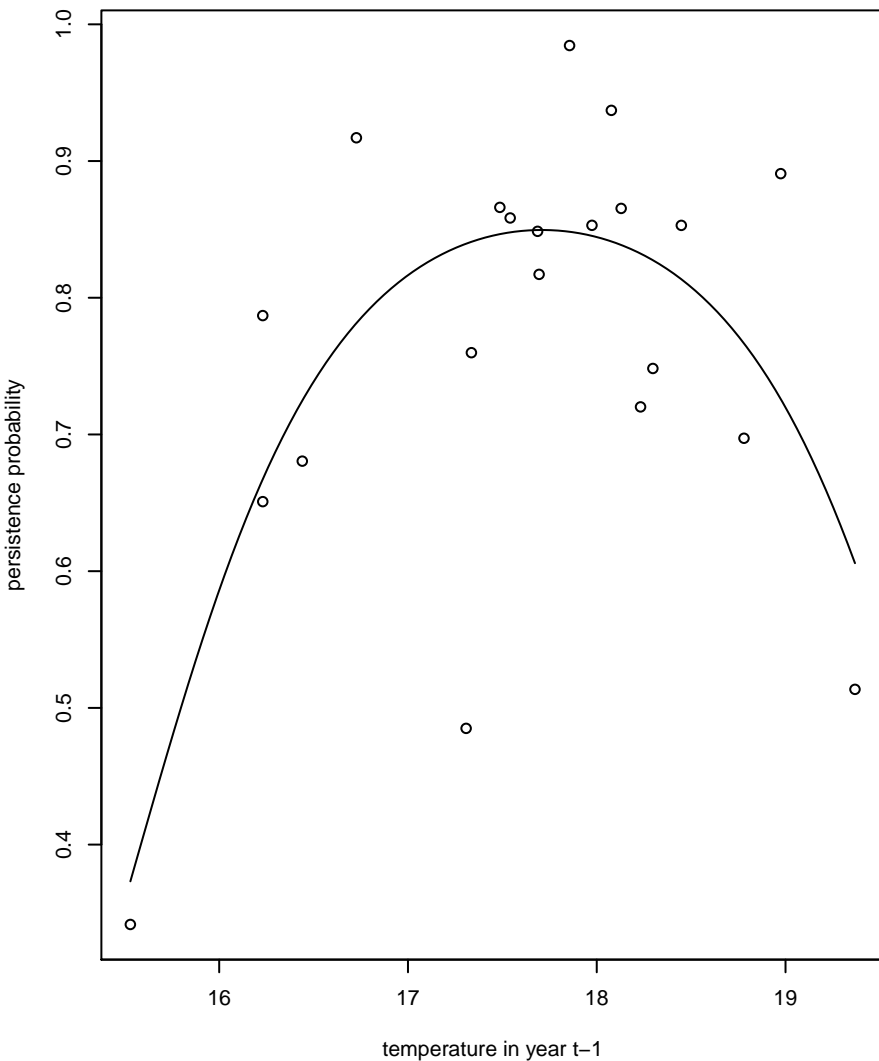

**Metrioptera roeselii**

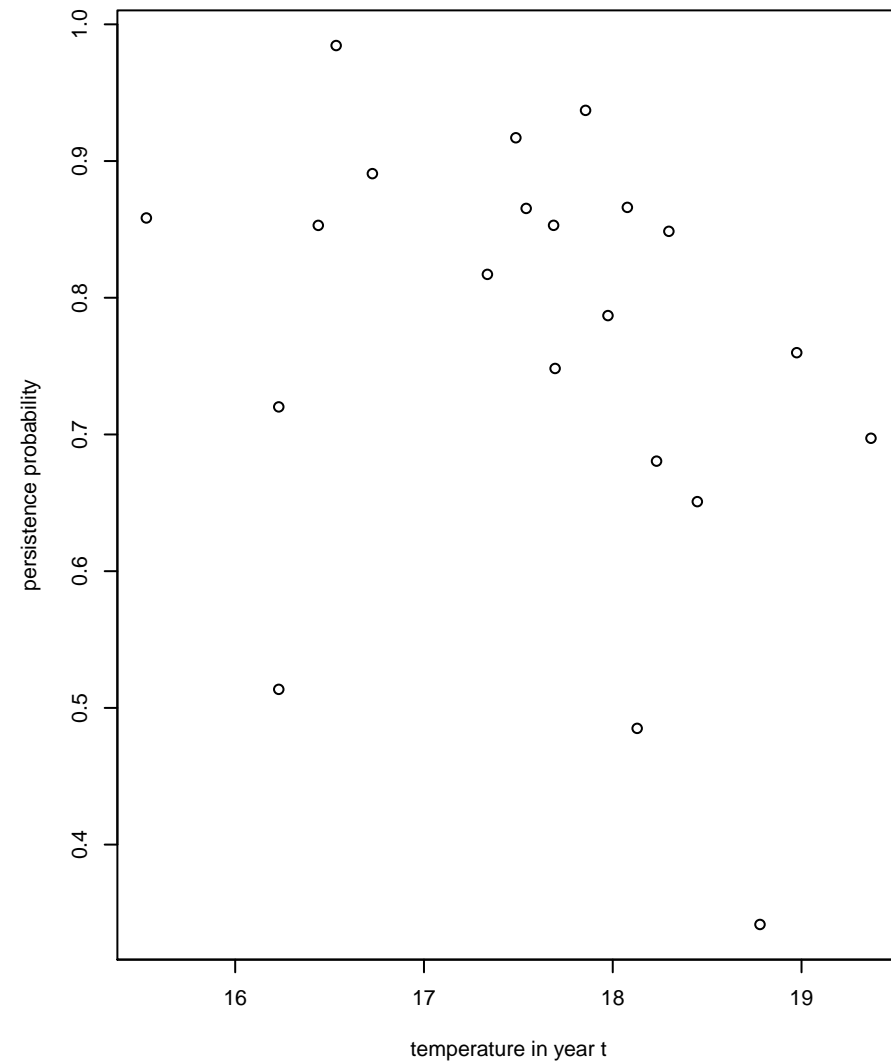

**Myrmeleotettix maculatus**

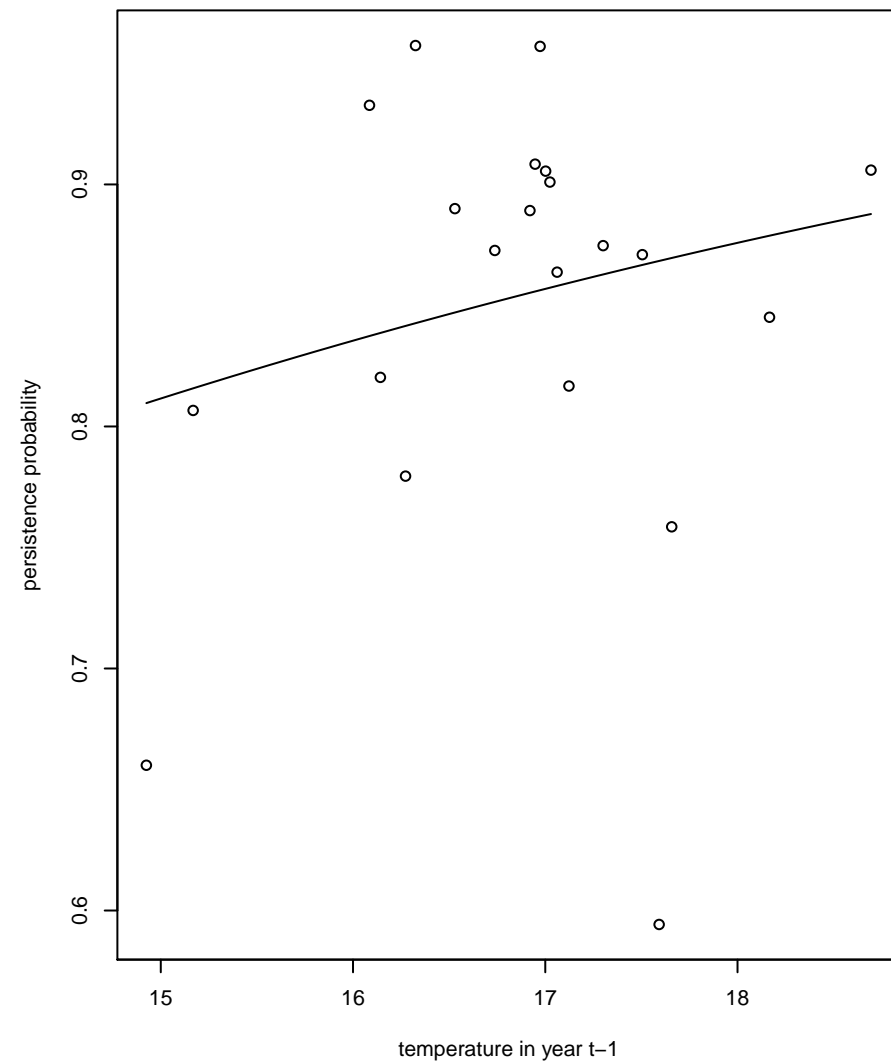

**Myrmeleotettix maculatus**

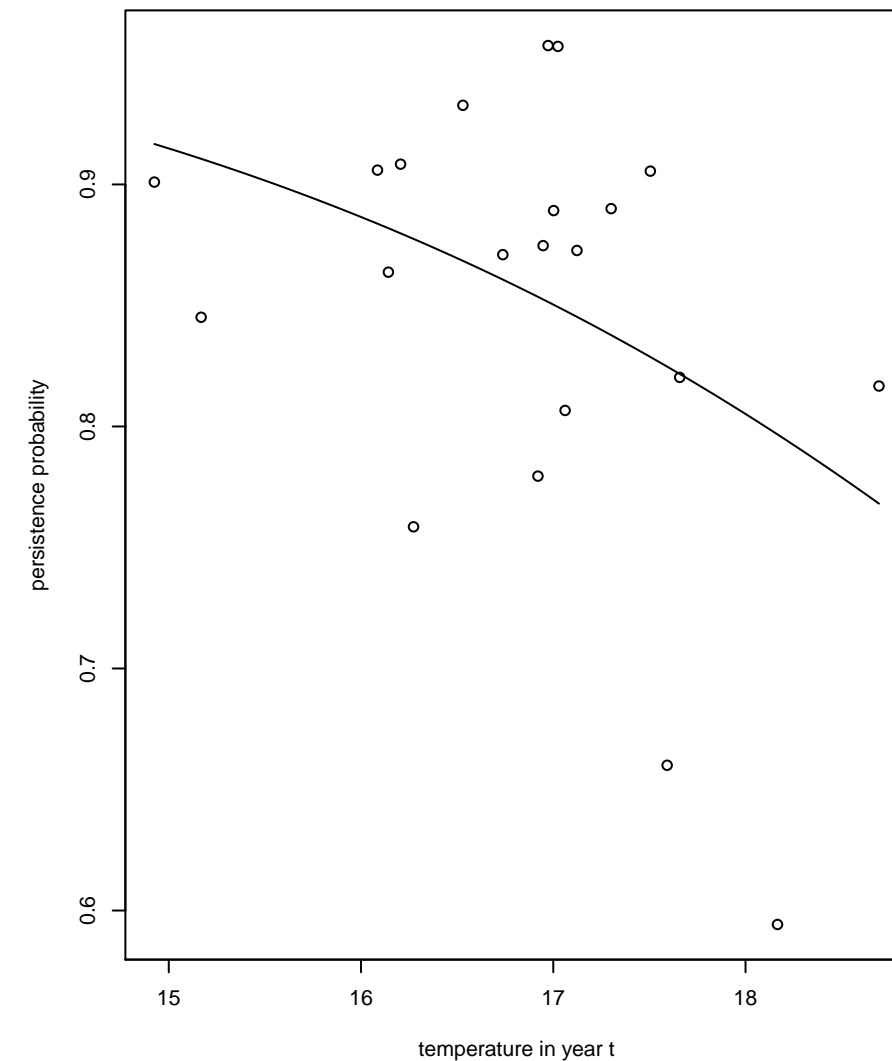

**Nemobius sylvestris**

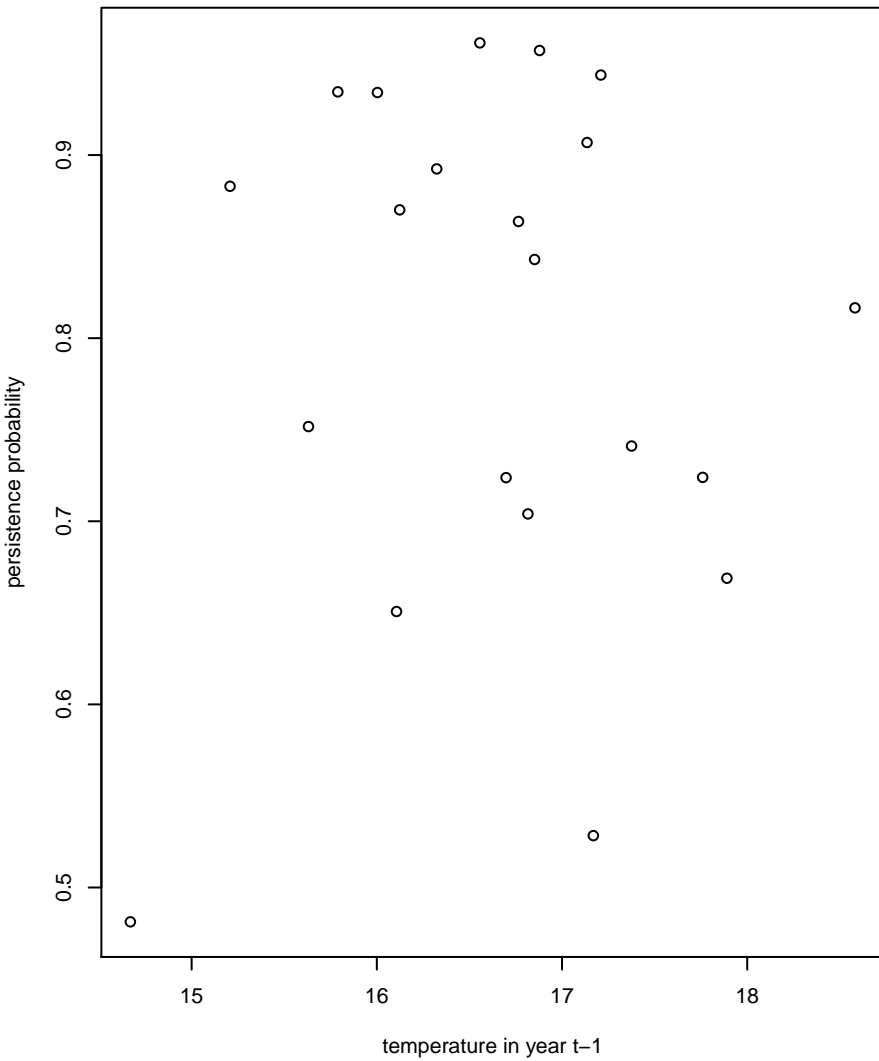

**Nemobius sylvestris**

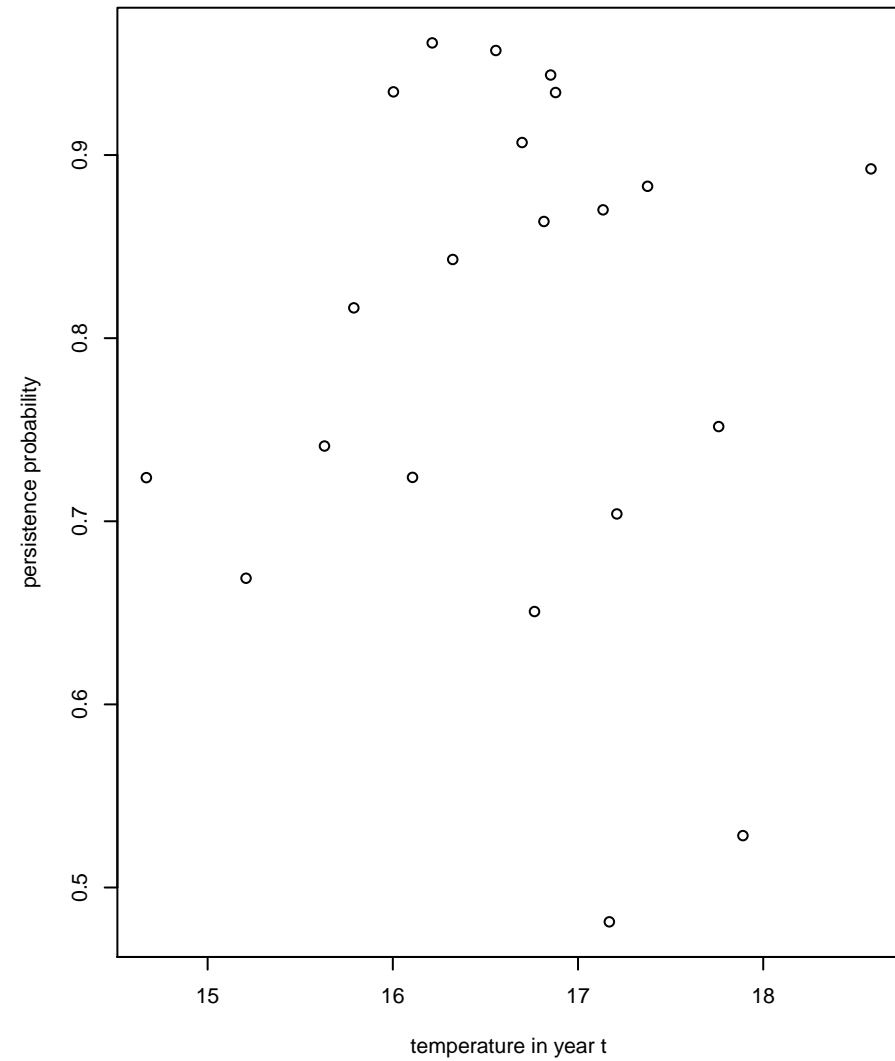

**Oedipoda caerulescens**

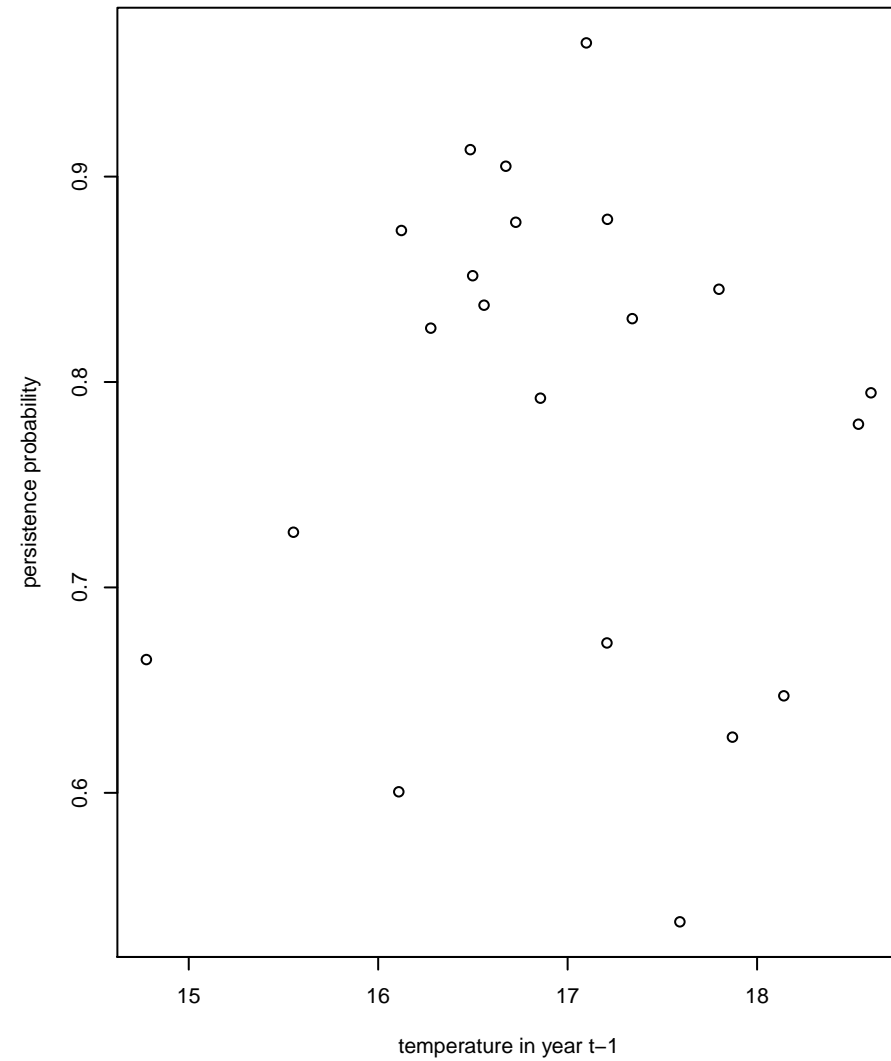

**Oedipoda caerulescens**

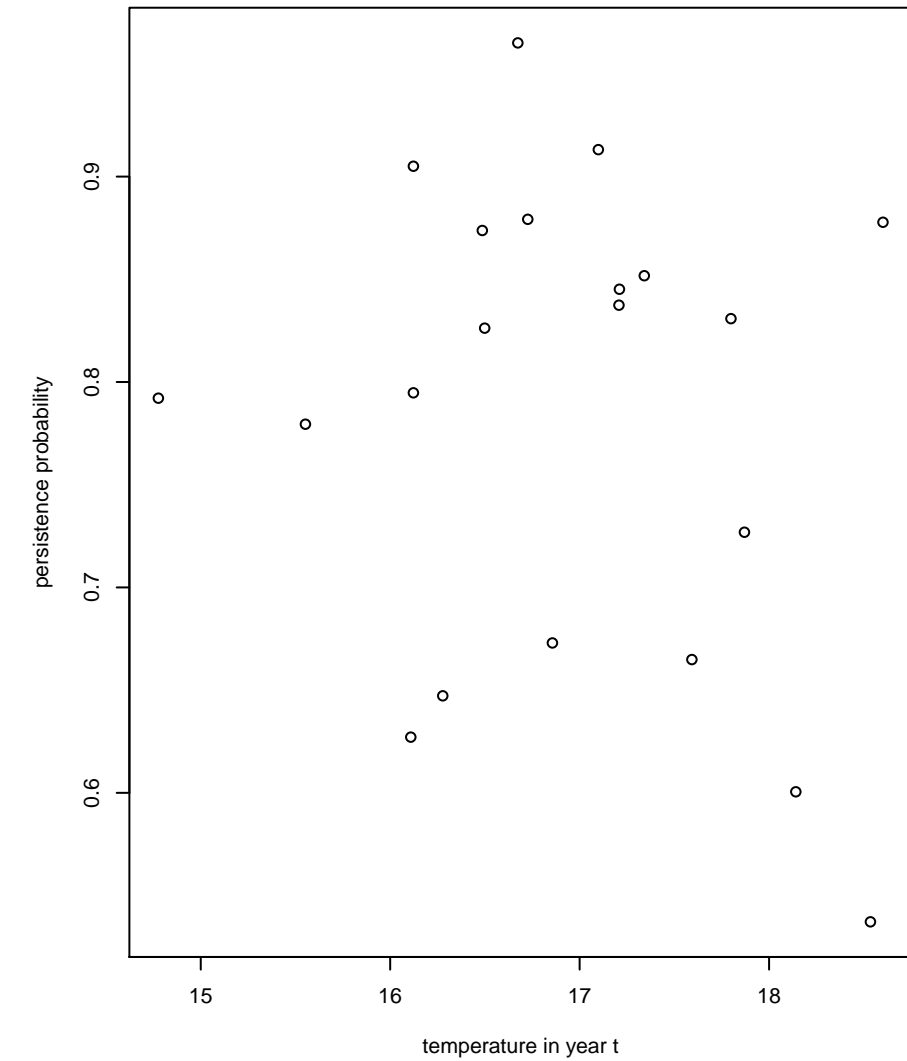

**Omocestus rufipes**

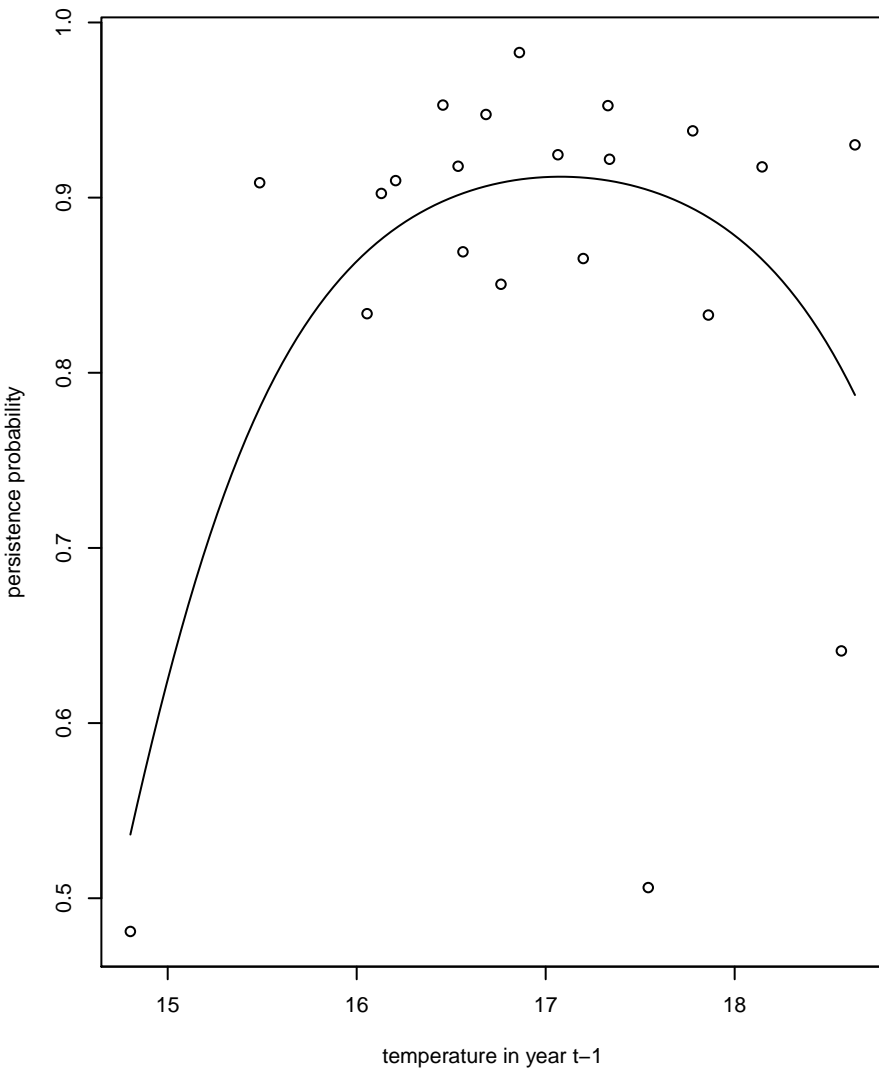

**Omocestus rufipes**

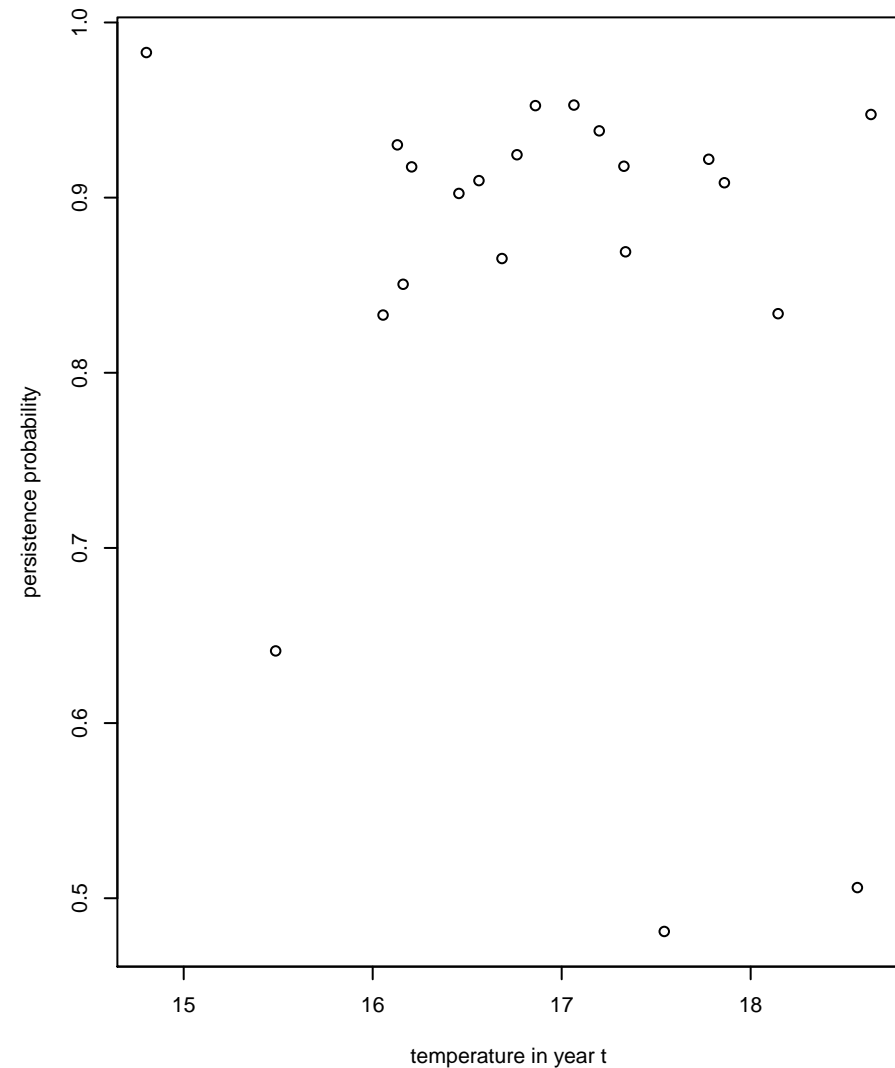

**Omocestus viridulus**

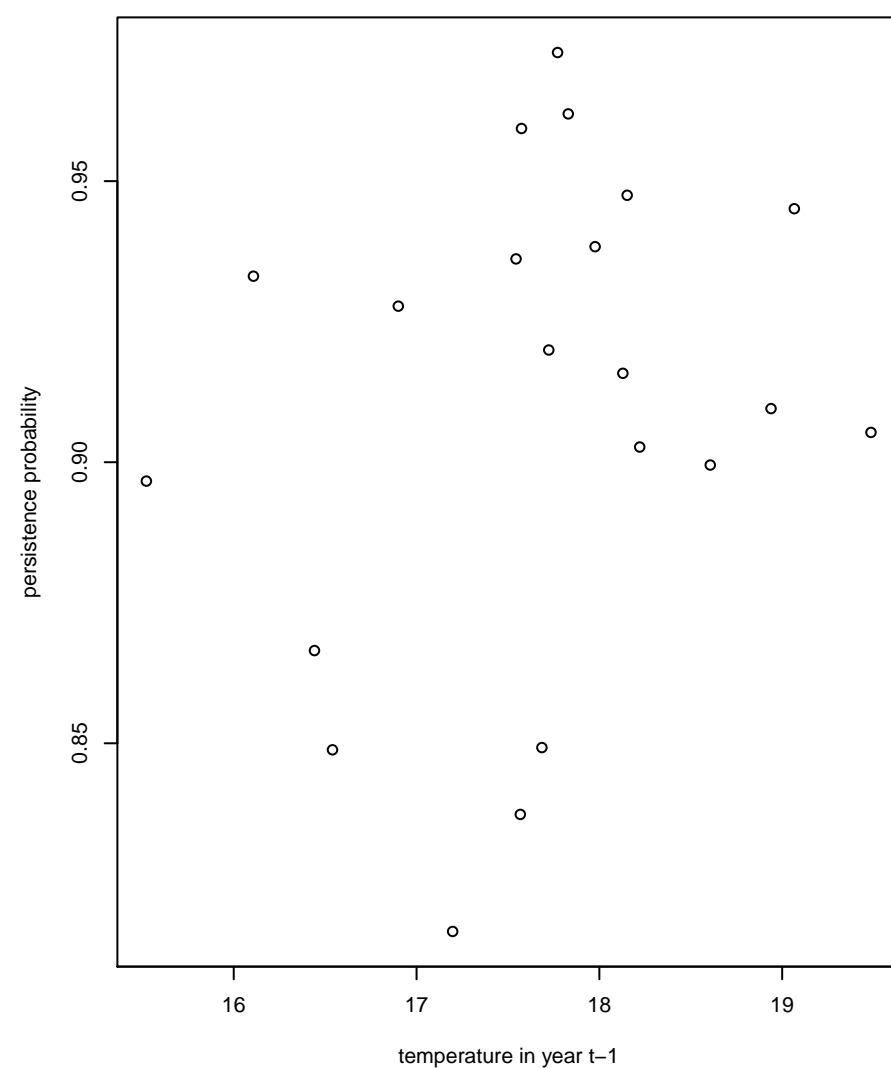

**Omocestus viridulus**

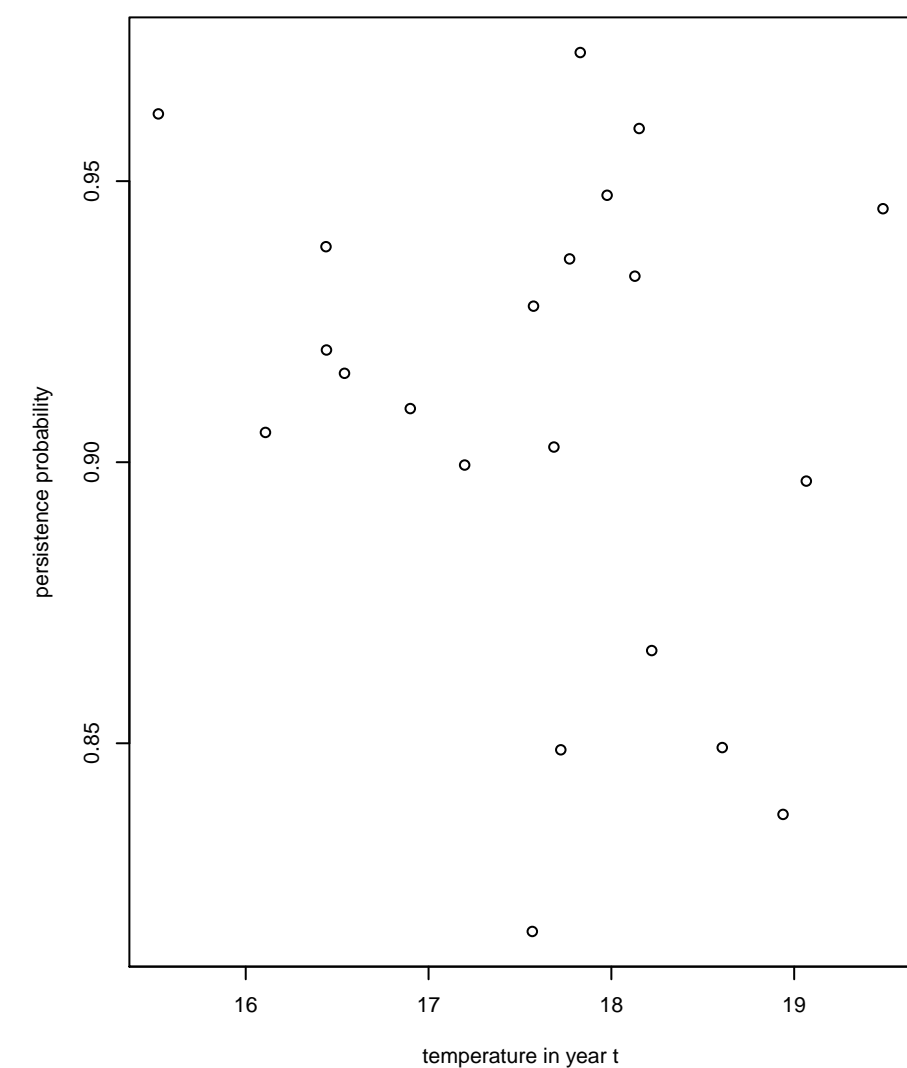



**Pholidoptera griseoptera**

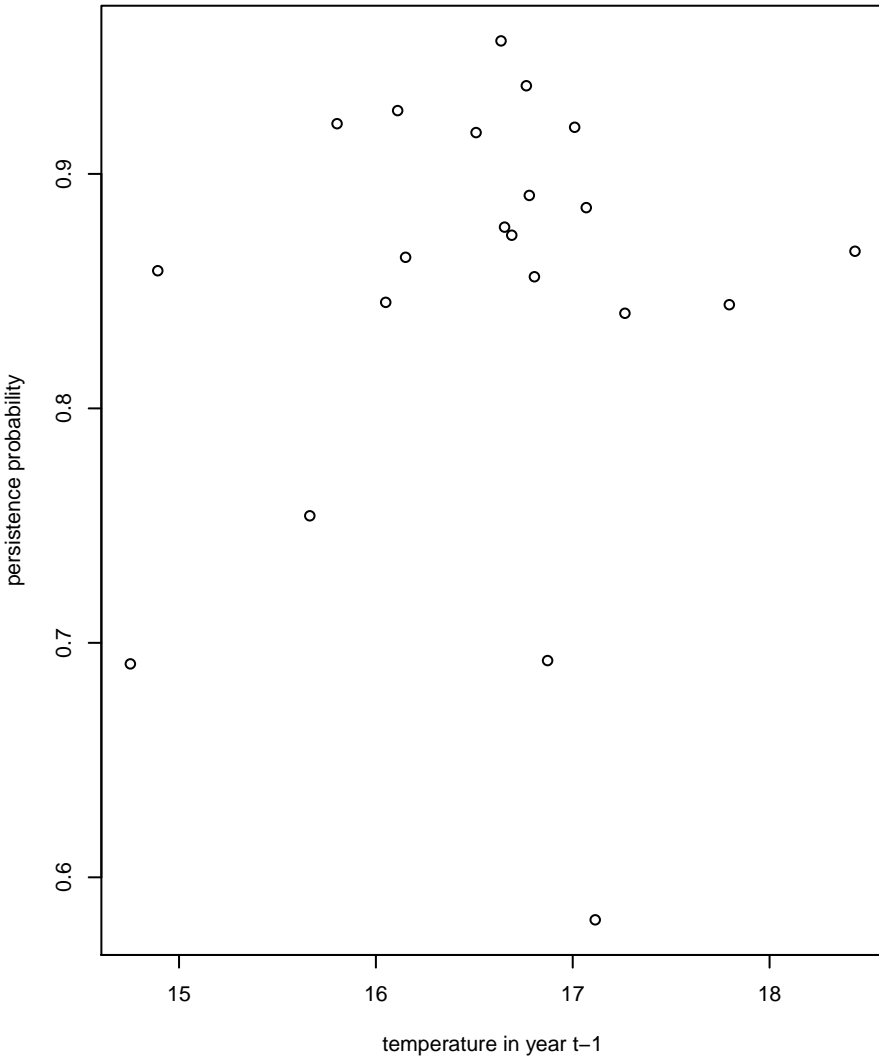

**Pholidoptera griseoptera**

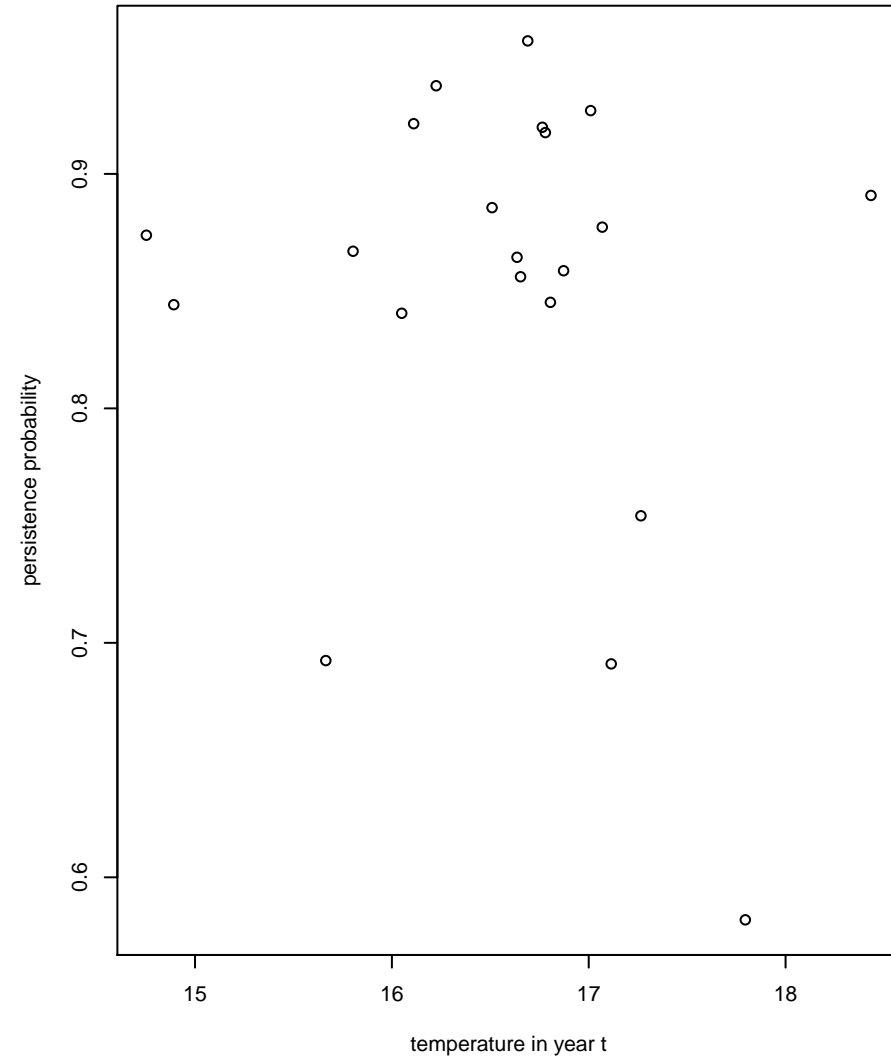

**Stenobothrus lineatus**

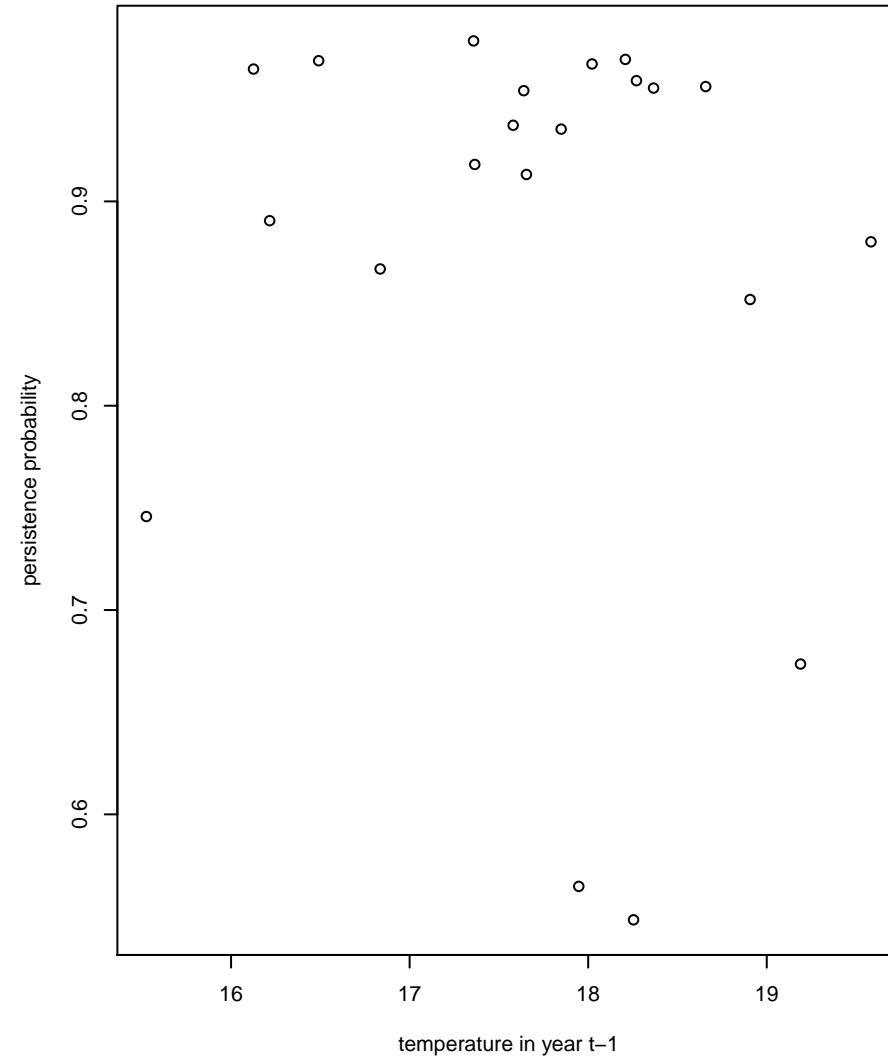

**Stenobothrus lineatus**

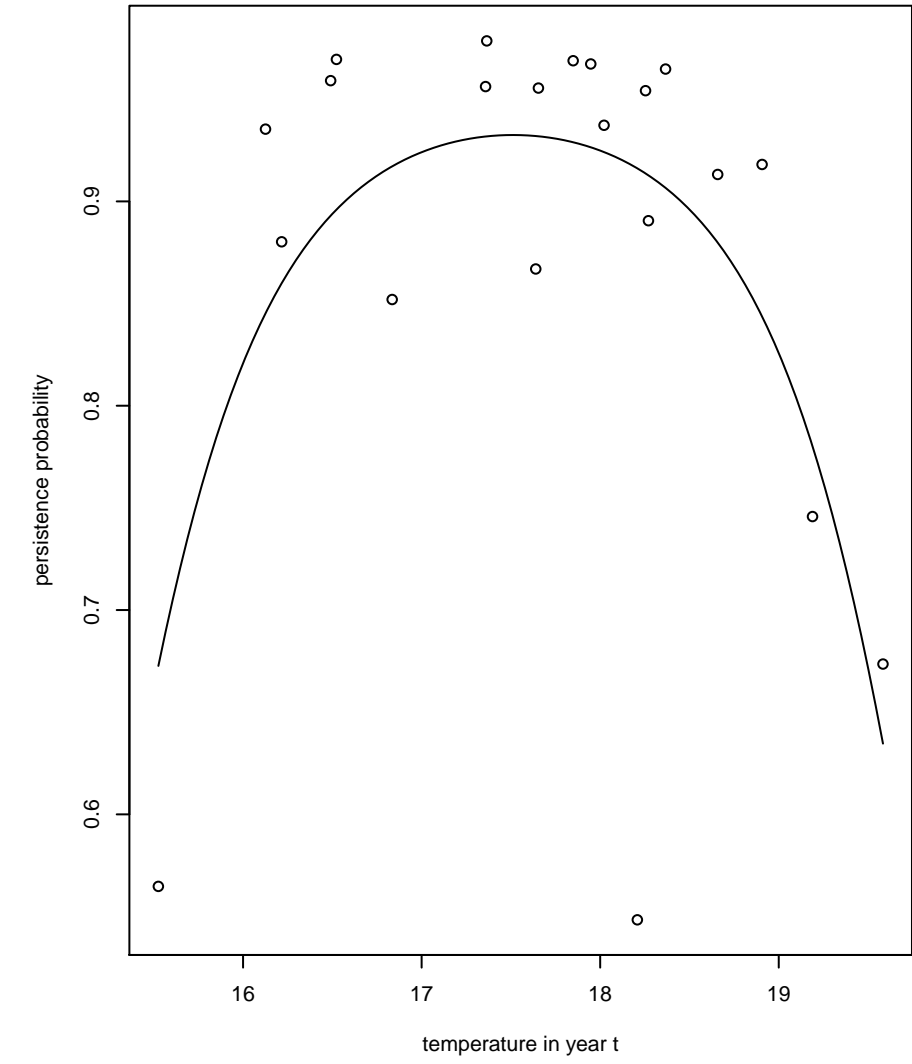

**Stenobothrus stigmaticus**

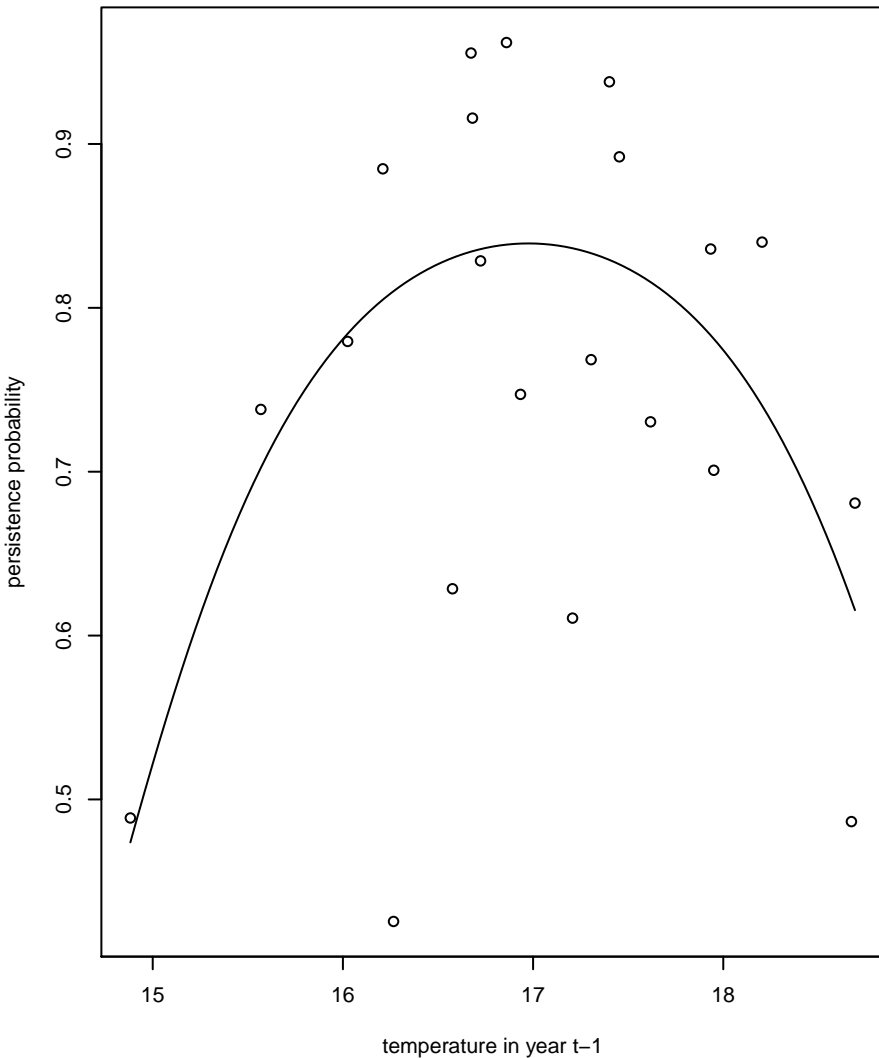

**Stenobothrus stigmaticus**

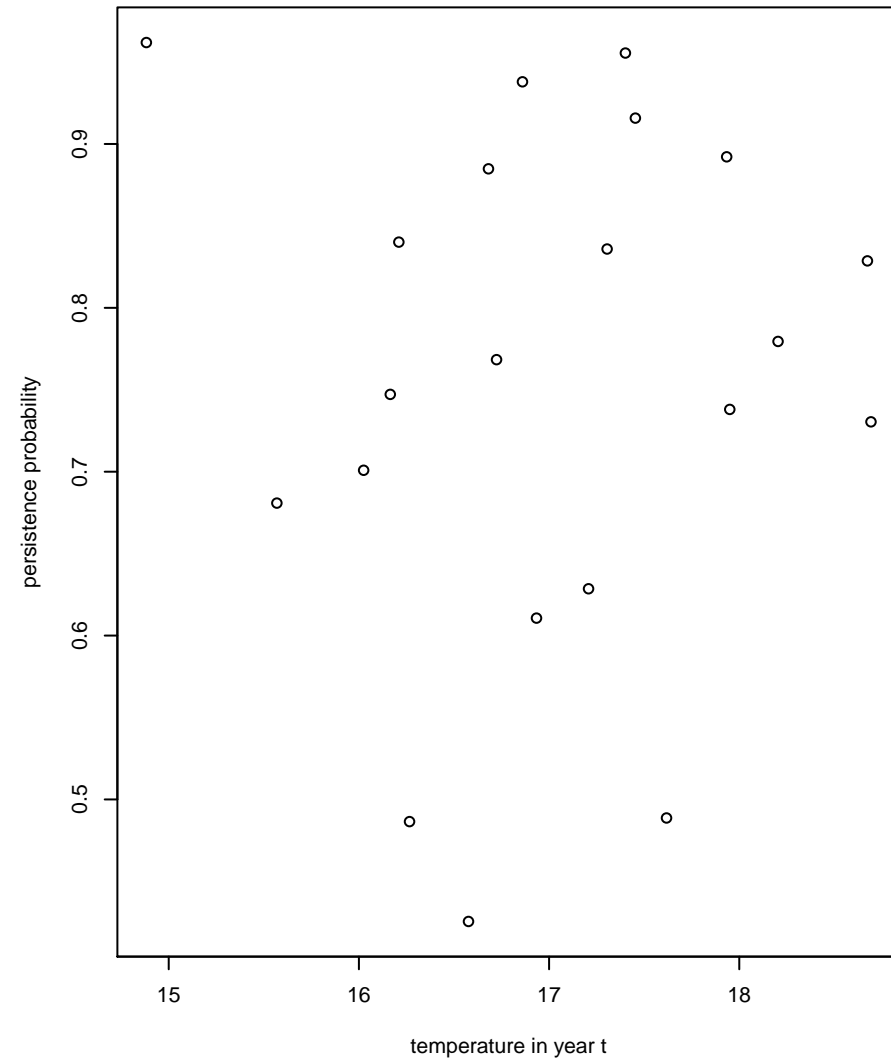

**Stethophyma grossum**

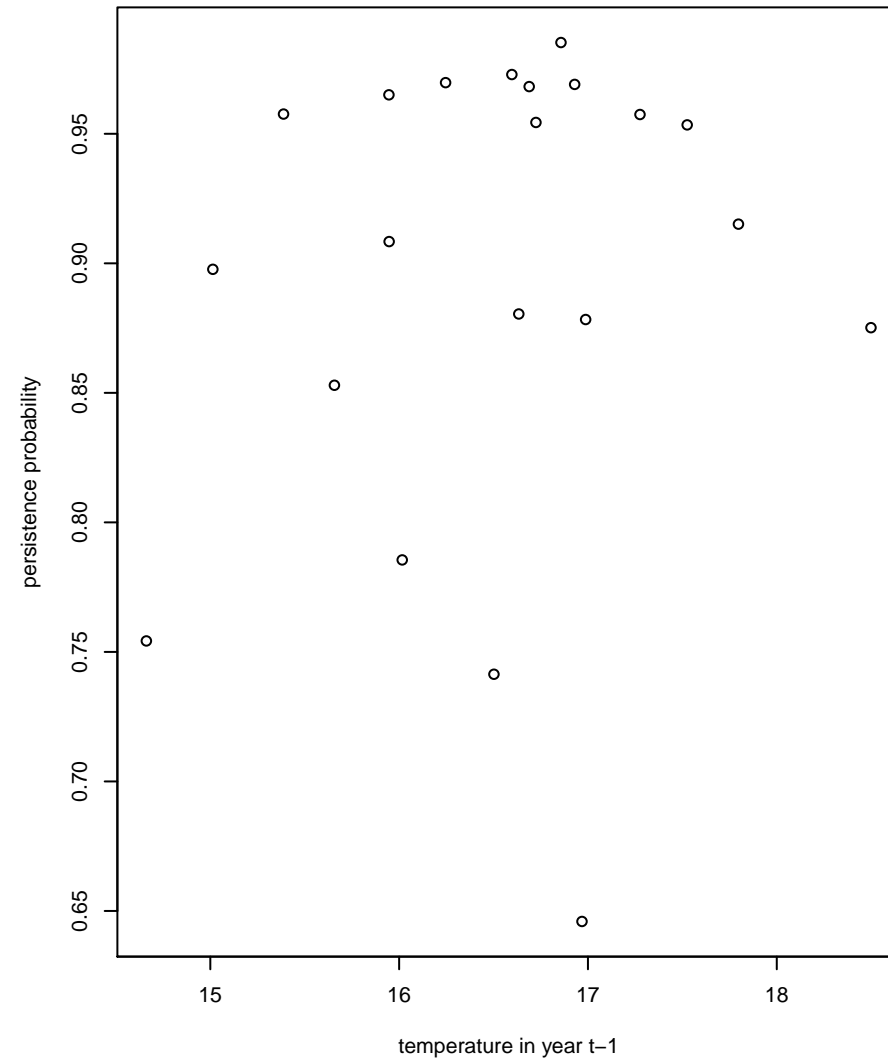

**Stethophyma grossum**

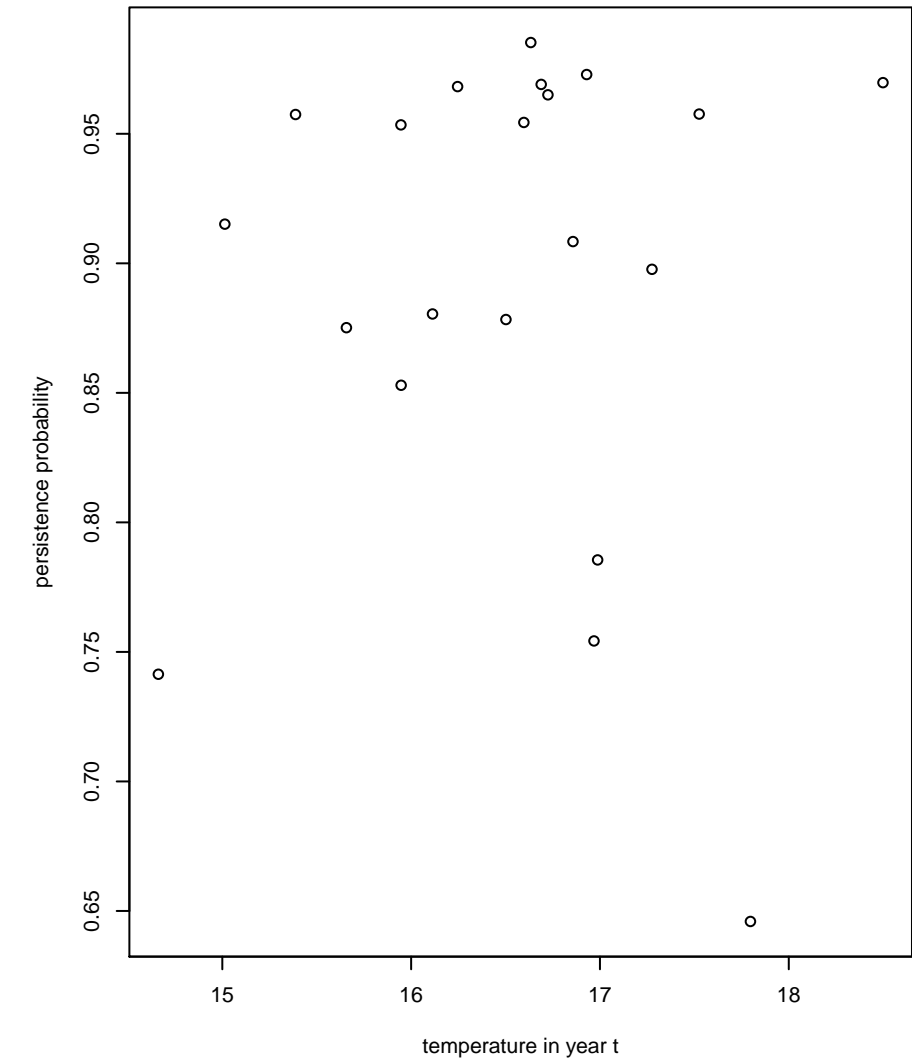

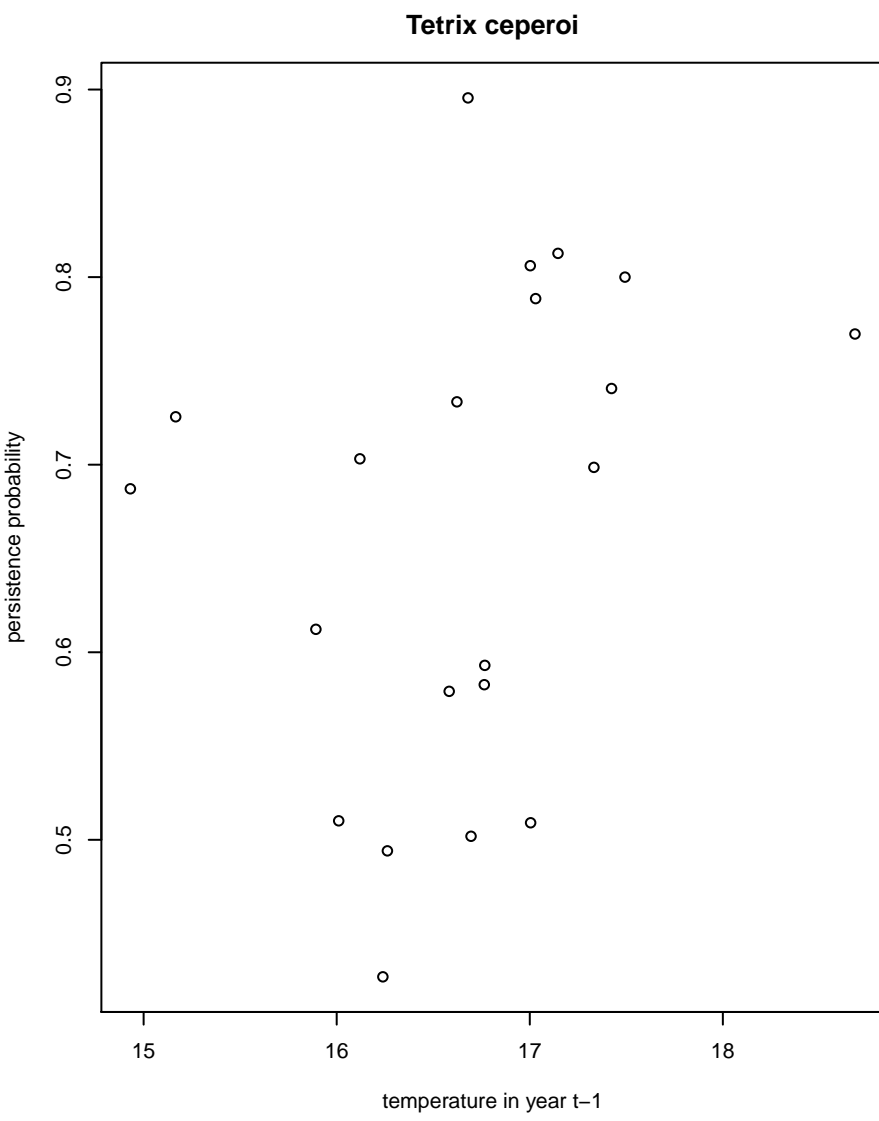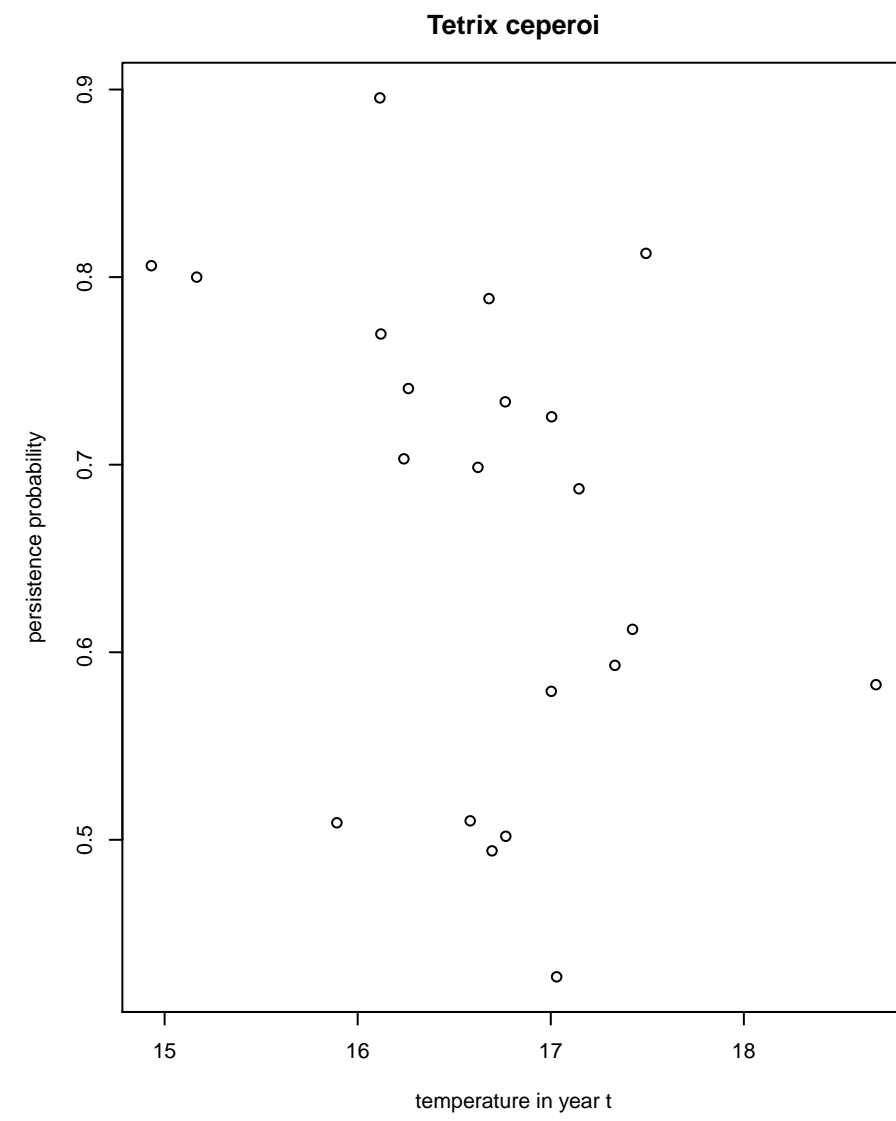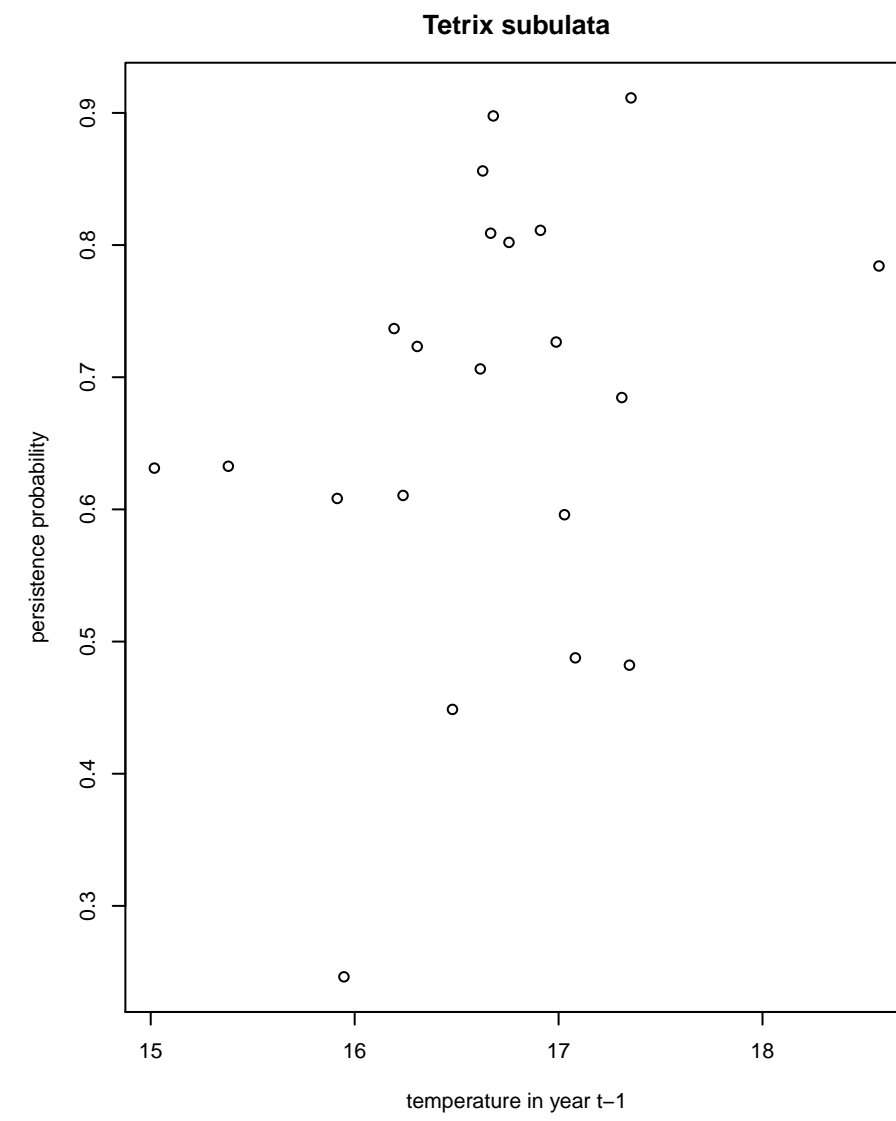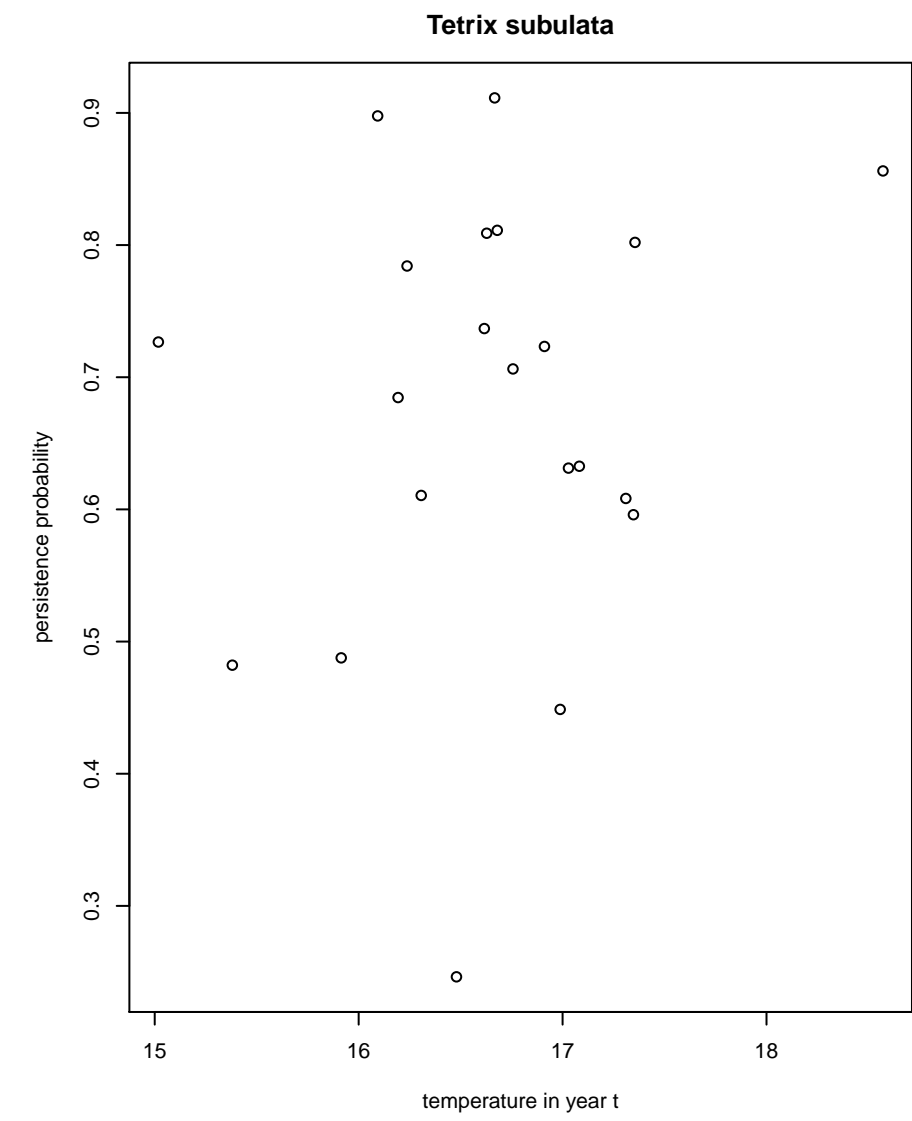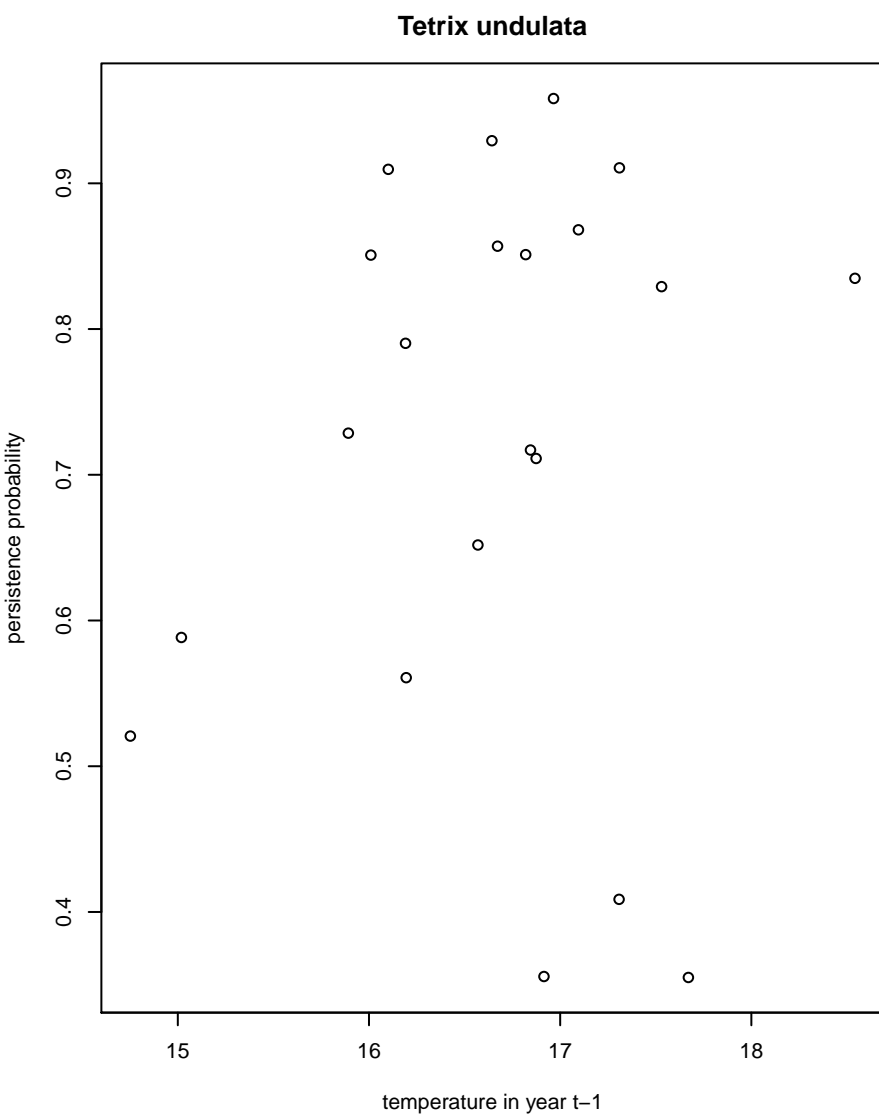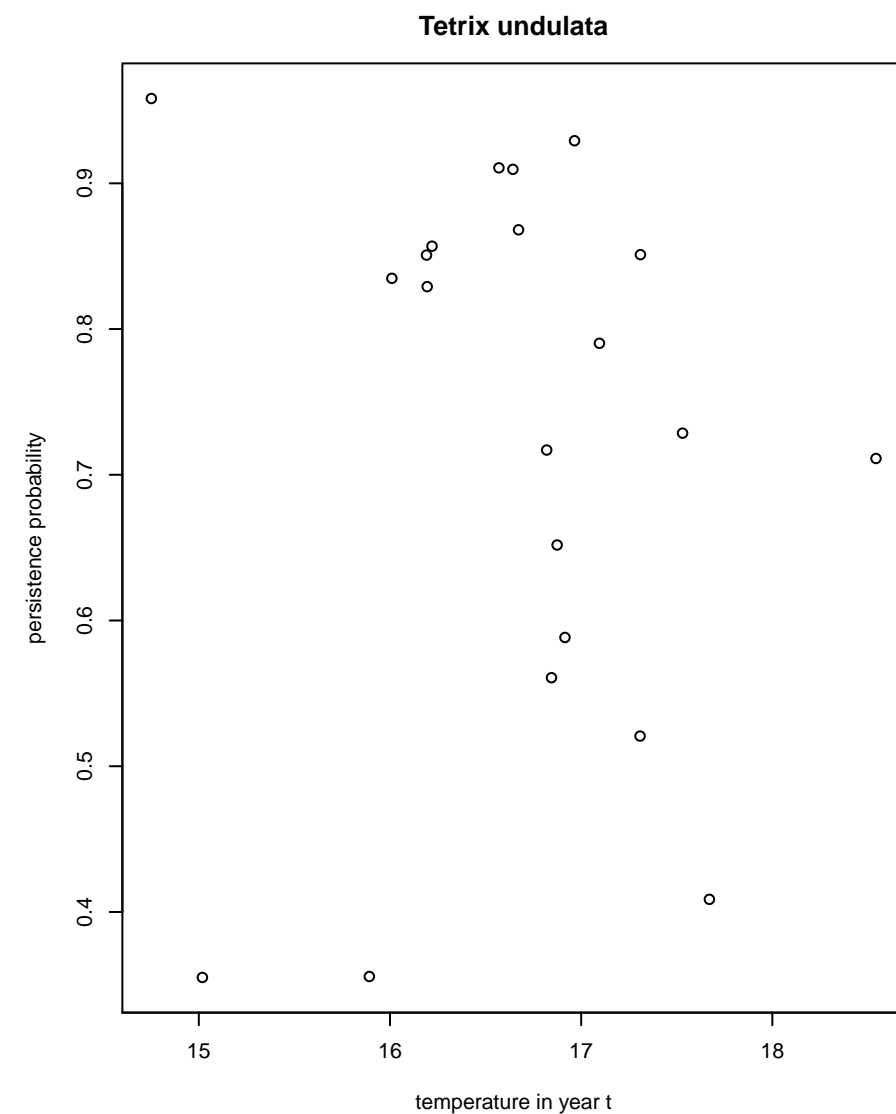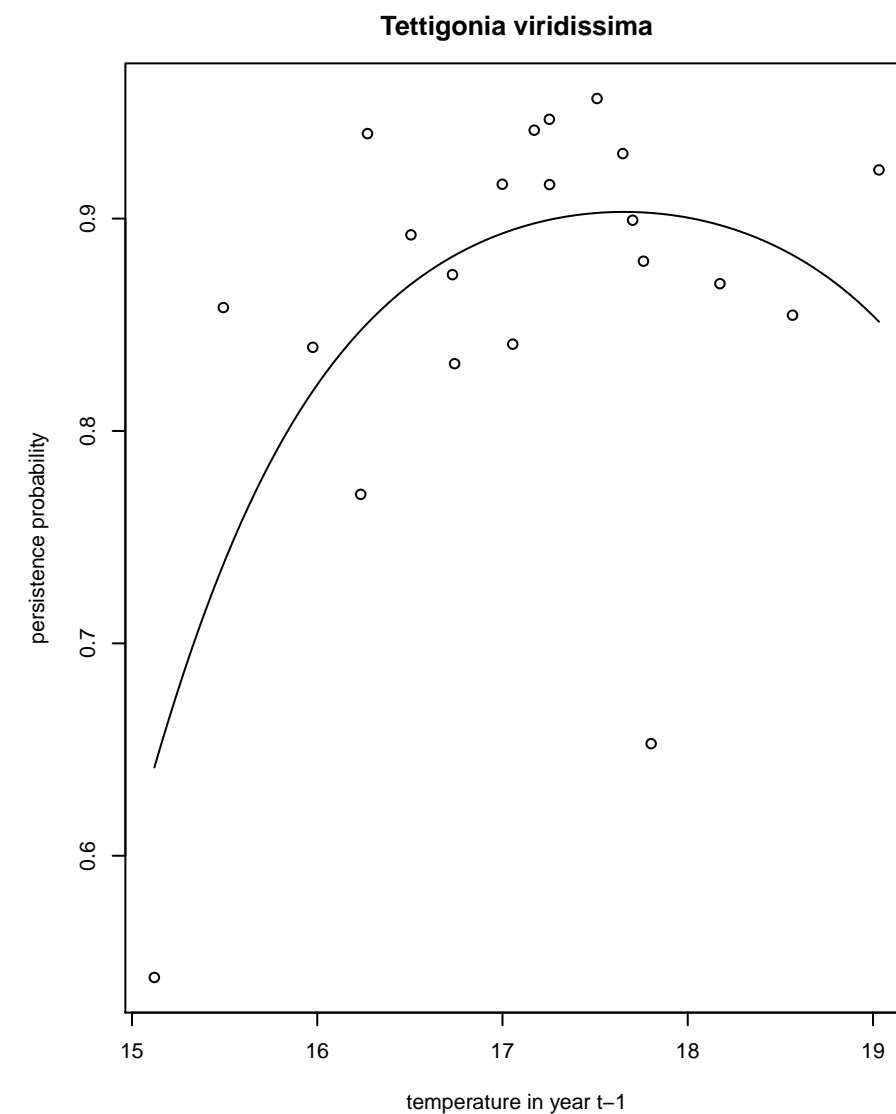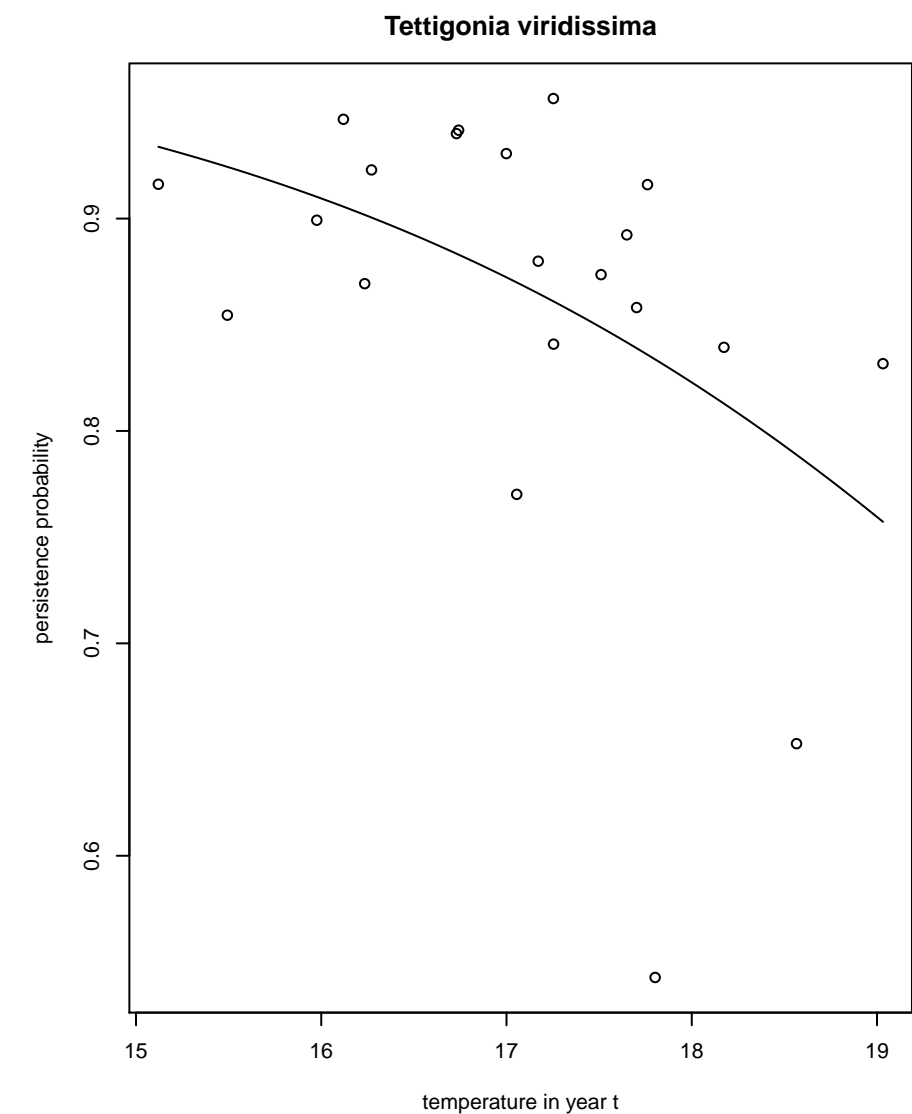

**Coenagrion puella**

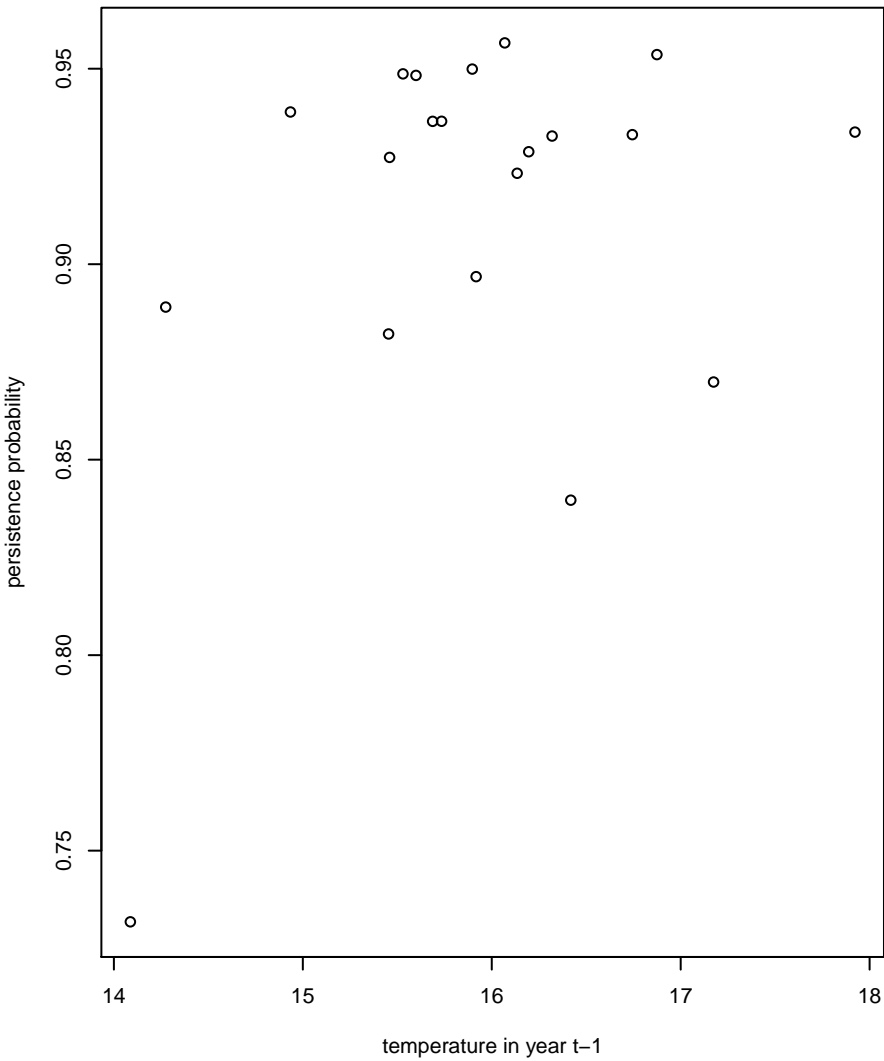

**Coenagrion puella**

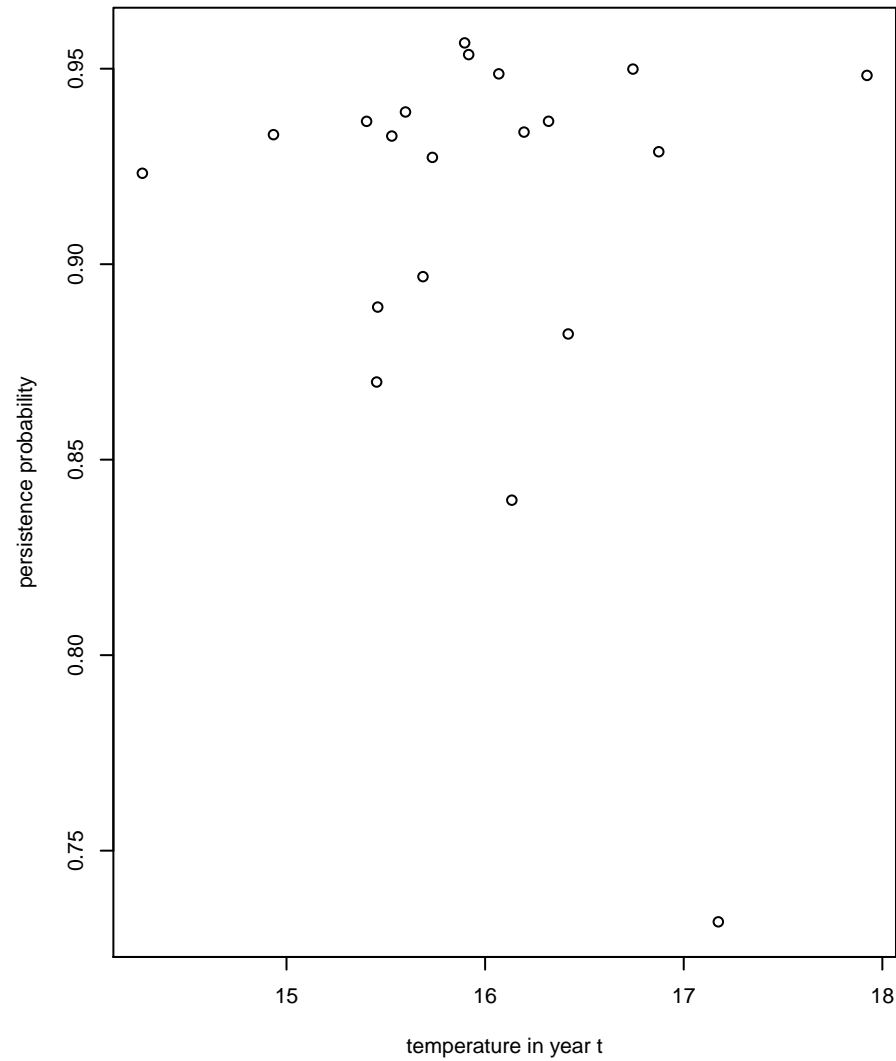

**Erythromma najas**

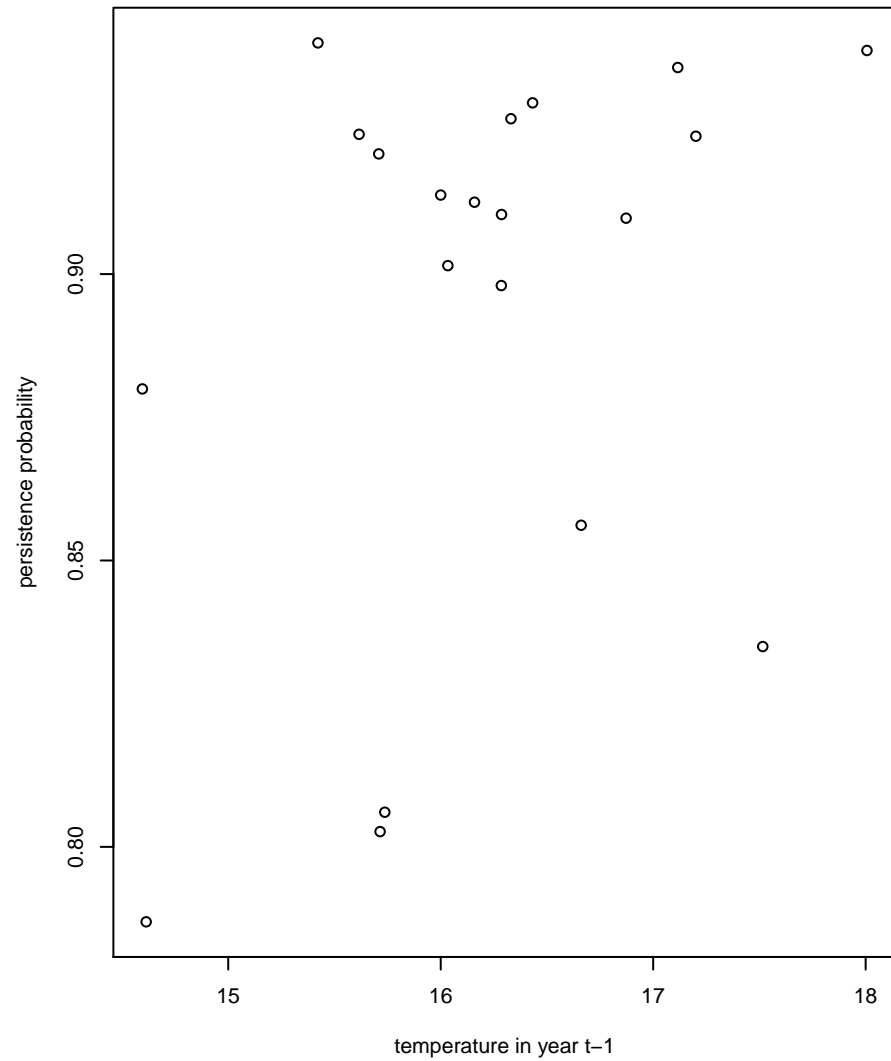

**Erythromma najas**

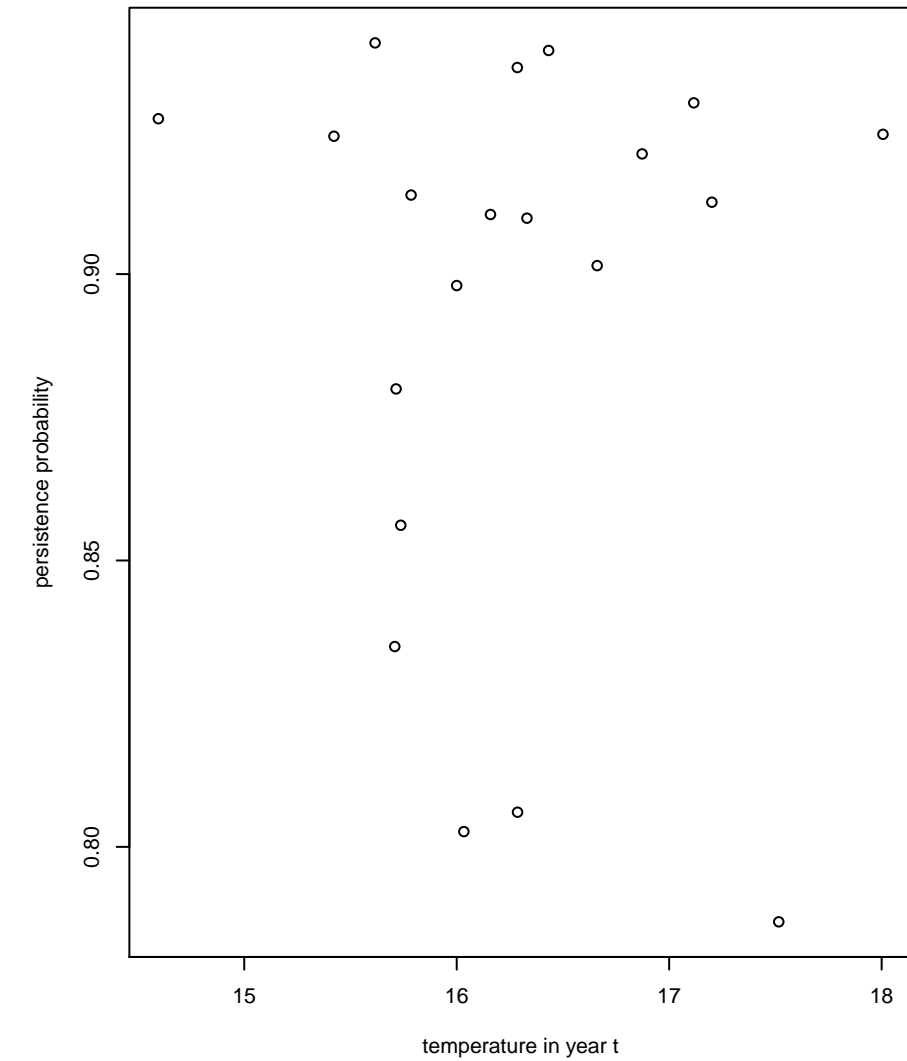

**Brachytron pratense**

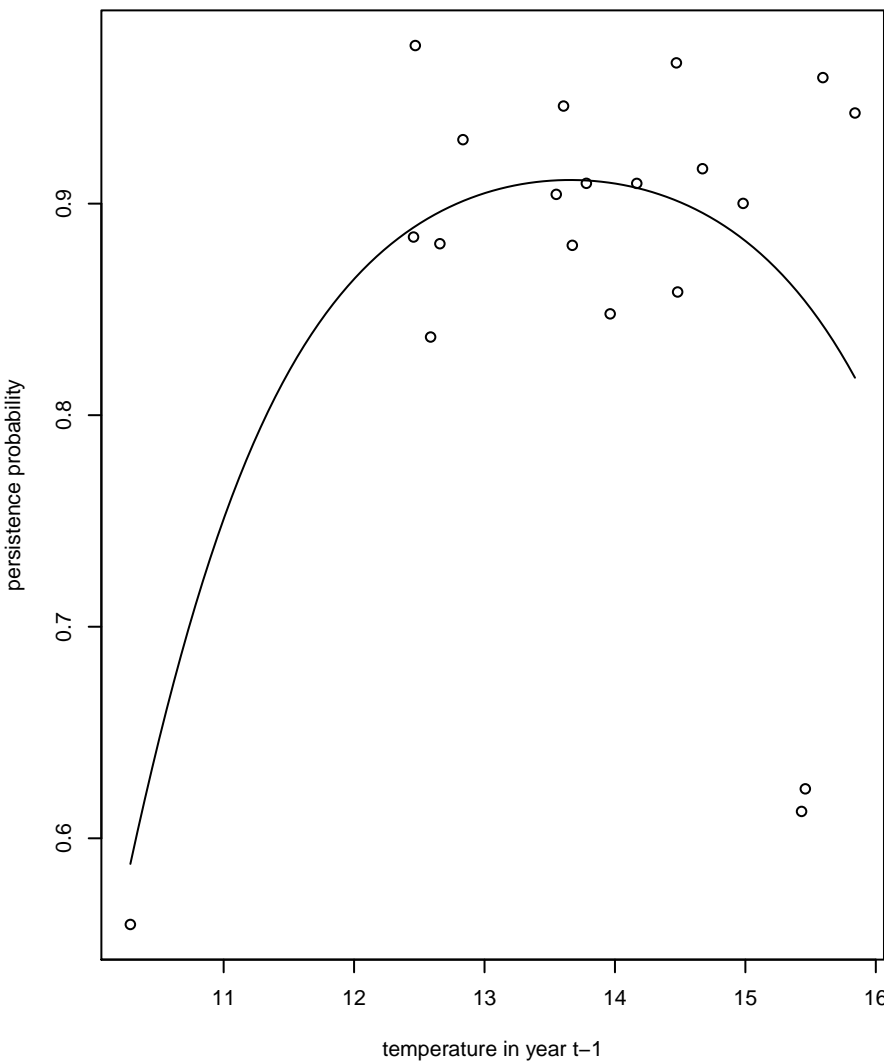

**Brachytron pratense**

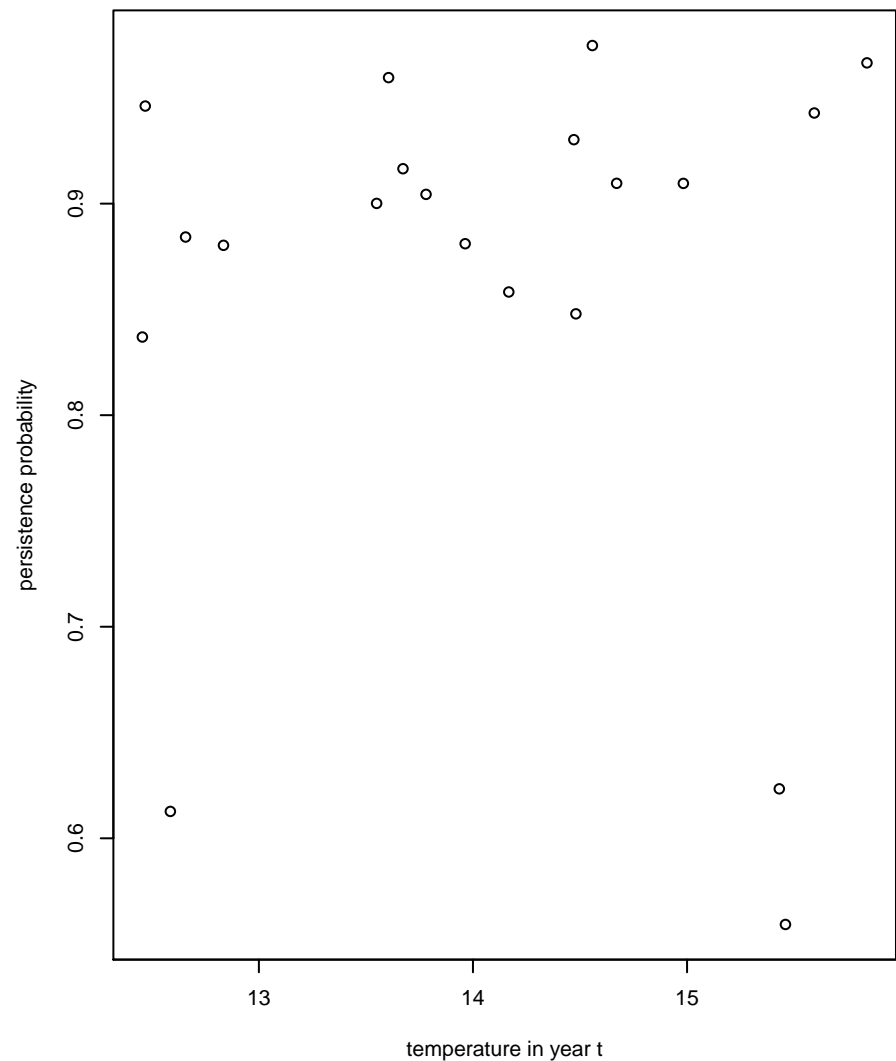

**Pyrrhosoma nymphula**

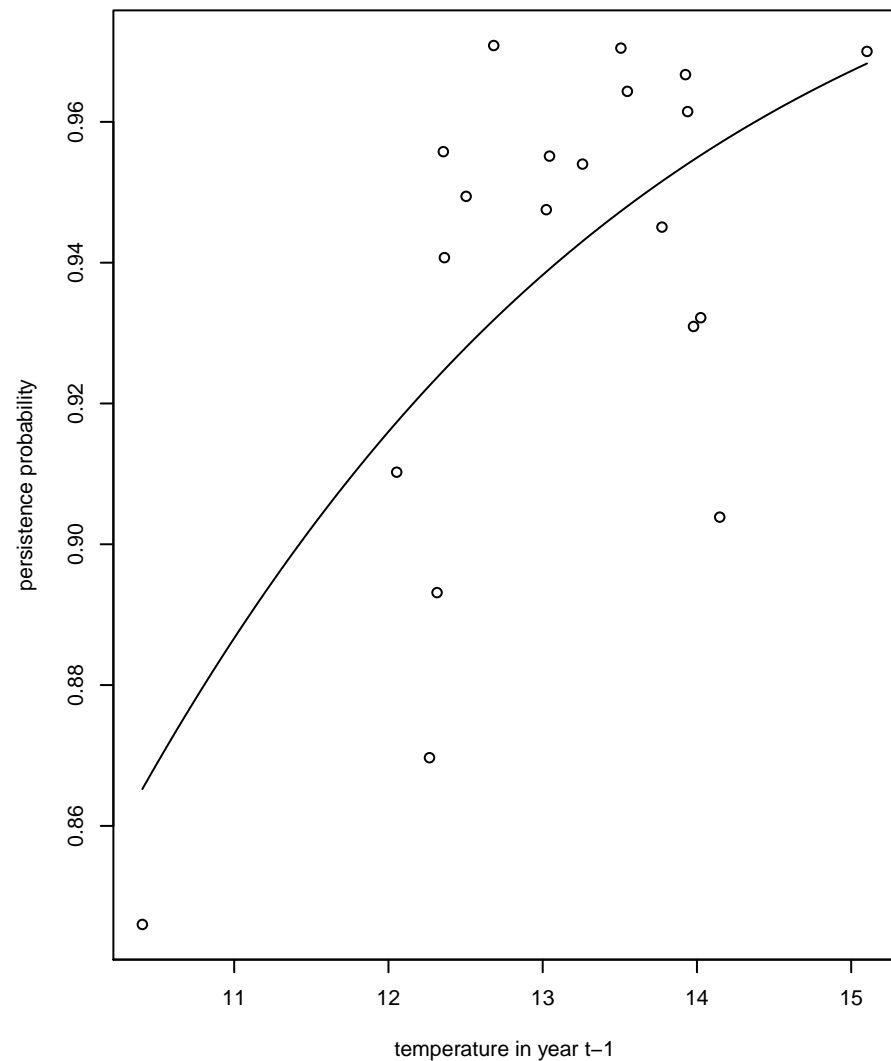

**Pyrrhosoma nymphula**

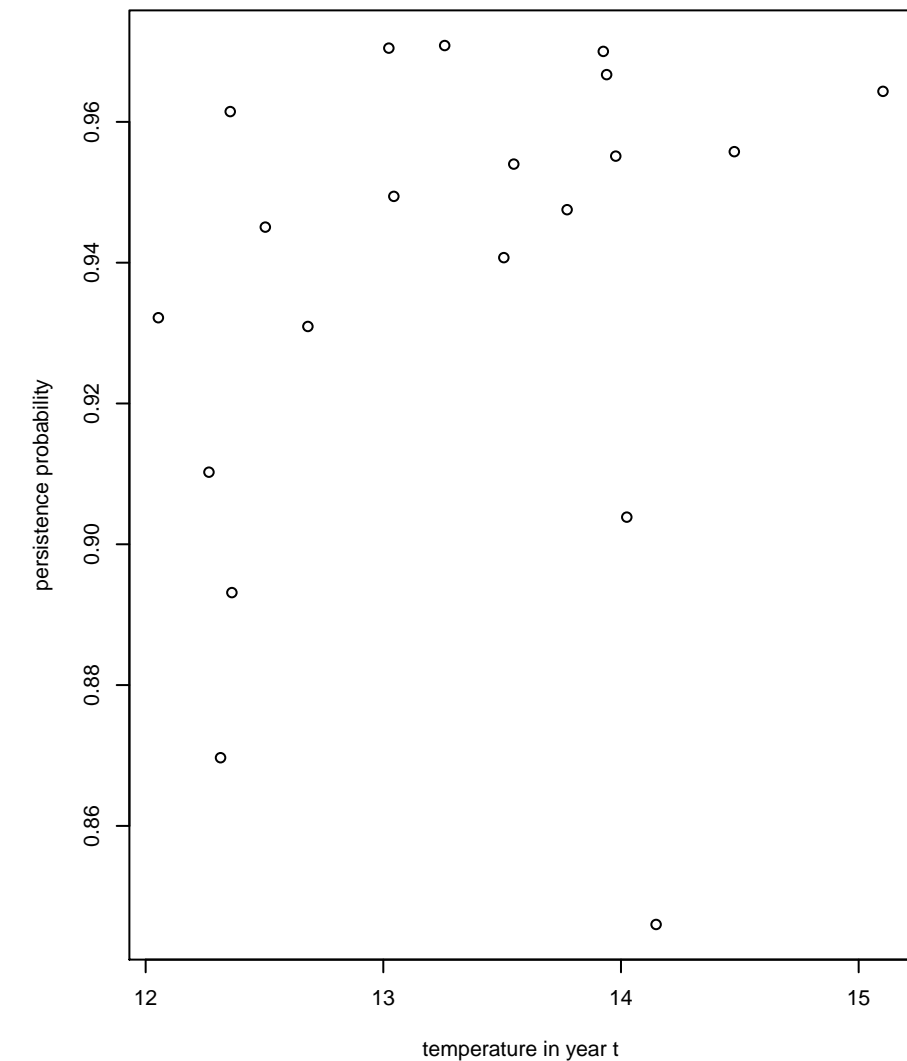

**Coenagrion pulchellum**

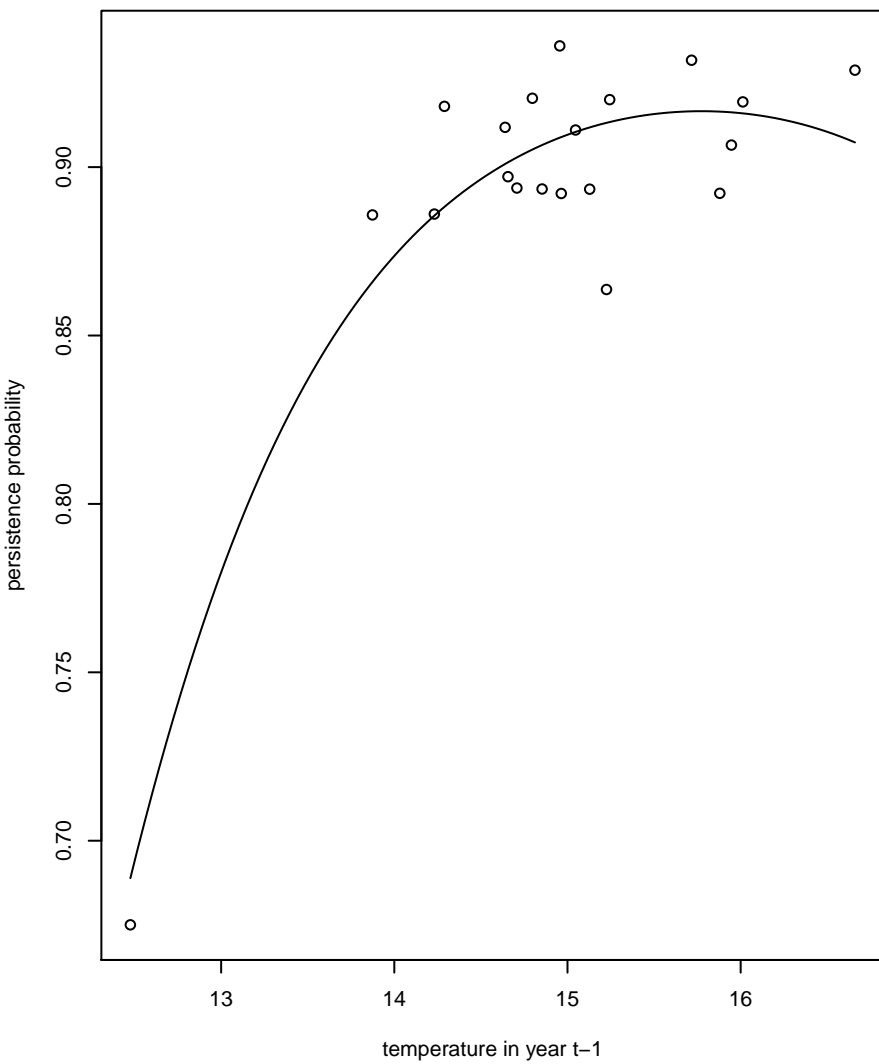

**Coenagrion pulchellum**

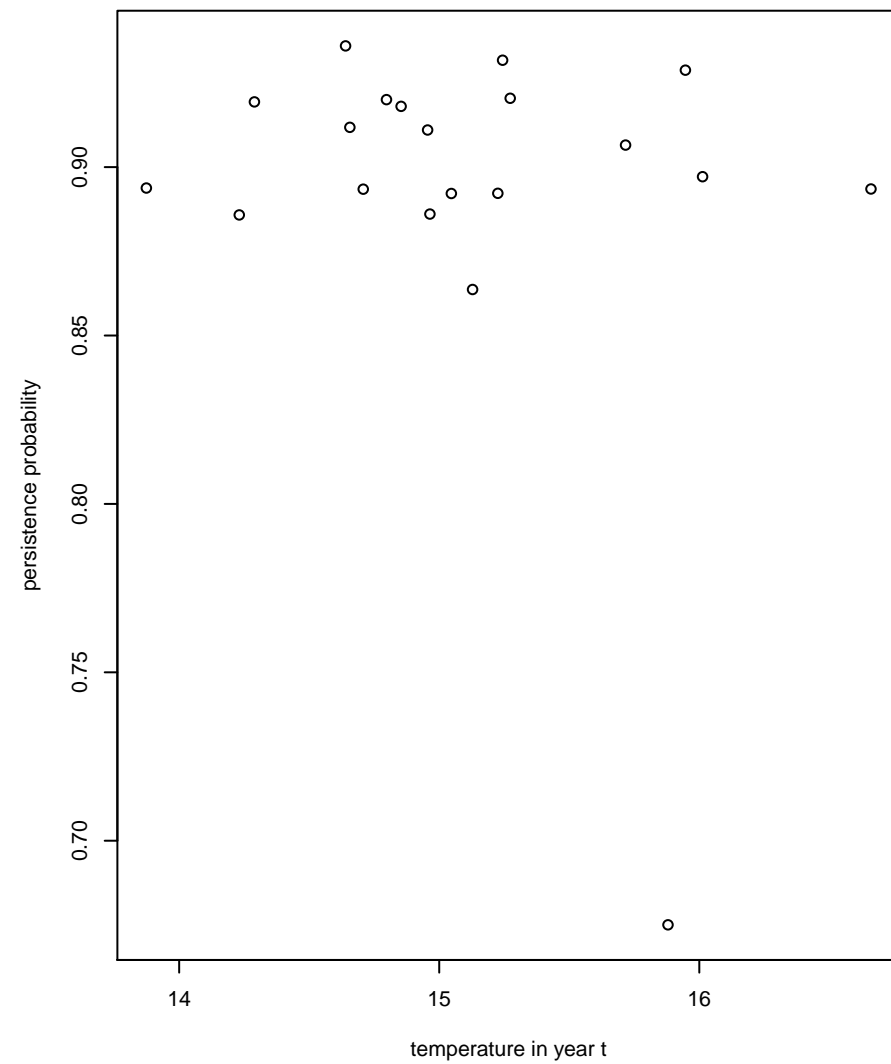

**Sympetrum vulgatum**

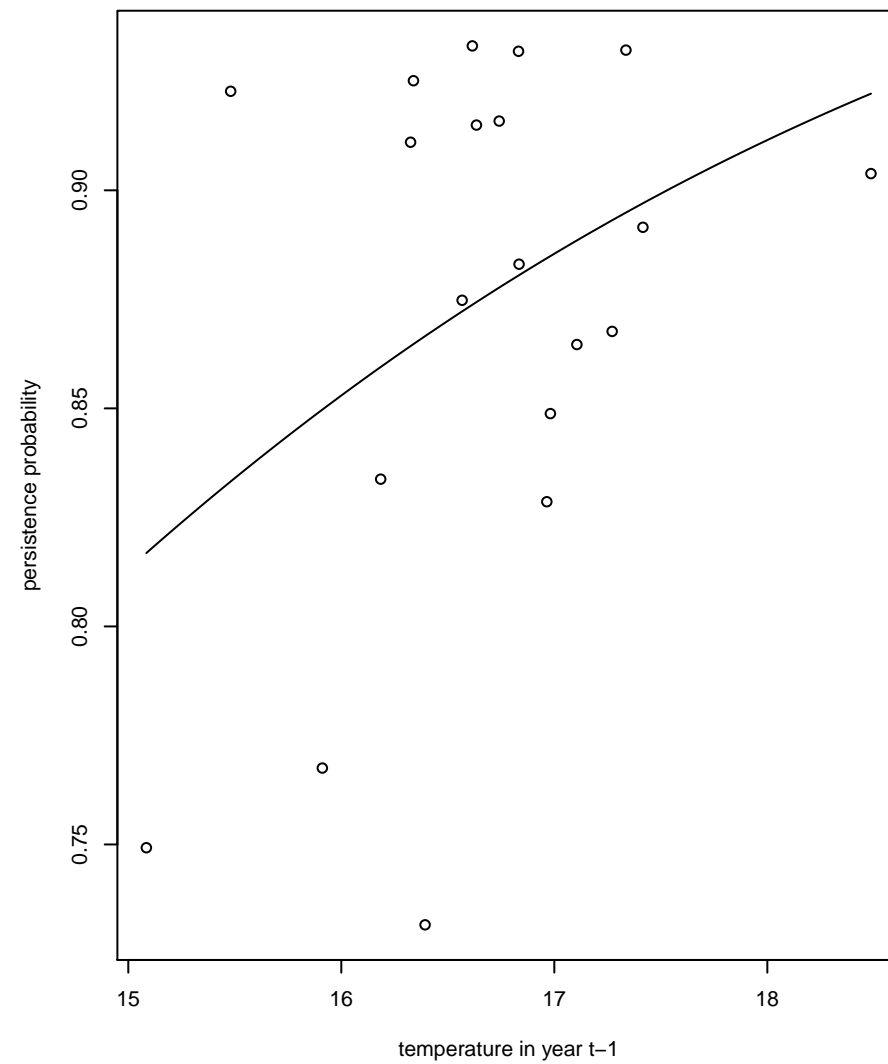

**Sympetrum vulgatum**

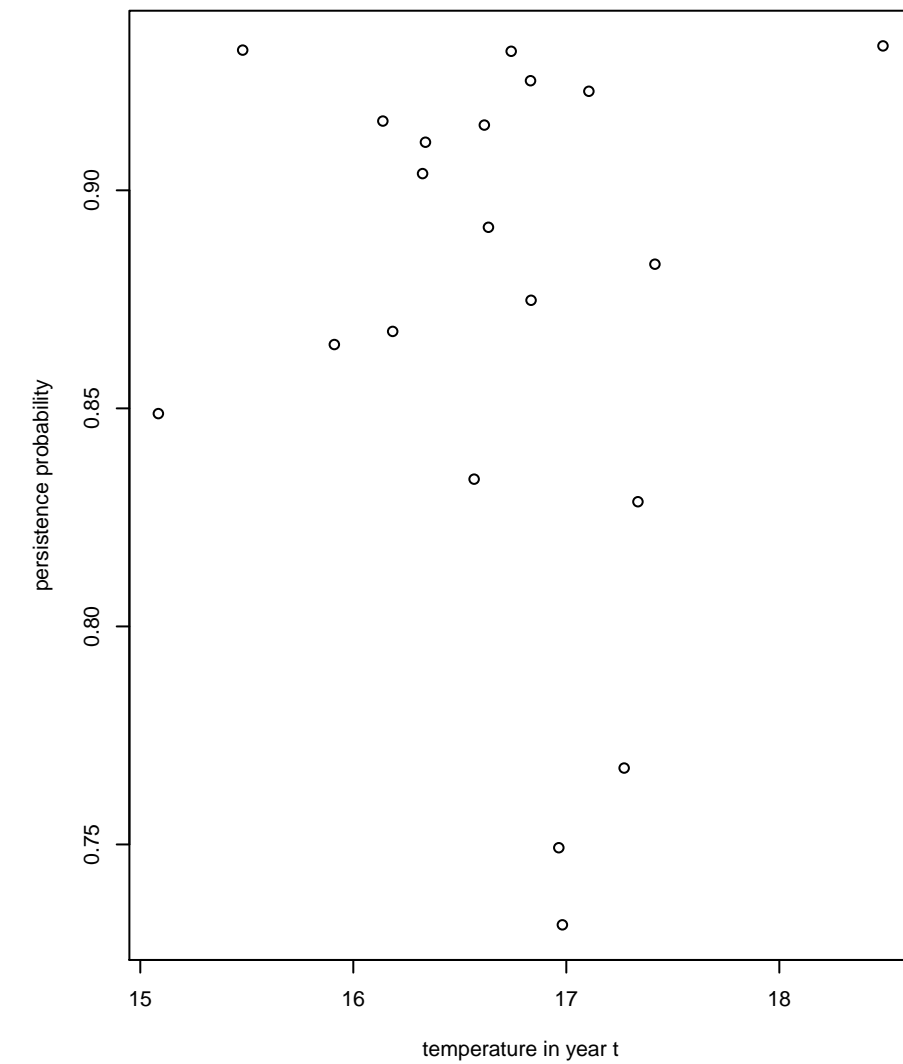

**Ischnura elegans**

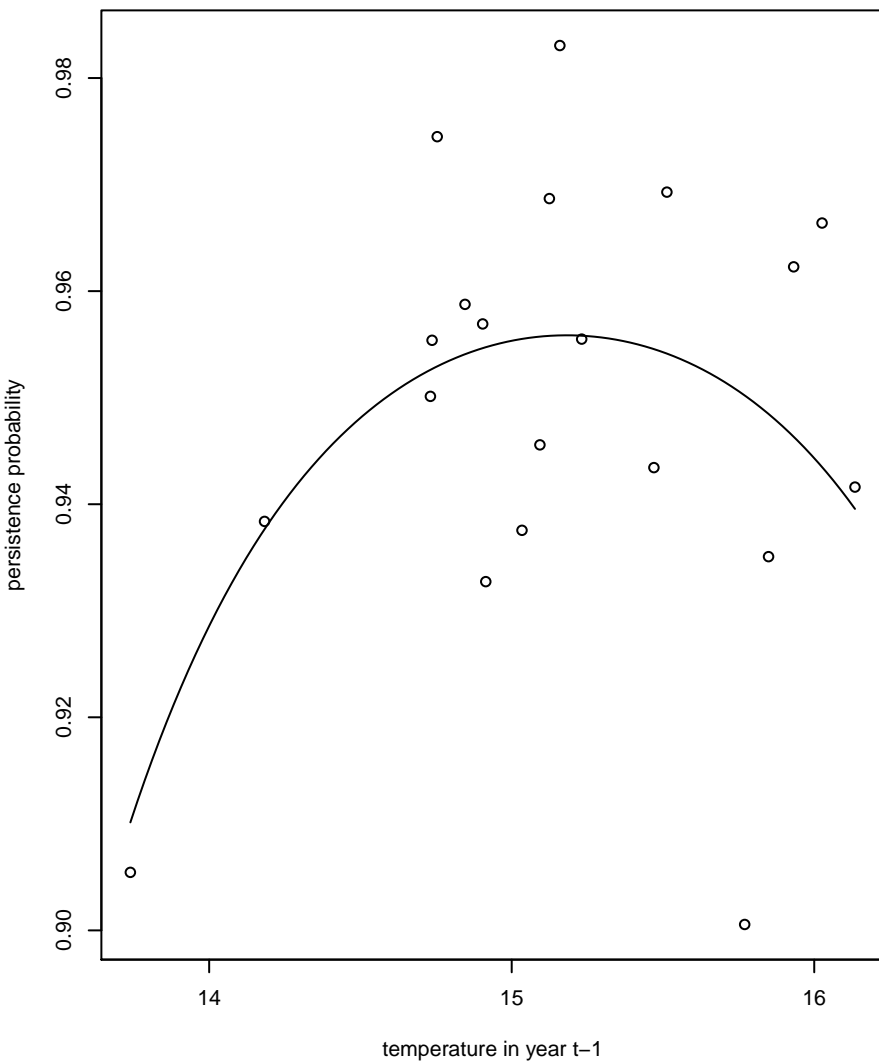

**Ischnura elegans**

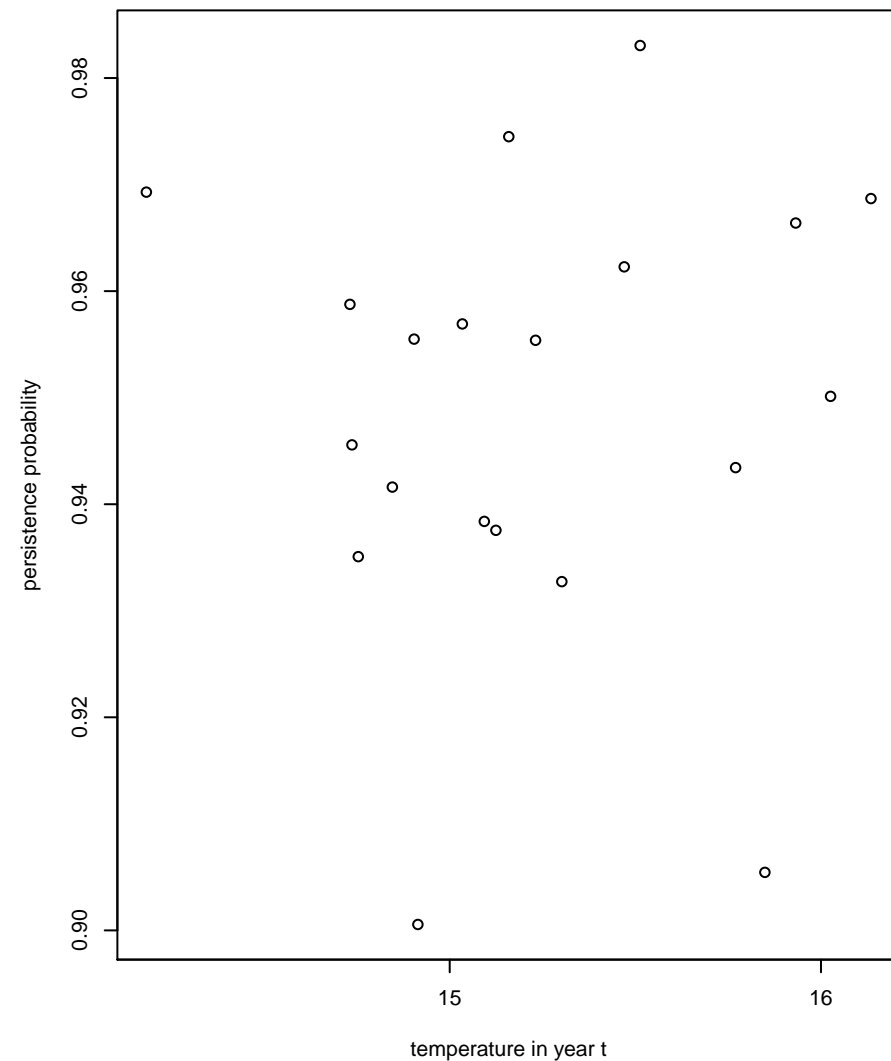

**Orthetrum cancellatum**

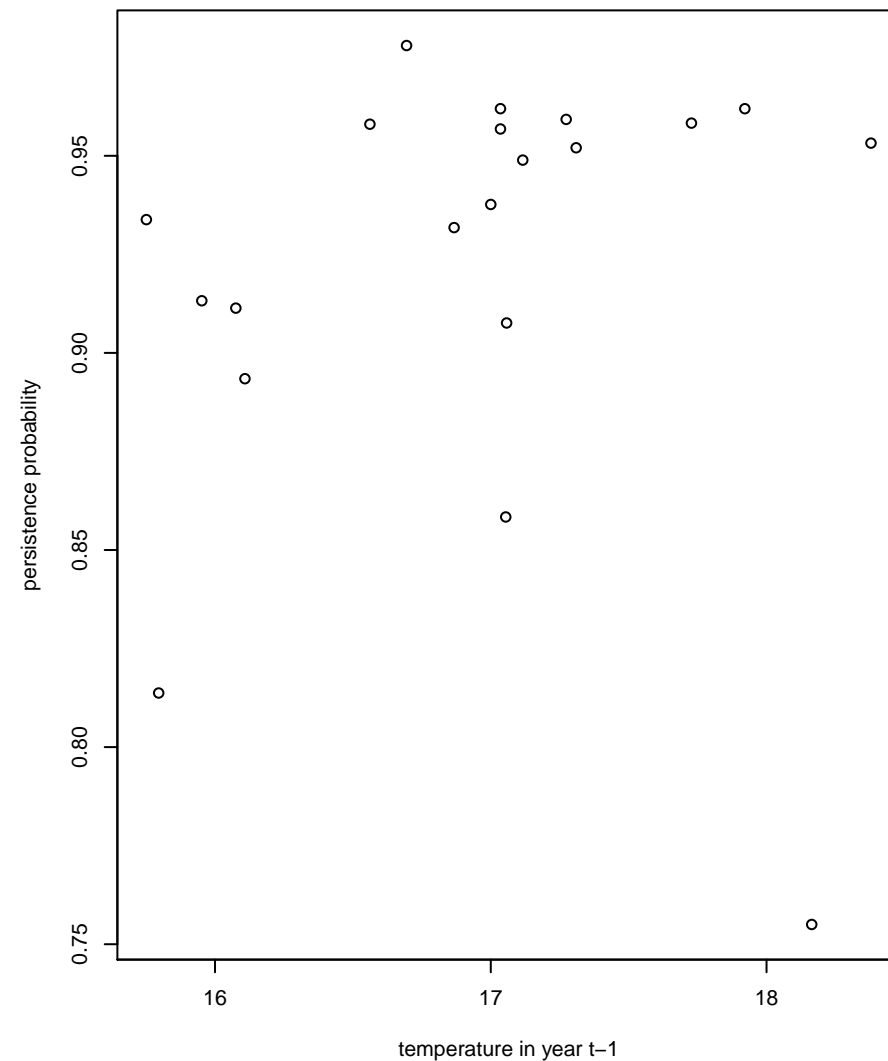

**Orthetrum cancellatum**

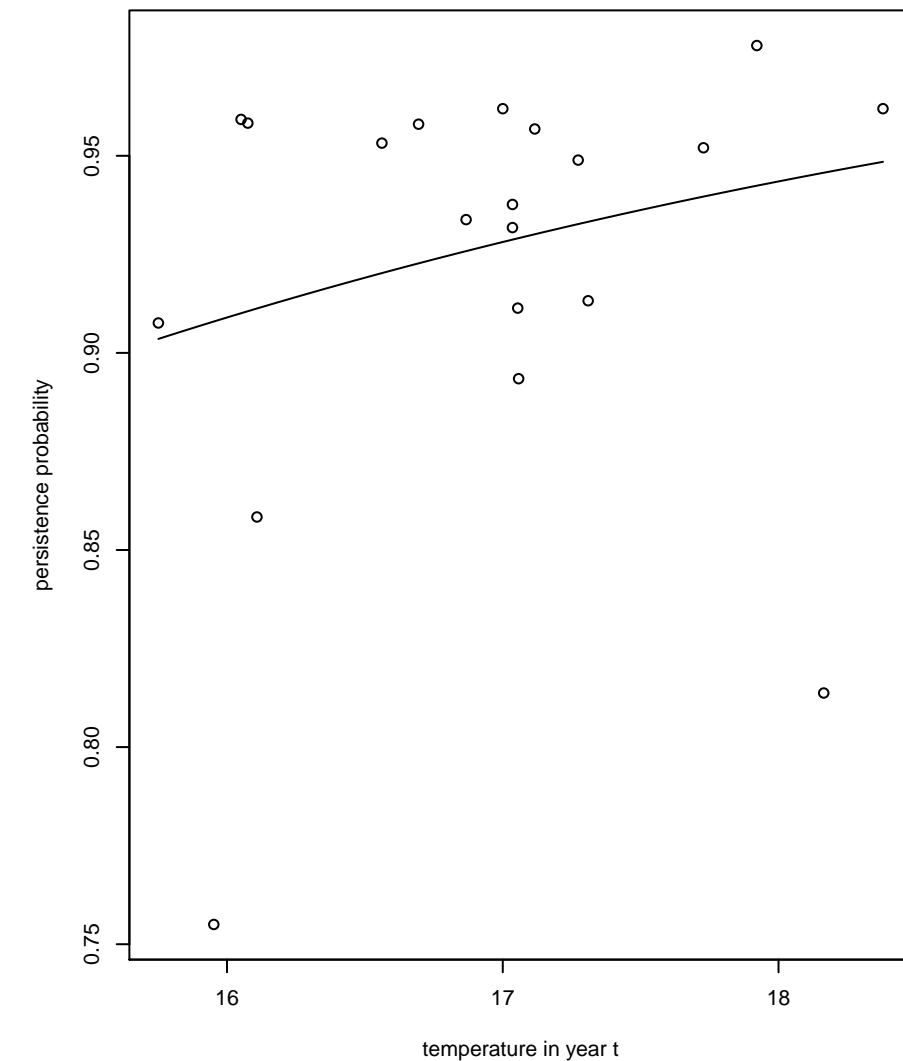

**Libellula quadrimaculata**

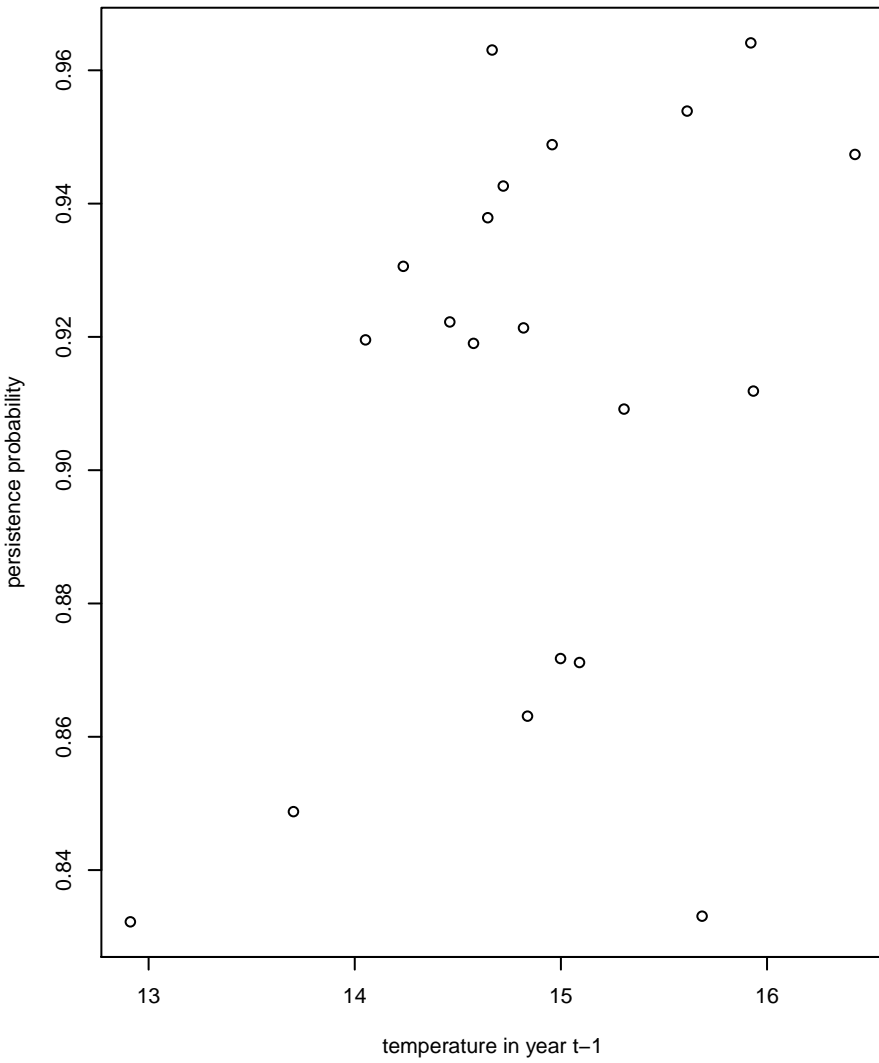

**Libellula quadrimaculata**

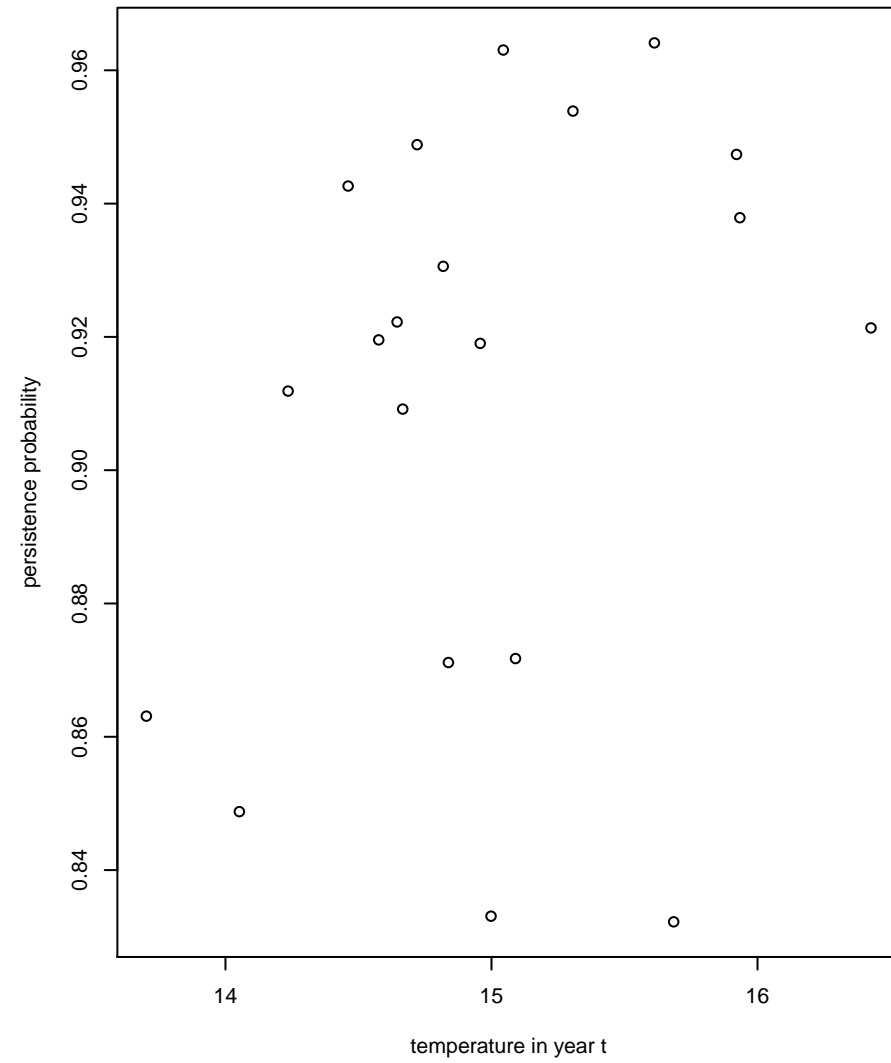

**Lestes sponsa**

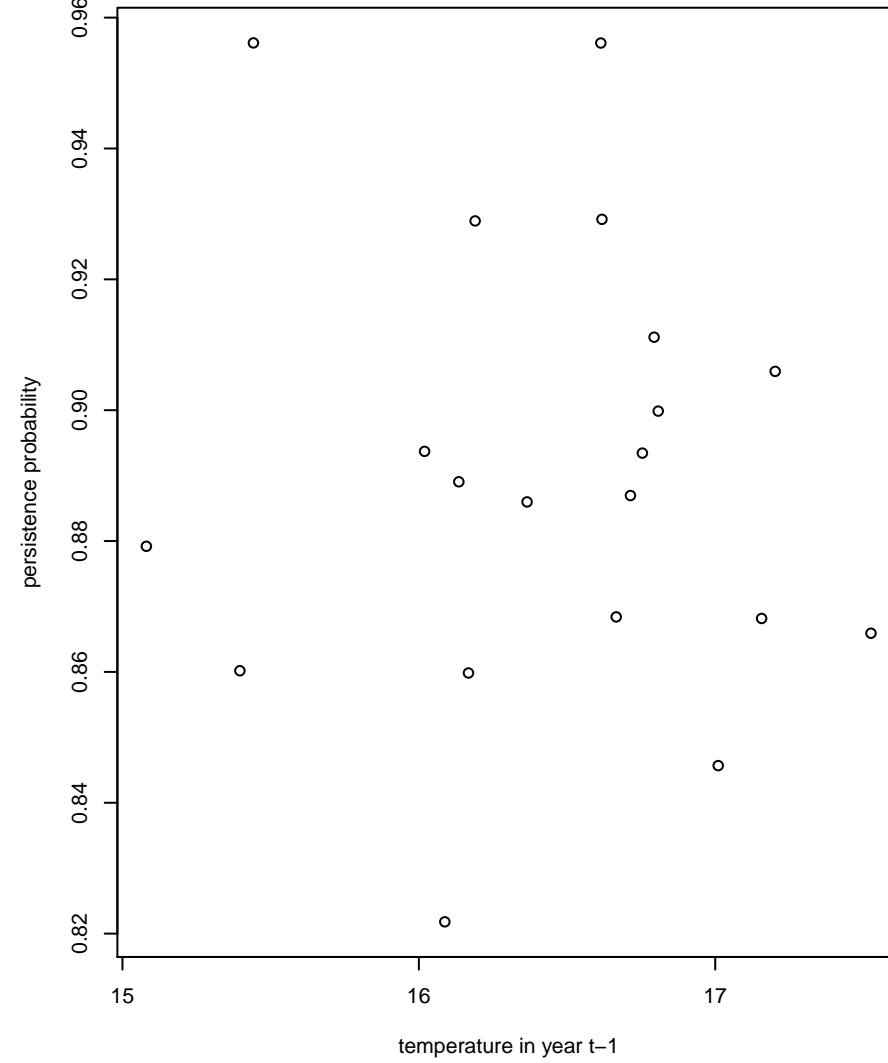

**Lestes sponsa**

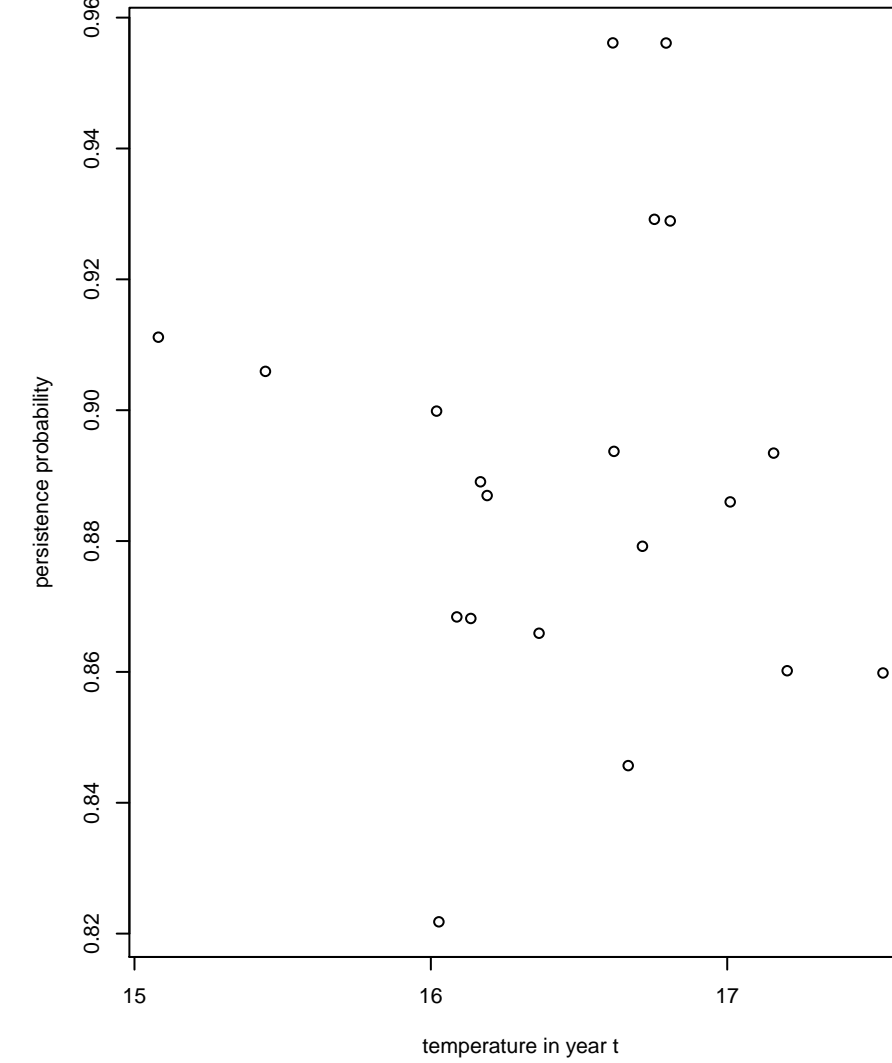

**Ceriagrion tenellum**

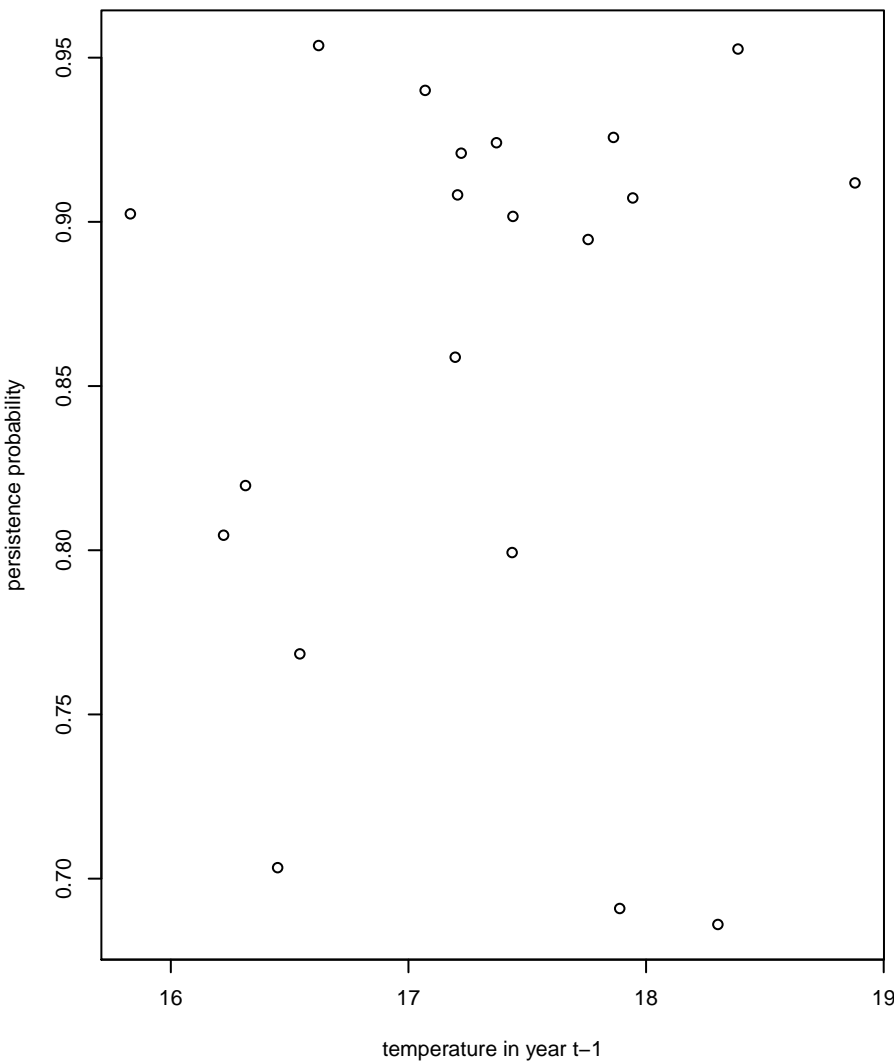

**Ceriagrion tenellum**

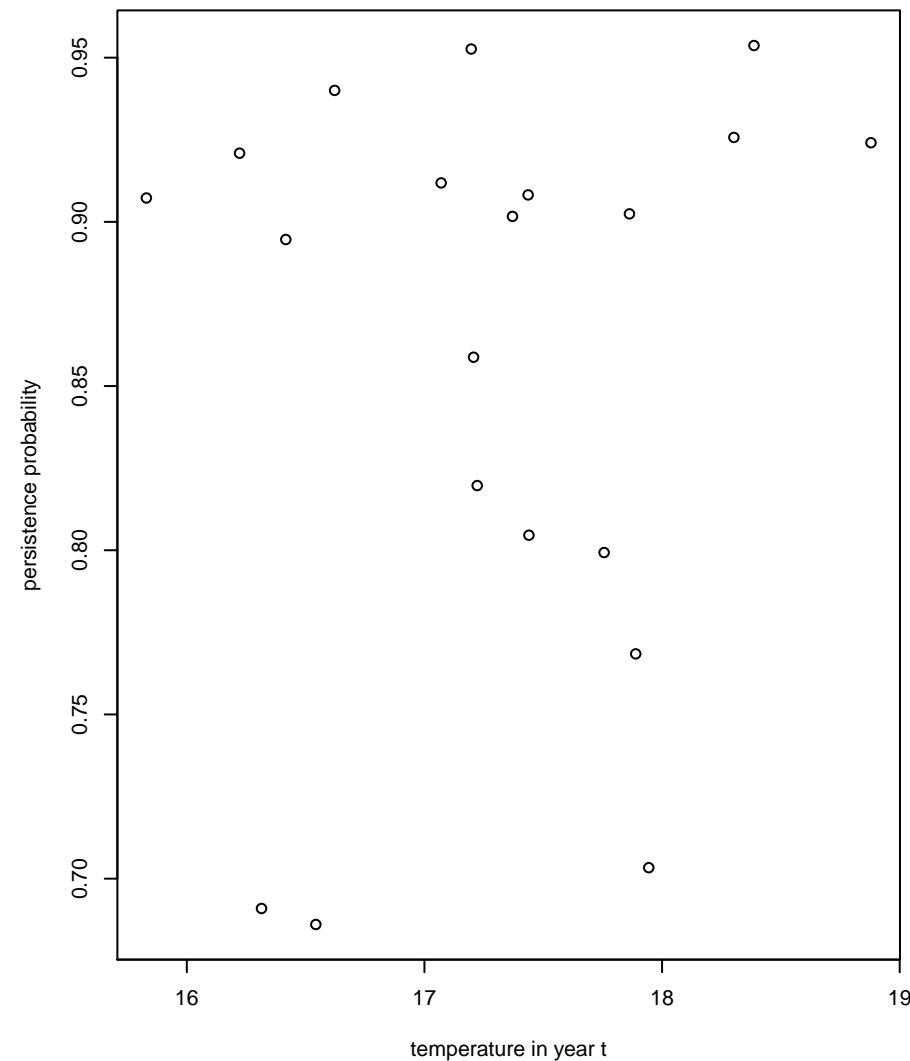

**Aeshna mixta**

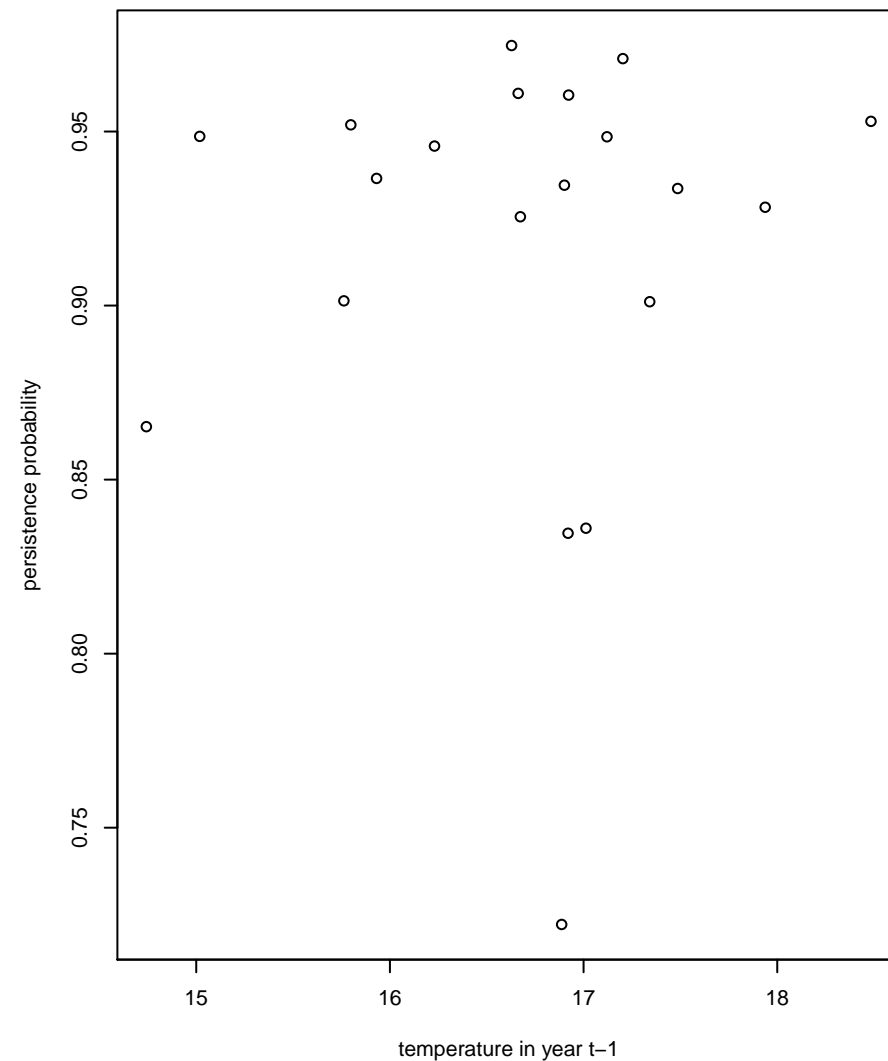

**Aeshna mixta**

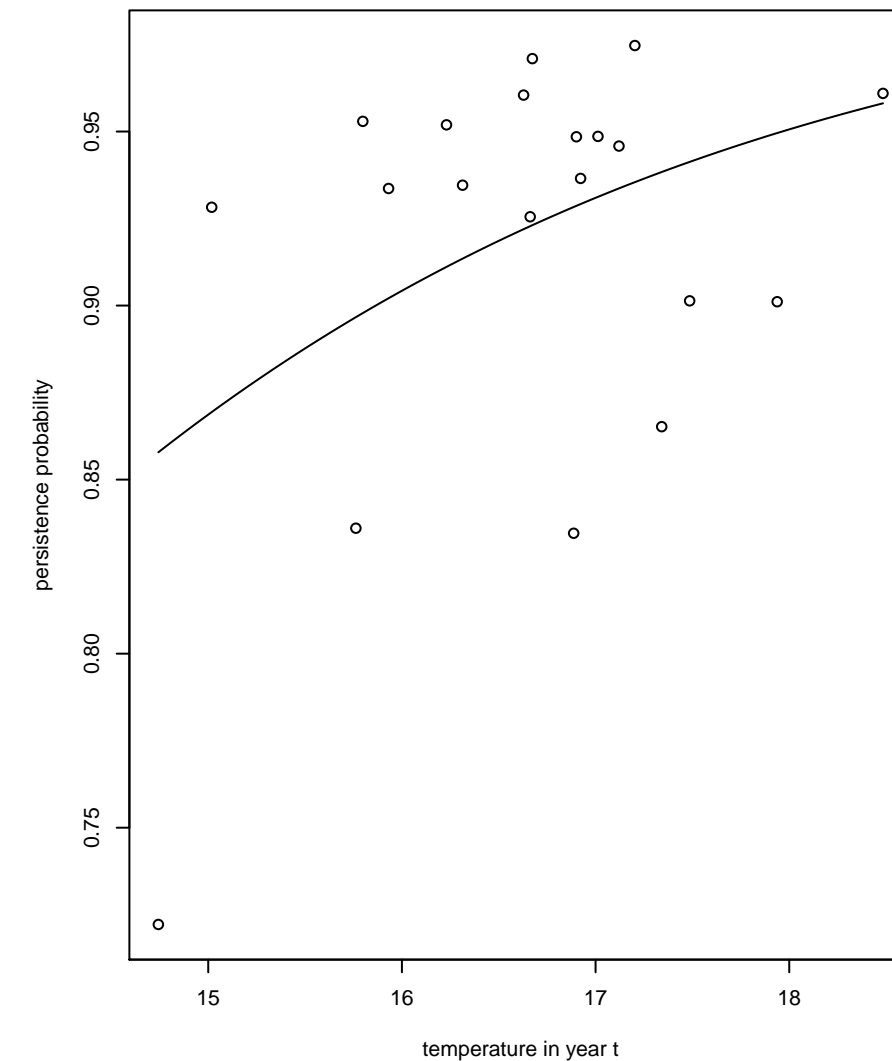

**Sympetrum sanguineum**

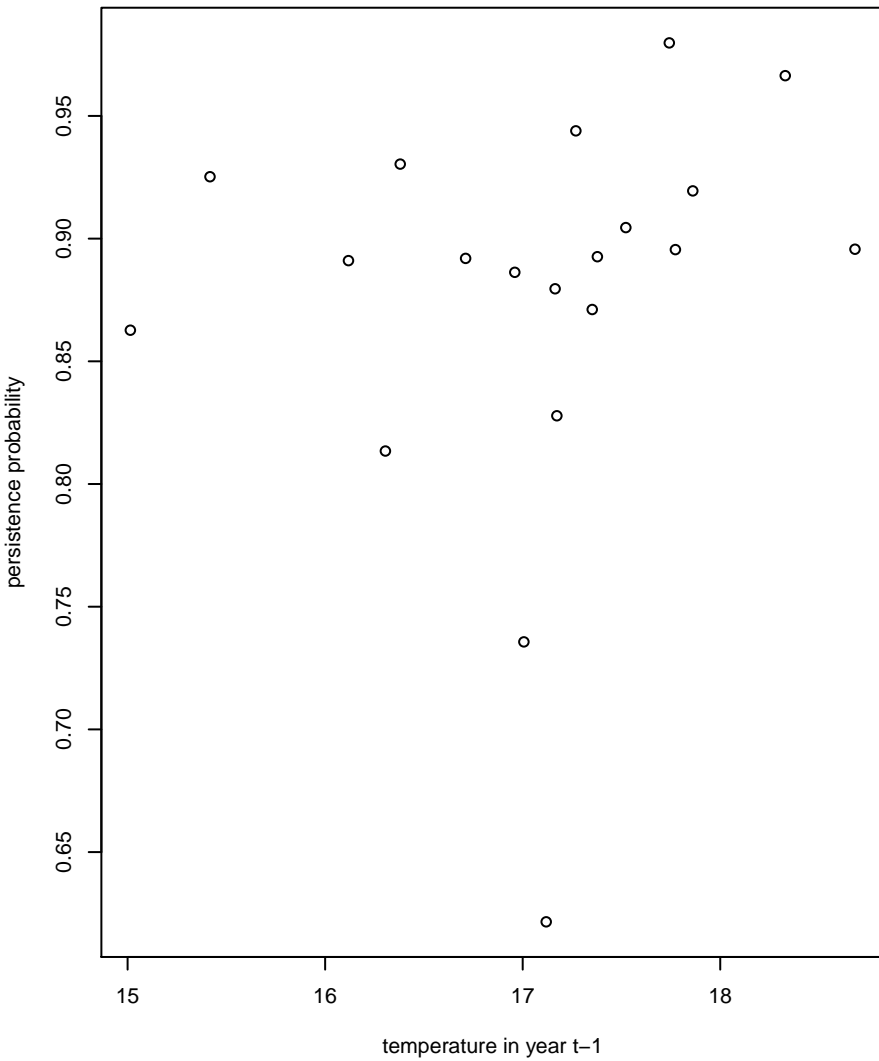

**Sympetrum sanguineum**

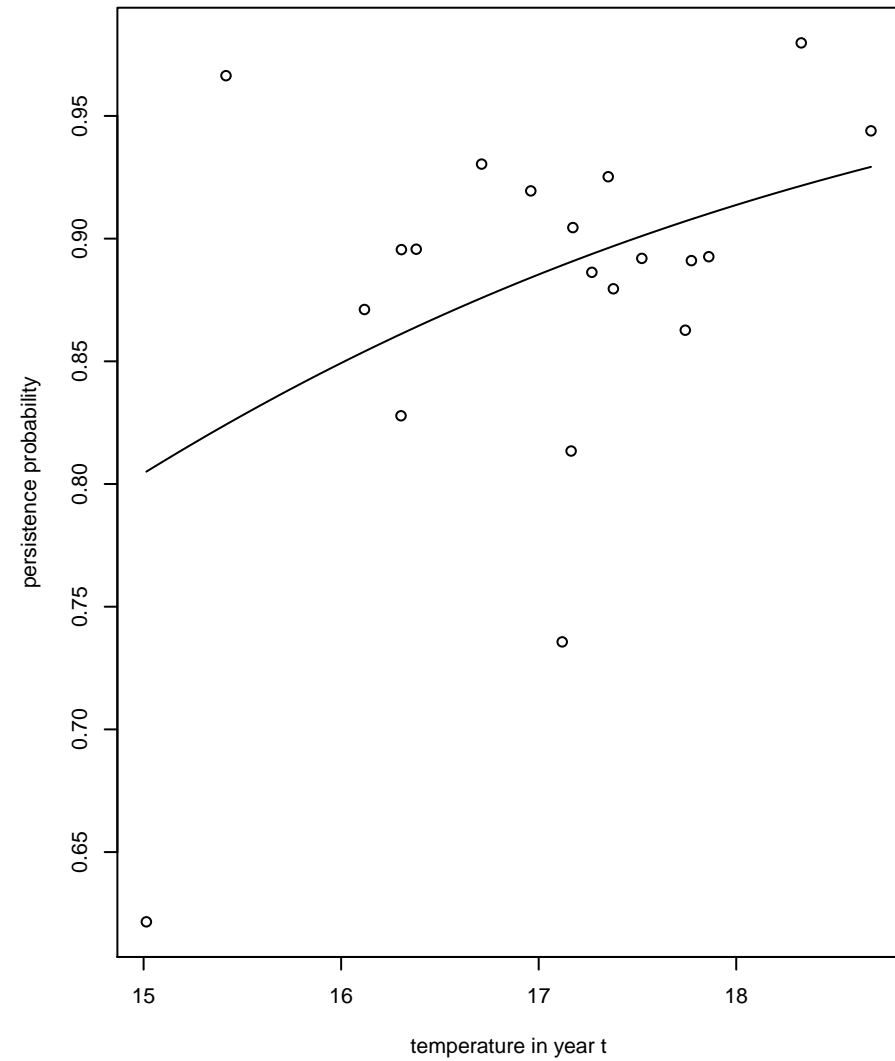

**Lestes viridis**

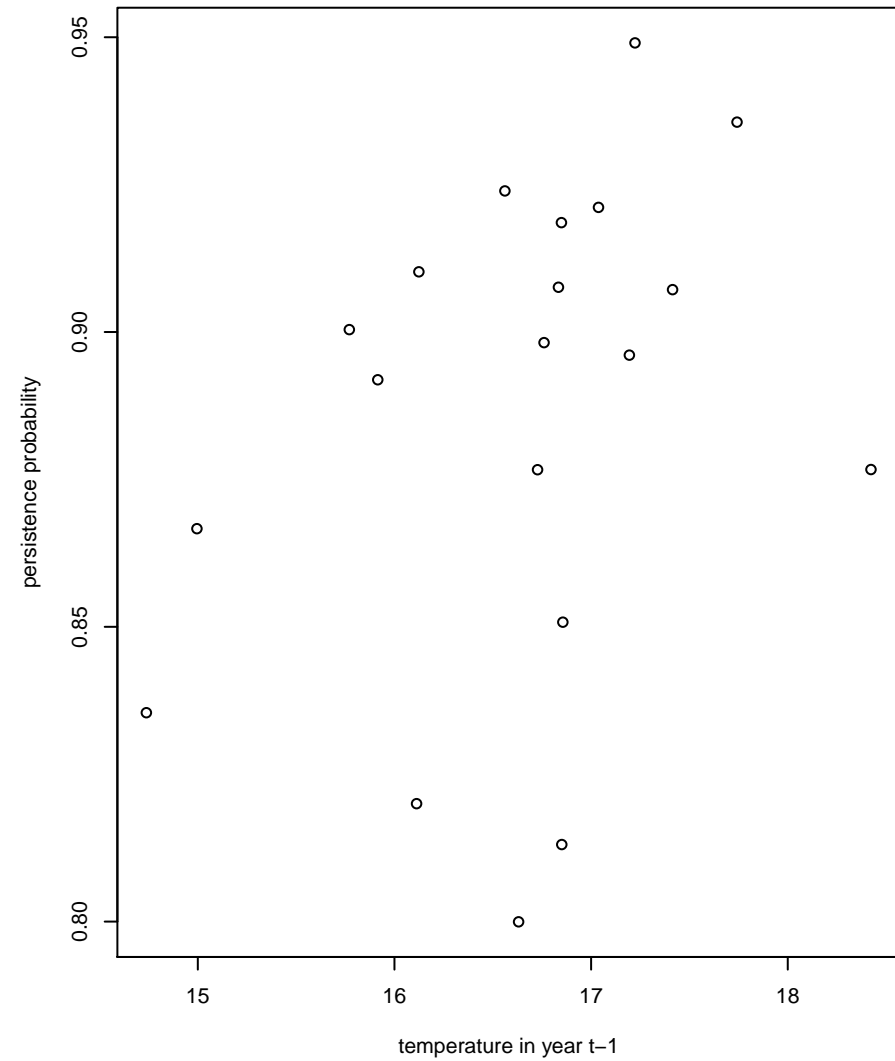

**Lestes viridis**

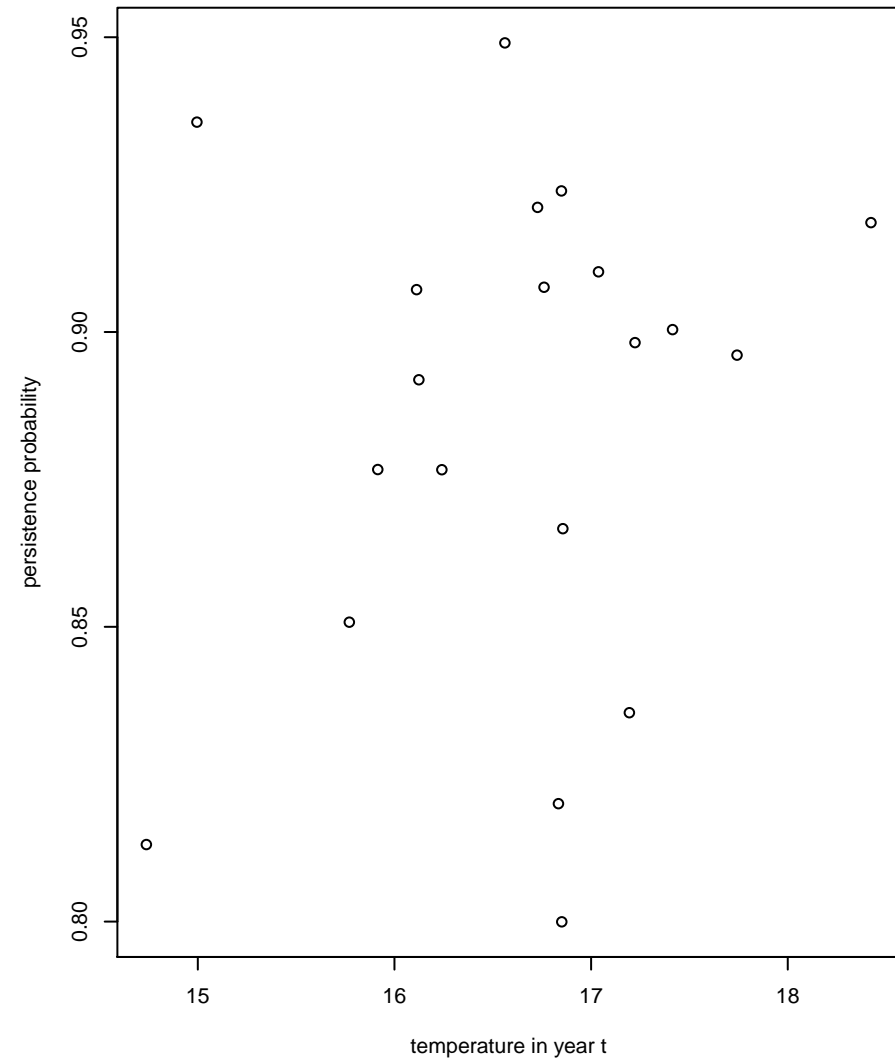

**Calopteryx splendens**

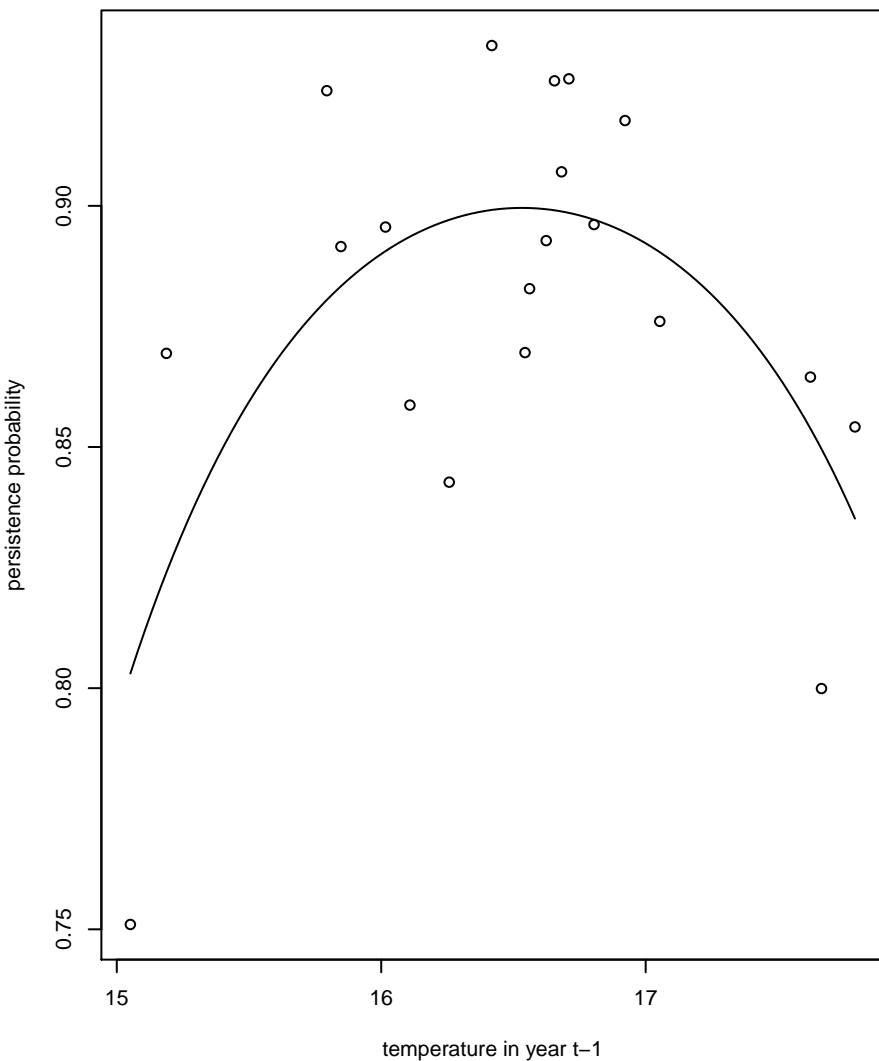

**Calopteryx splendens**

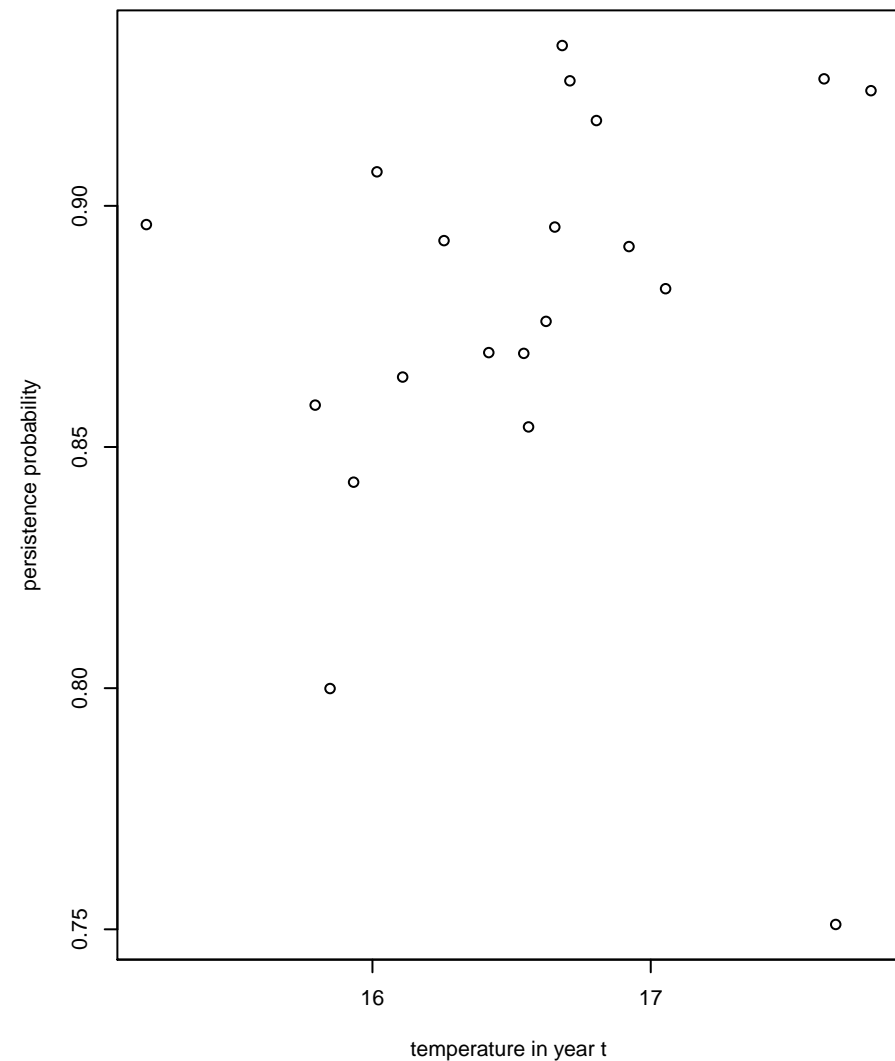

**Sympetrum danae**

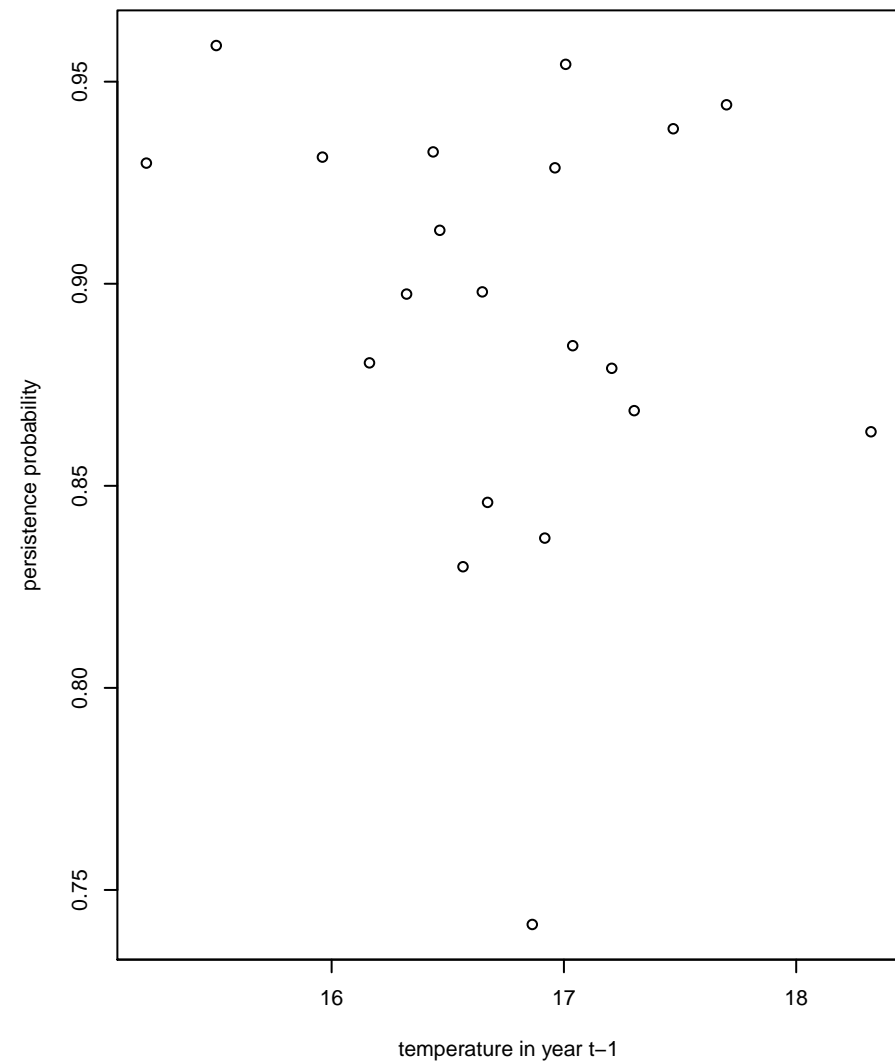

**Sympetrum danae**

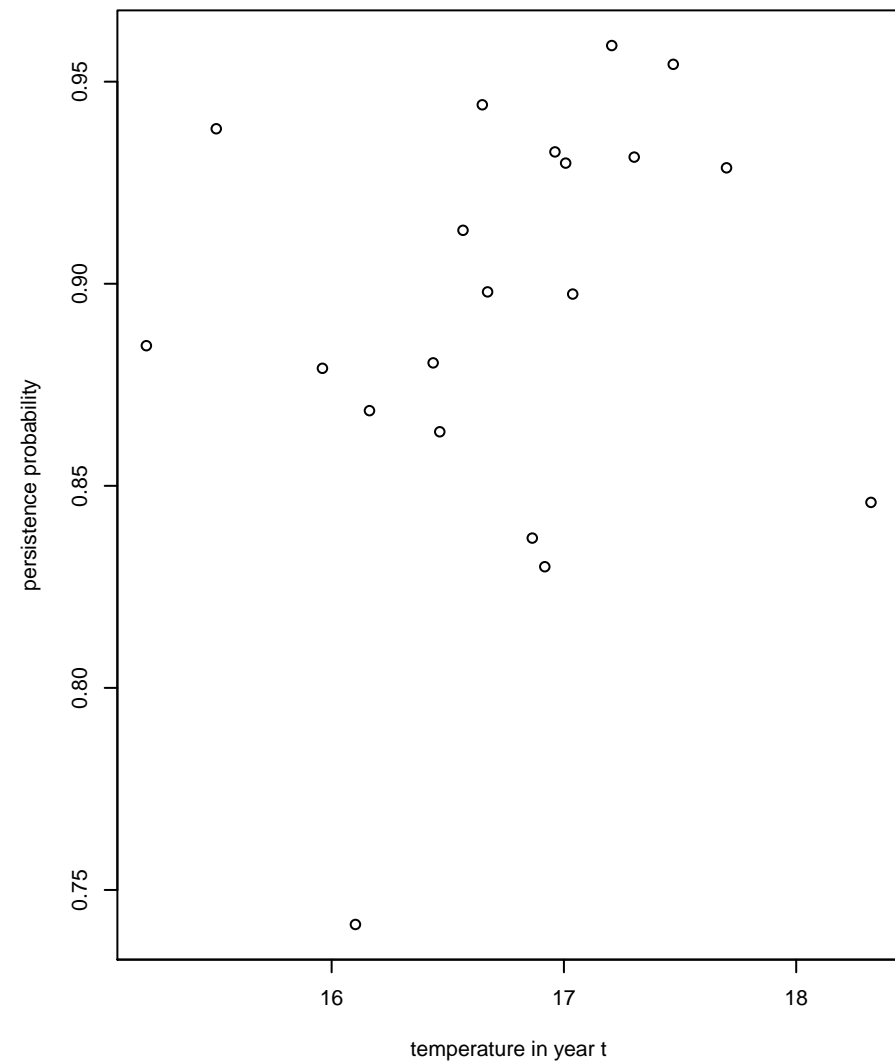

**Leucorrhinia rubicunda**

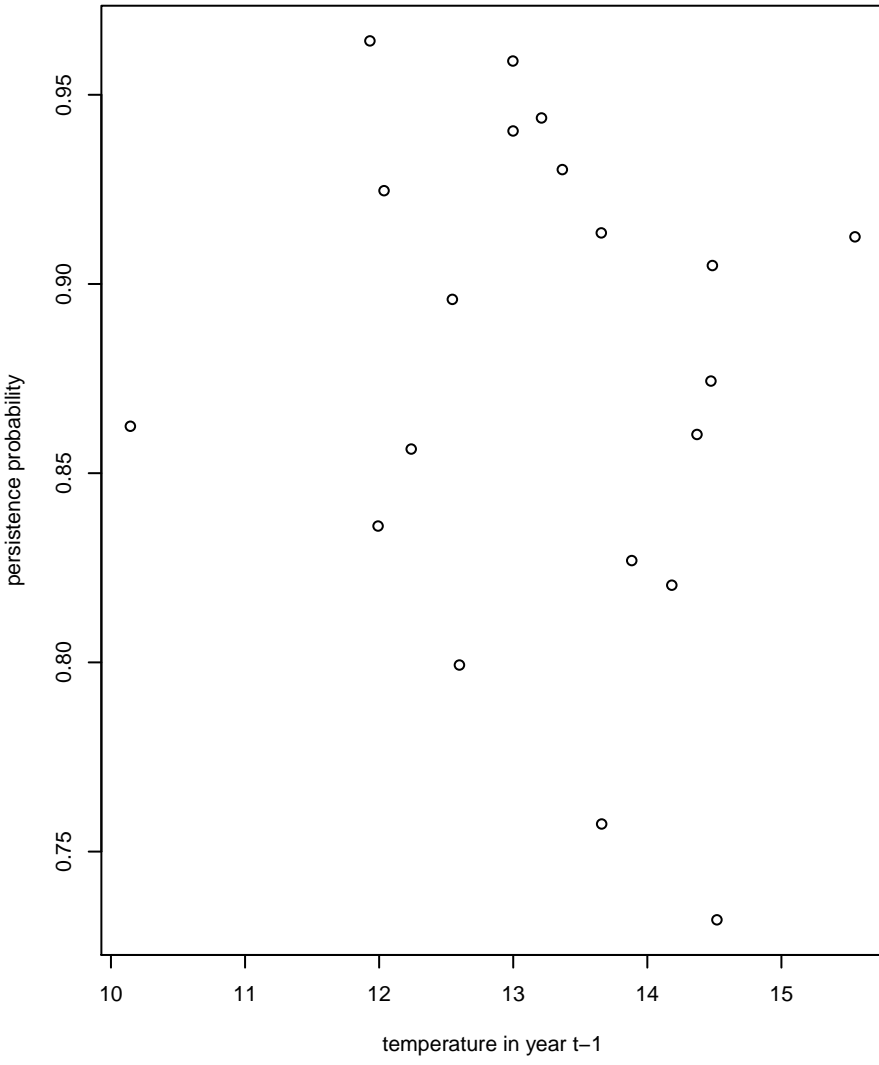

**Leucorrhinia rubicunda**

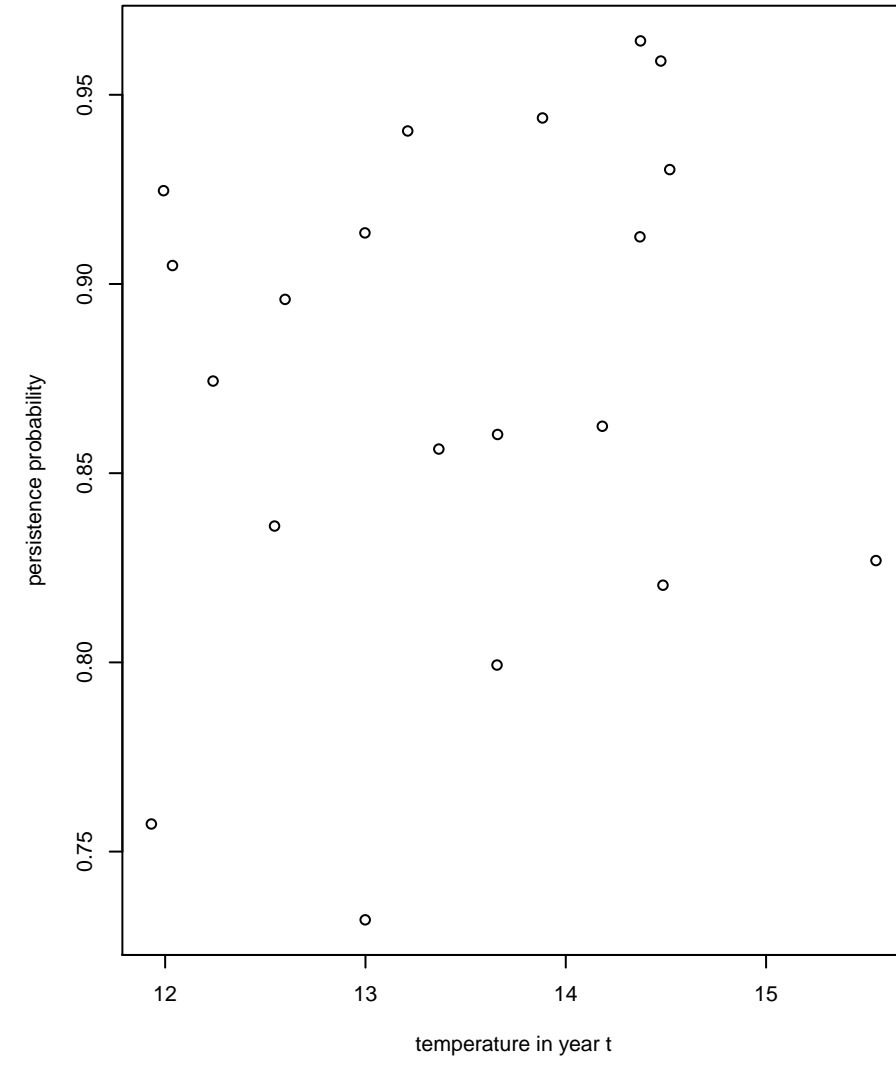

**Enallagma cyathigerum**

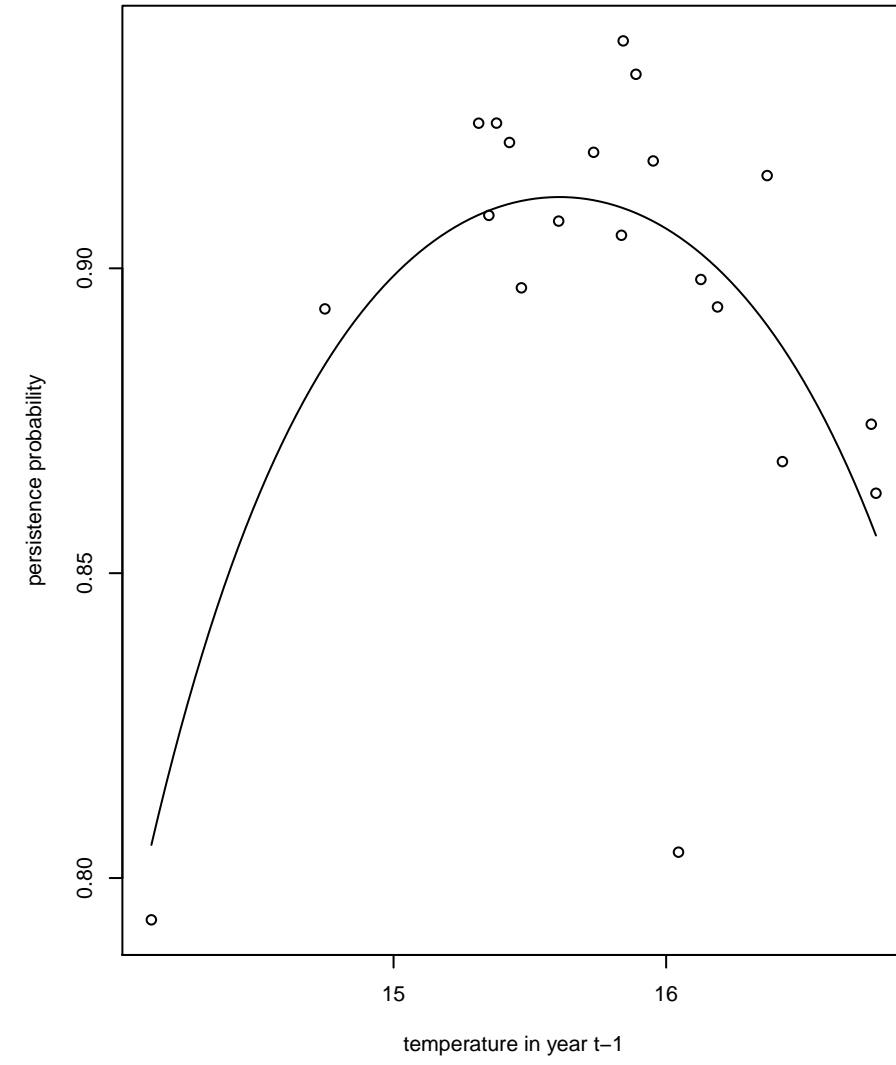

**Enallagma cyathigerum**

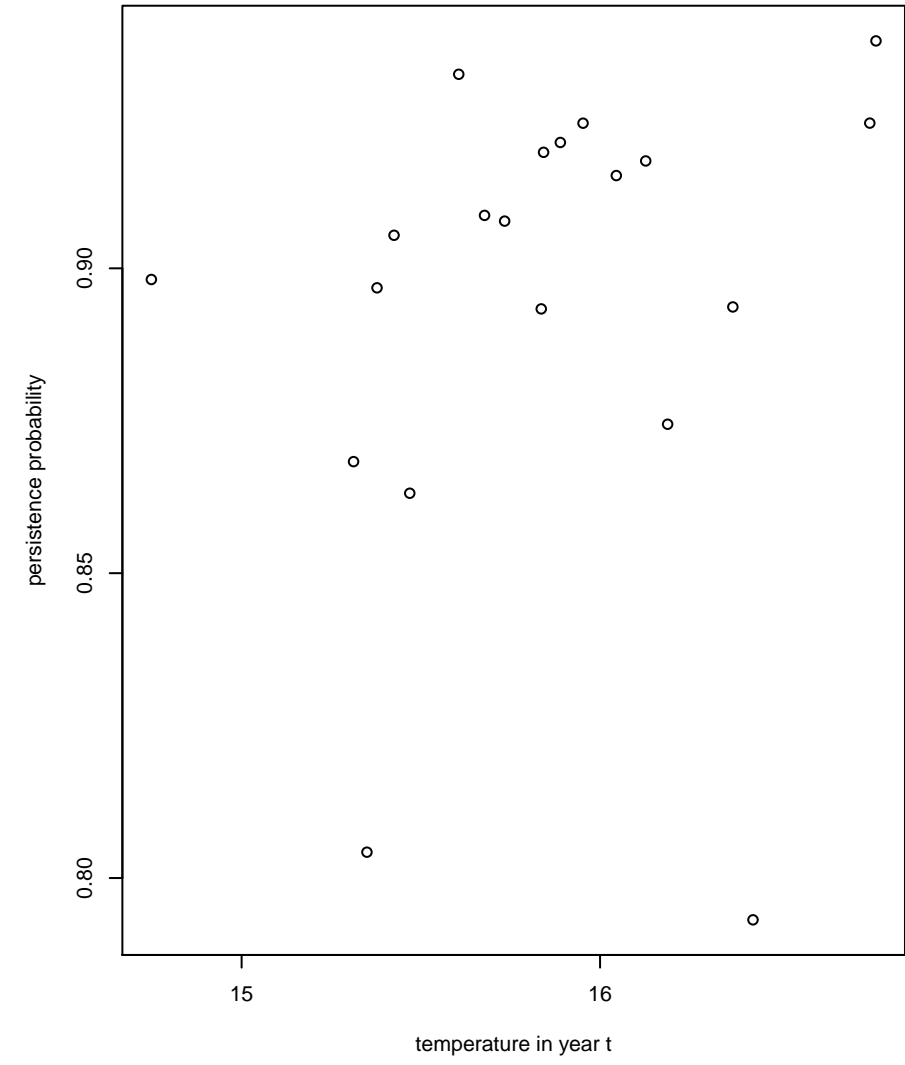

**Calopteryx virgo**

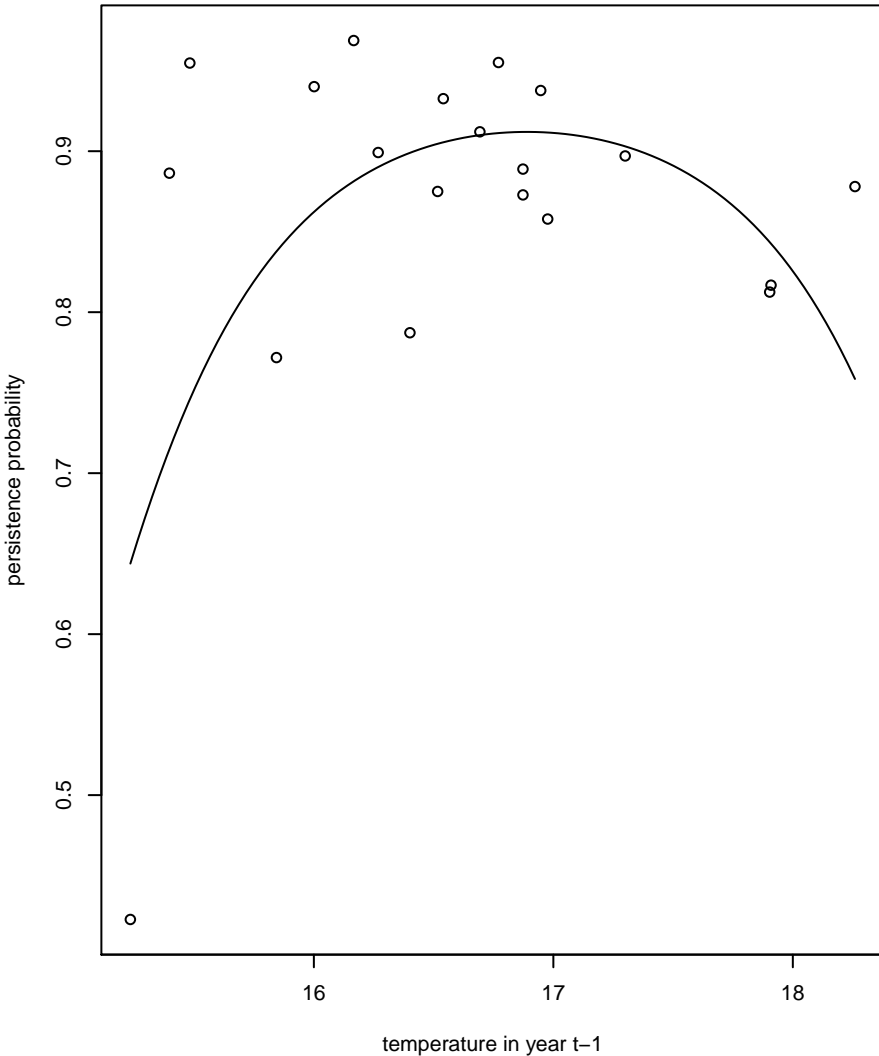

**Calopteryx virgo**

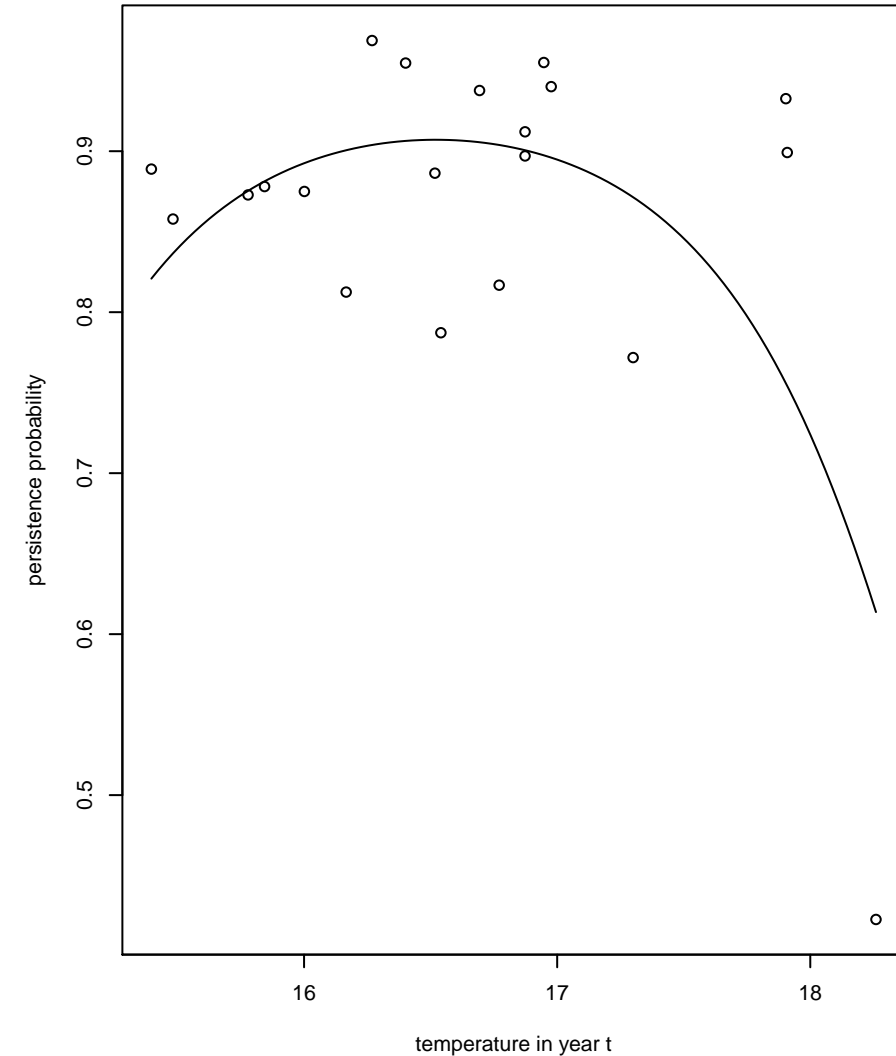

**Ischnura pumilio**

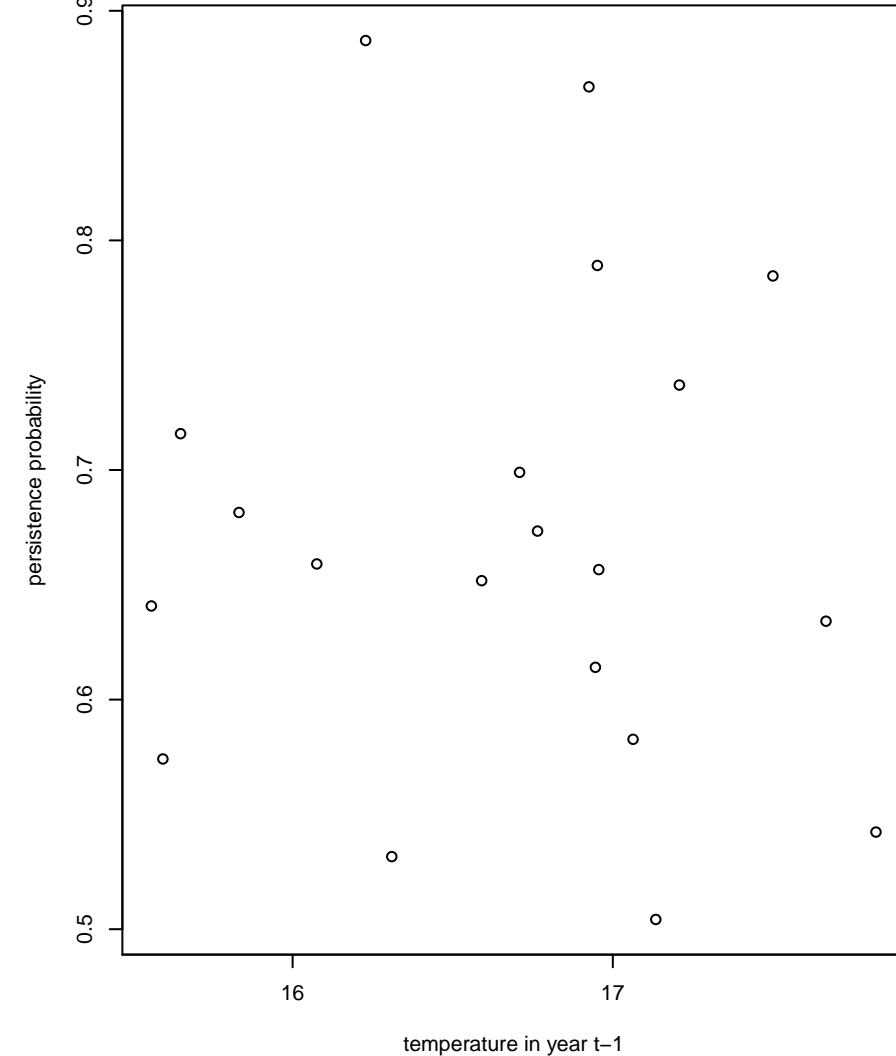

**Ischnura pumilio**

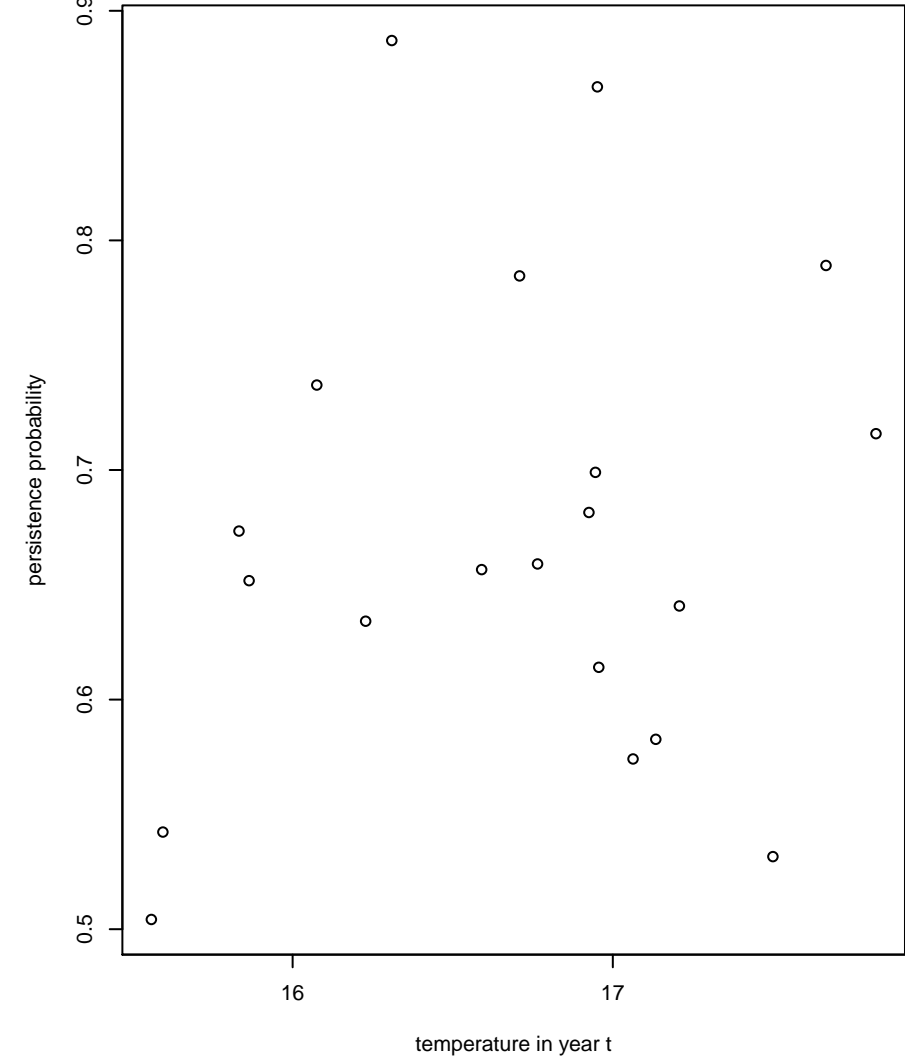

**Aeshna isoceles**

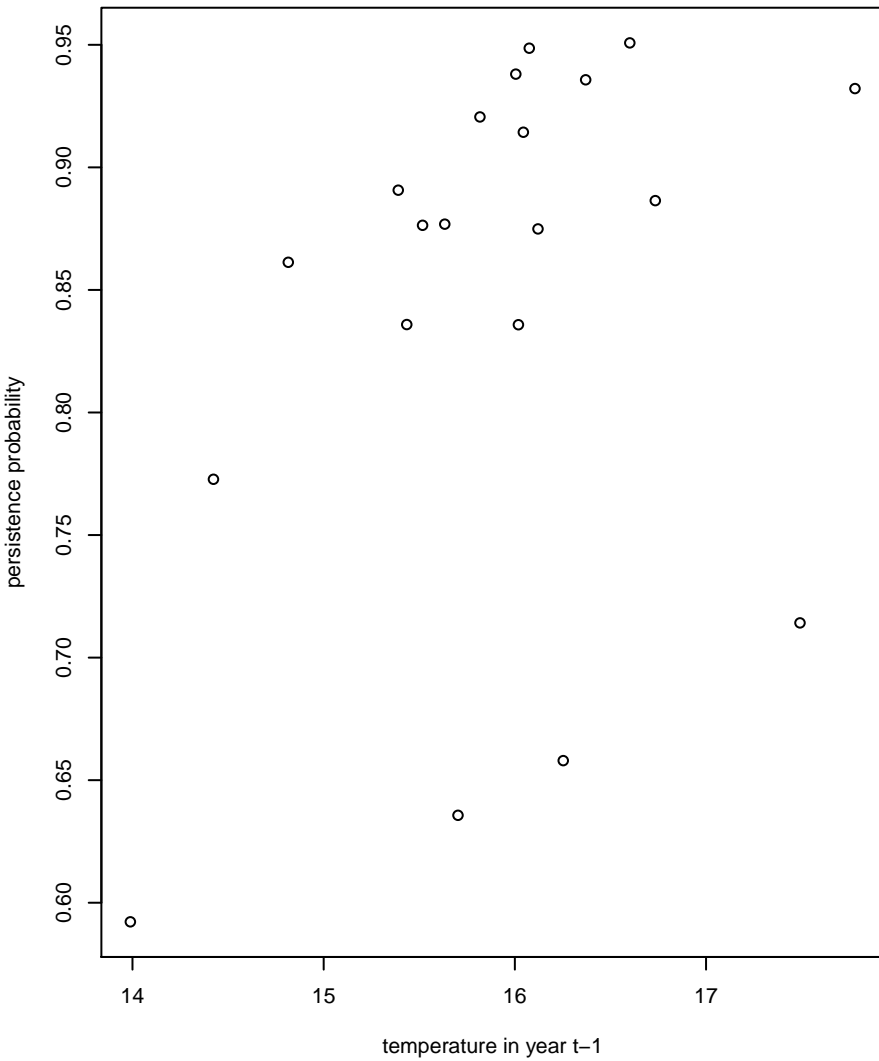

**Aeshna isoceles**

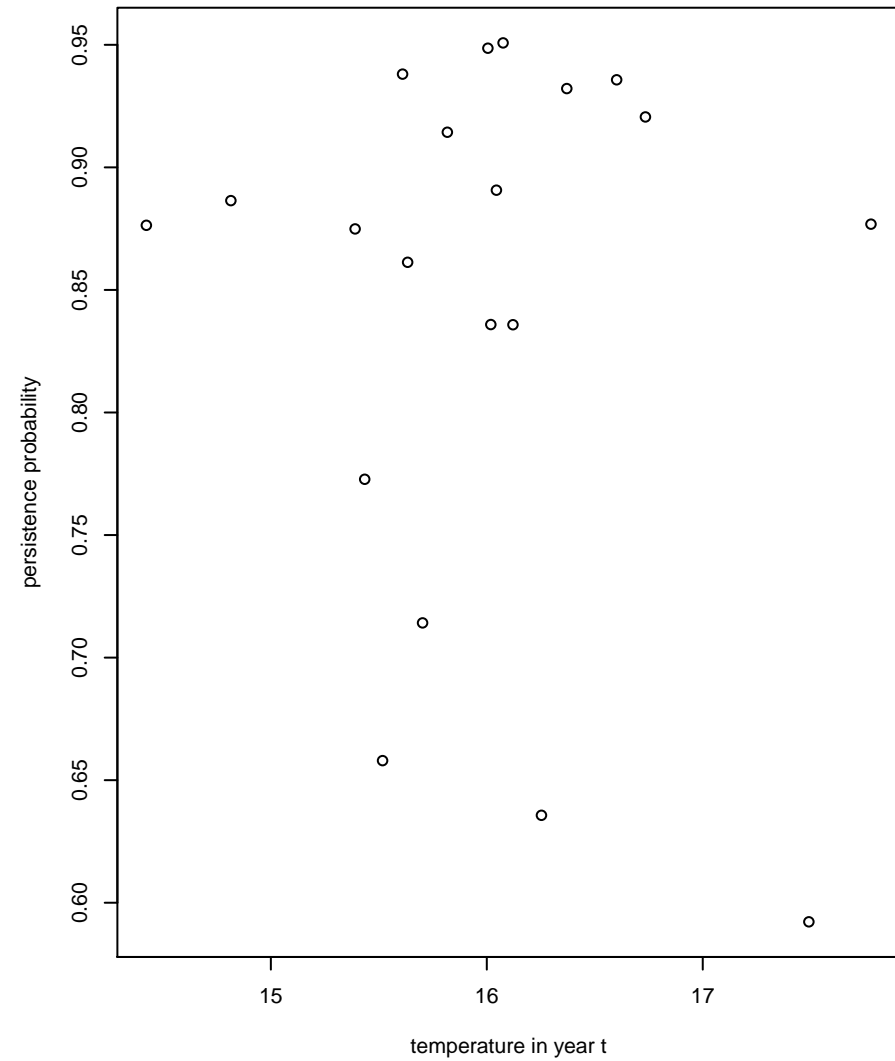

**Leucorrhinia dubia**

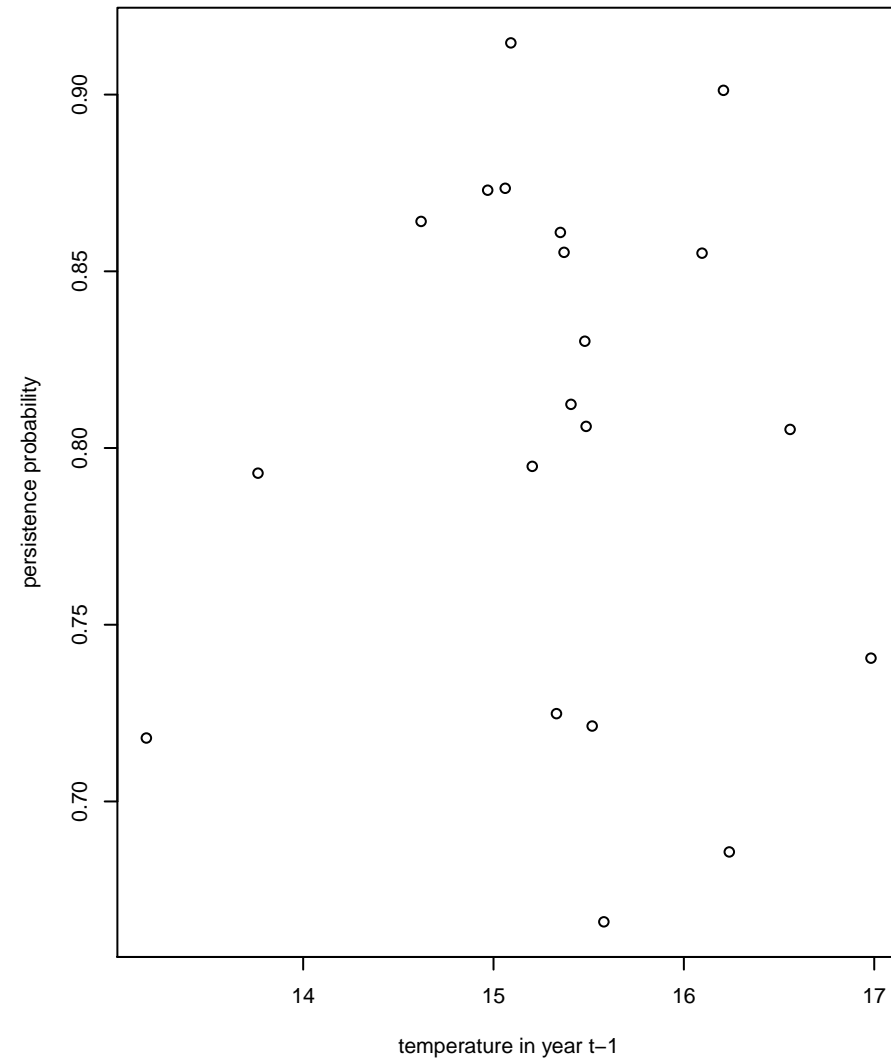

**Leucorrhinia dubia**

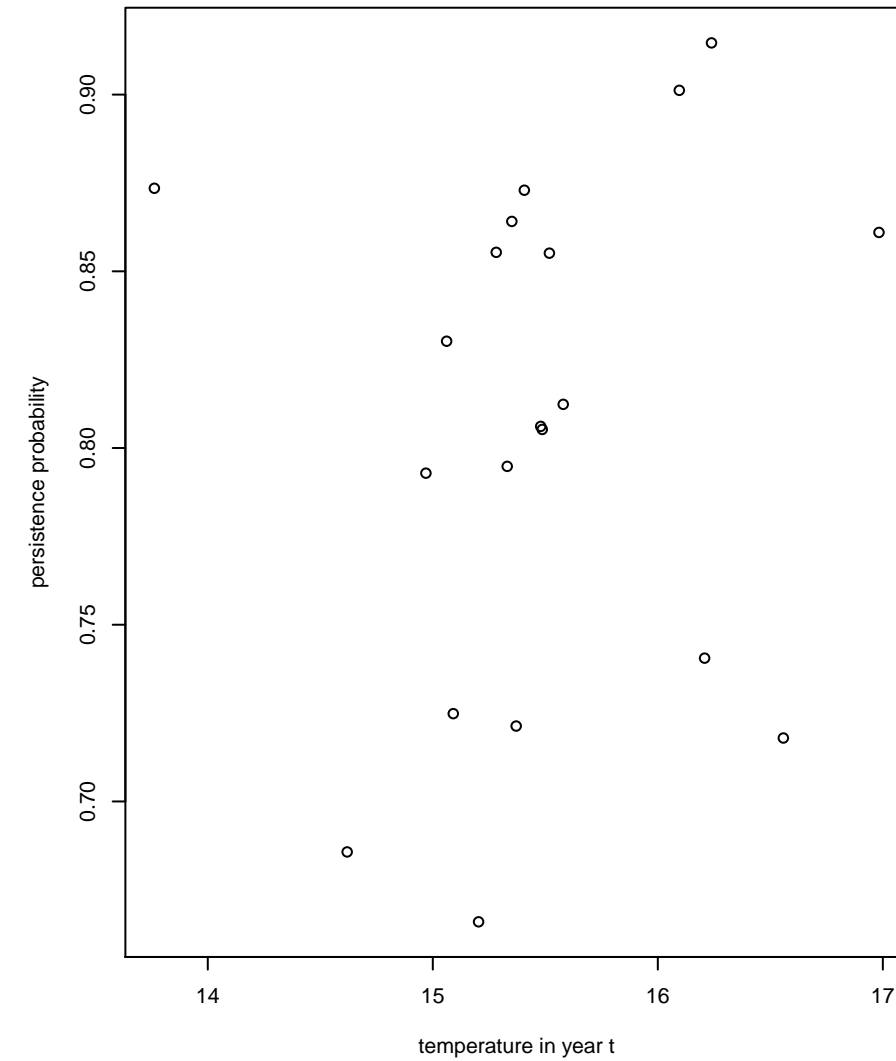

**Aeshna grandis**

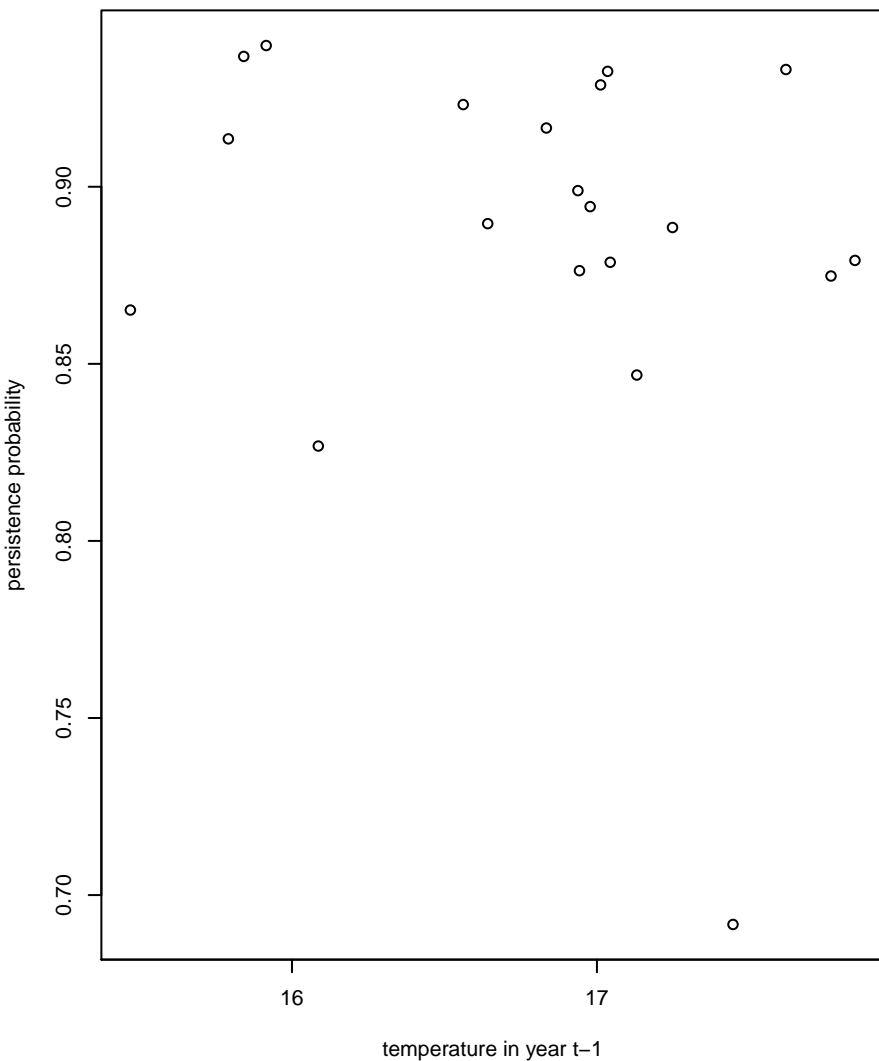

**Aeshna grandis**

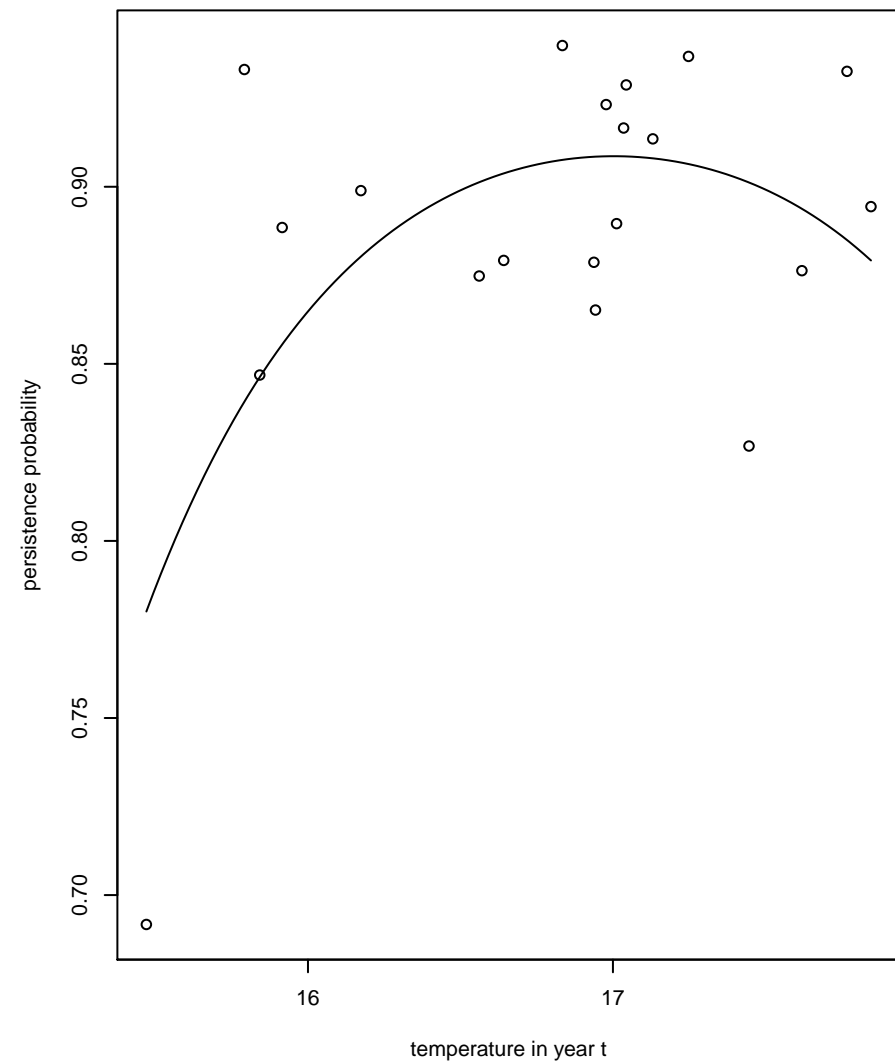

**Aeshna cyanea**

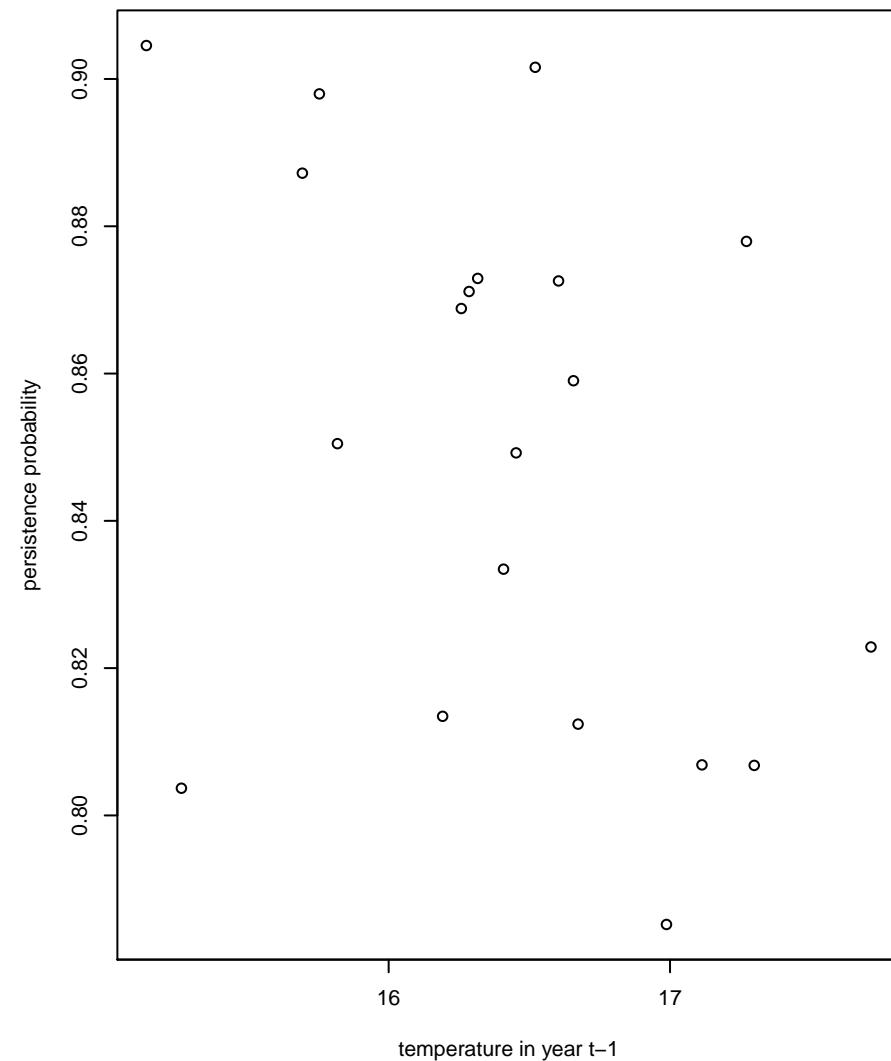

**Aeshna cyanea**

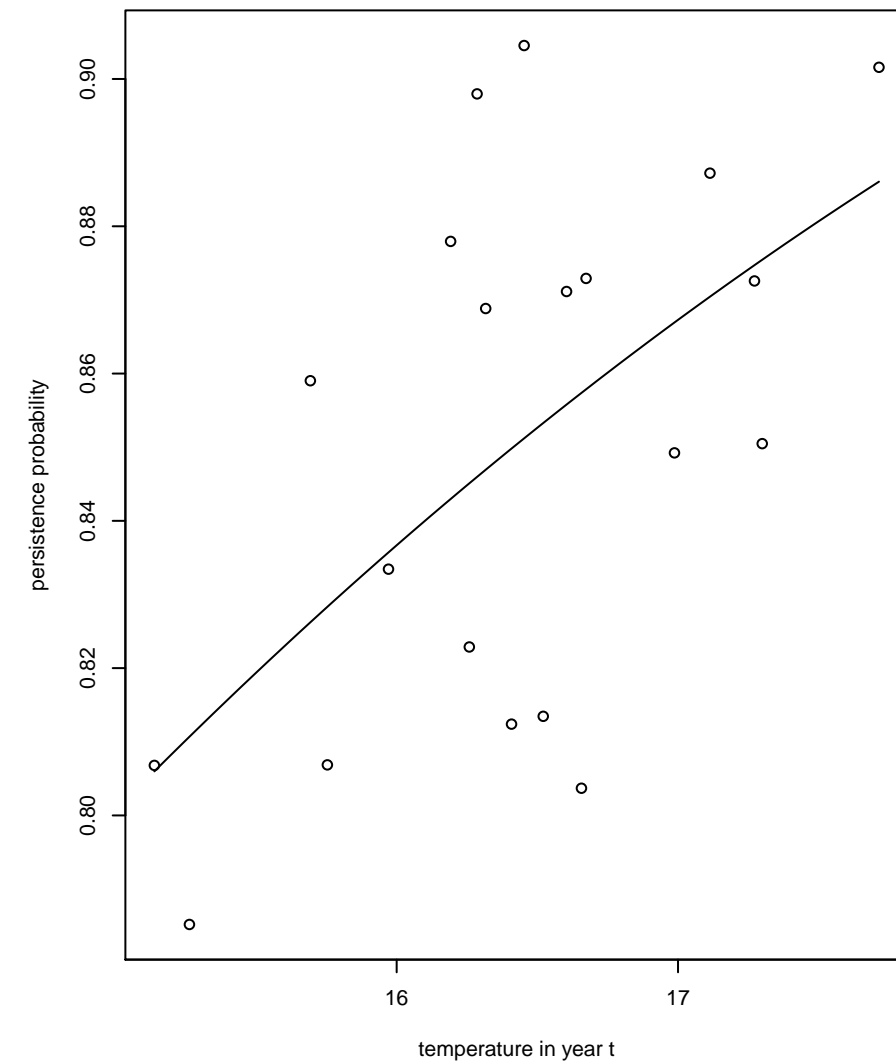



**Lestes virens**

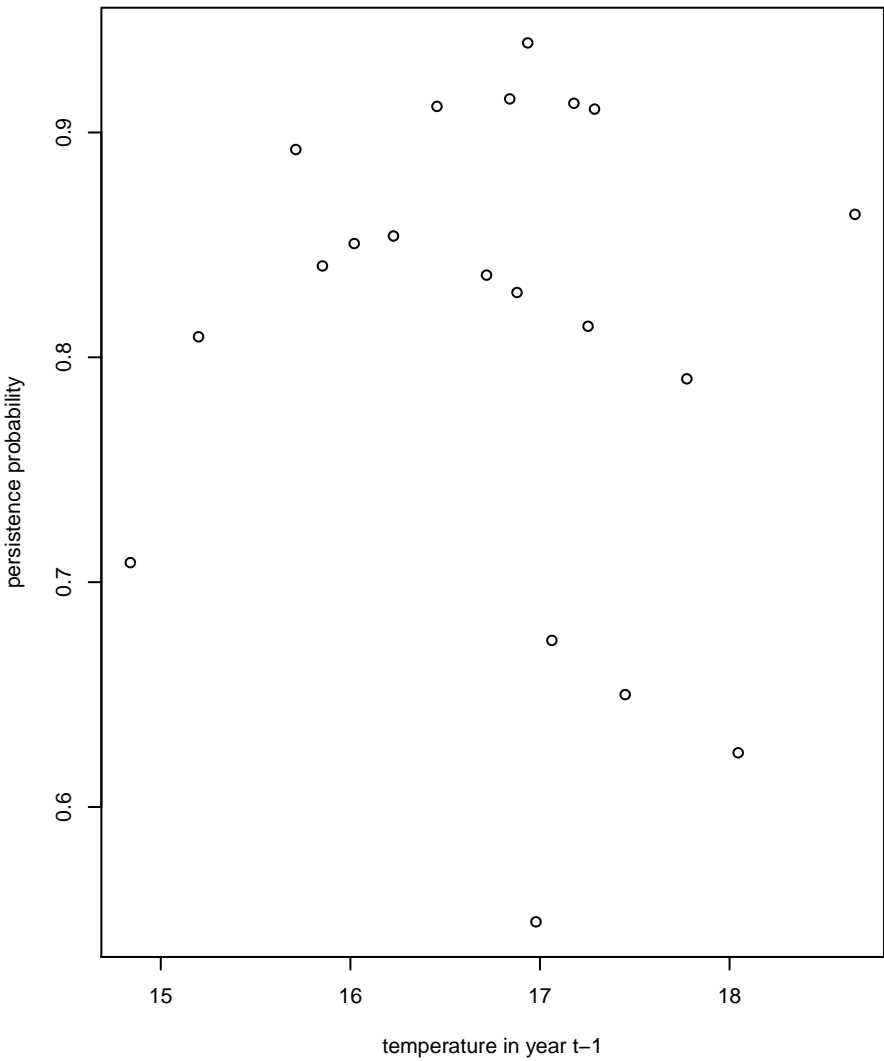

**Lestes virens**

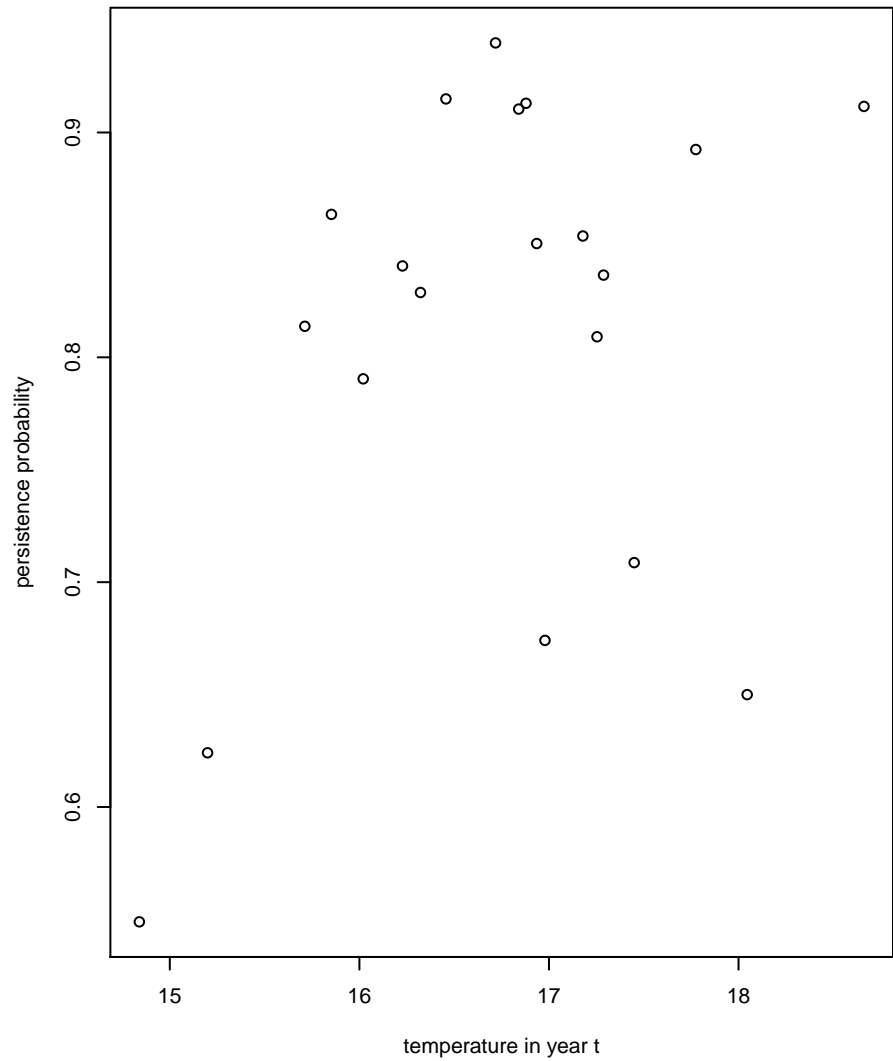

**Libellula depressa**

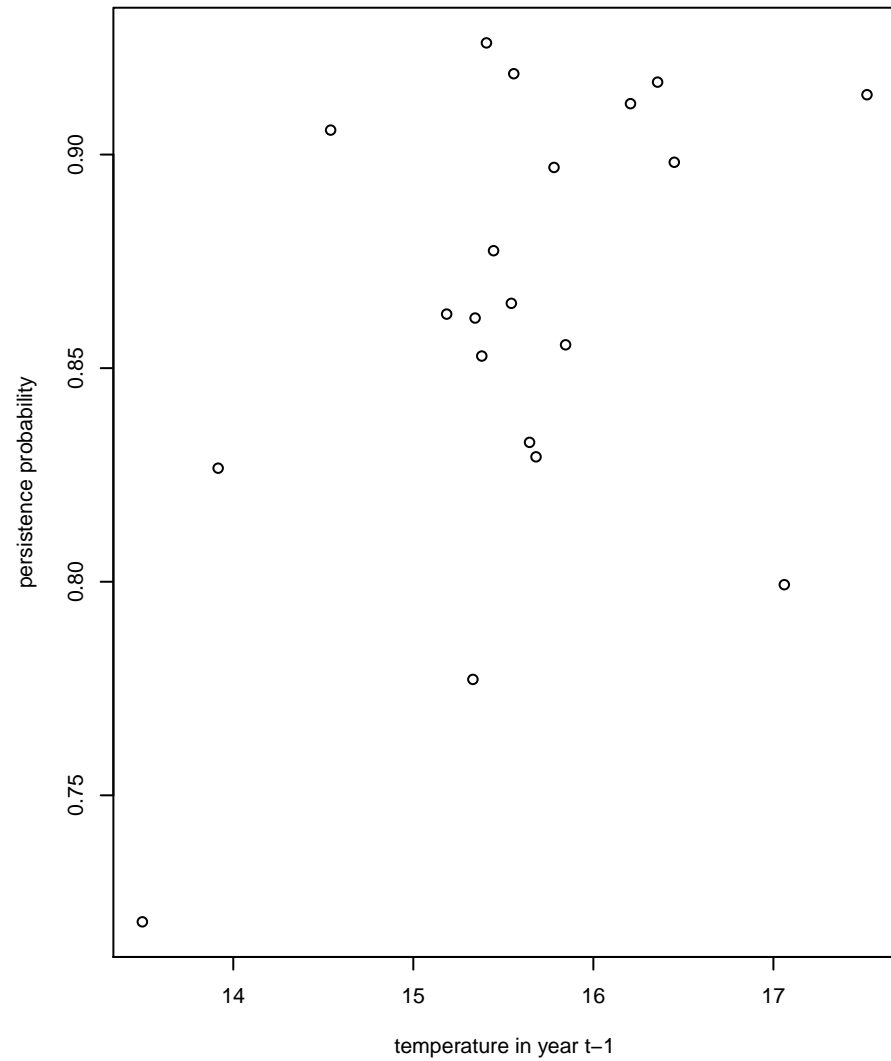

**Libellula depressa**

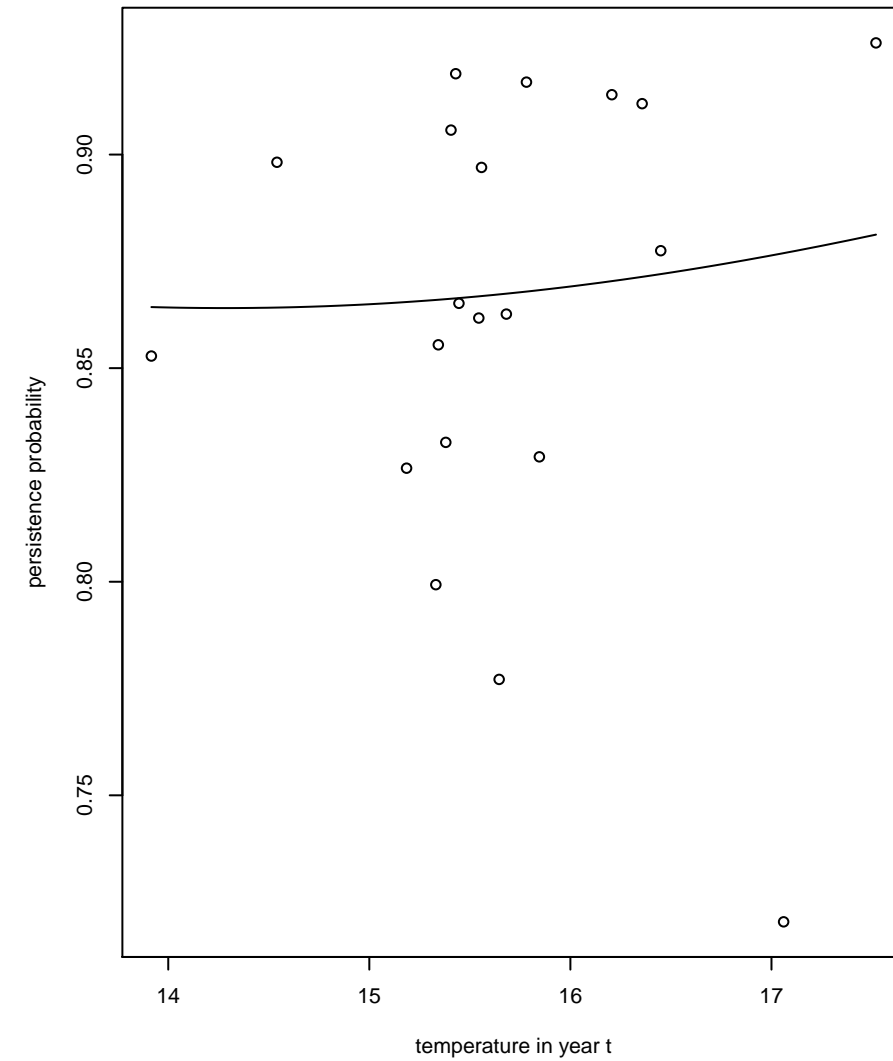

**Sympetrum striolatum**

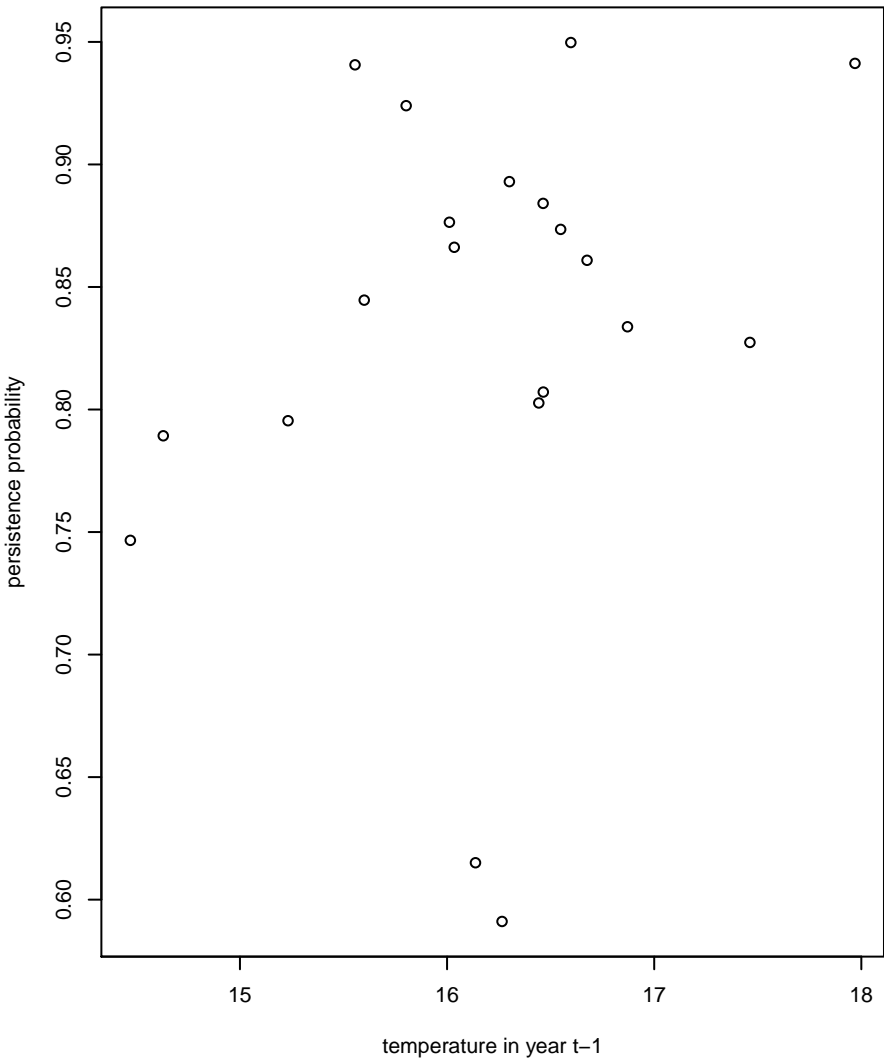

**Sympetrum striolatum**

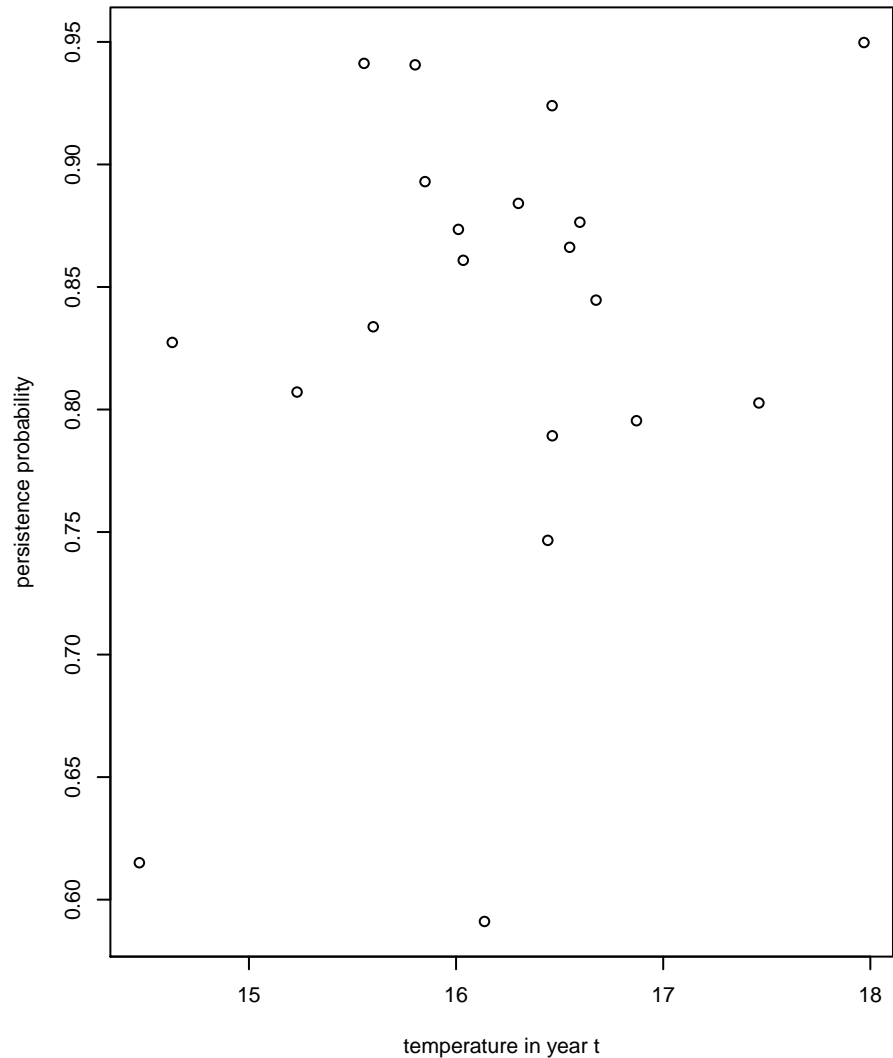

**Cordulia aenea**

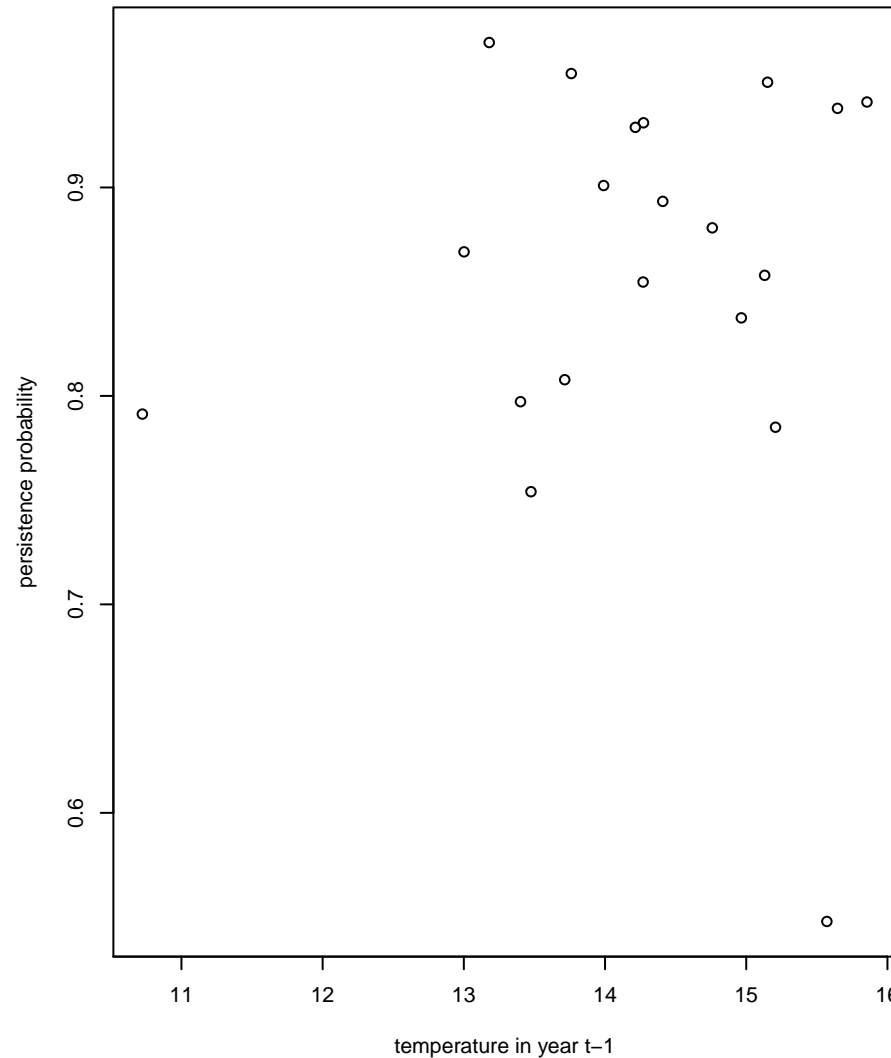

**Cordulia aenea**

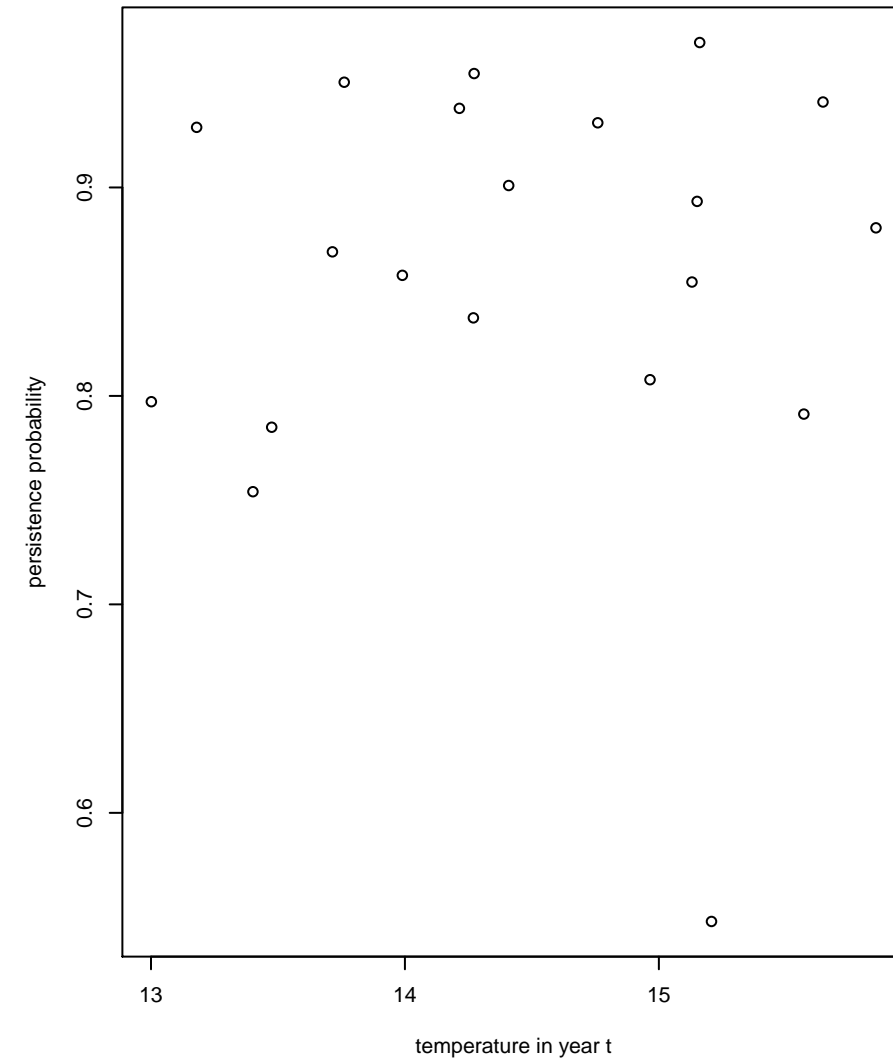

**Aeshna viridis**

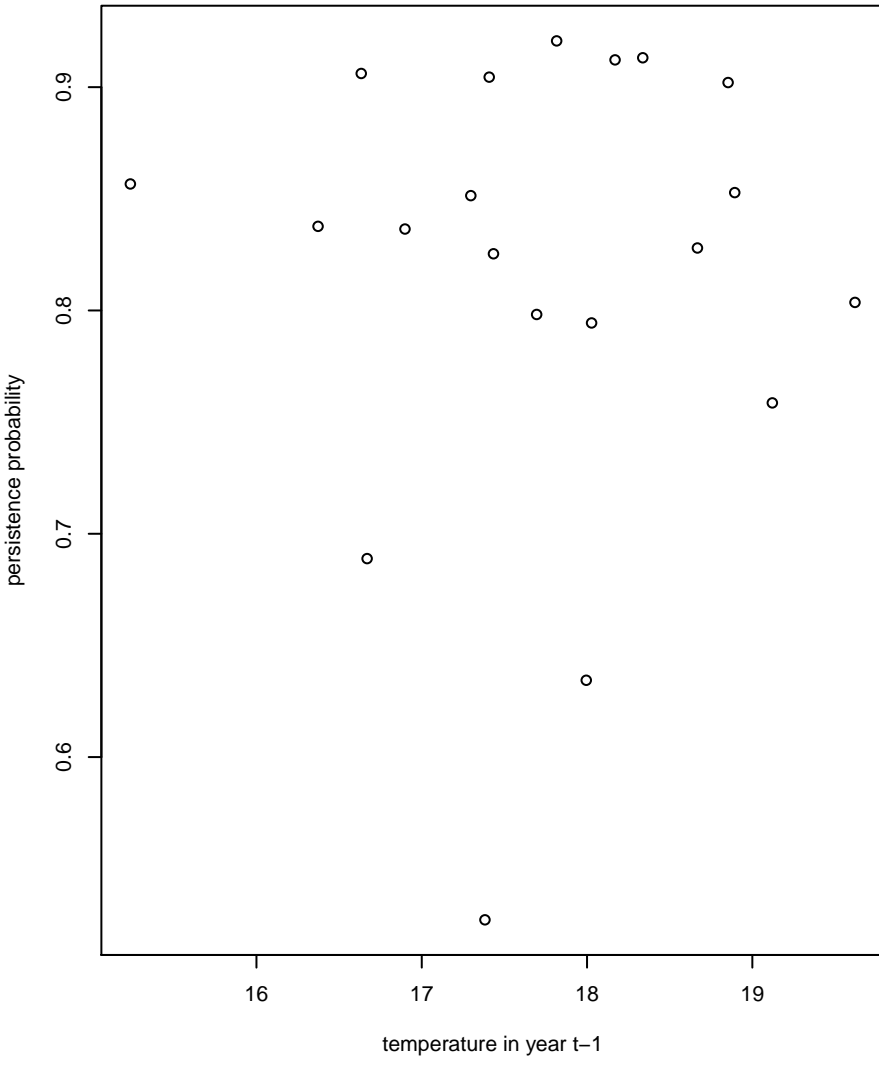

**Aeshna viridis**

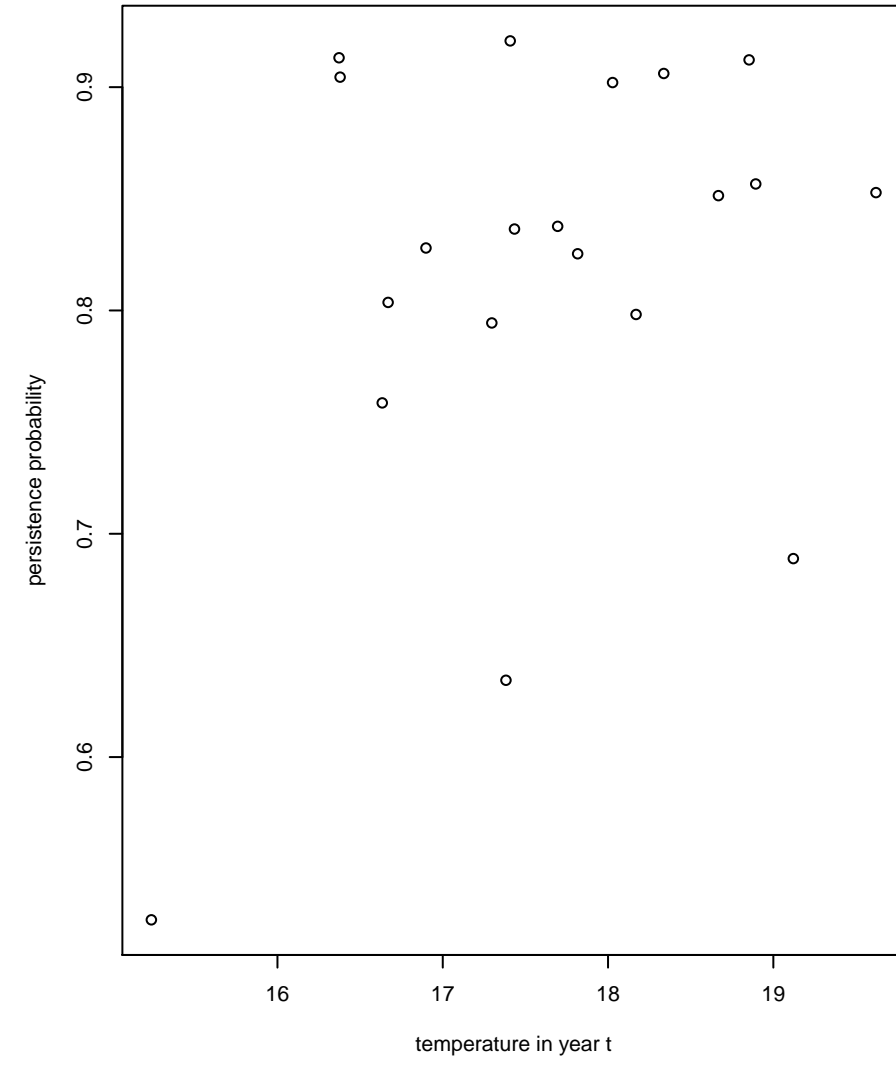

**Sympetrum flaveolum**

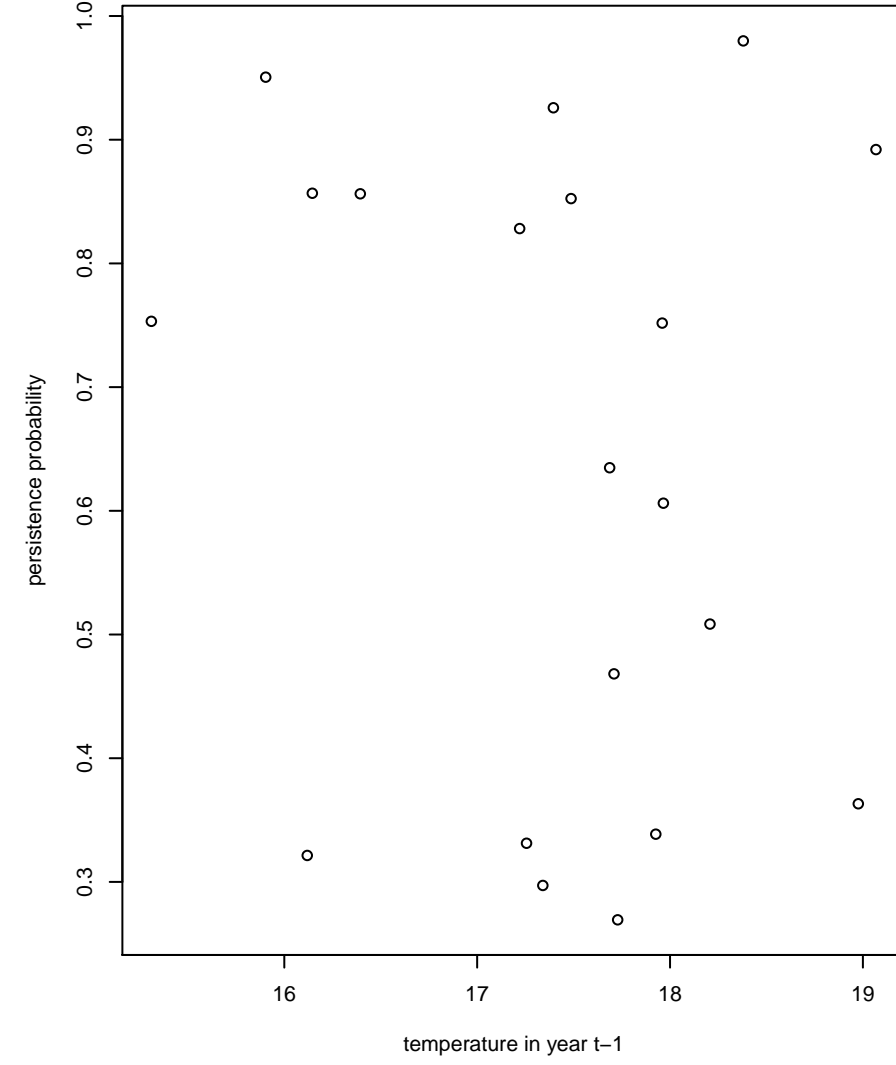

**Sympetrum flaveolum**

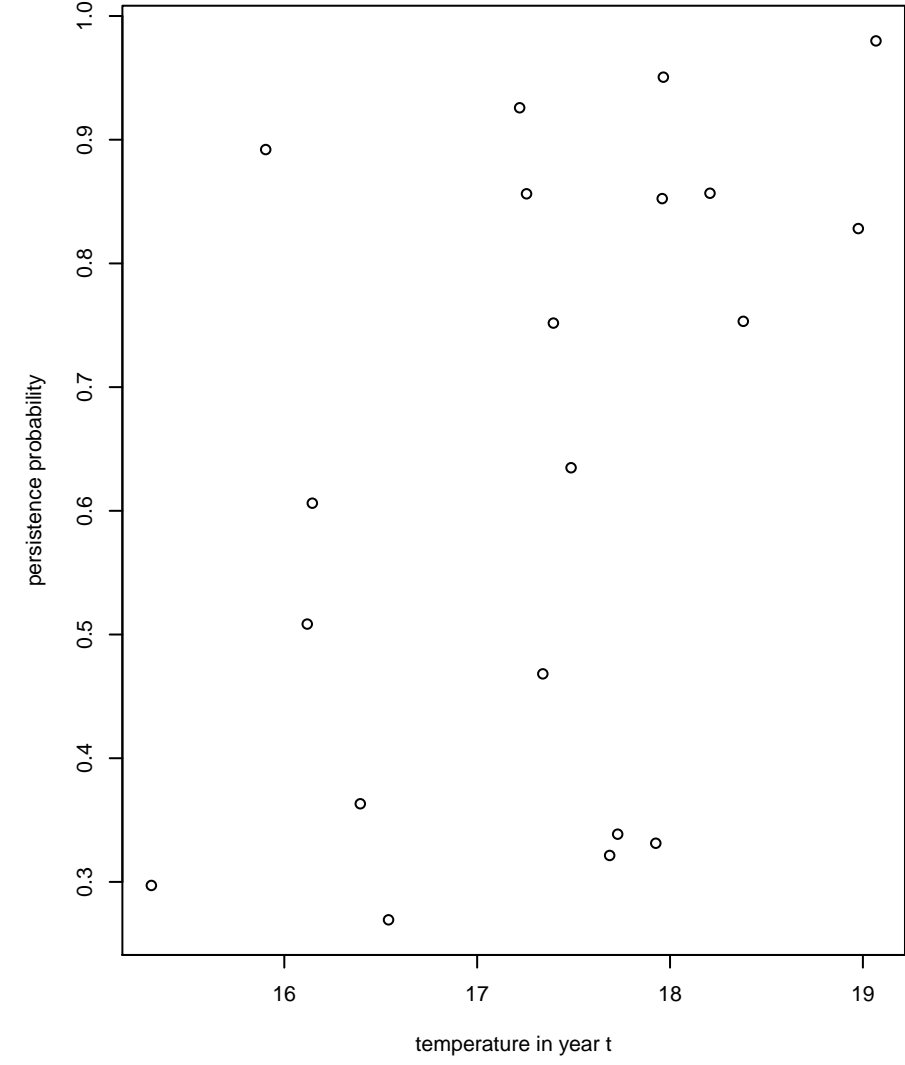

**Coenagrion lunulatum**

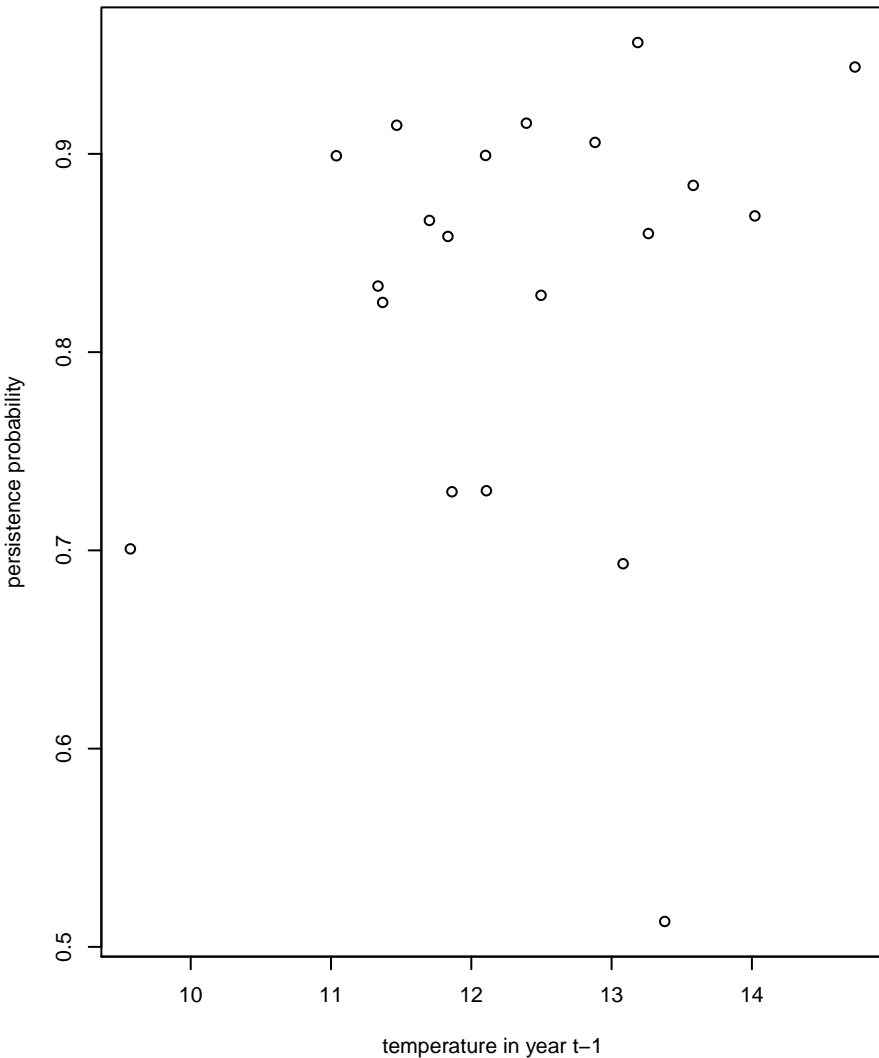

**Coenagrion lunulatum**

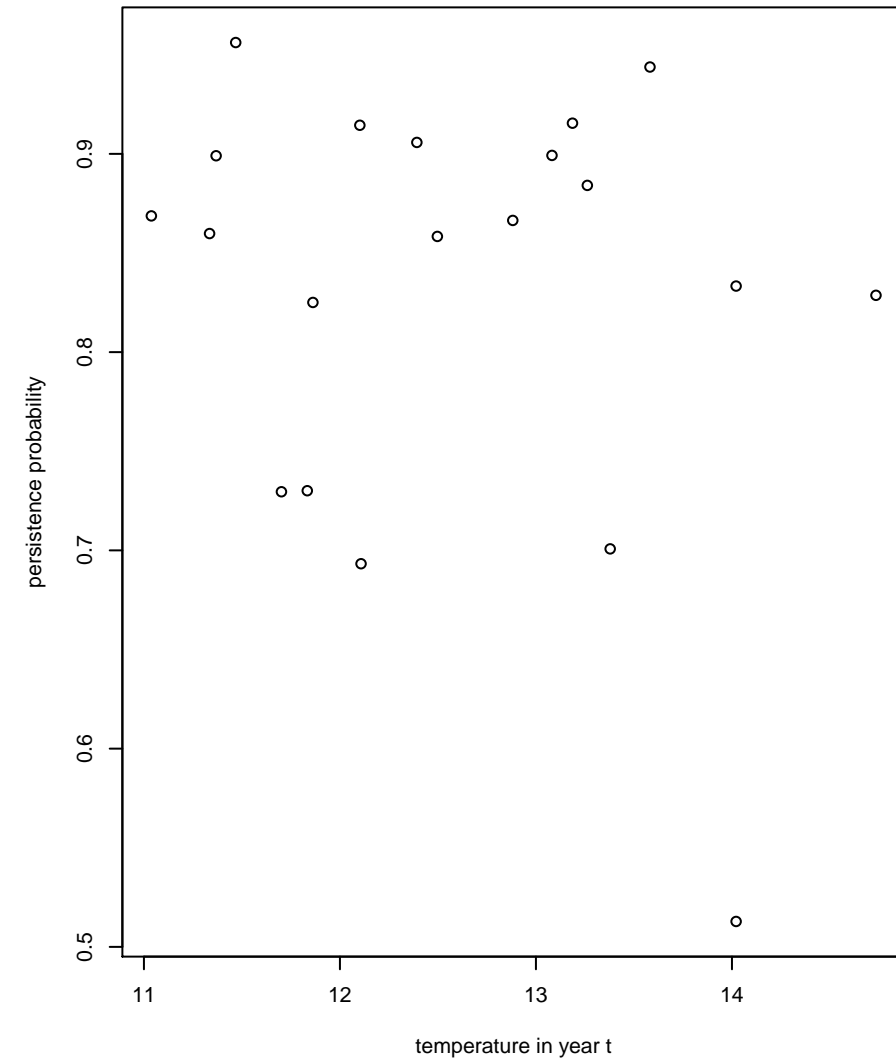

**Lestes dryas**

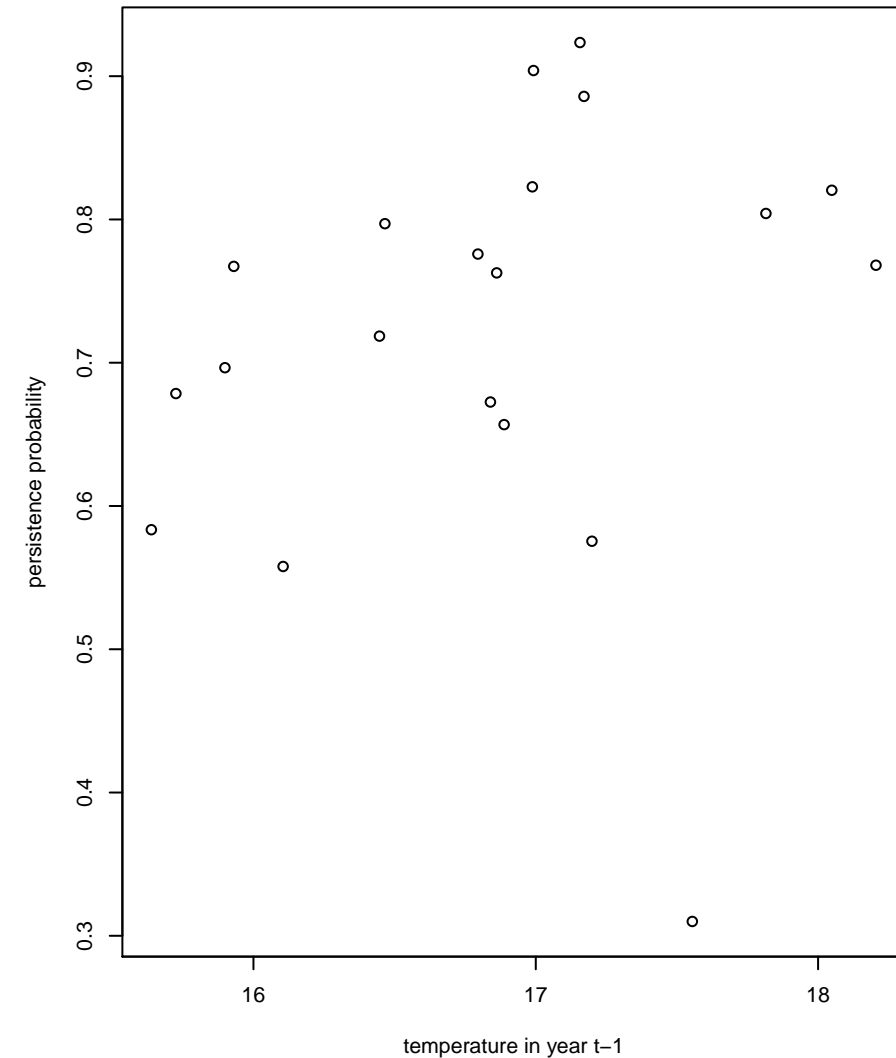

**Lestes dryas**

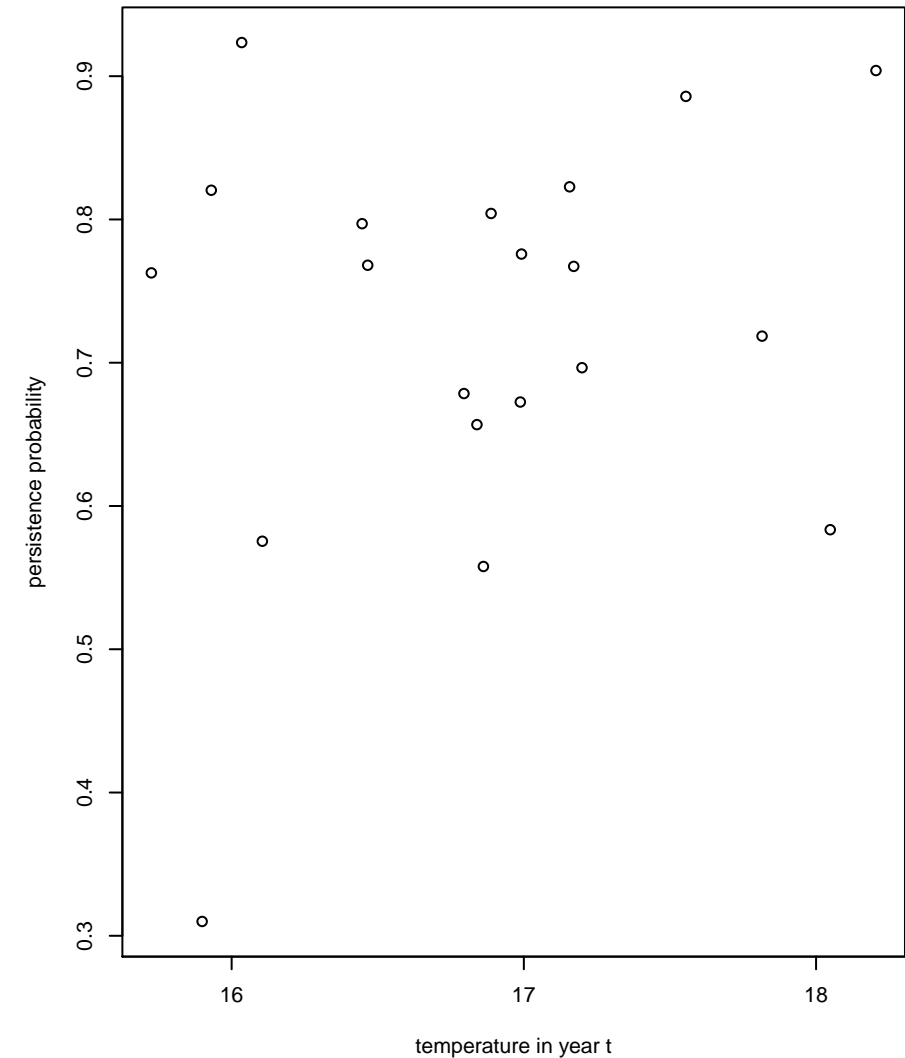

**Sympecma fusca**

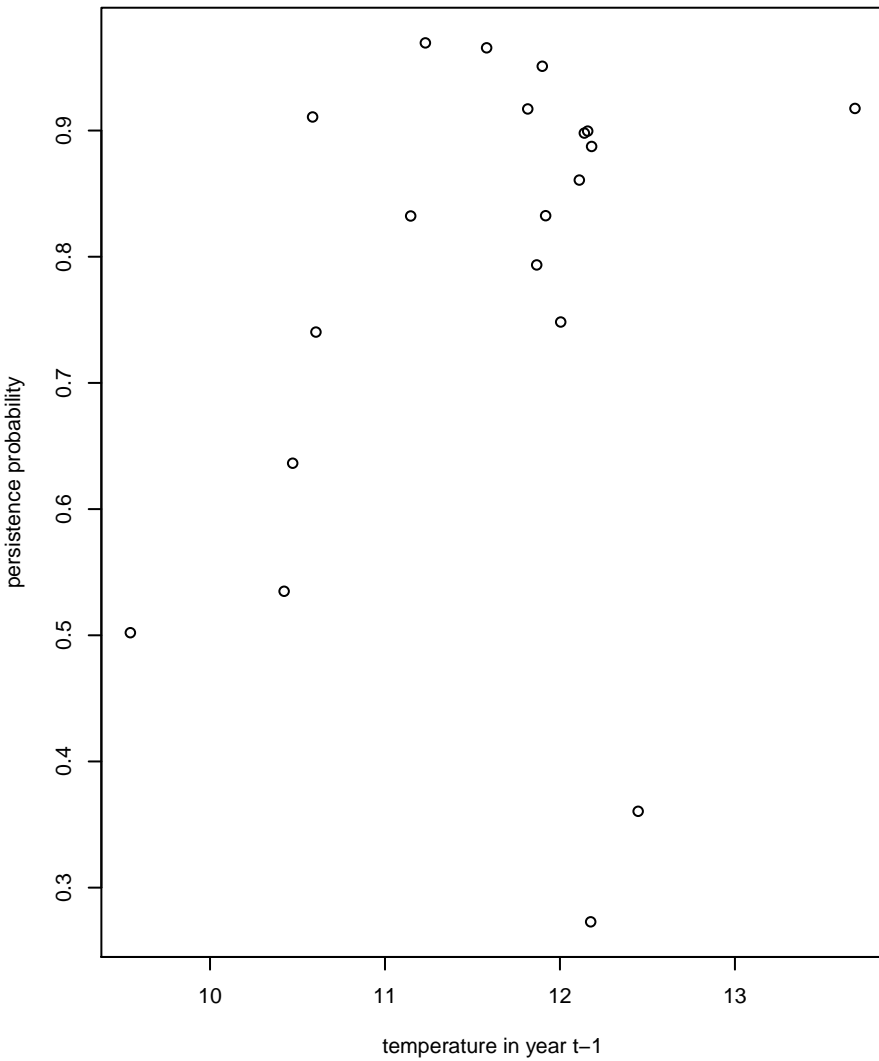

**Sympecma fusca**

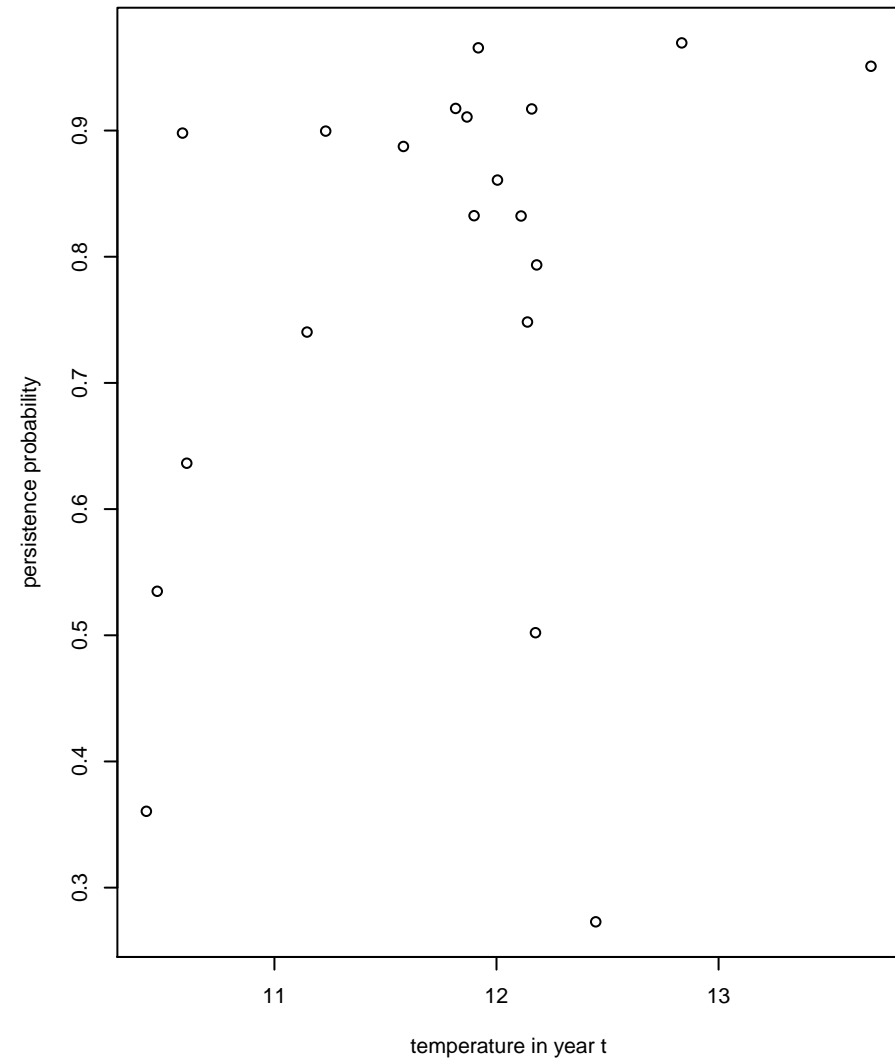

**Aeshna juncea**

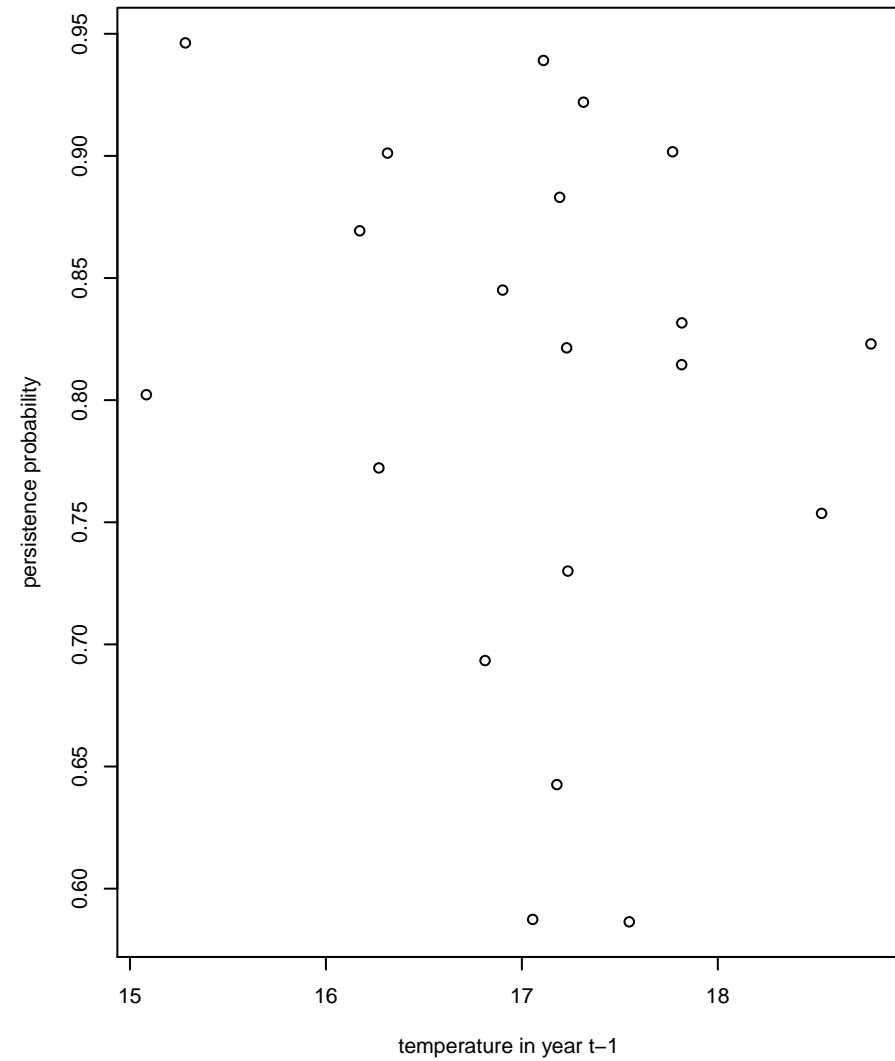

**Aeshna juncea**

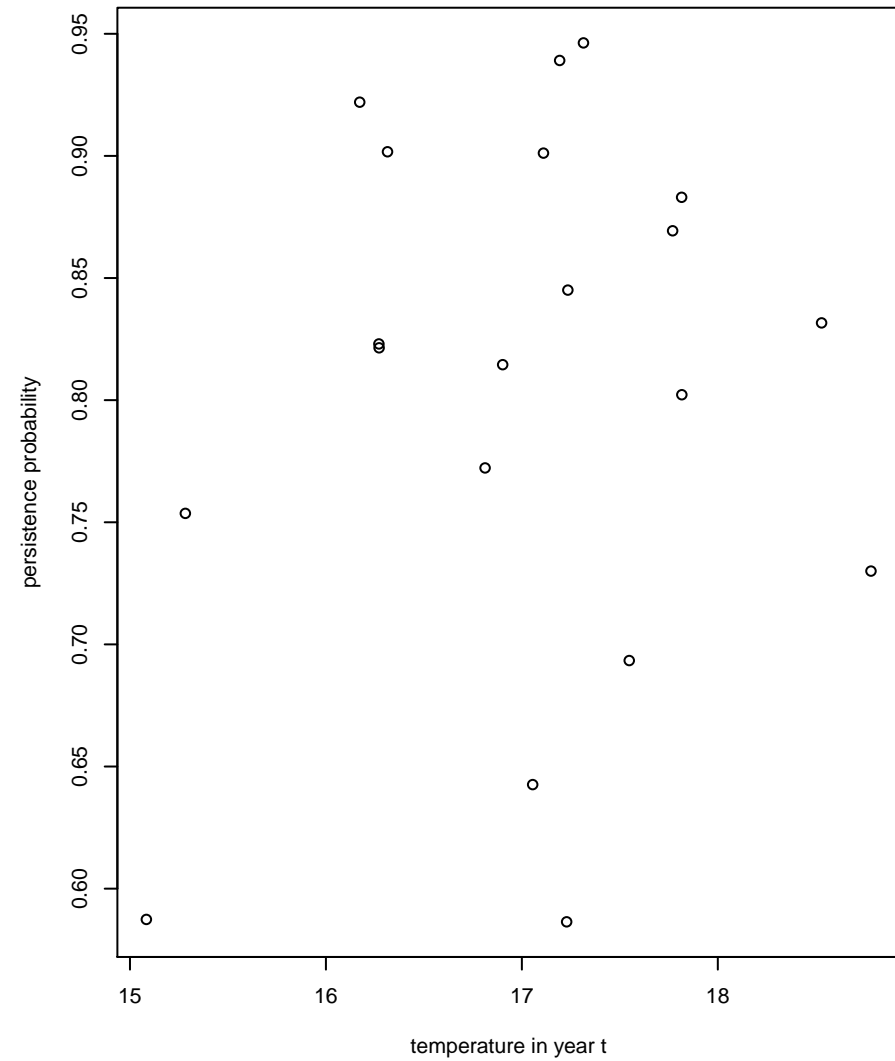

**Somatochlora metallica**

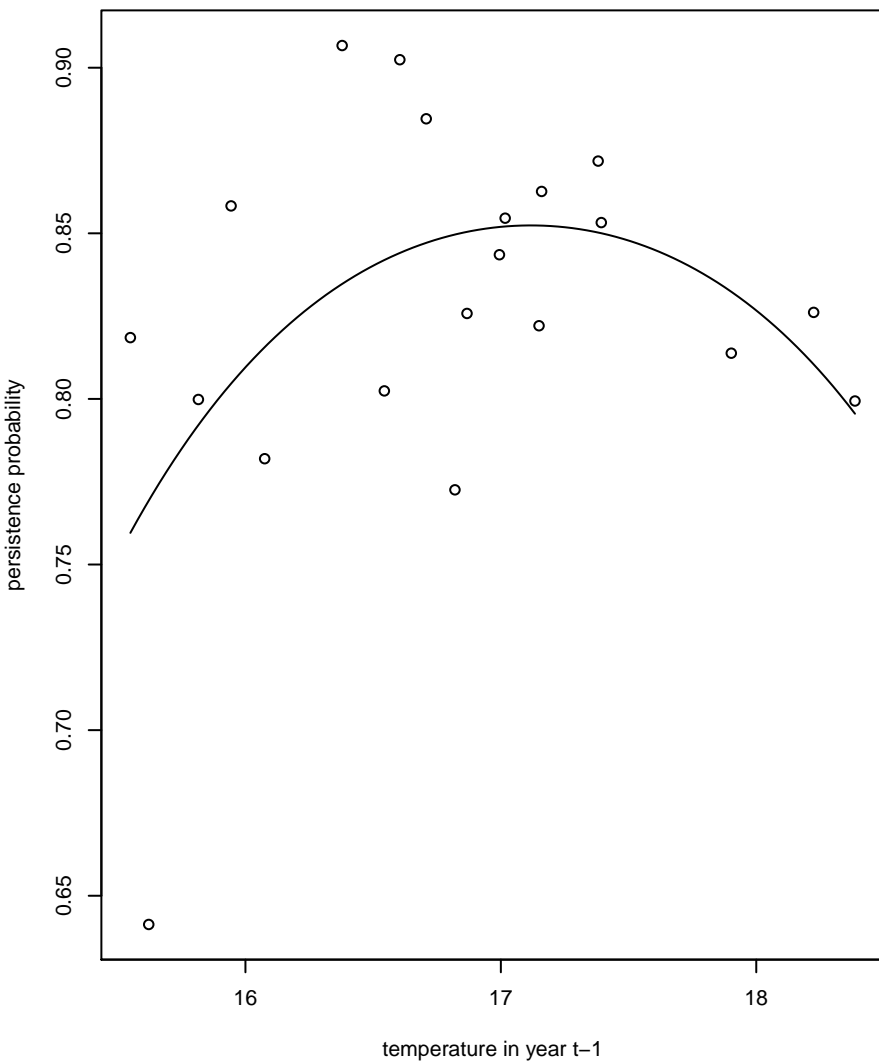

**Somatochlora metallica**

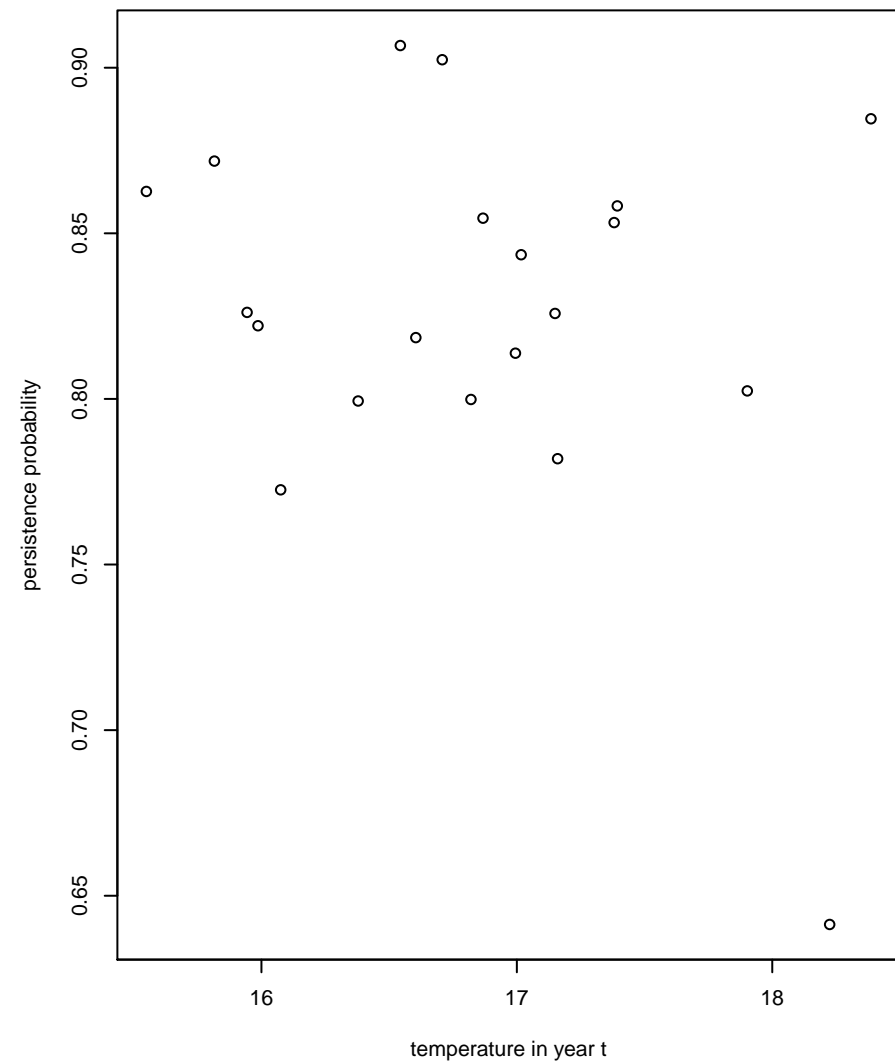

**Anax imperator**

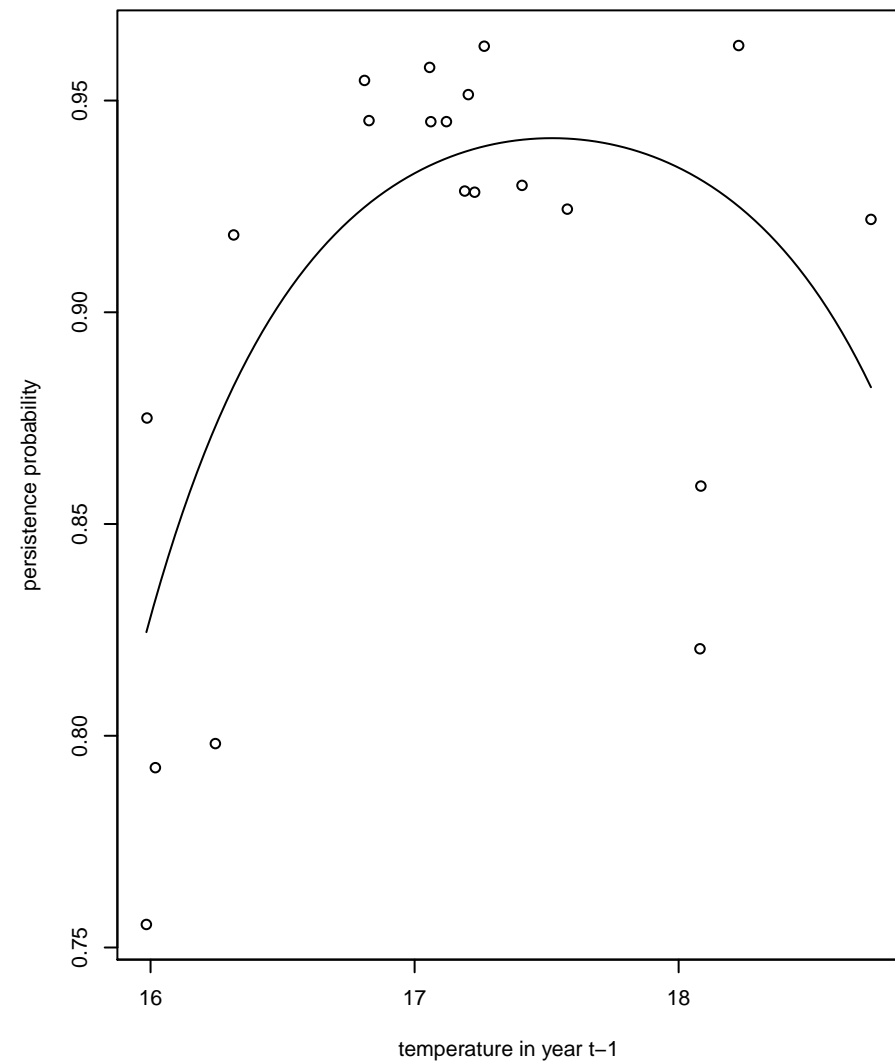

**Anax imperator**

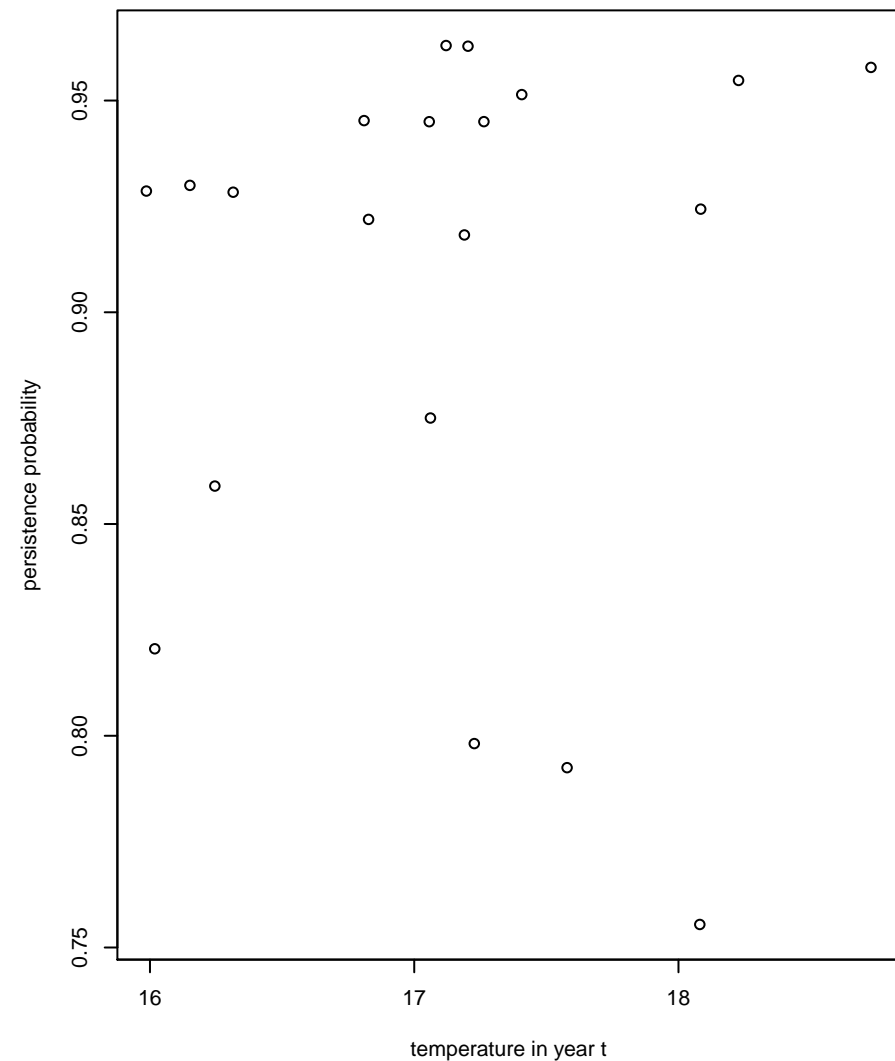

**Erythromma viridulum**

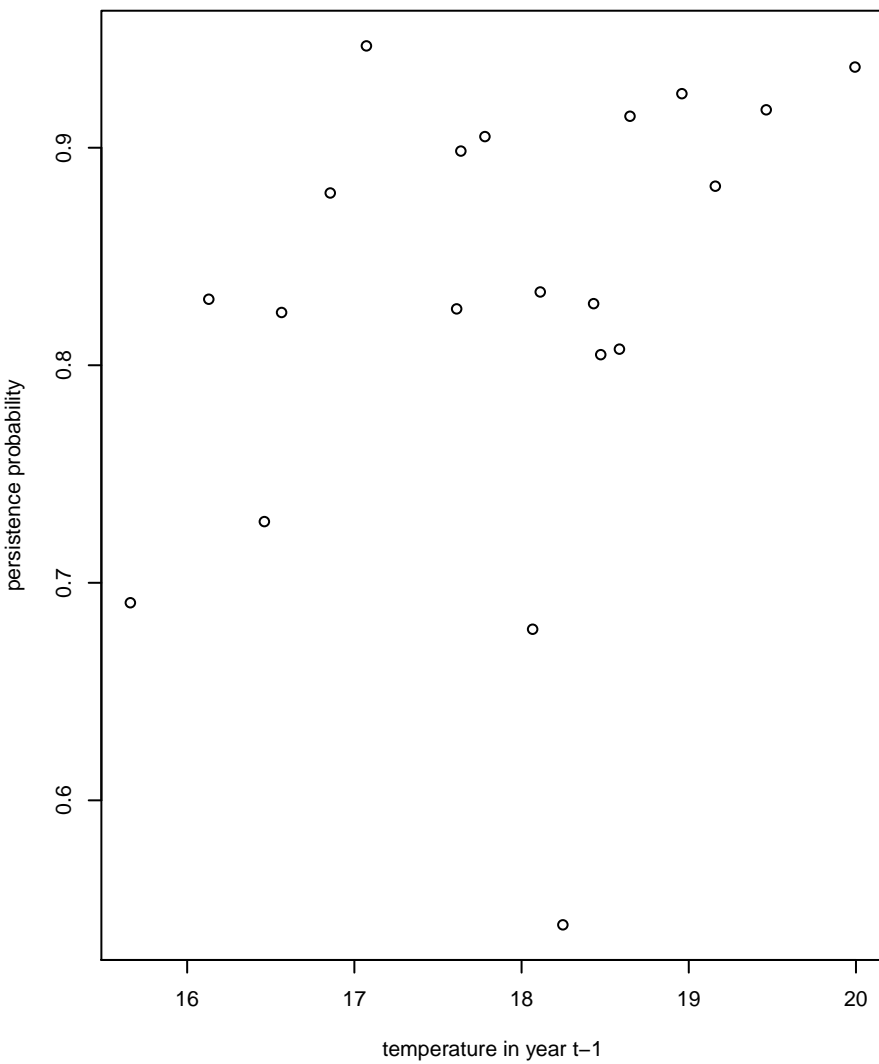

**Erythromma viridulum**

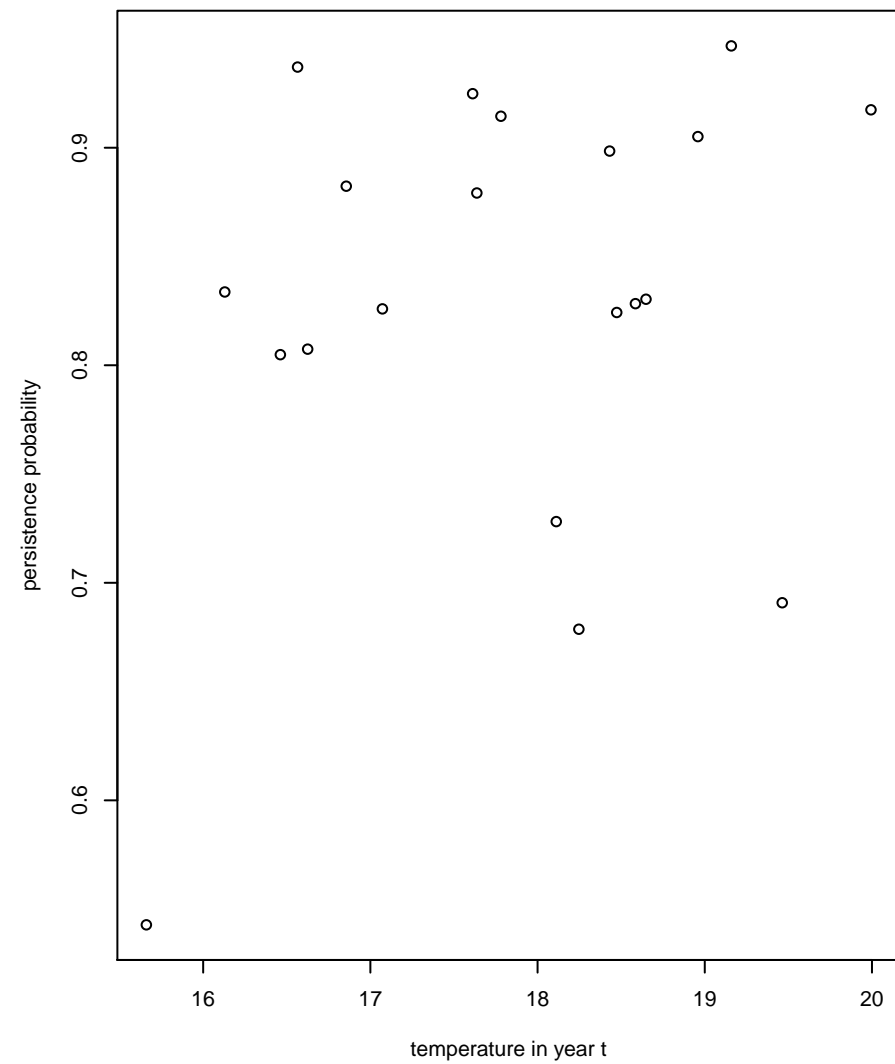

**Platycnemis pennipes**

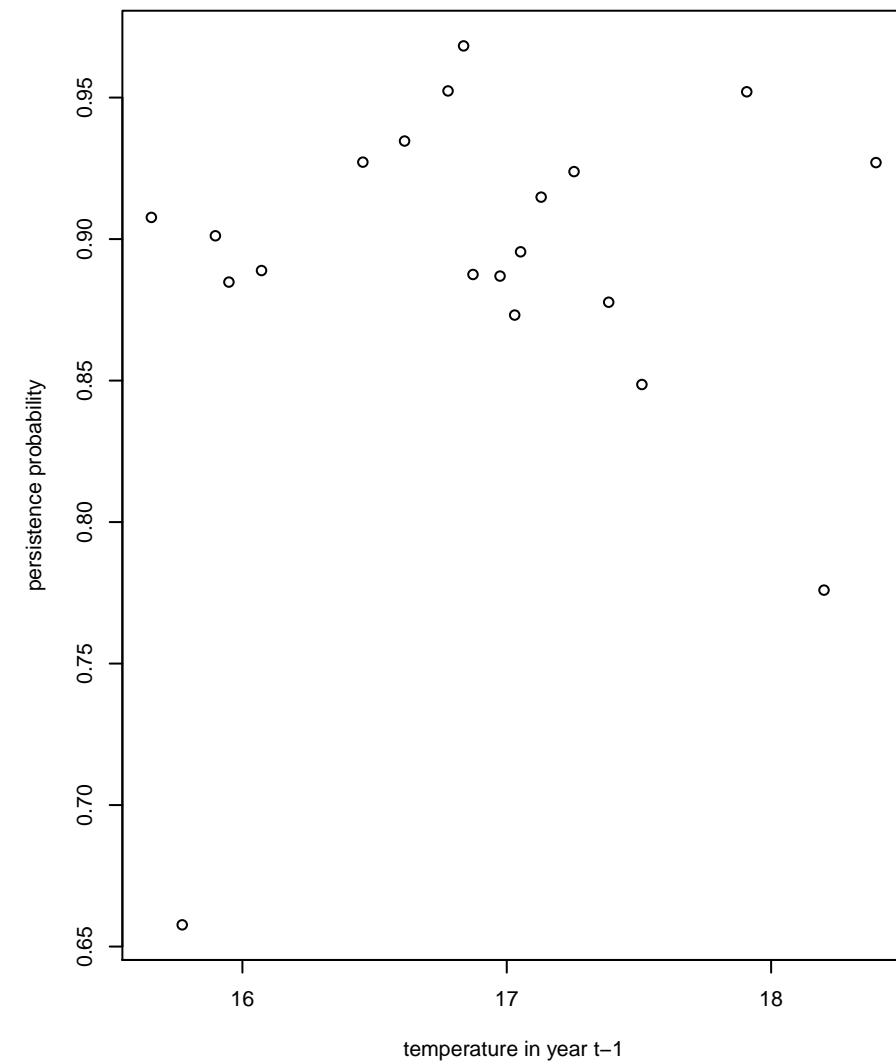

**Platycnemis pennipes**

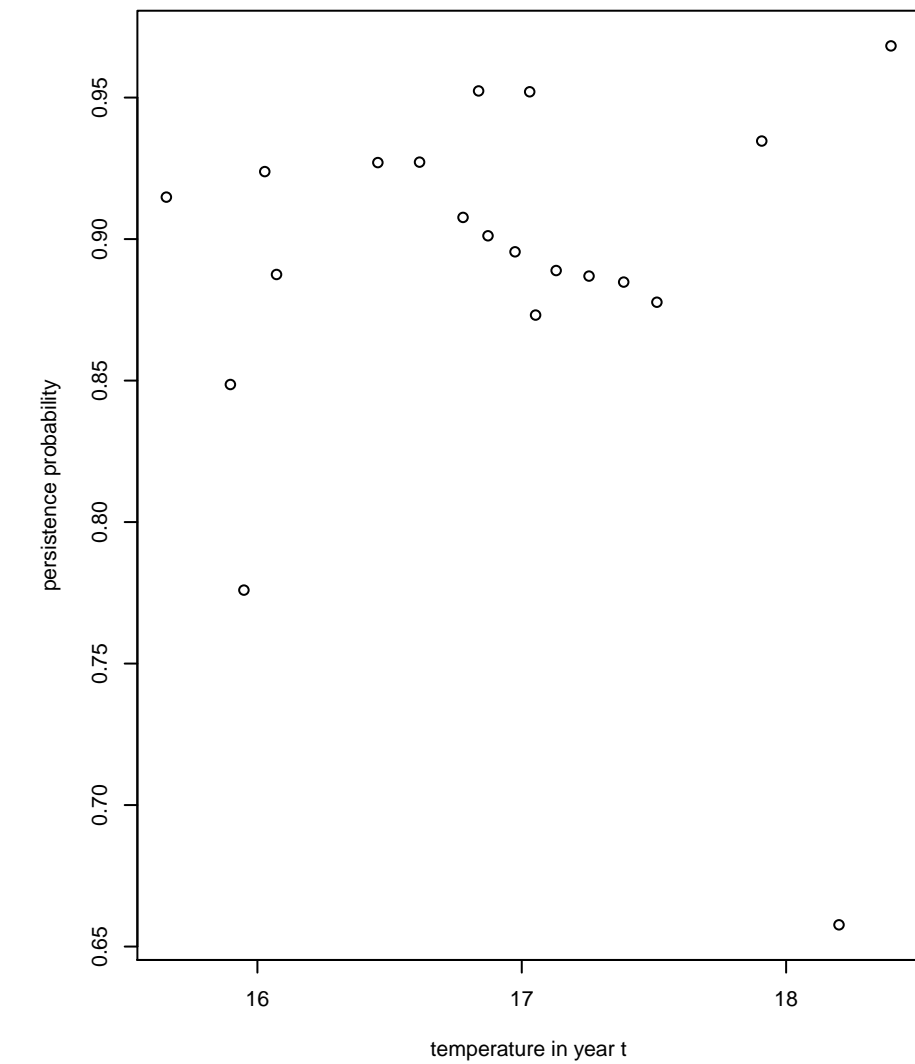

**Libellula fulva**

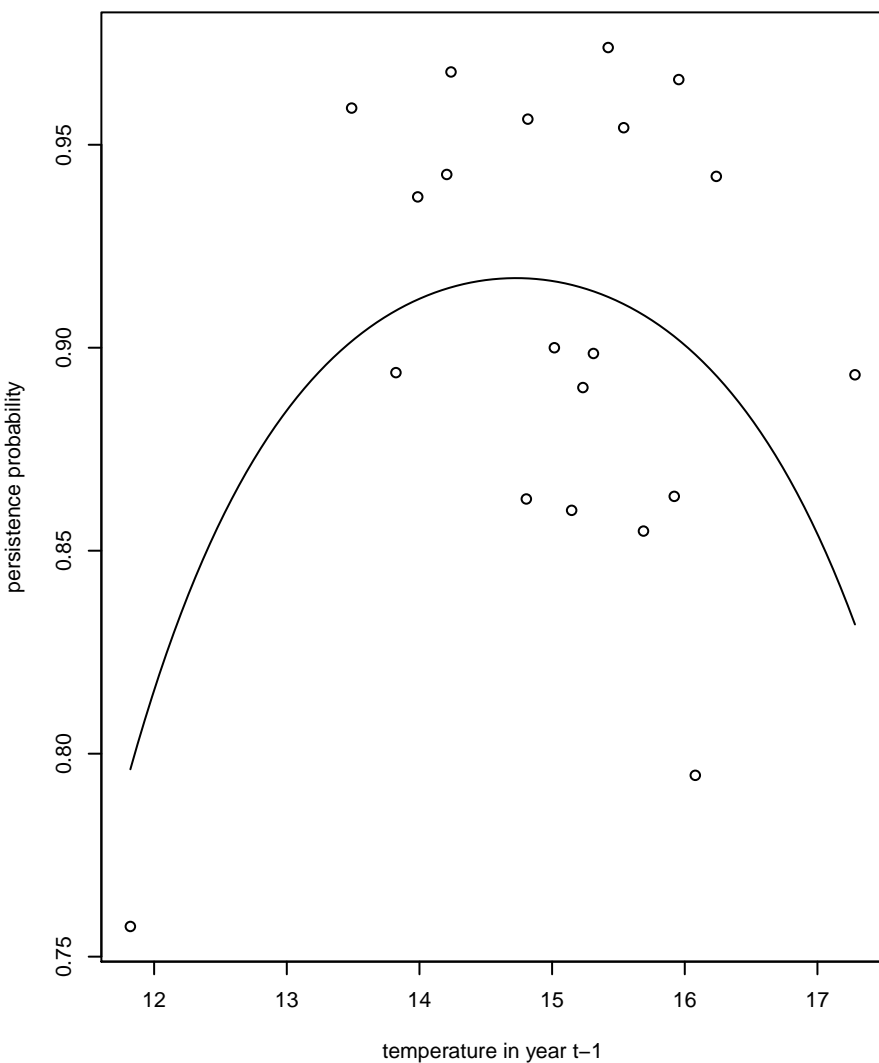

**Libellula fulva**

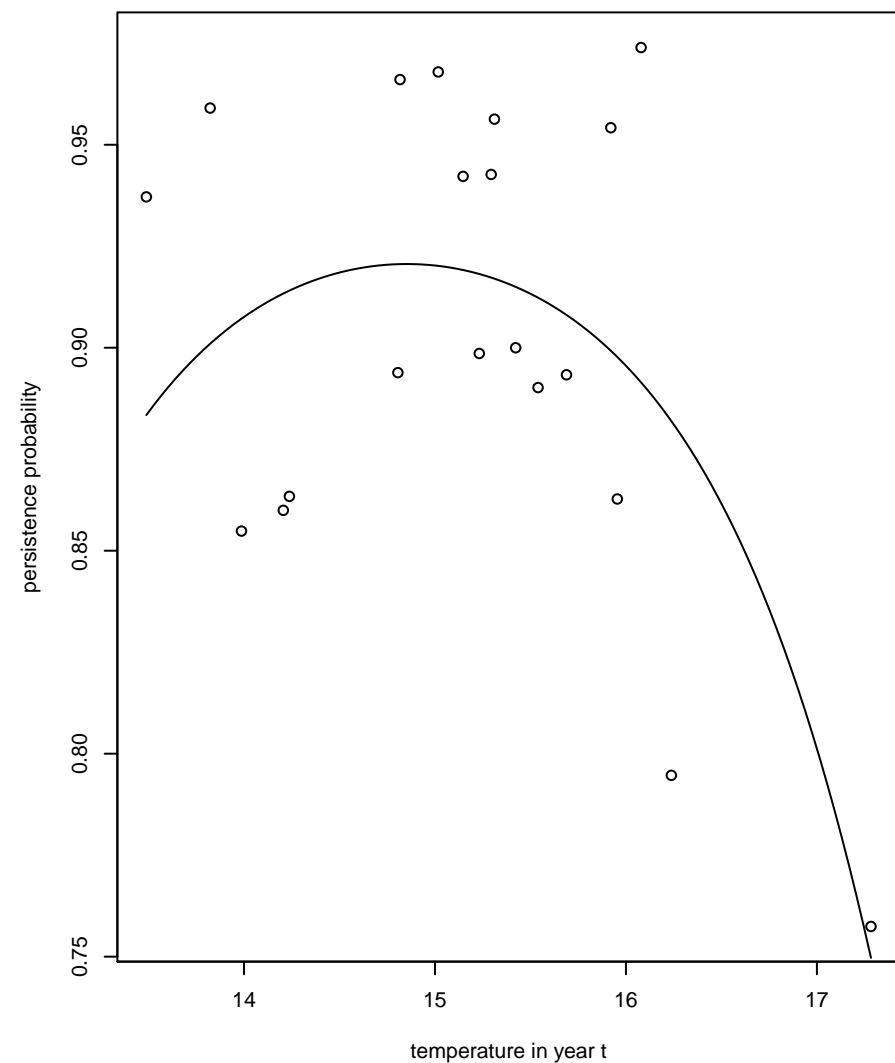

**Gomphus pulchellus**

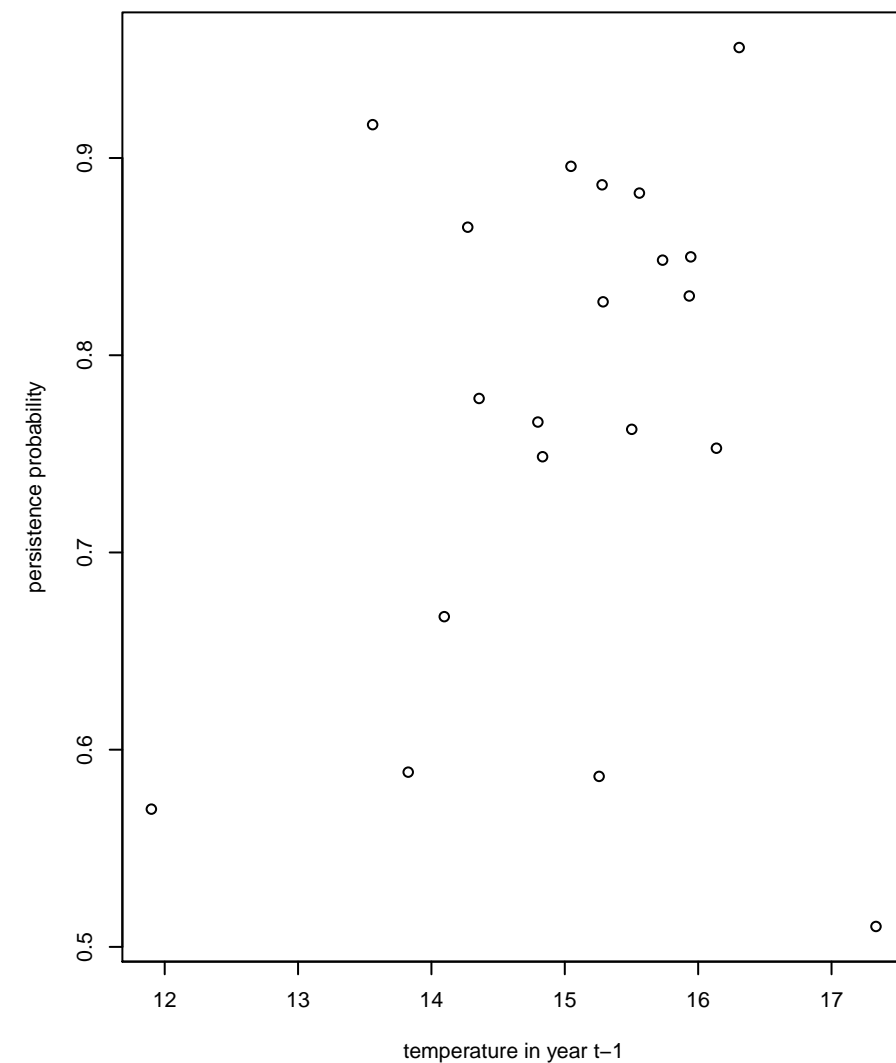

**Gomphus pulchellus**

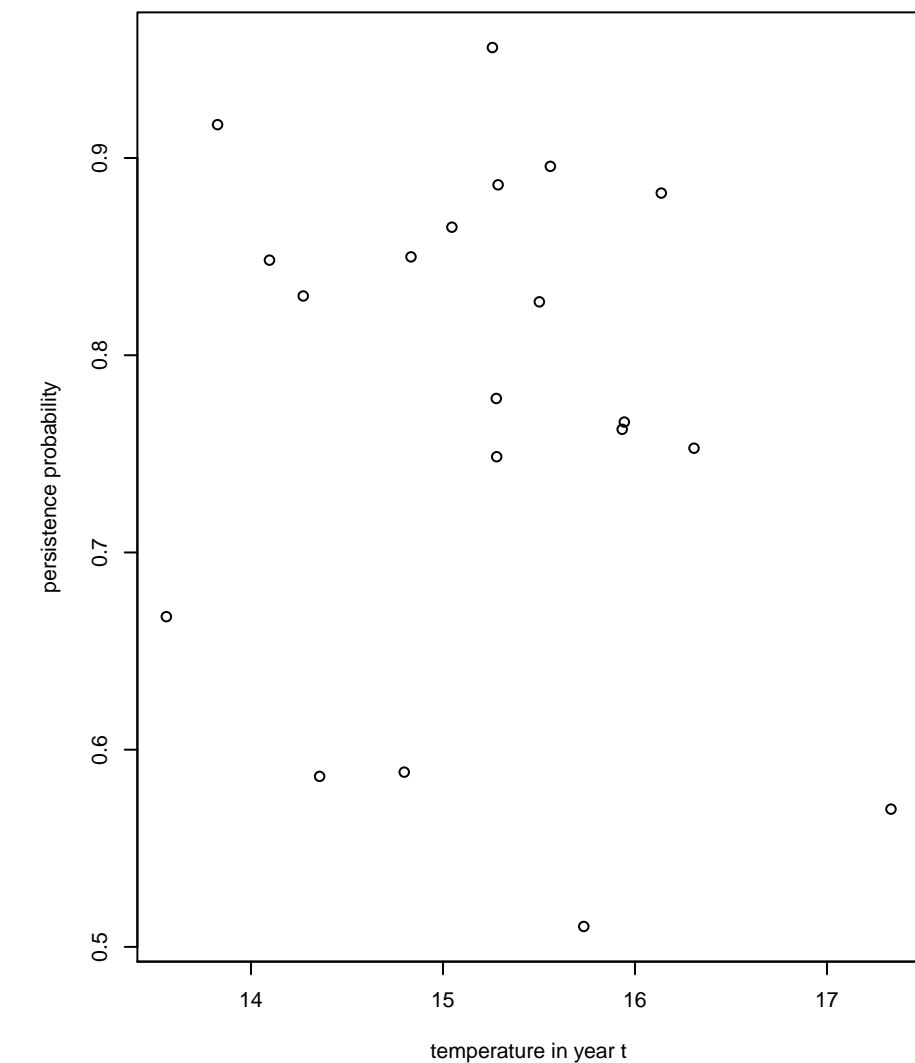

Supplement: pone.0110219.s003.pdf [file pone.0110219.s003.pdf]
