# Supplementary material for: No Evidence of the Effect of Extreme Weather Events on Annual Occurrence of Four Groups of Ectothermic Species
Source: PubMed Central journal article supplement (PMC4201516; doi:10.1371/journal.pone.0110219), 2014-10-17

**Pyronia tithonus**

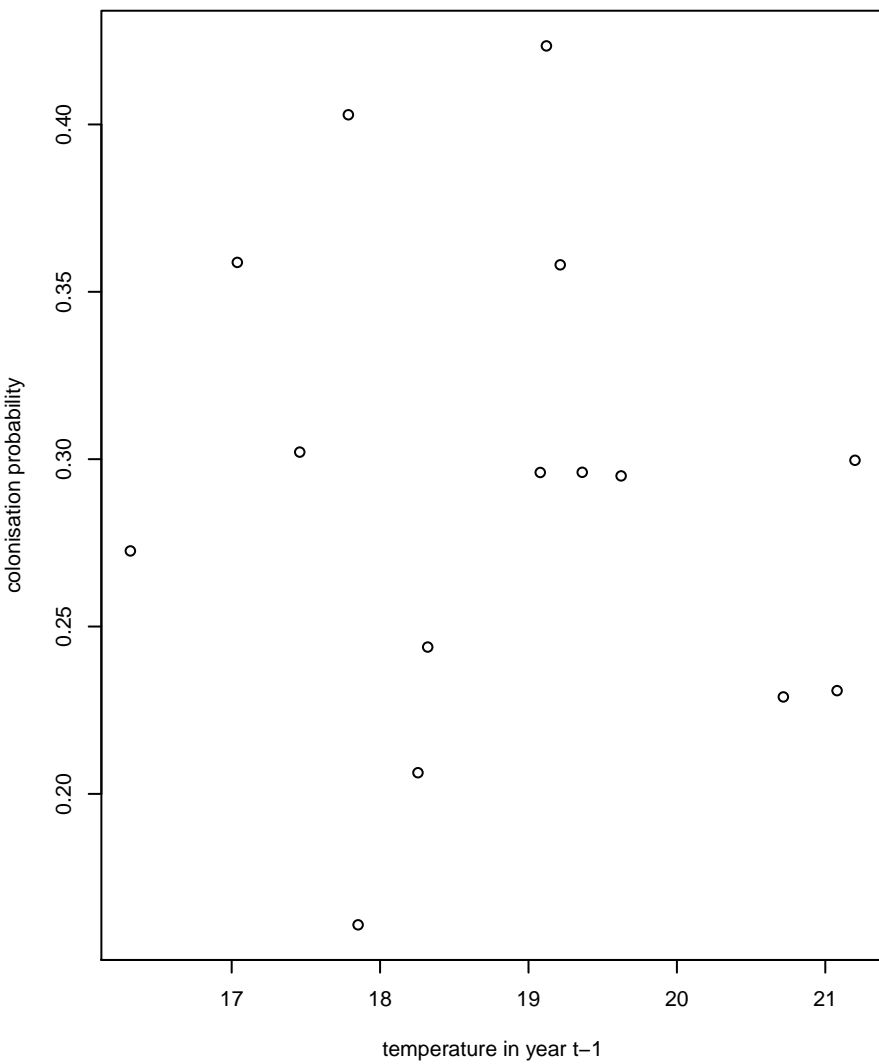

**Pyronia tithonus**

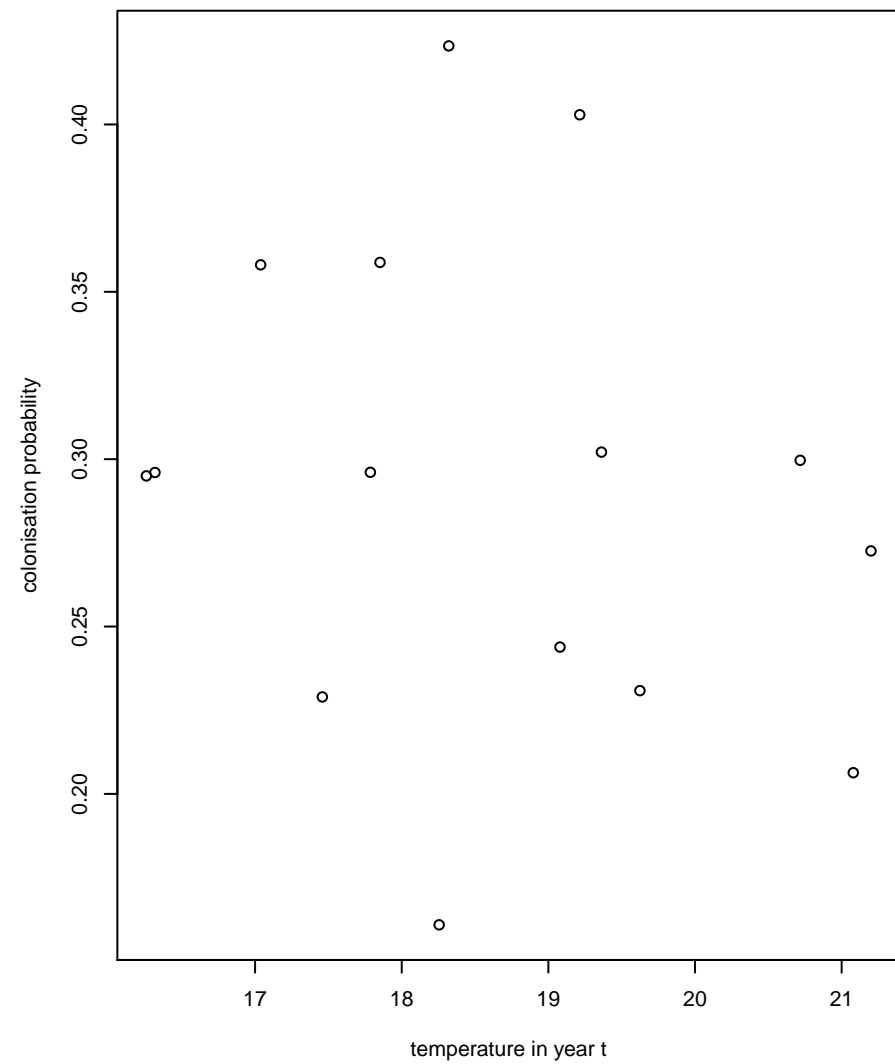

**Maniola jurtina**

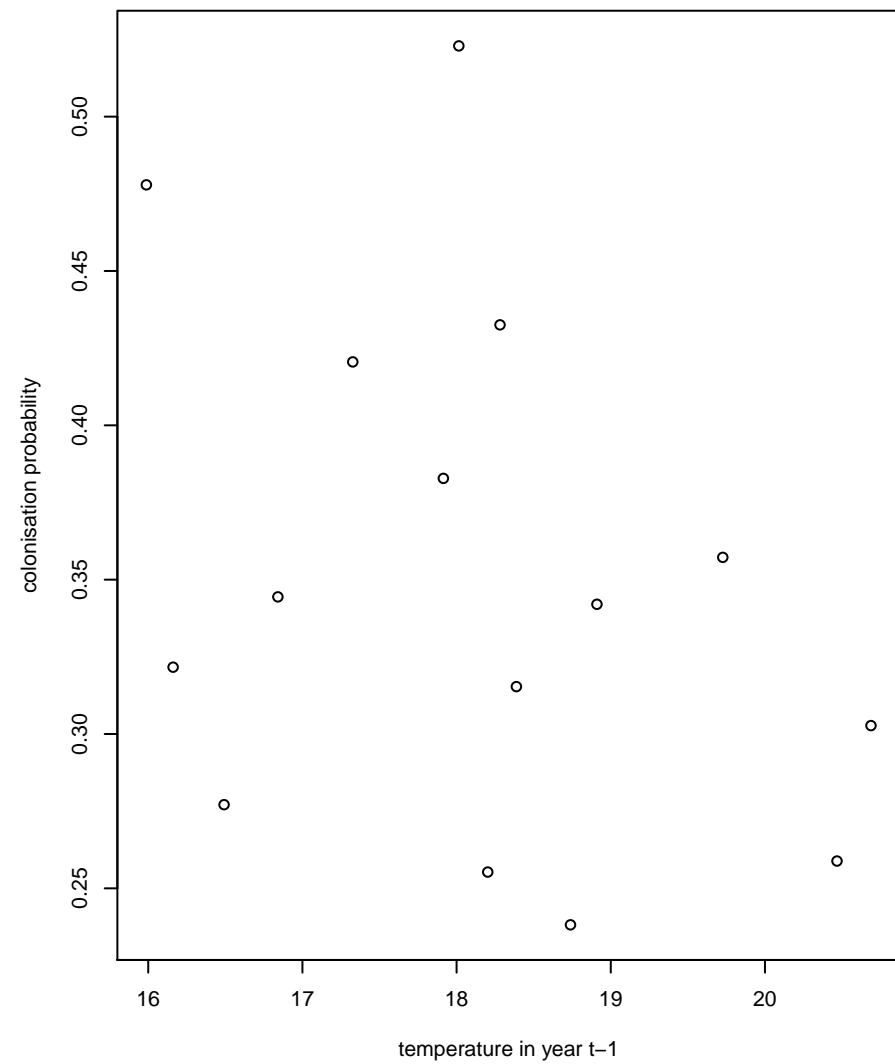

**Maniola jurtina**

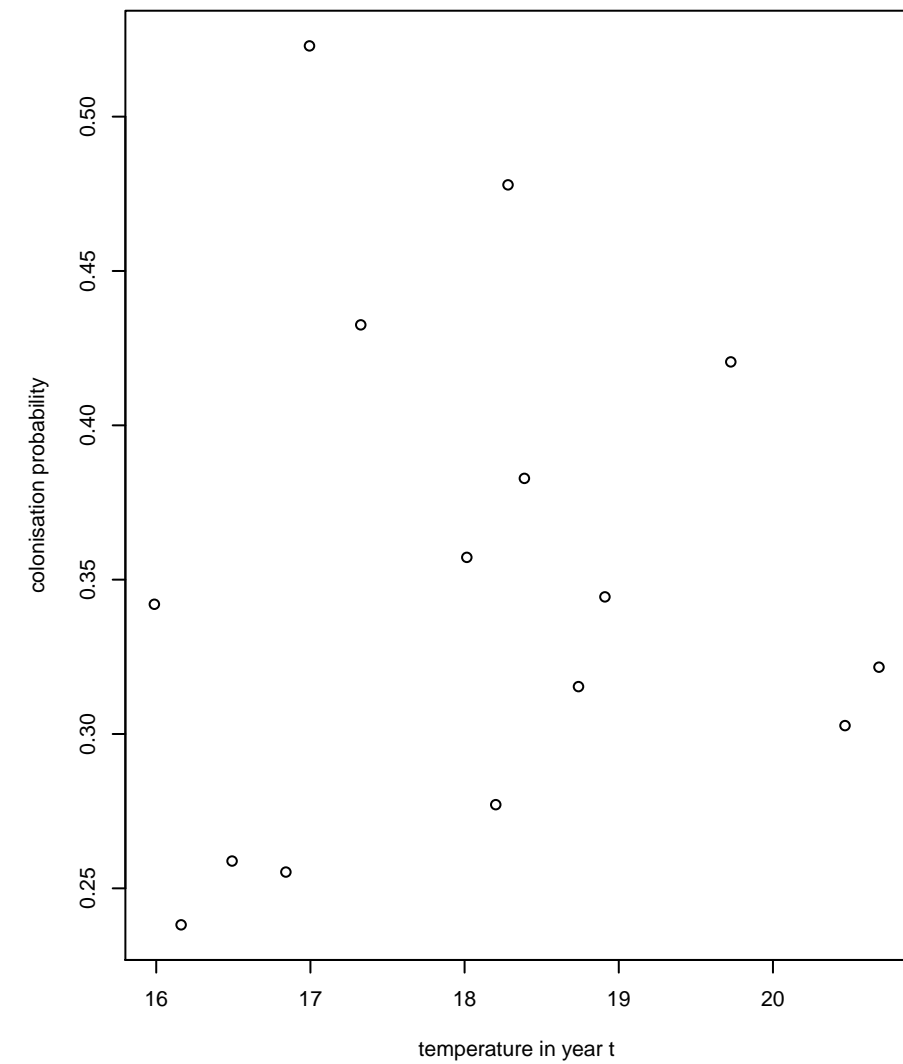

**Hipparchia semele**

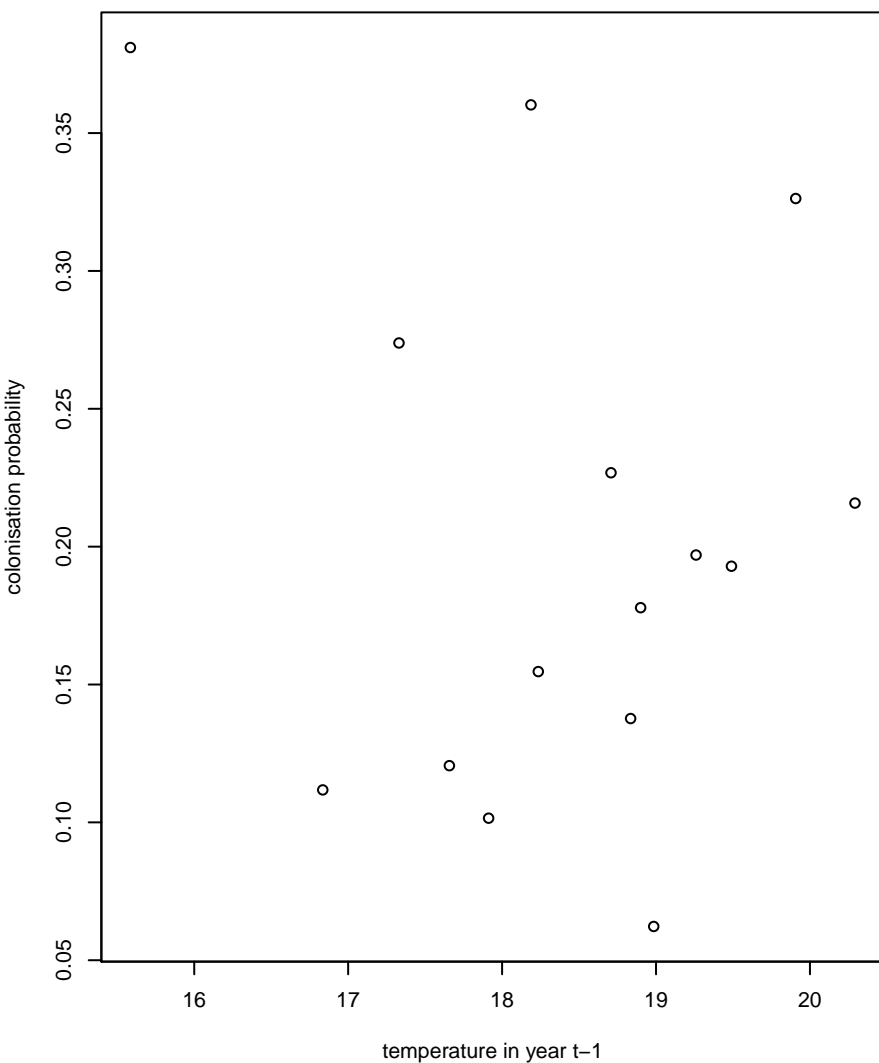

**Hipparchia semele**

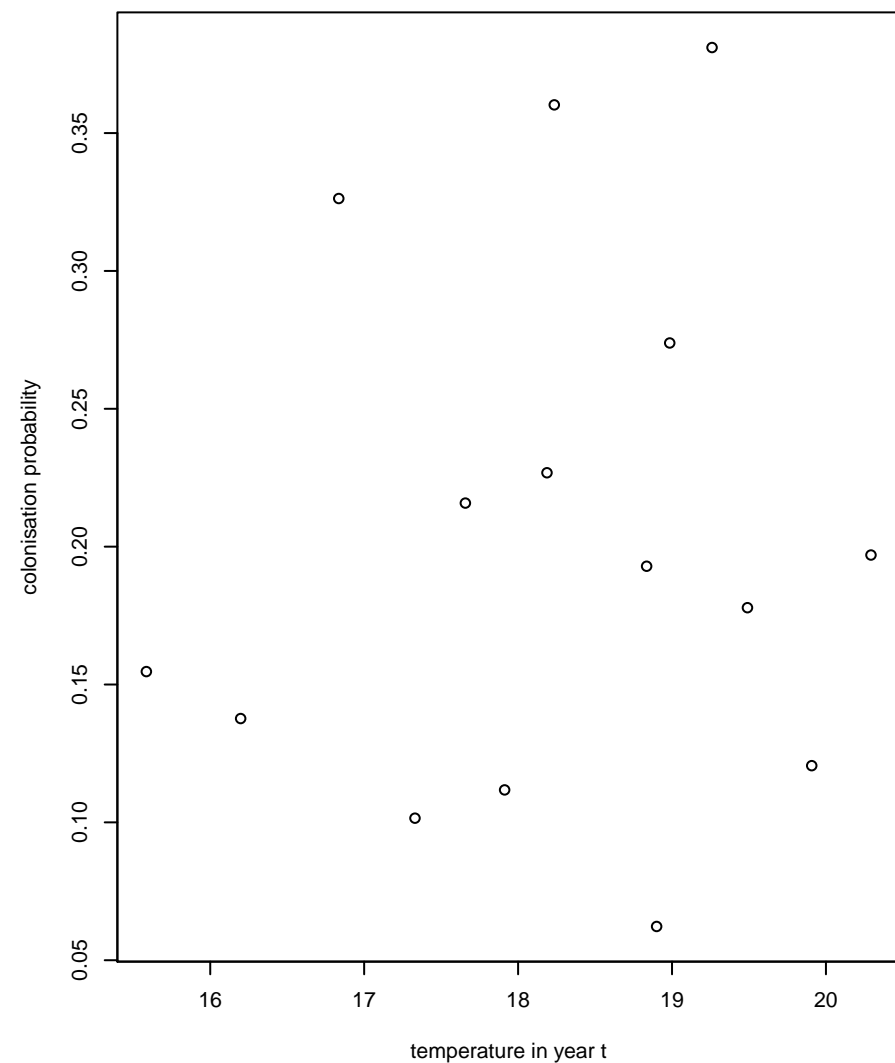

**Pyrgus malvae**

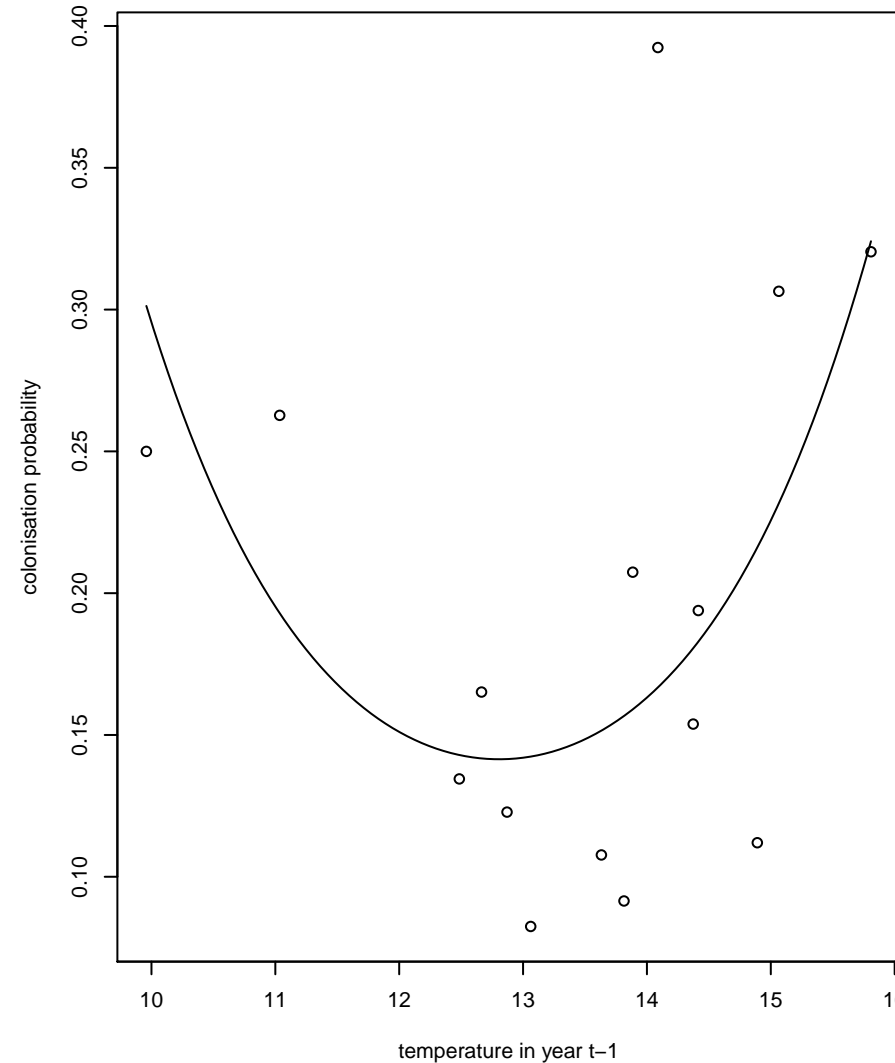

**Pyrgus malvae**

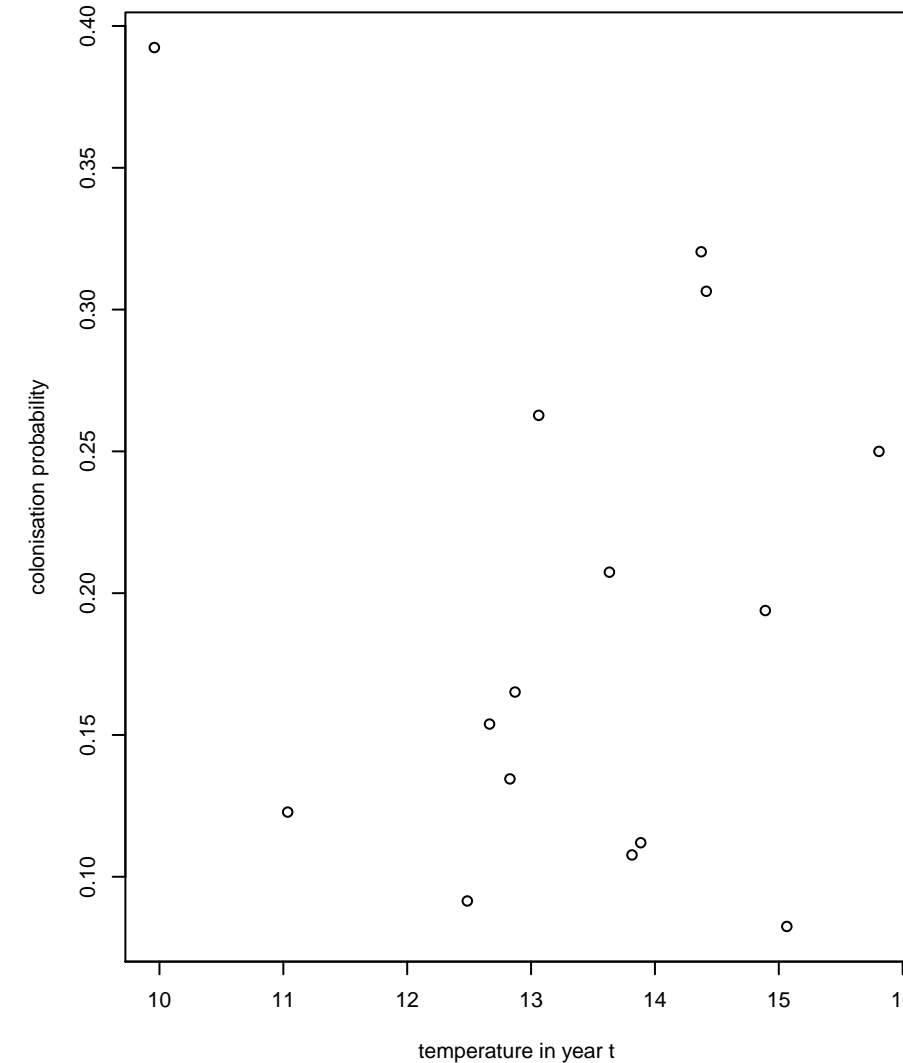

**Papilio machaon**

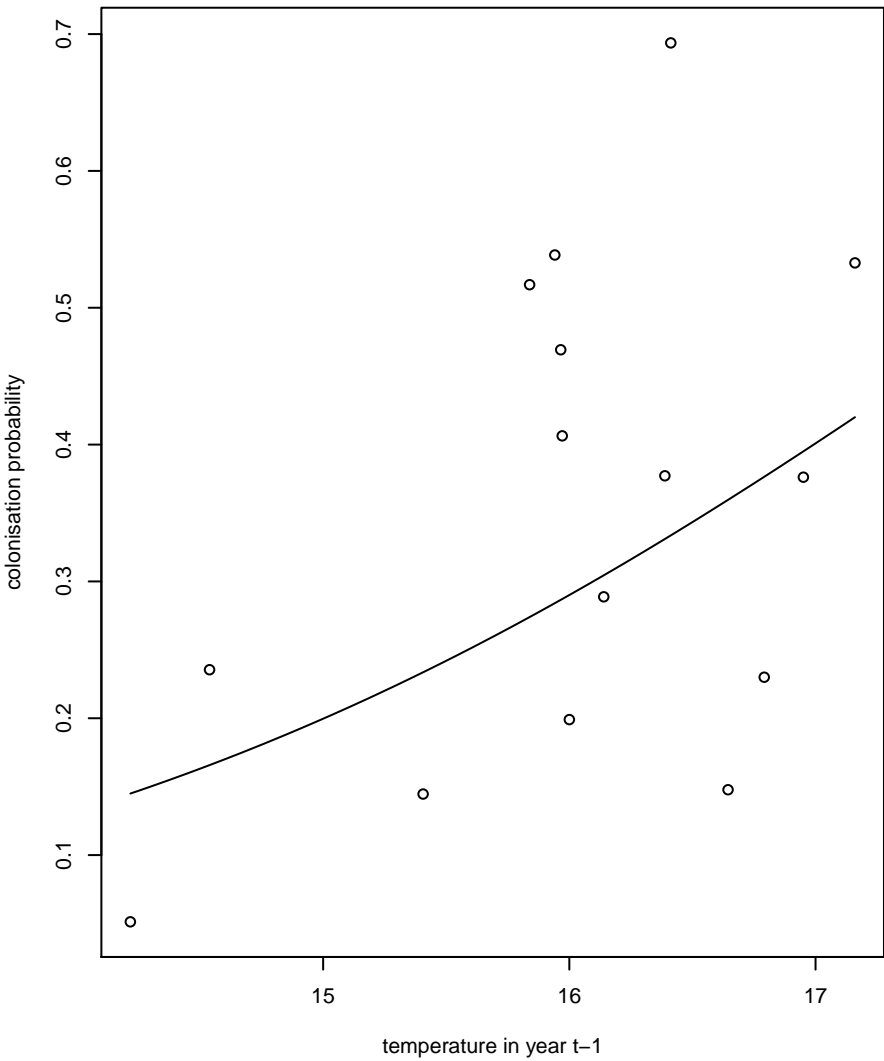

**Papilio machaon**

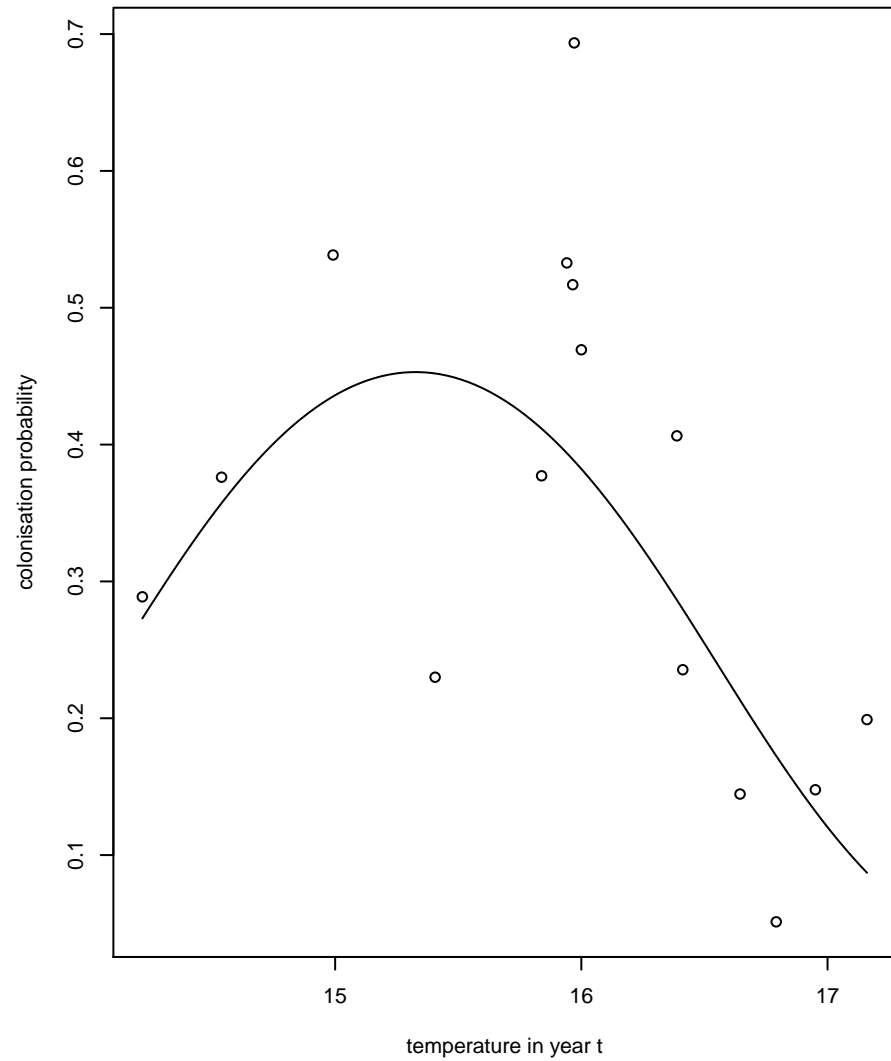

**Carterocephalus palaemon**

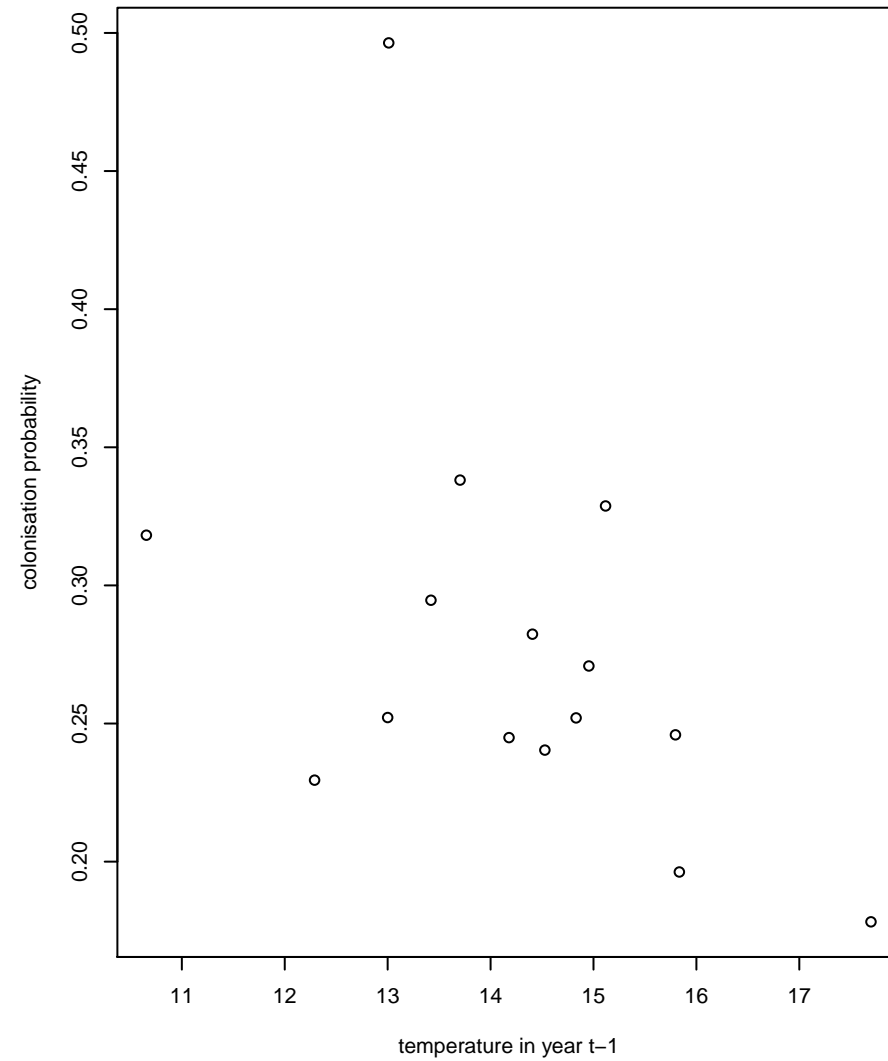

**Carterocephalus palaemon**

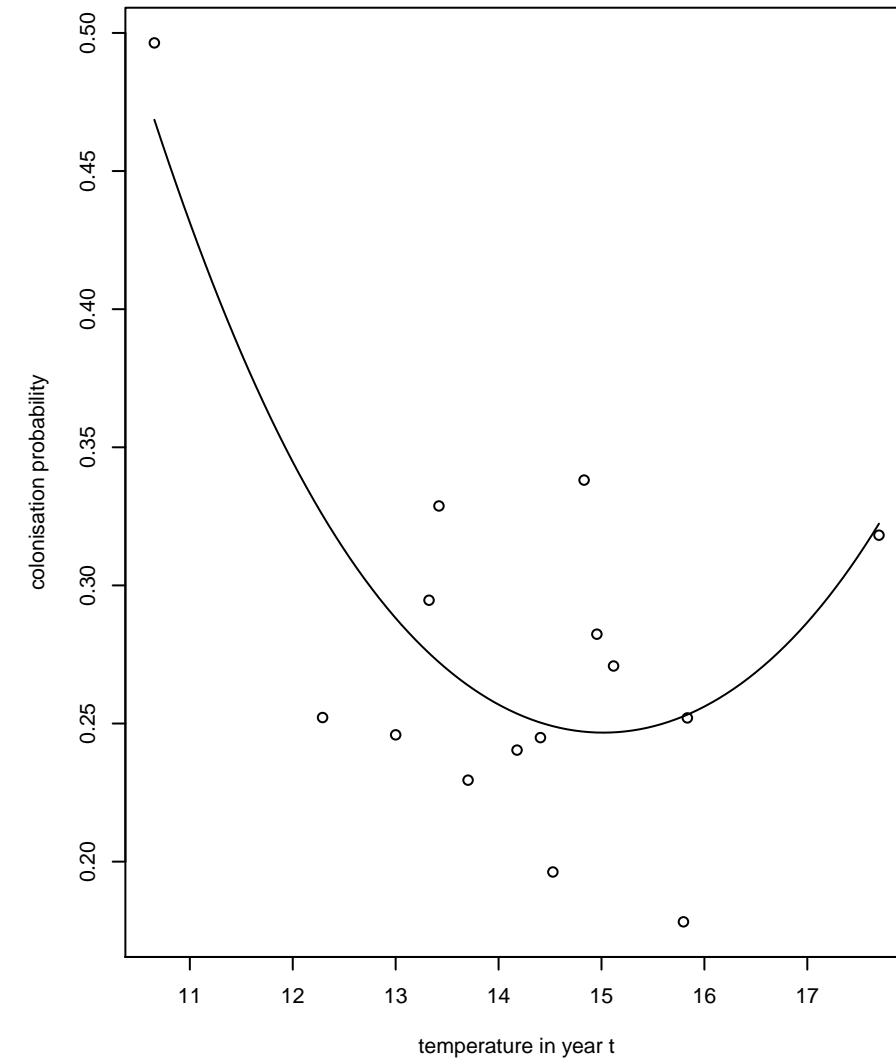

**Gonepteryx rhamni**

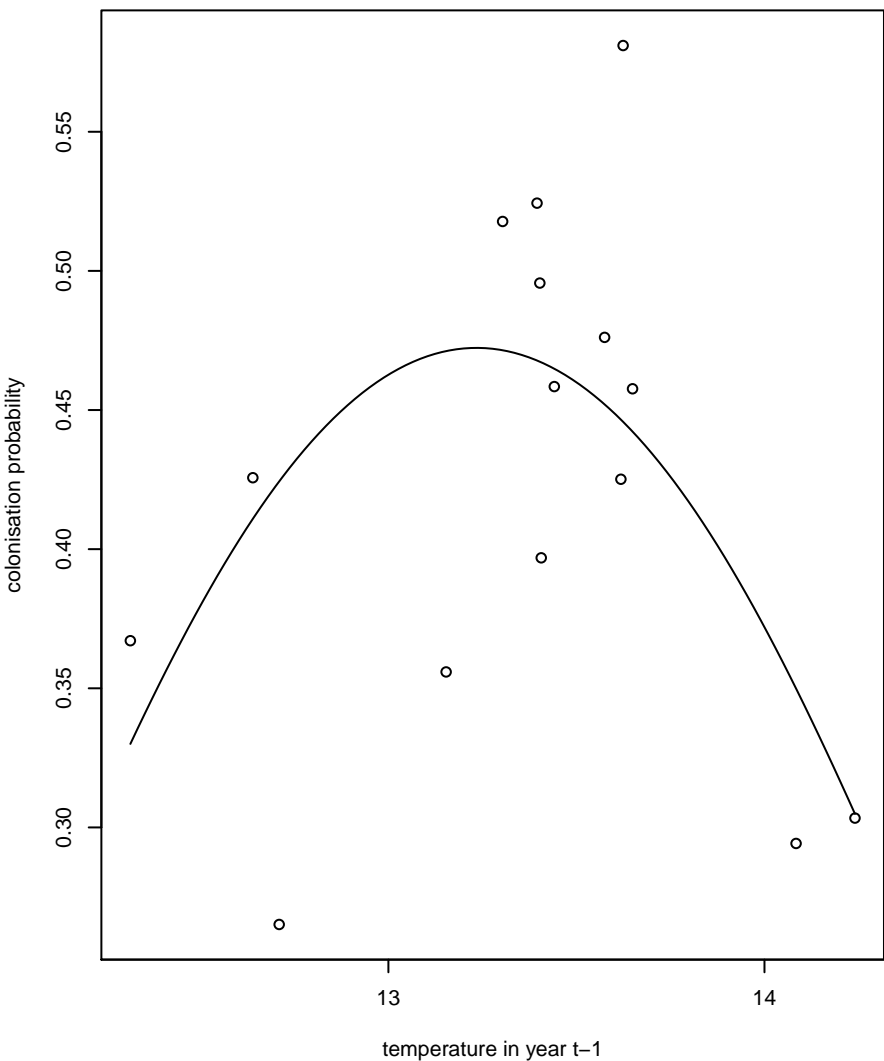

**Gonepteryx rhamni**

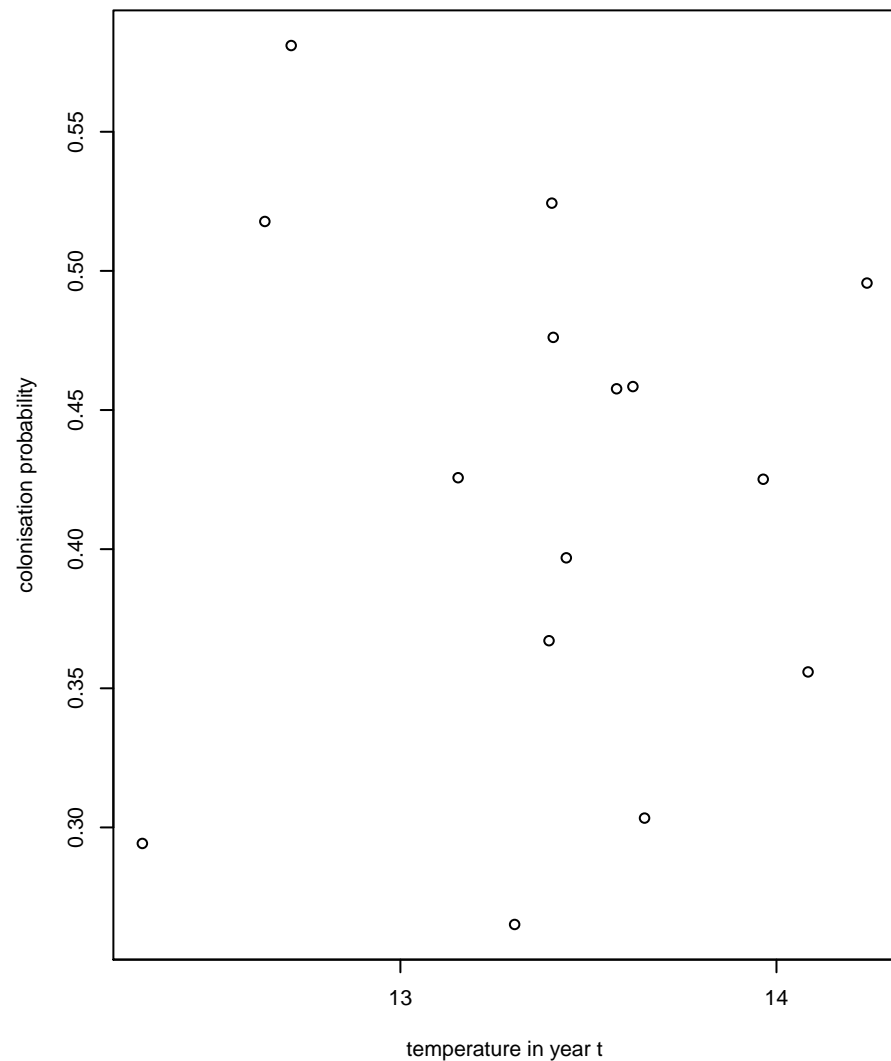

**Pieris brassicae**

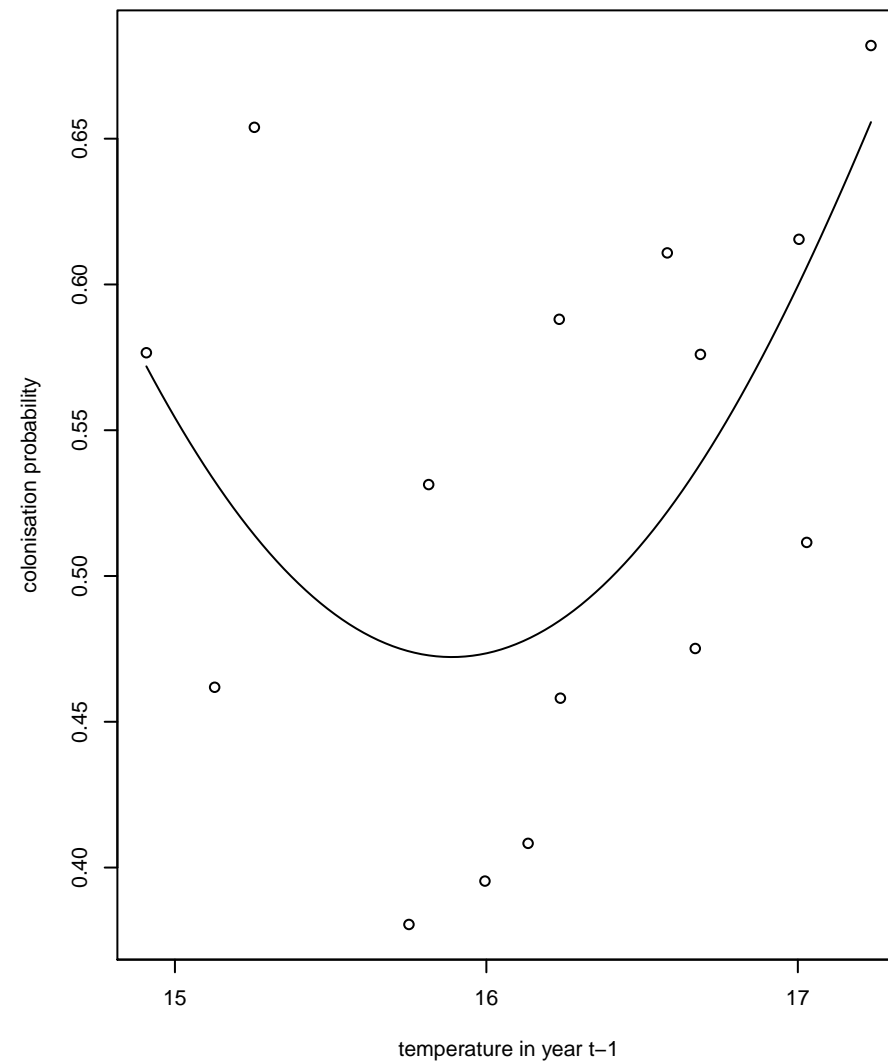

**Pieris brassicae**

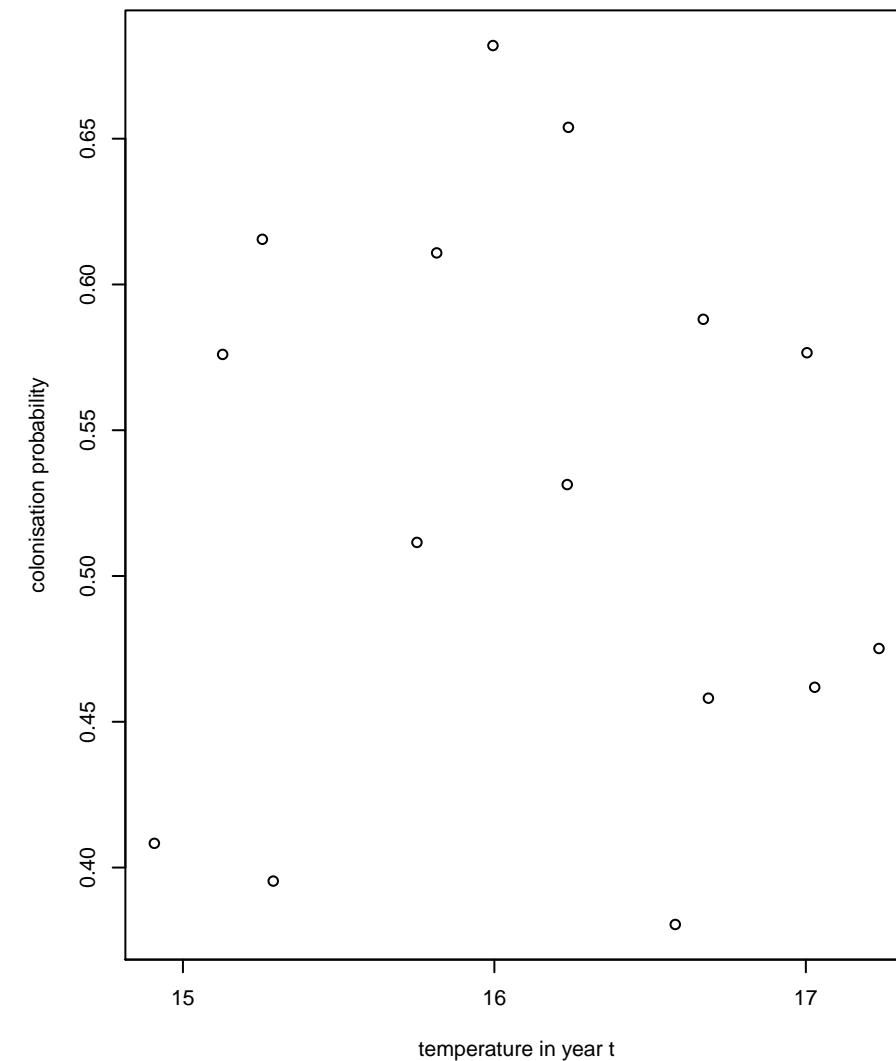

**Thymelicus sylvestris**

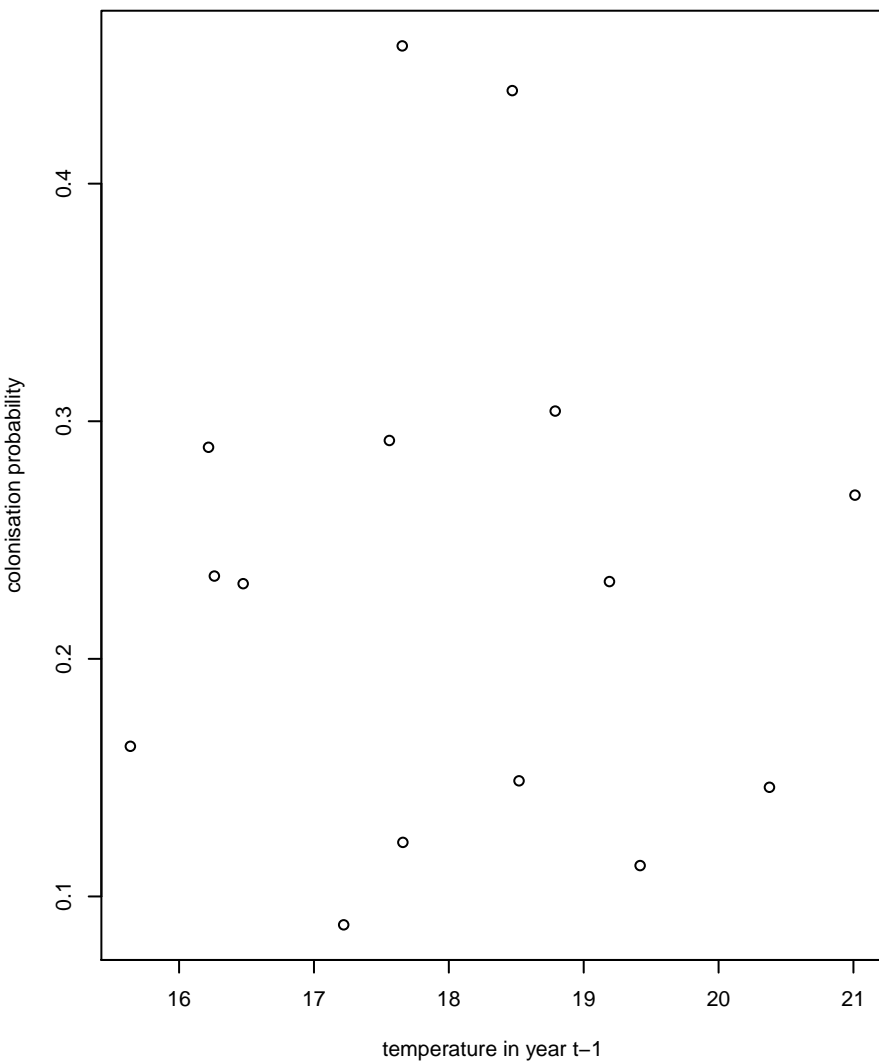

**Thymelicus sylvestris**

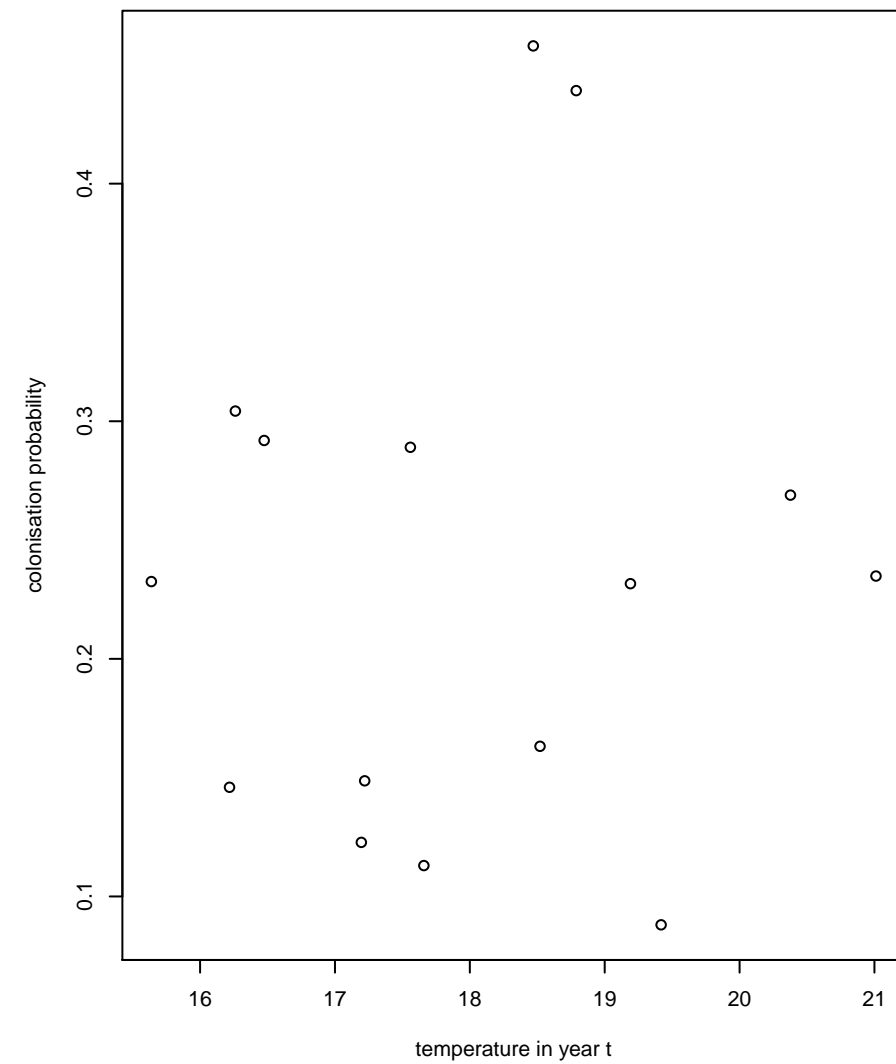

**Pieris rapae**

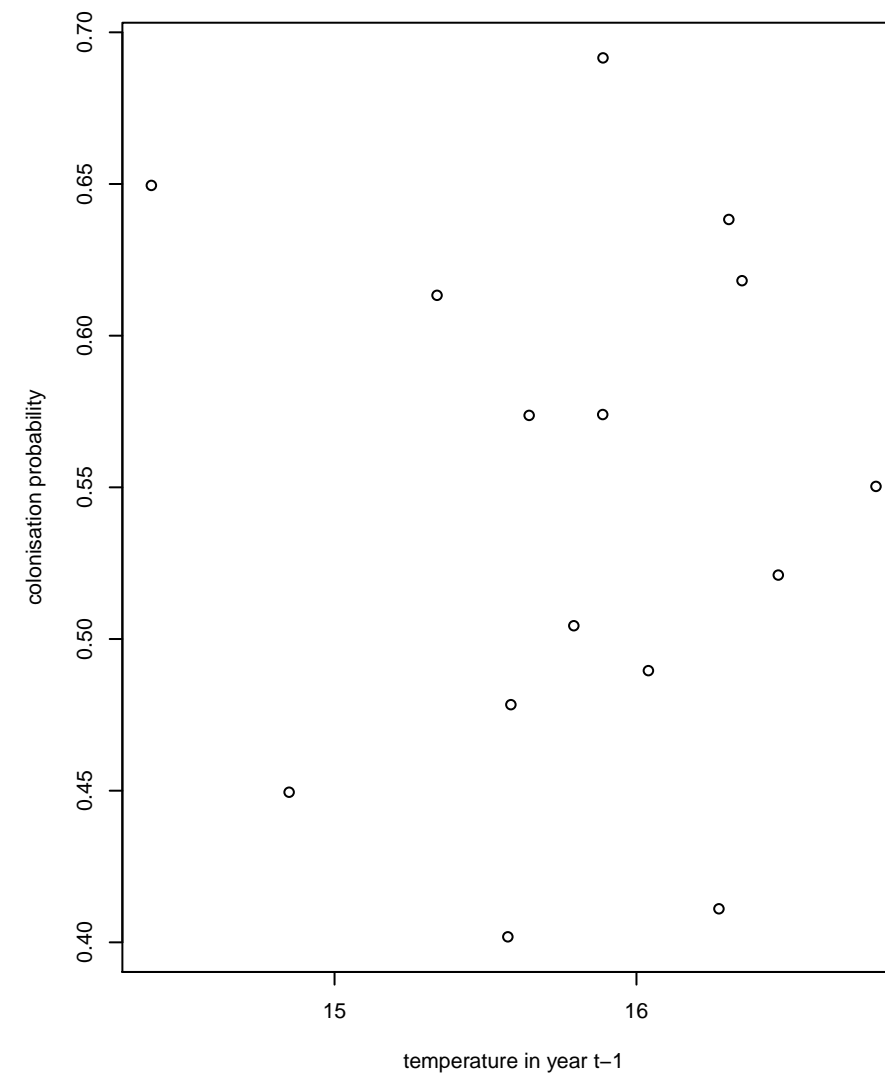

**Pieris rapae**

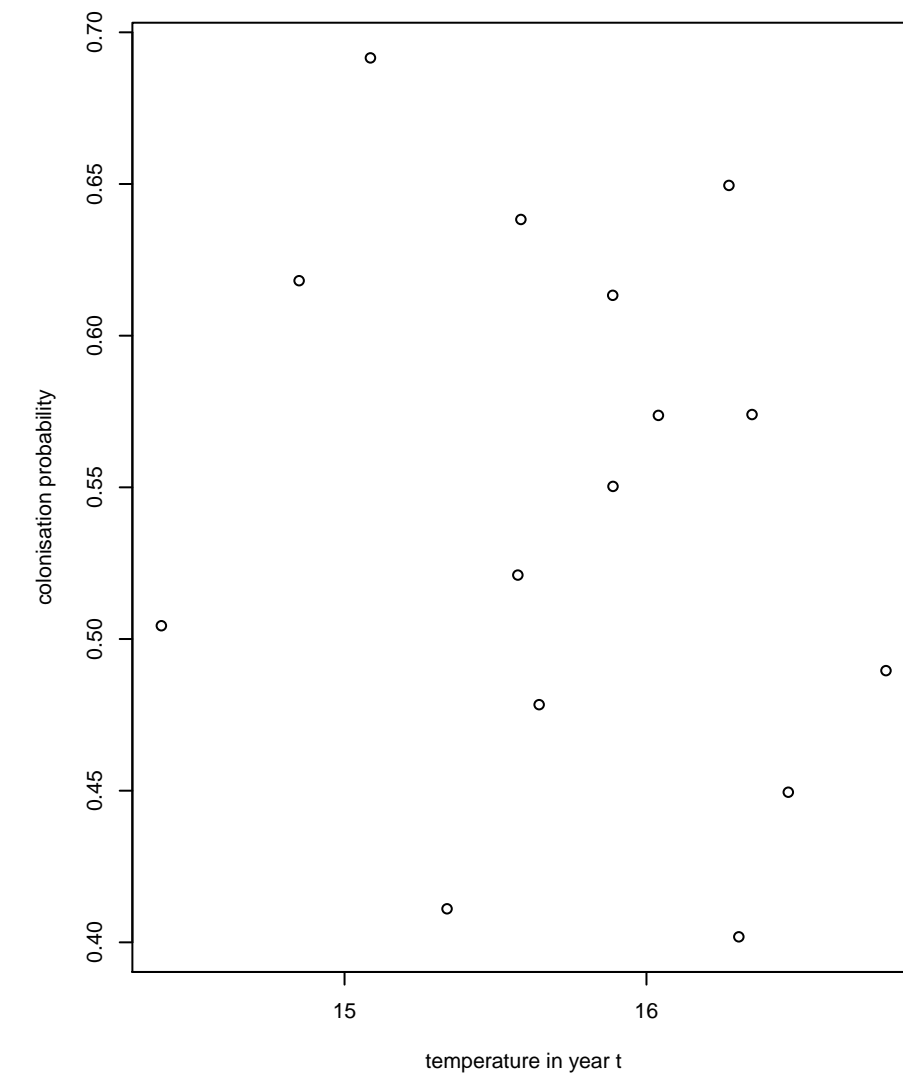

**Pieris napi**

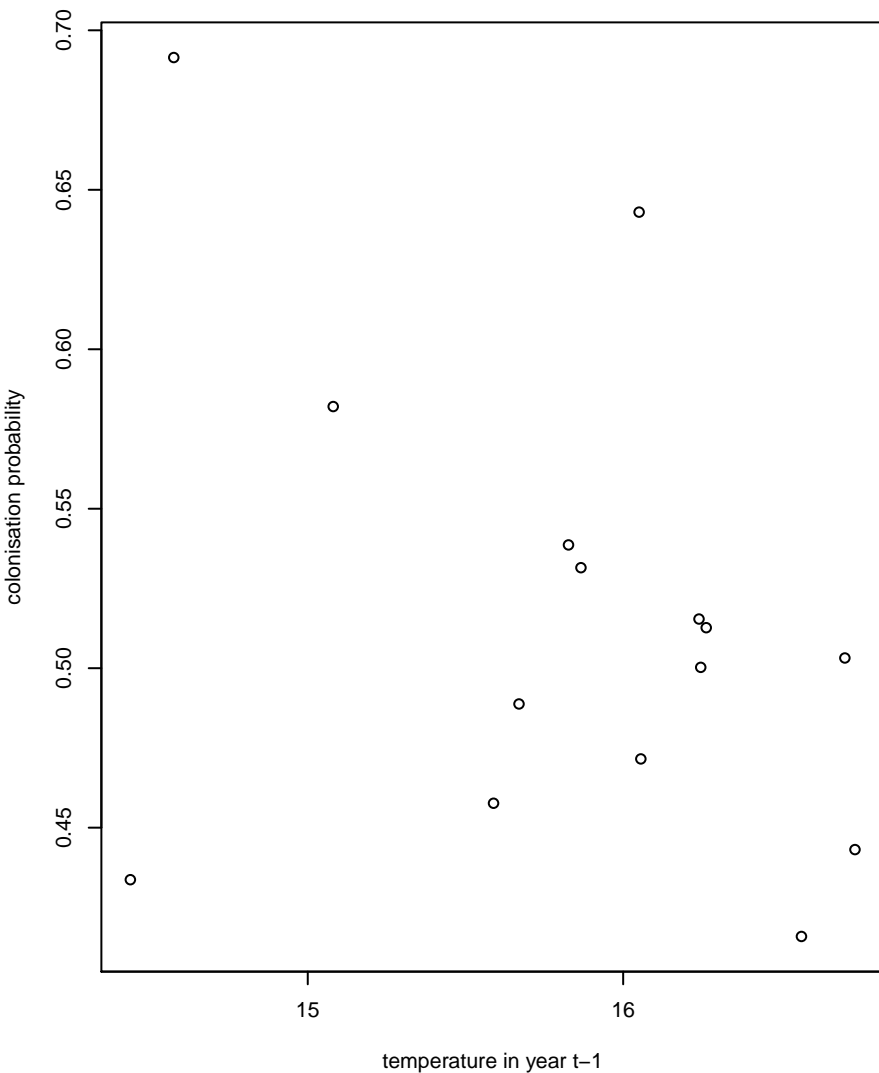

**Pieris napi**

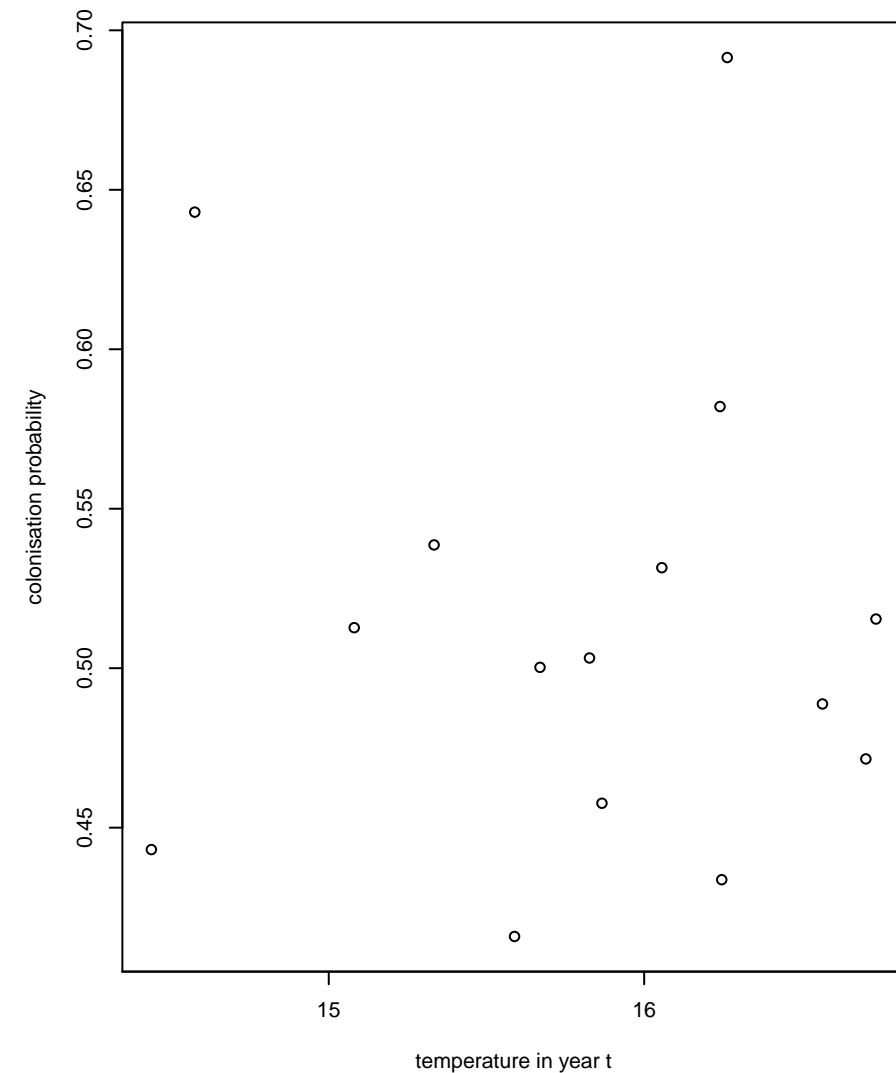

**Anthocharis cardamines**

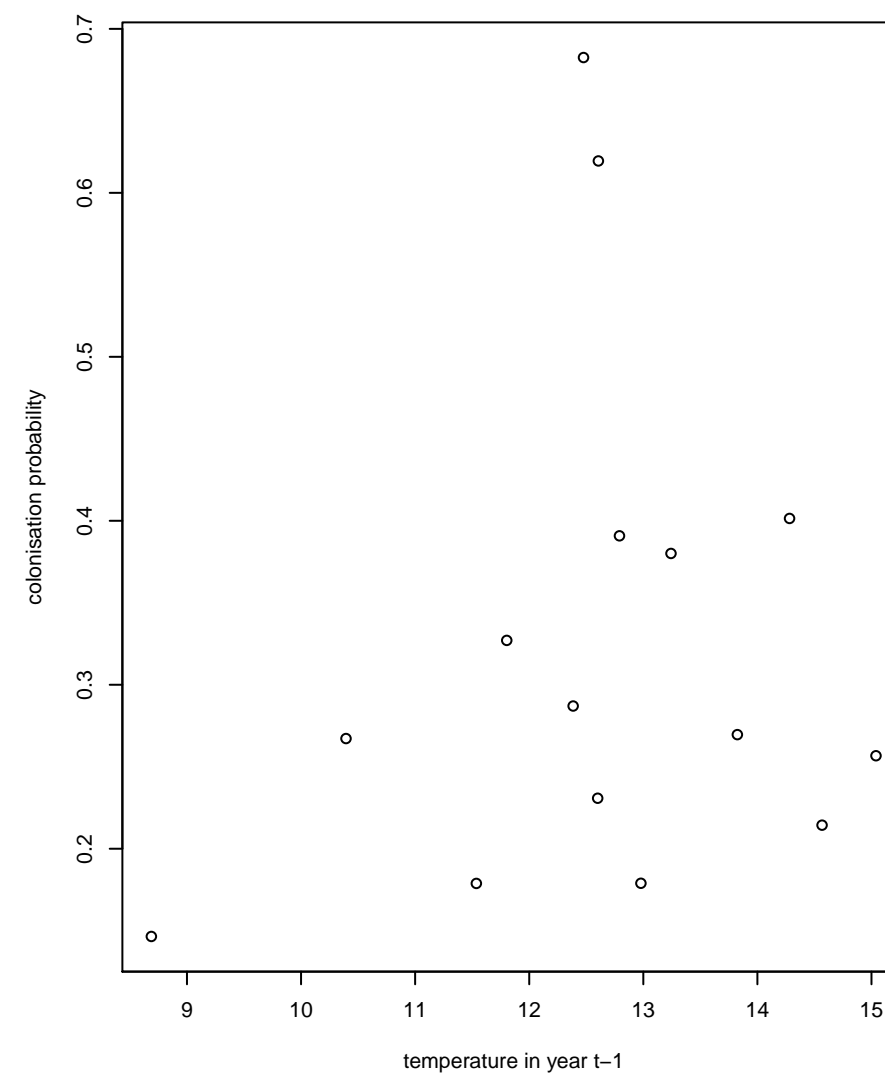

**Anthocharis cardamines**

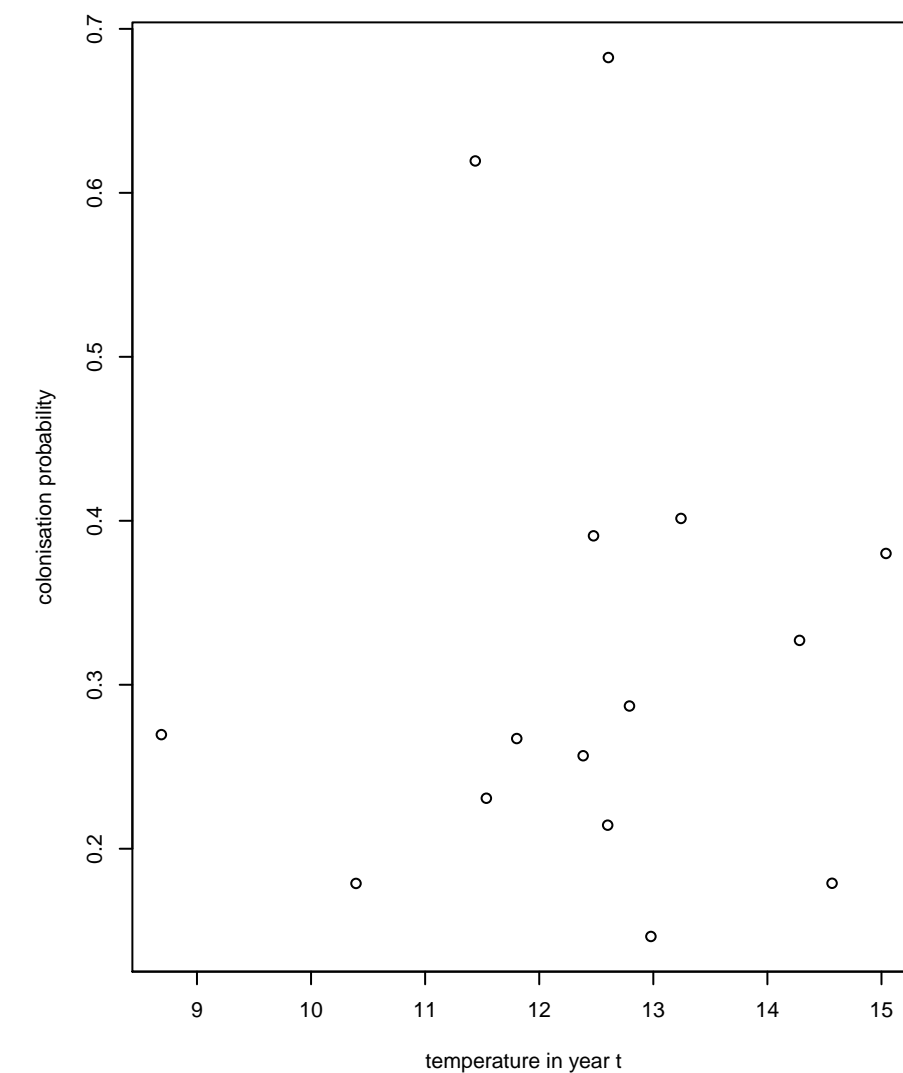

**Callophrys rubi**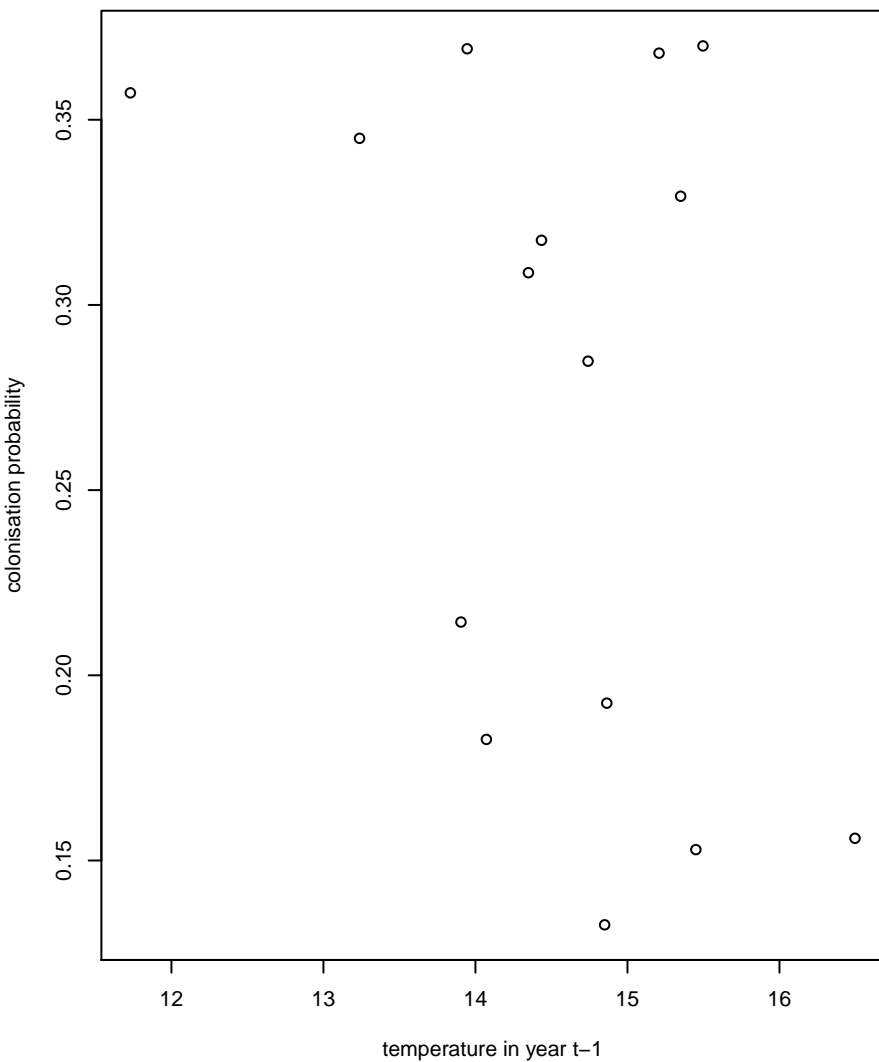**Callophrys rubi**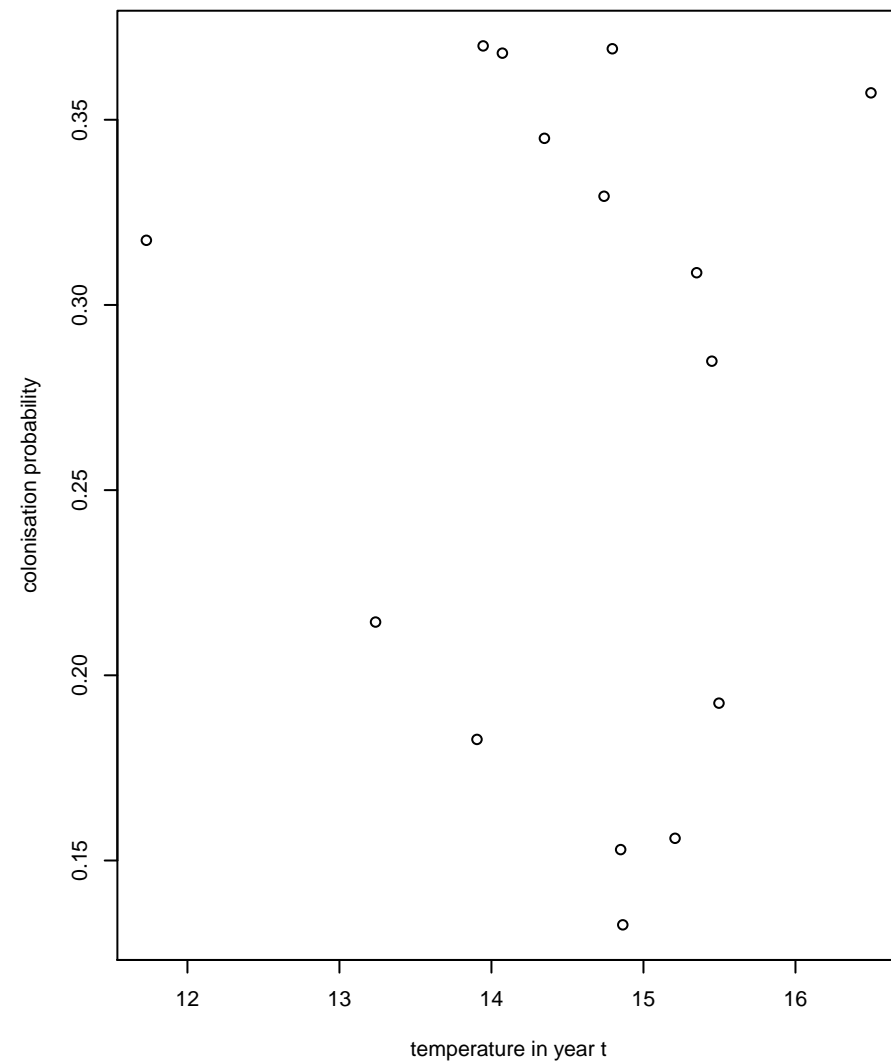**Favonius quercus**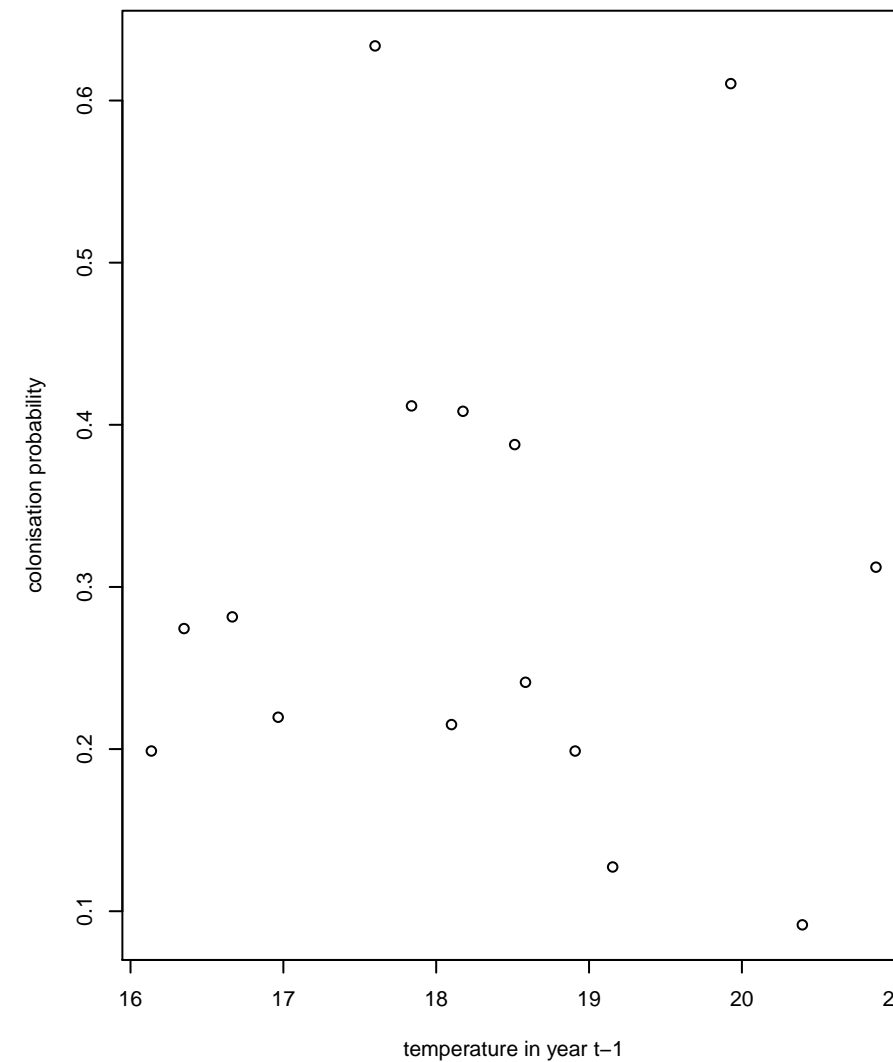**Favonius quercus**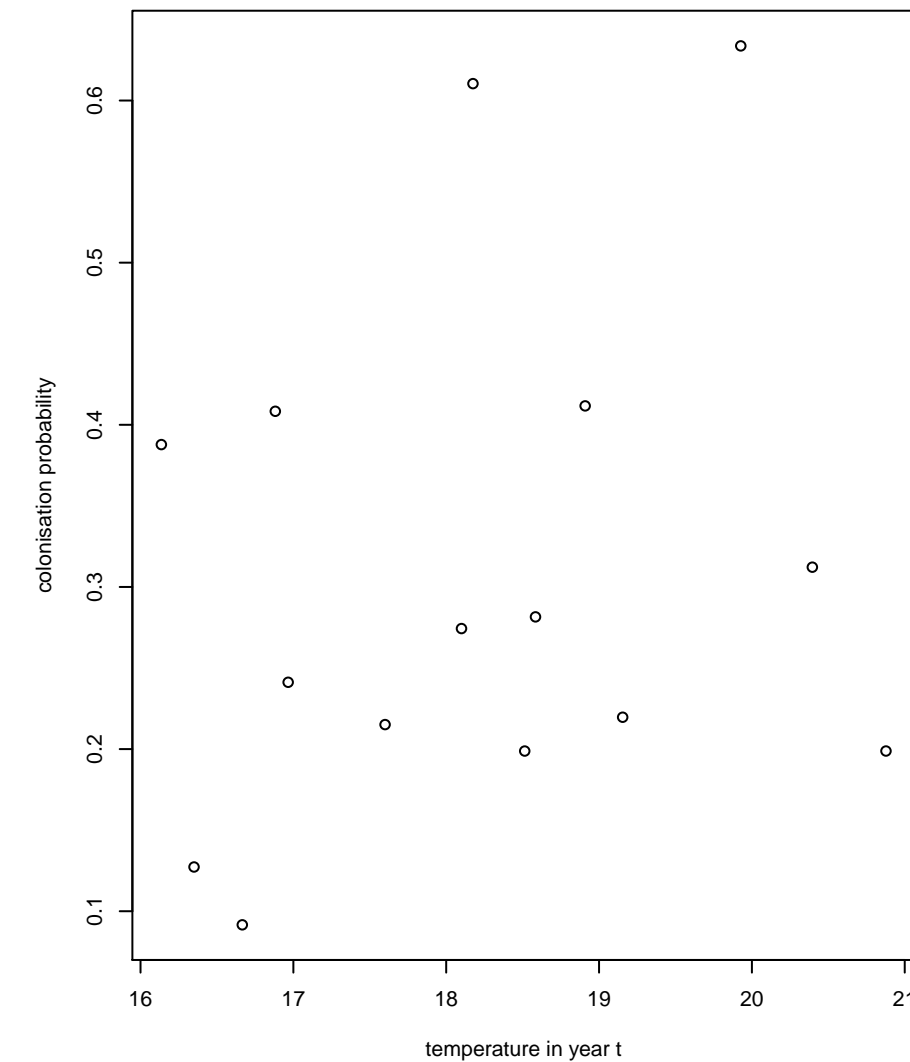**Satyrium ilicis**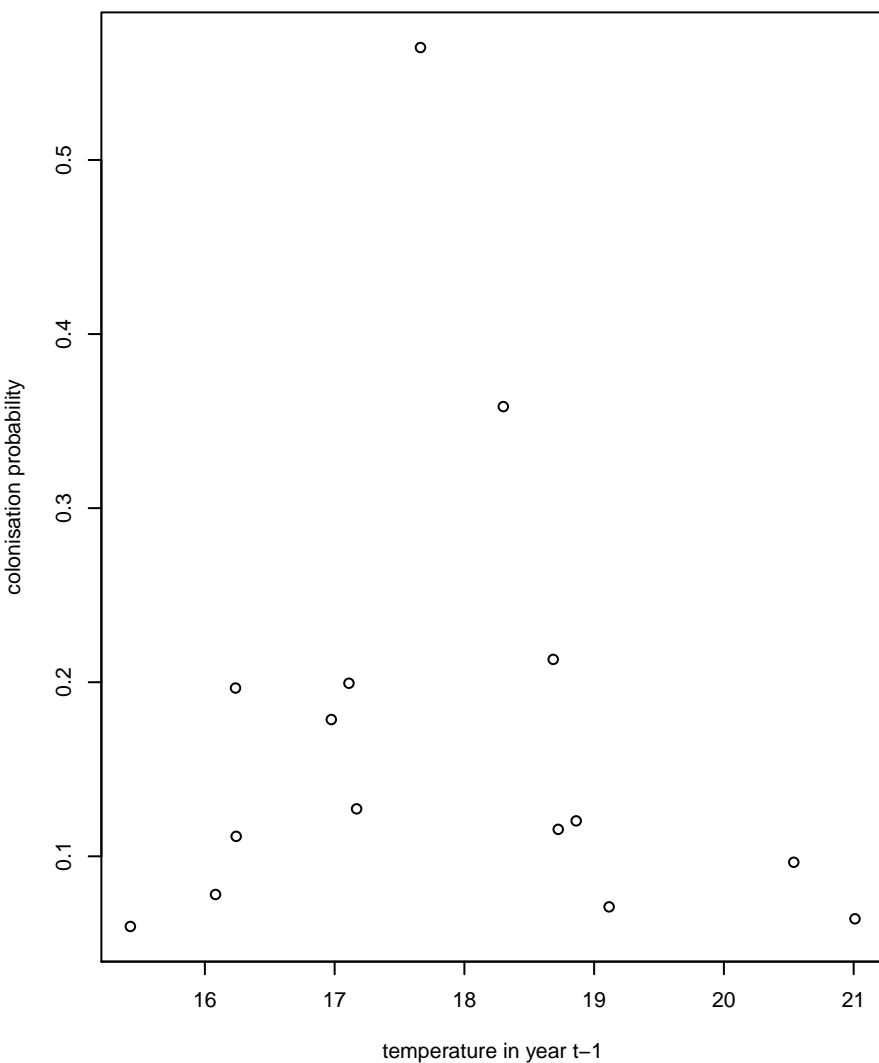**Satyrium ilicis**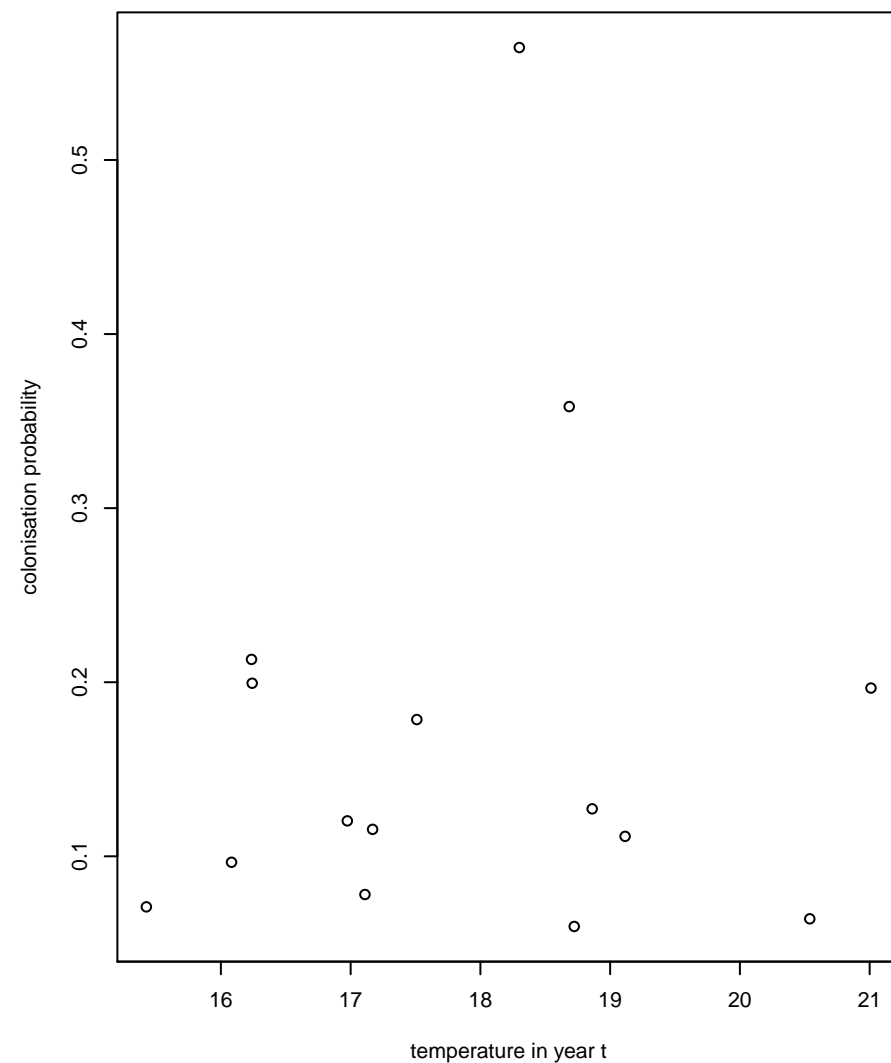**Thymelicus lineola**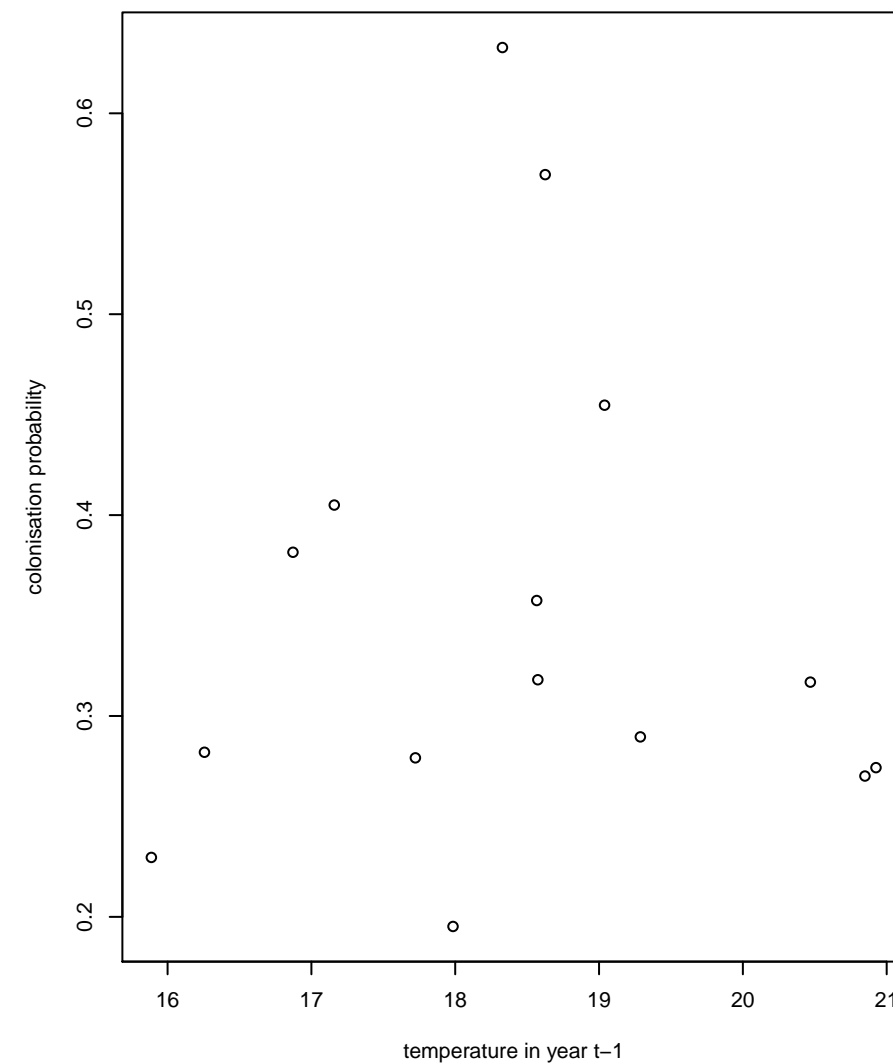**Thymelicus lineola**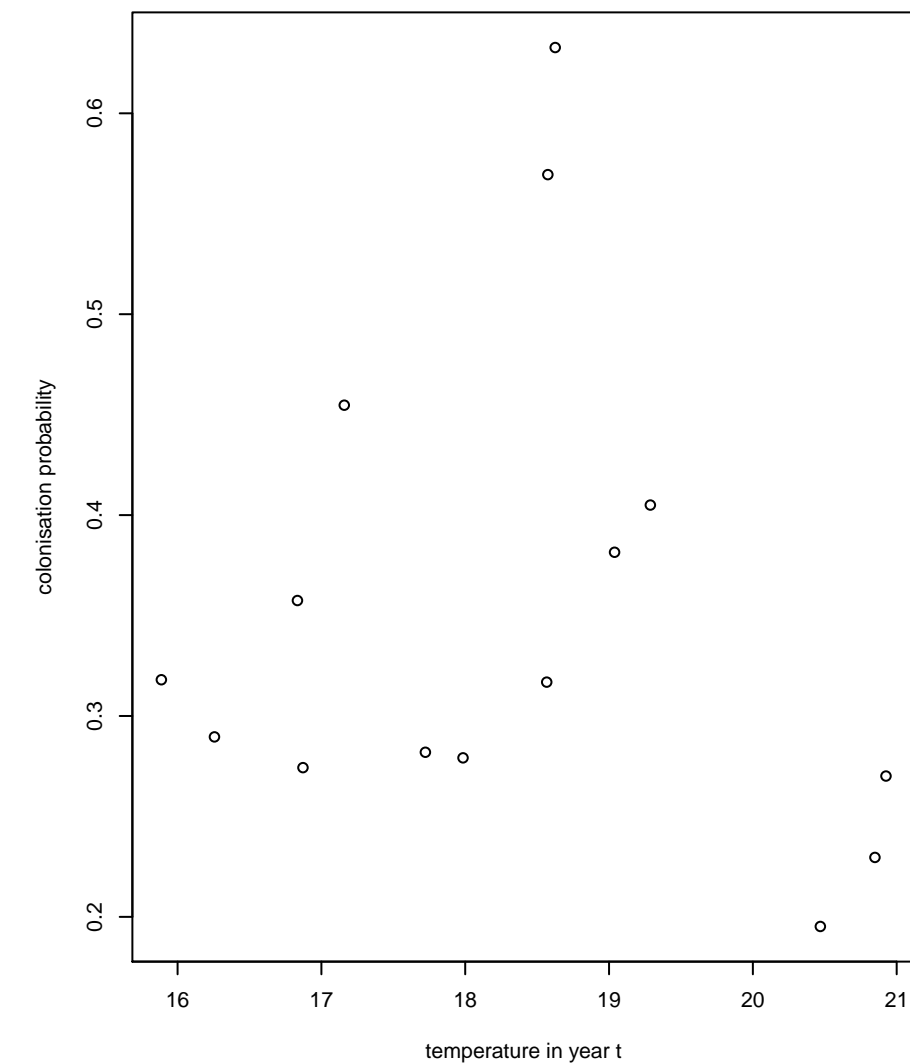

**Lycaena phlaeas**

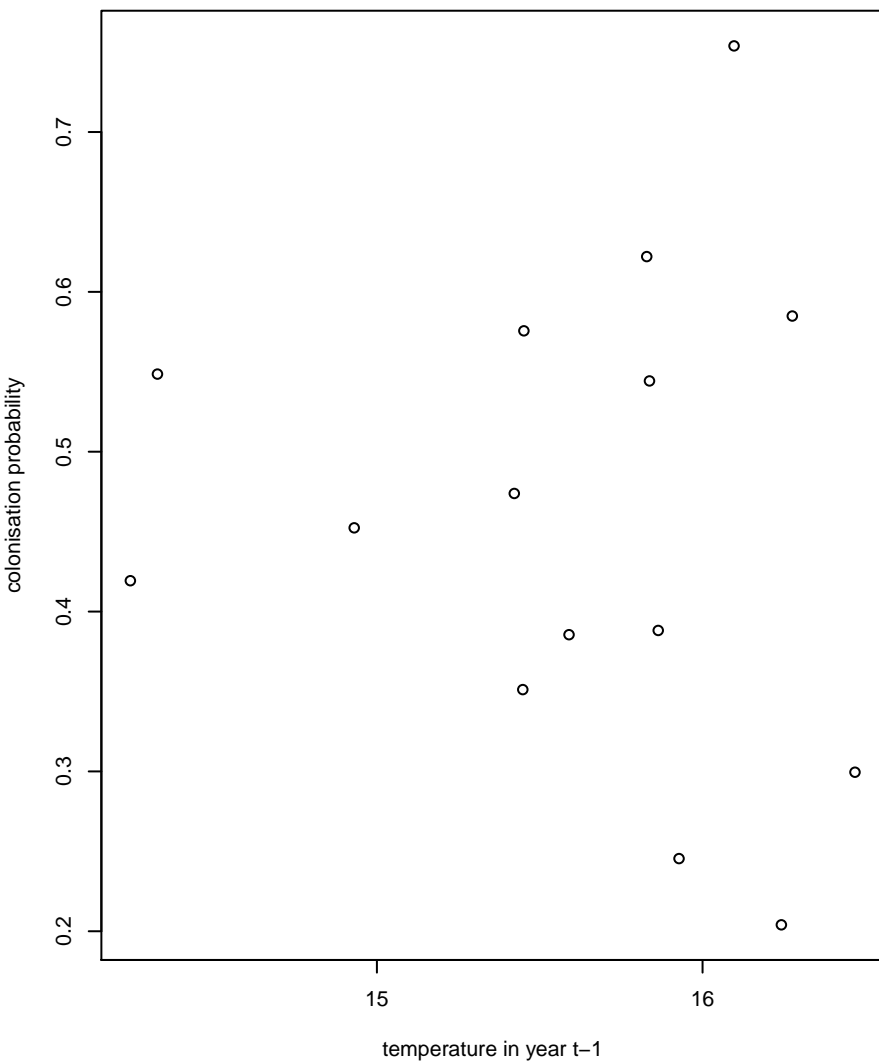

**Lycaena phlaeas**

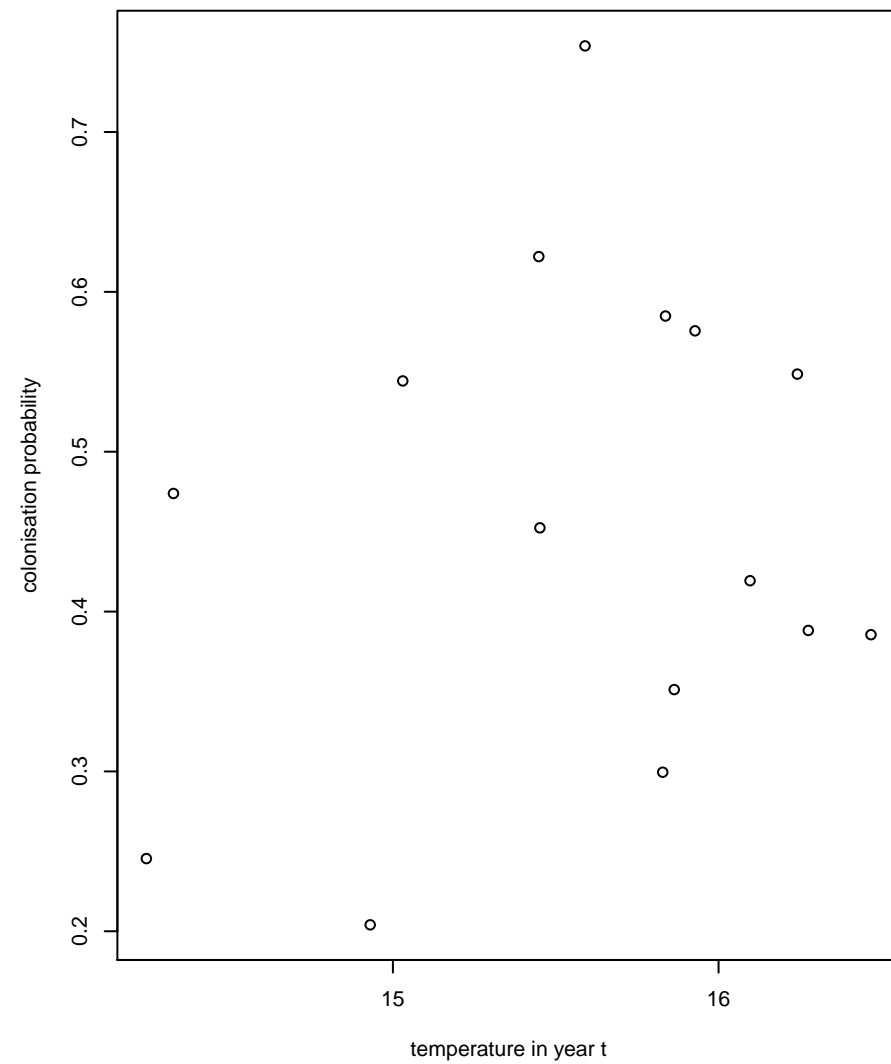

**Lycaena tityrus**

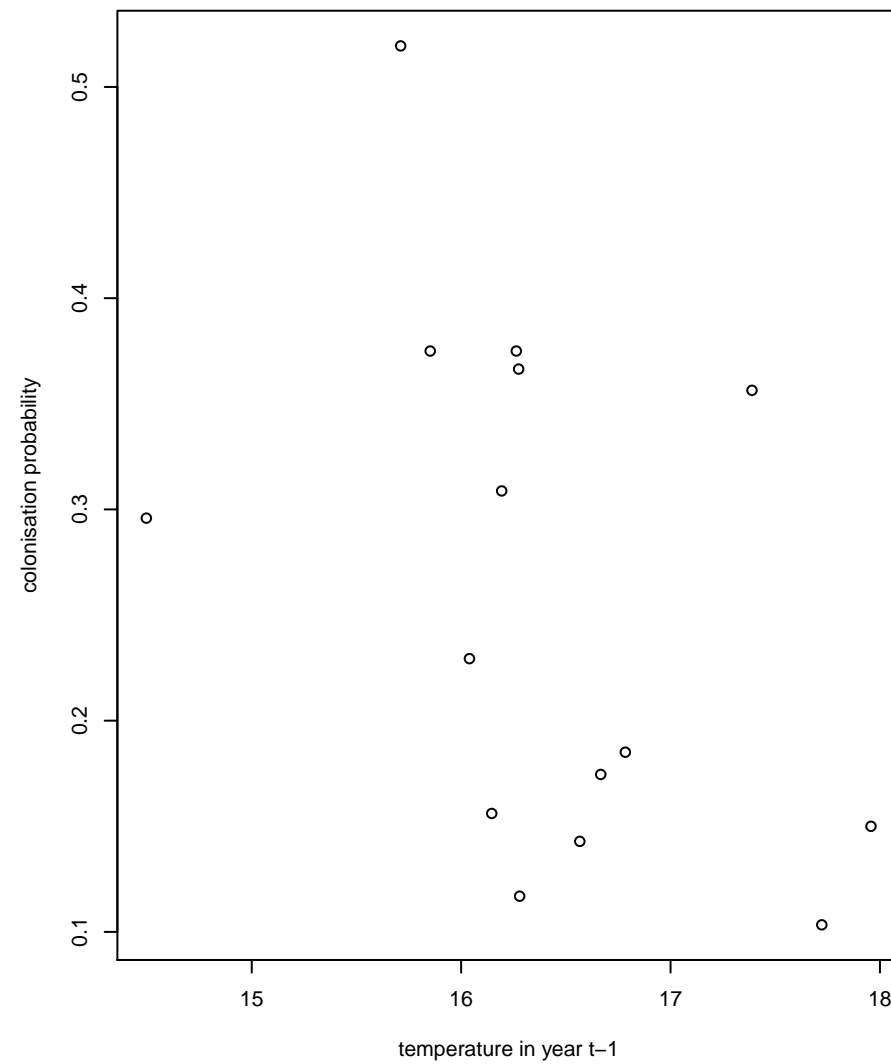

**Lycaena tityrus**

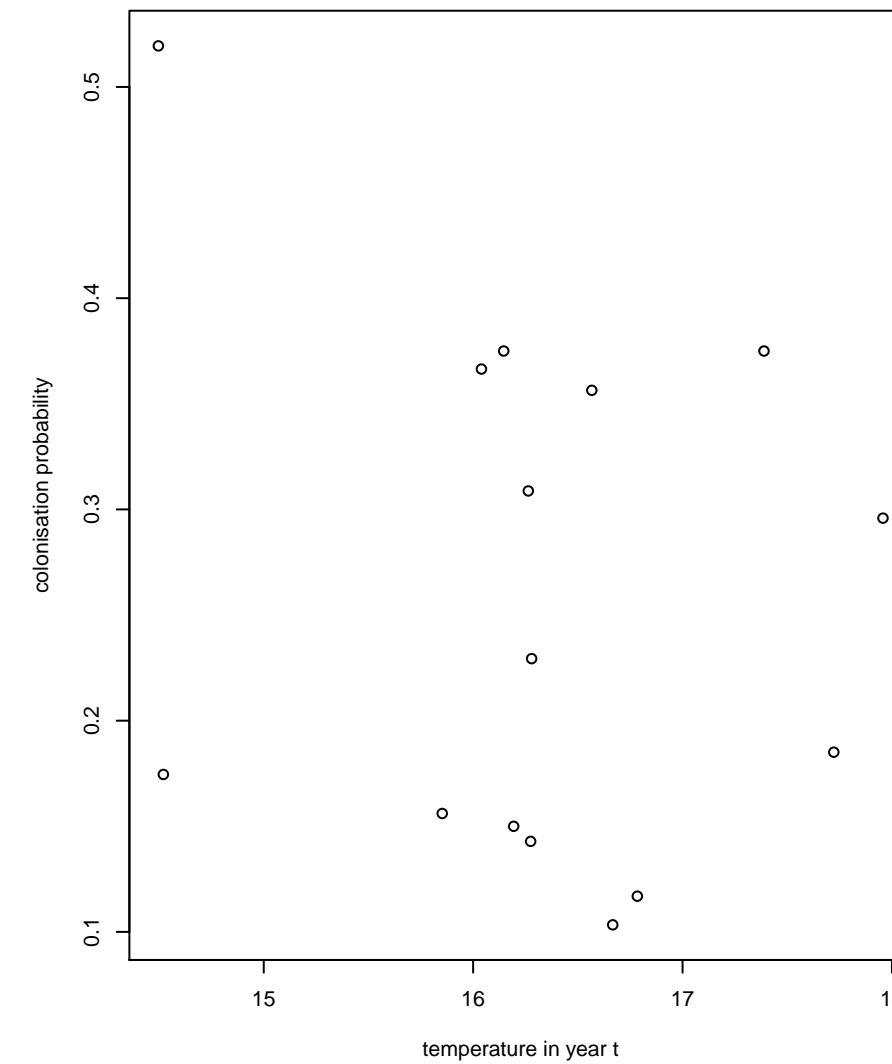

**Plebejus argus**

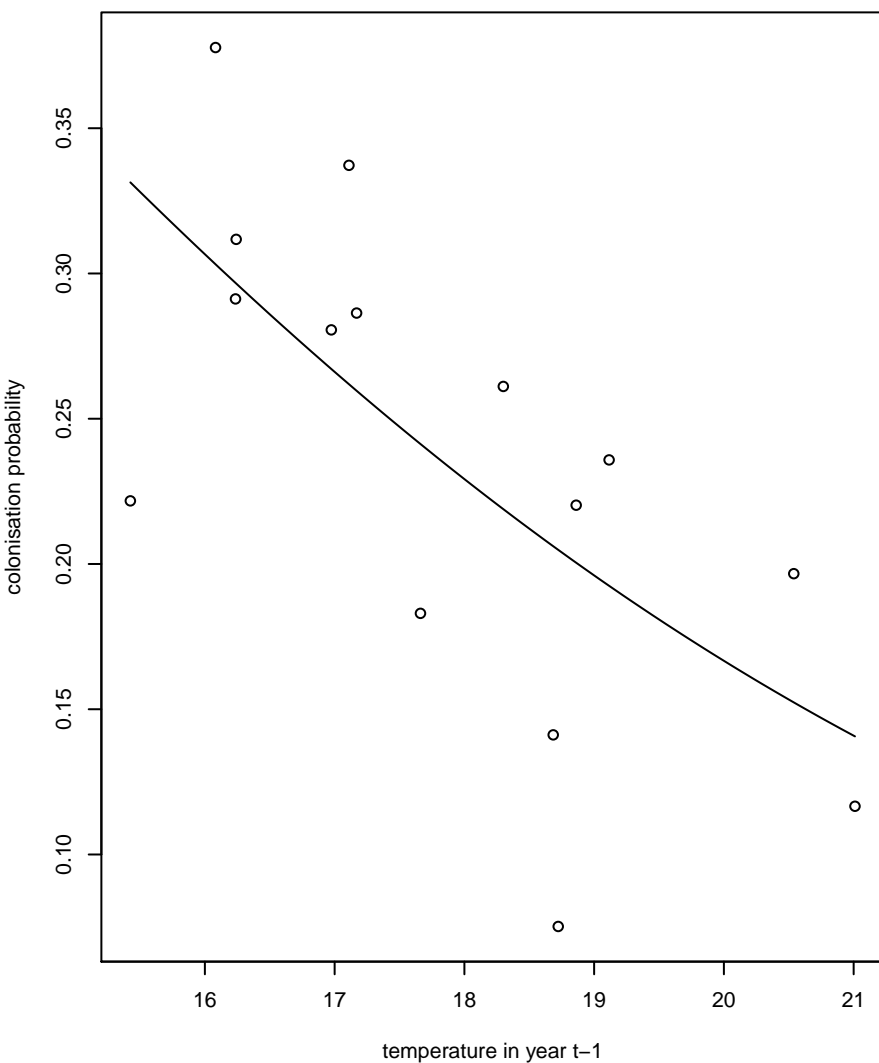

**Plebejus argus**

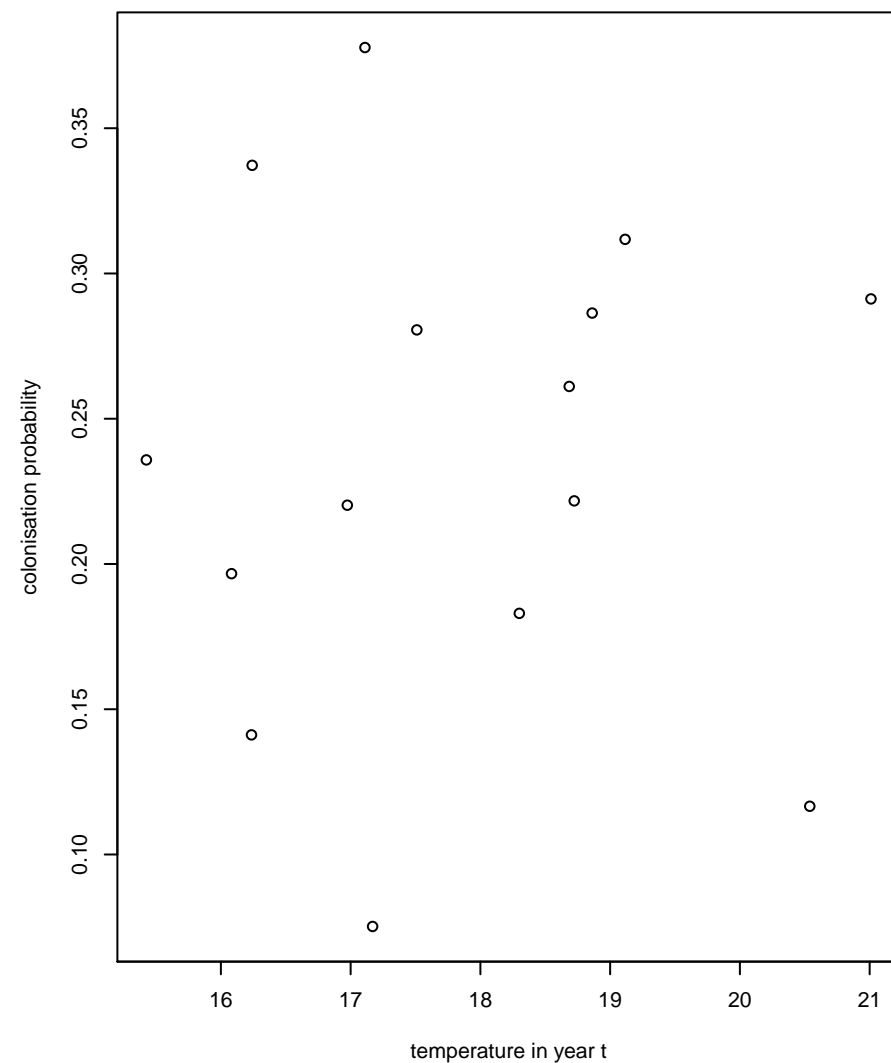

**Aricia agestis**

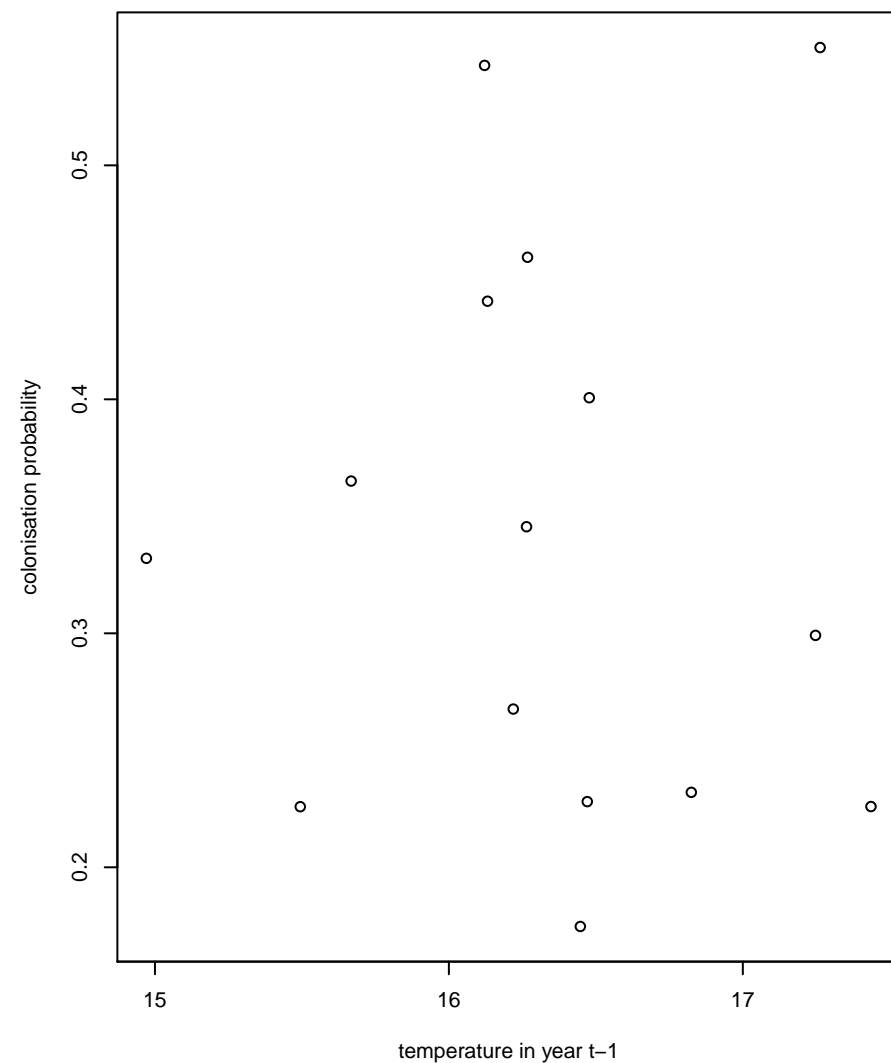

**Aricia agestis**

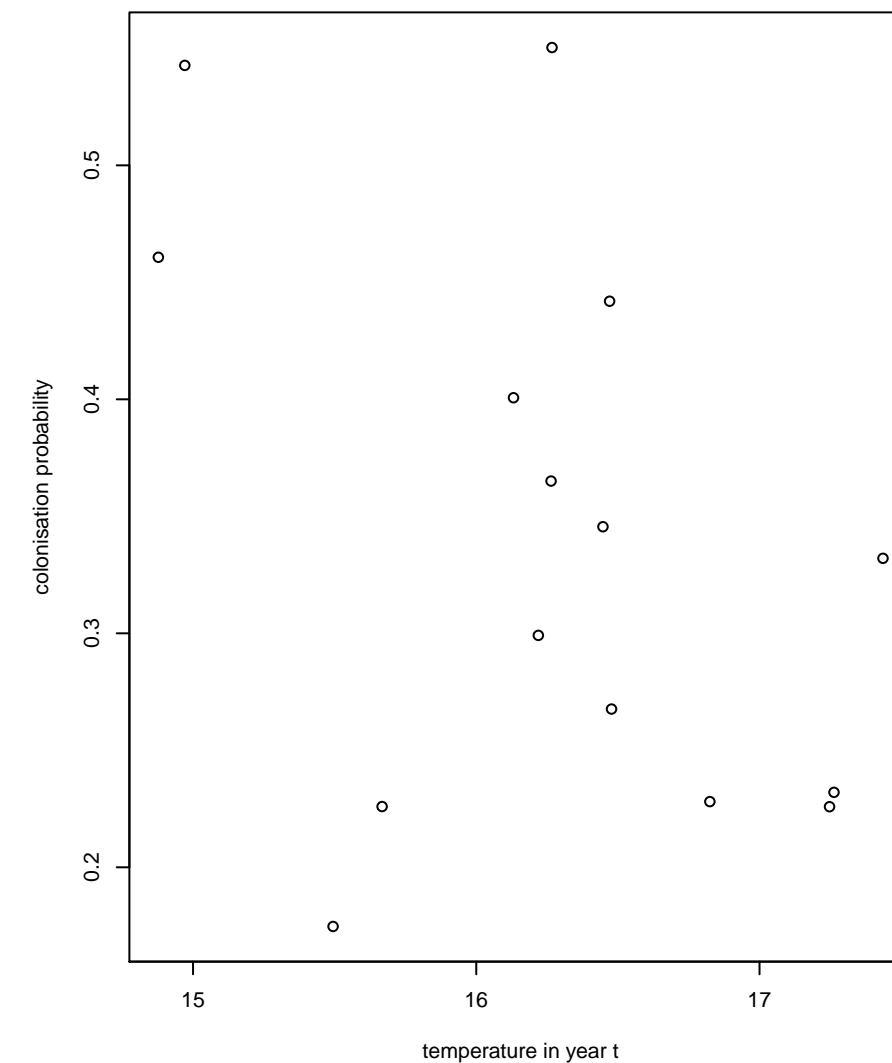

**Polyommatus icarus**

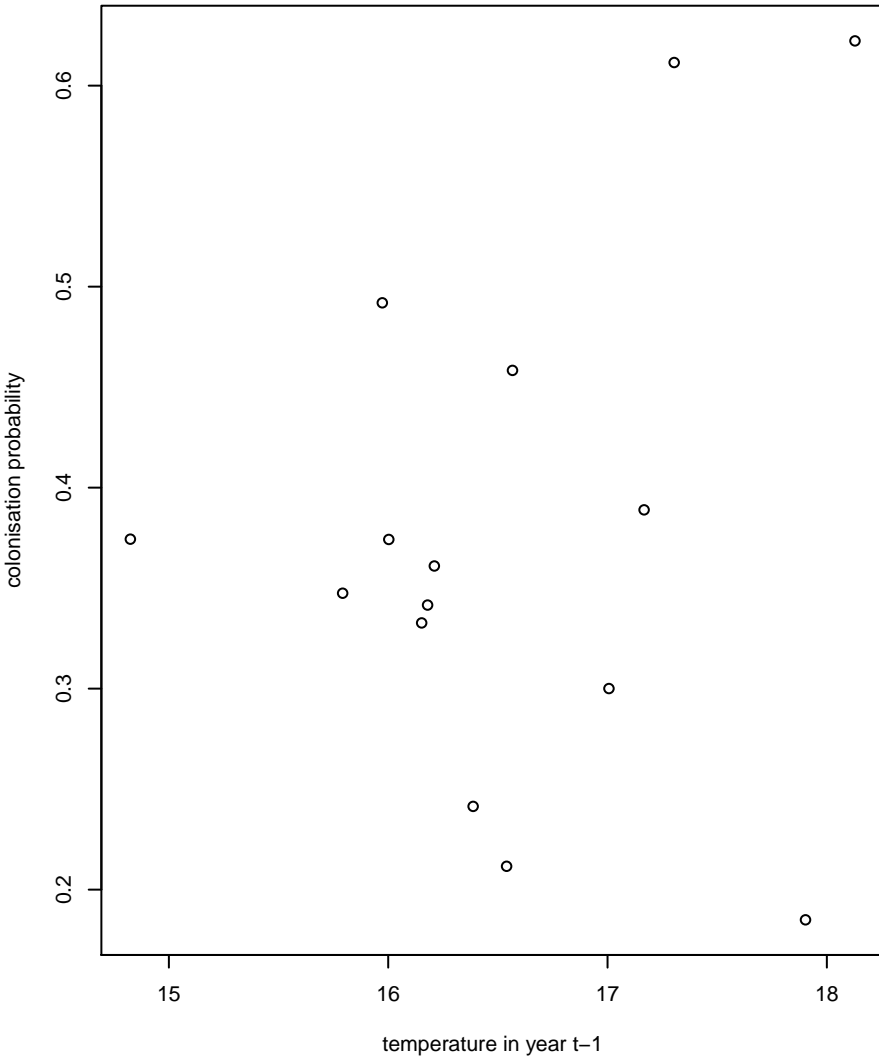

**Polyommatus icarus**

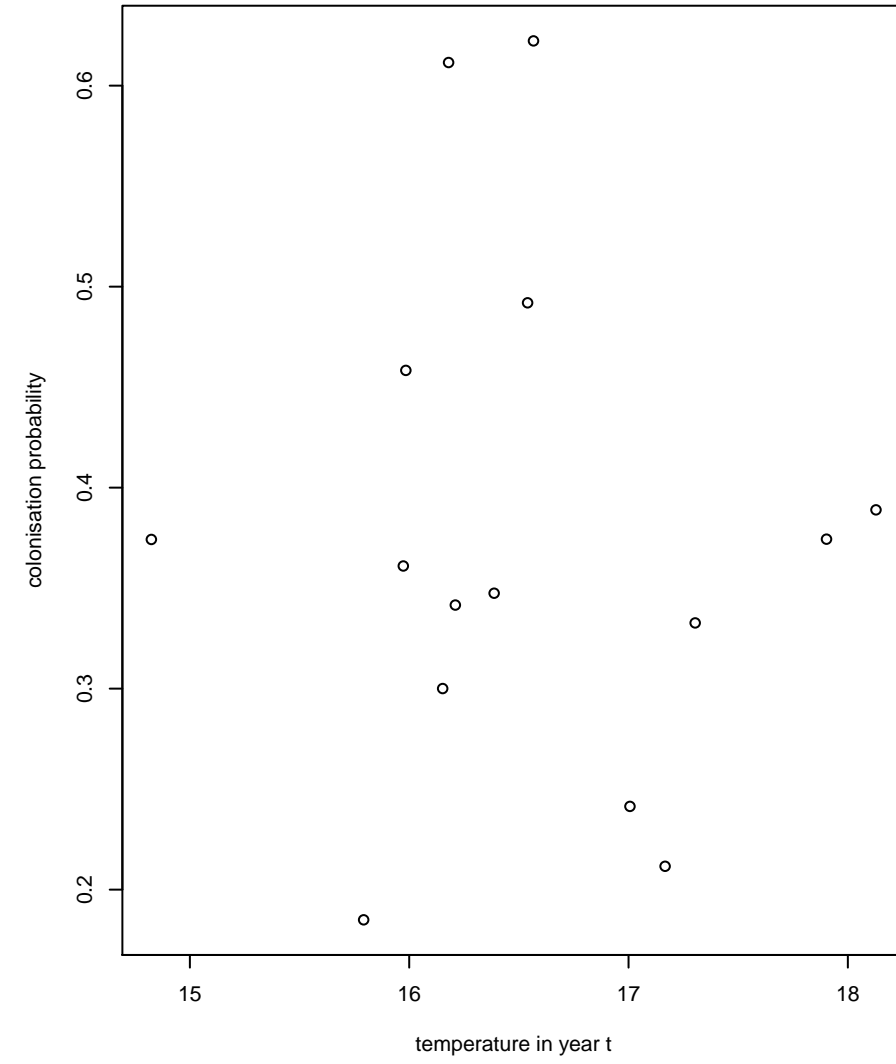

**Celastrina argiolus**

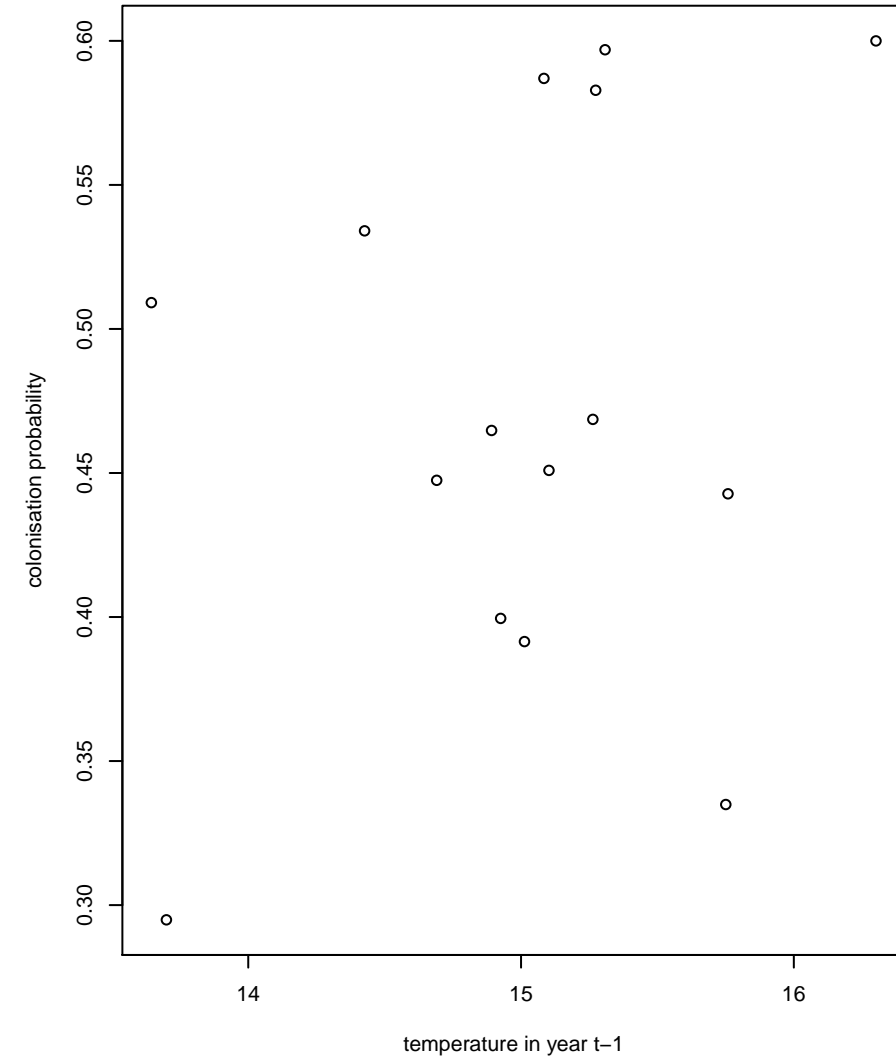

**Celastrina argiolus**

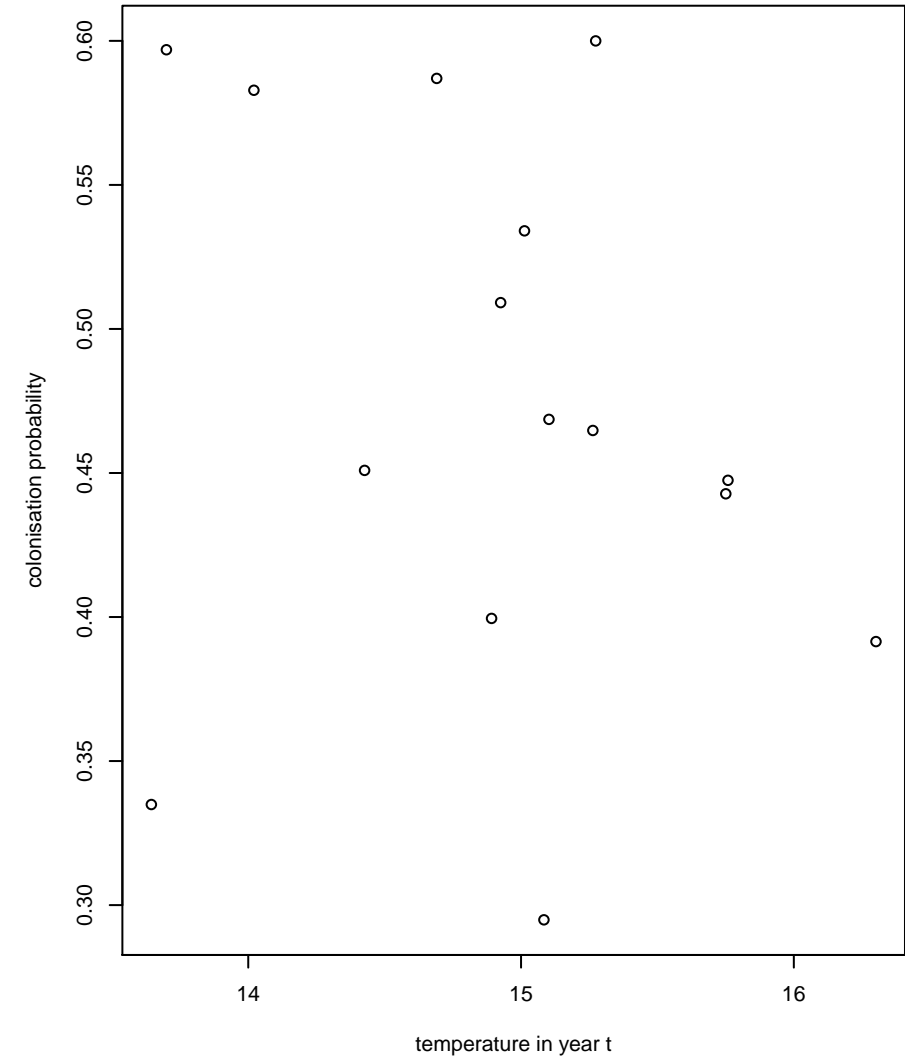

**Hesperia comma**

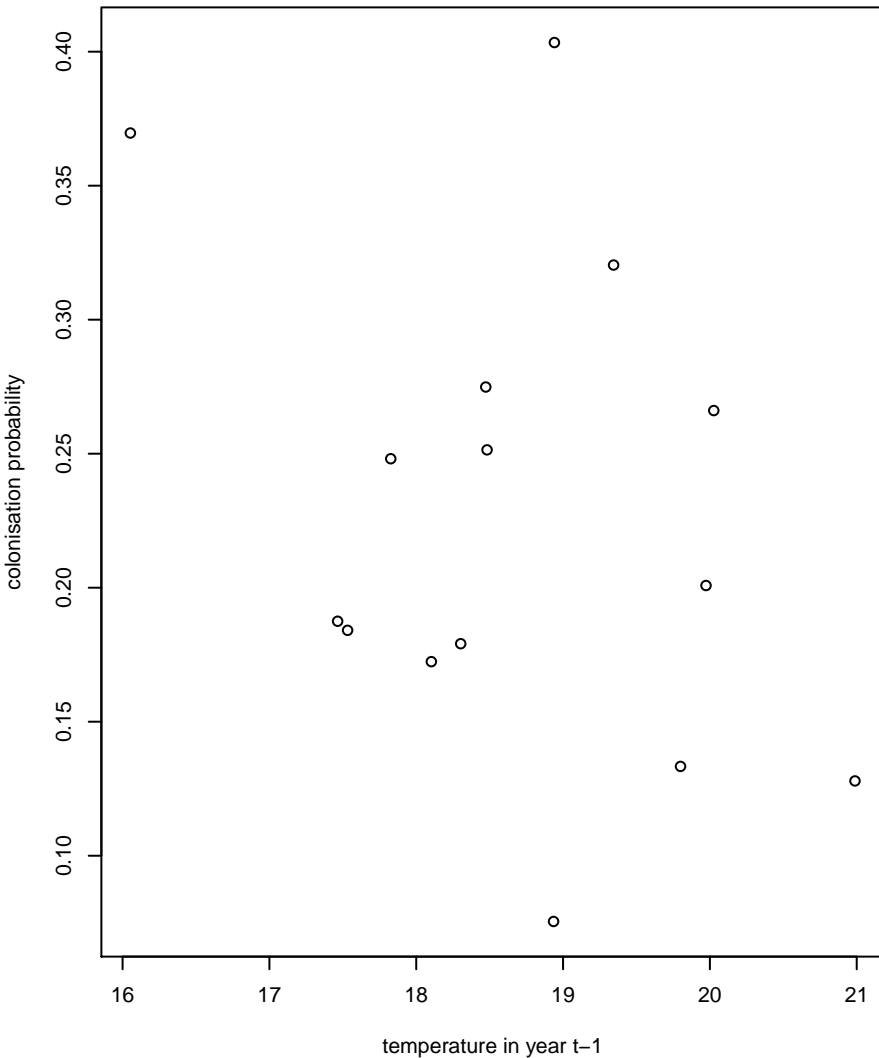

**Hesperia comma**

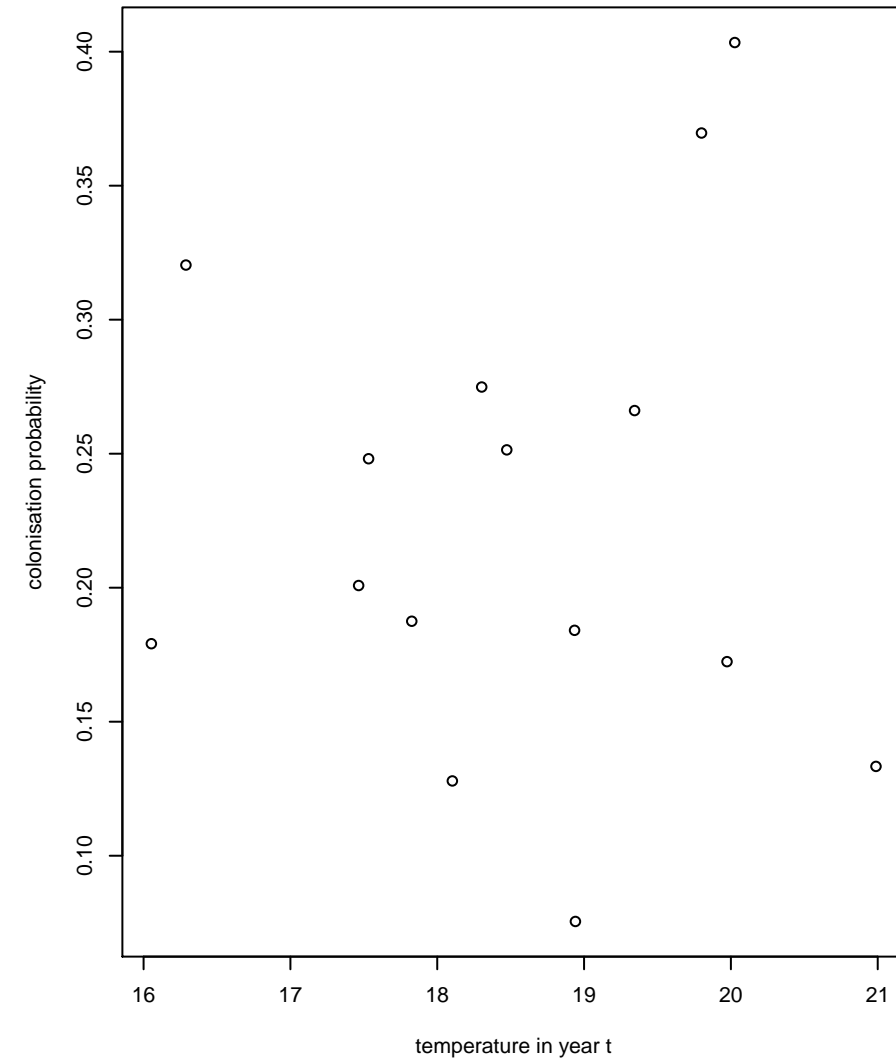

**Limnitis camilla**

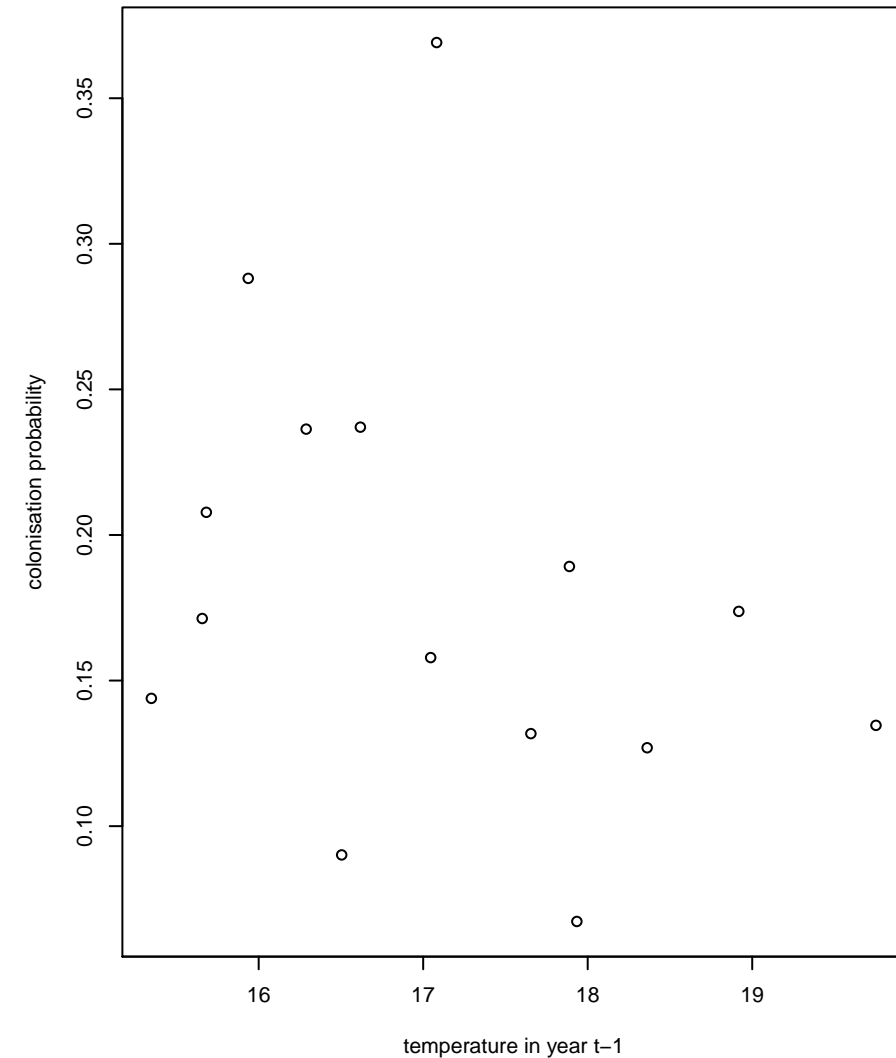

**Limnitis camilla**

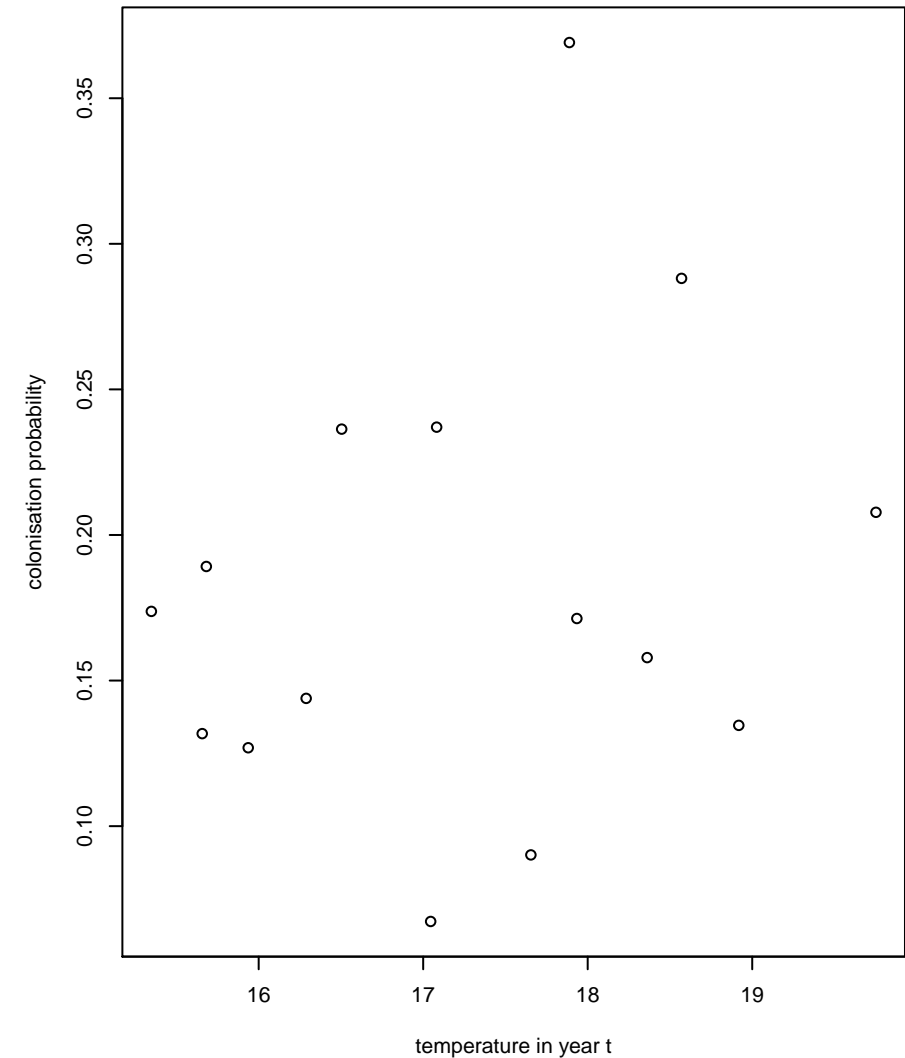

**Ochlodes sylvanus**

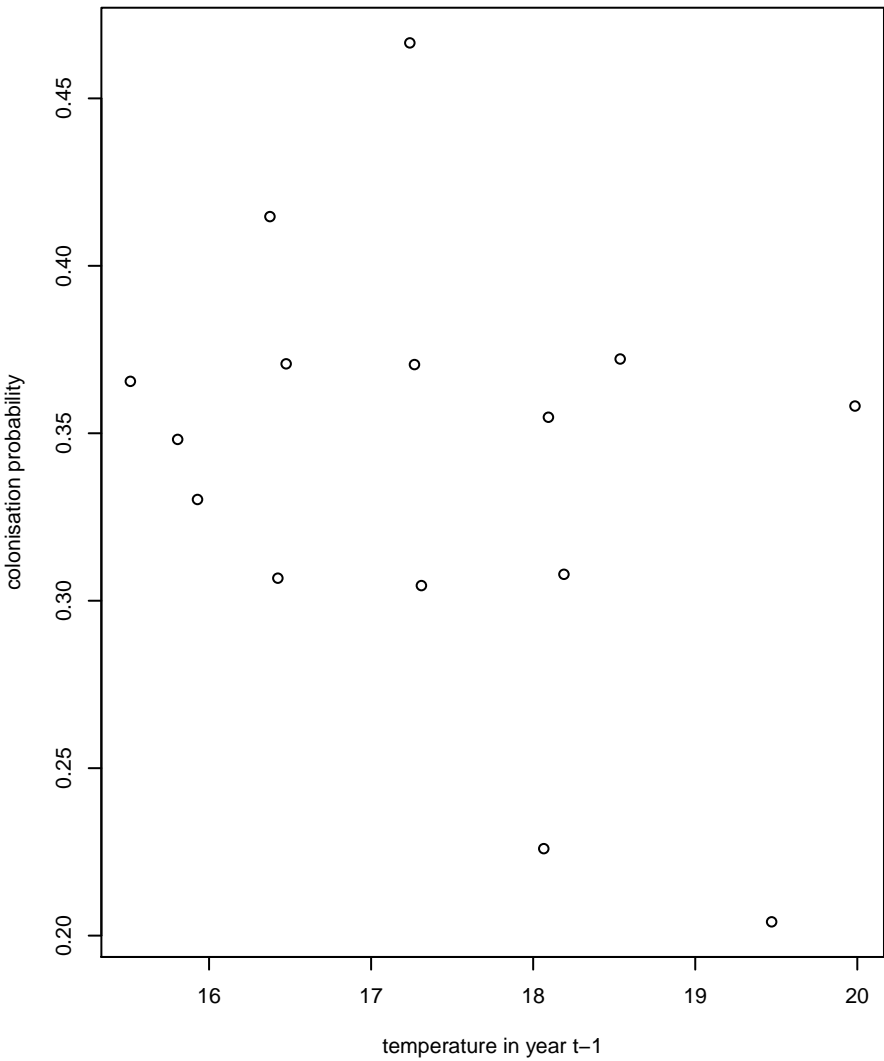

**Ochlodes sylvanus**

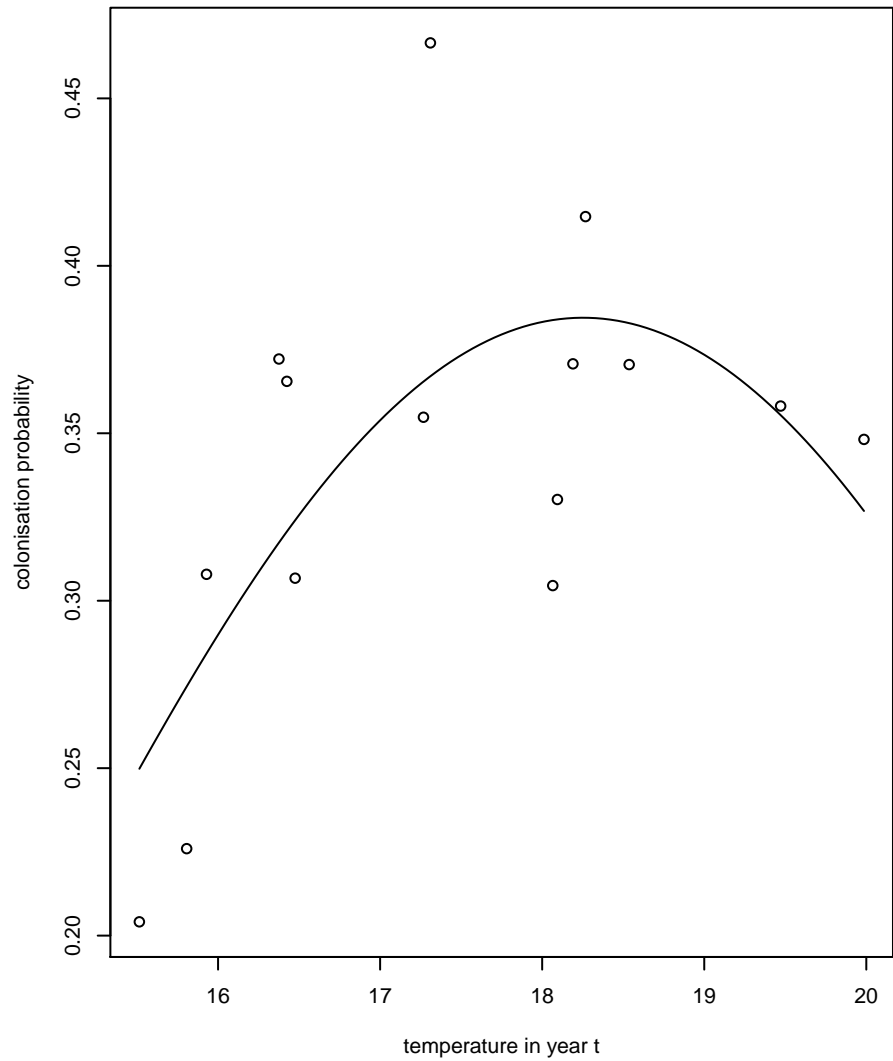

**Aglais urticae**

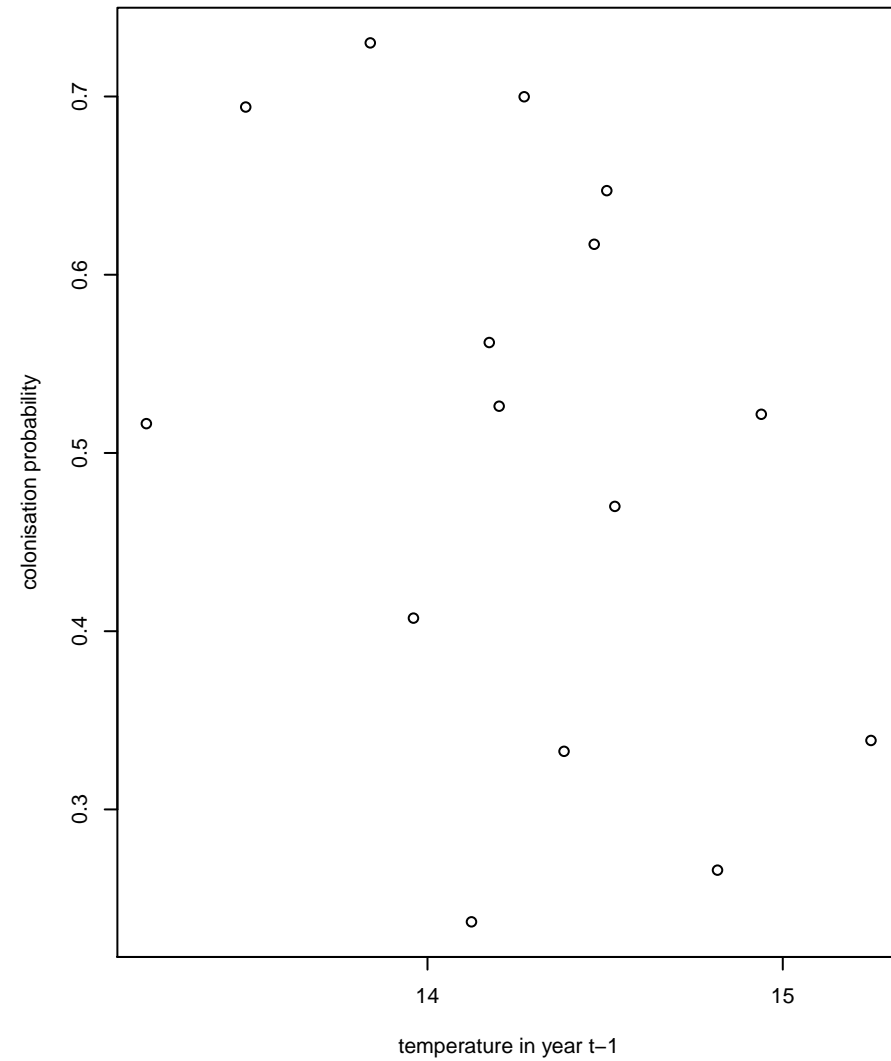

**Aglais urticae**

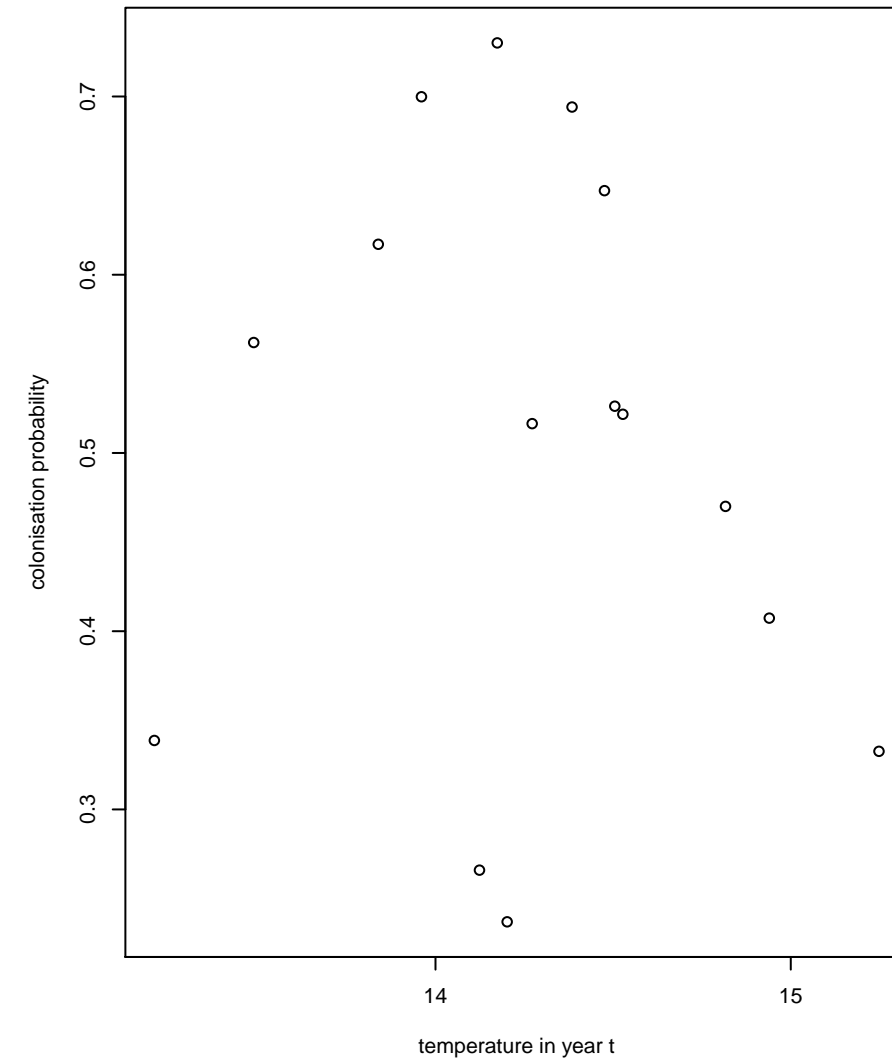

**Aglais io**

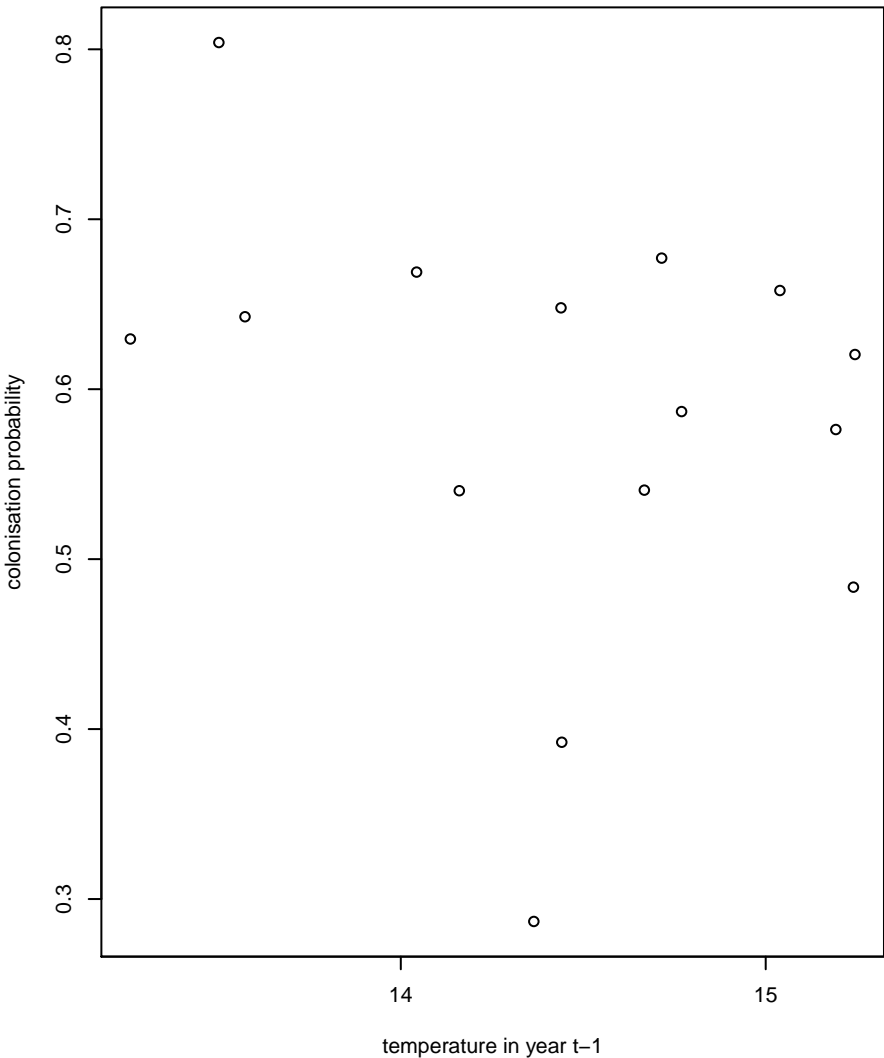

**Aglais io**

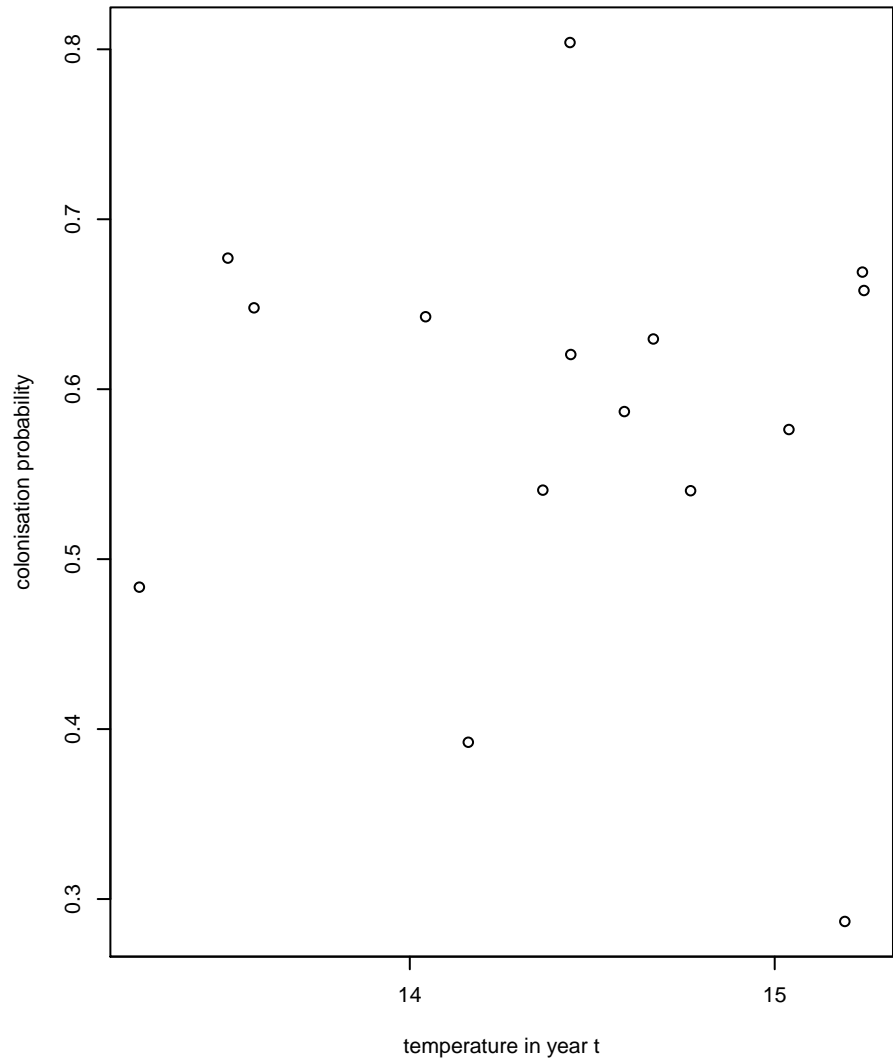

**Polygonia c-album**

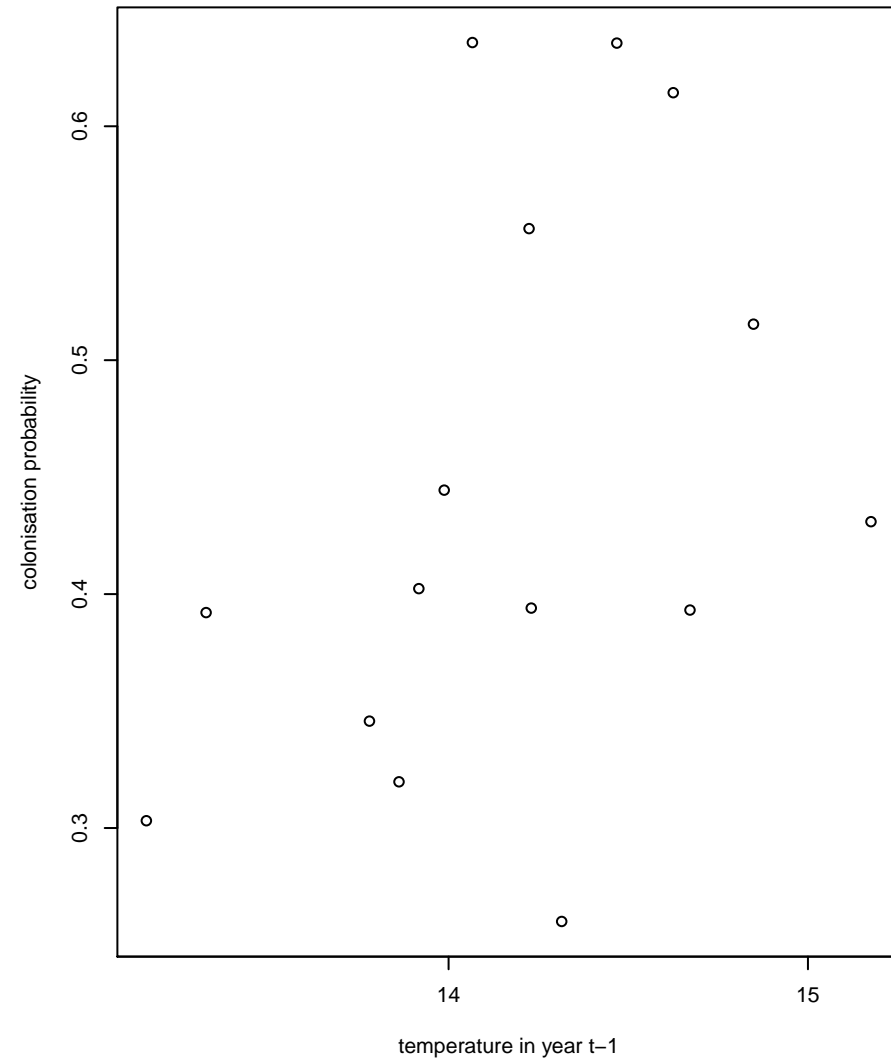

**Polygonia c-album**

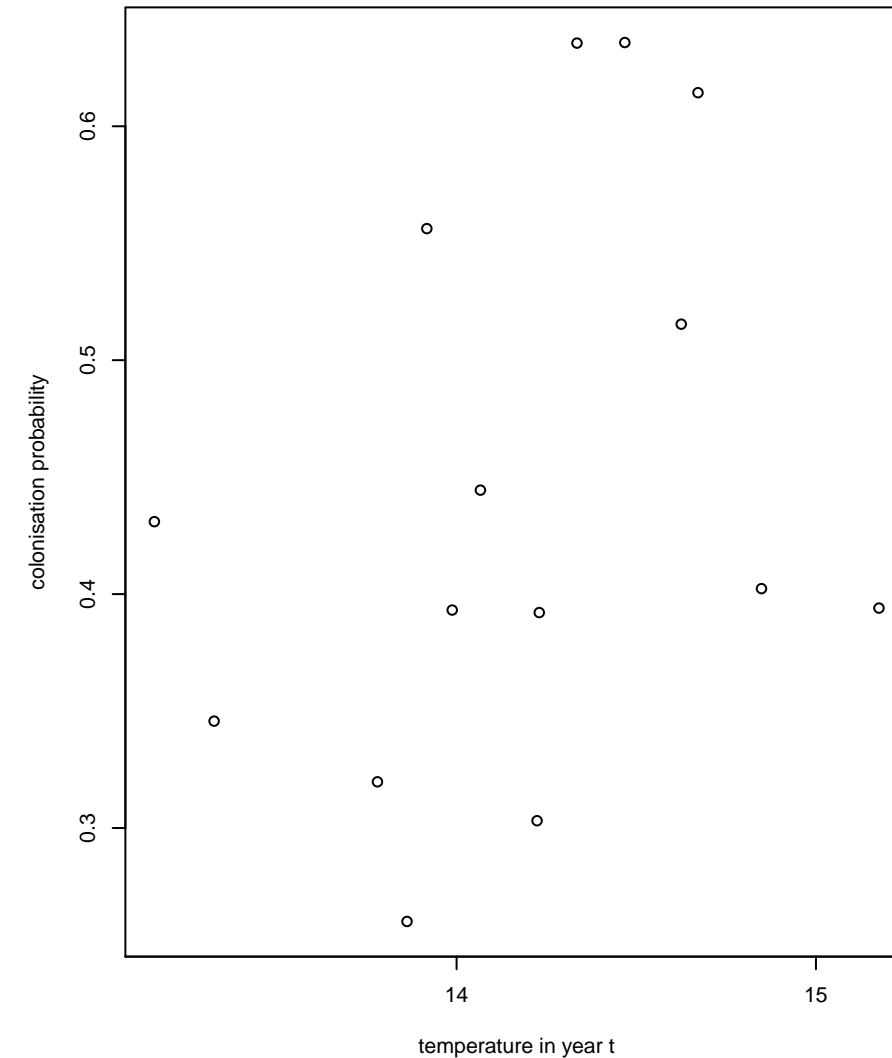

**Araschnia levana**

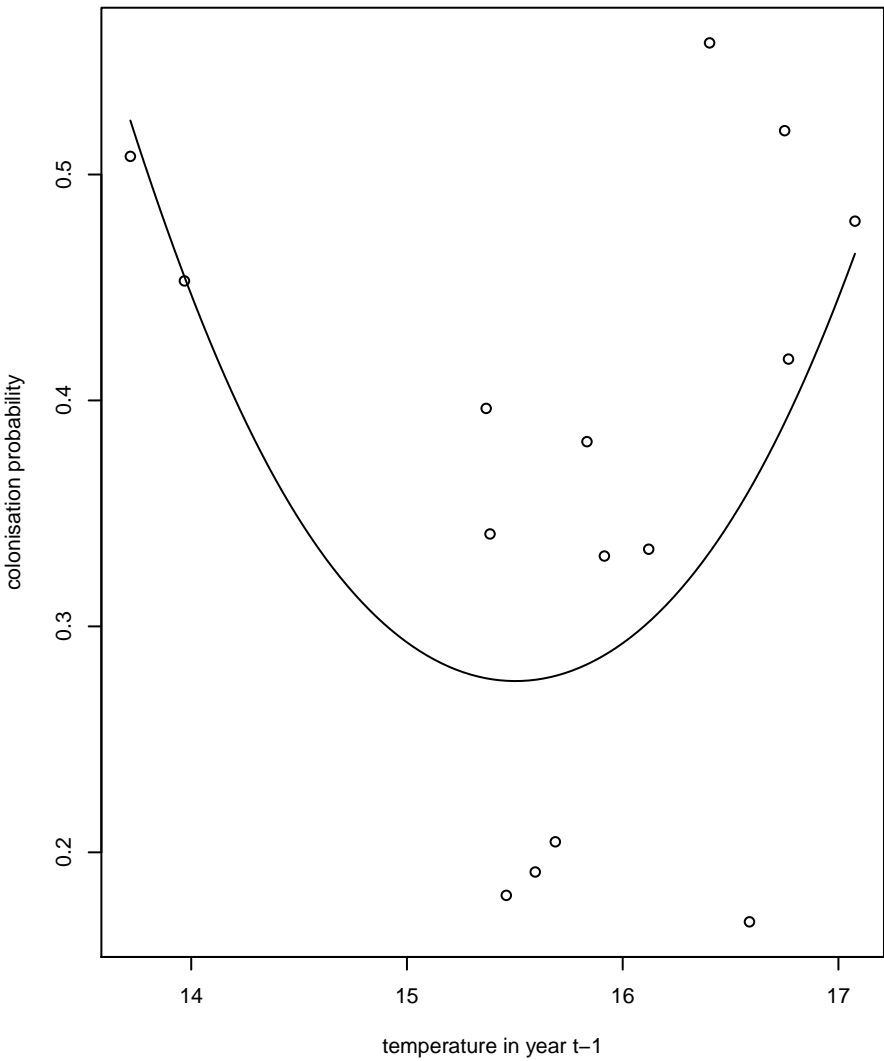

**Araschnia levana**

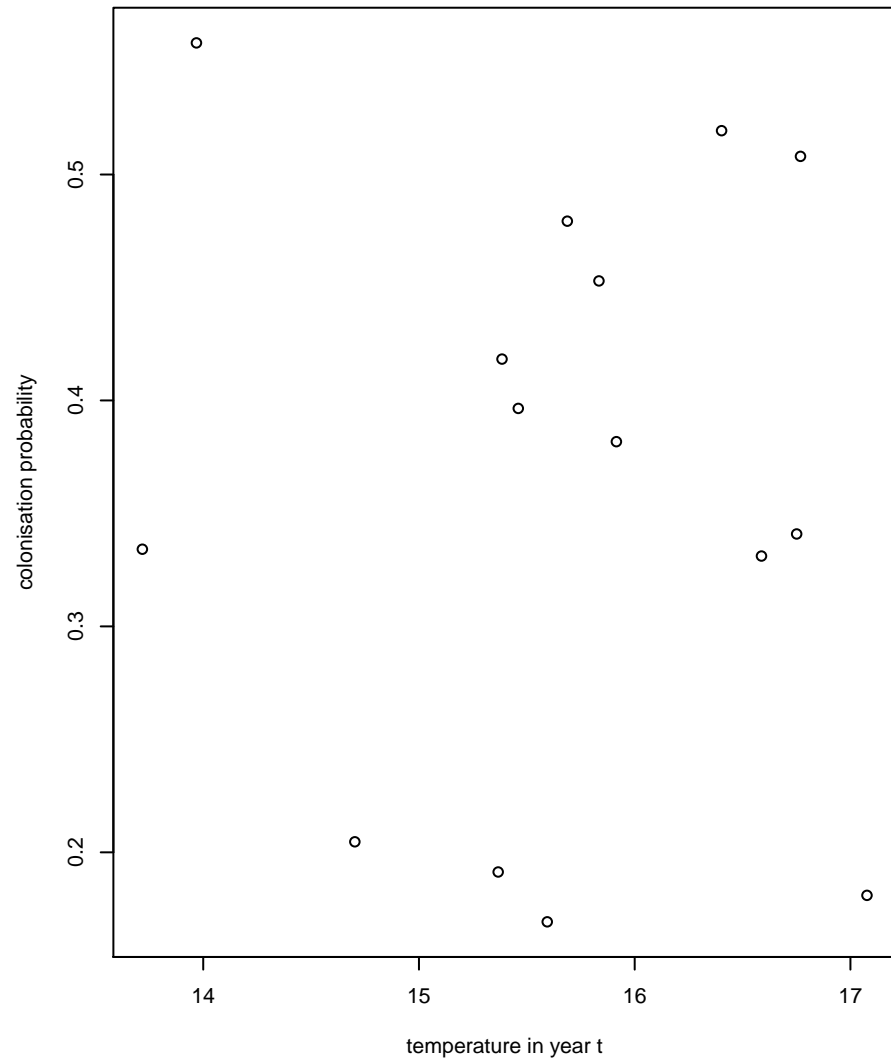

**Boloria selene**

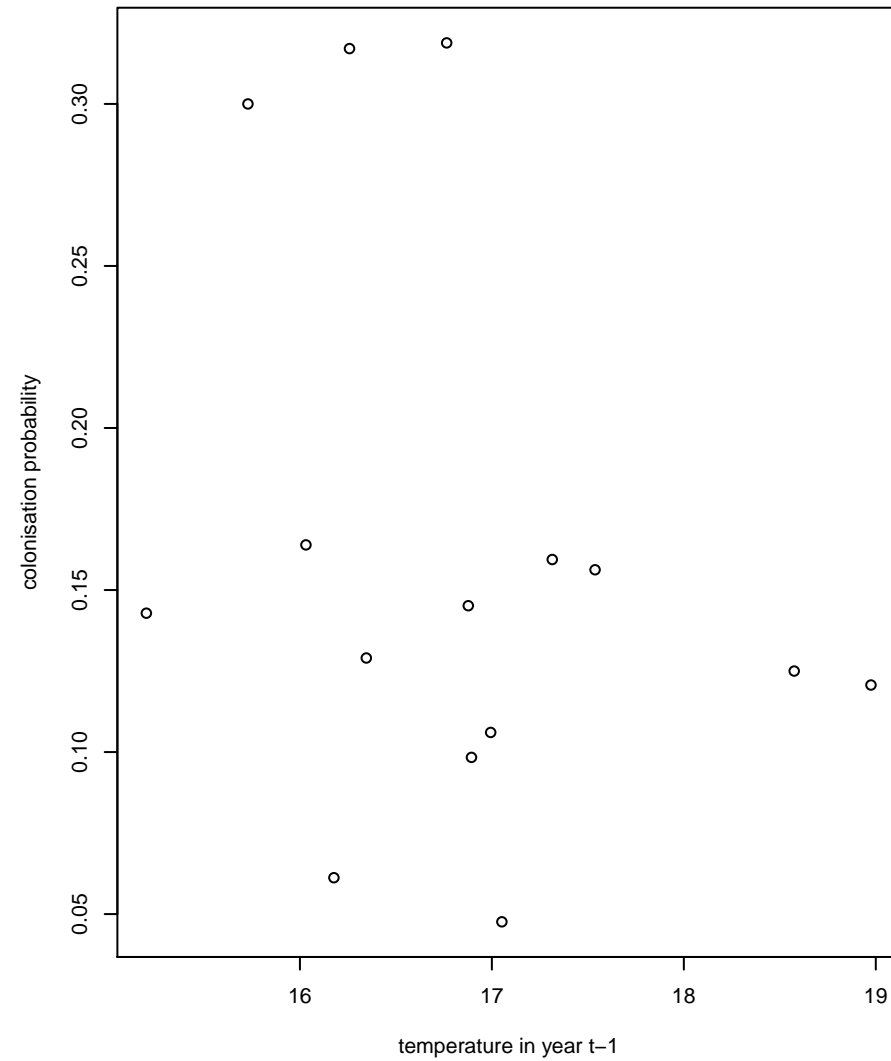

**Boloria selene**

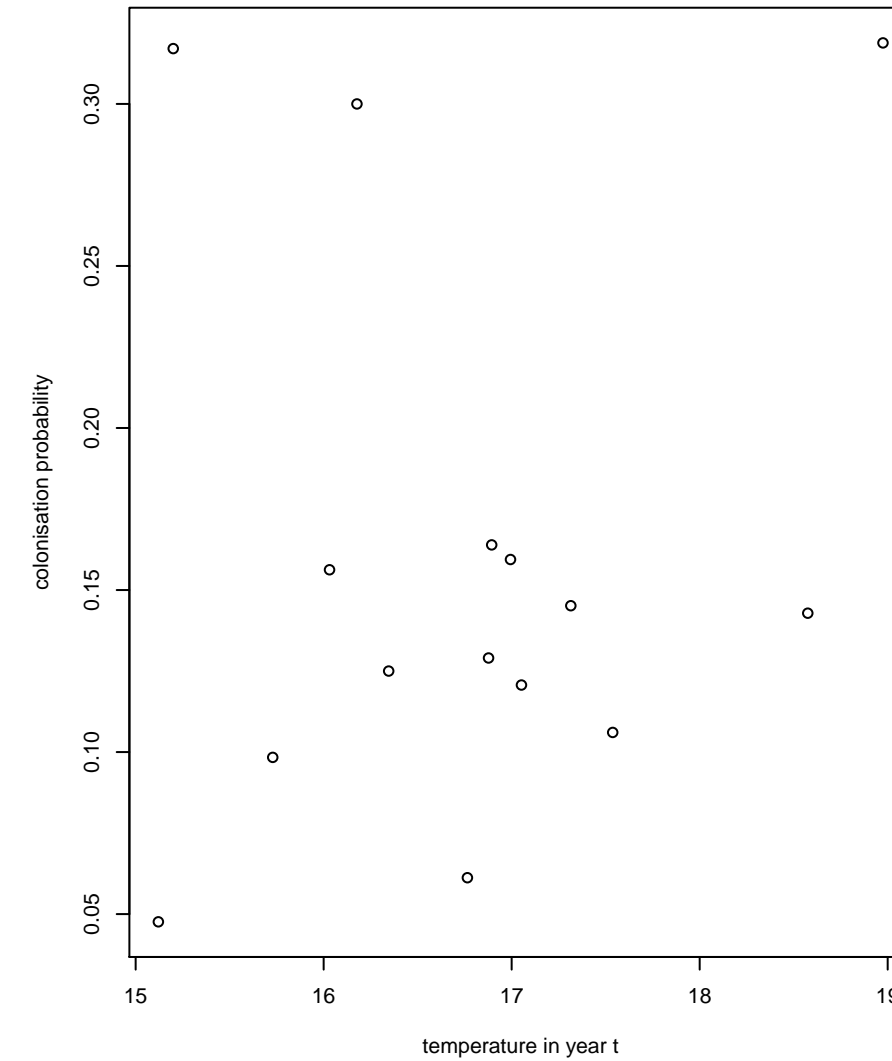

**Issoria lathonia**

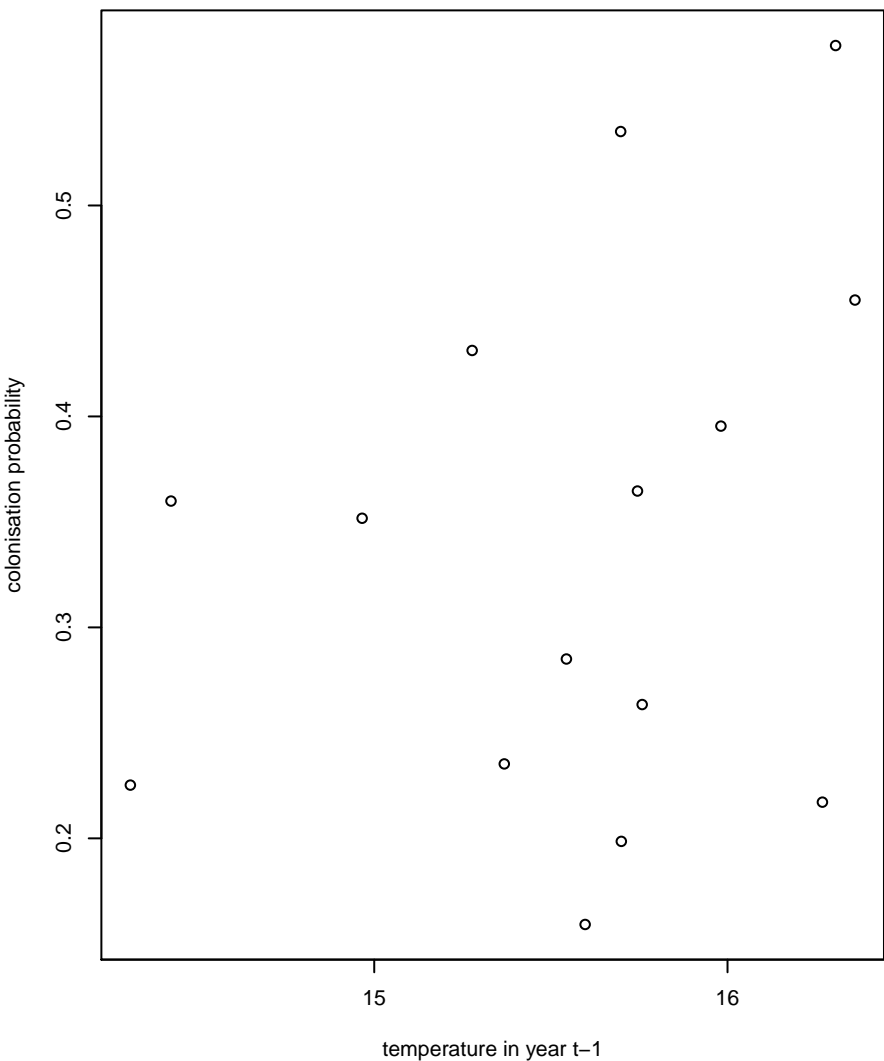

**Issoria lathonia**

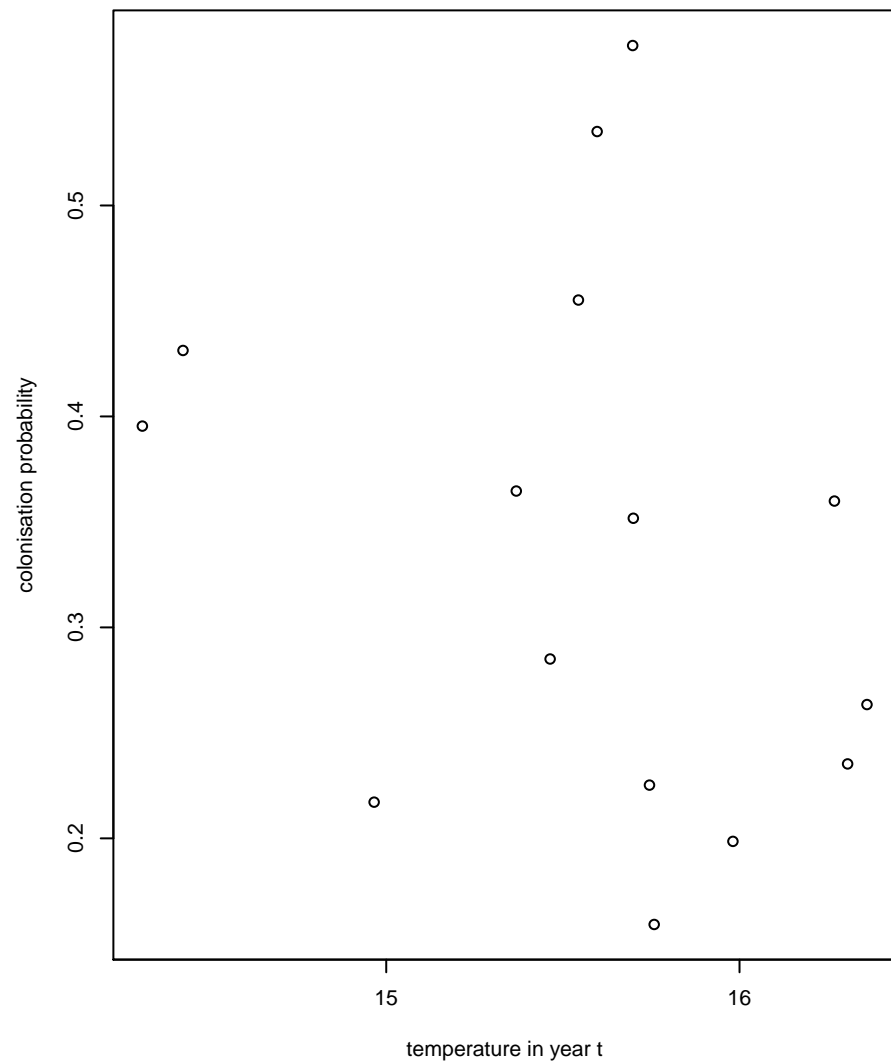

**Argynnis niobe**

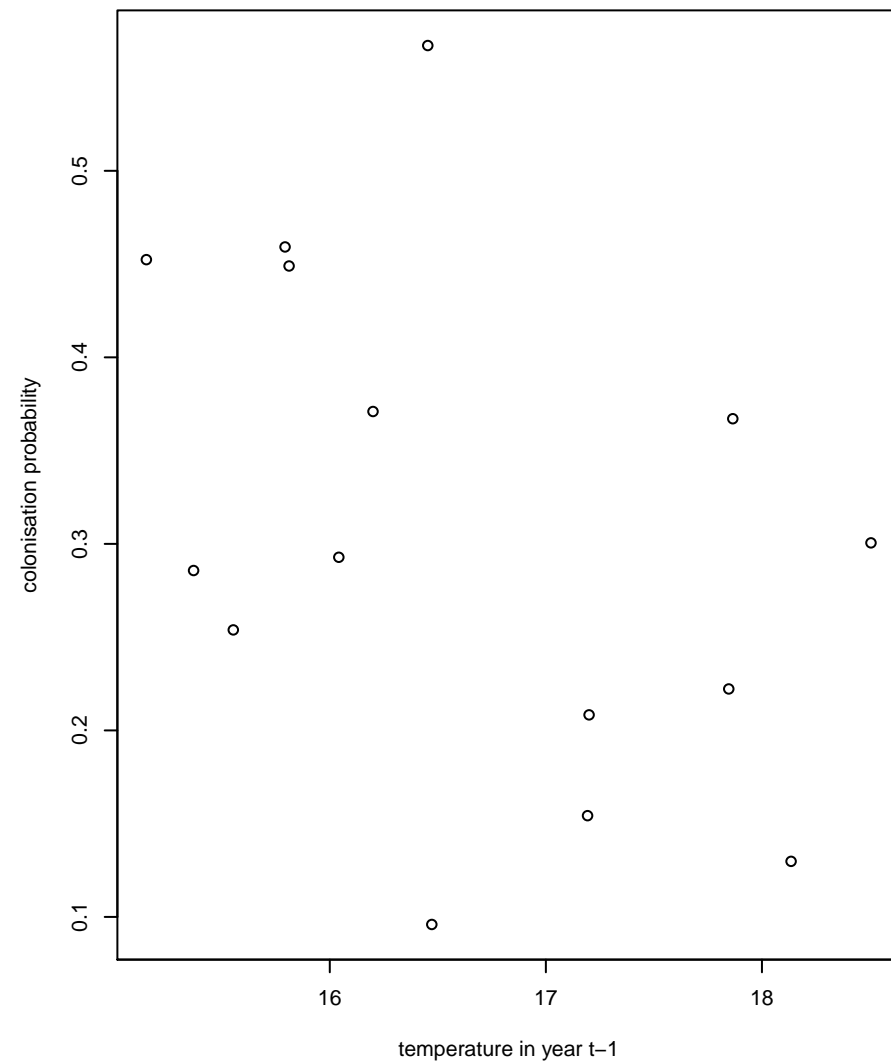

**Argynnis niobe**

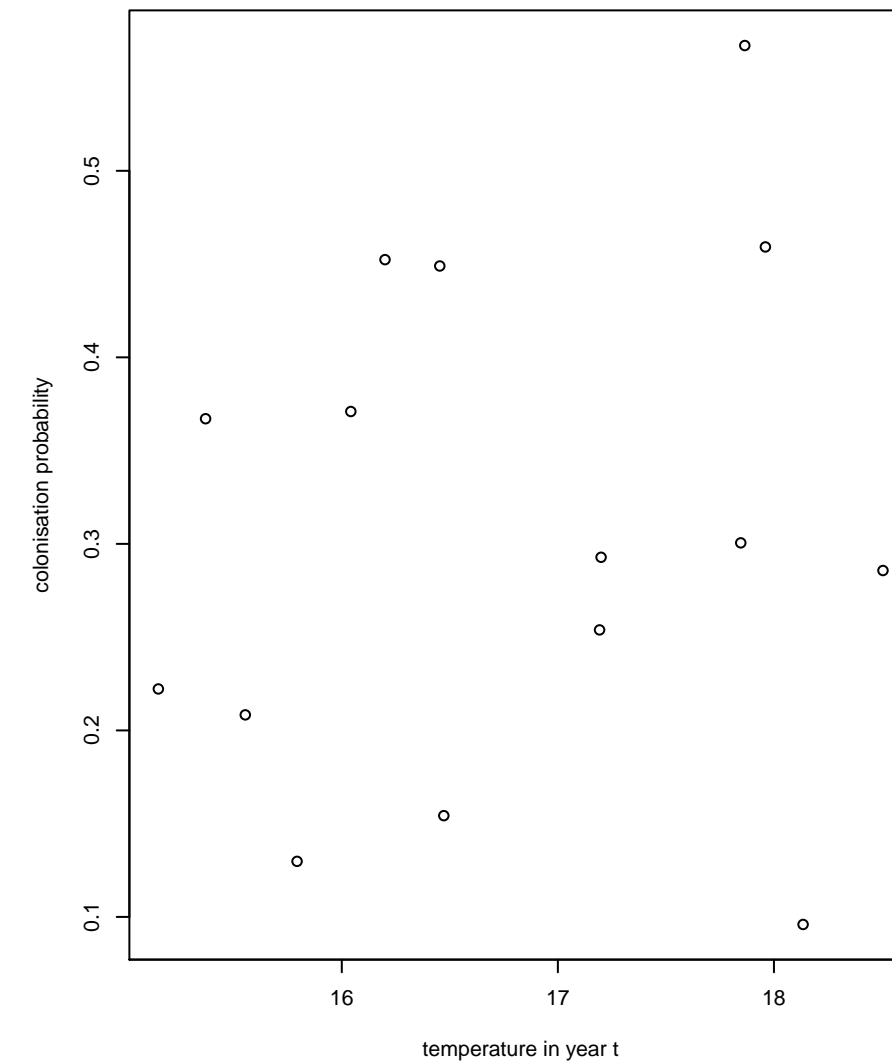



**Argynnis aglaja**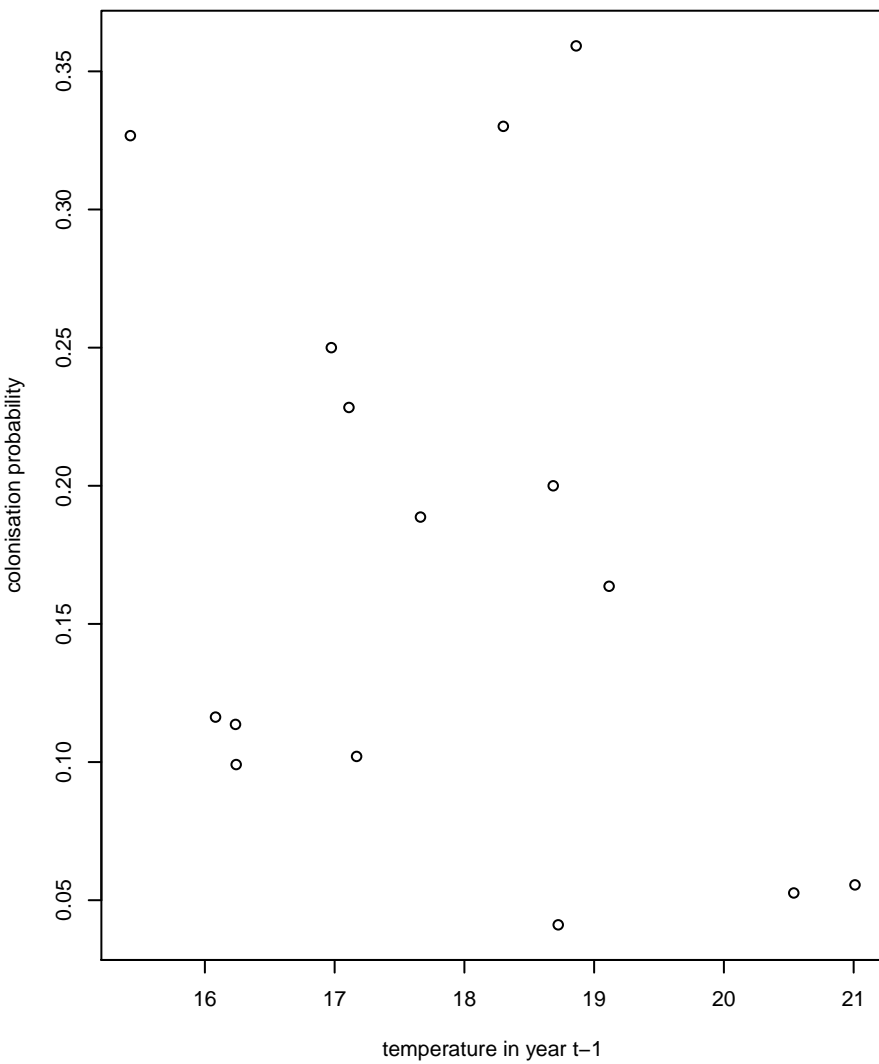**Argynnis aglaja**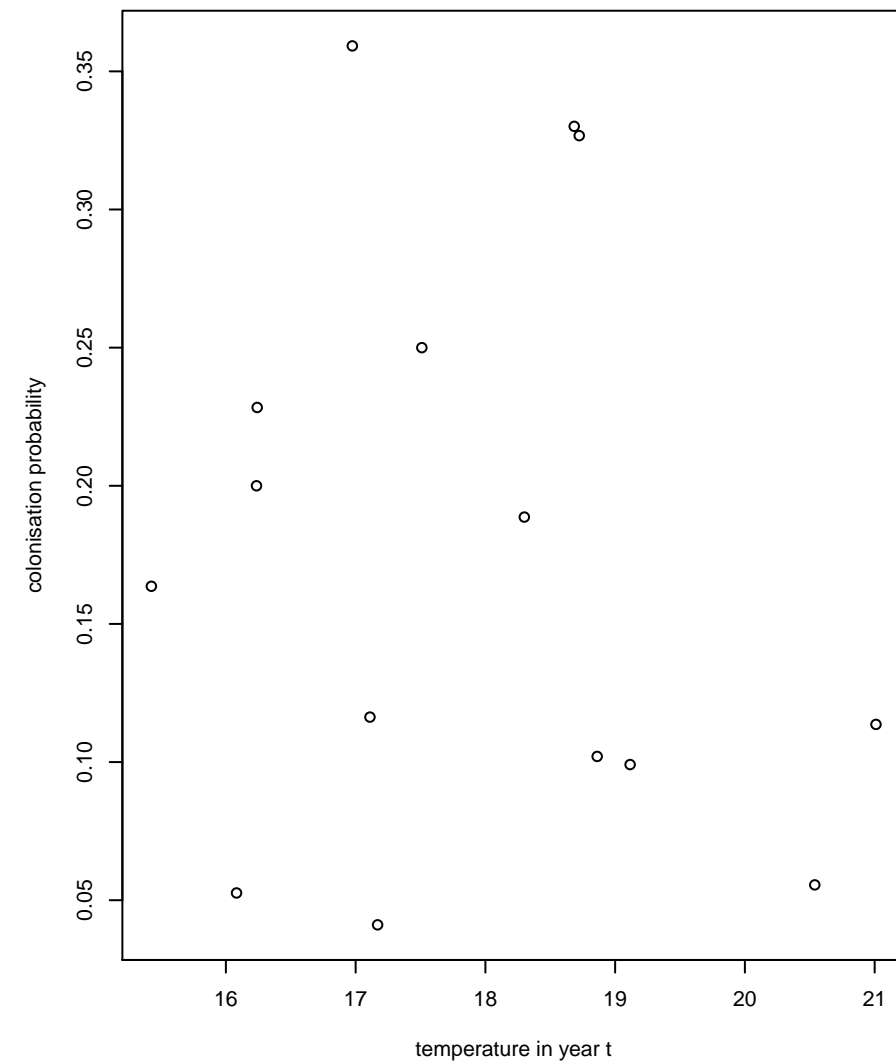**Pararge aegeria**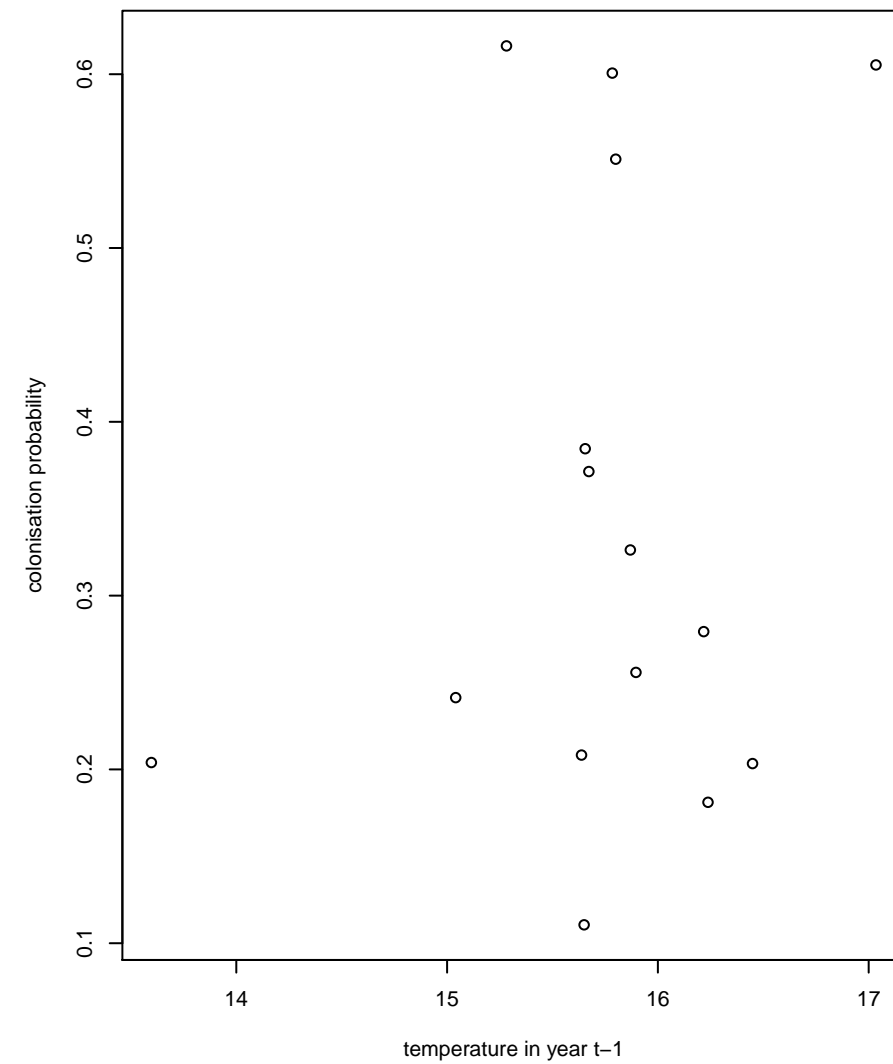**Pararge aegeria**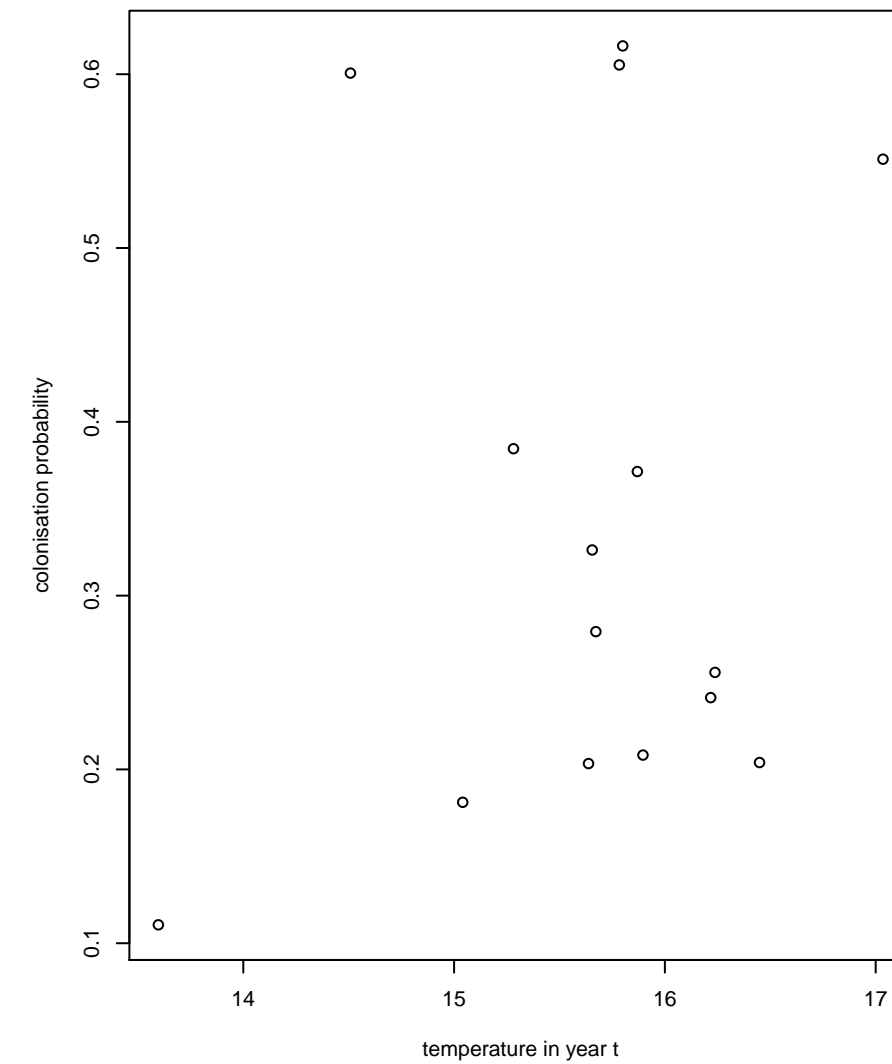**Lasiommata megera**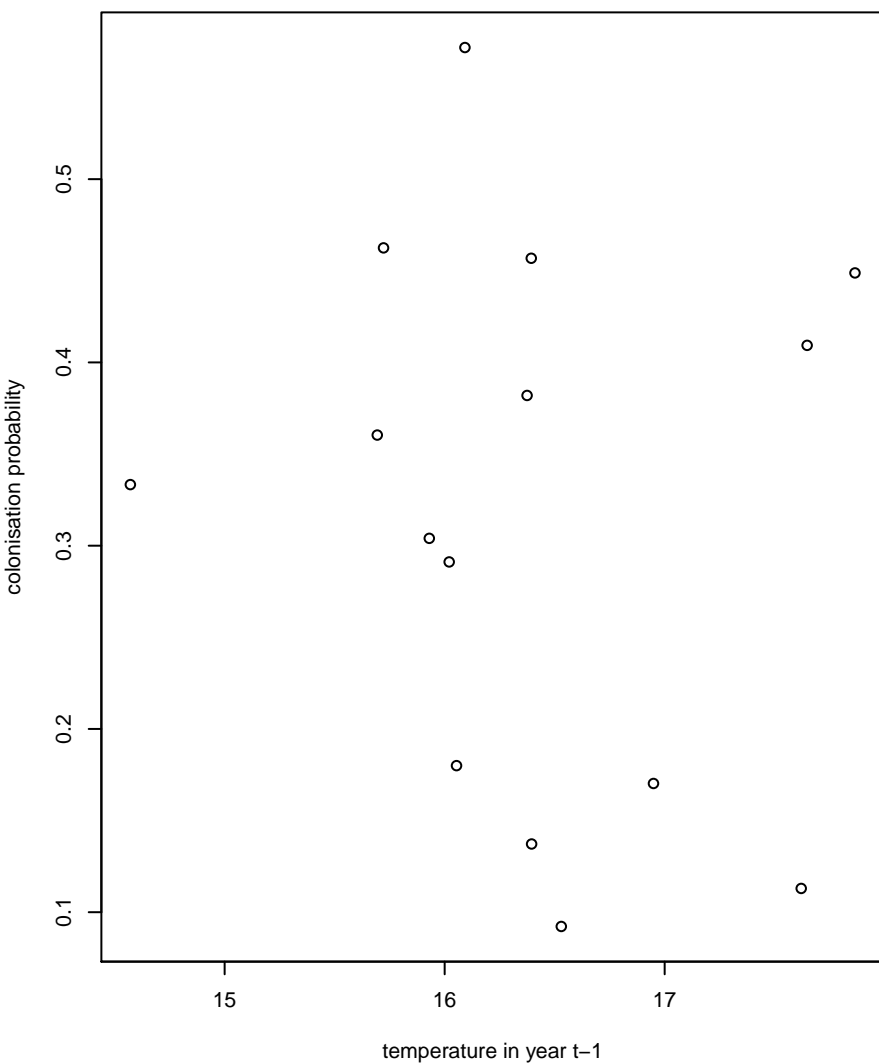**Lasiommata megera**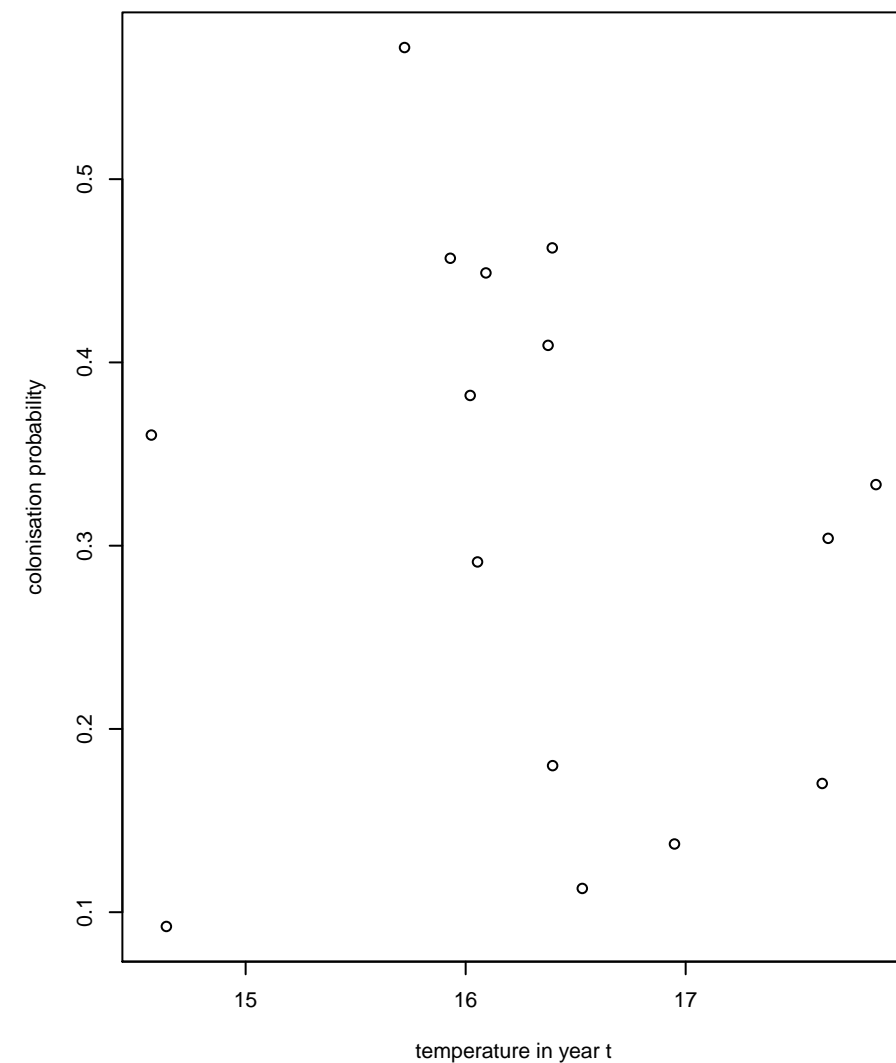**Aphantopus hyperantus**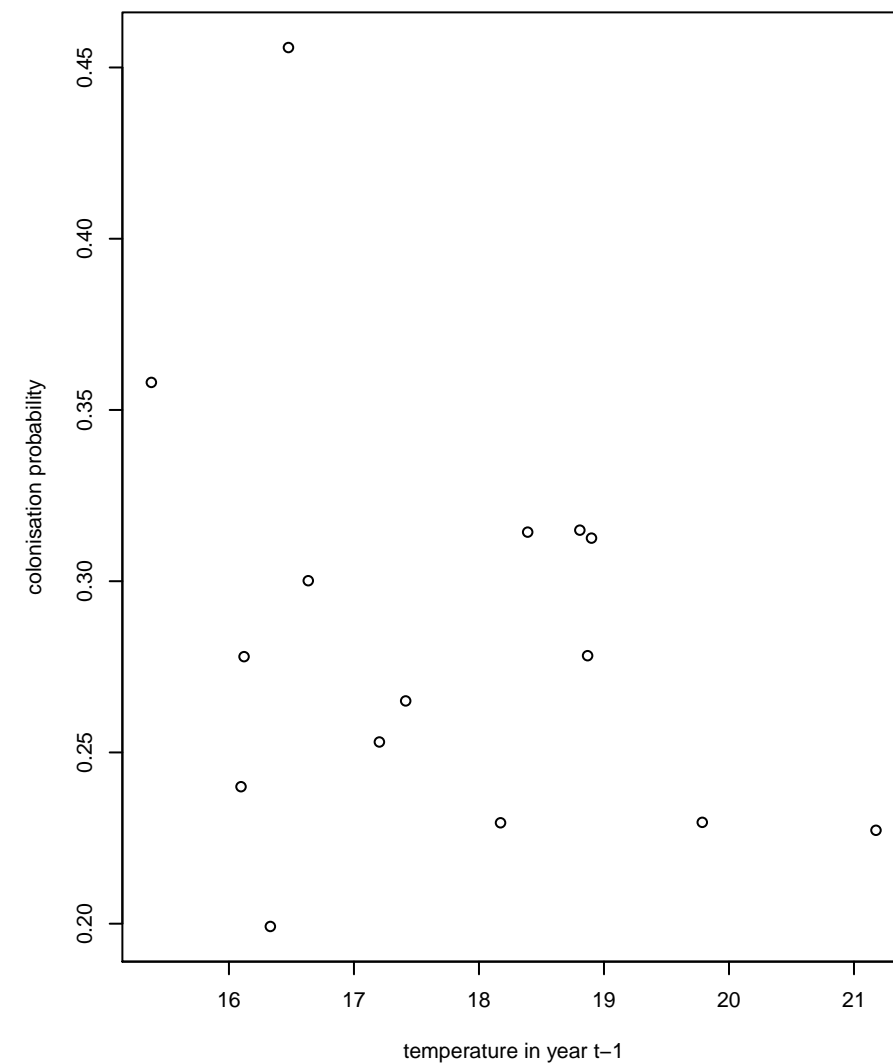**Aphantopus hyperantus**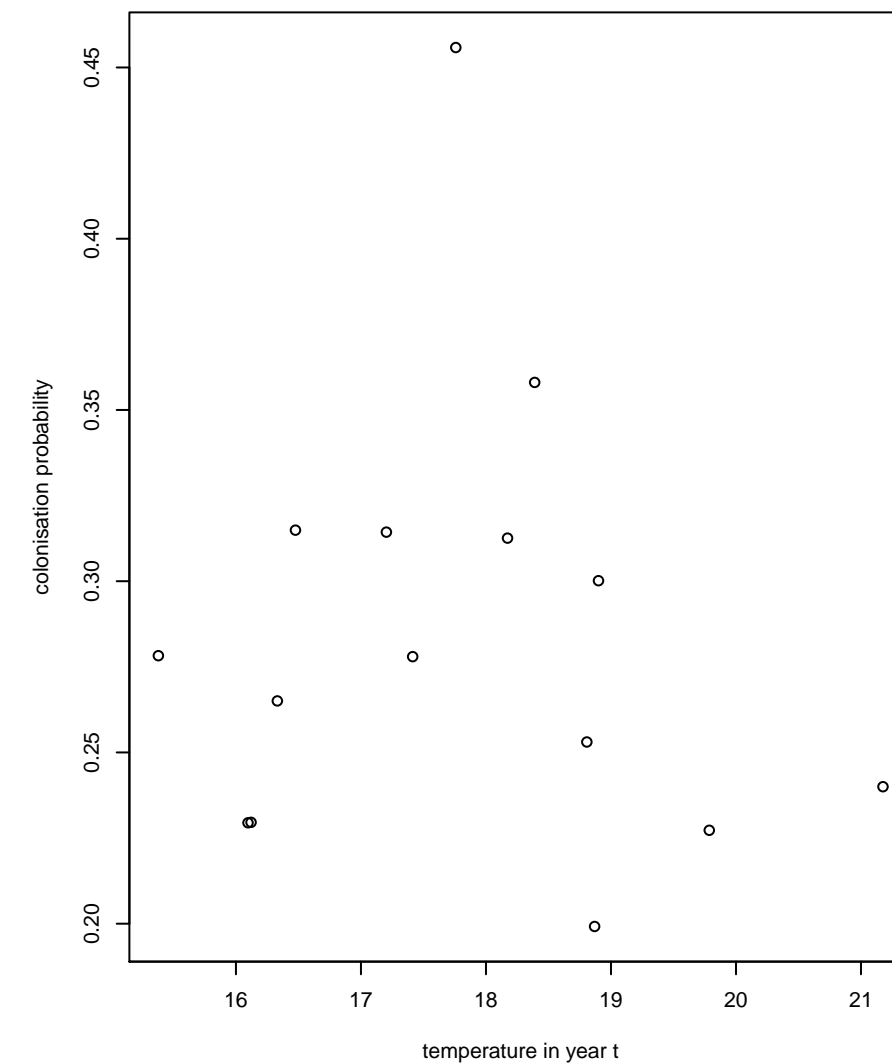

**Coenonympha pamphilus**

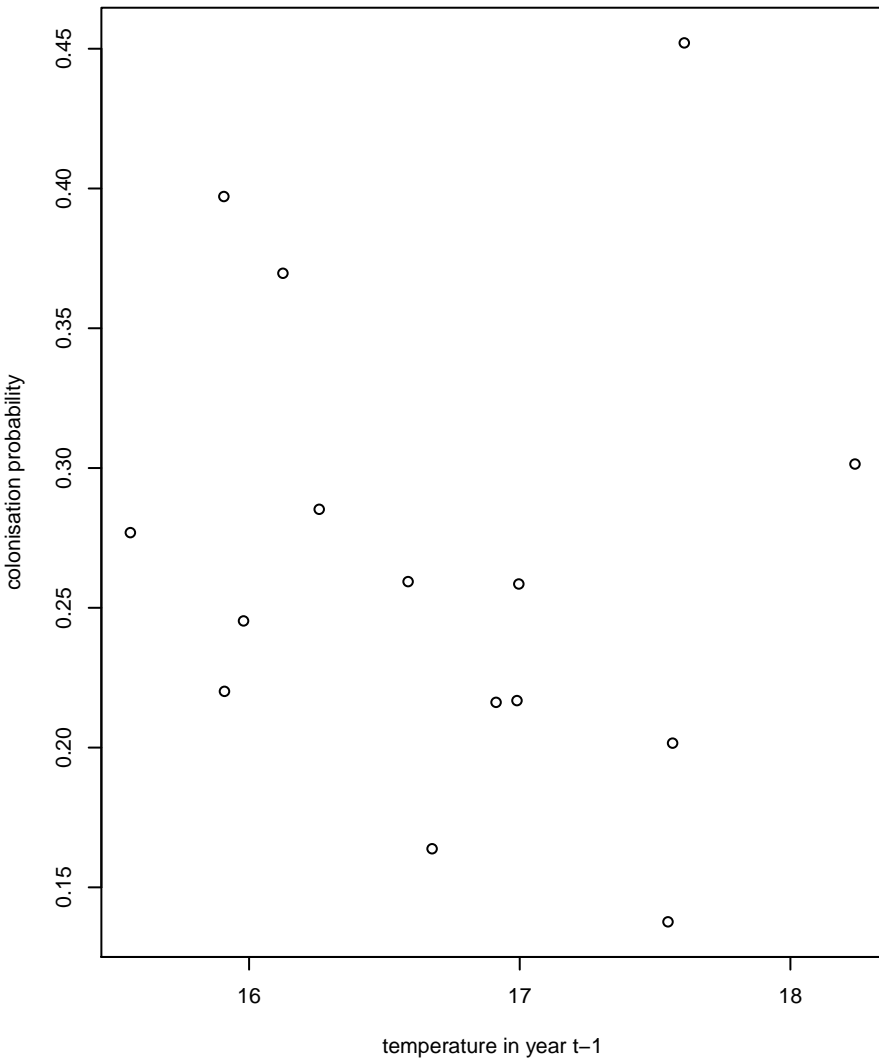

**Coenonympha pamphilus**

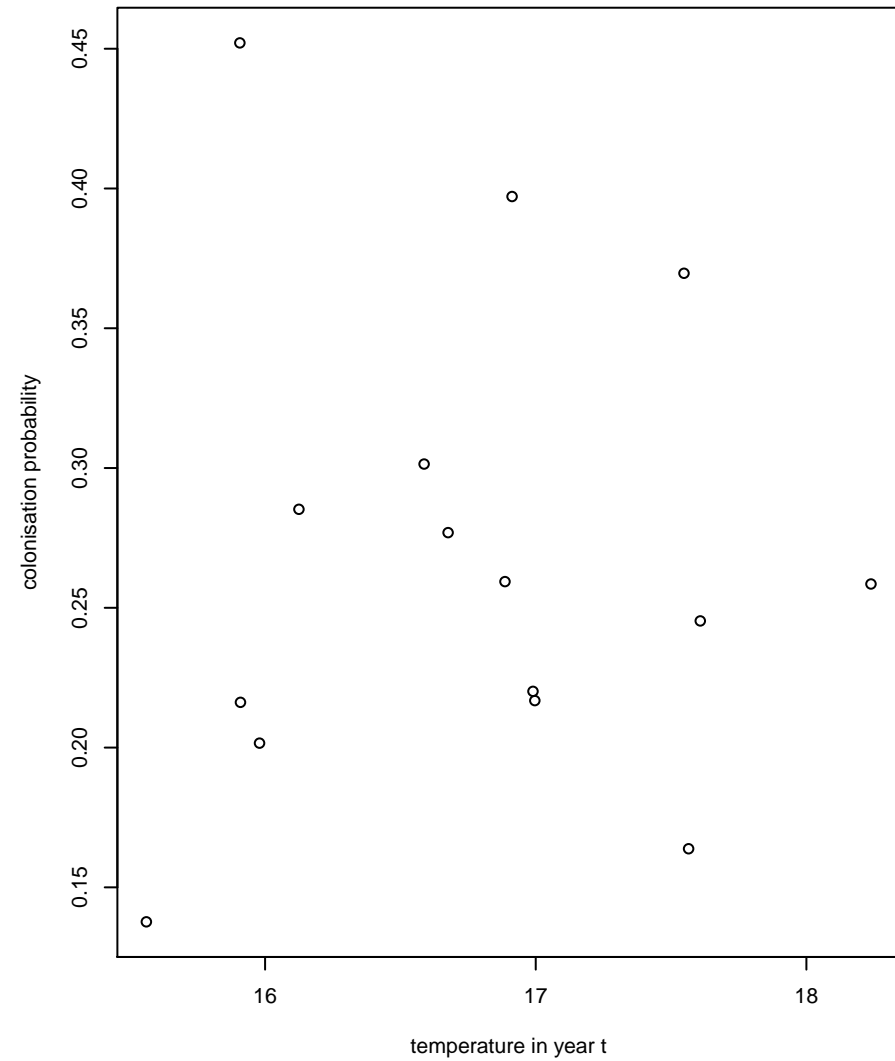

**Anguis fragilis**

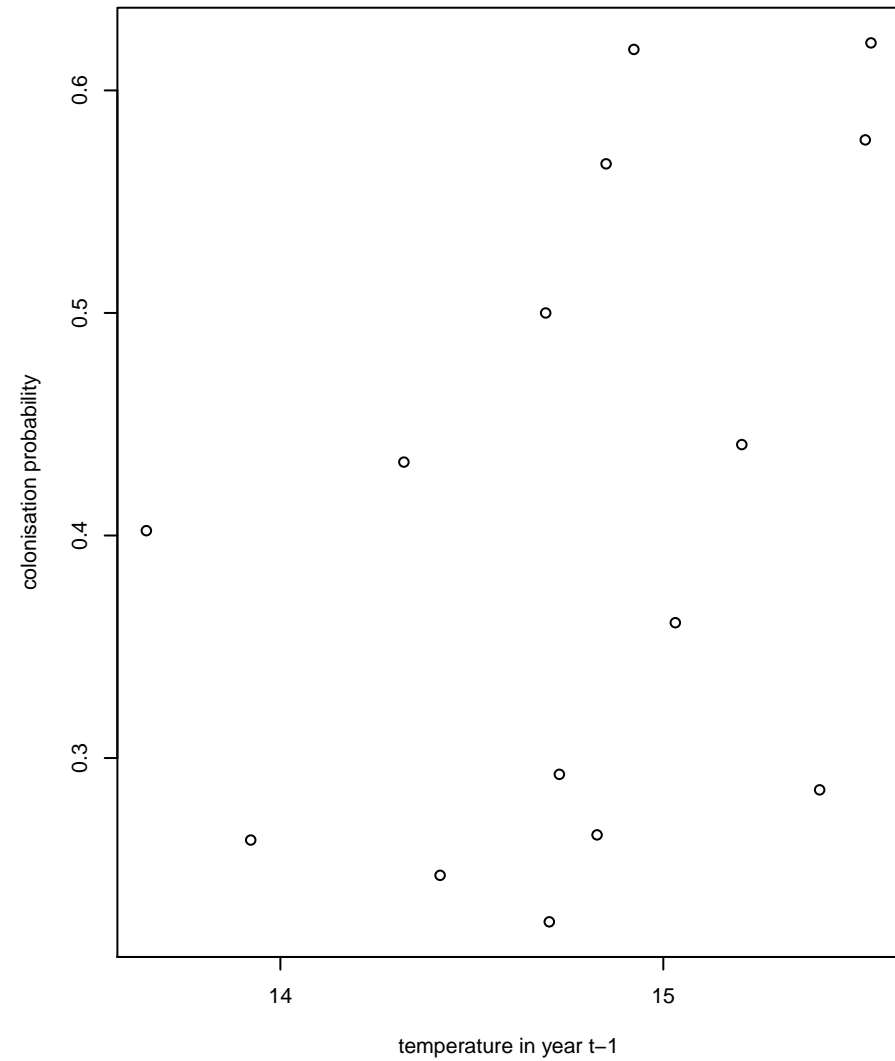

**Anguis fragilis**

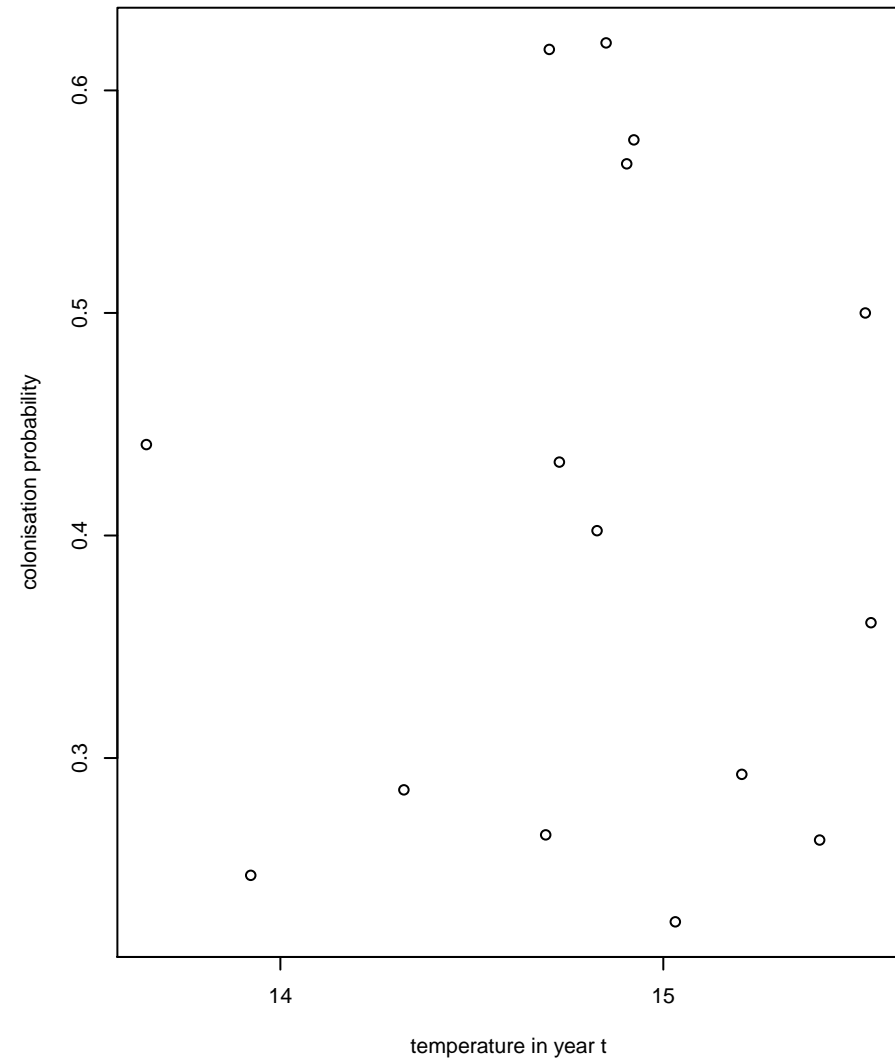

**Lacerta agilis**

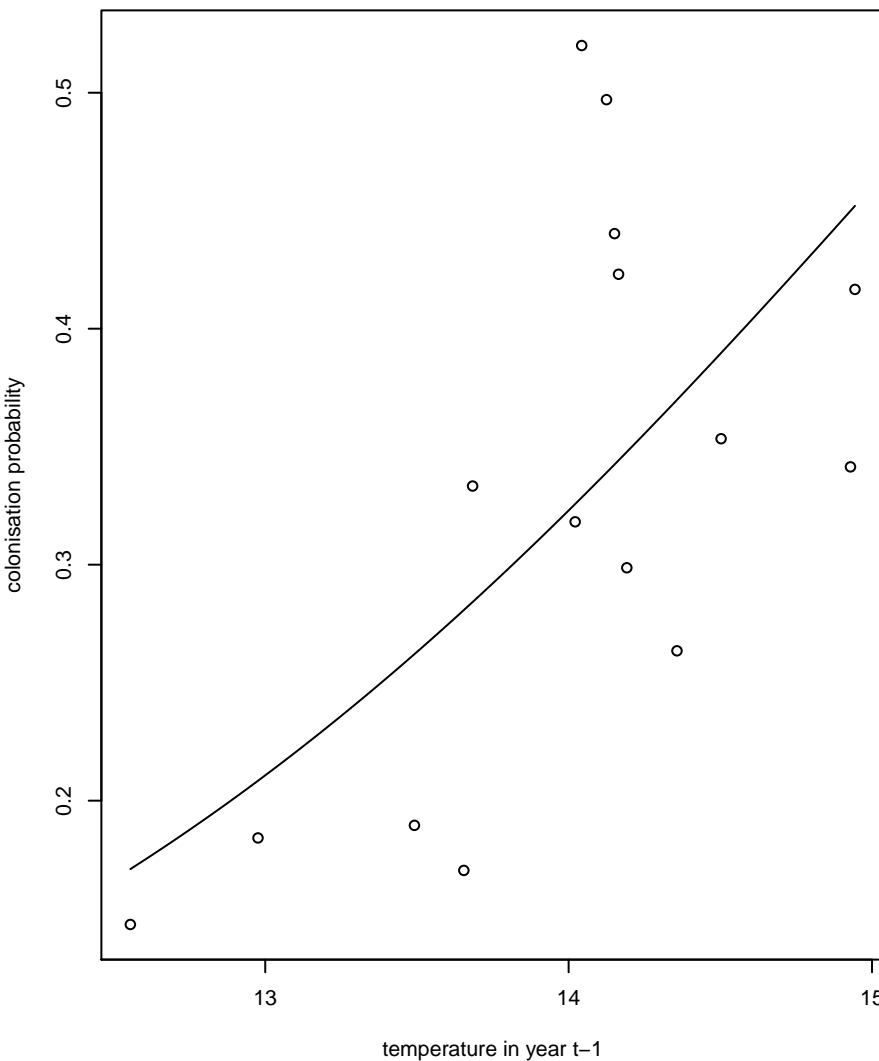

**Lacerta agilis**

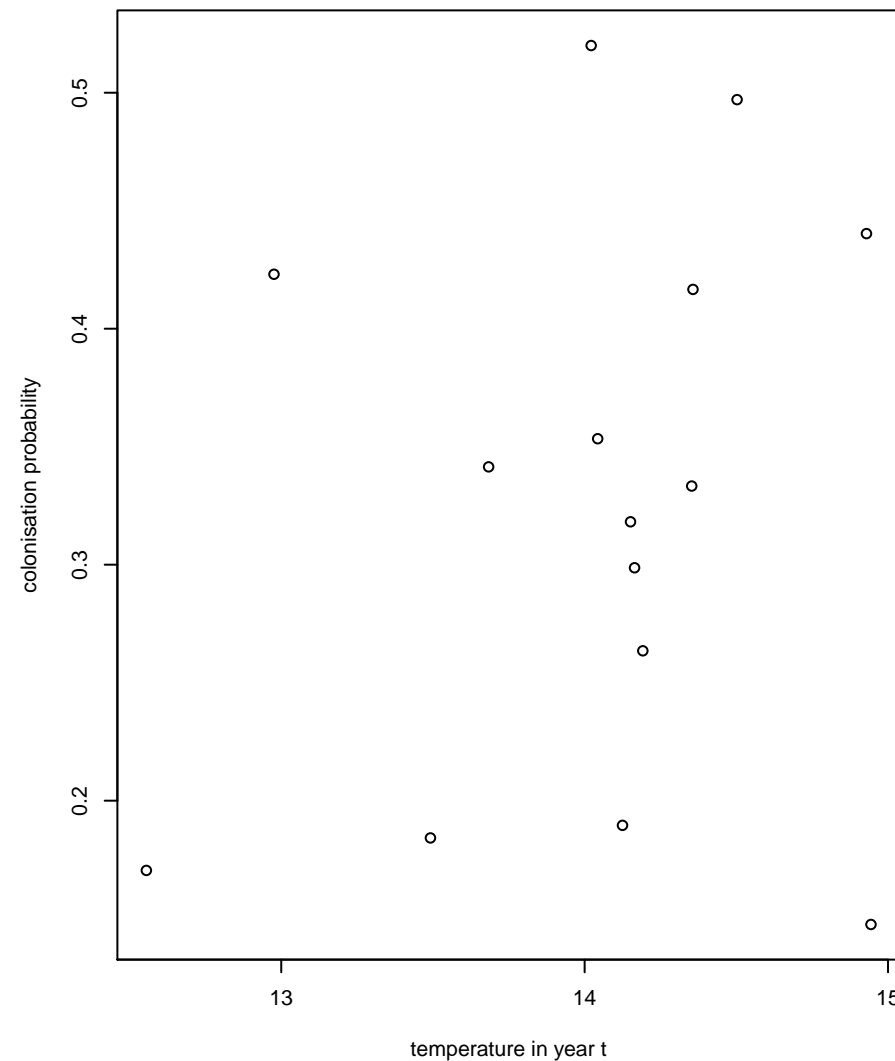

**zootocavivipara**

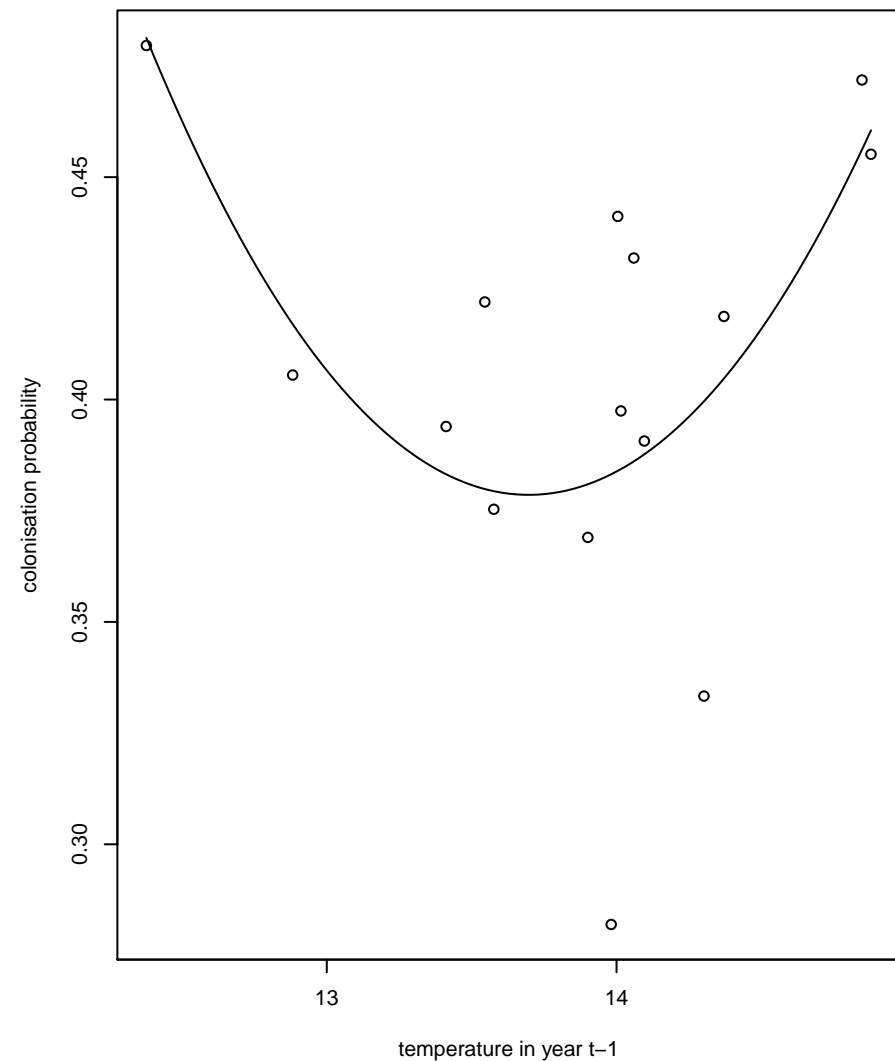

**zootocavivipara**

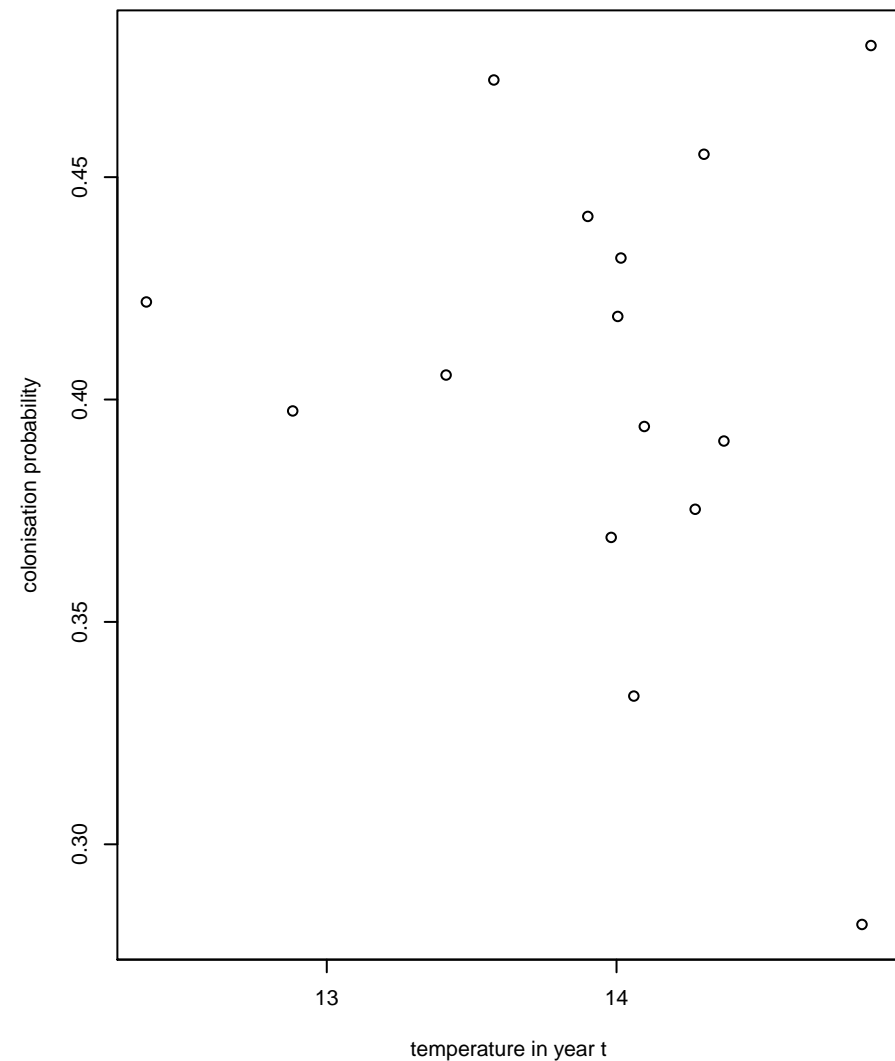

**Podarcis muralis**

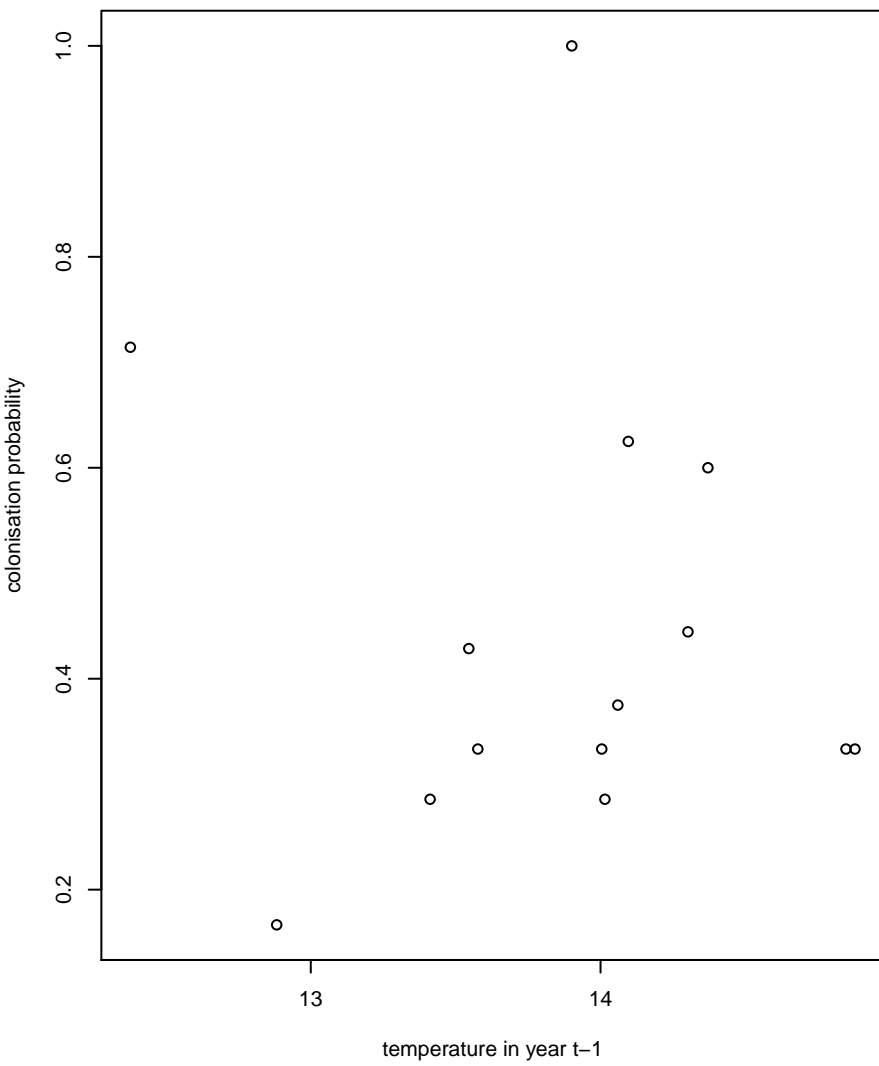

**Podarcis muralis**

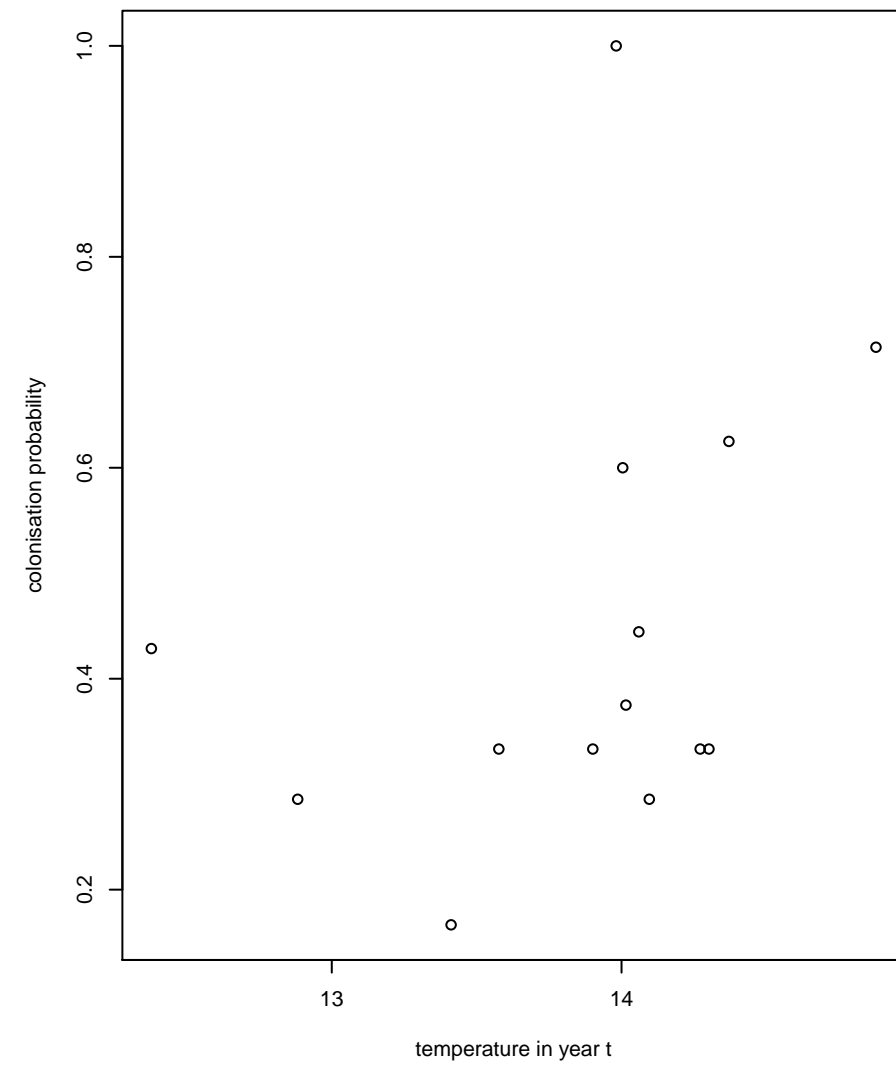

**Coronella austriaca**

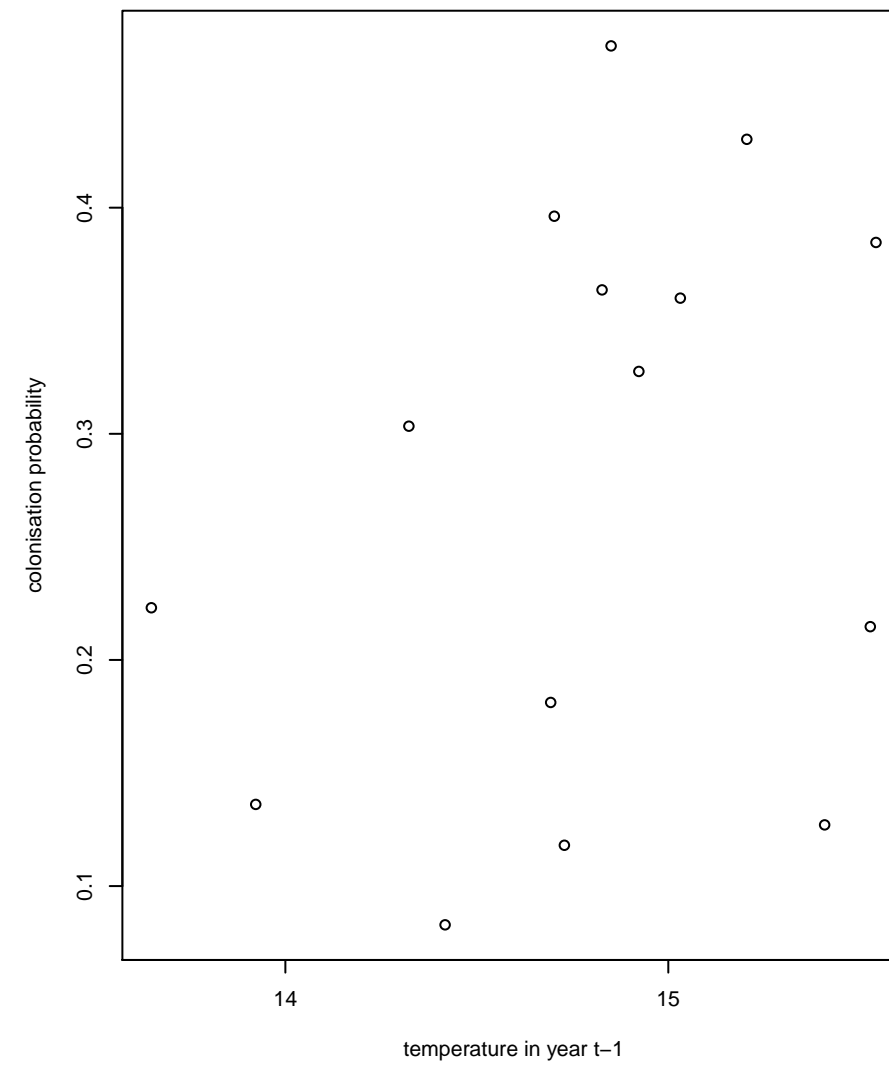

**Coronella austriaca**

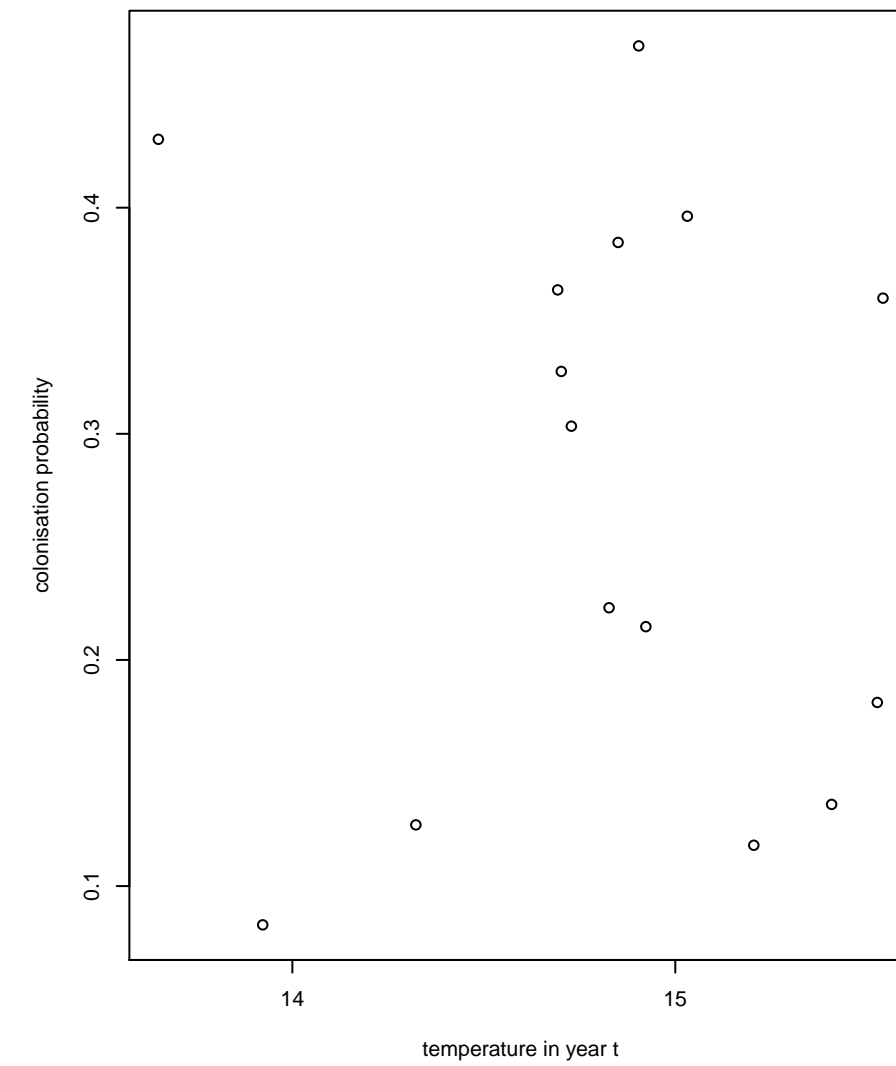

**Natrix natrix**

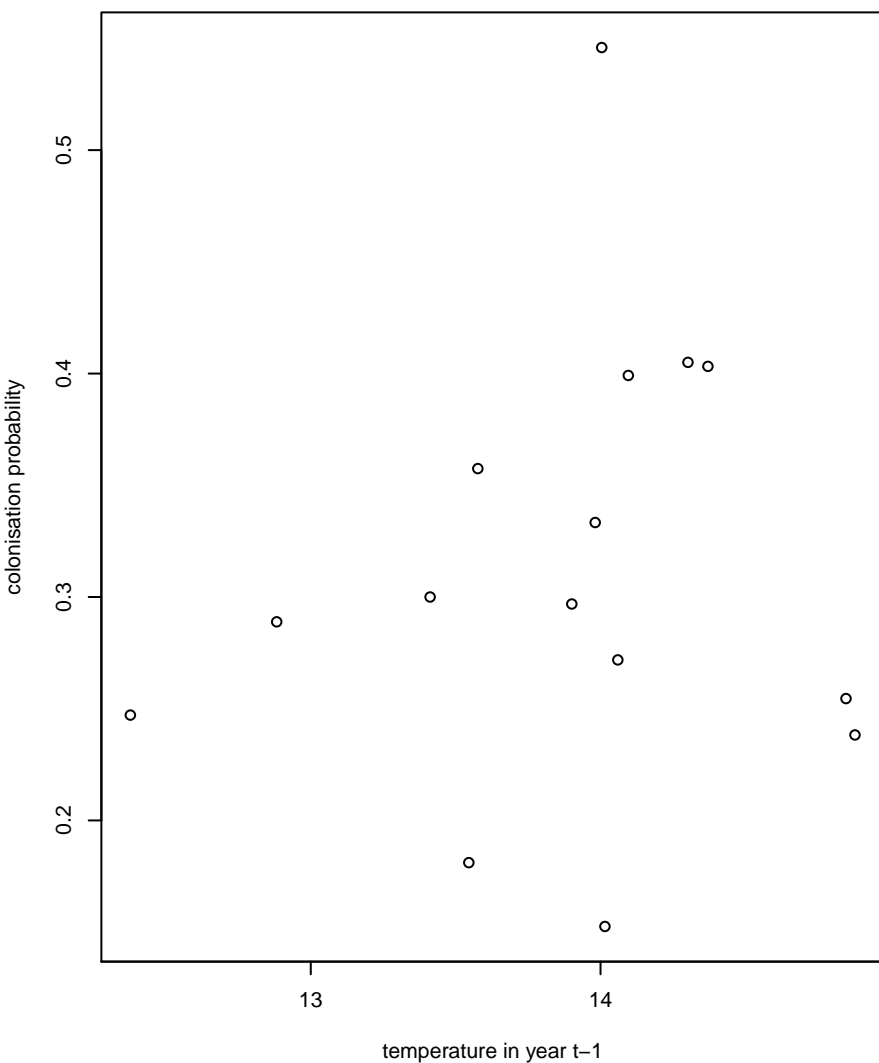

**Natrix natrix**

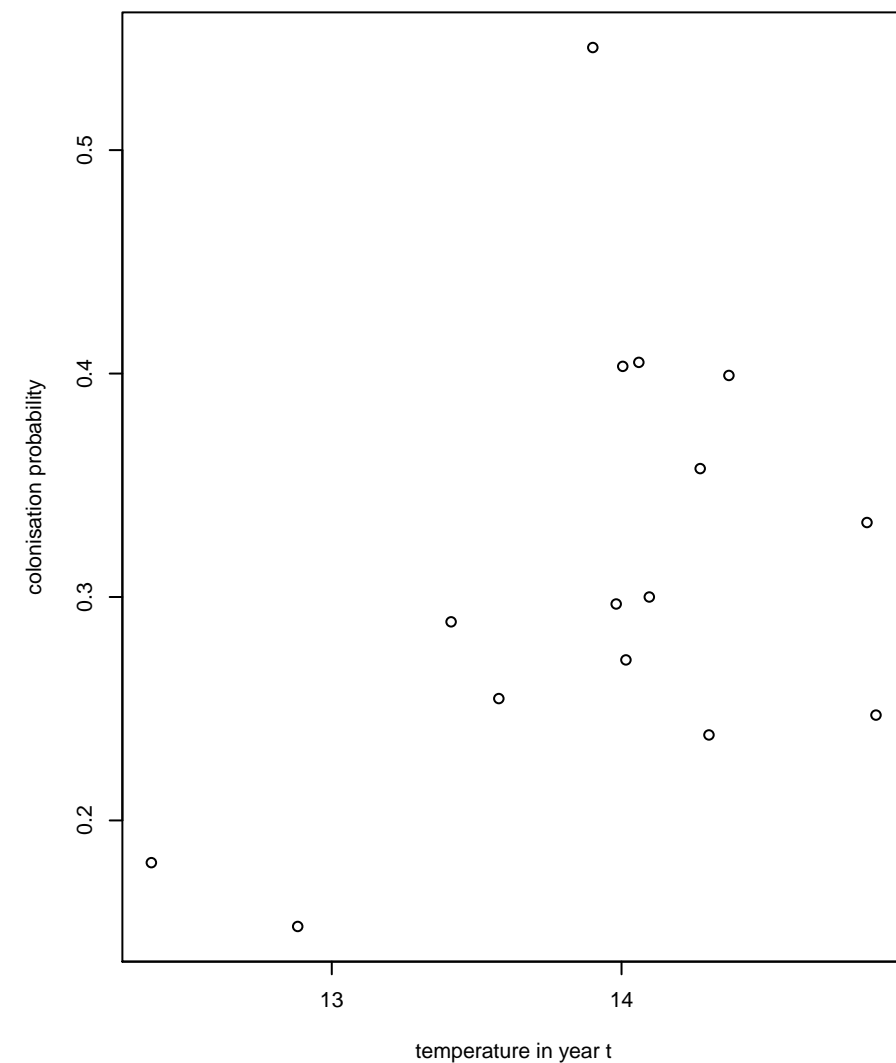

**Vipera berus**

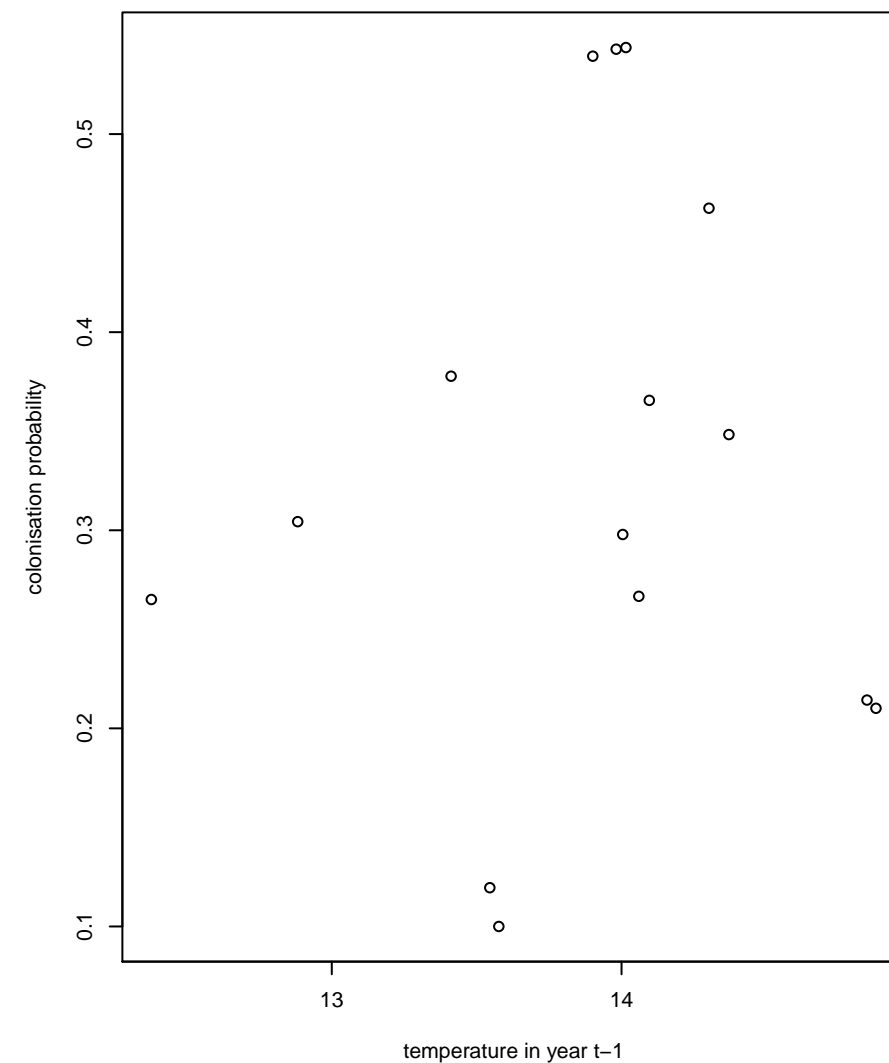

**Vipera berus**

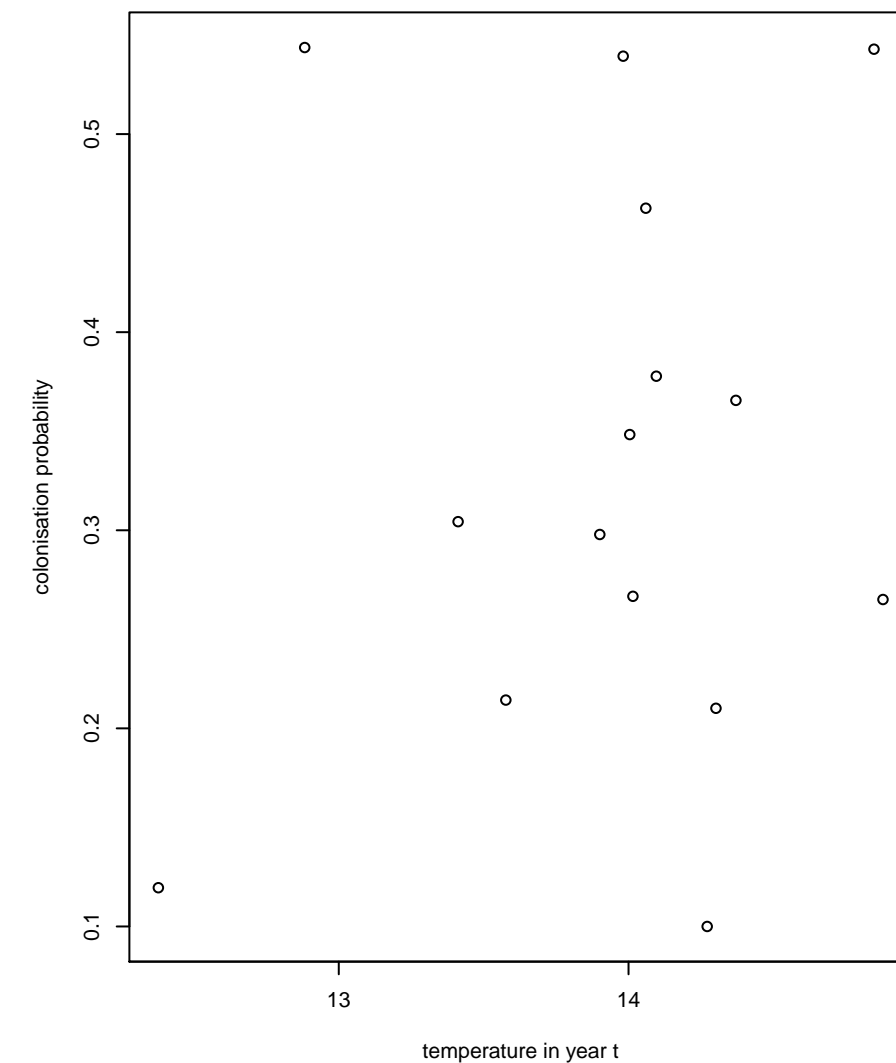

**Chorthippus albomarginatus**

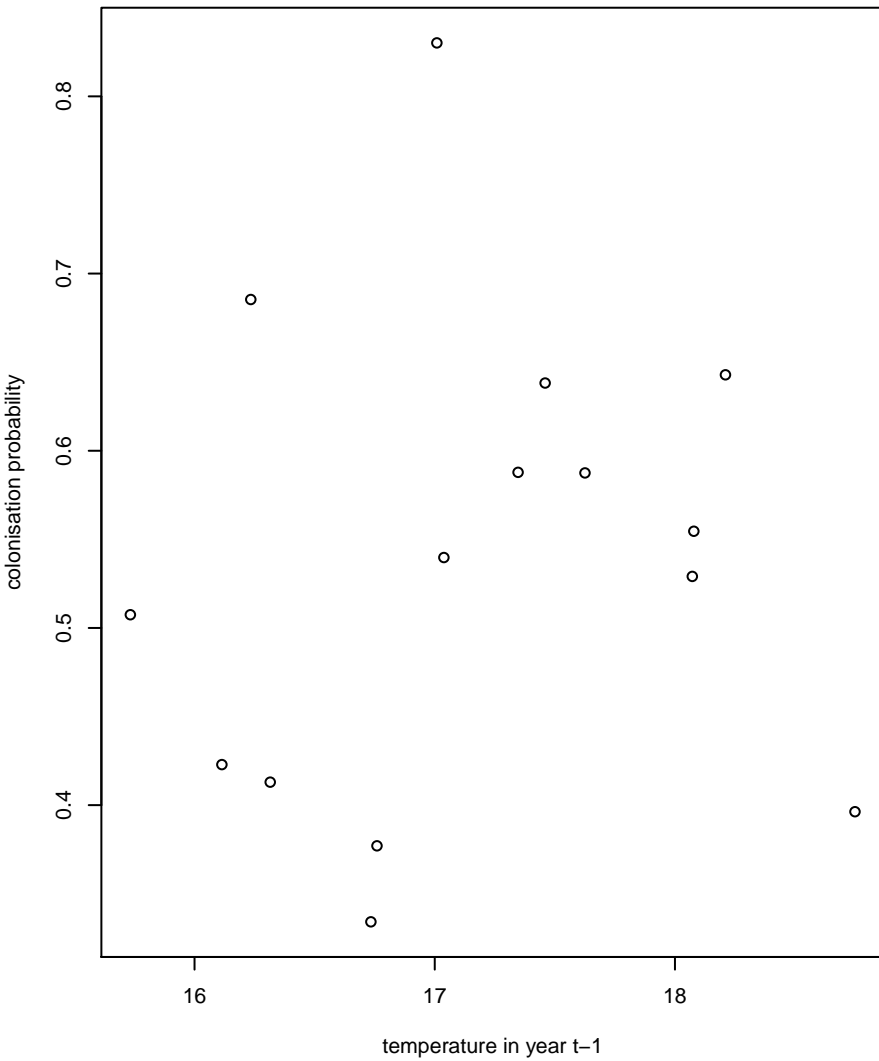

**Chorthippus albomarginatus**

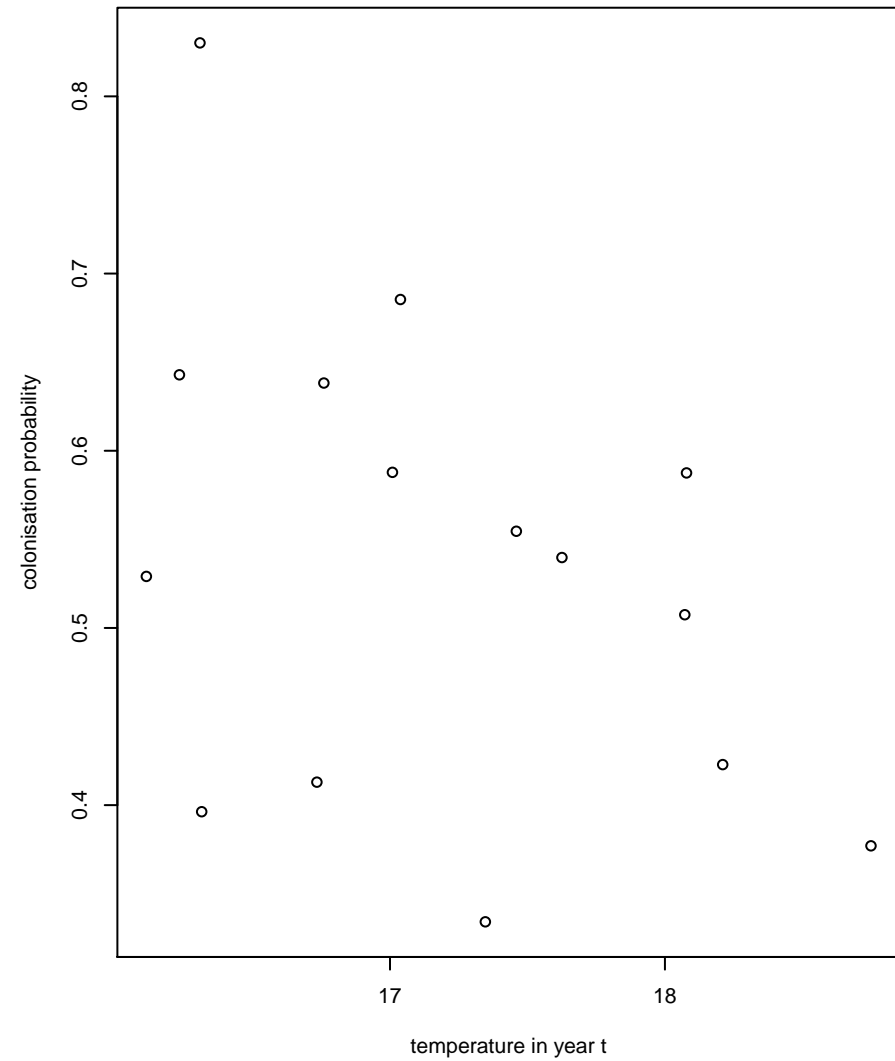

**Chorthippus biguttulus**

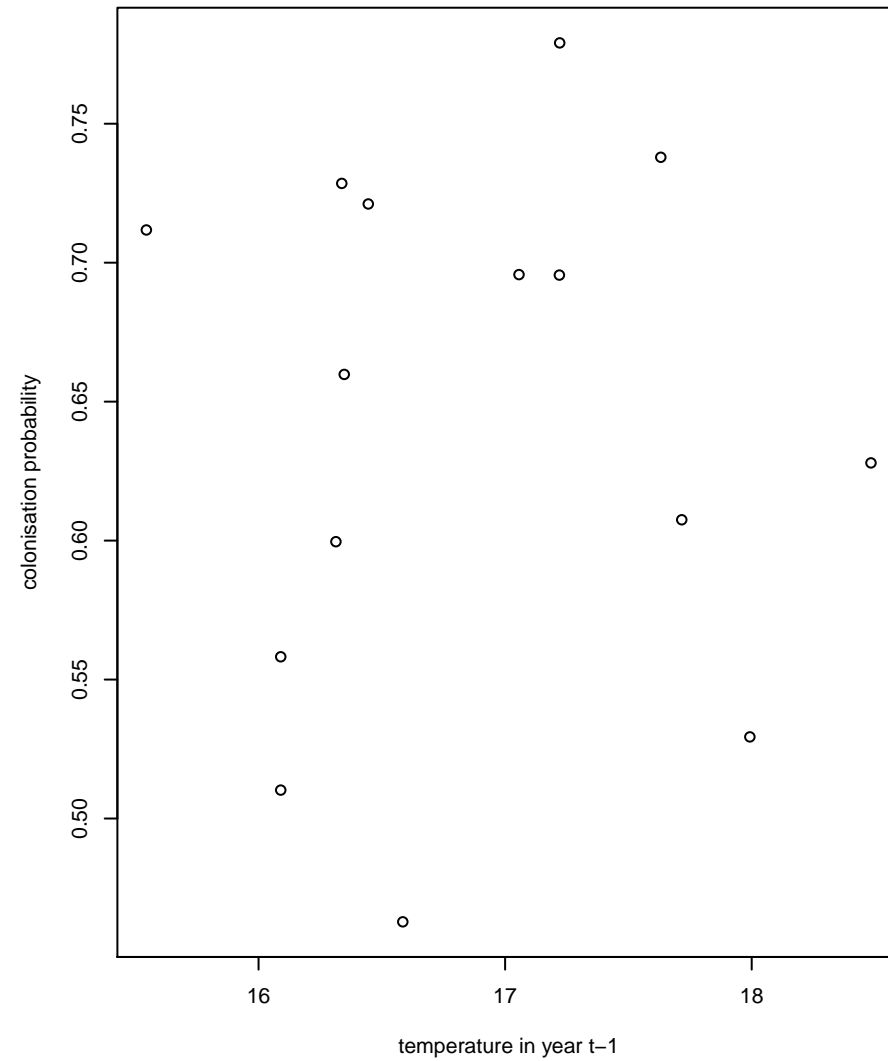

**Chorthippus biguttulus**

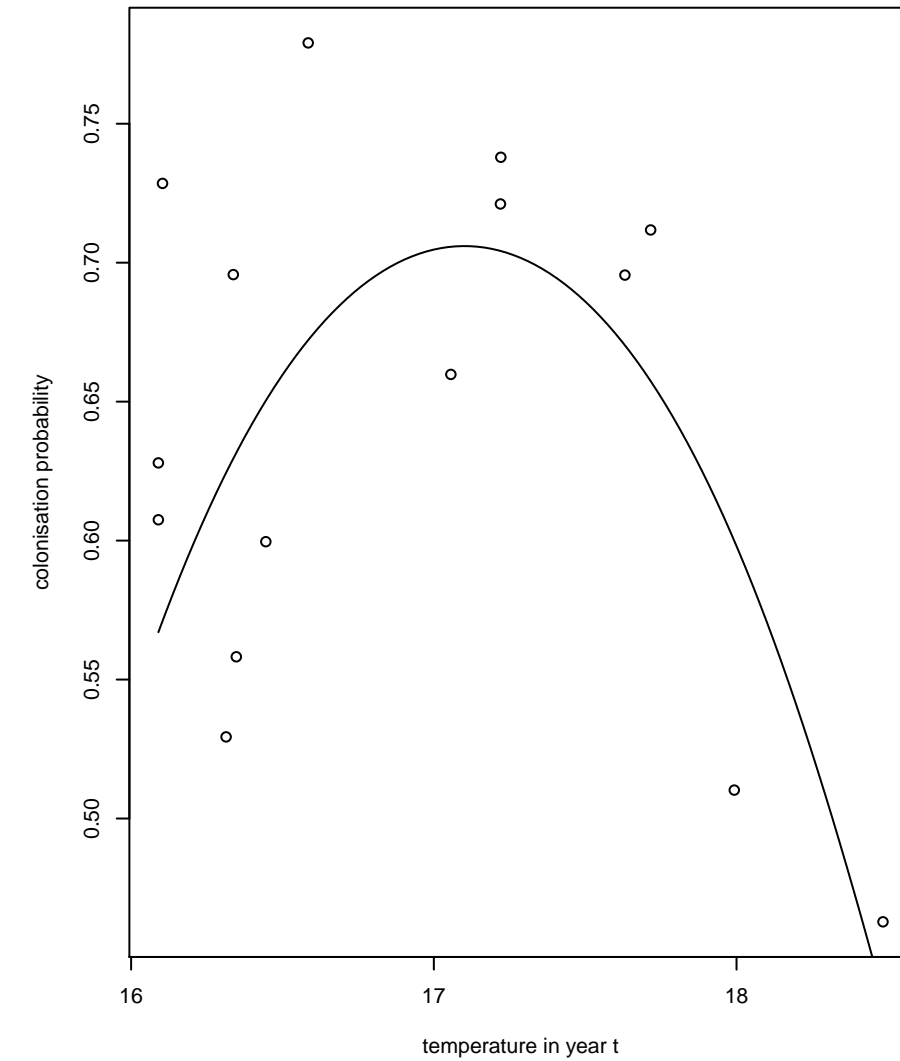

**Chorthippus brunneus**

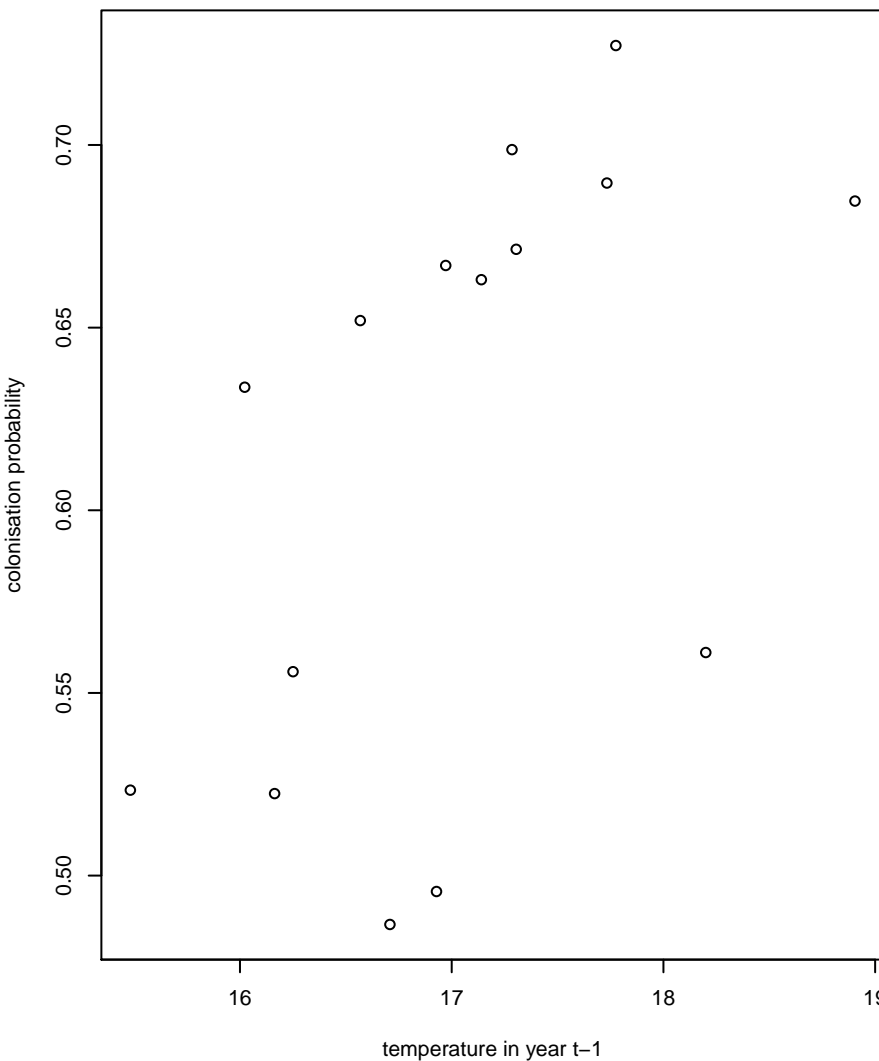

**Chorthippus brunneus**

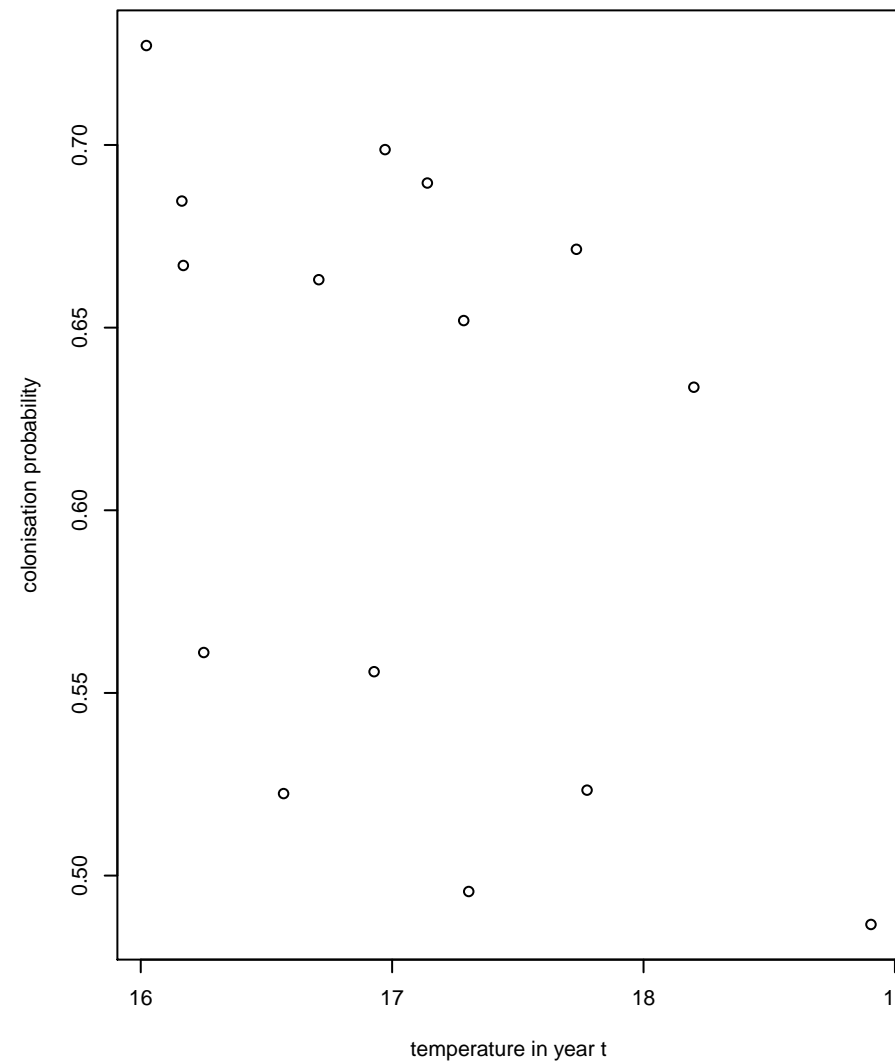

**Chorthippus mollis**

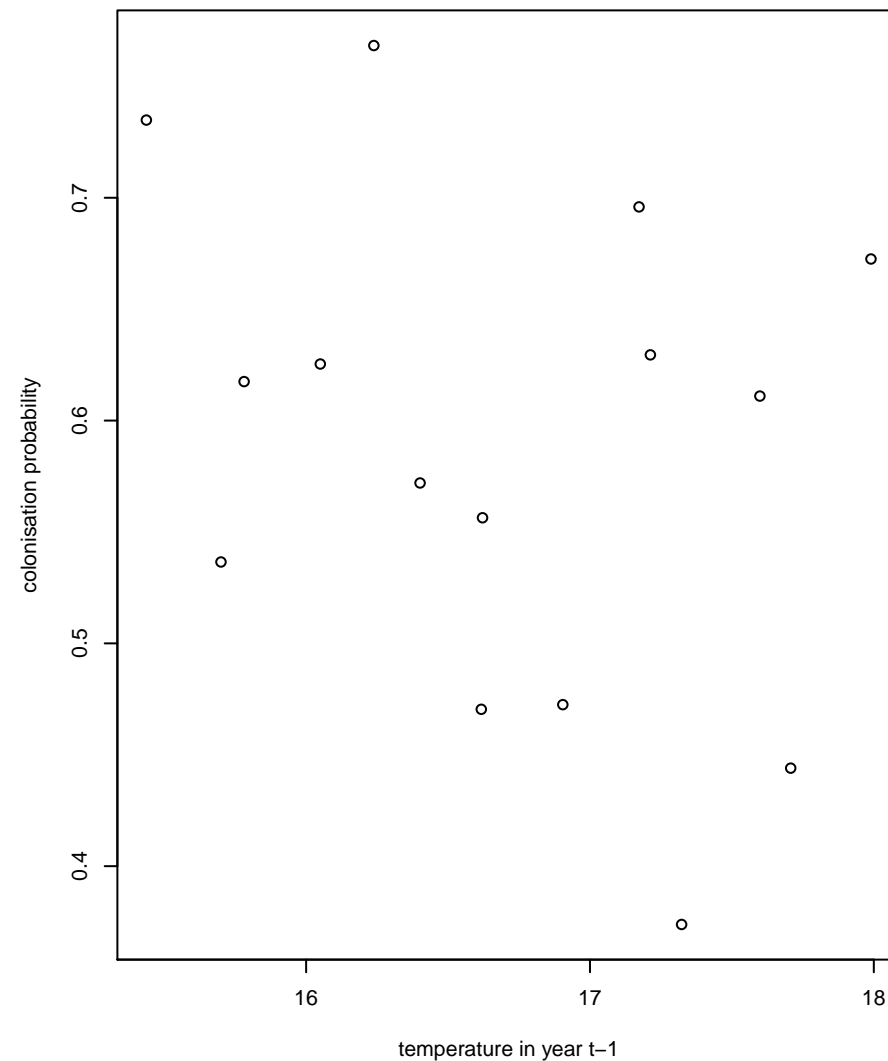

**Chorthippus mollis**

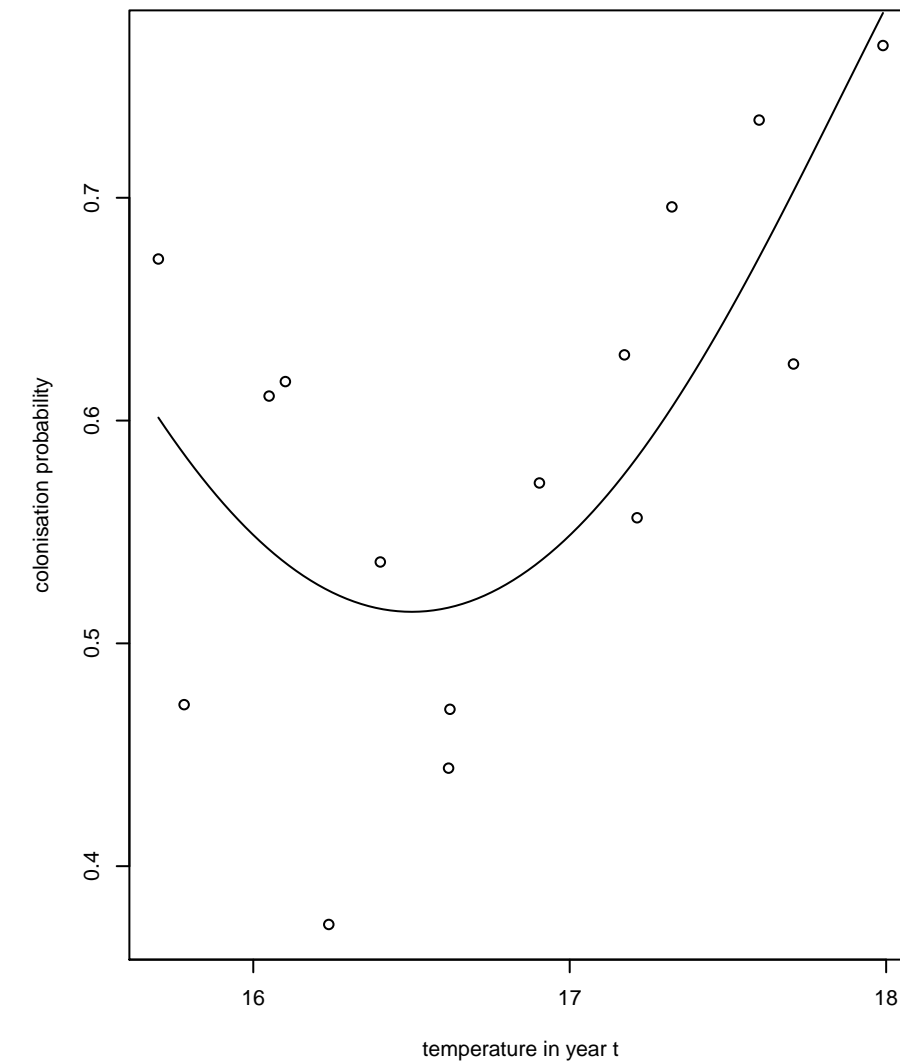

**Chorthippus montanus**

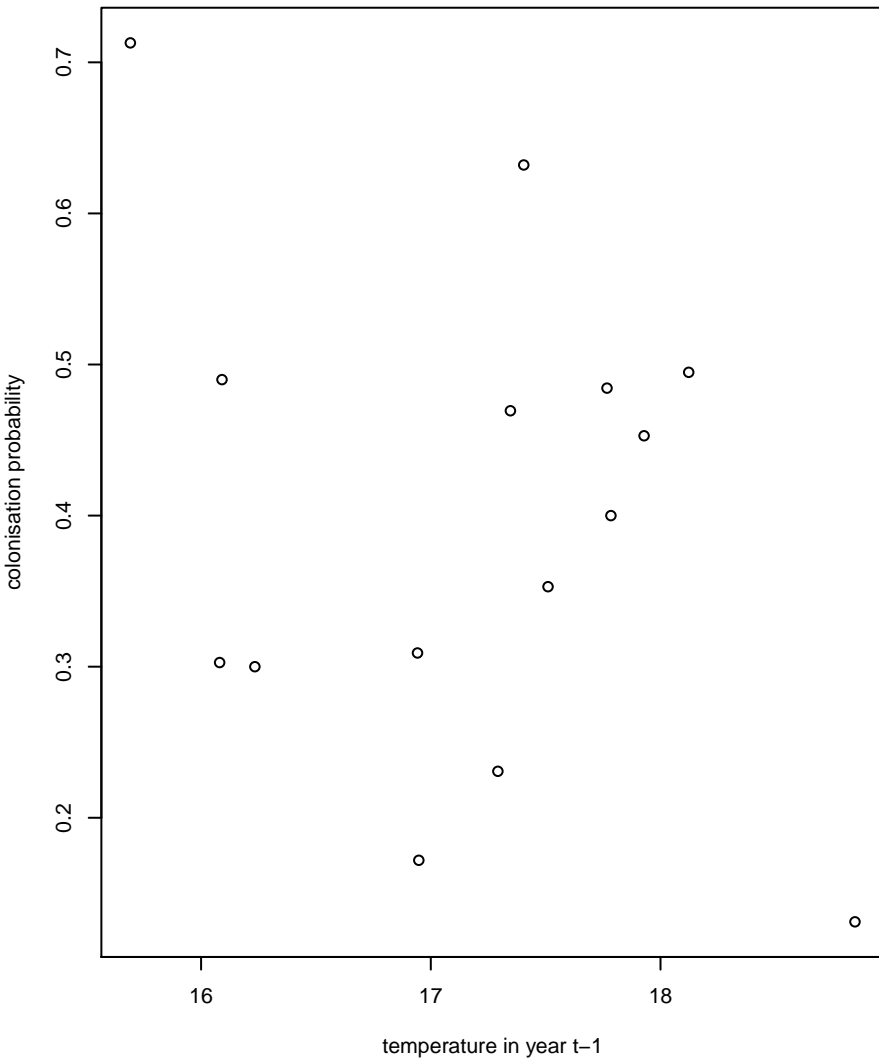

**Chorthippus montanus**

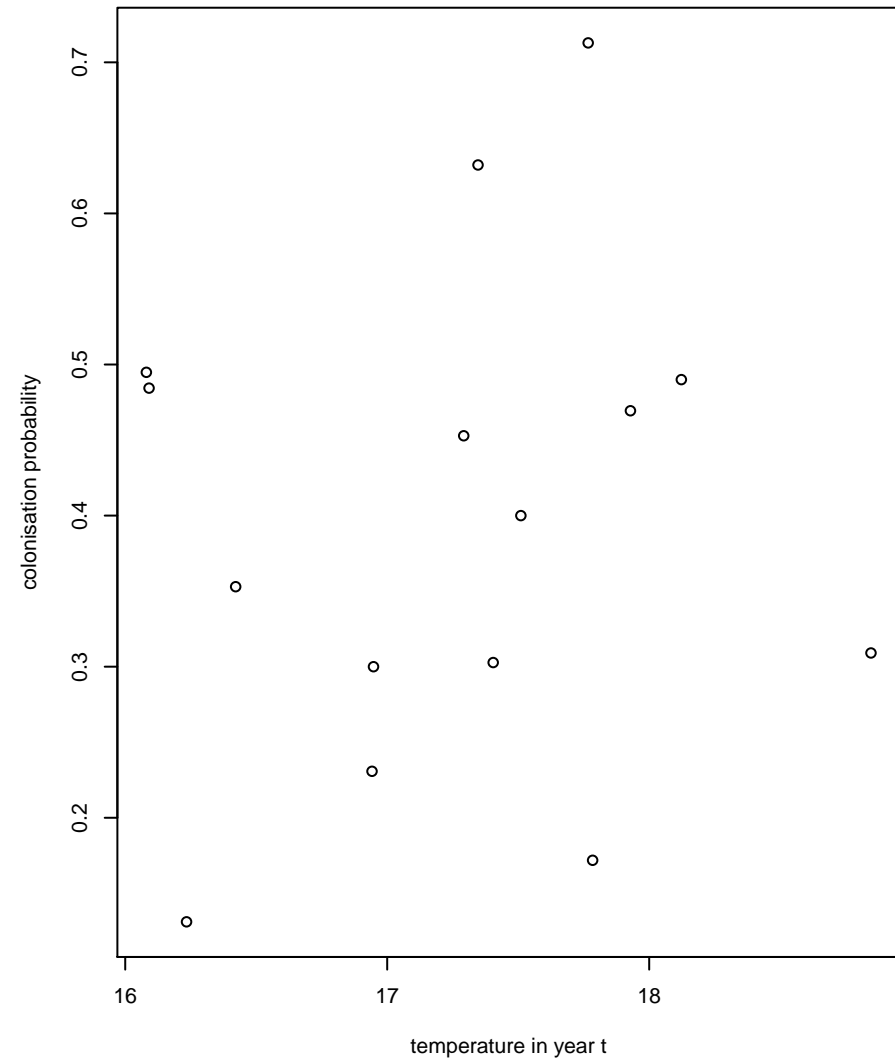

**Chorthippus parallelus**

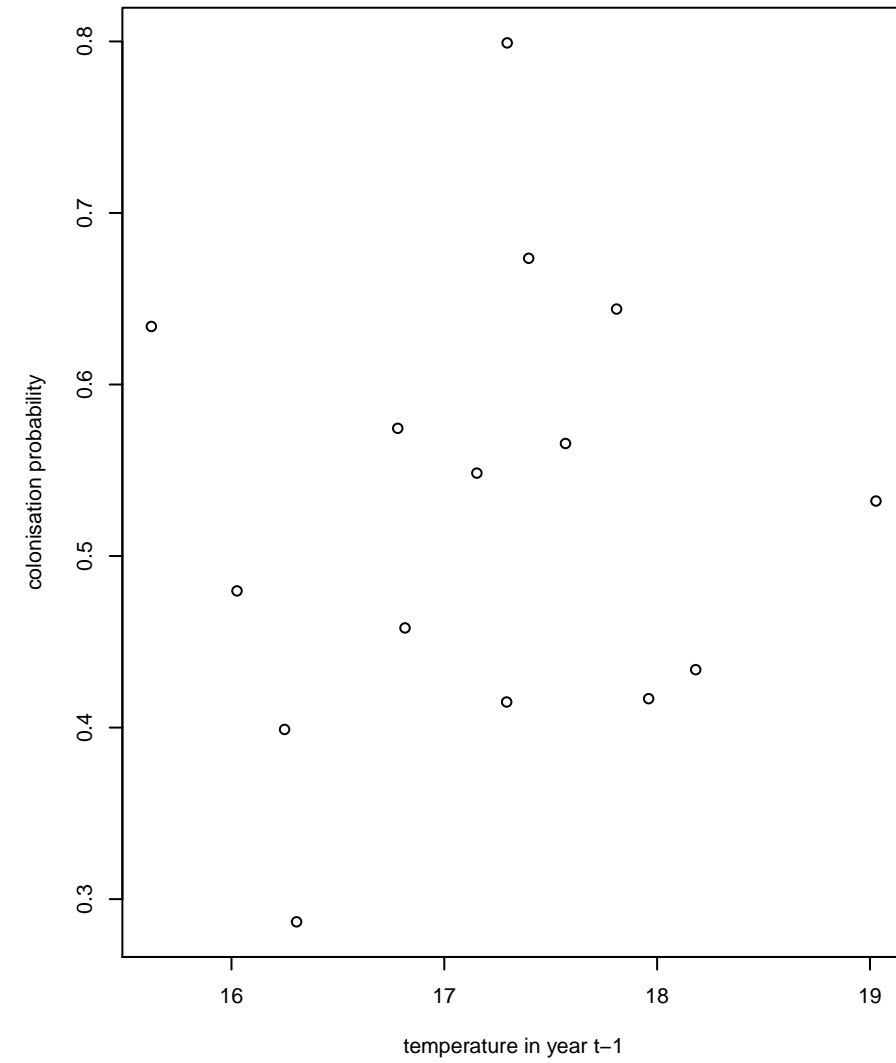

**Chorthippus parallelus**

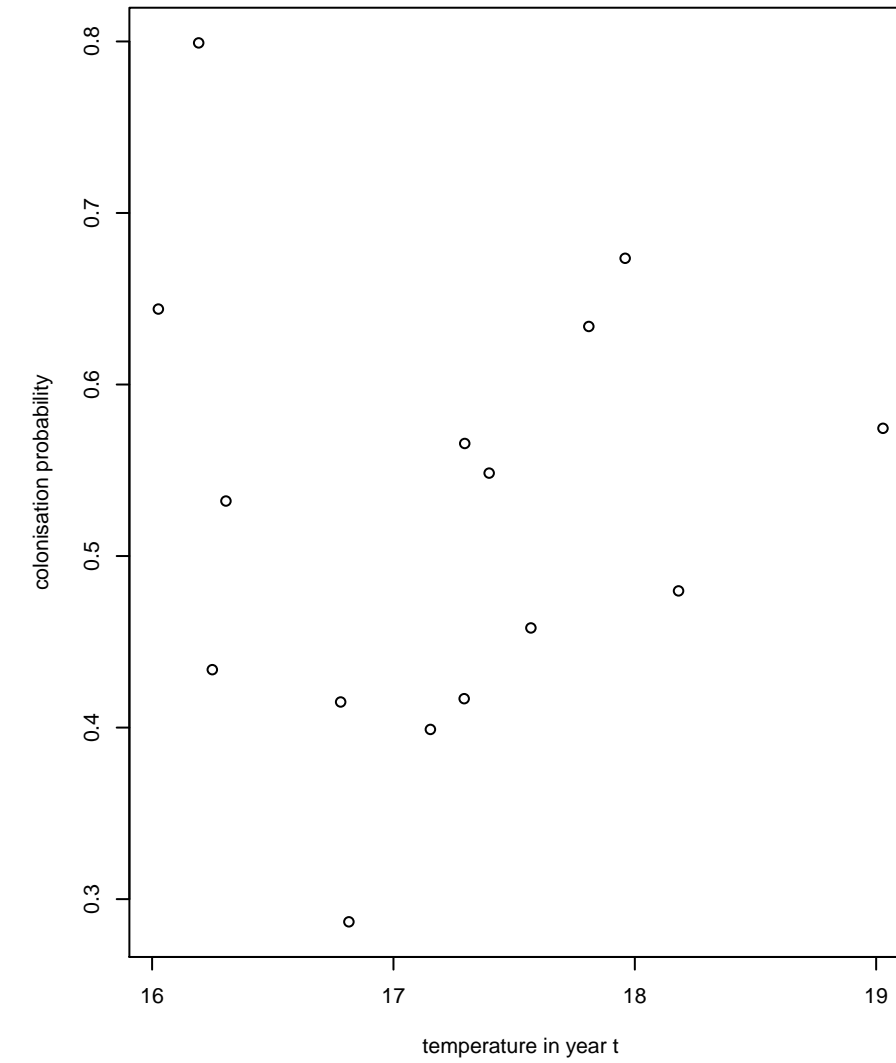

**Chrysochraon dispar**

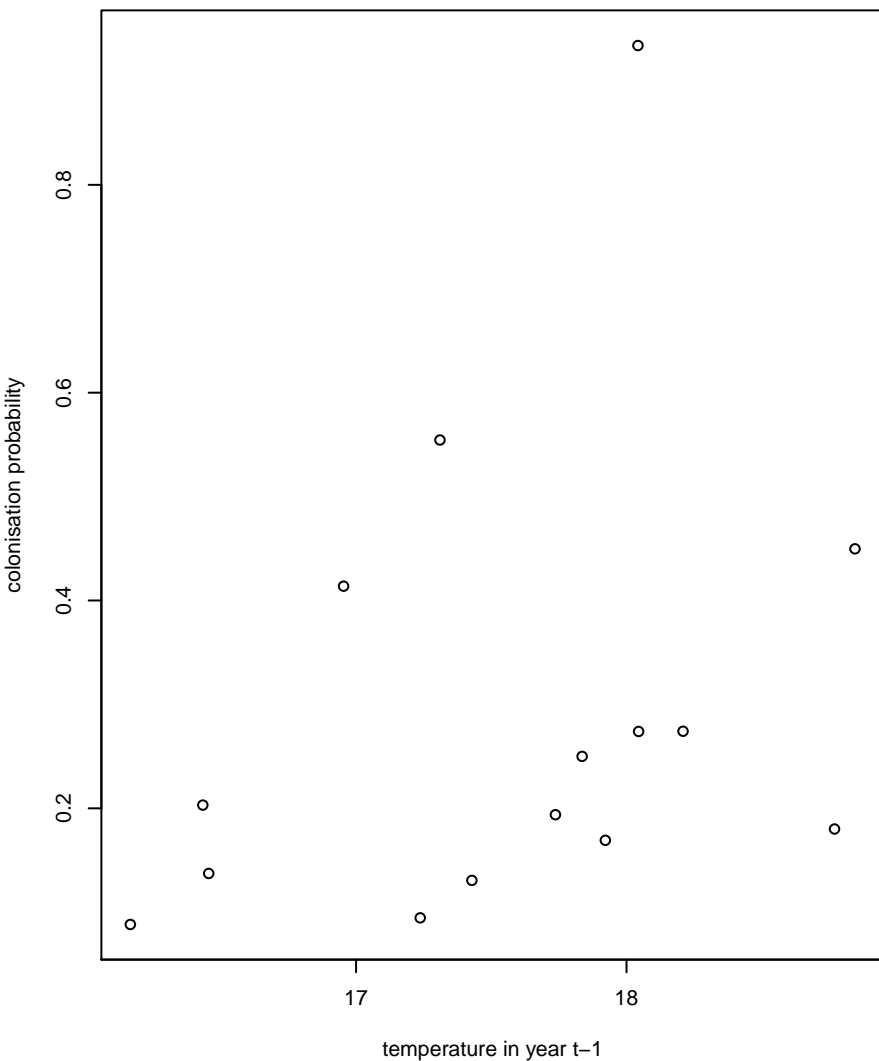

**Chrysochraon dispar**

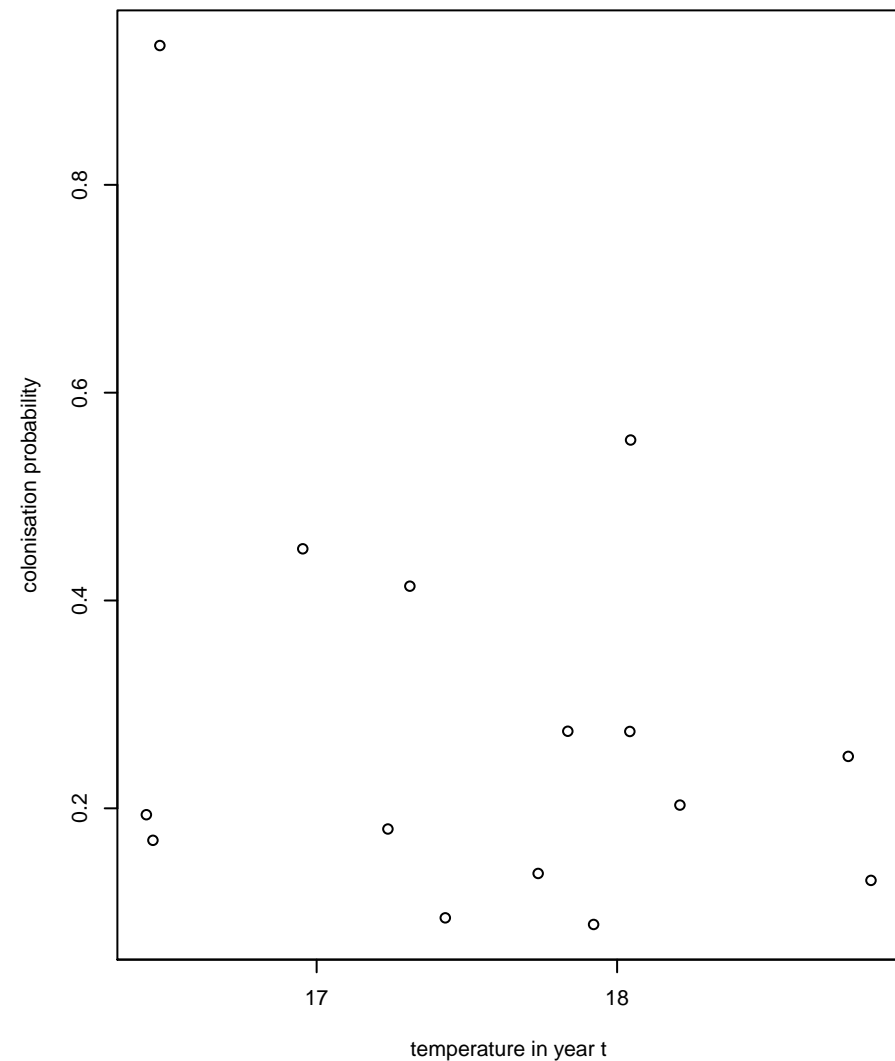

**Conocephalus discolor**

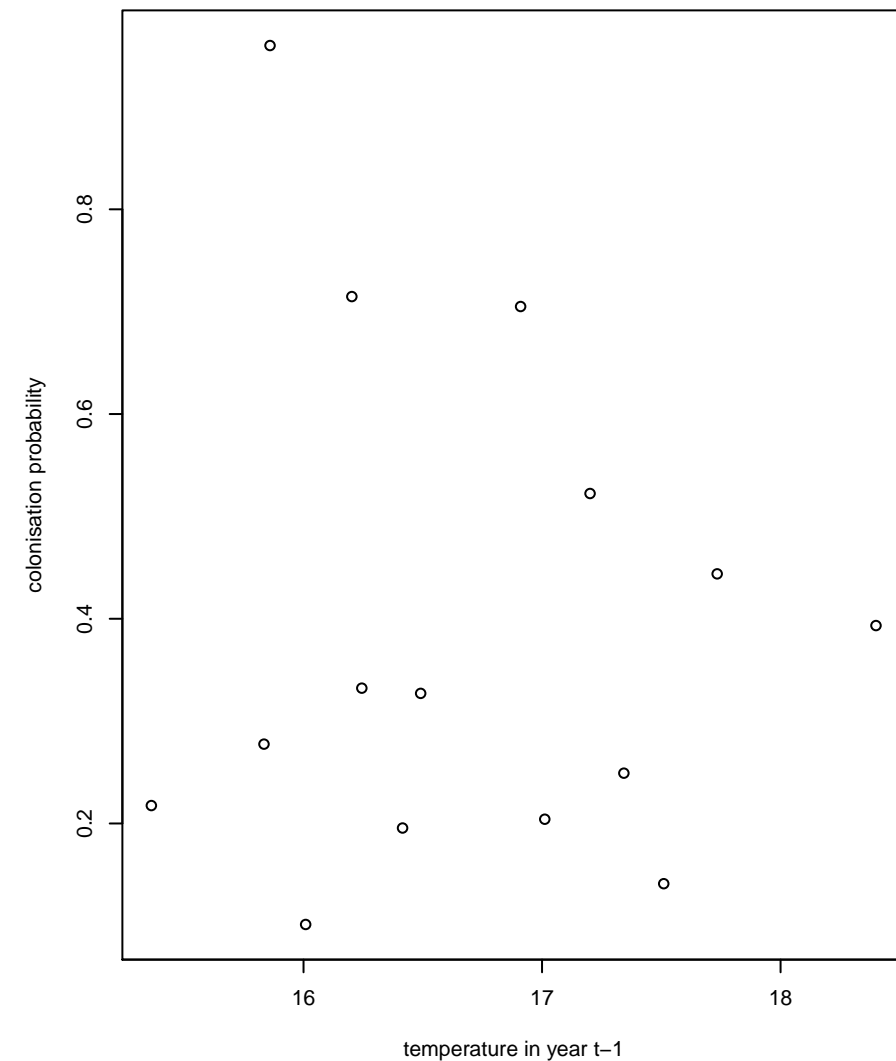

**Conocephalus discolor**

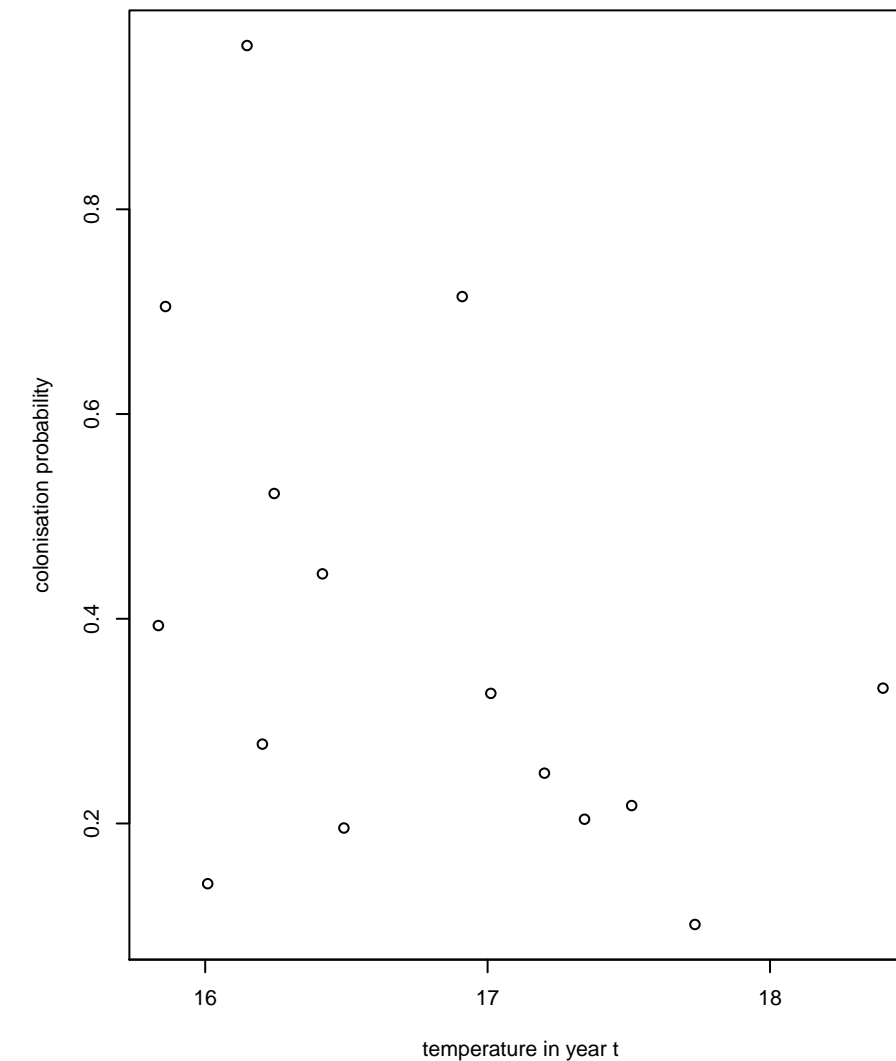

**Conocephalus dorsalis**

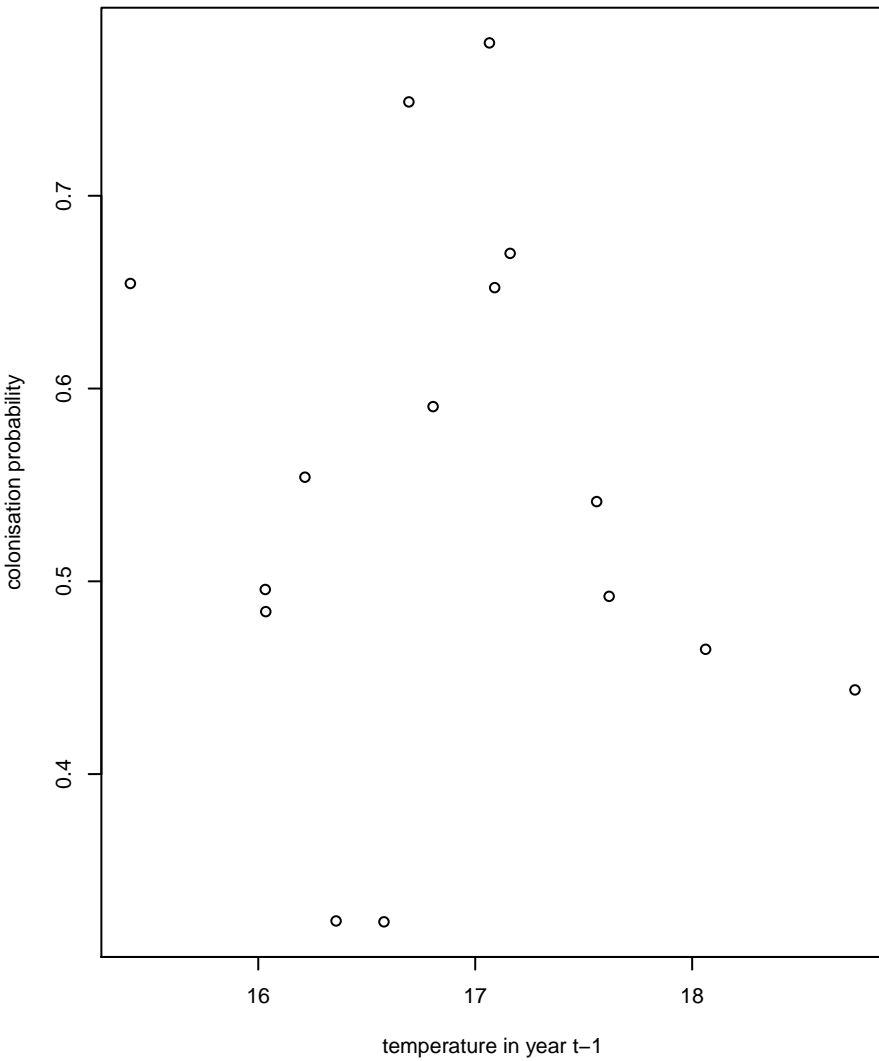

**Conocephalus dorsalis**

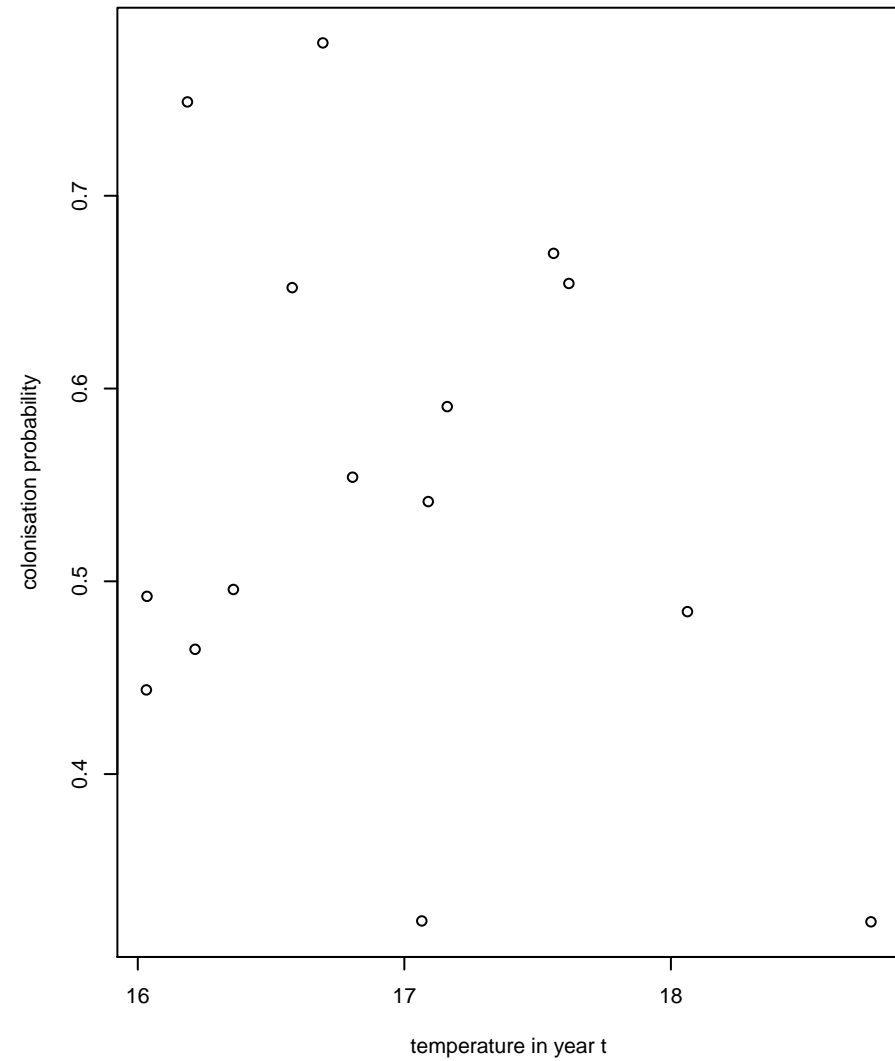

**Ephippiger ephippiger**

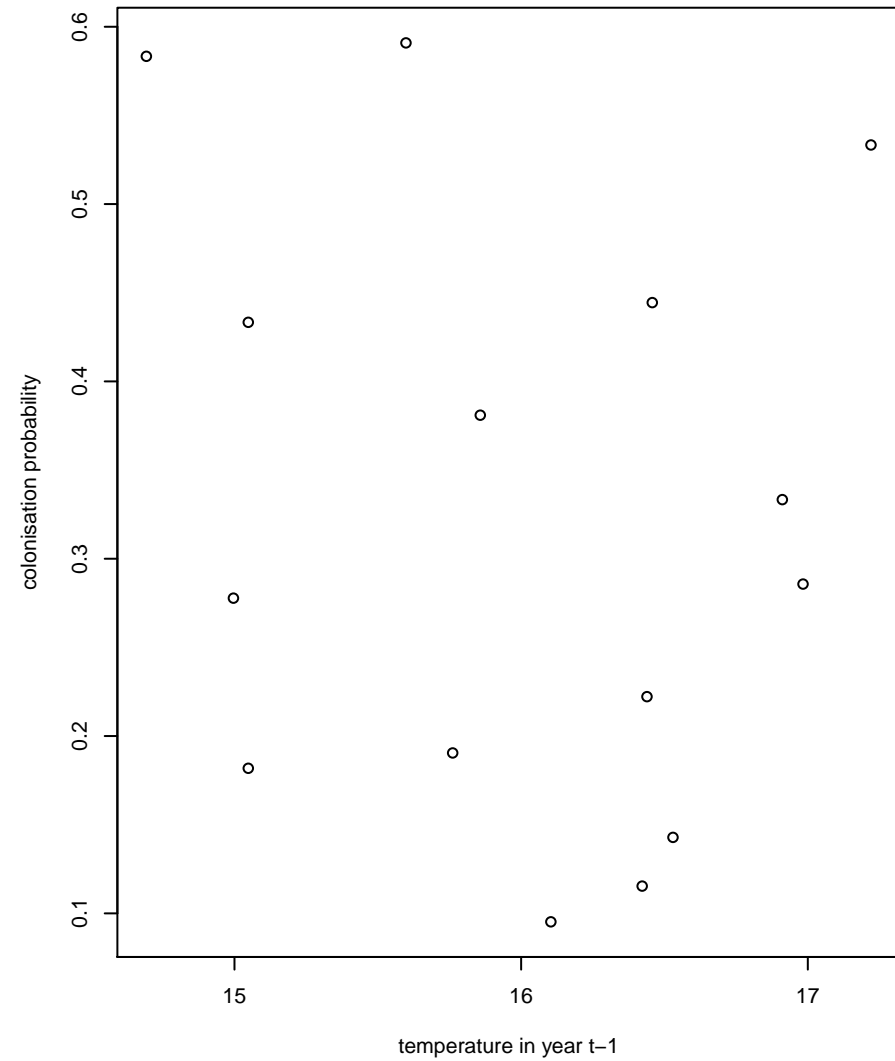

**Ephippiger ephippiger**

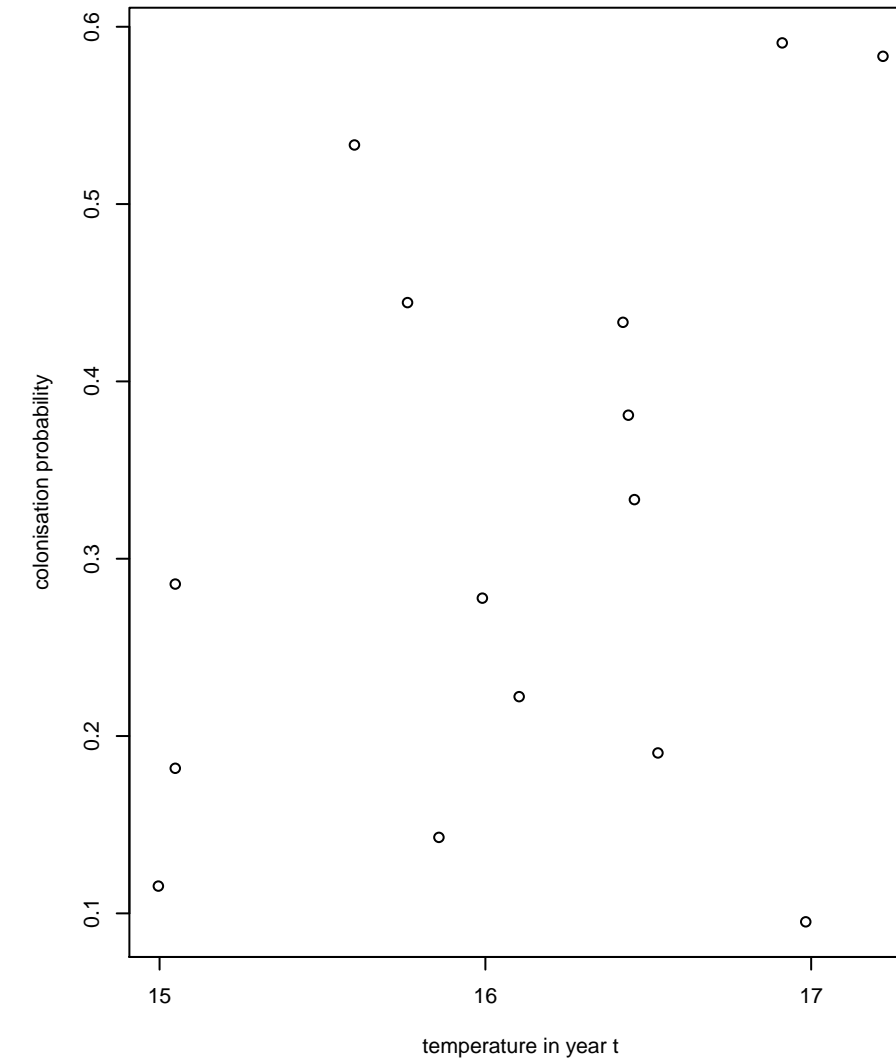

**Leptophyes punctatissima**

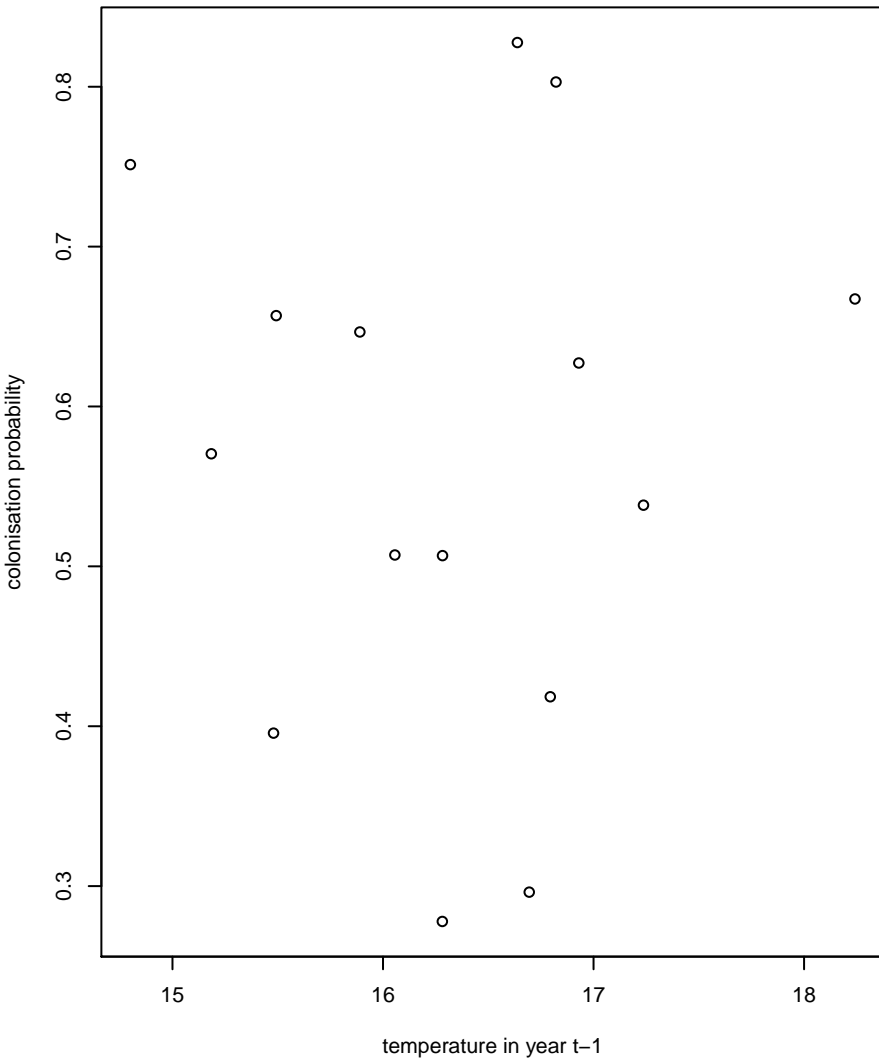

**Leptophyes punctatissima**

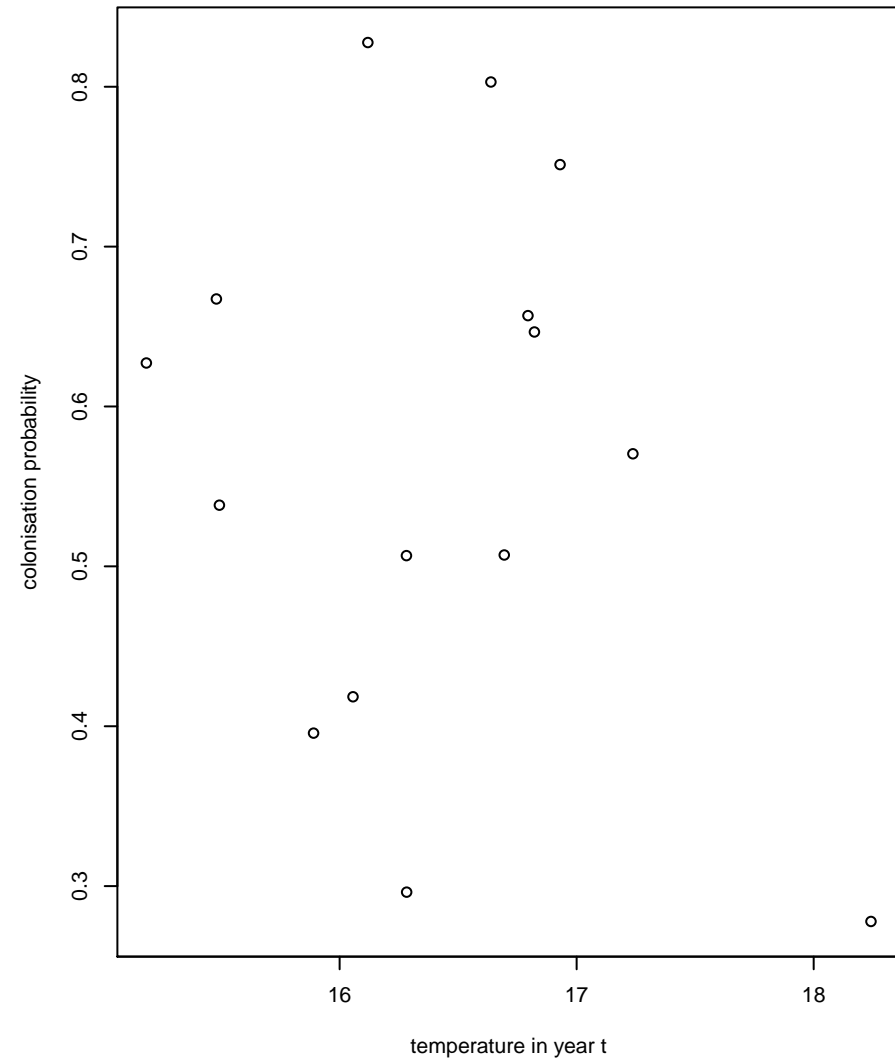

**Meconema meridionale**

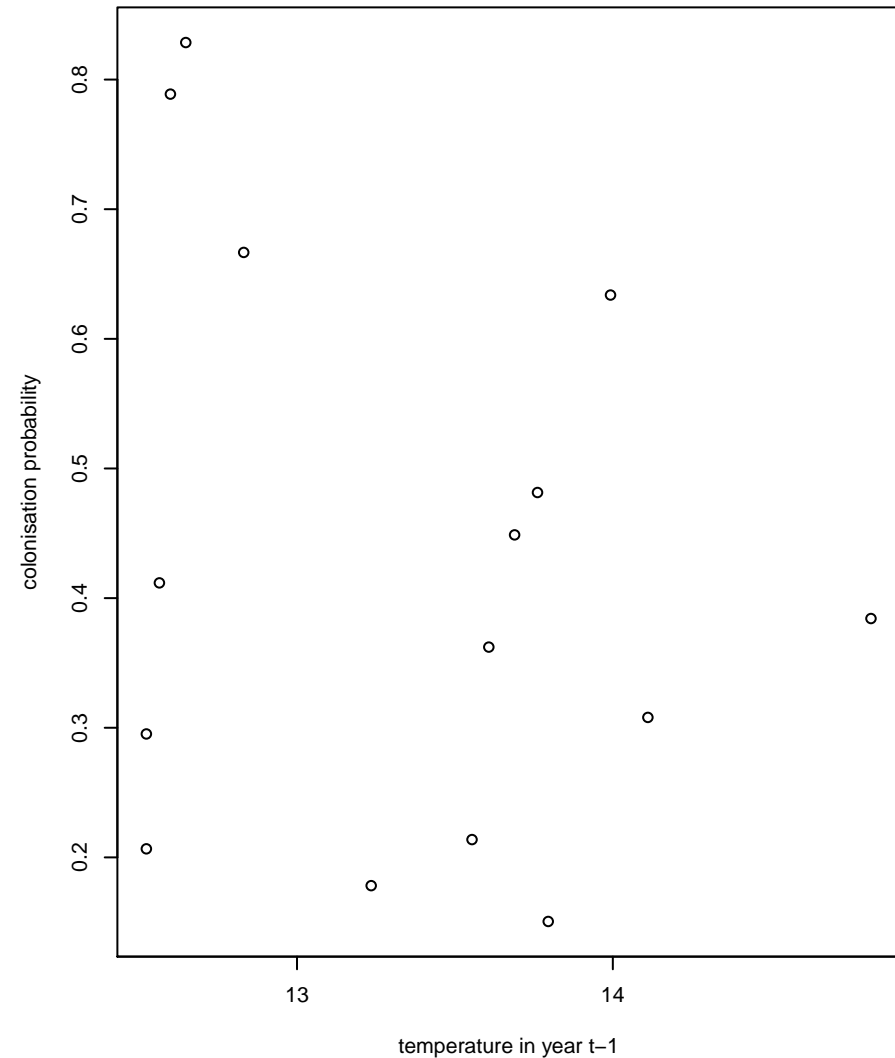

**Meconema meridionale**

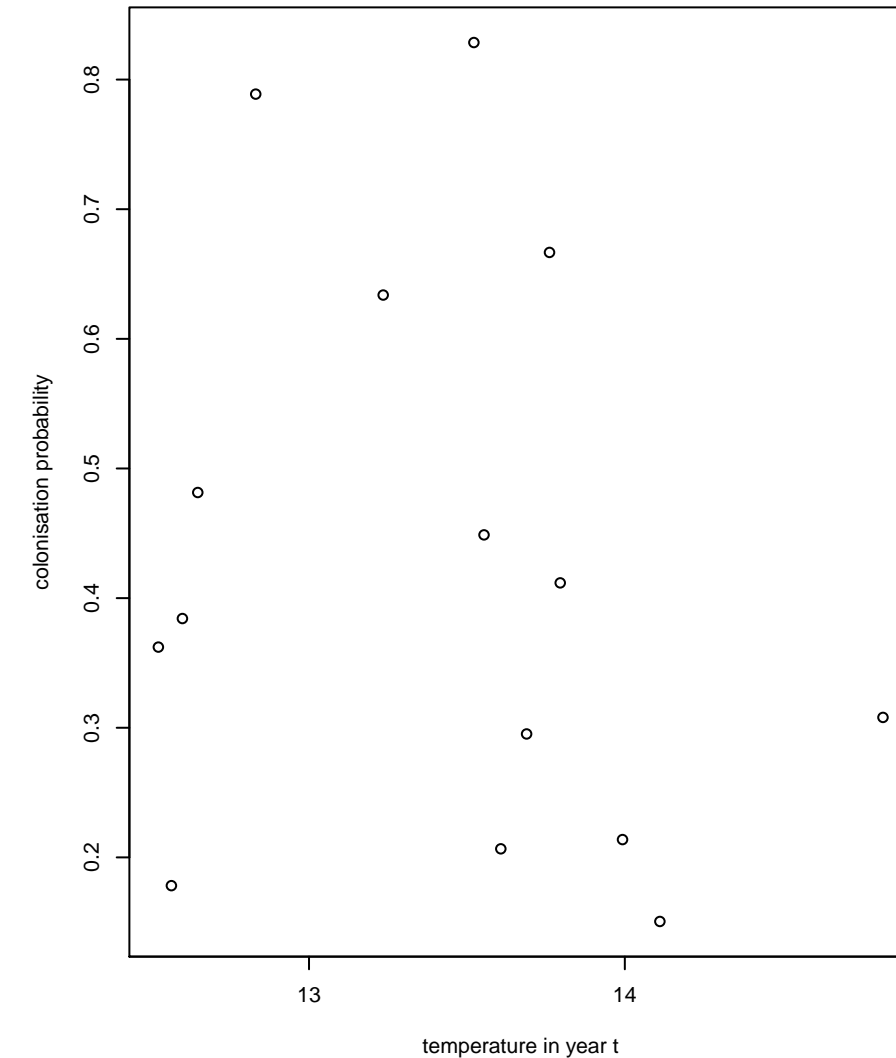

**Meconema thalassinum**

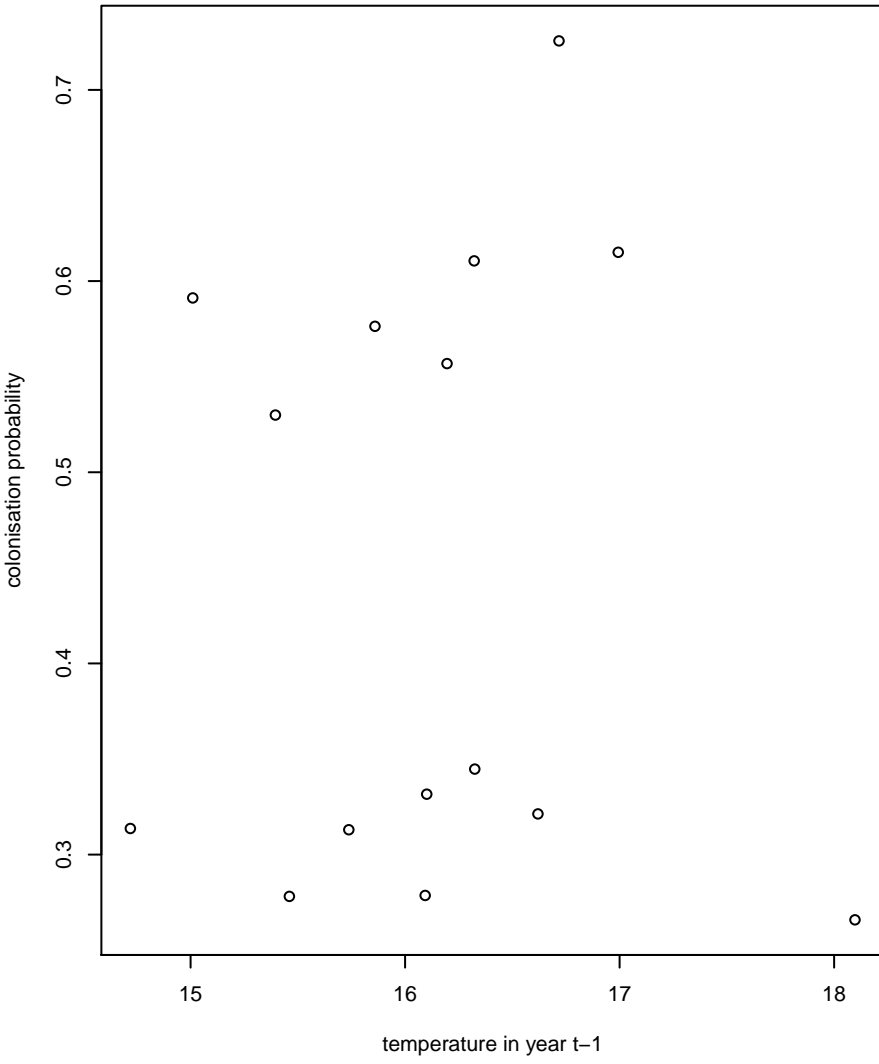

**Meconema thalassinum**

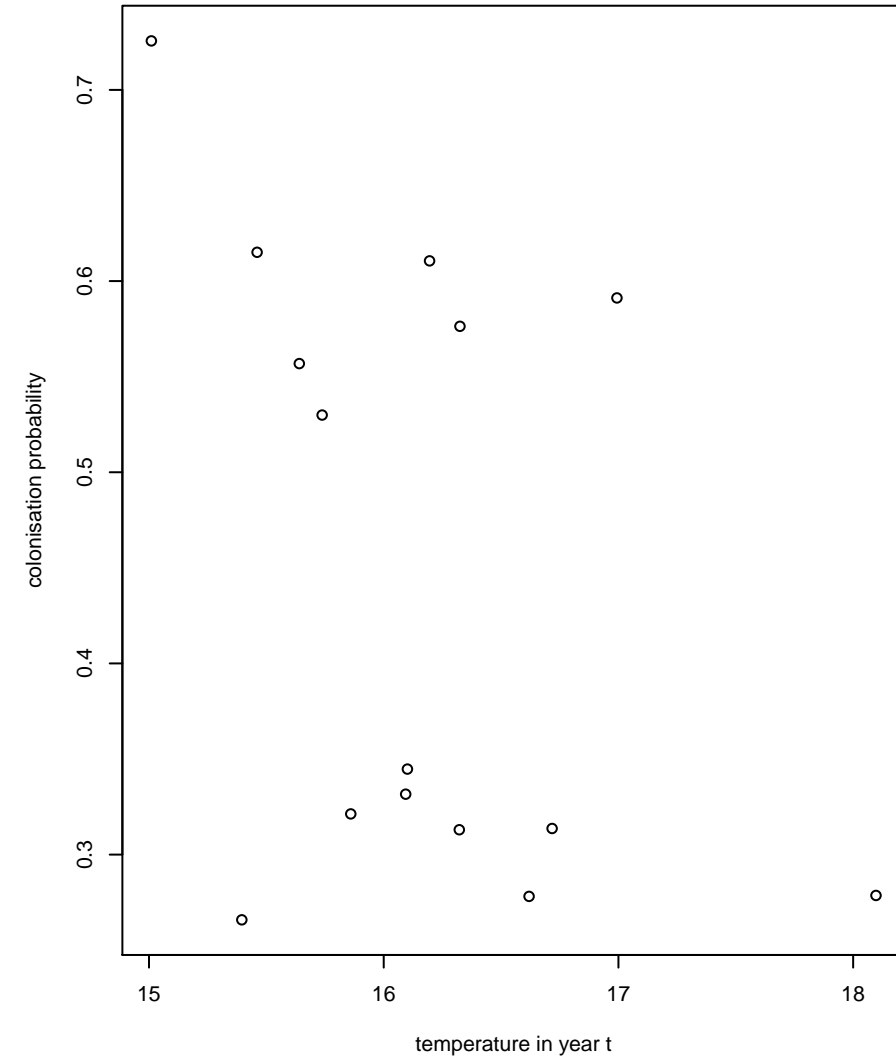

**Metrioptera brachyptera**

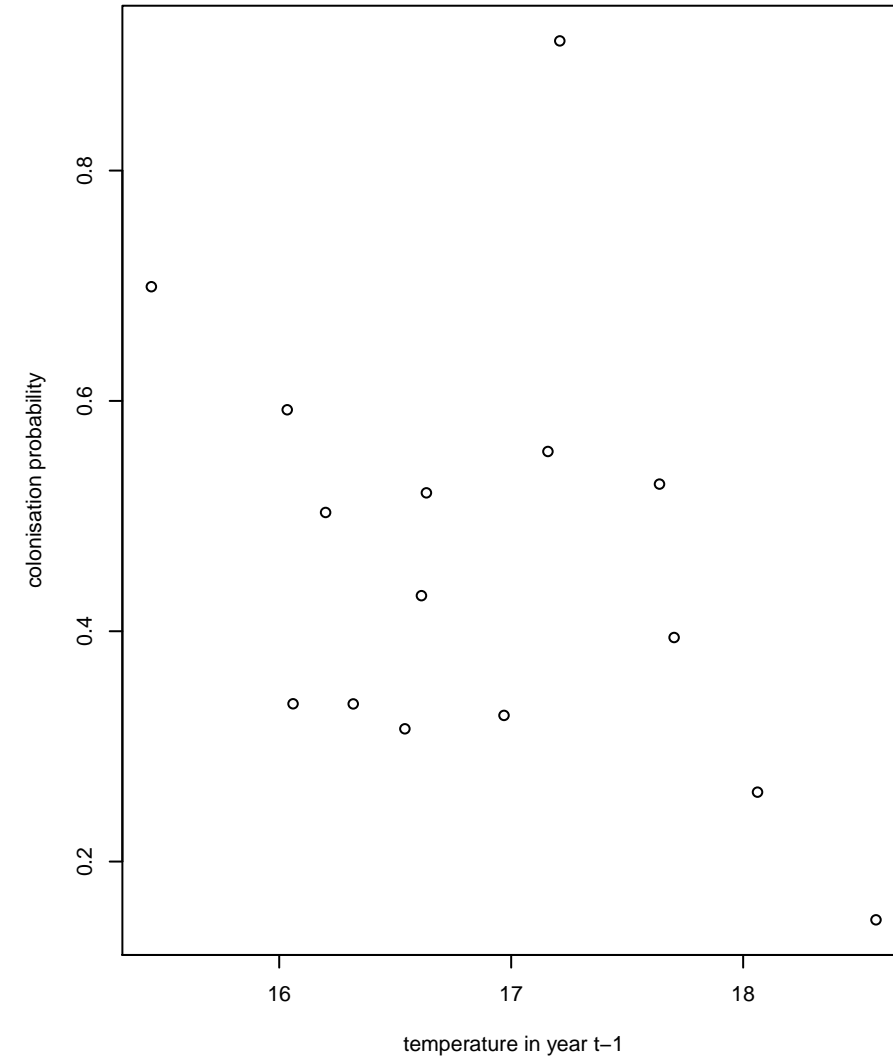

**Metrioptera brachyptera**

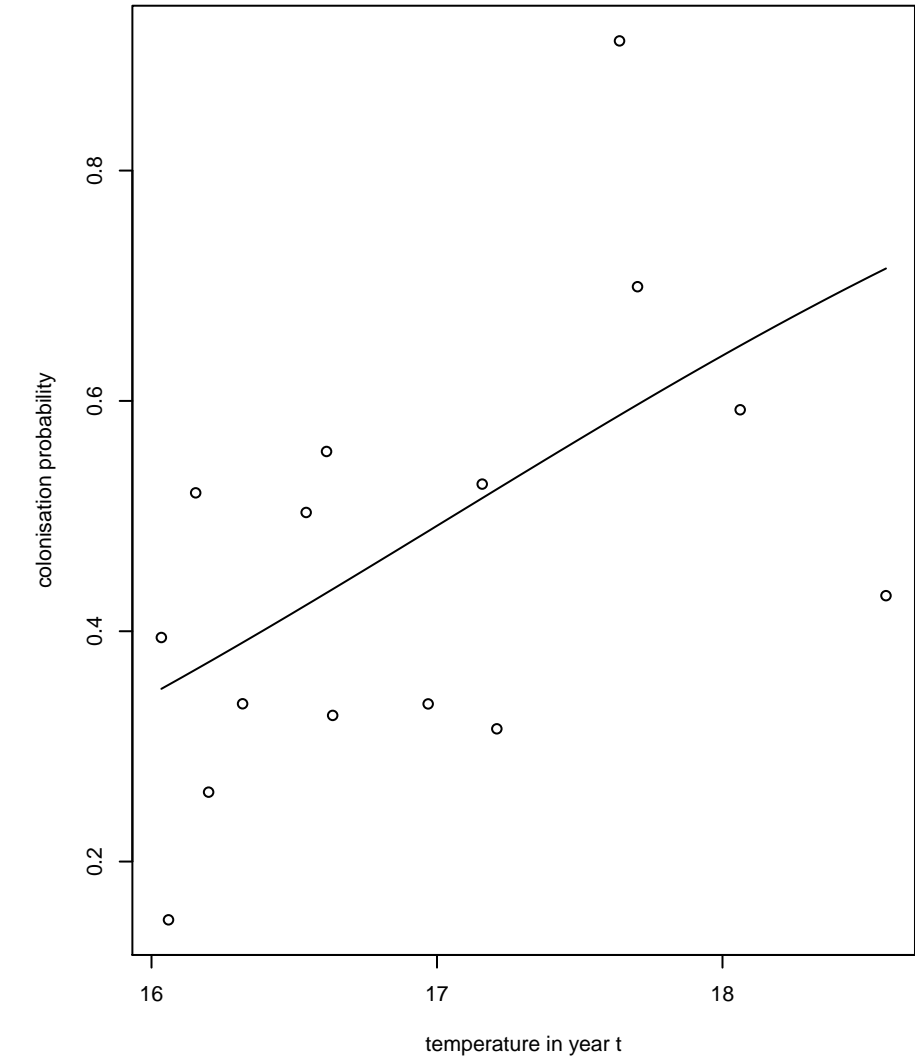

**Metrioptera roeselii**

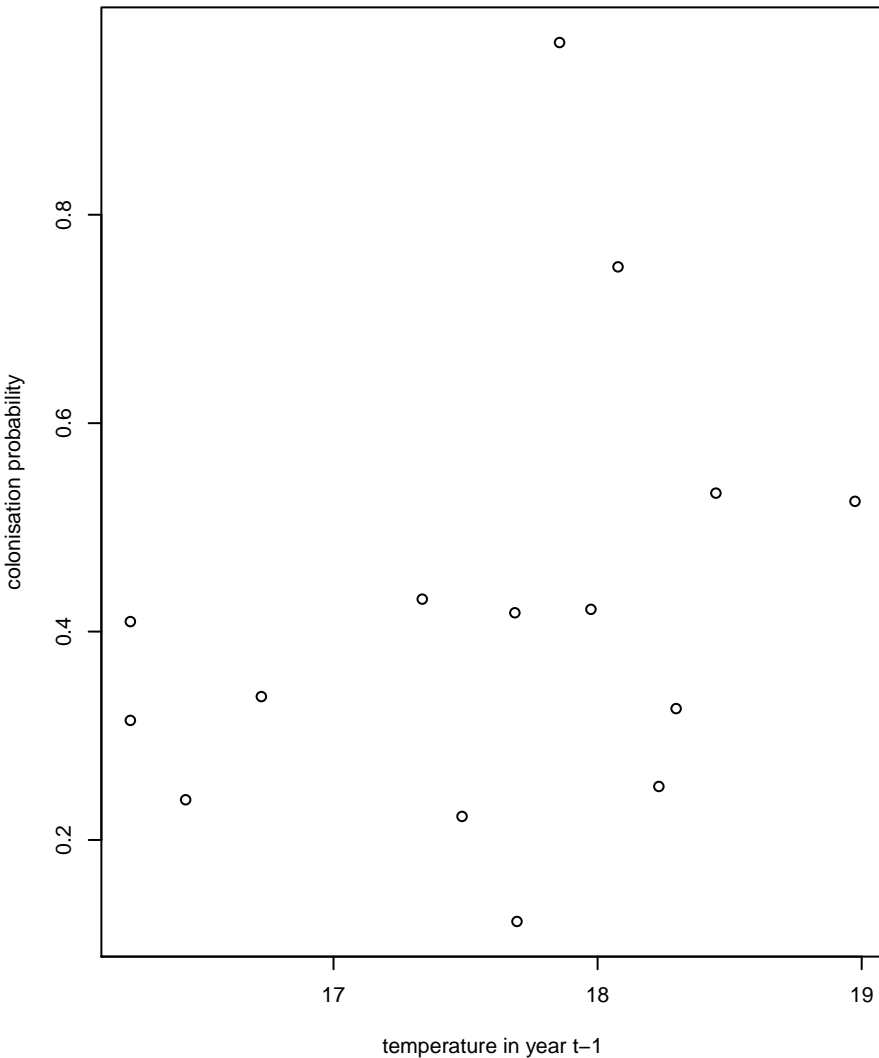

**Metrioptera roeselii**

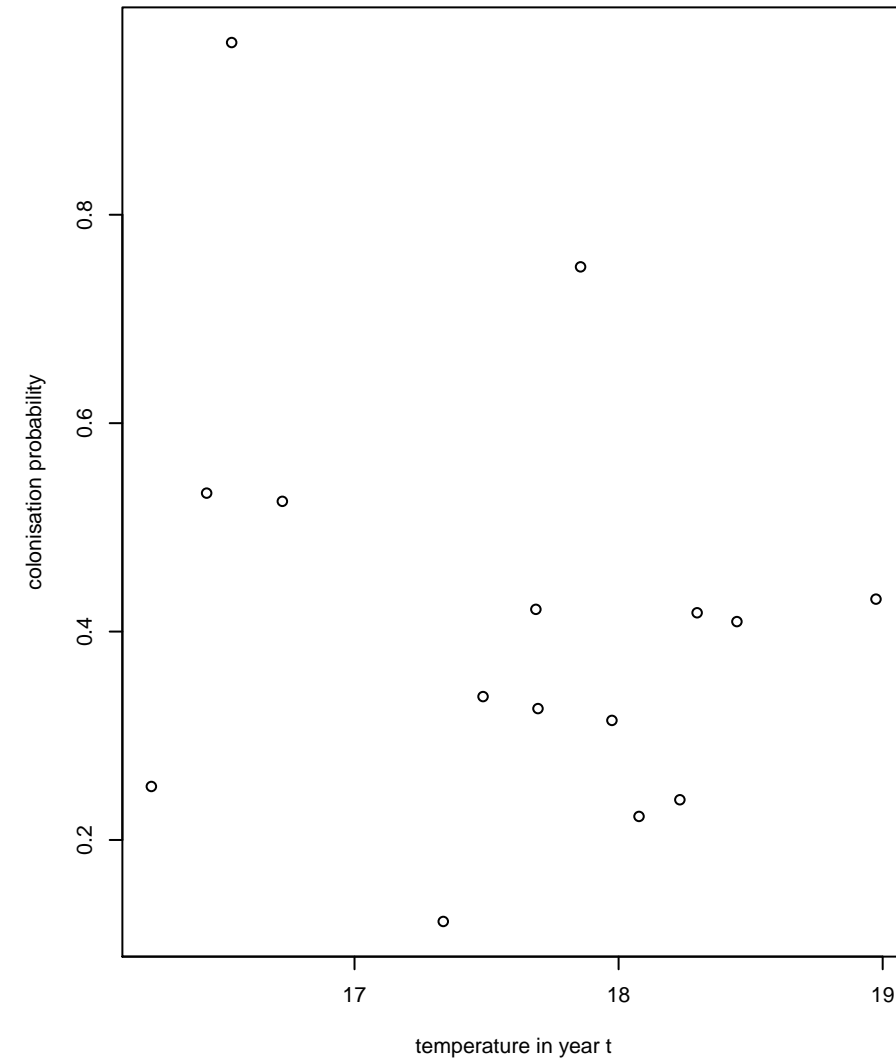

**Myrmeleotettix maculatus**

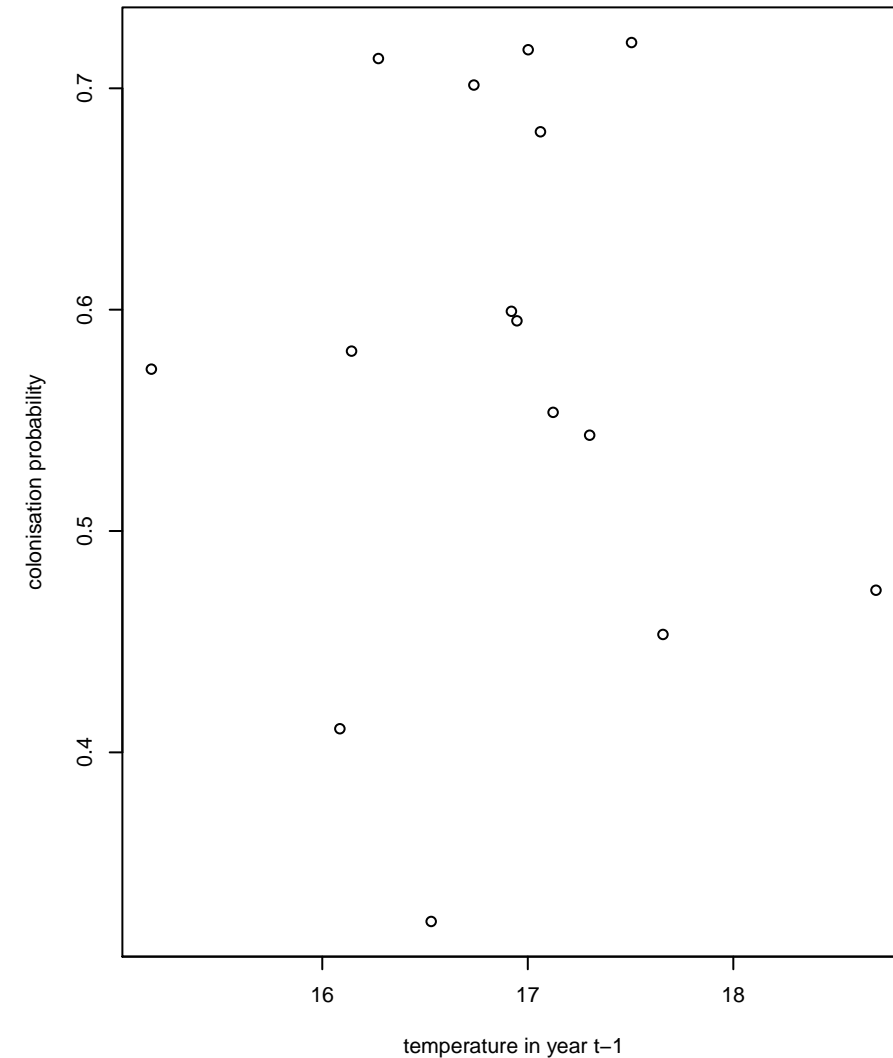

**Myrmeleotettix maculatus**

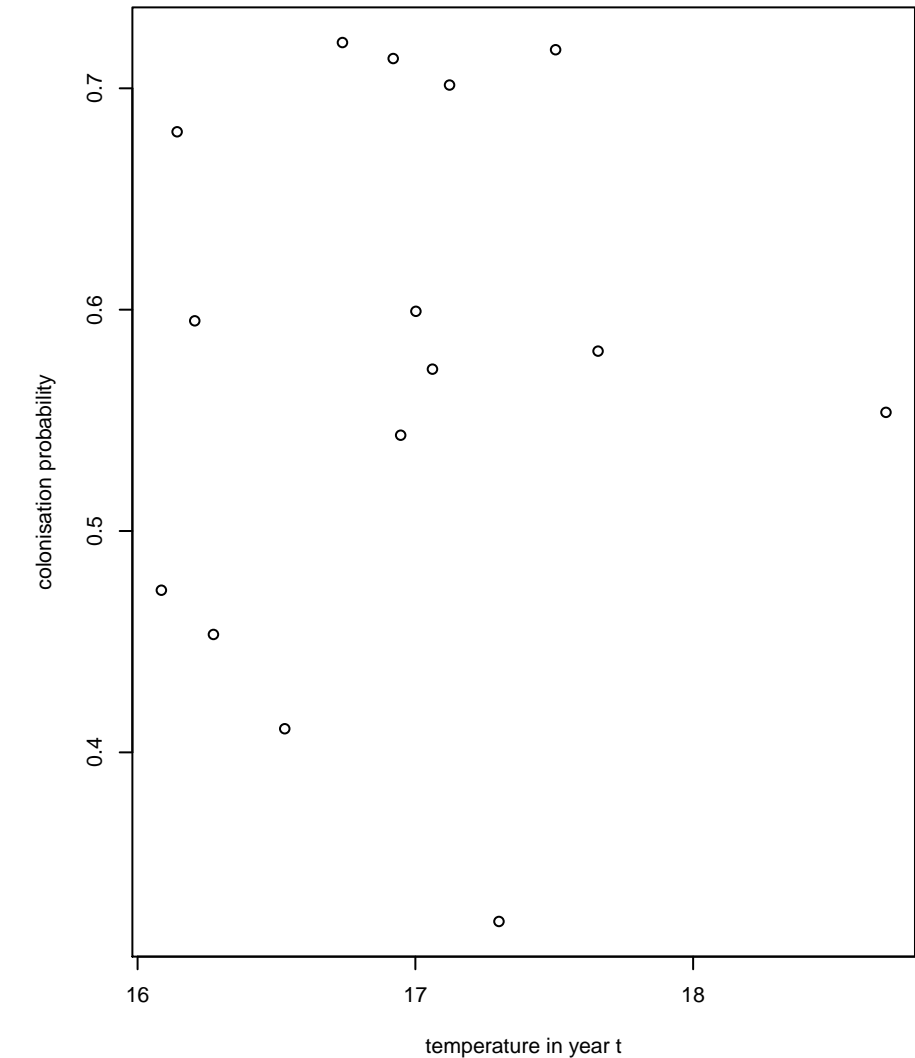

**Nemobius sylvestris**

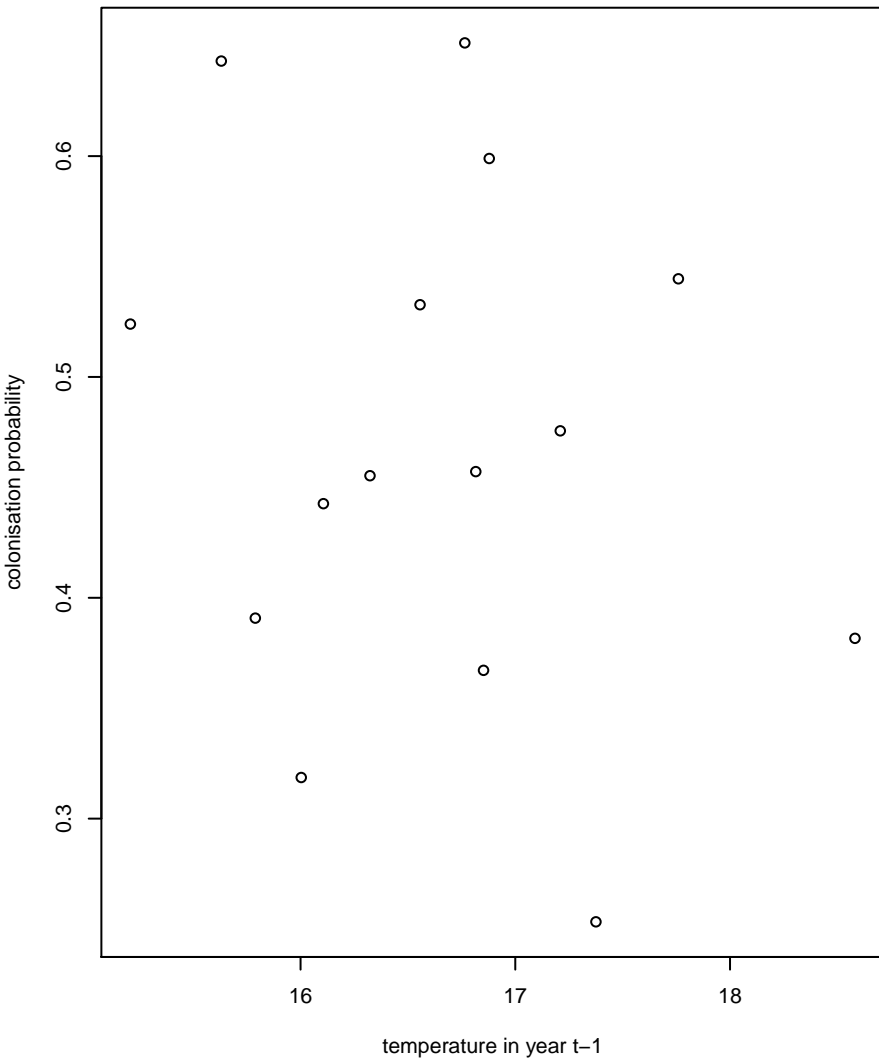

**Nemobius sylvestris**

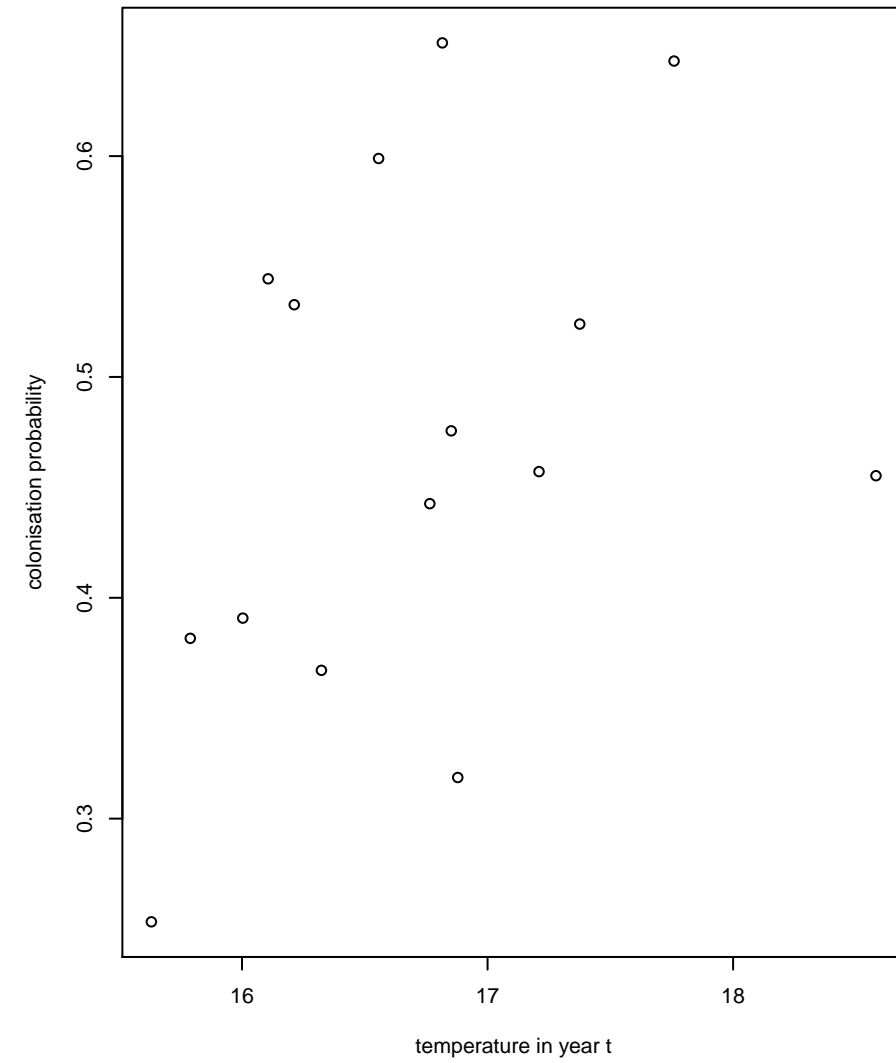

**Oecanthus pellucens**

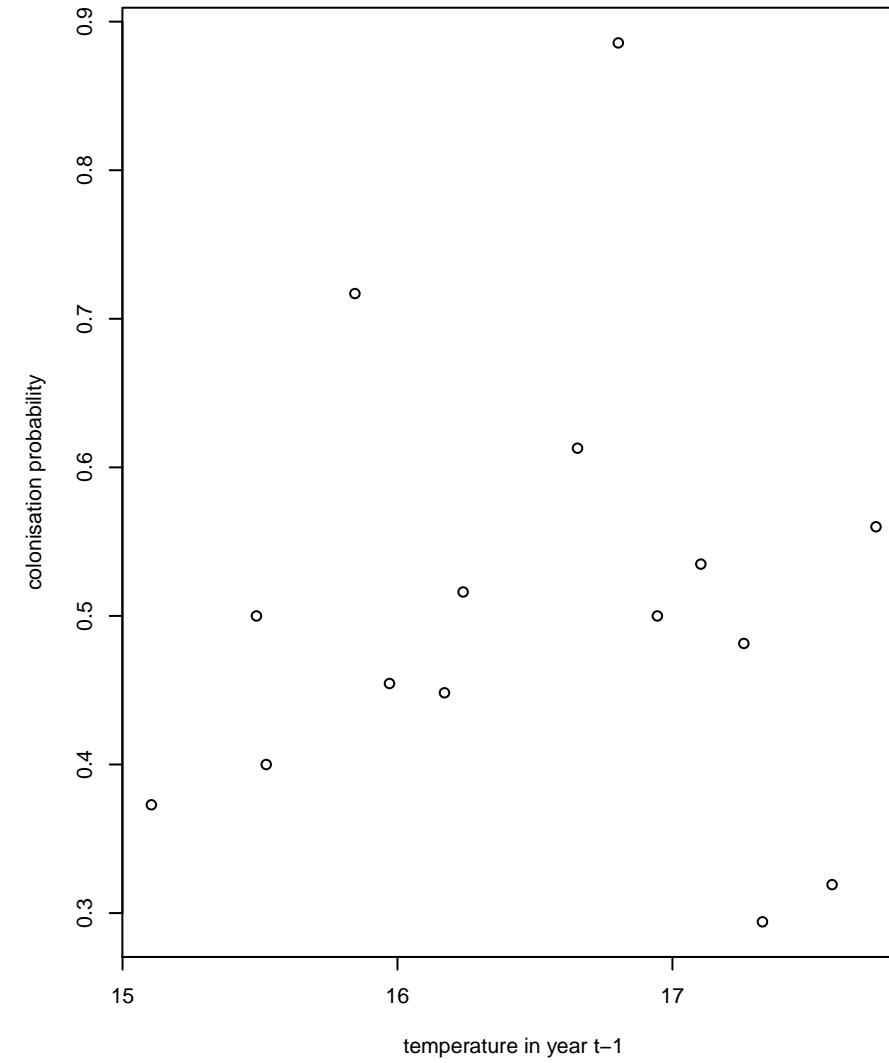

**Oecanthus pellucens**

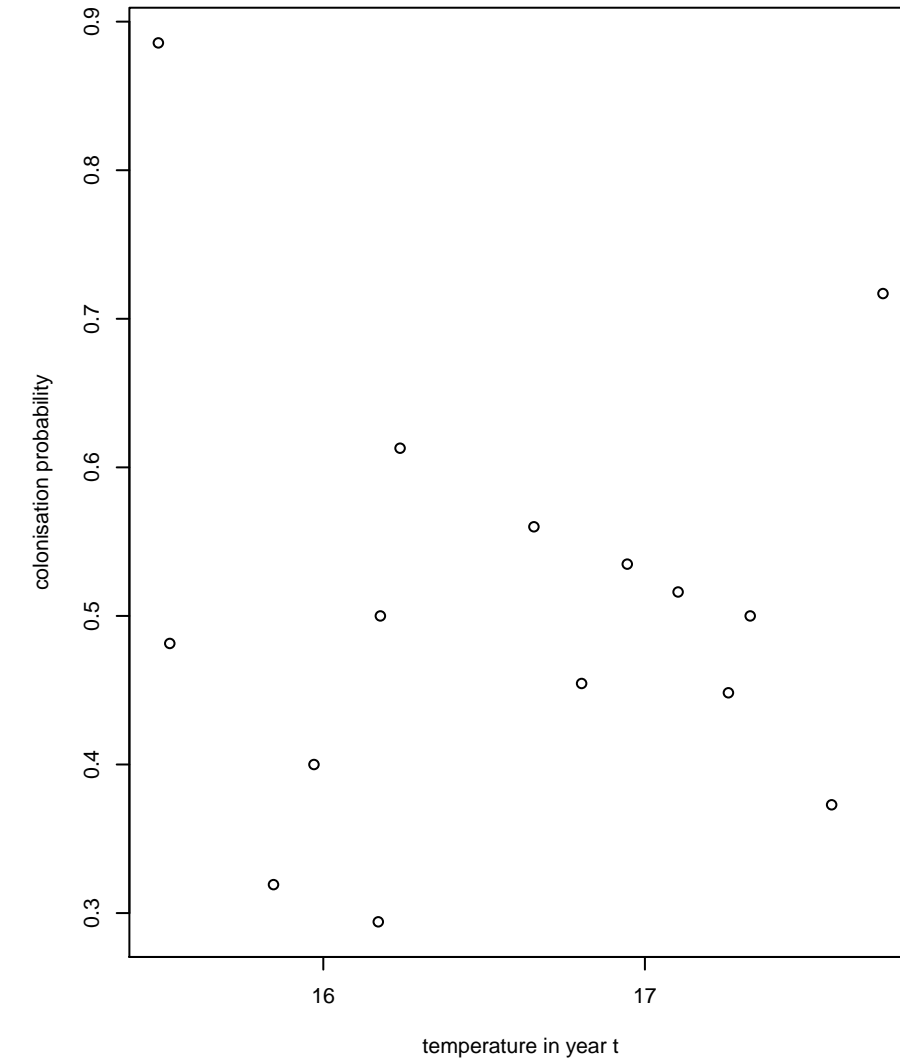

**Oedipoda caerulescens**

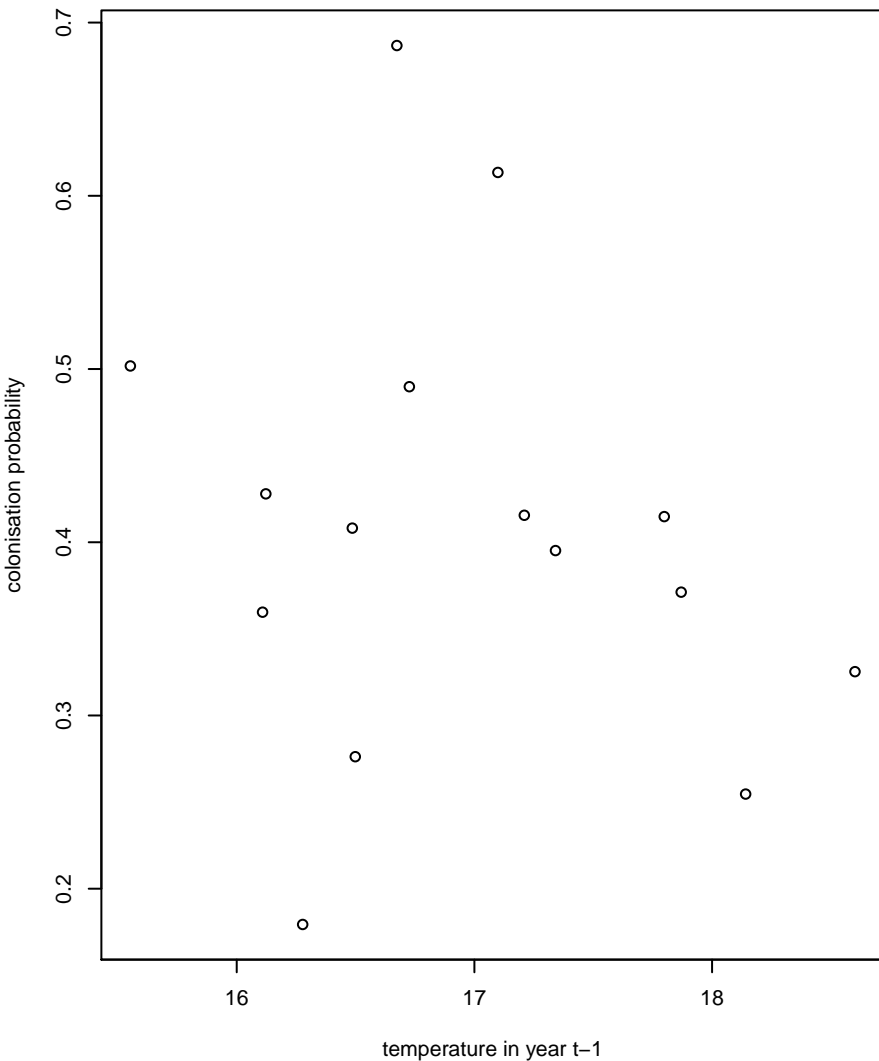

**Oedipoda caerulescens**

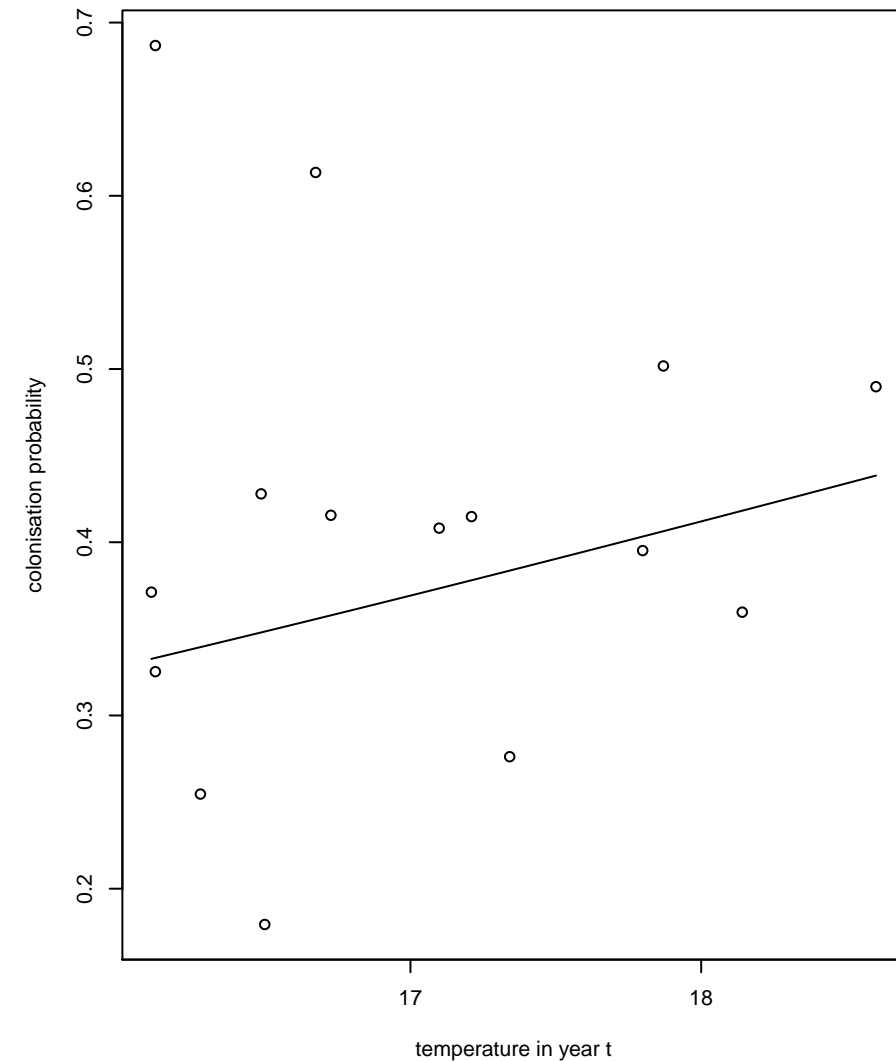

**Omocestus rufipes**

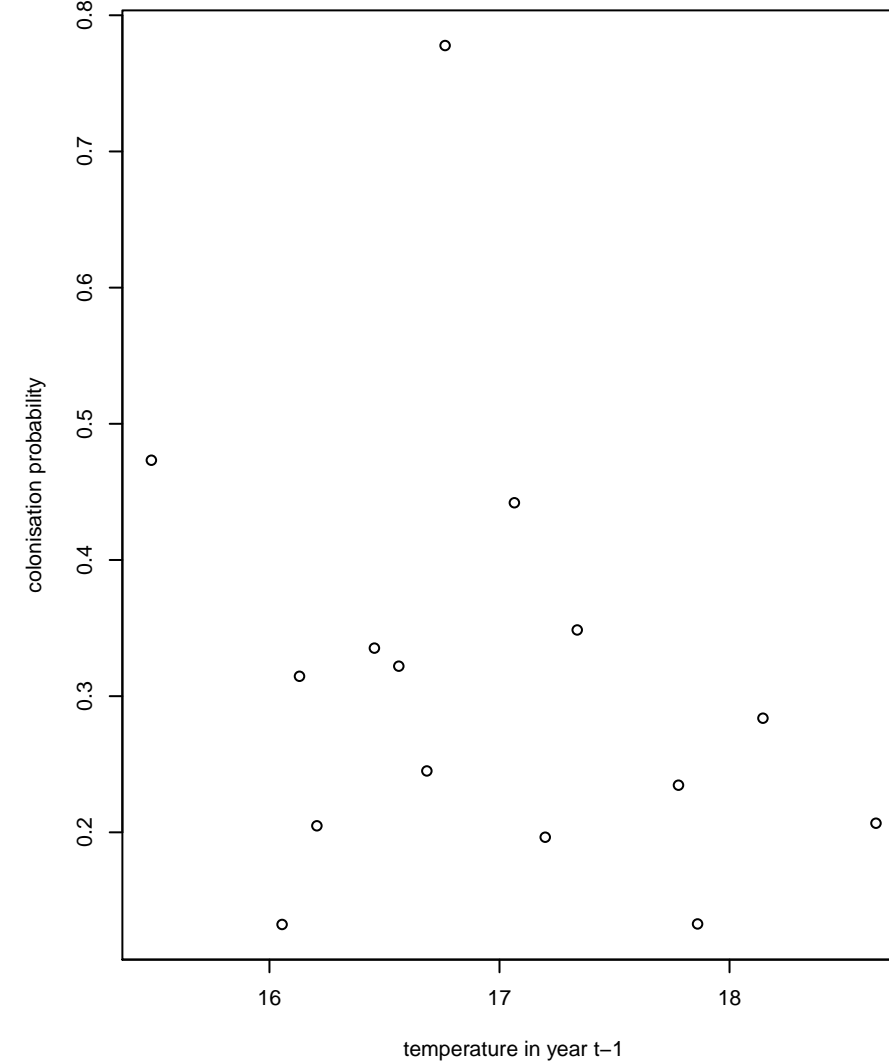

**Omocestus rufipes**

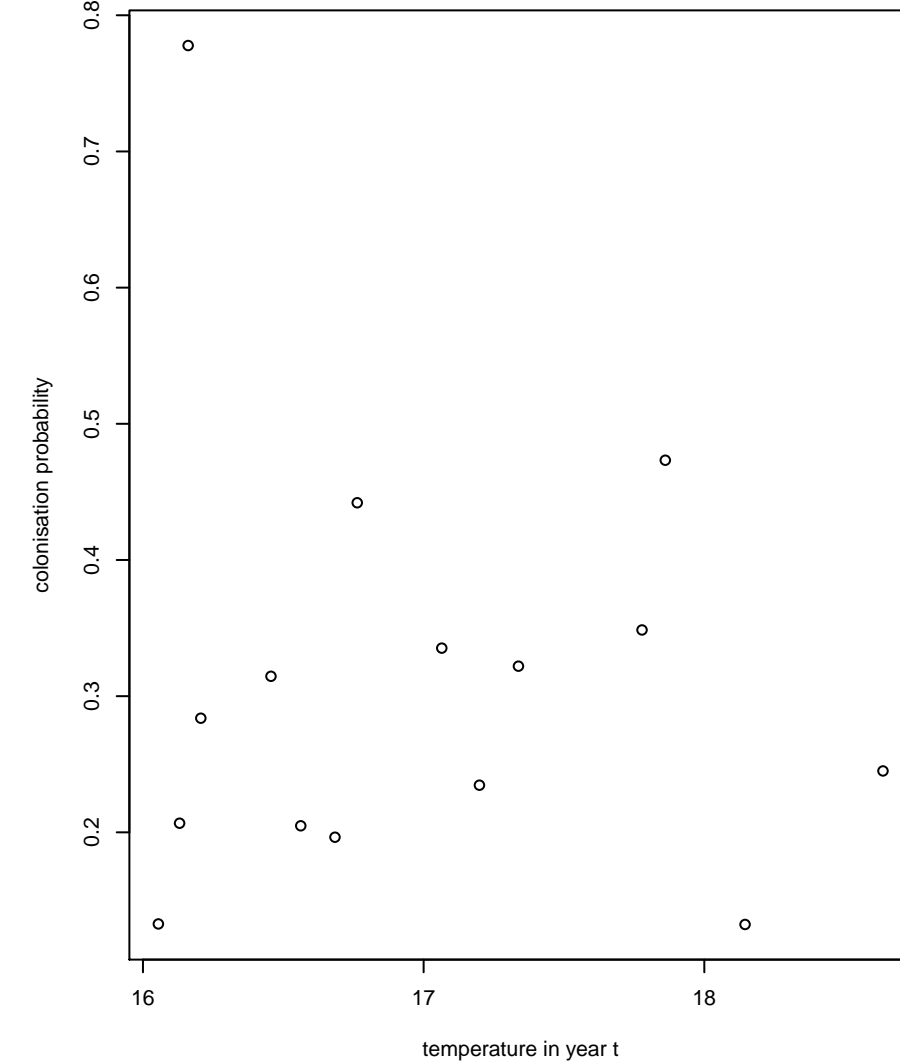



**Omocestus viridulus**

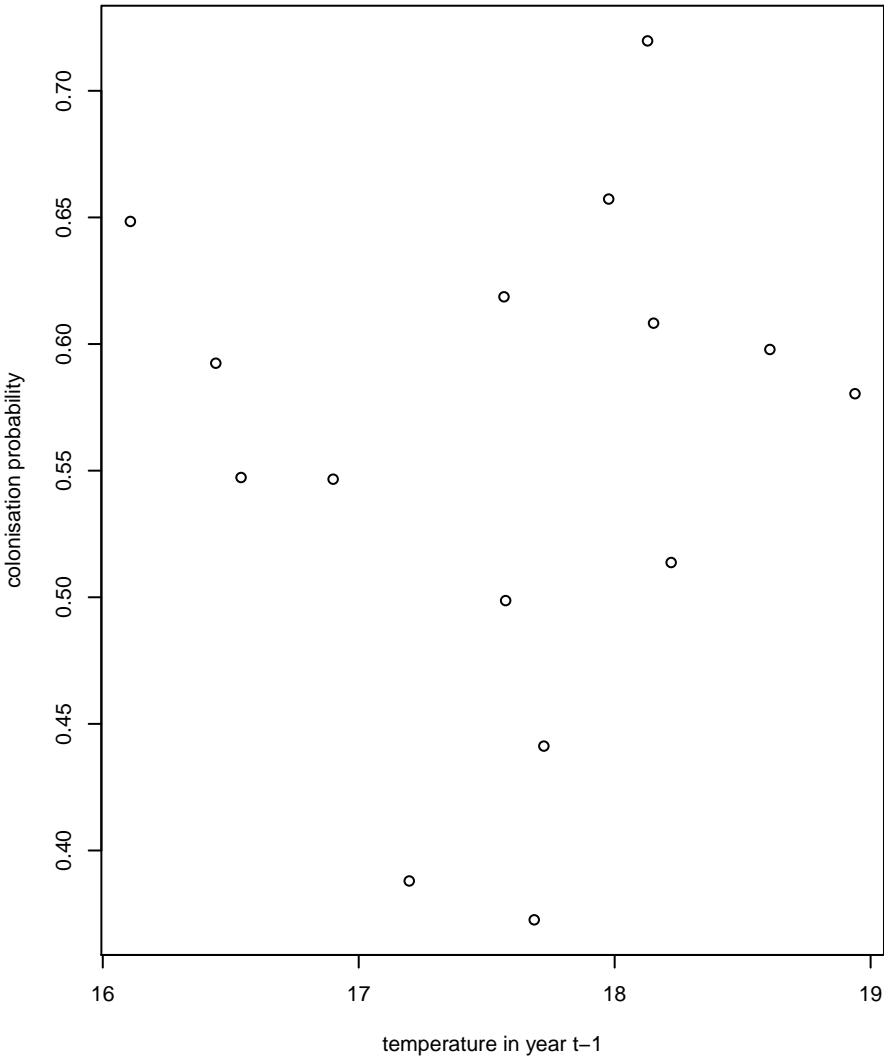

**Omocestus viridulus**

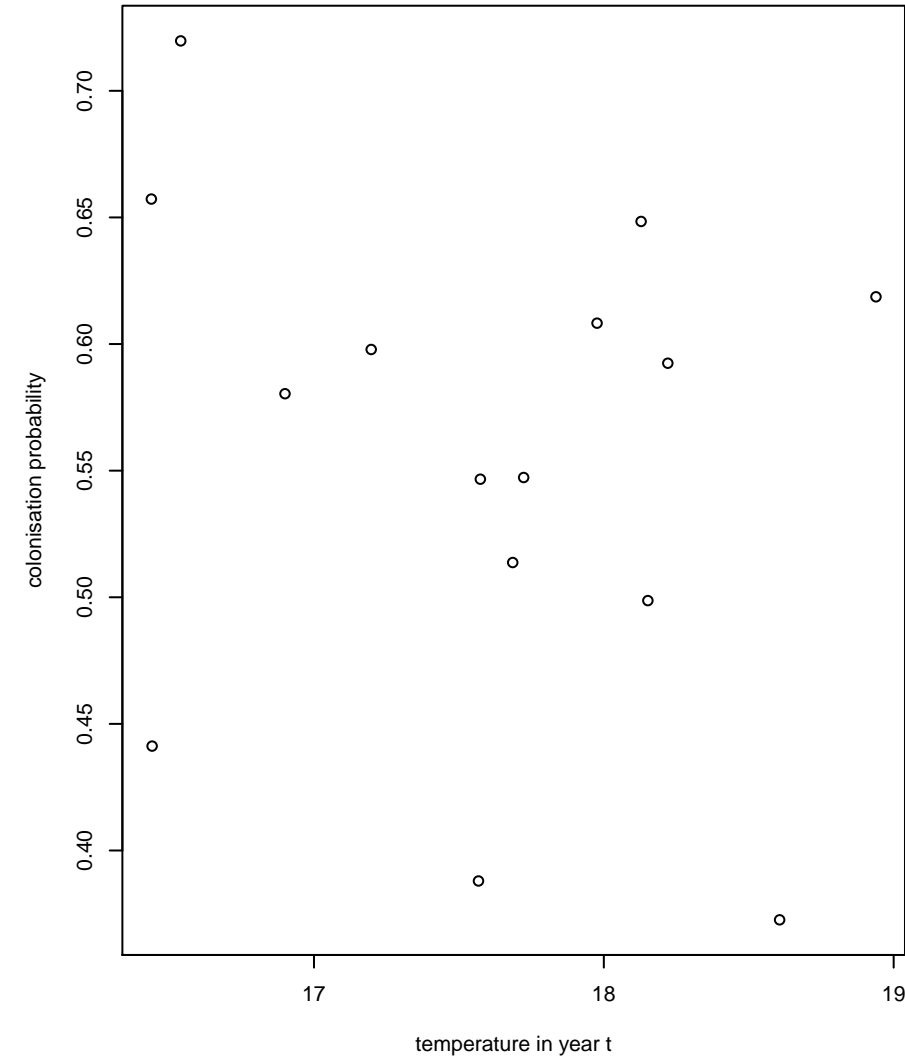

**Phaneroptera falcata**

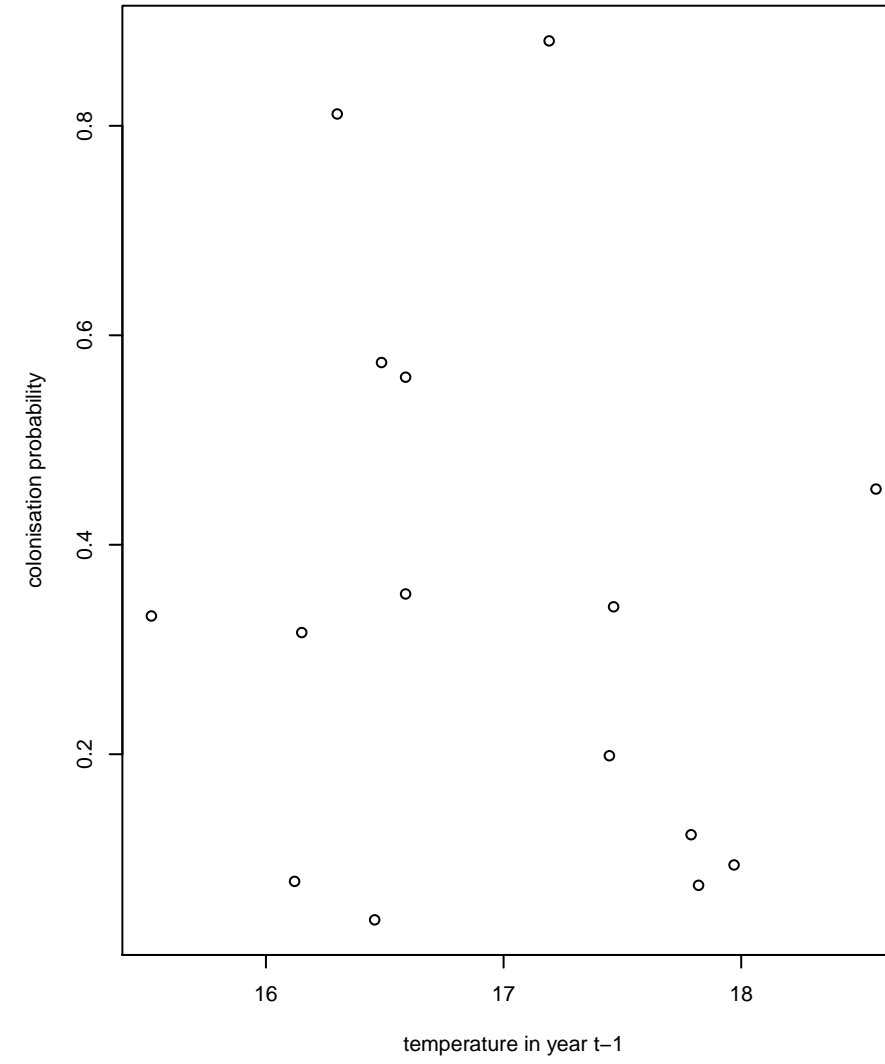

**Phaneroptera falcata**

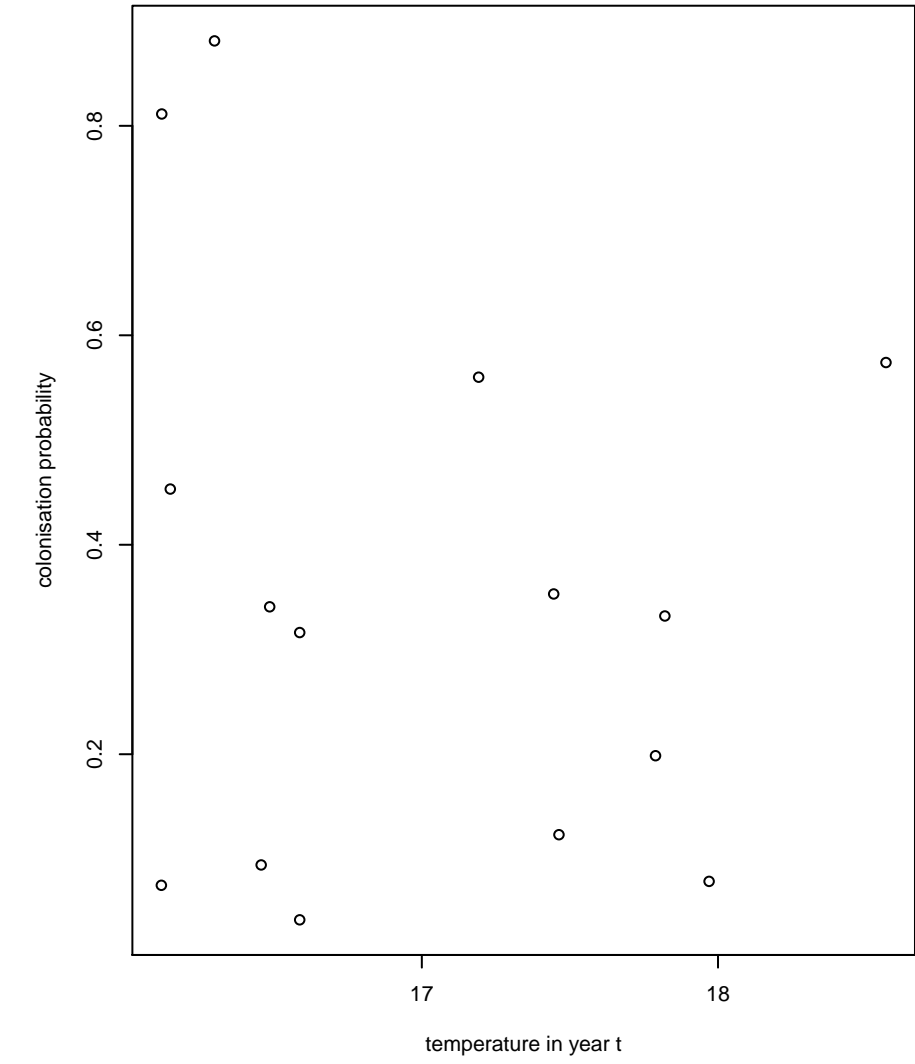

**Pholidoptera griseoptera**

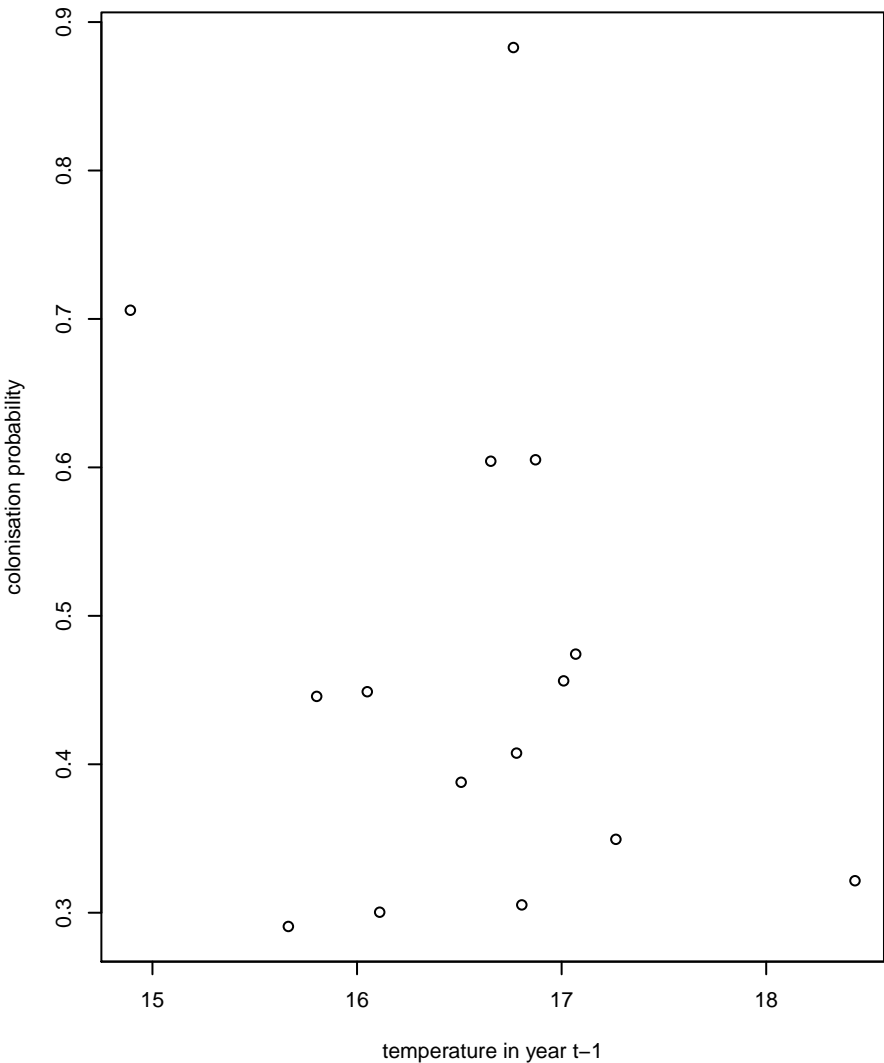

**Pholidoptera griseoptera**

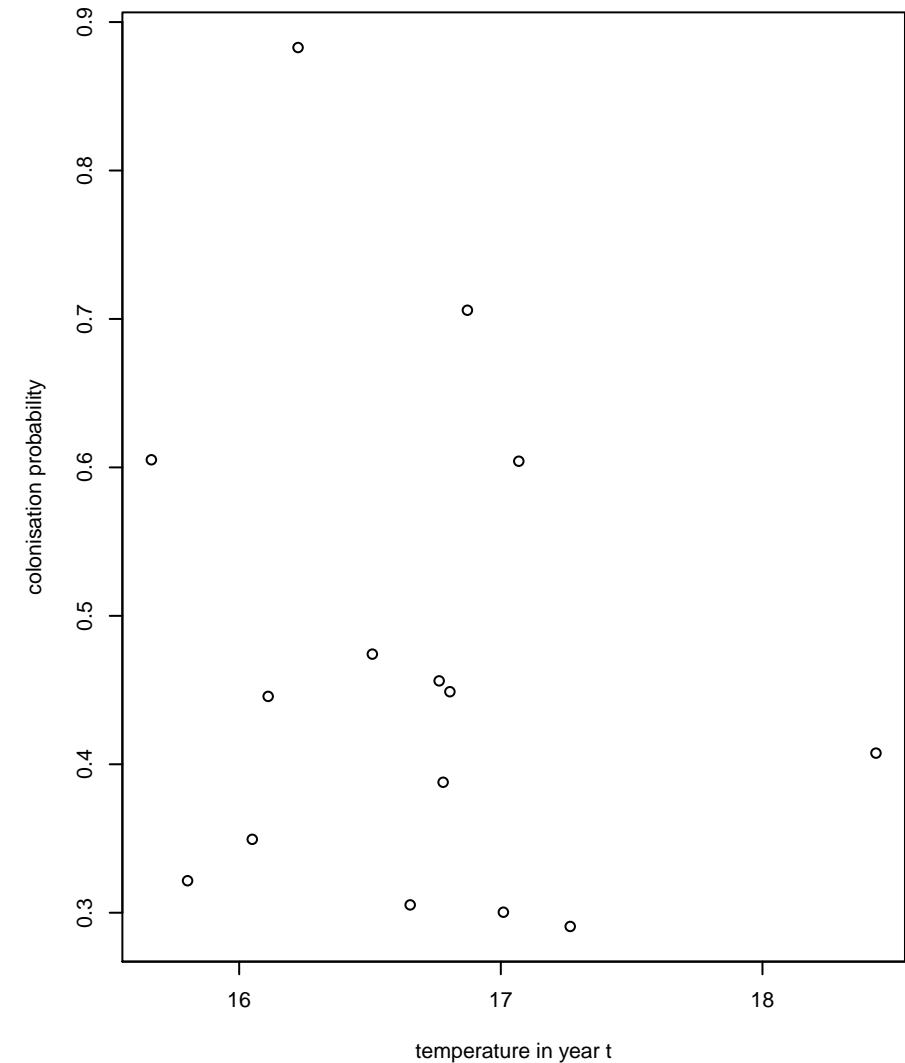

**Platycleis albopunctata**

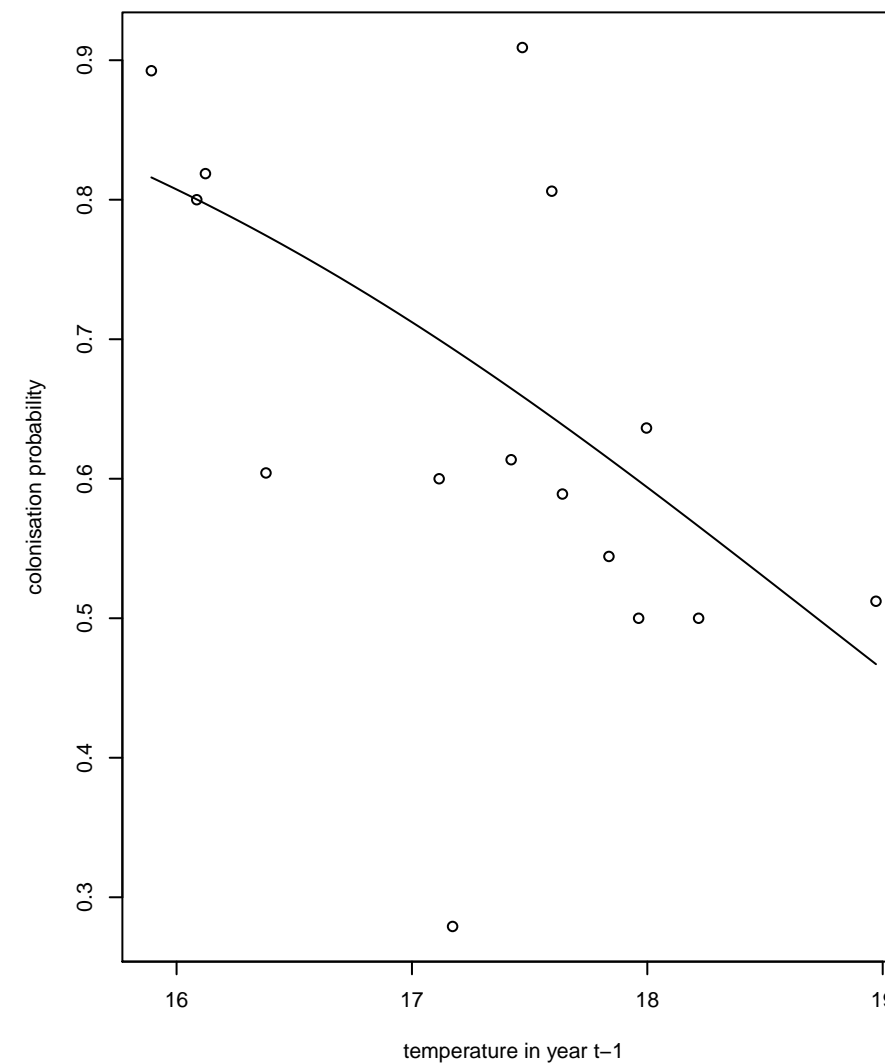

**Platycleis albopunctata**

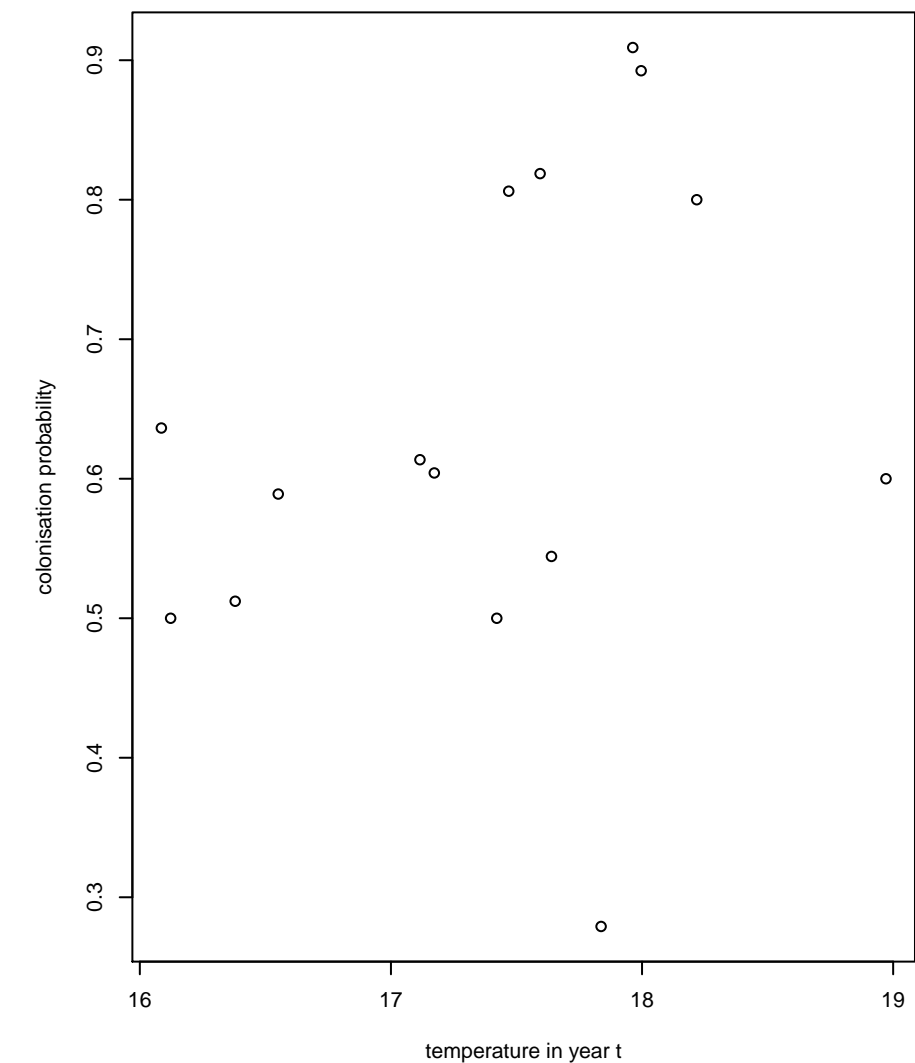

**Stenobothrus lineatus**

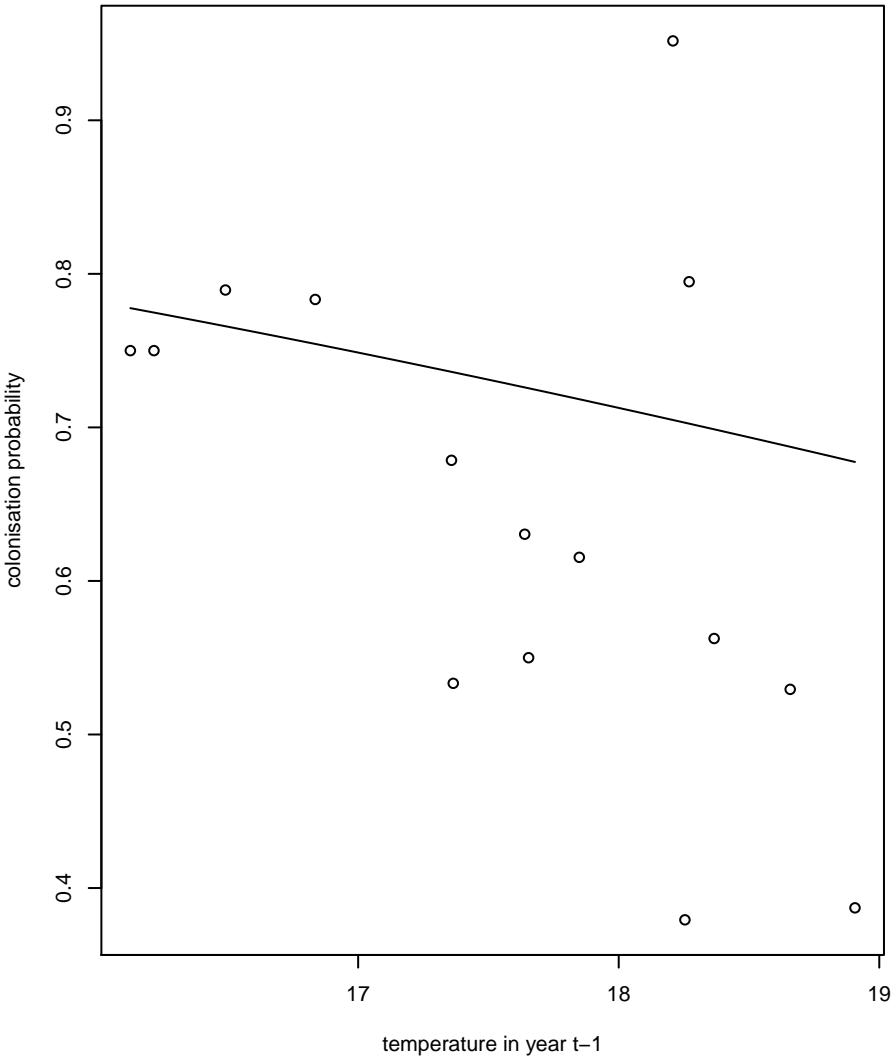

**Stenobothrus lineatus**

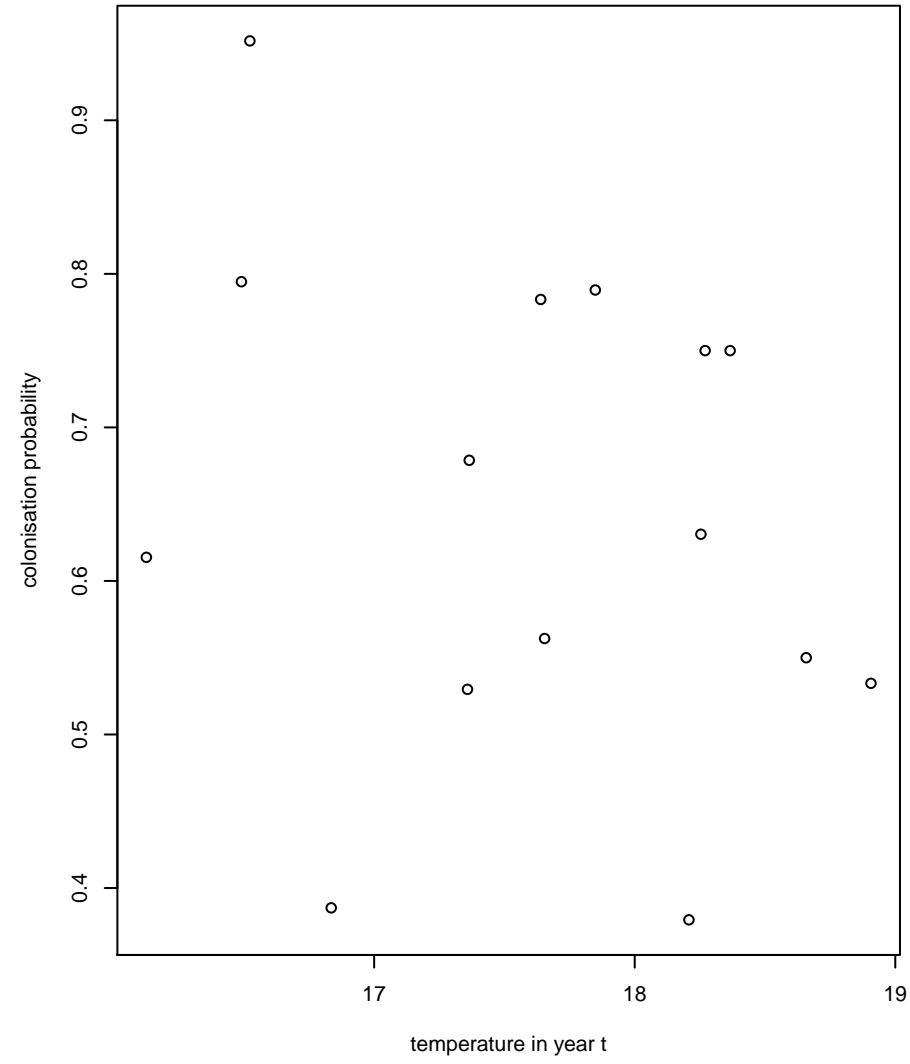

**Stenobothrus stigmaticus**

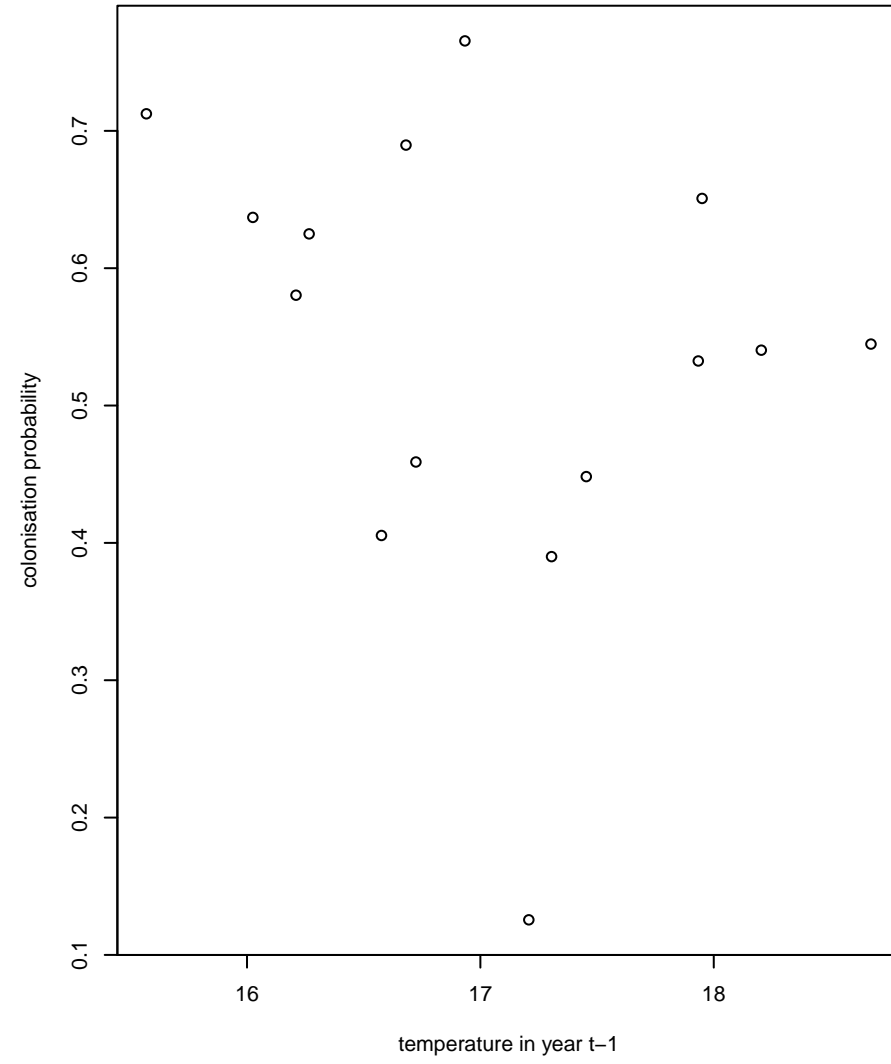

**Stenobothrus stigmaticus**

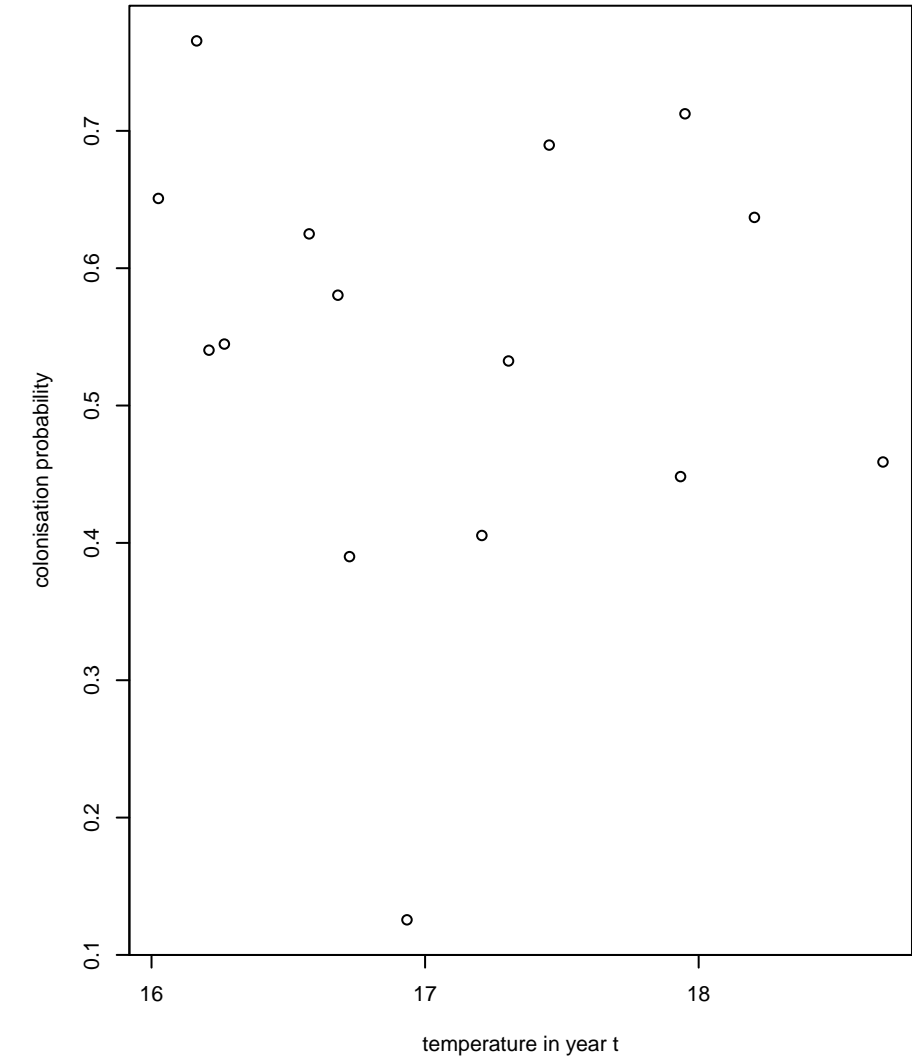

**Stethophyma grossum**

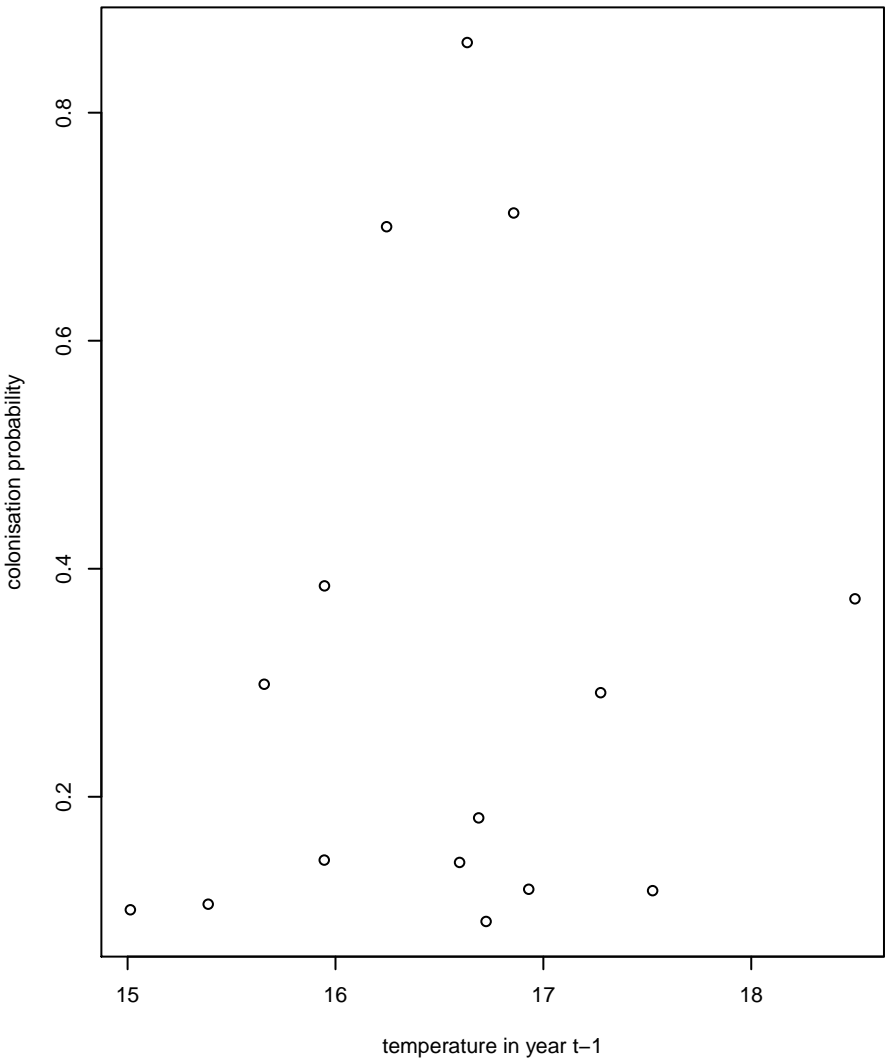

**Stethophyma grossum**

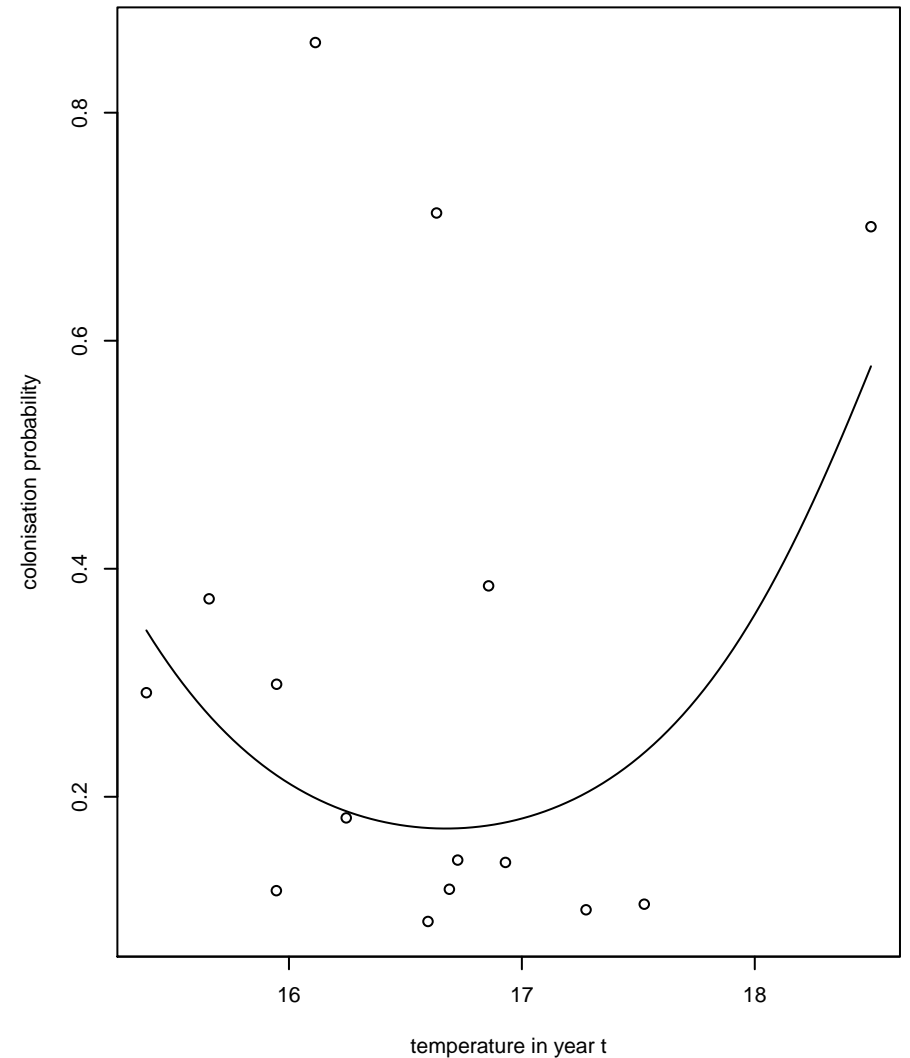

**Tetrix ceperoi**

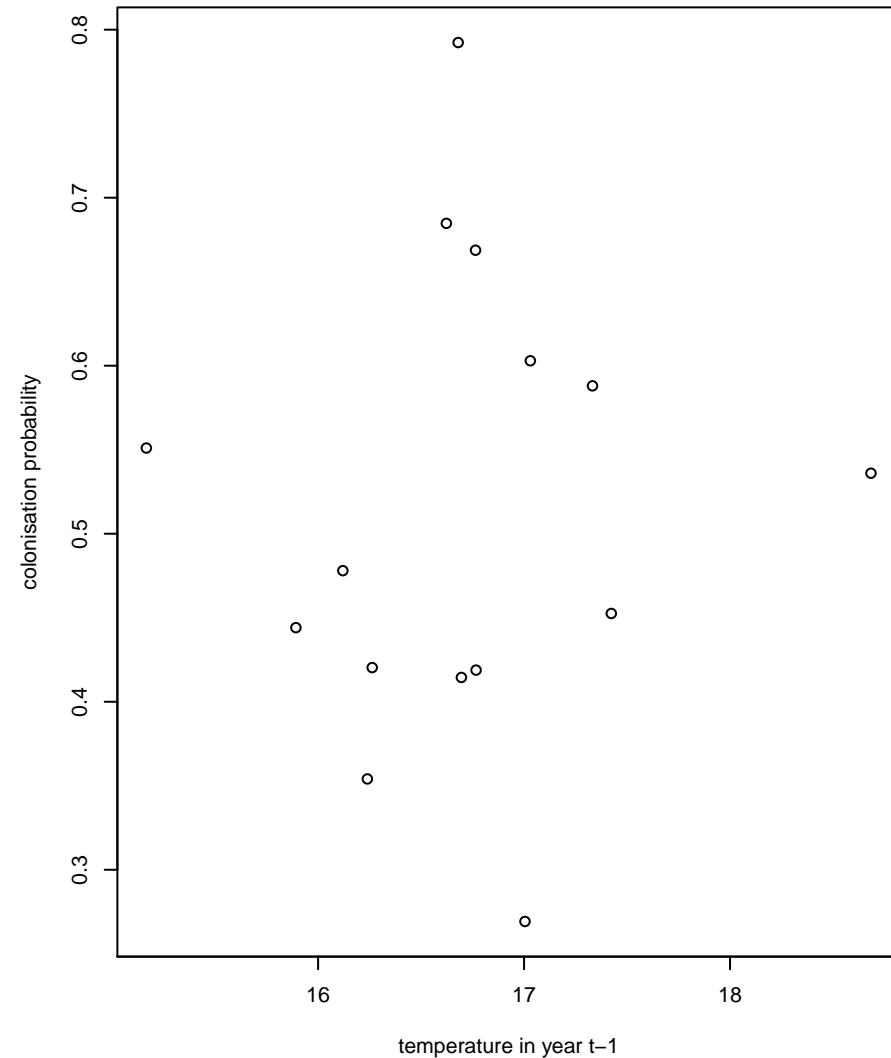

**Tetrix ceperoi**

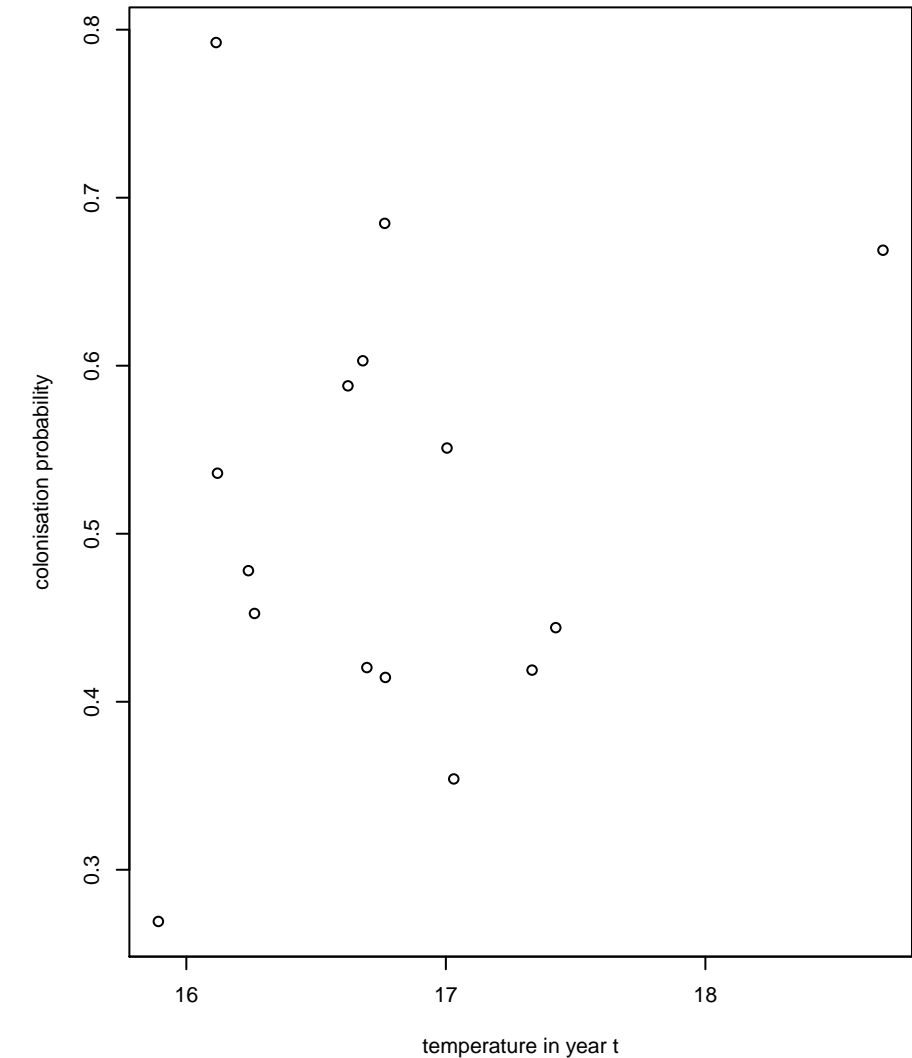

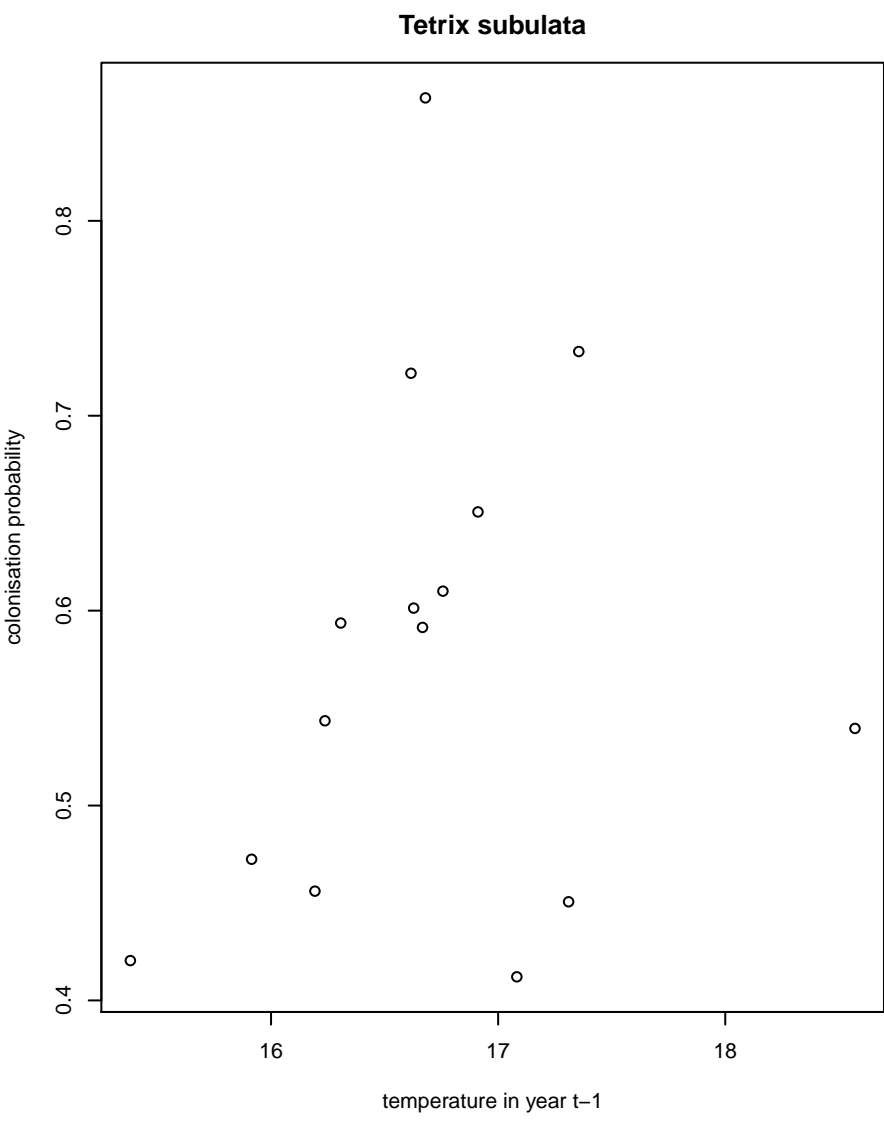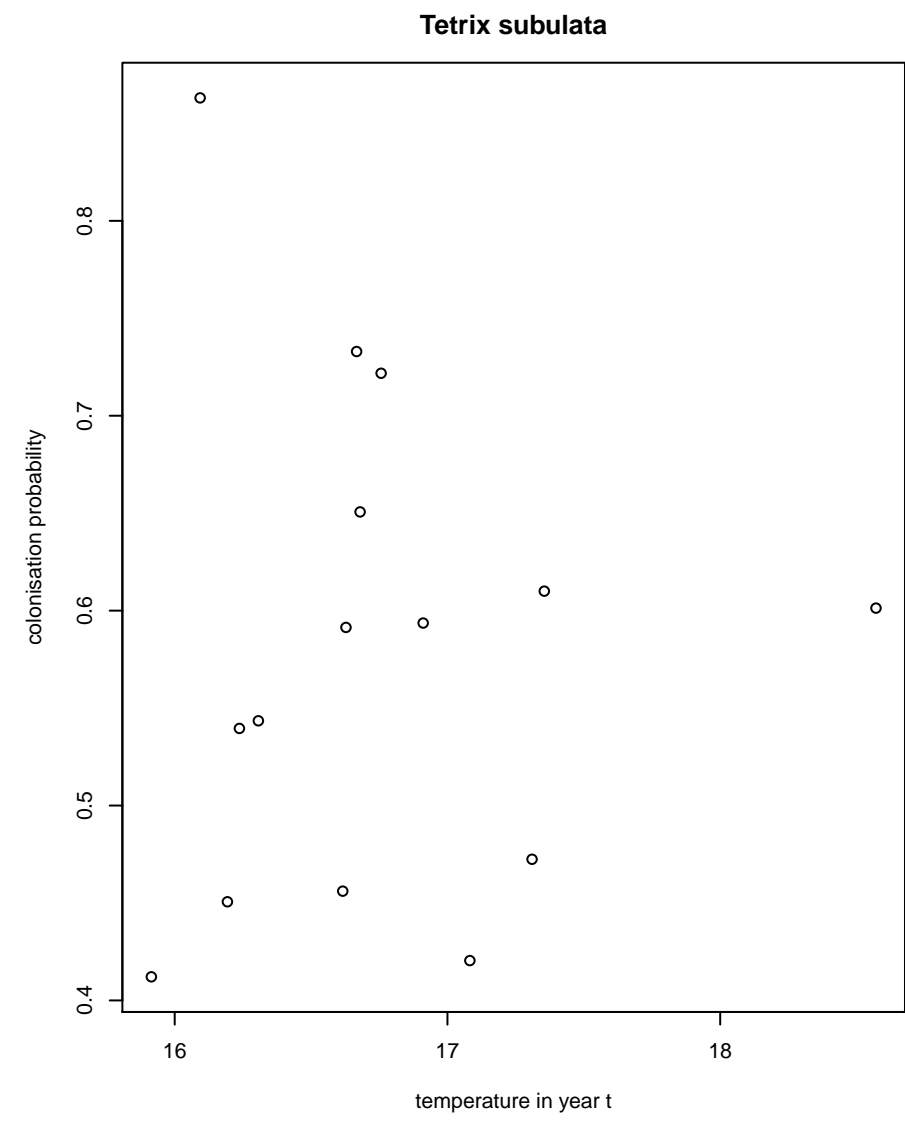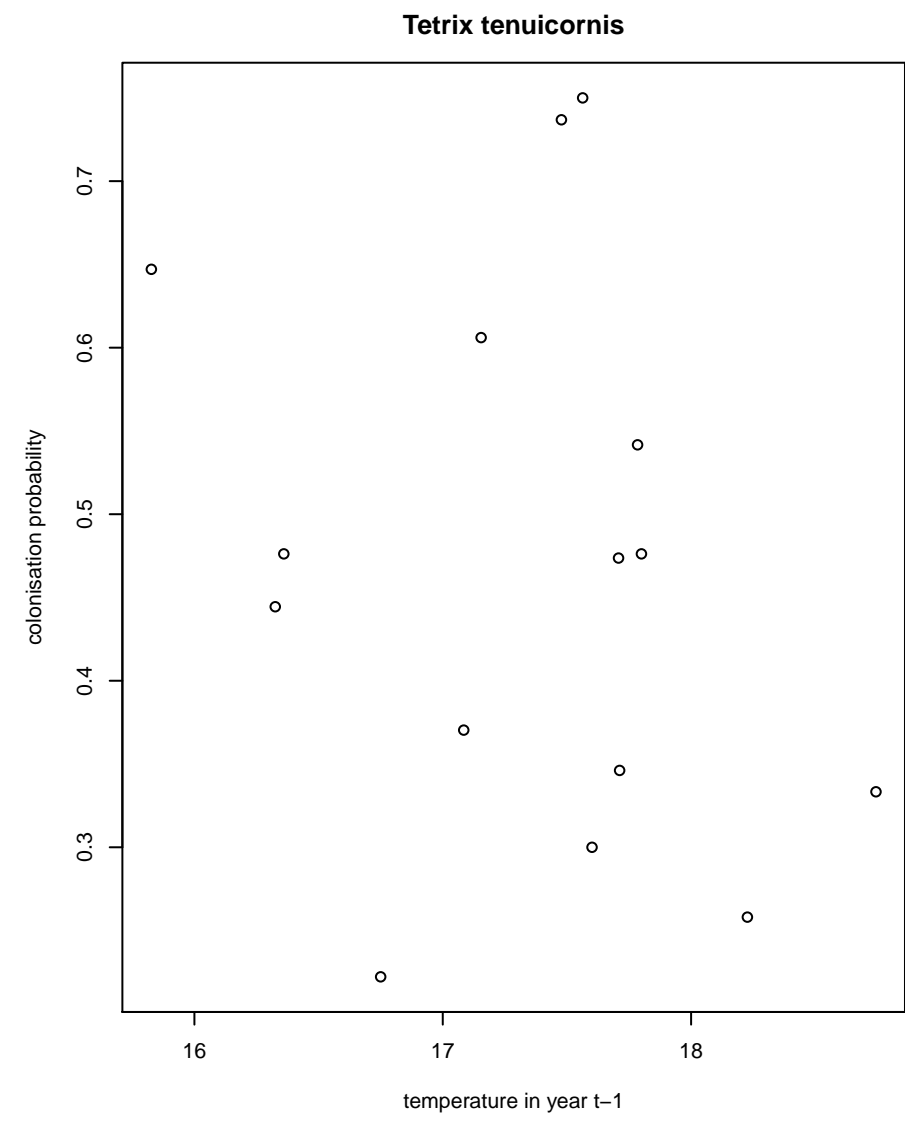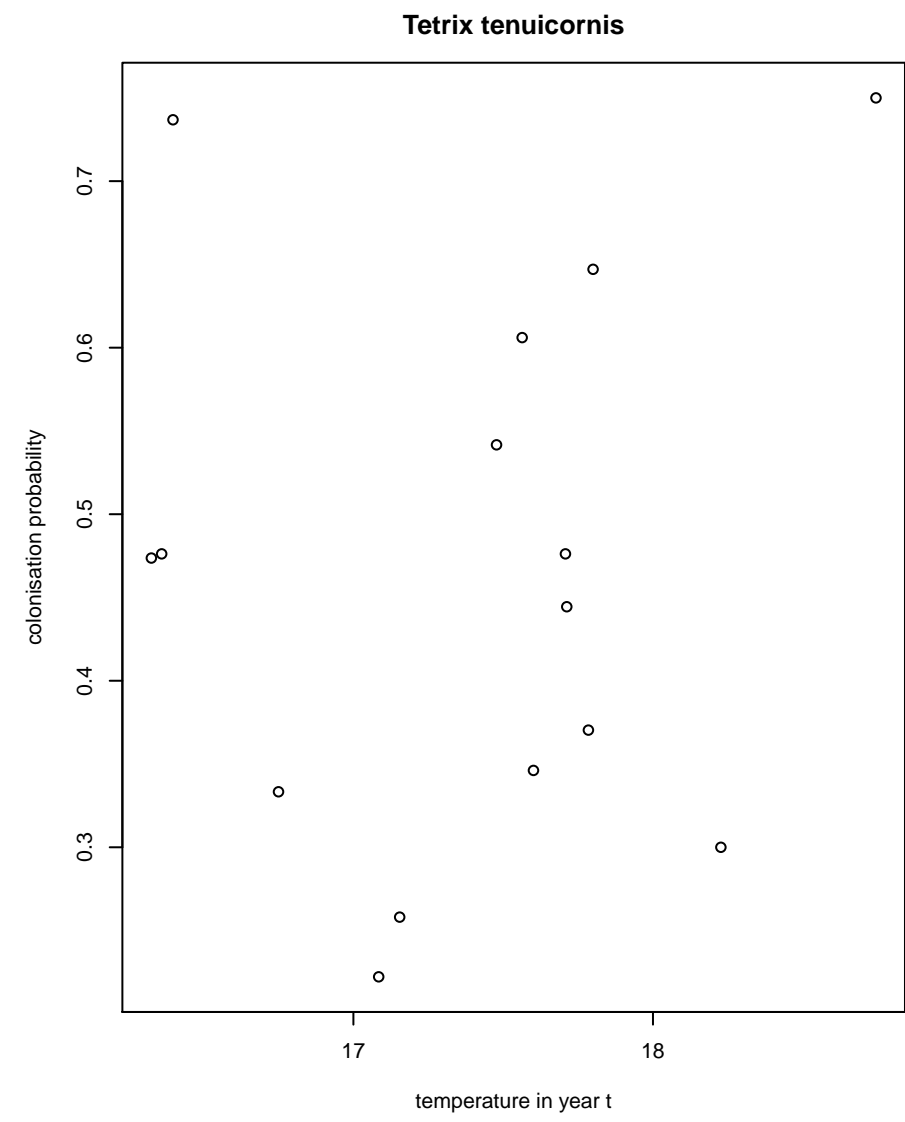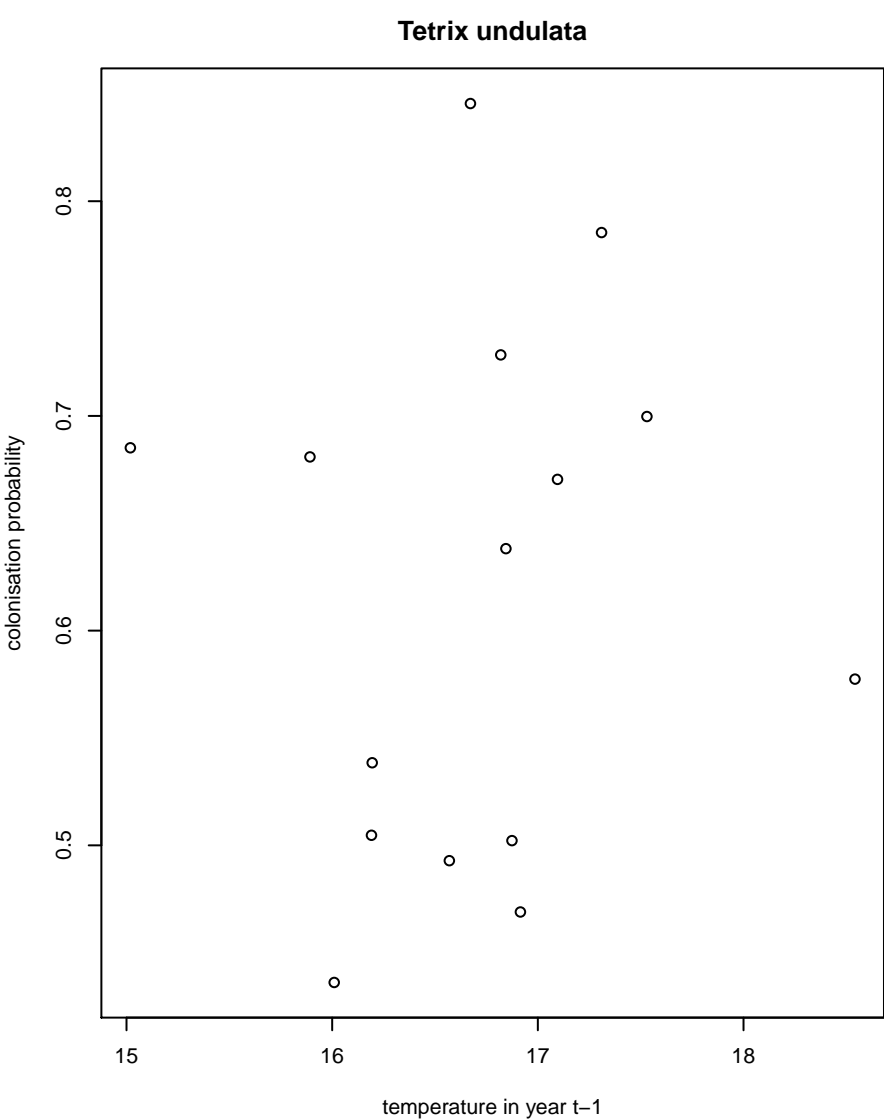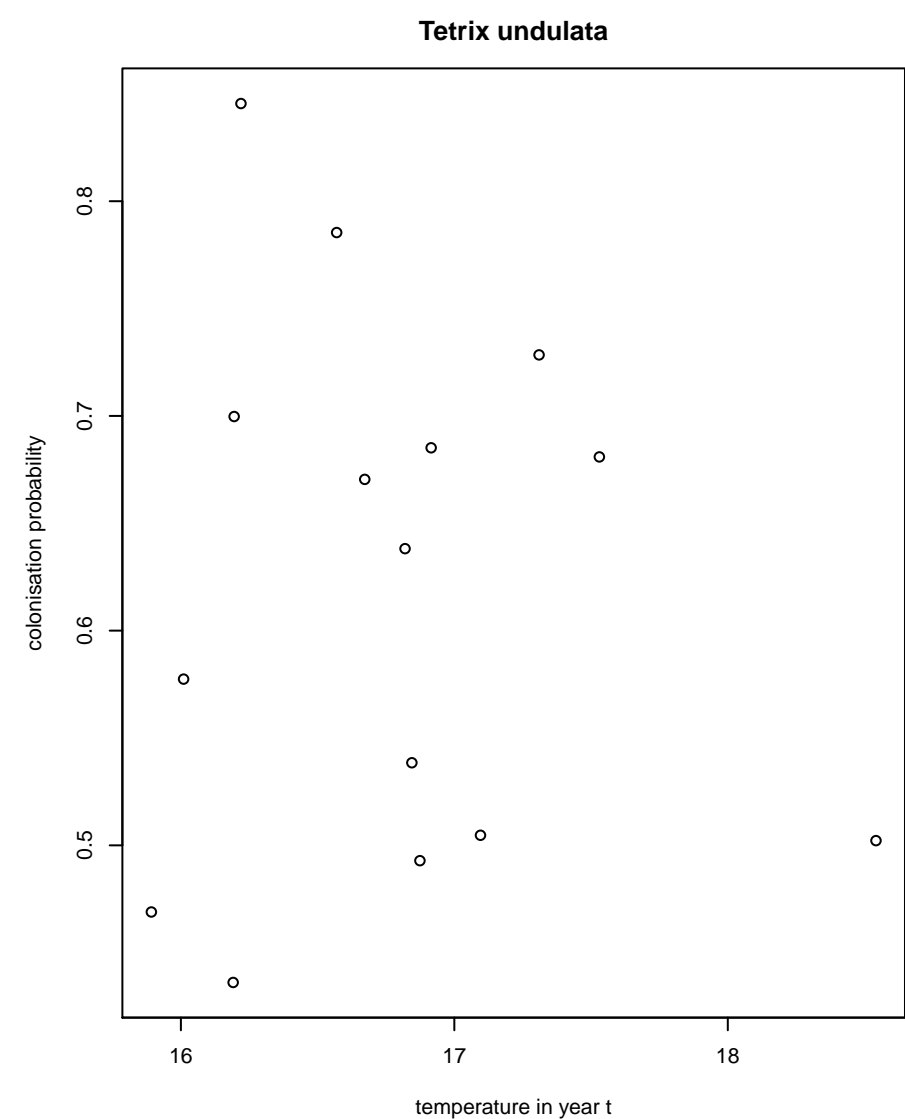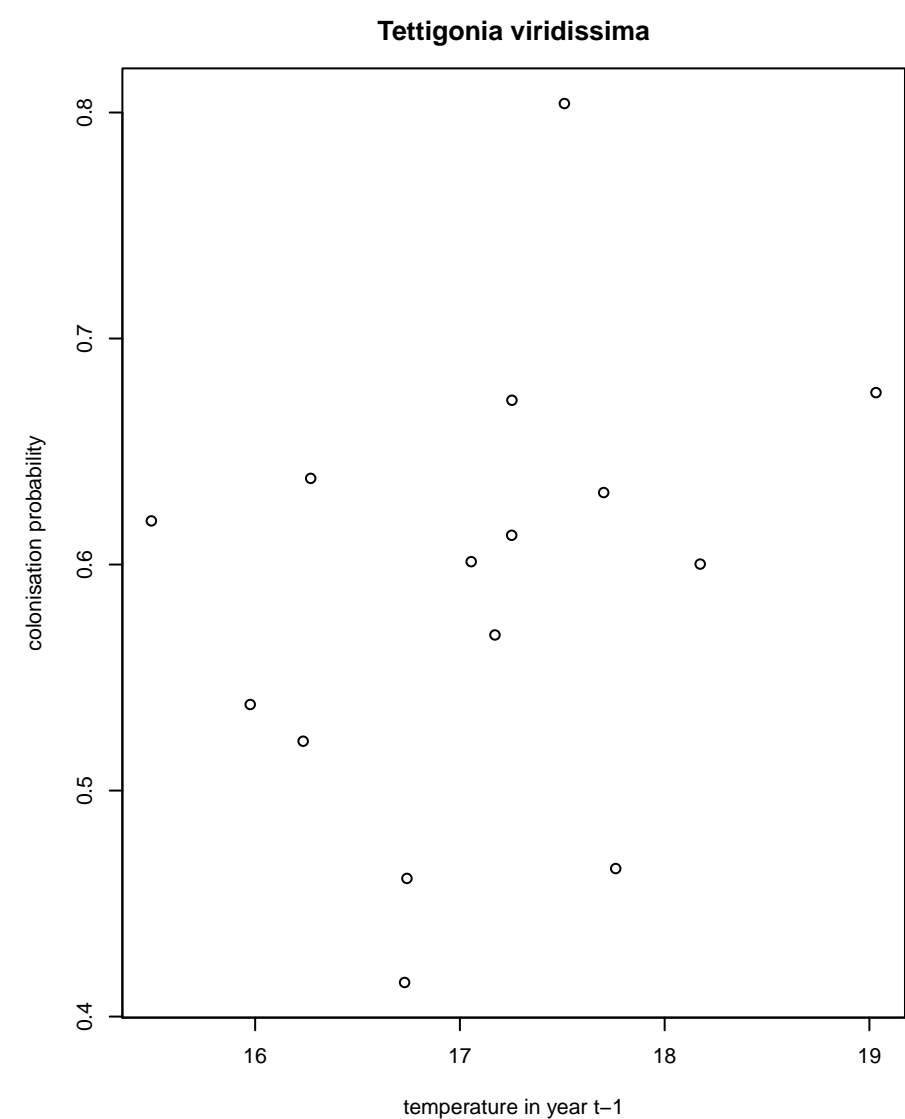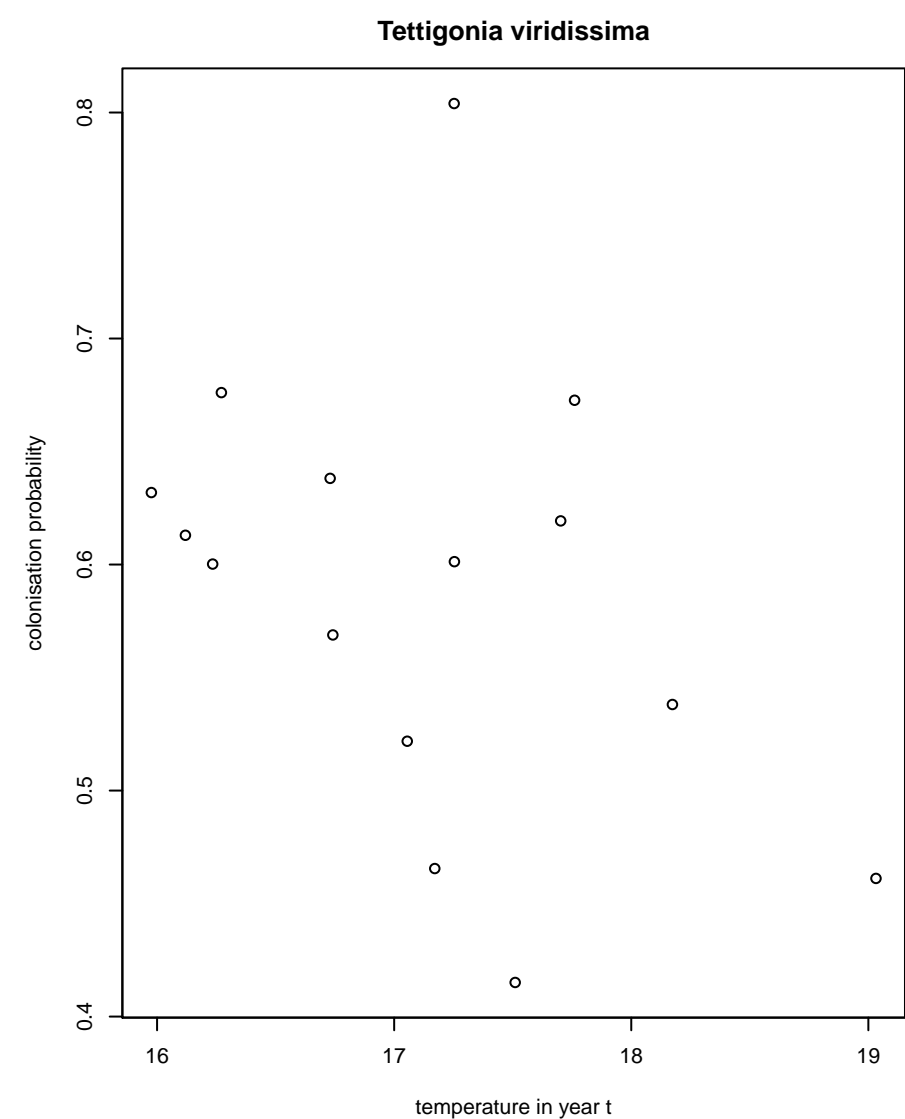

**Coenagrion puella**

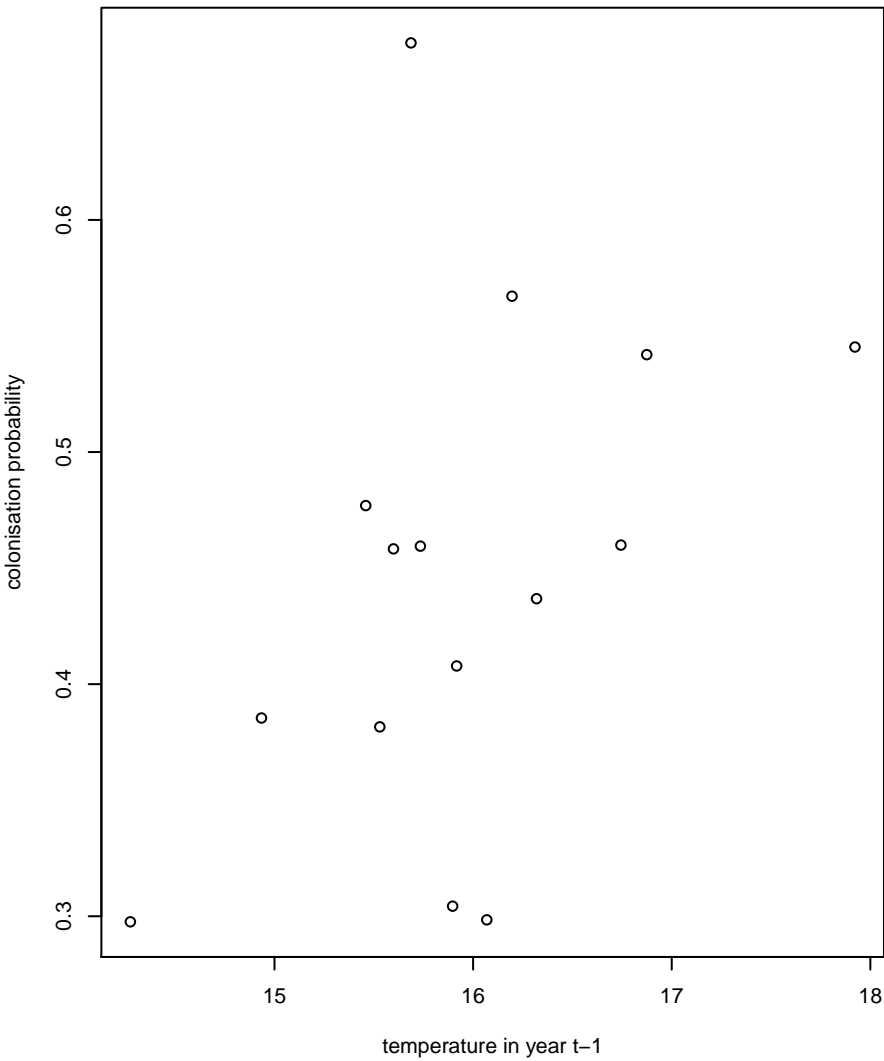

**Coenagrion puella**

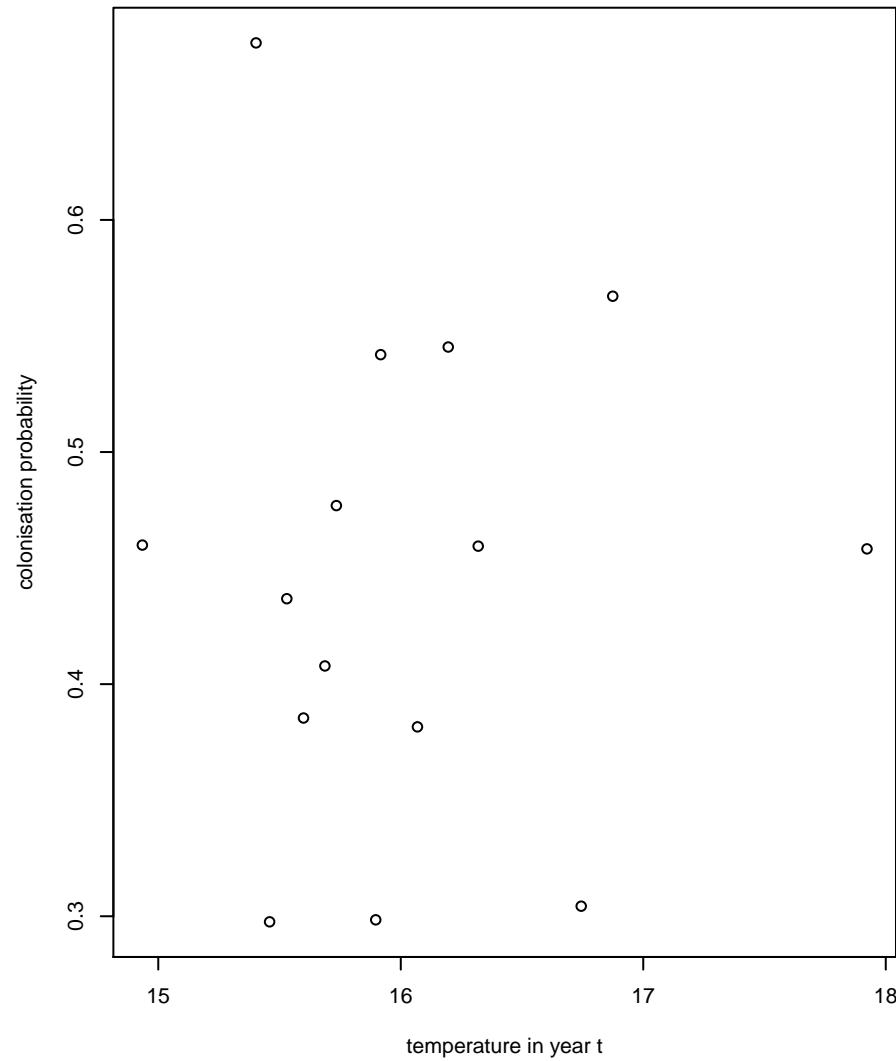

**Erythromma najas**

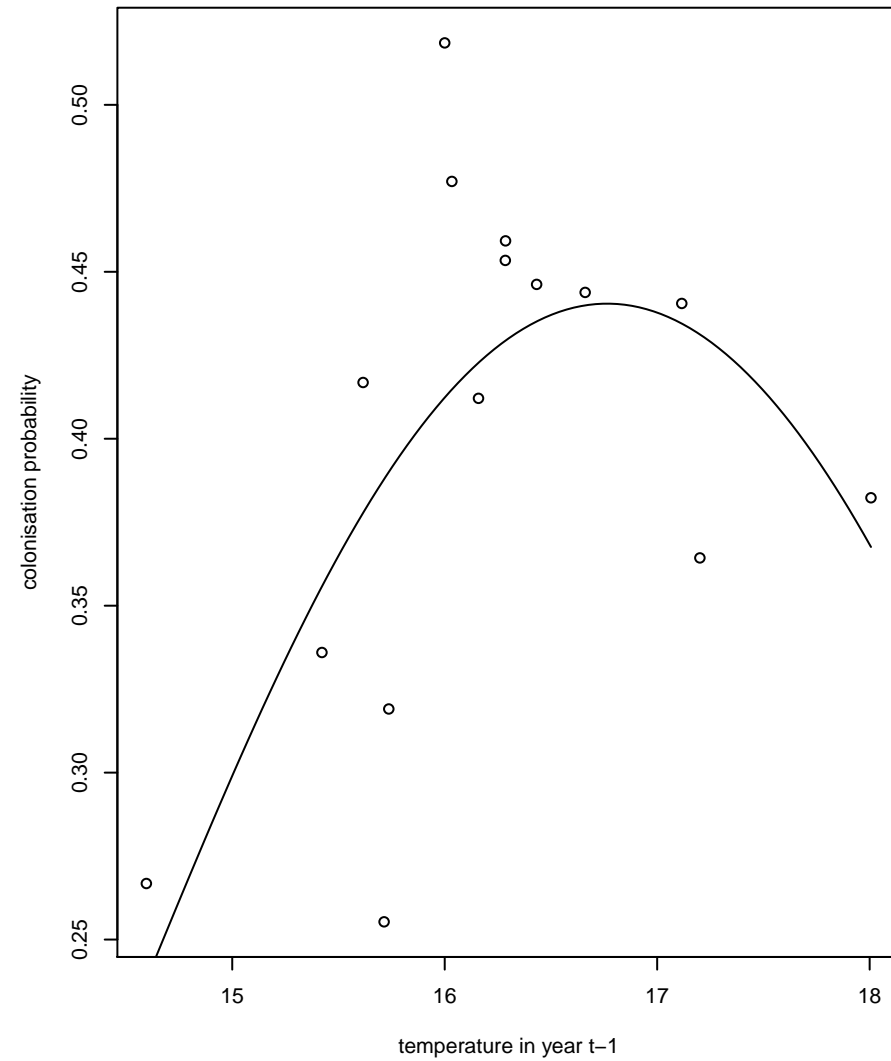

**Erythromma najas**

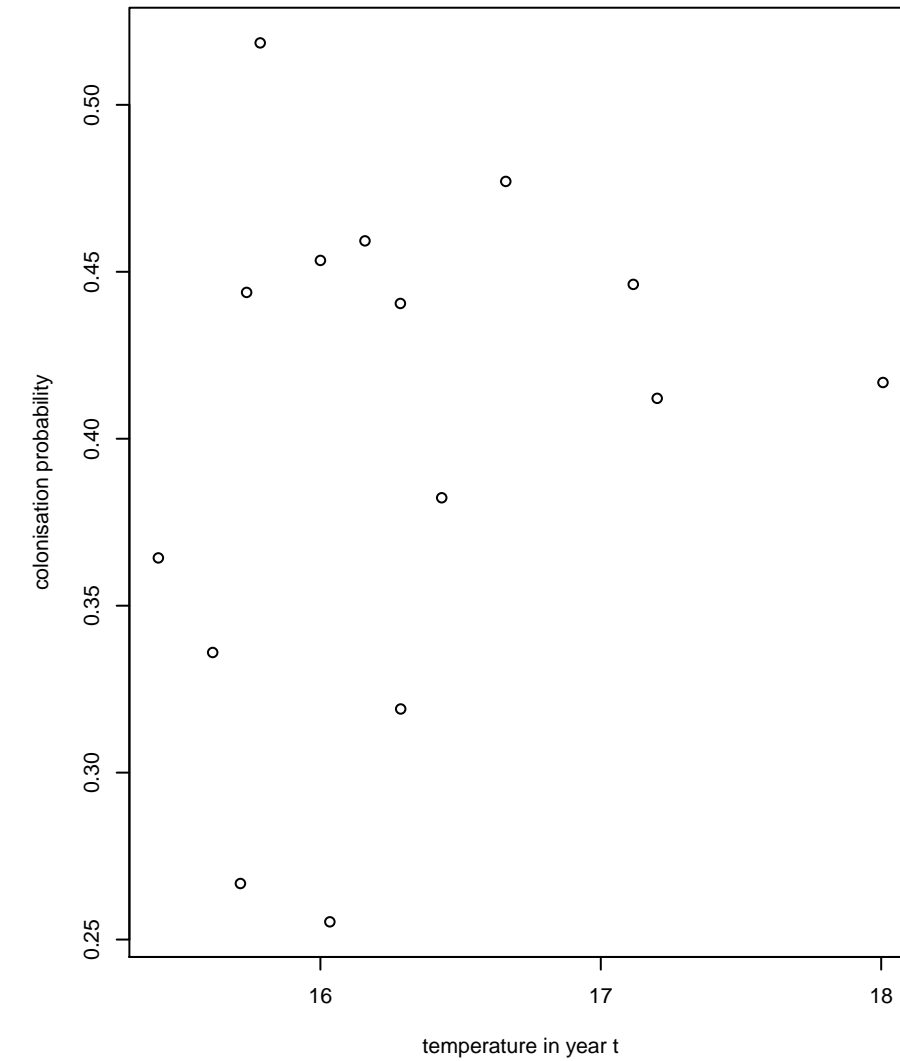

**Brachytron pratense**

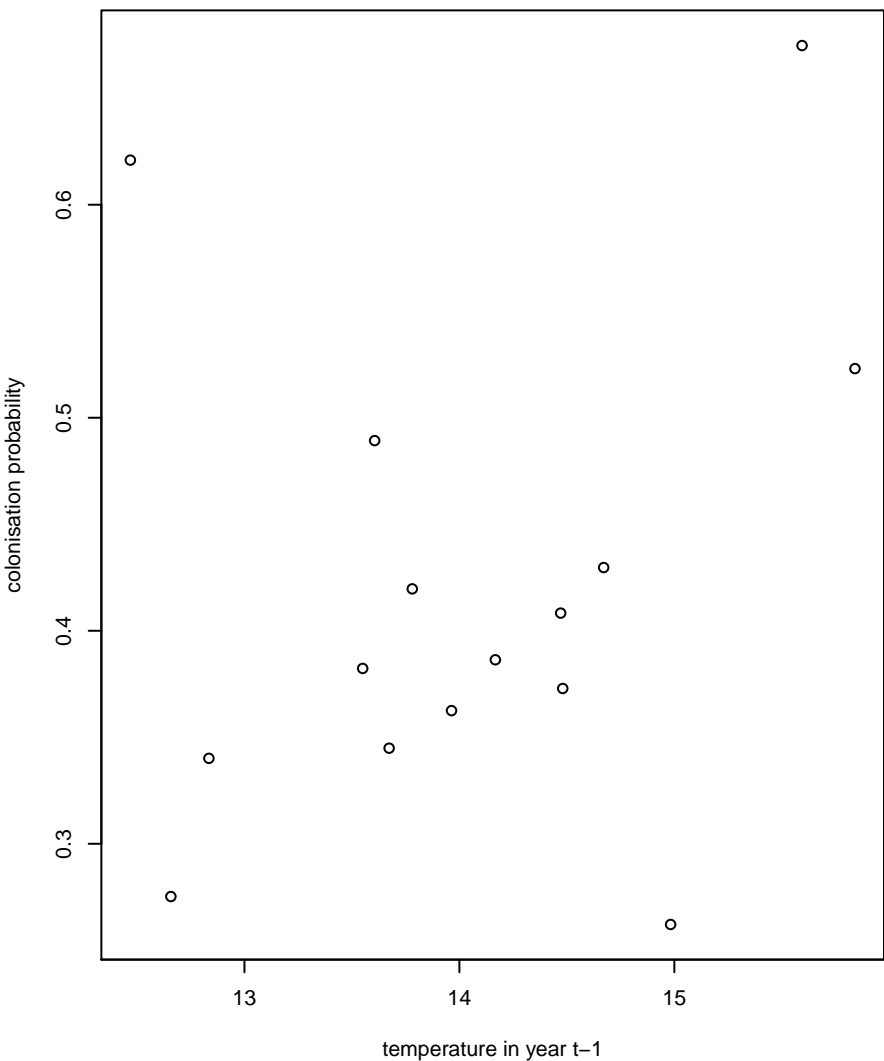

**Brachytron pratense**

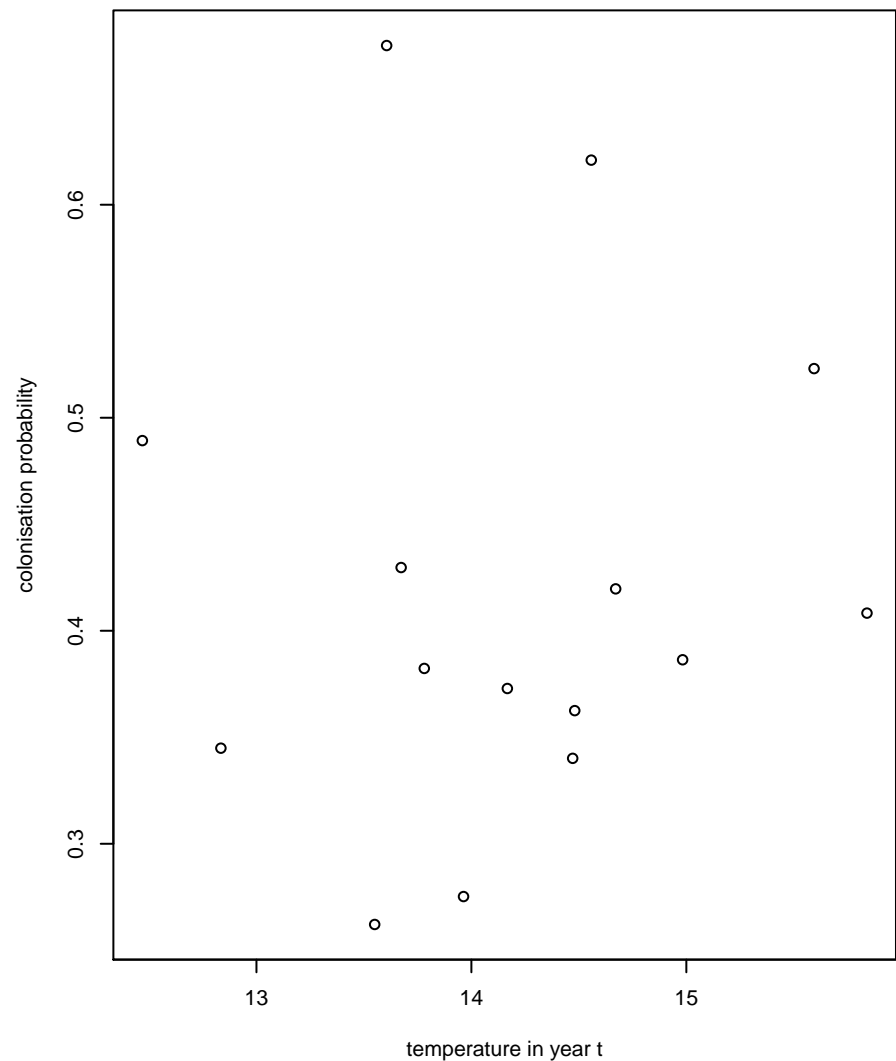

**Pyrrhosoma nymphula**

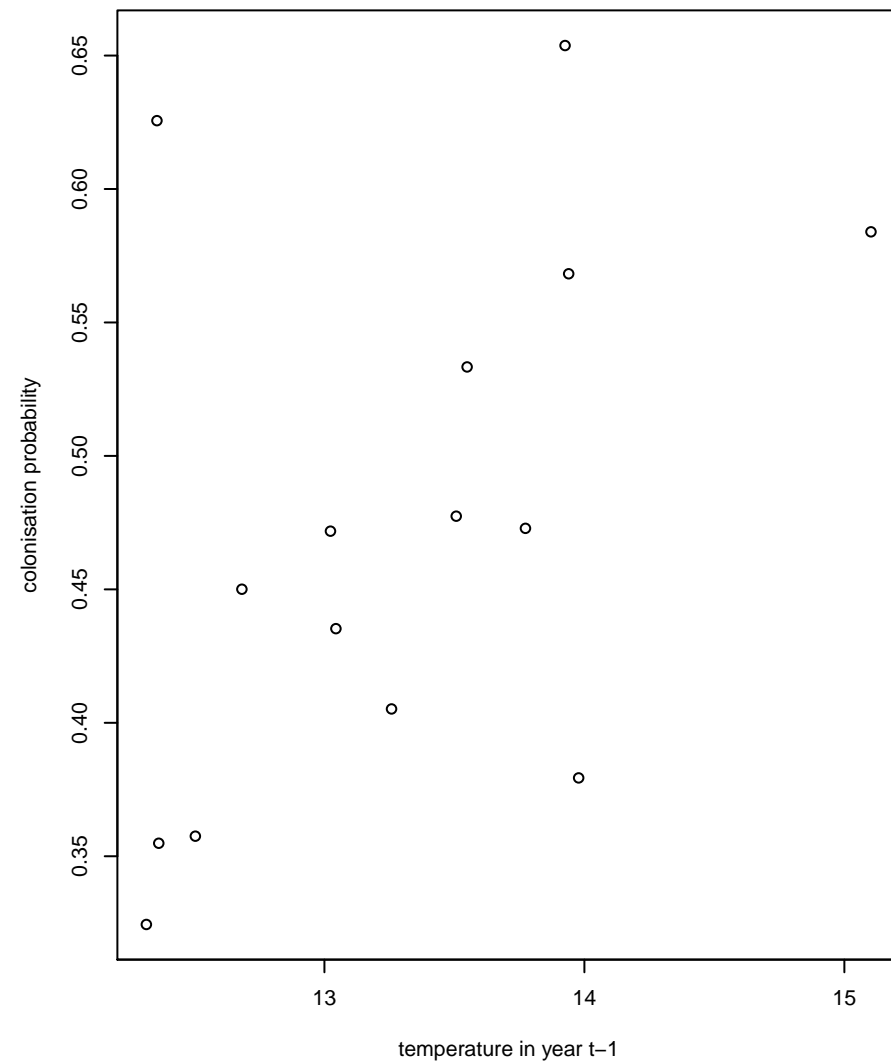

**Pyrrhosoma nymphula**

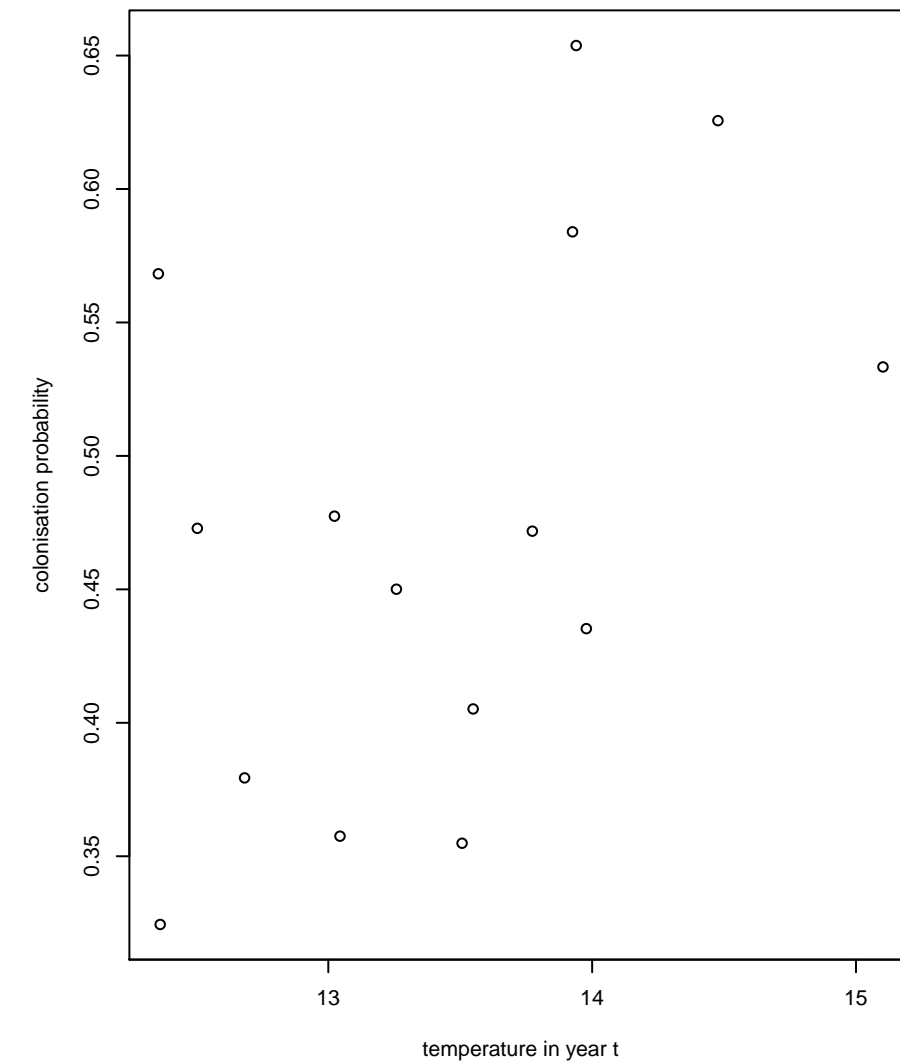

**Coenagrion pulchellum**

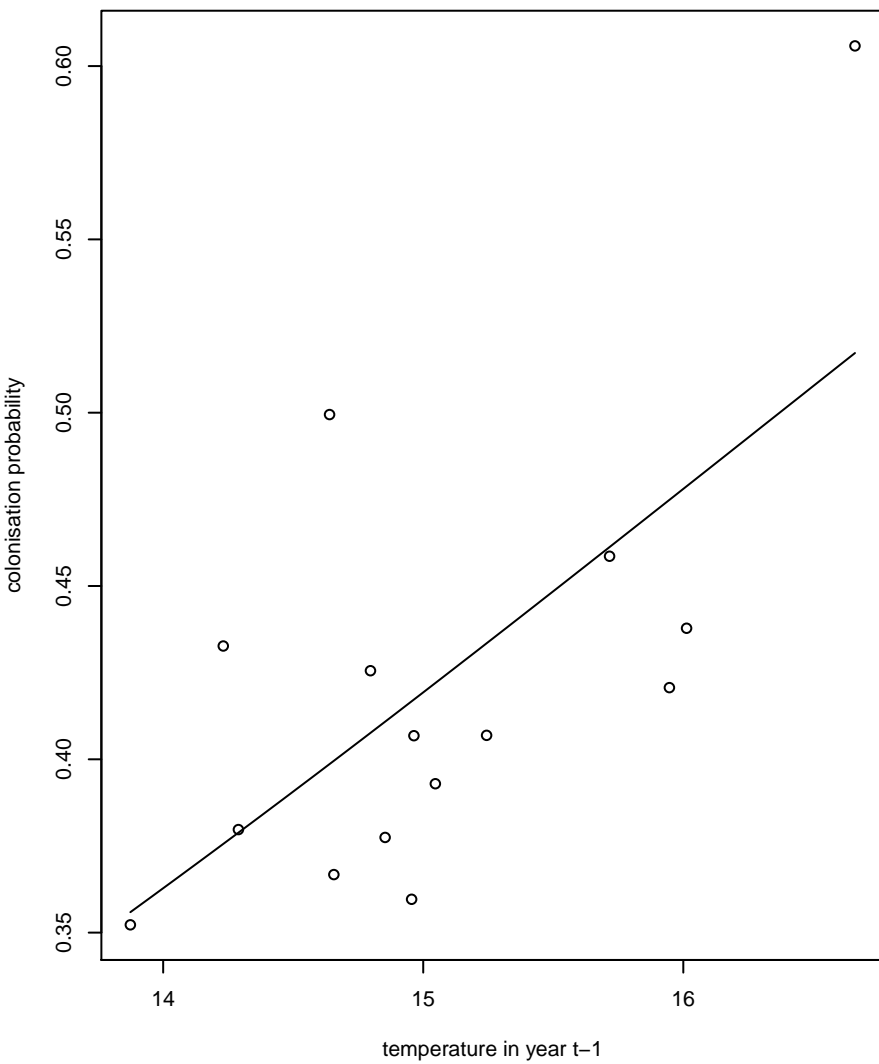

**Coenagrion pulchellum**

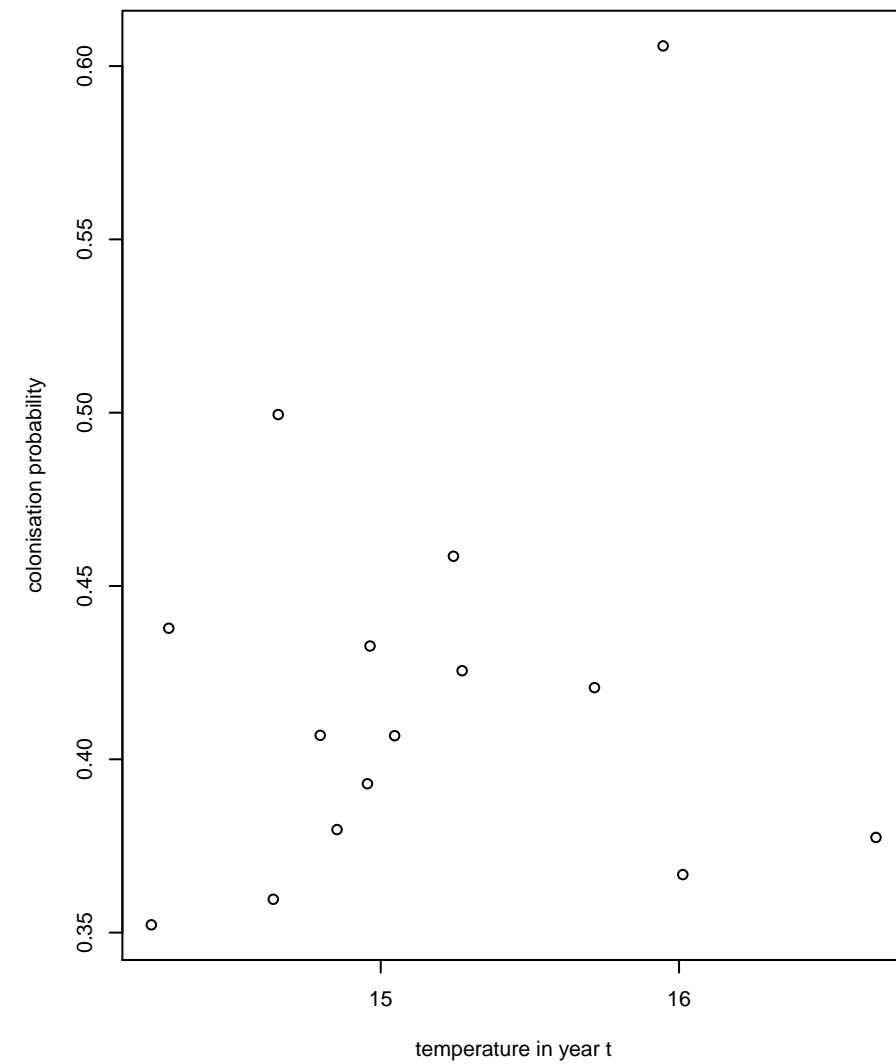

**Sympetrum vulgatum**

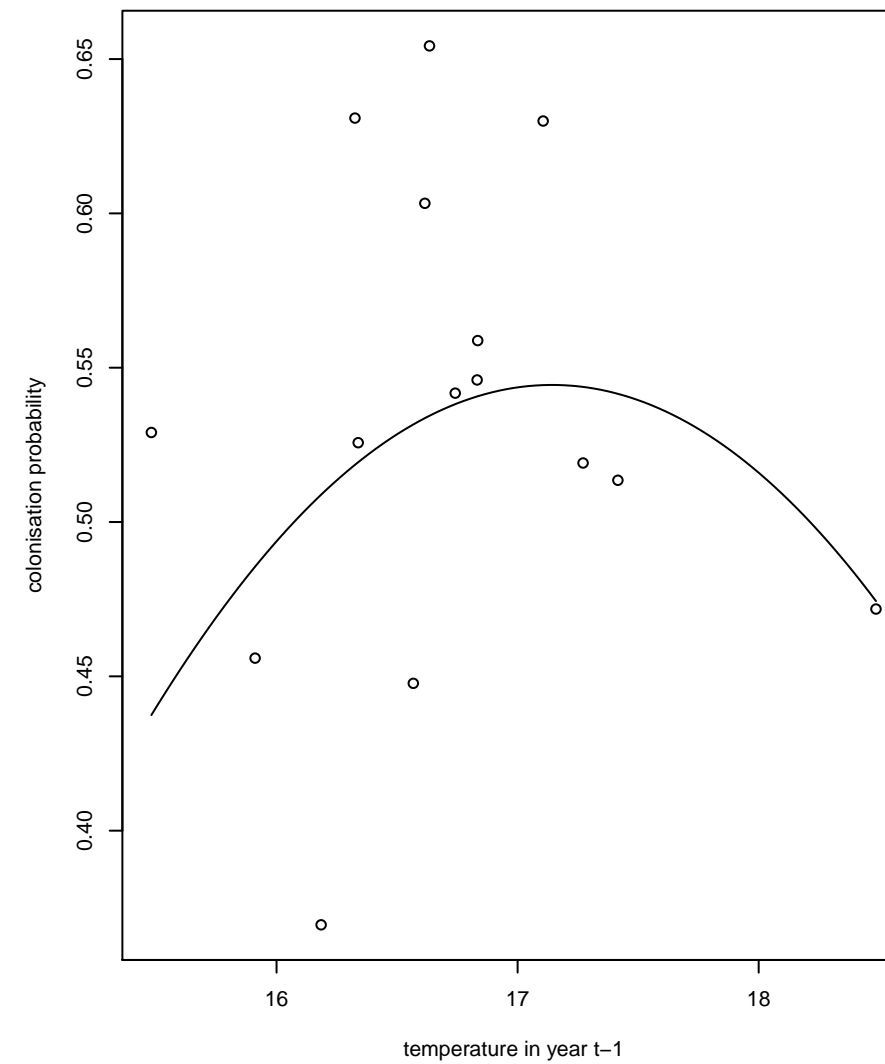

**Sympetrum vulgatum**

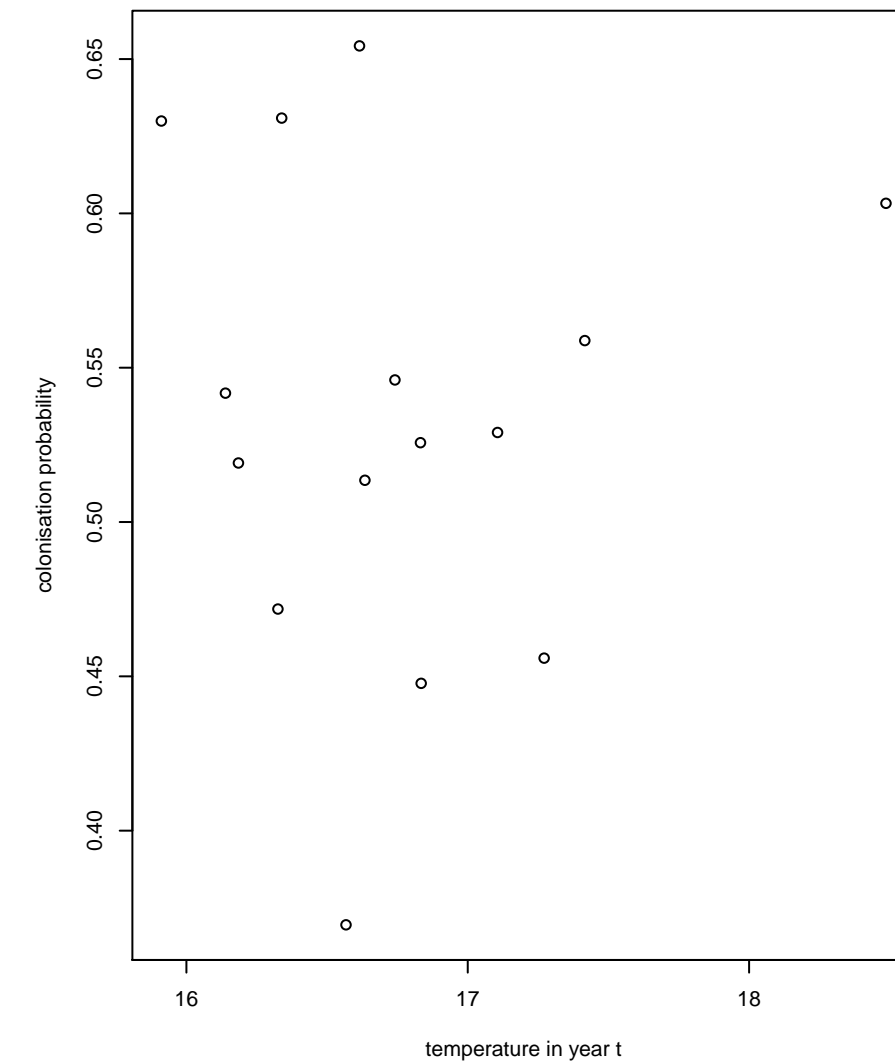

**Ischnura elegans**

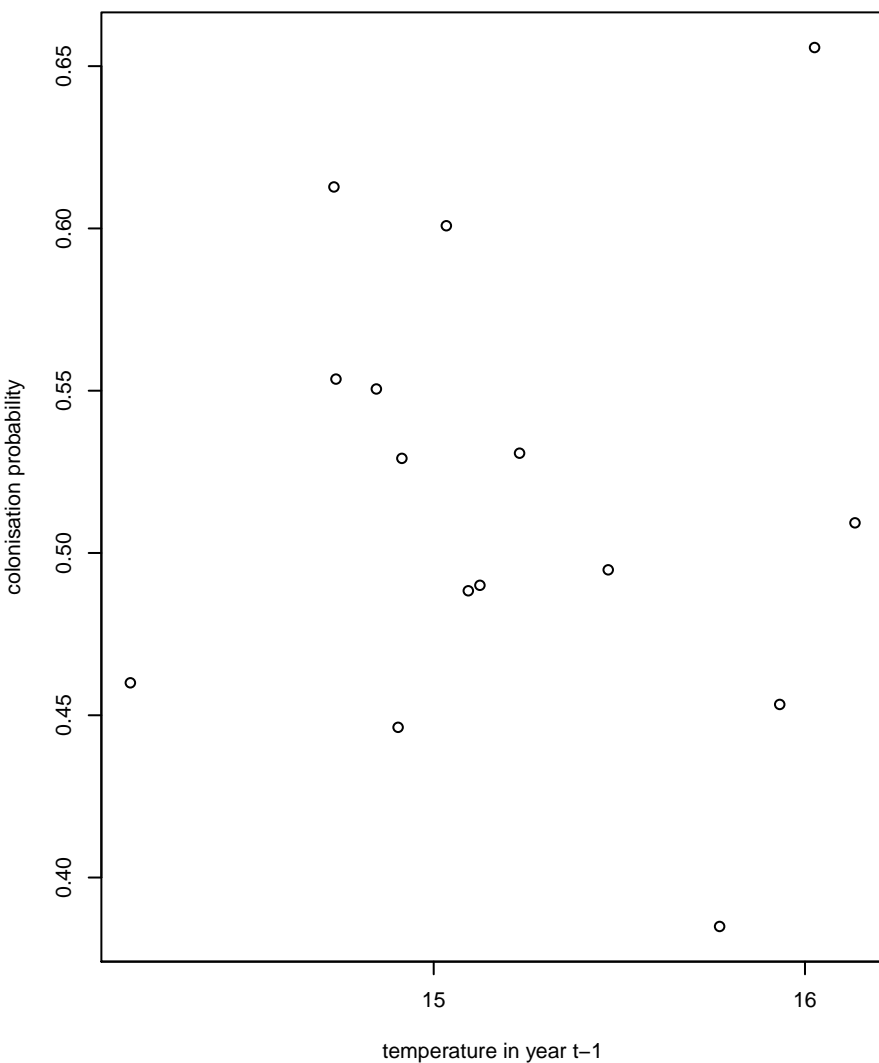

**Ischnura elegans**

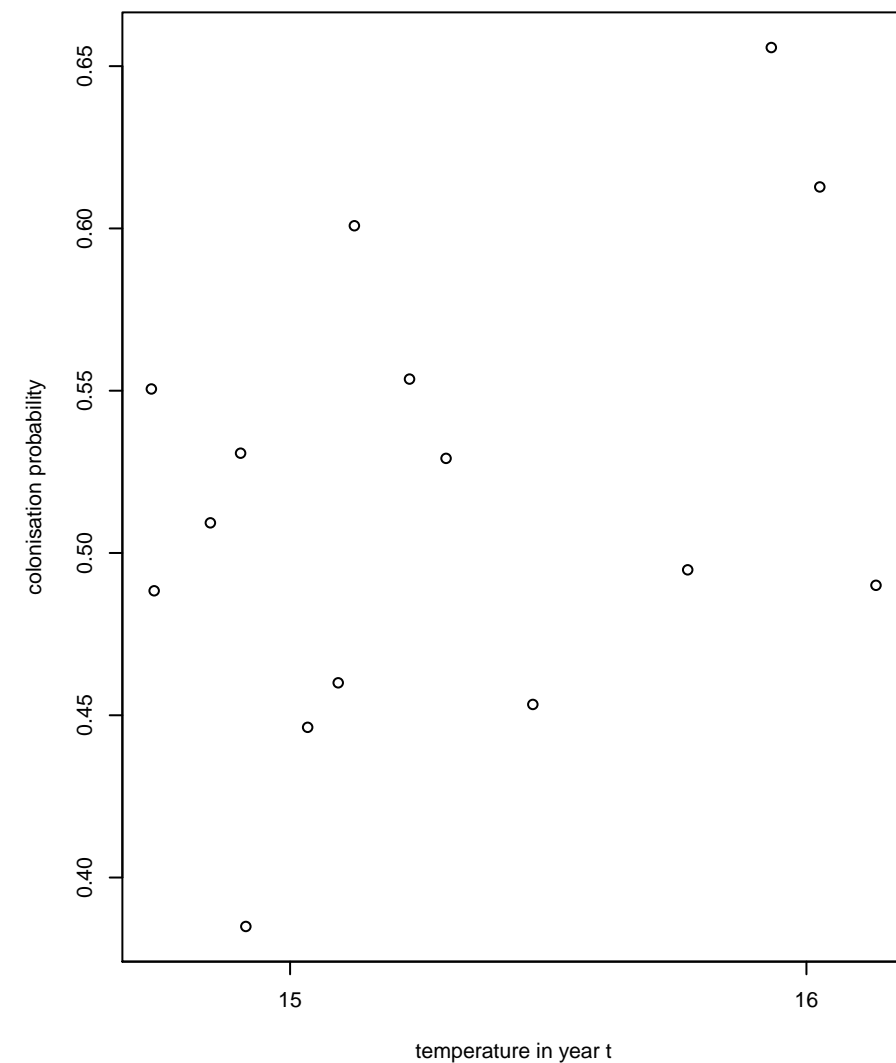

**Orthetrum cancellatum**

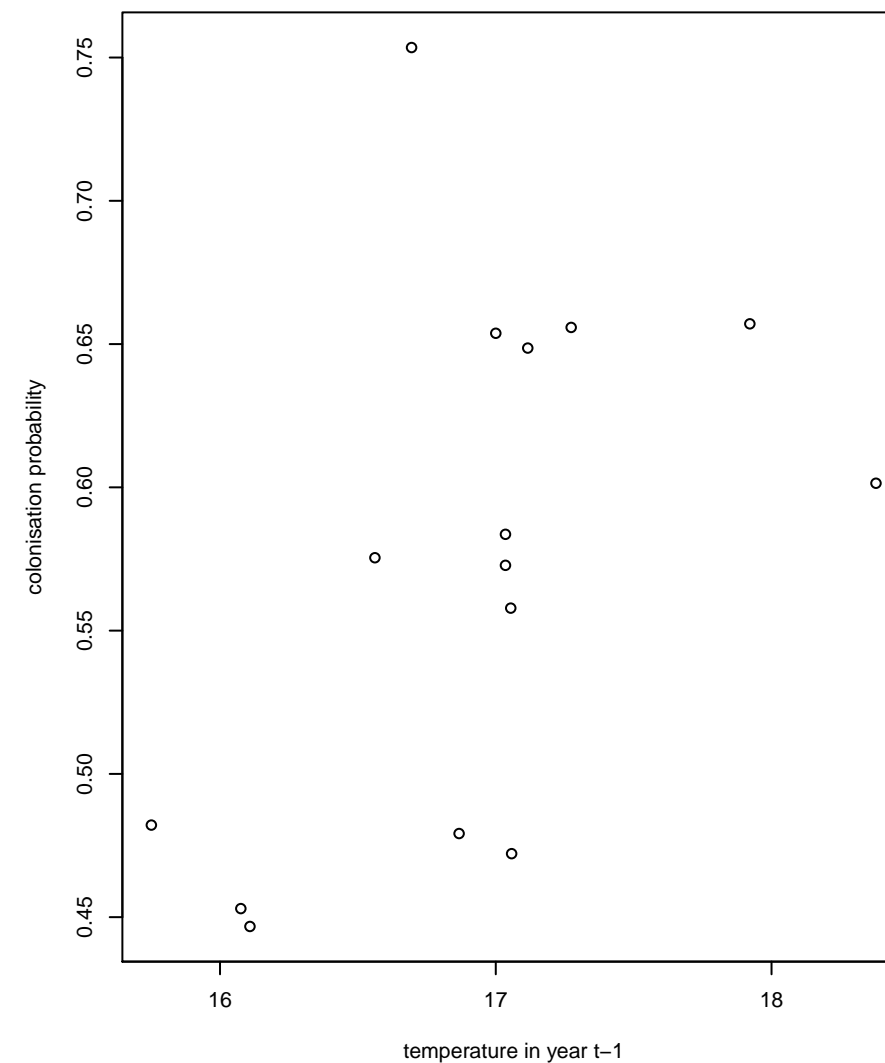

**Orthetrum cancellatum**

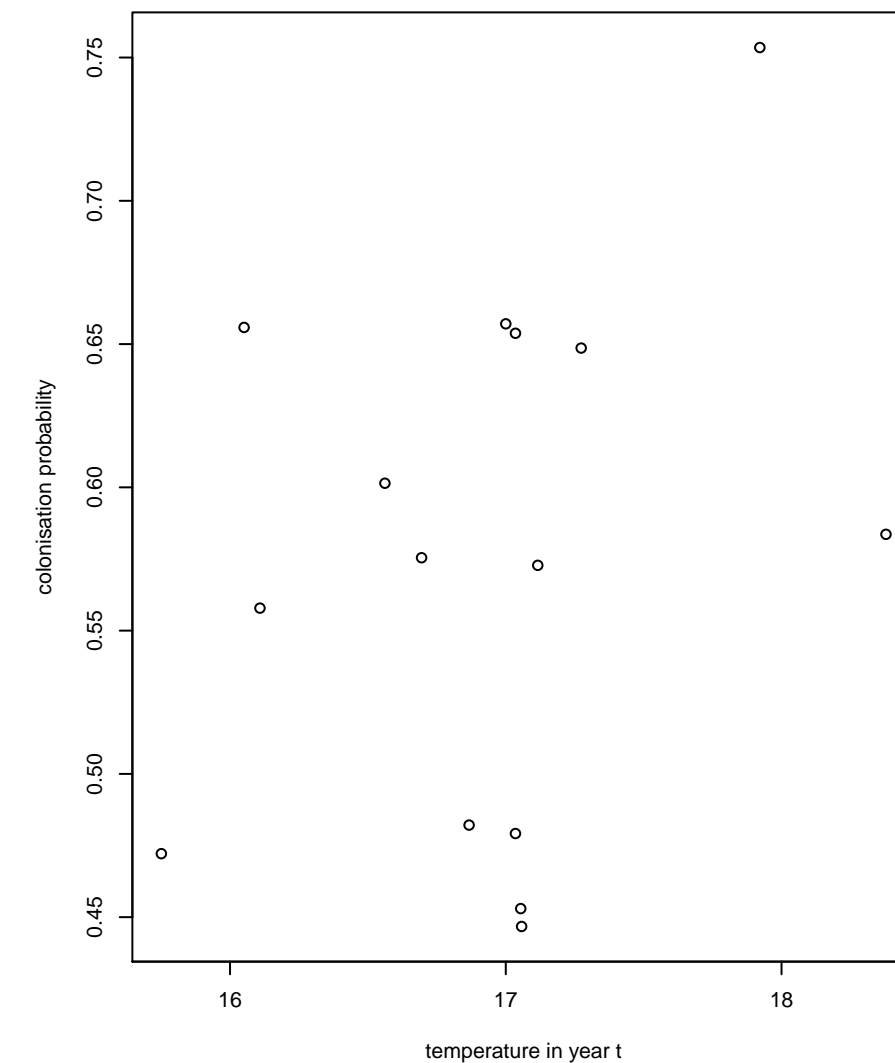

**Libellula quadrimaculata**

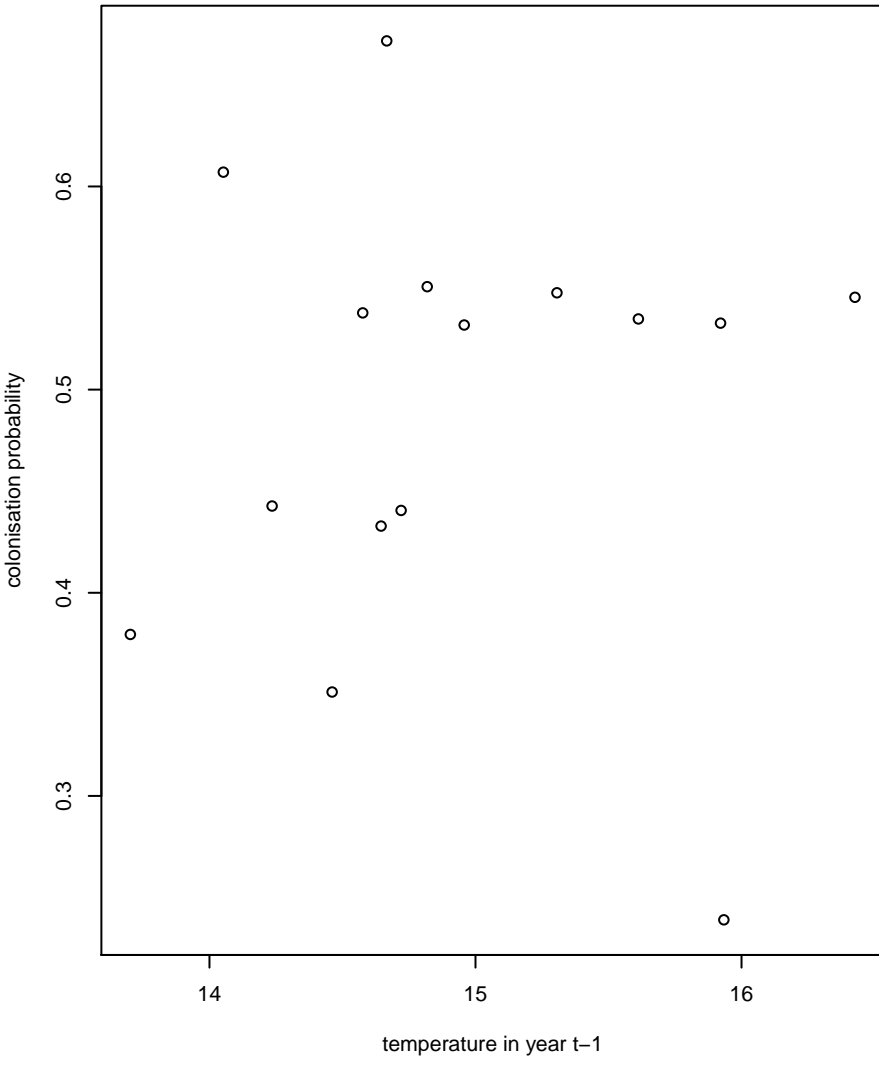

**Libellula quadrimaculata**

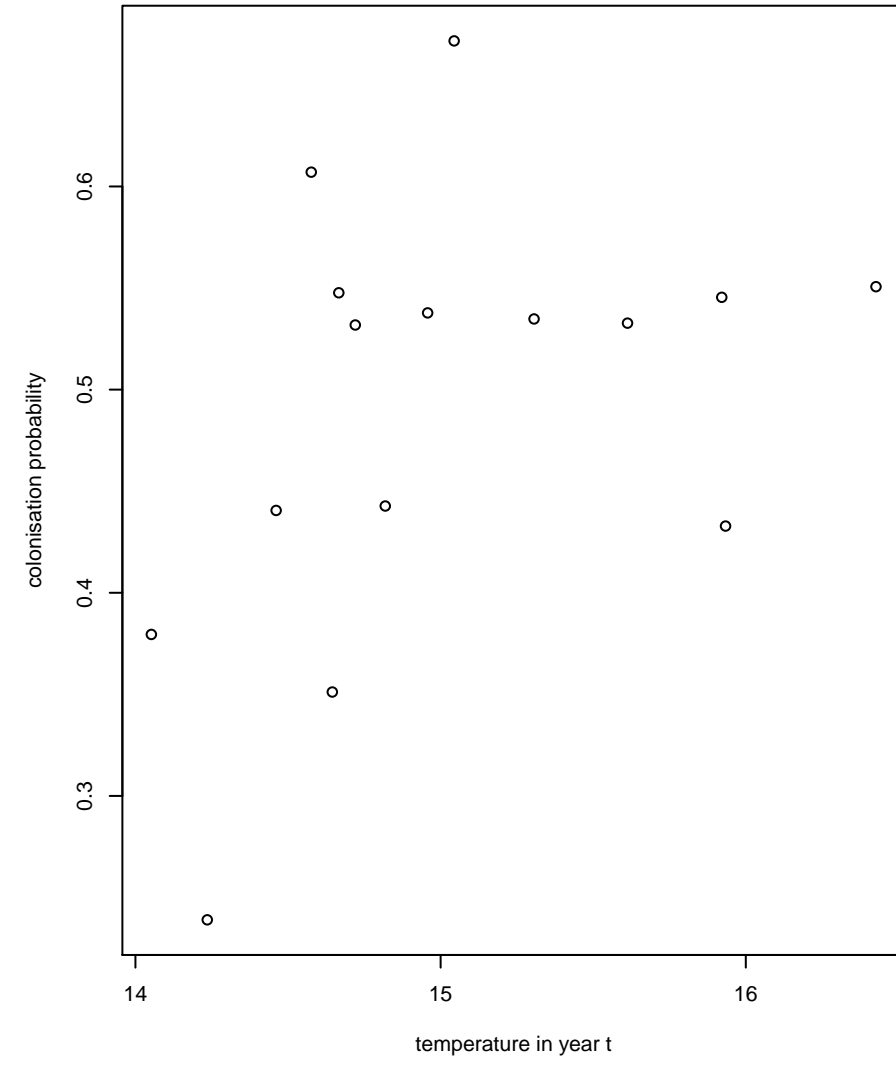

**Lestes sponsa**

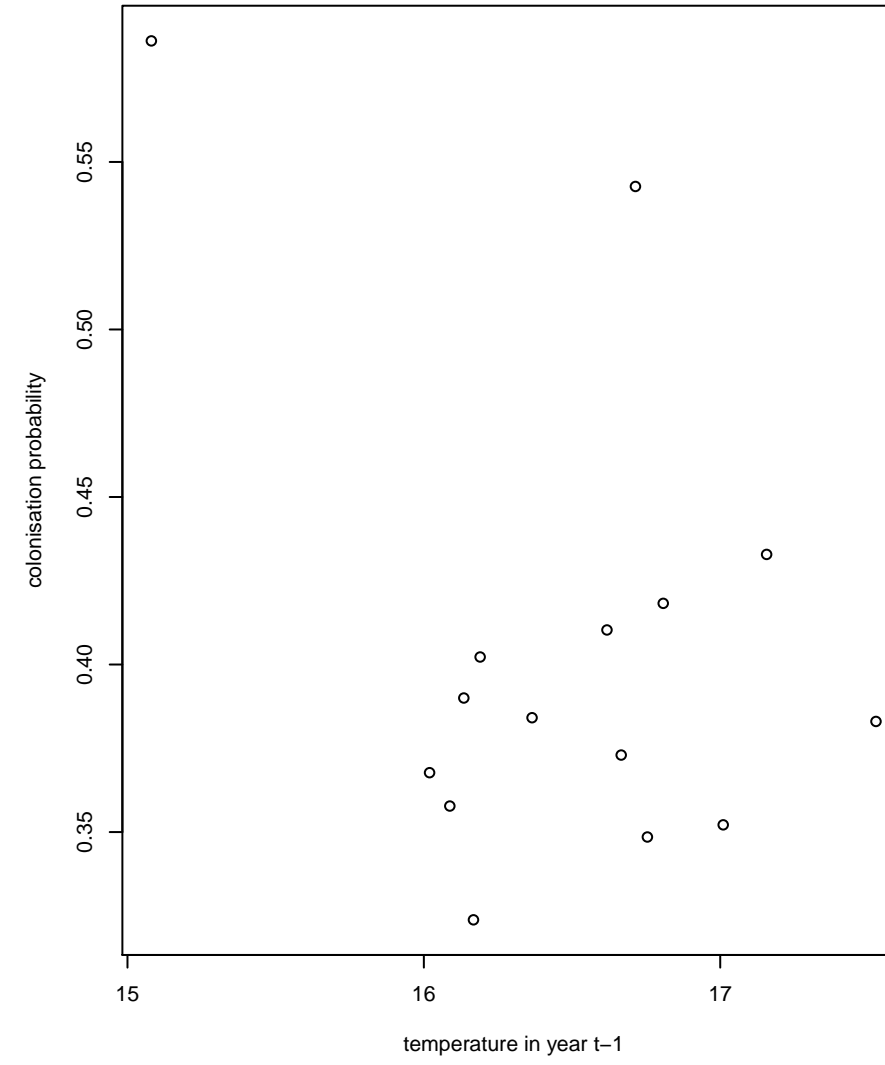

**Lestes sponsa**

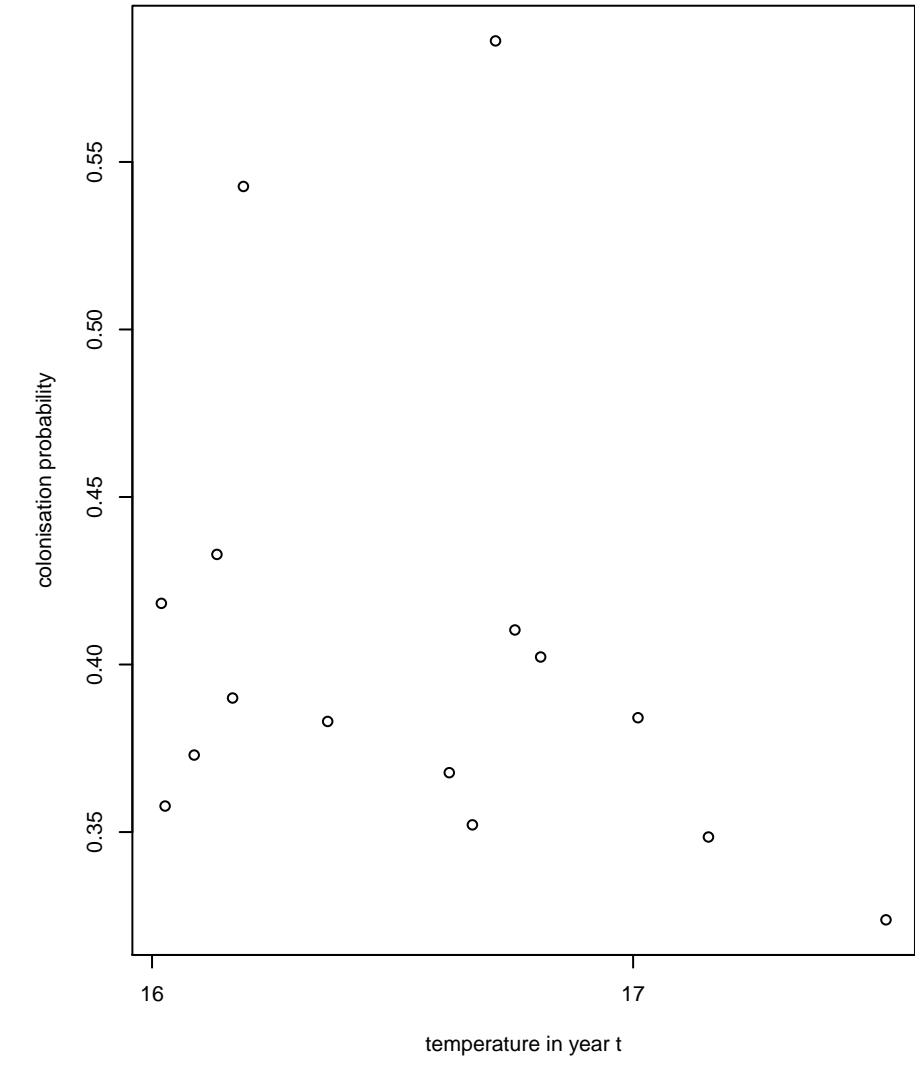

**Ceriagrion tenellum**

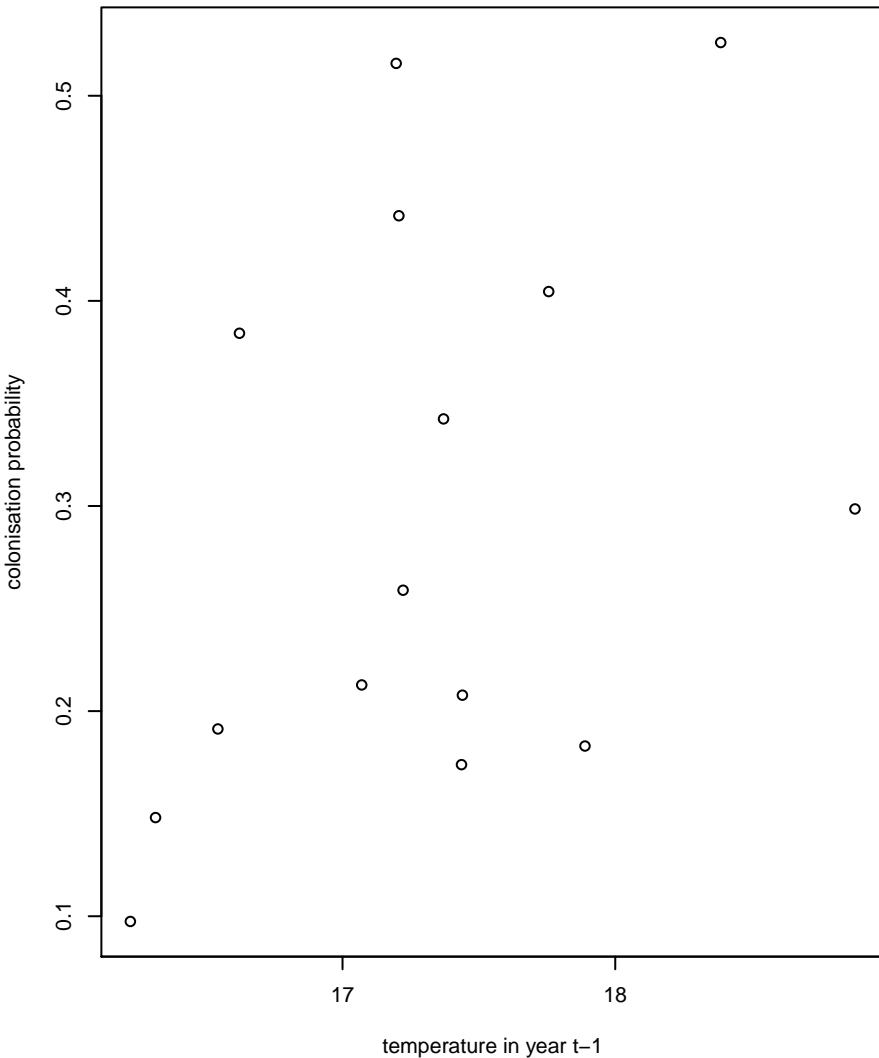

**Ceriagrion tenellum**

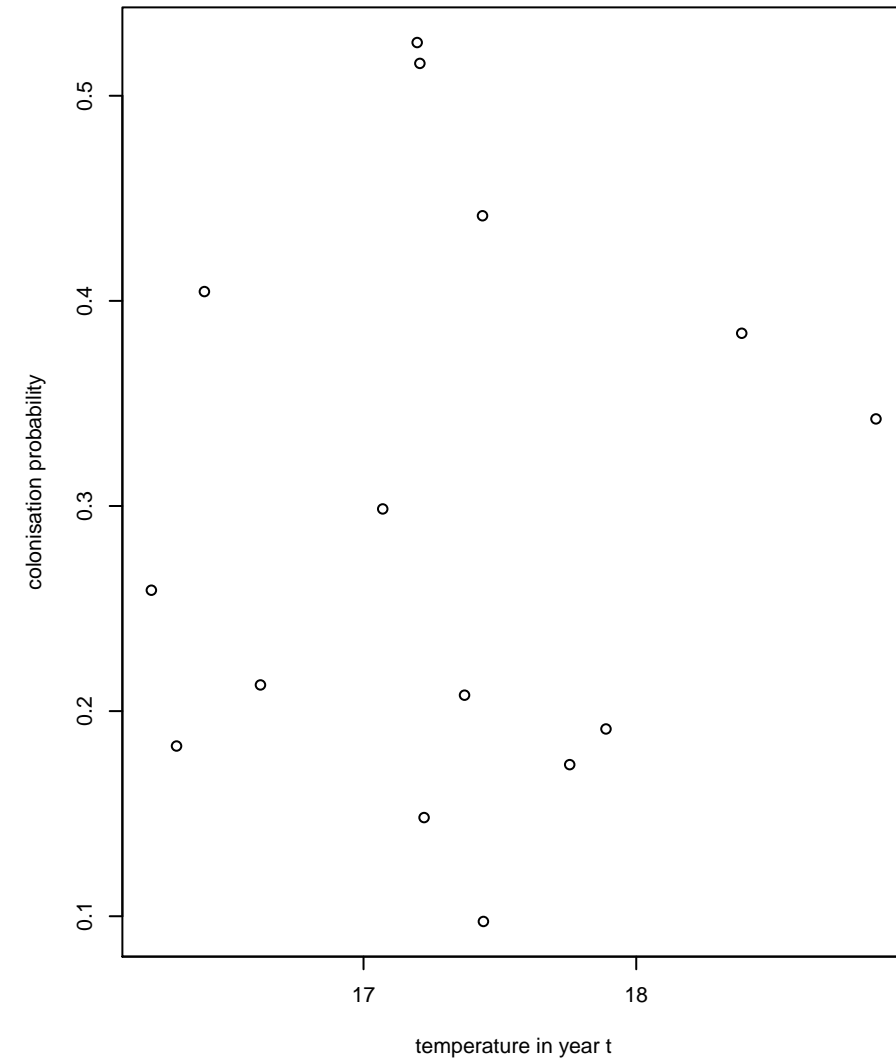

**Lestes barbarus**

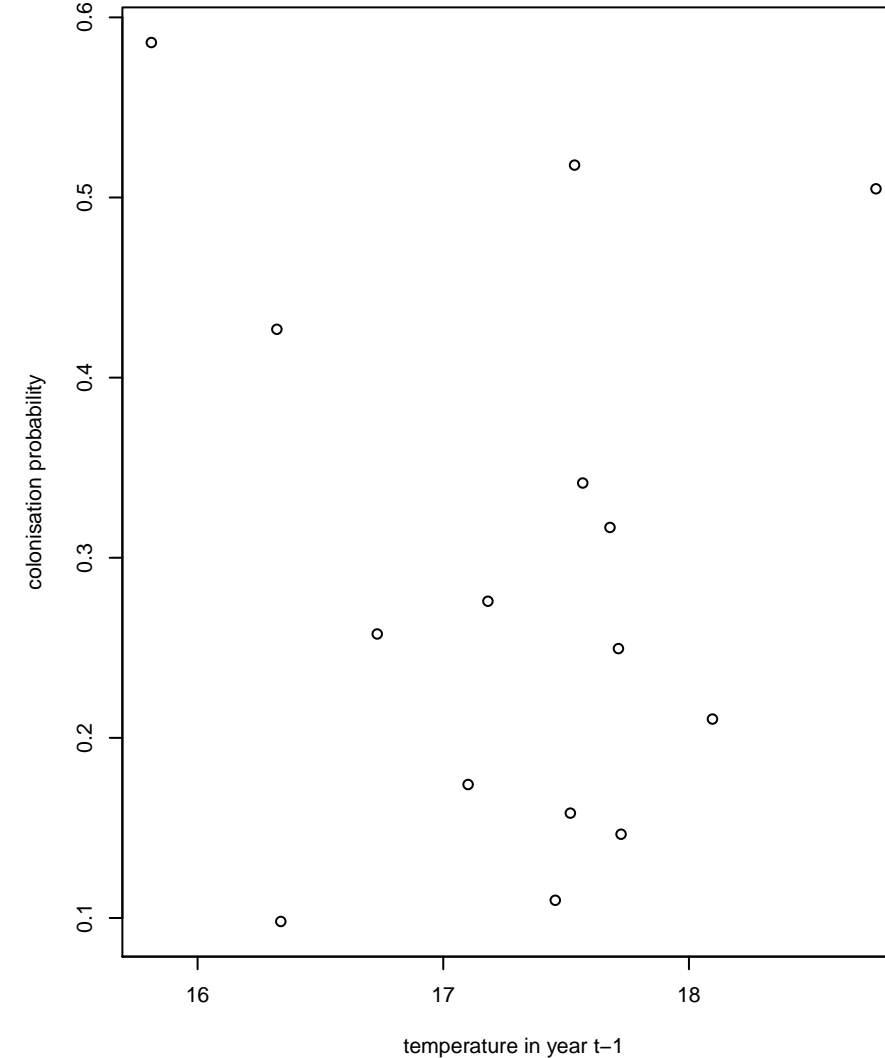

**Lestes barbarus**

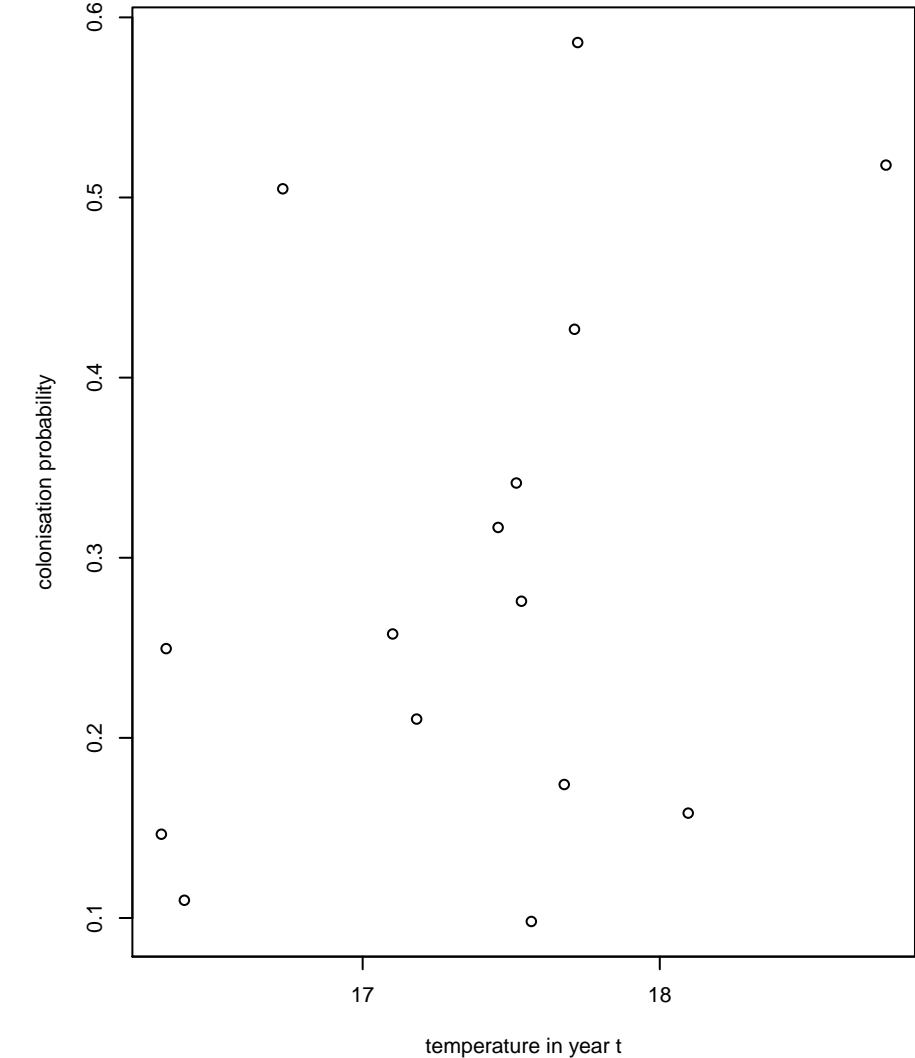

**Aeshna mixta**

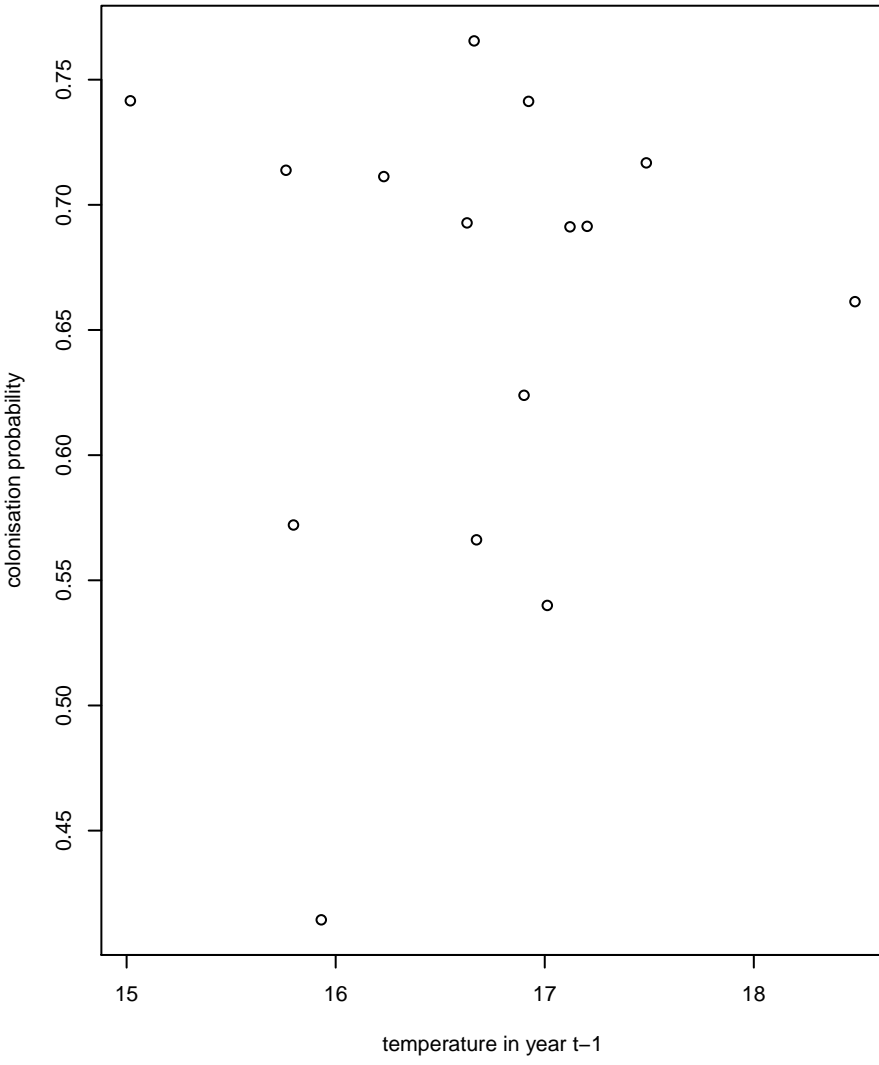

**Aeshna mixta**

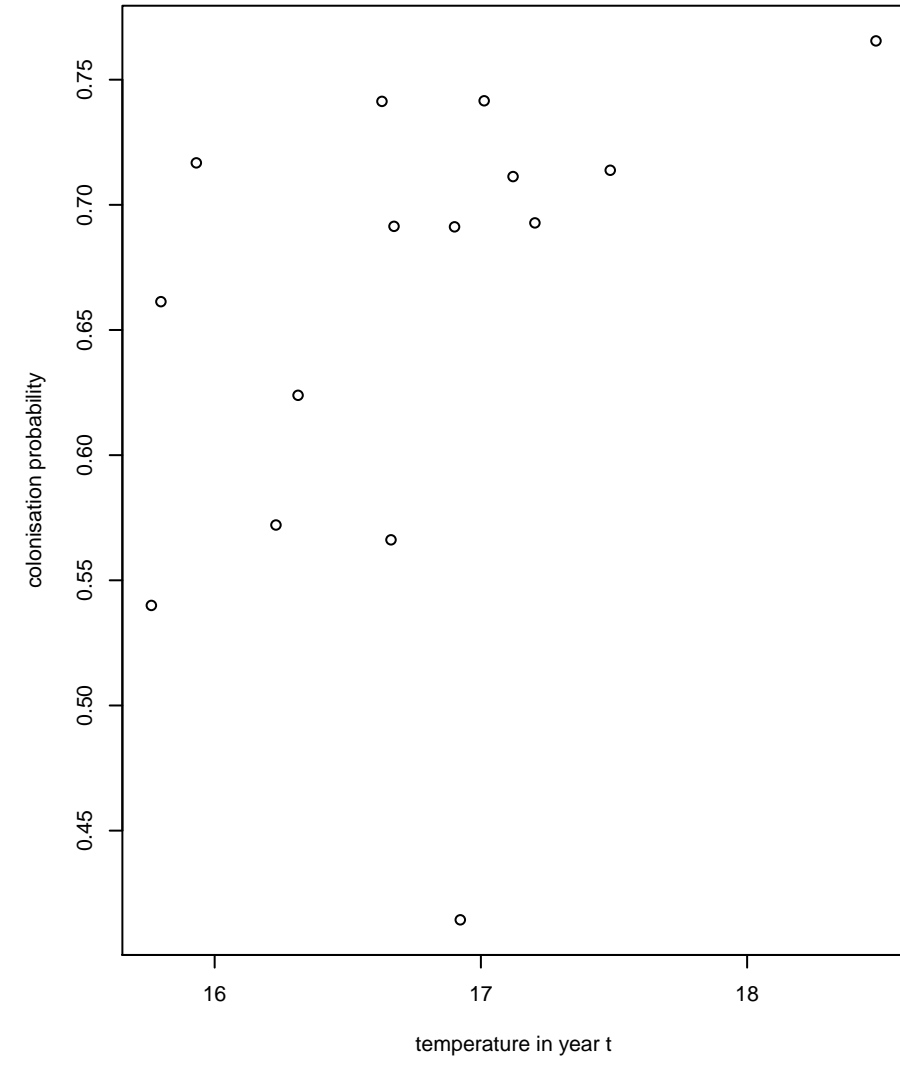

**Sympetrum sanguineum**

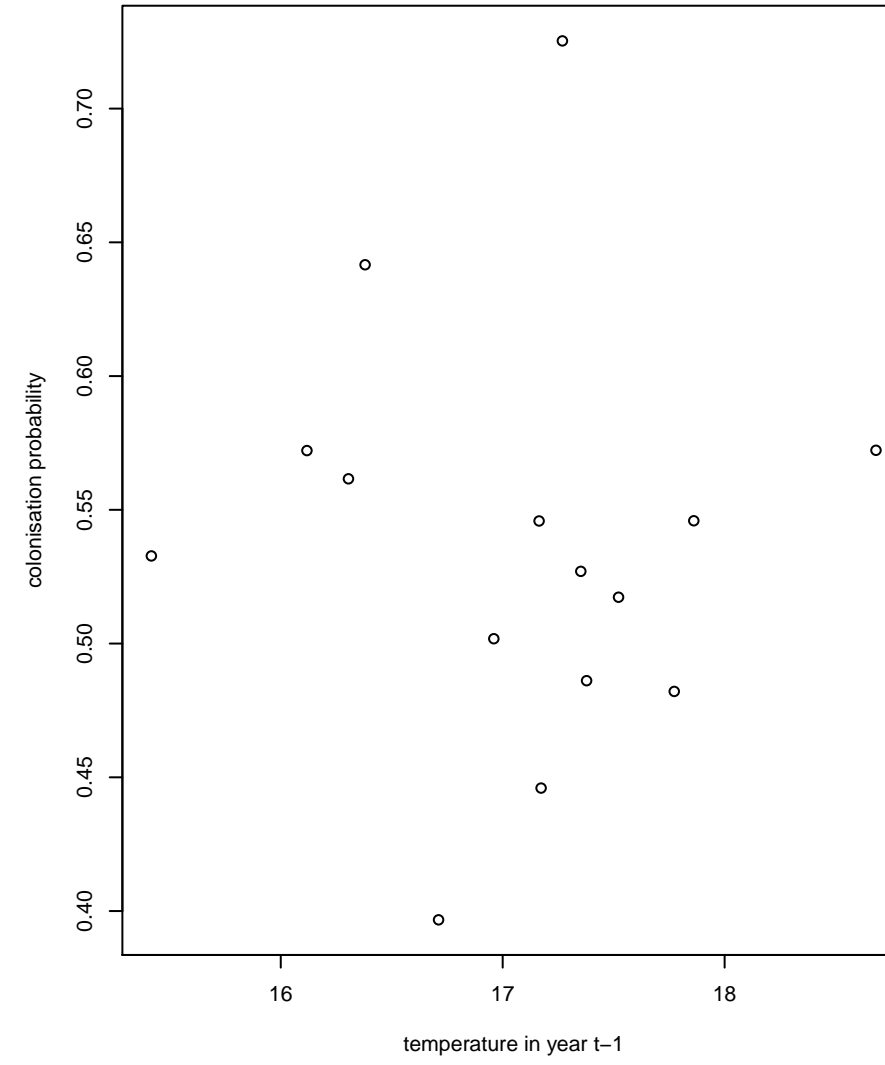

**Sympetrum sanguineum**

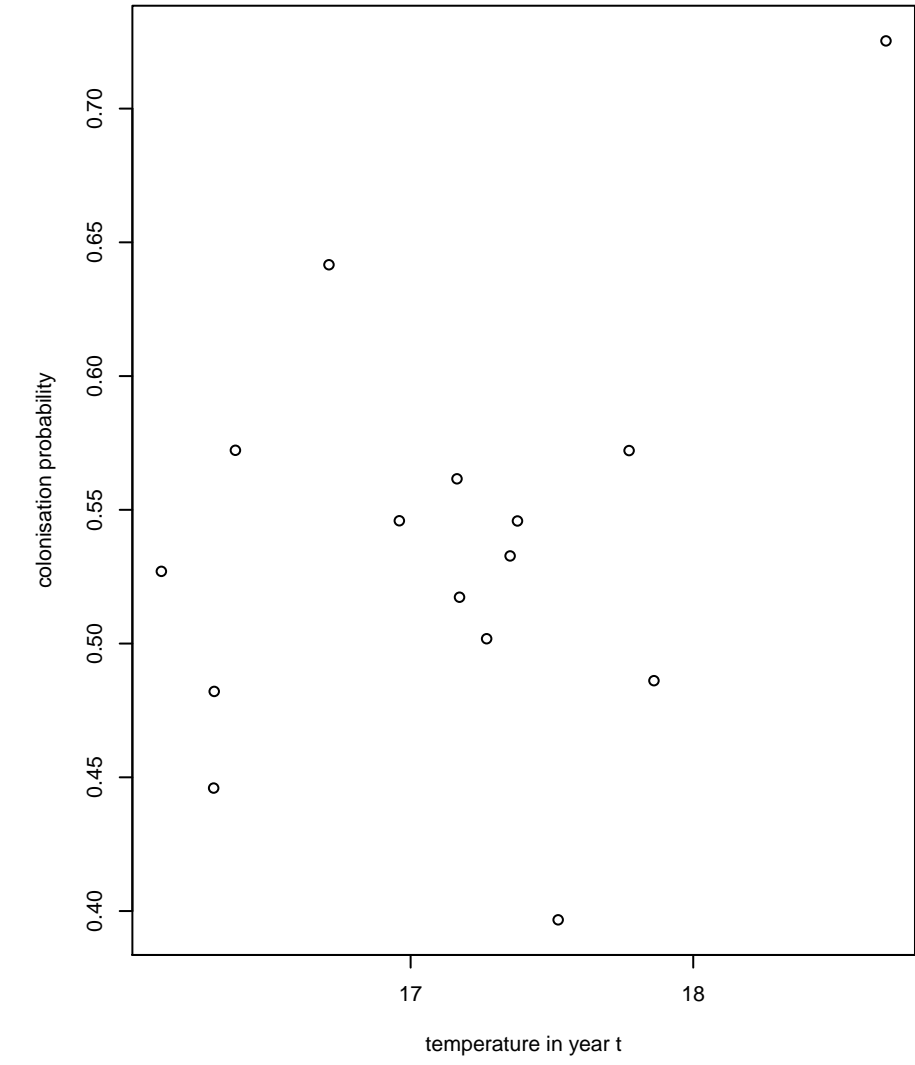

**Lestes viridis**

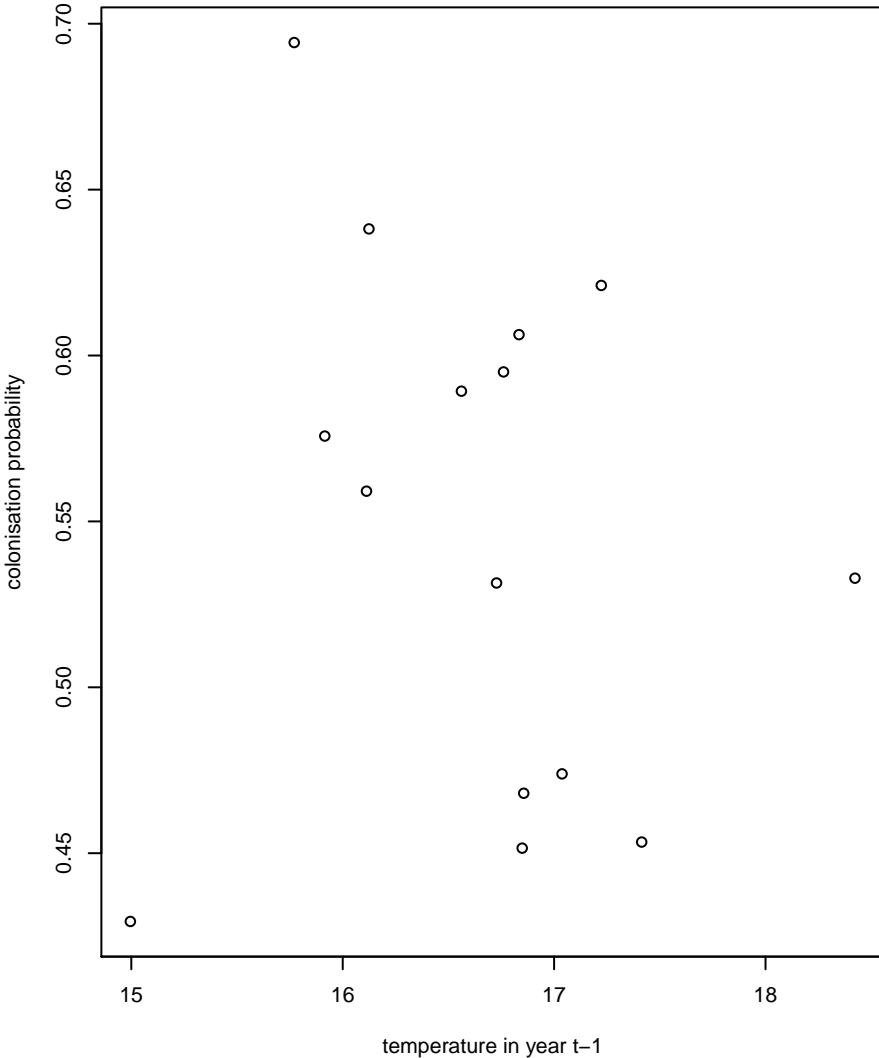

**Lestes viridis**

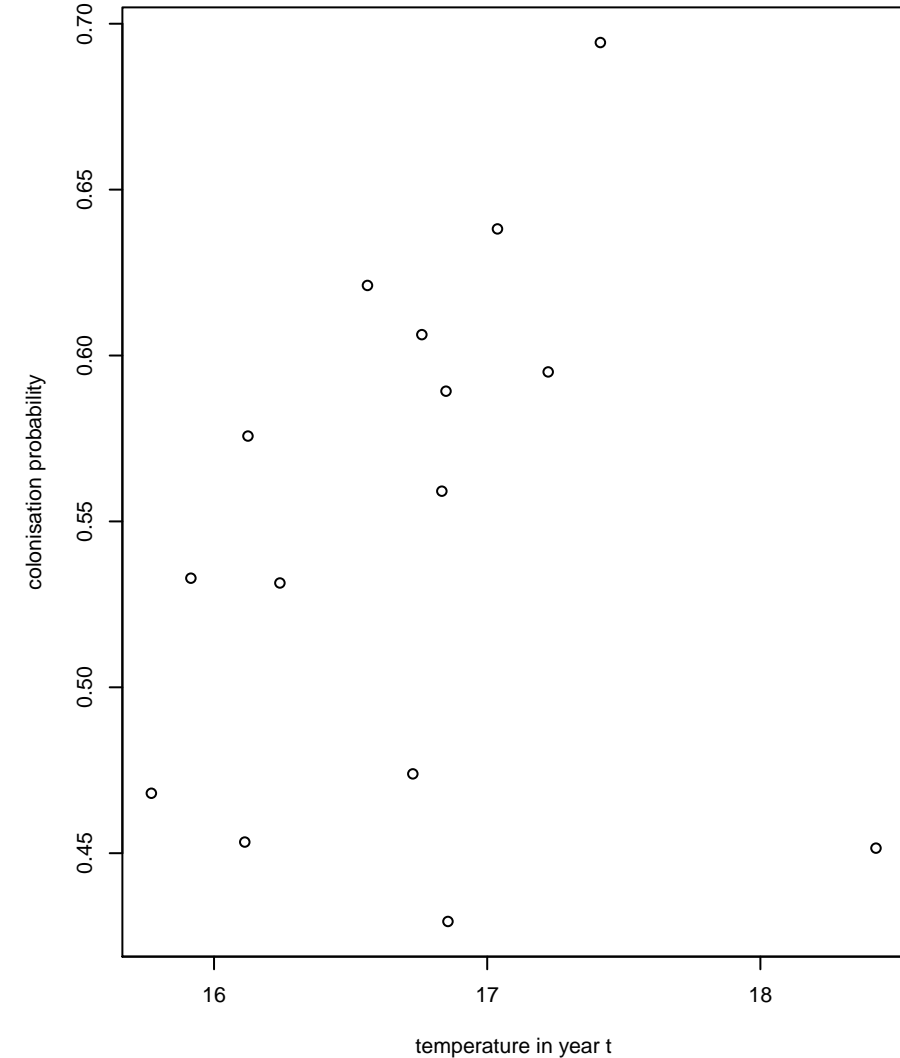

**Calopteryx splendens**

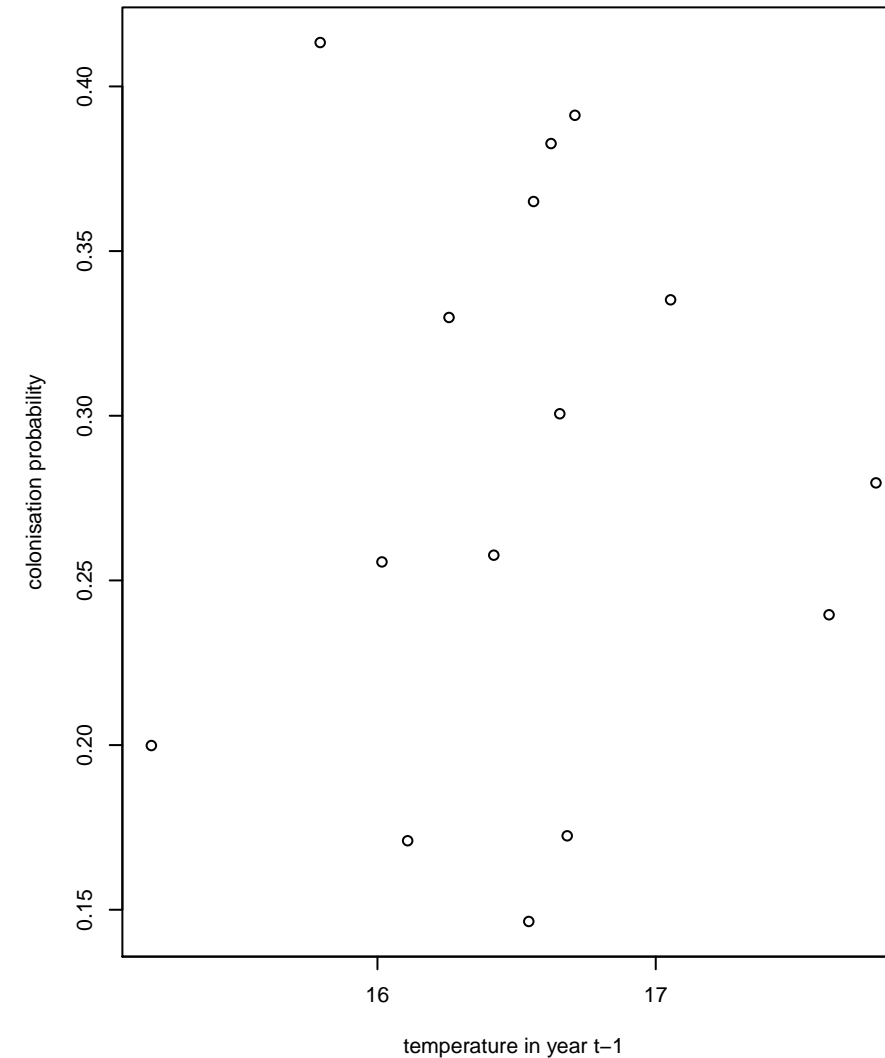

**Calopteryx splendens**

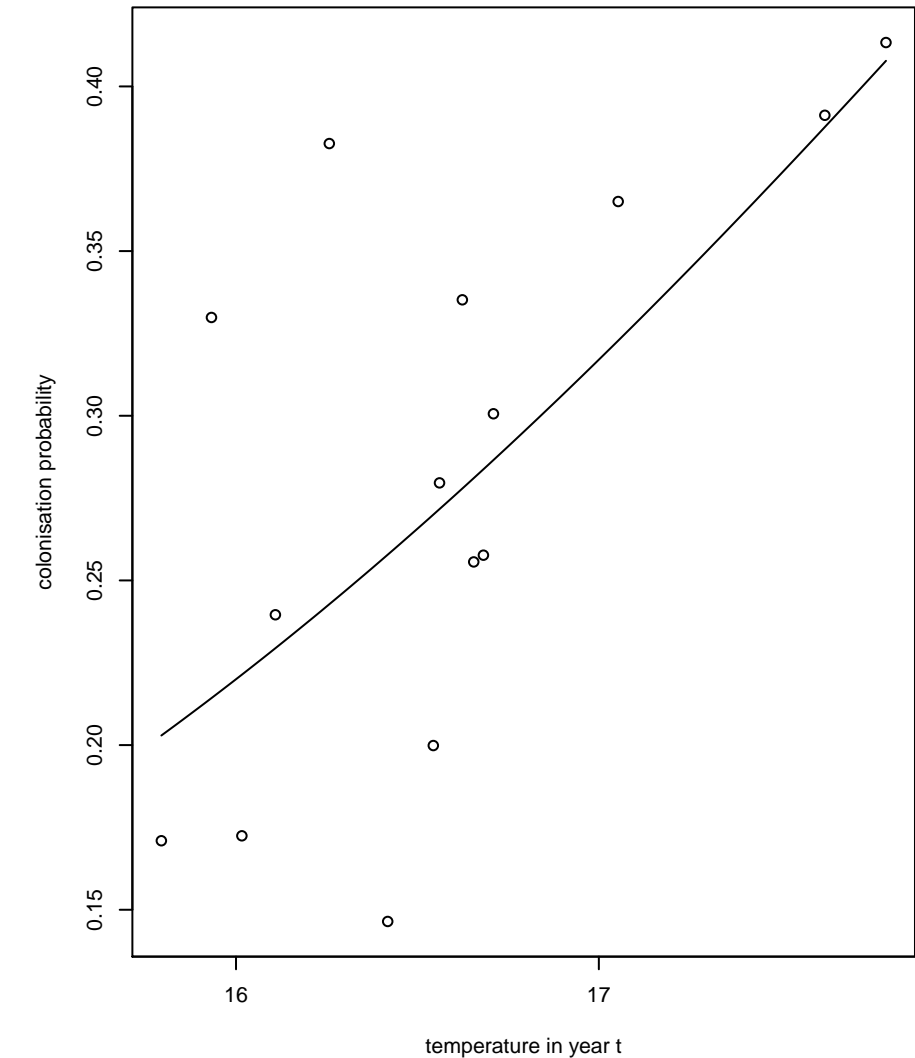

**Sympetrum danae**

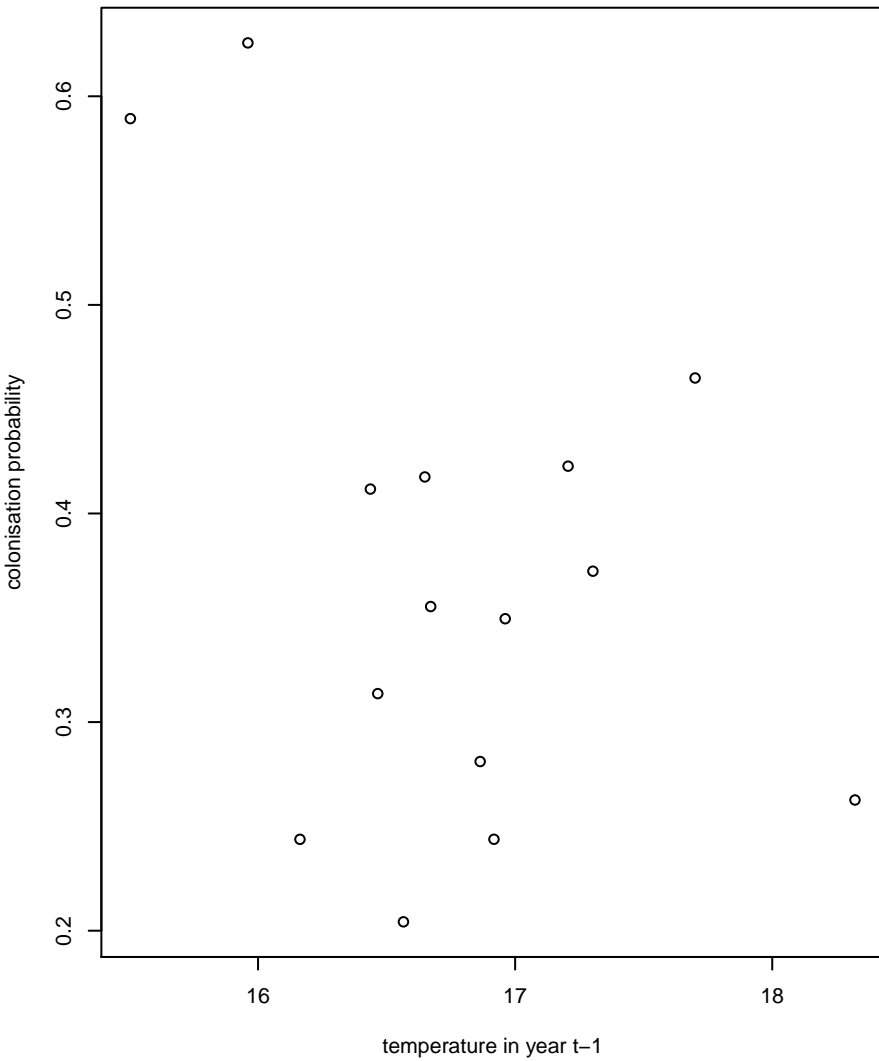

**Sympetrum danae**

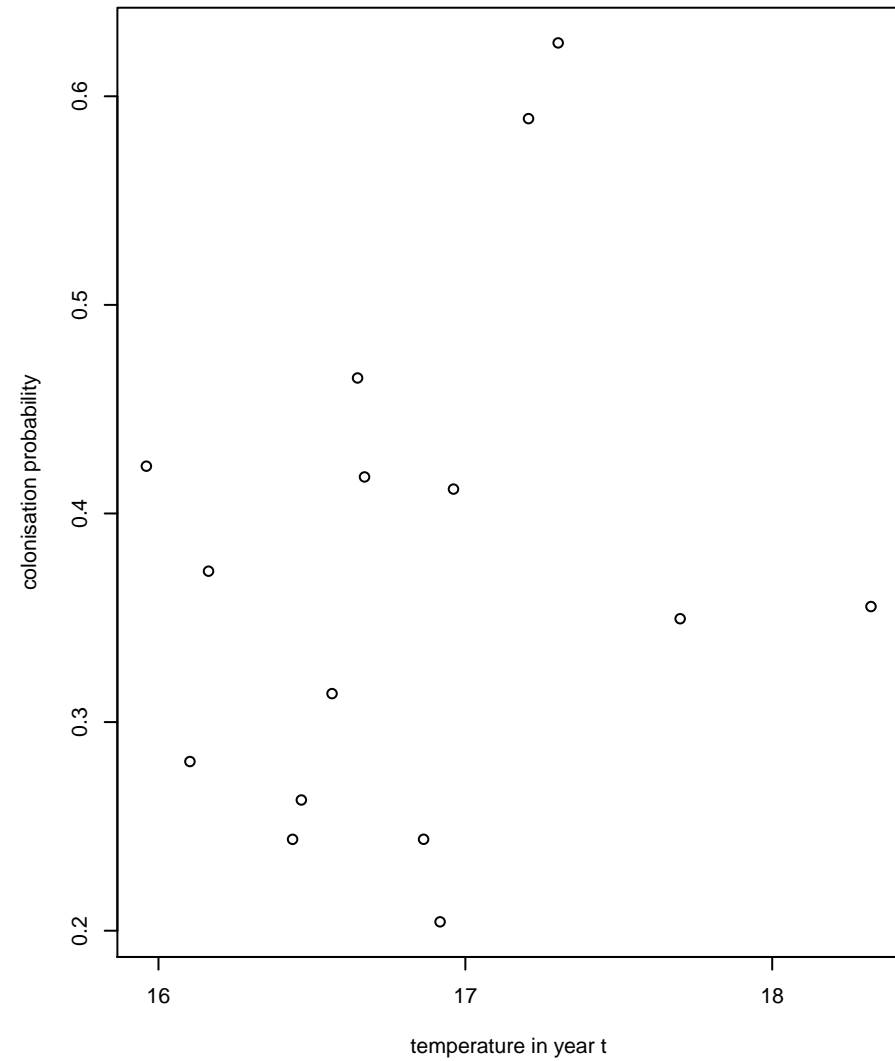

**Leucorrhinia rubicunda**

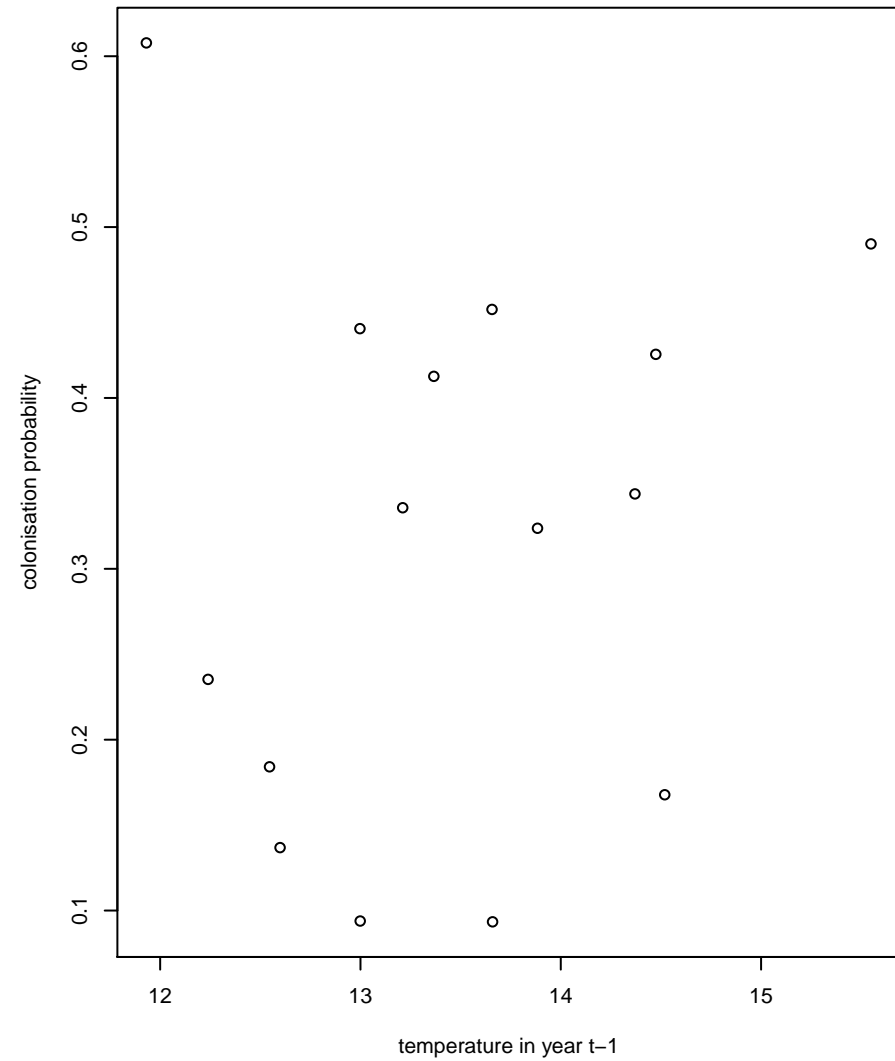

**Leucorrhinia rubicunda**

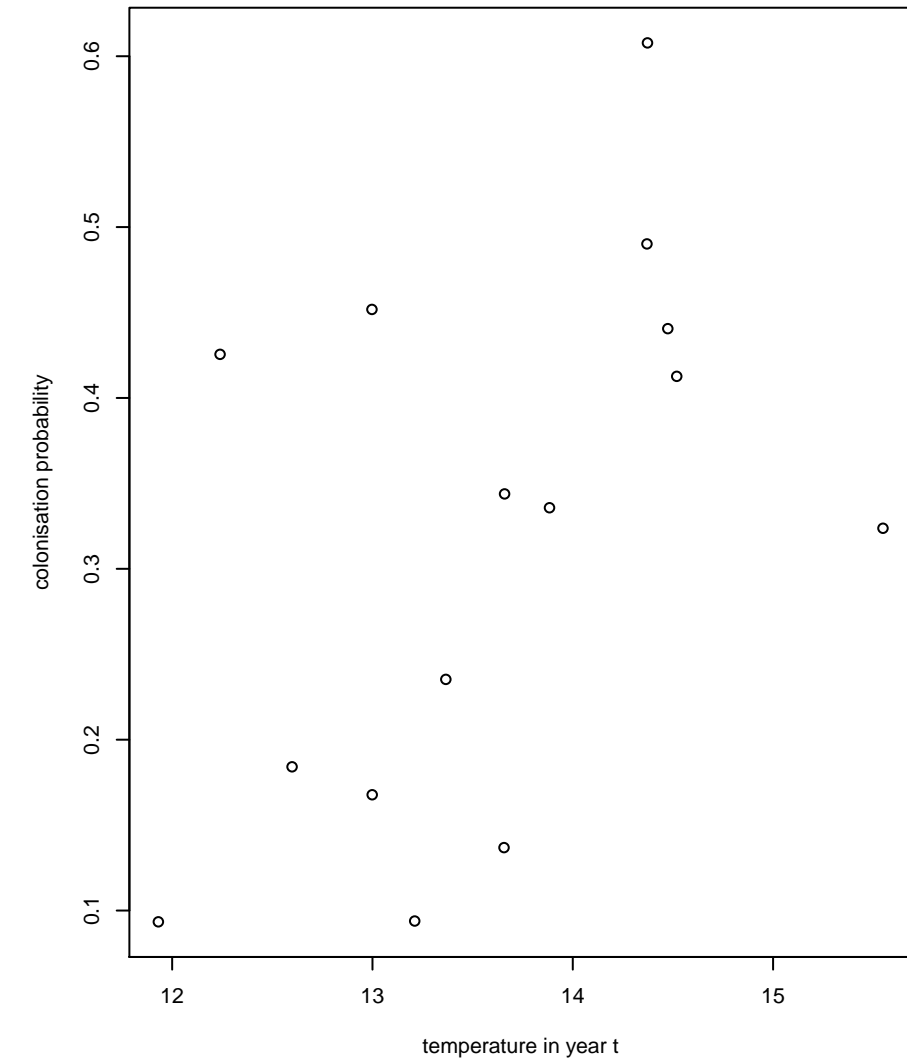

**Enallagma cyathigerum**

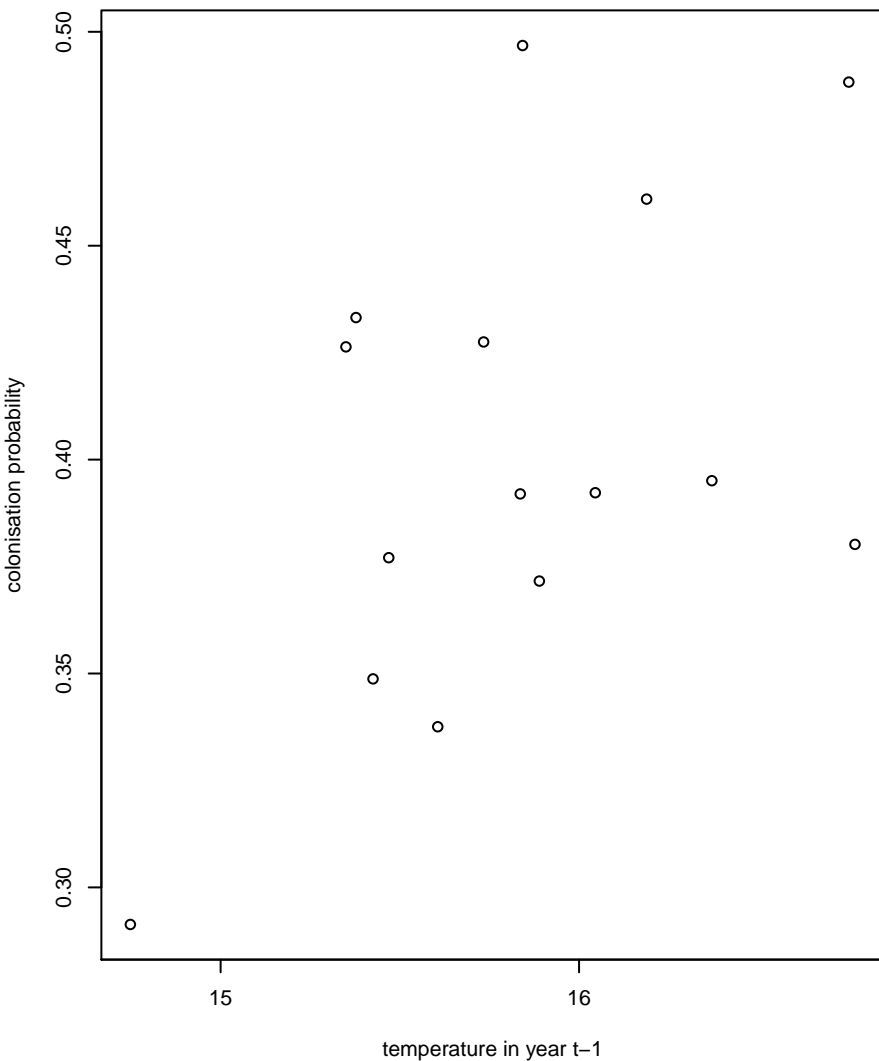

**Enallagma cyathigerum**

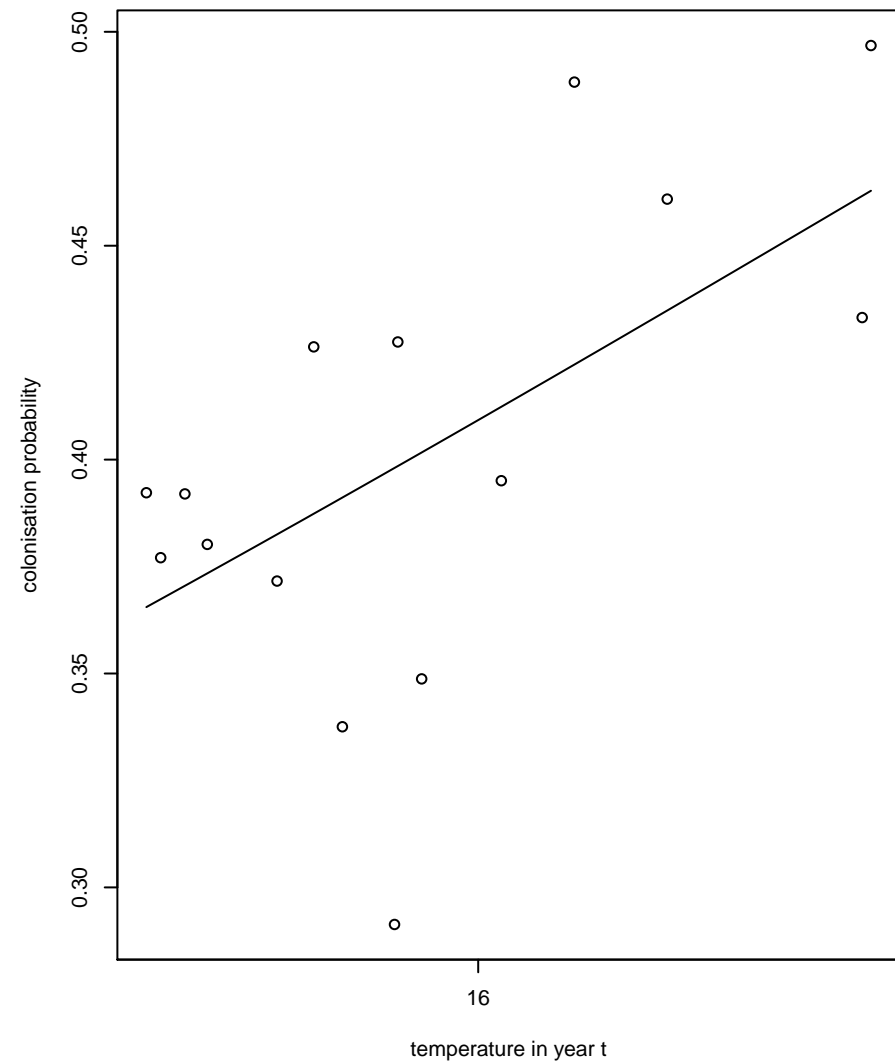

**Calopteryx virgo**

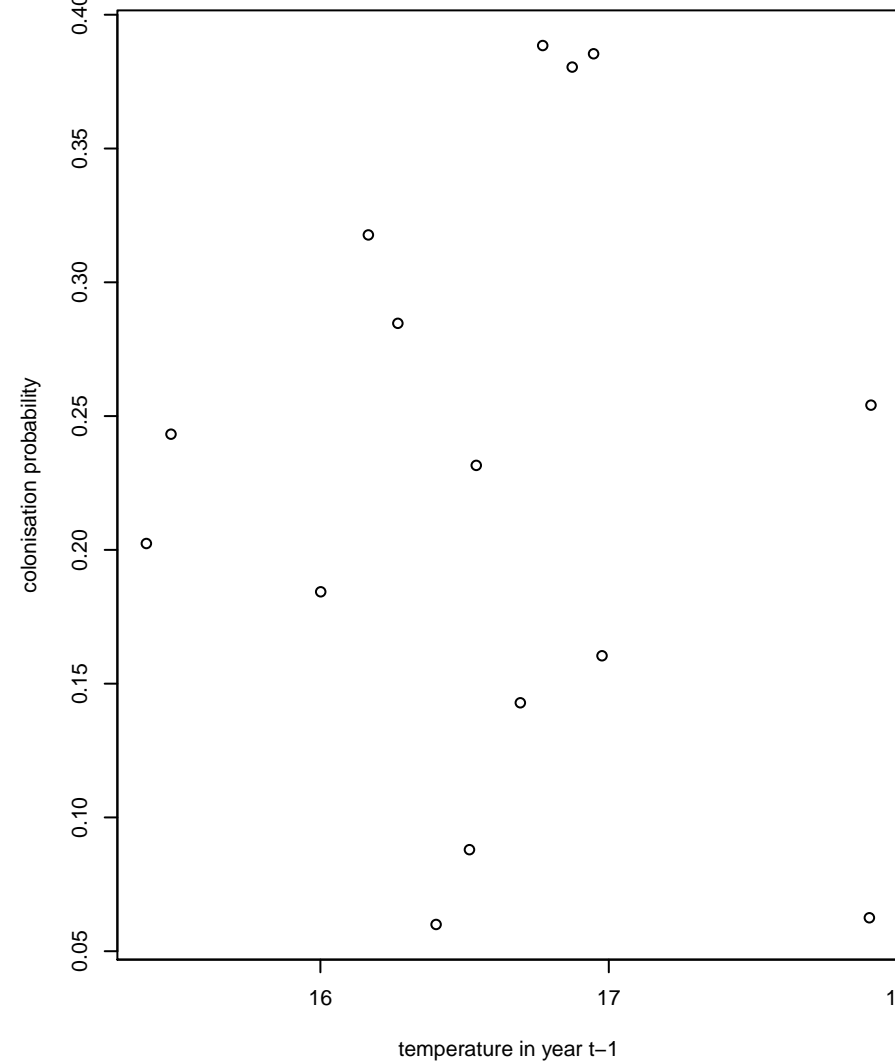

**Calopteryx virgo**

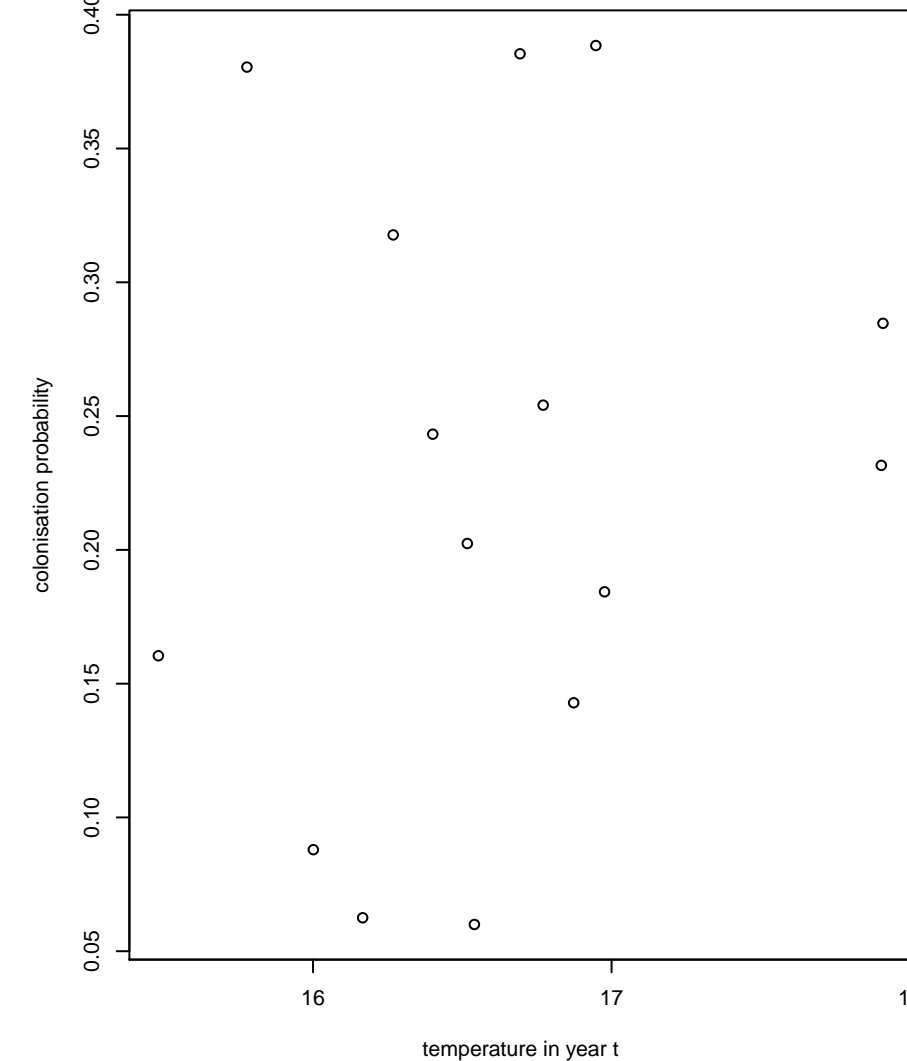



**Ischnura pumilio**

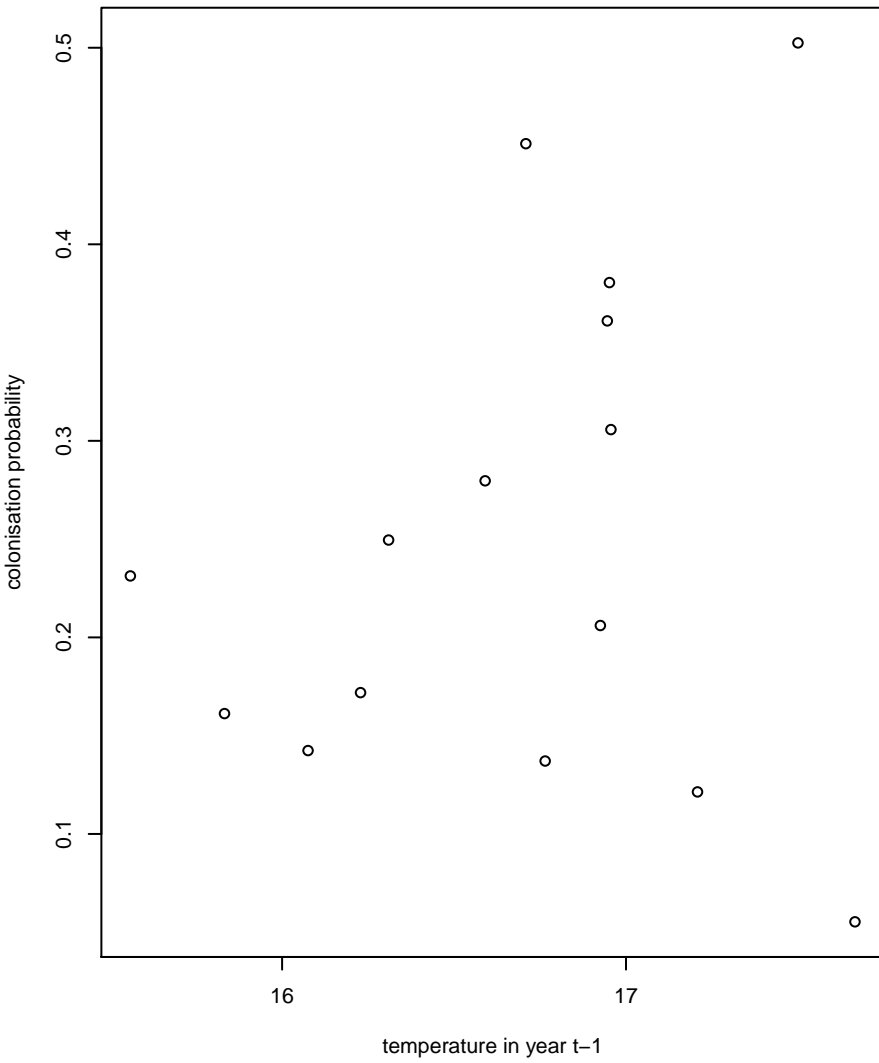

**Ischnura pumilio**

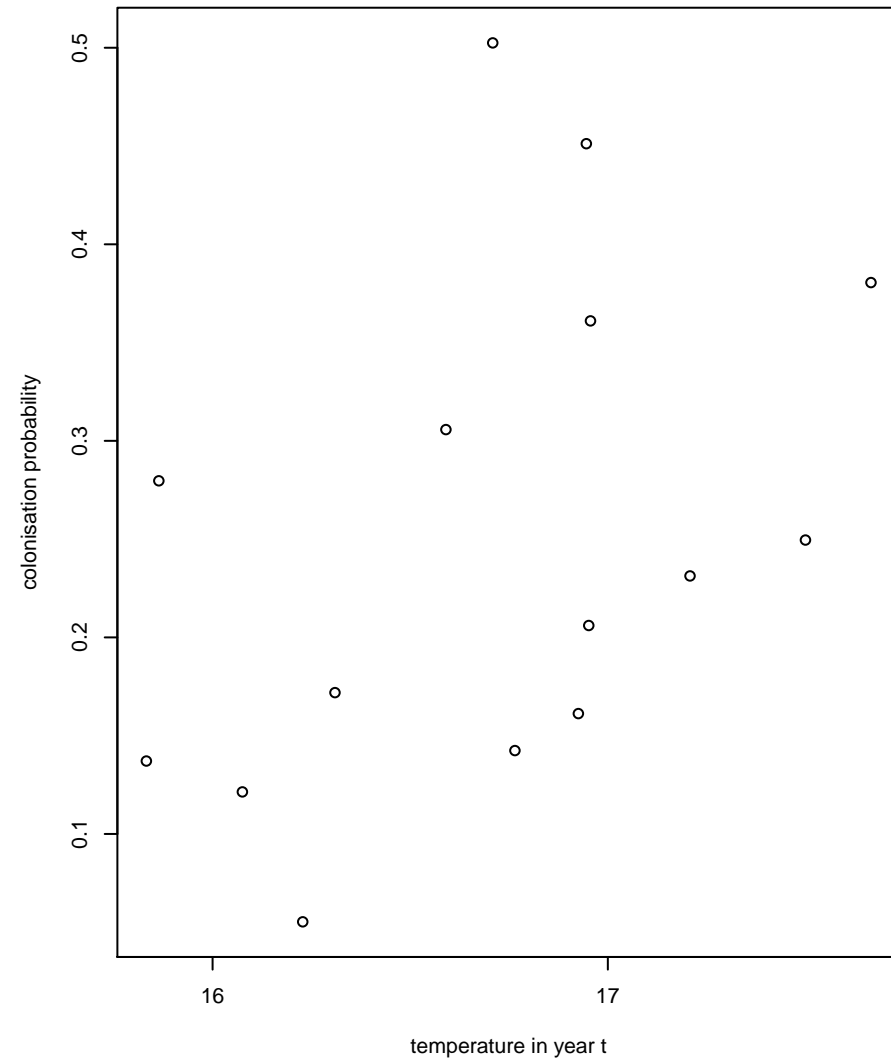

**Aeshna isoceles**

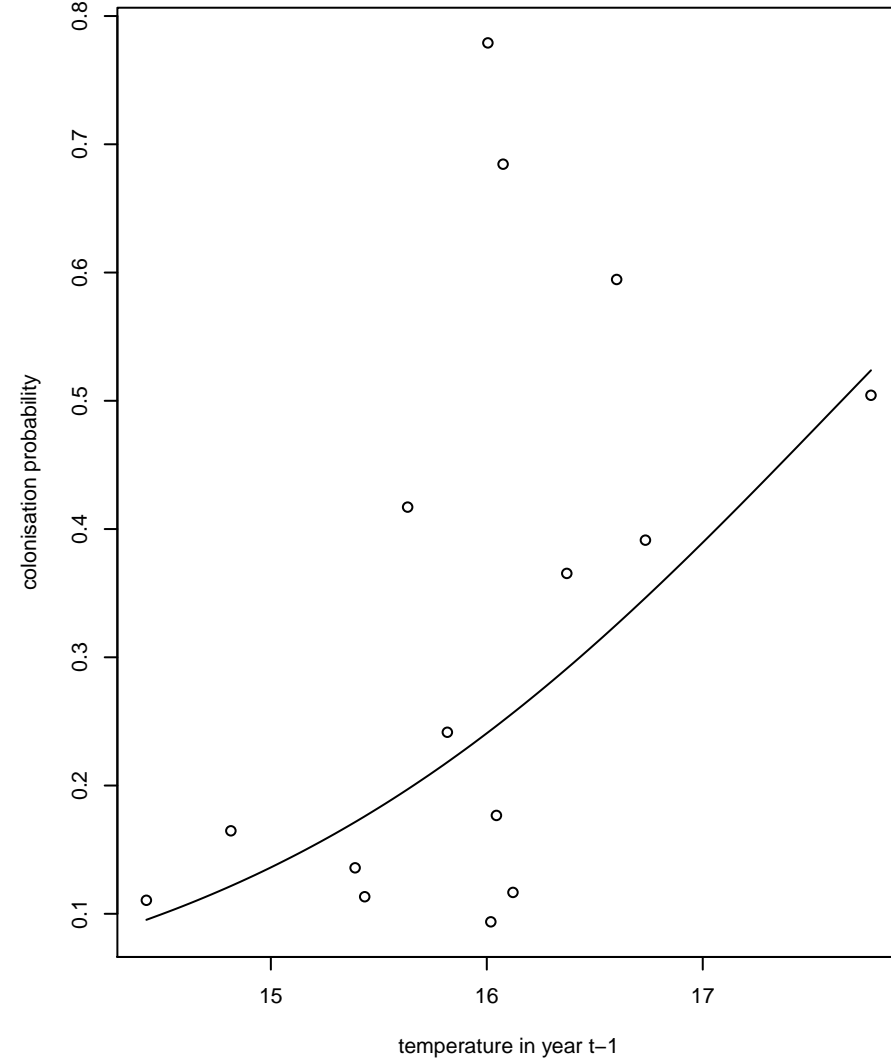

**Aeshna isoceles**

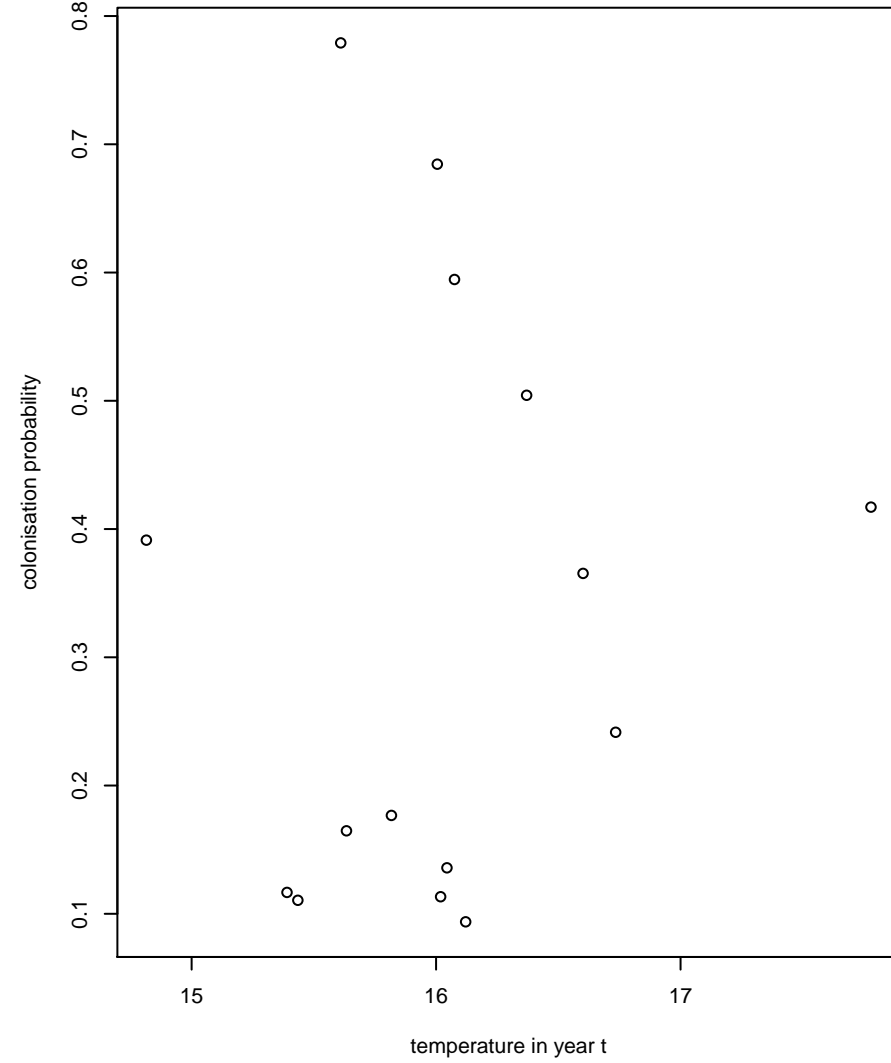

**Leucorrhinia dubia**

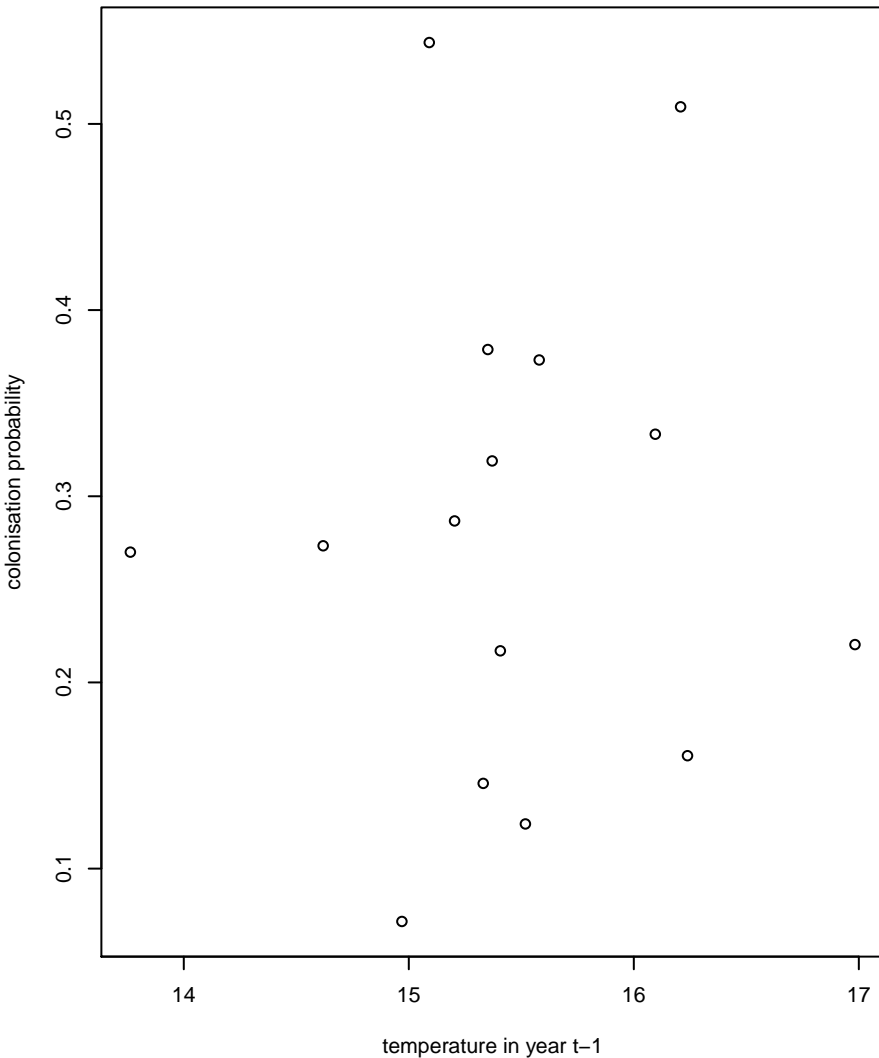

**Leucorrhinia dubia**

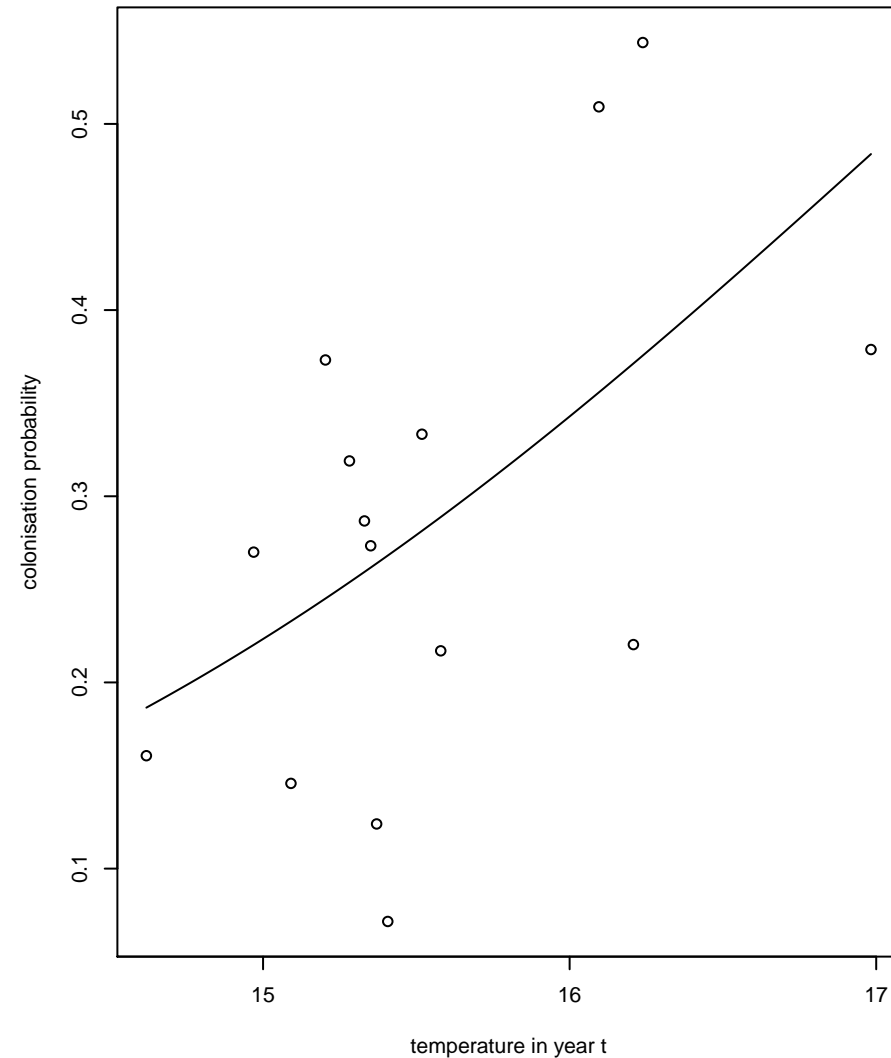

**Aeshna grandis**

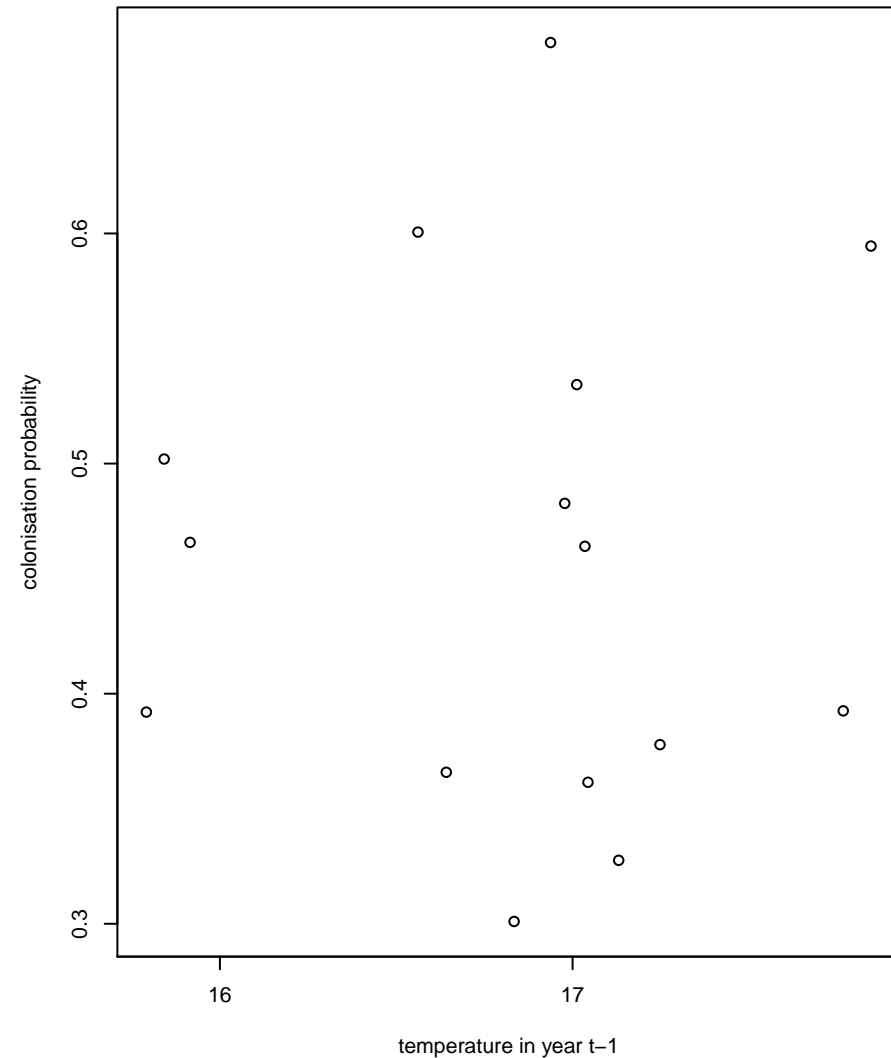

**Aeshna grandis**

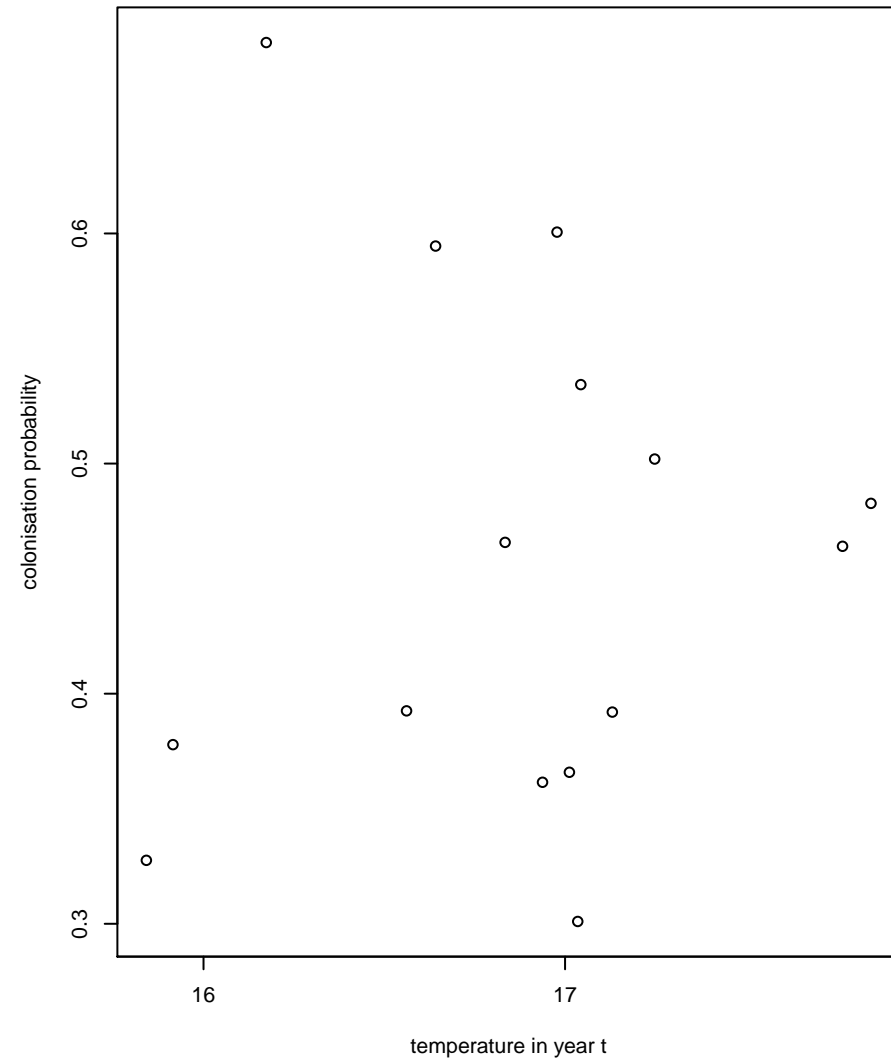

**Aeshna cyanea**

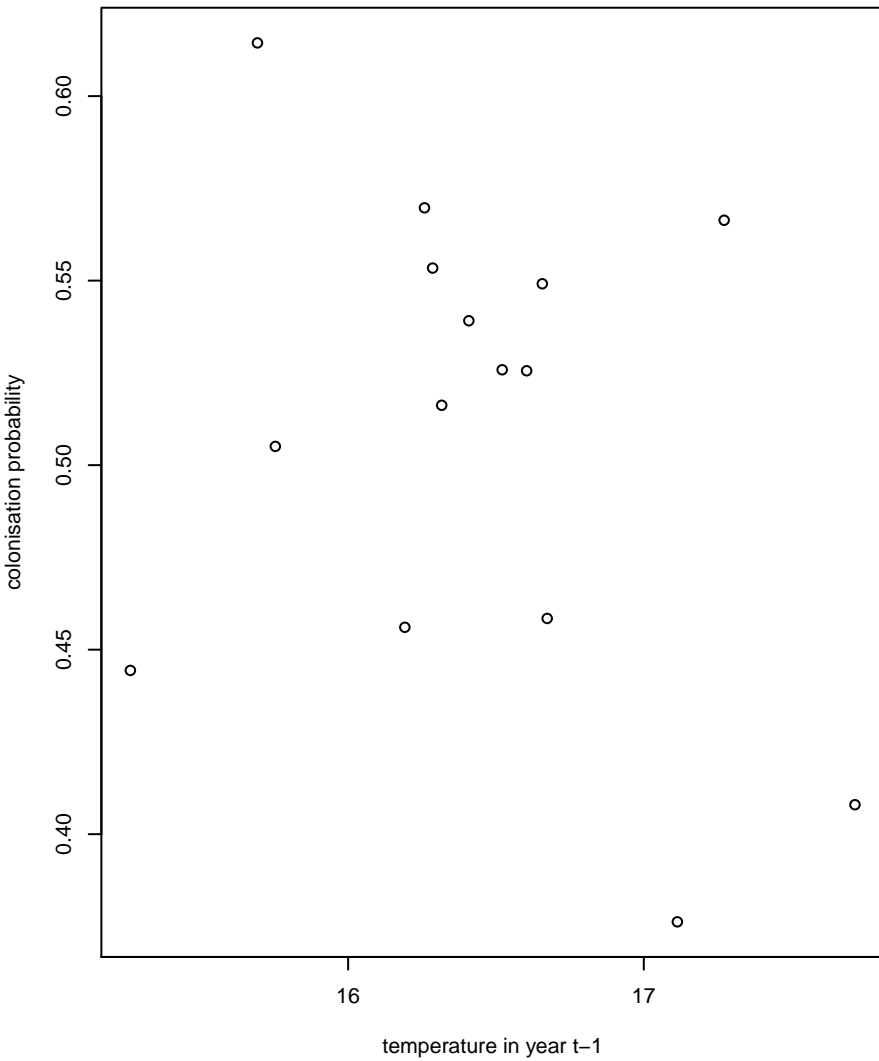

**Aeshna cyanea**

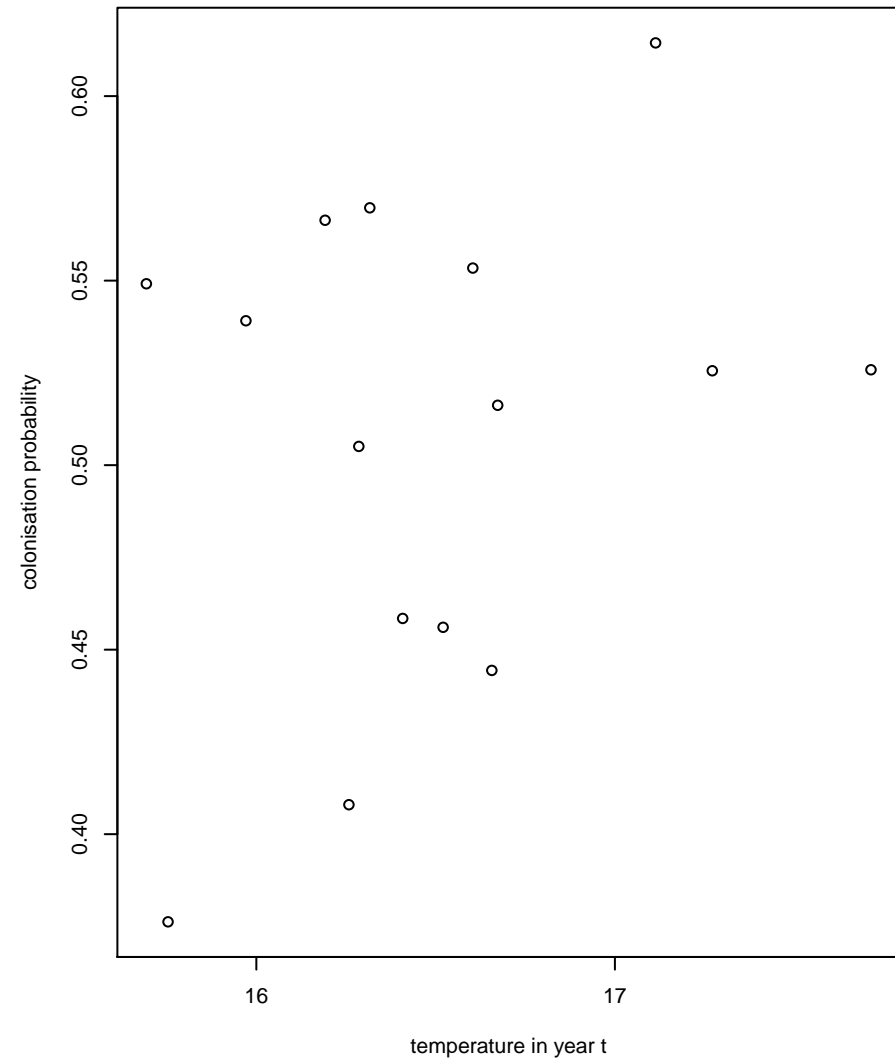

**Lestes virens**

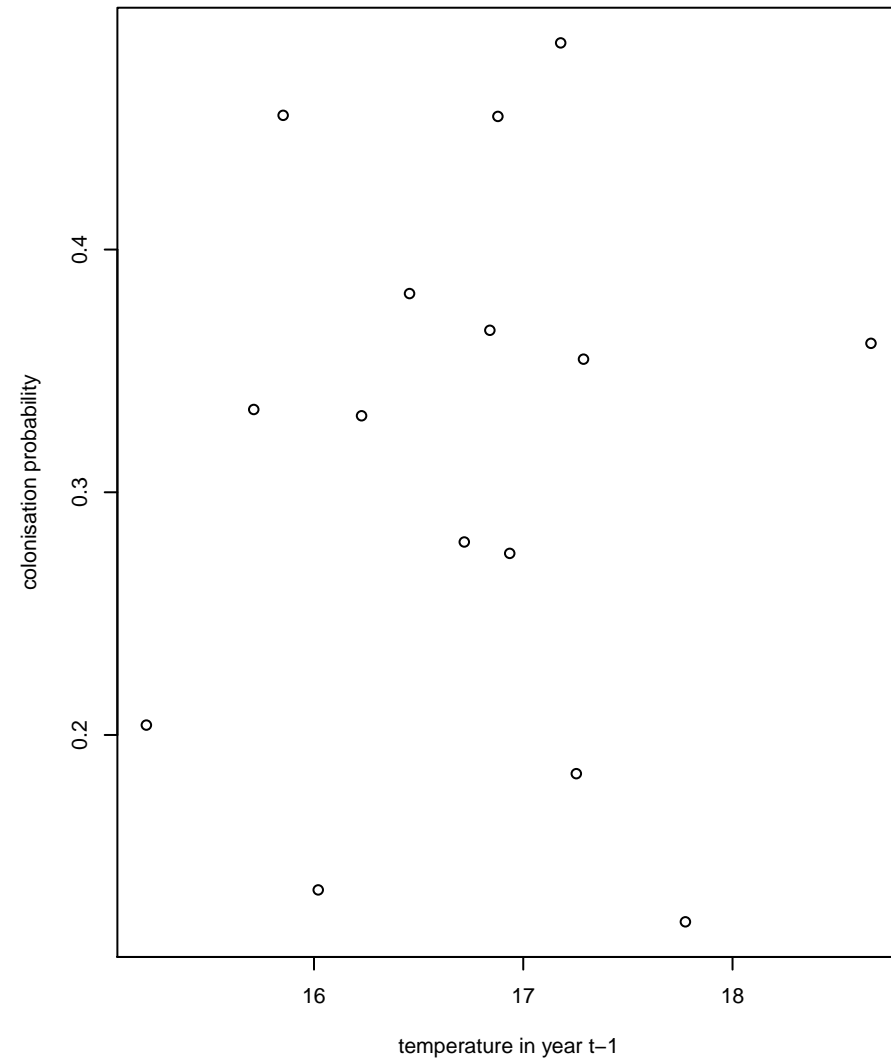

**Lestes virens**

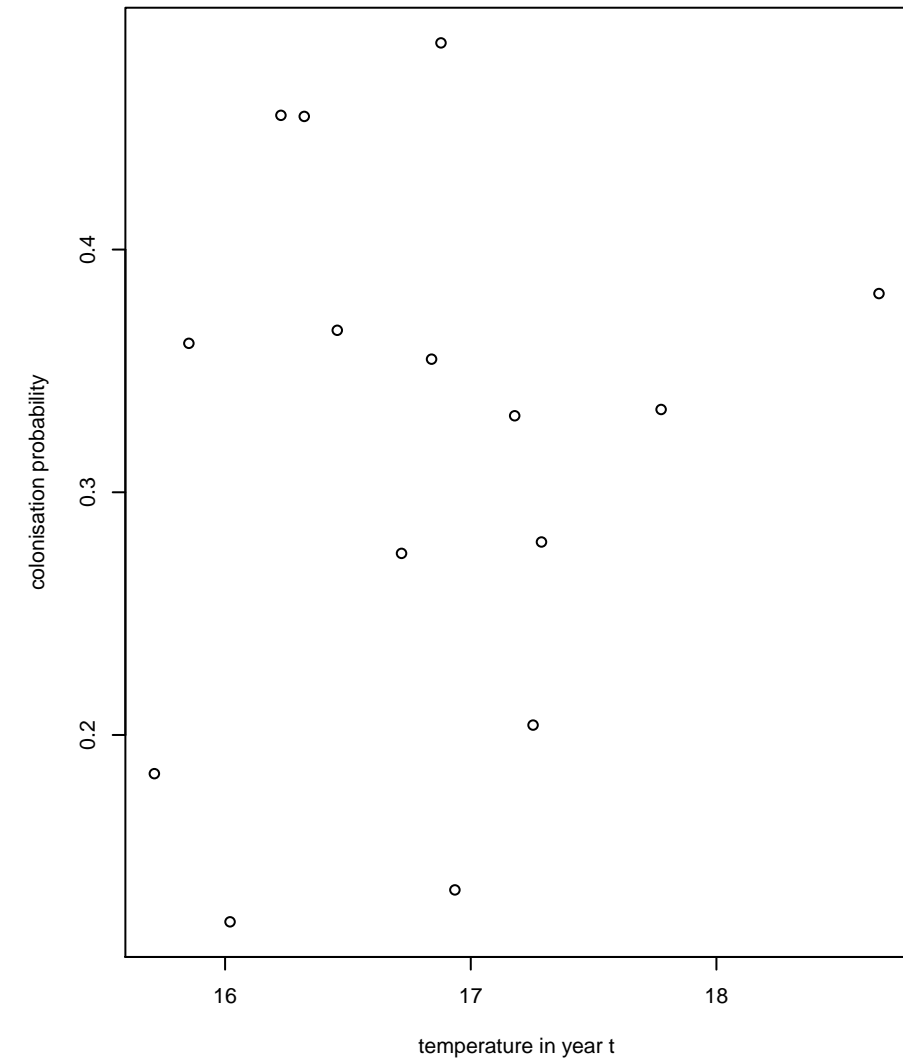

**Libellula depressa**

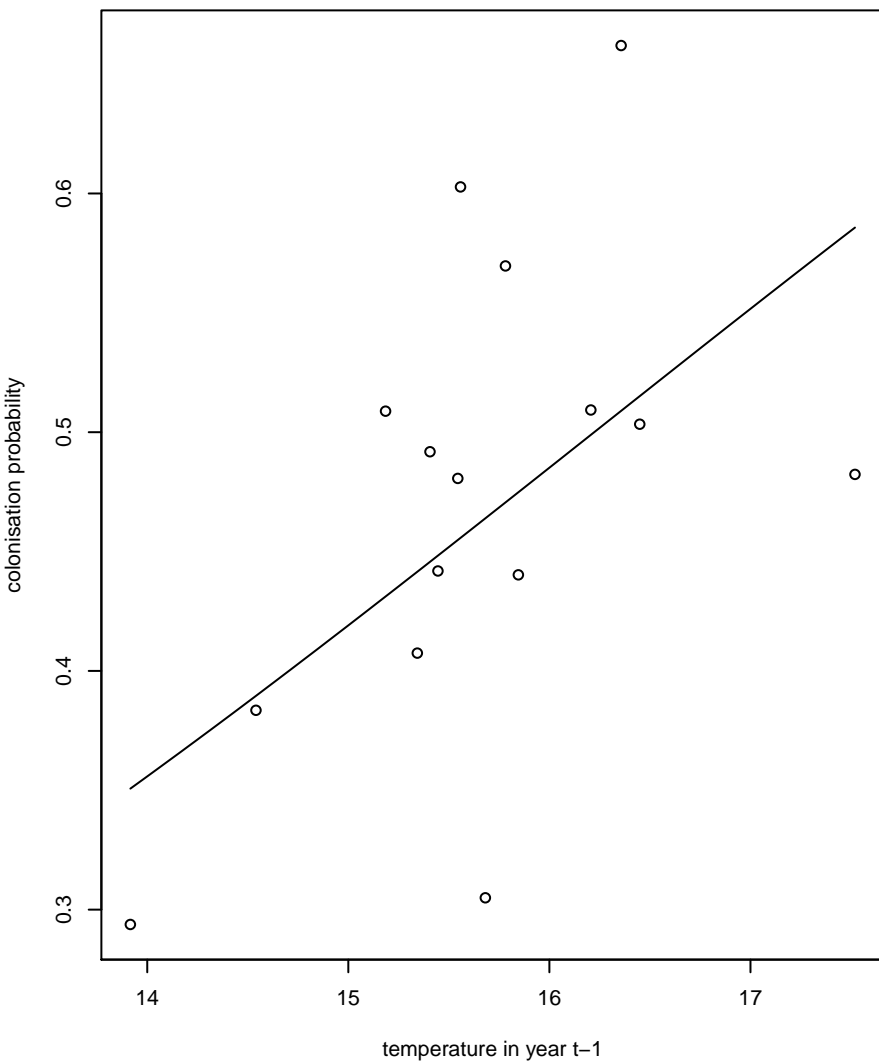

**Libellula depressa**

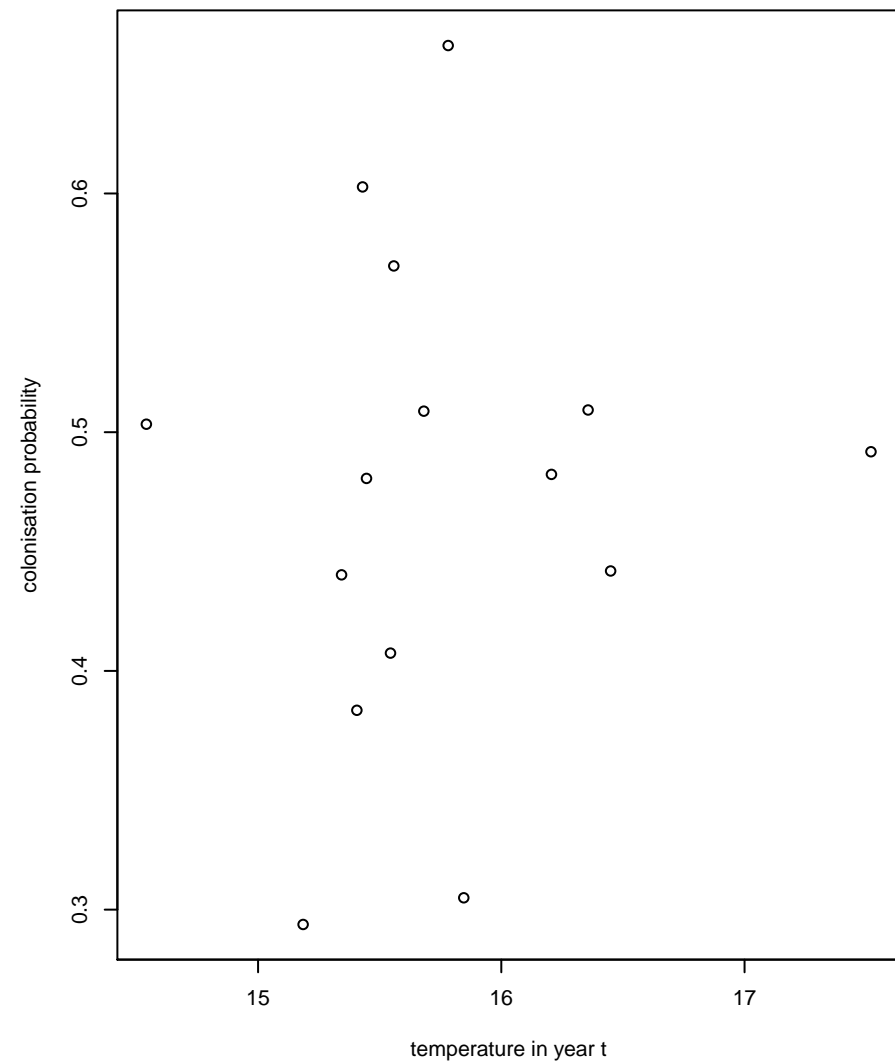

**Sympetrum striolatum**

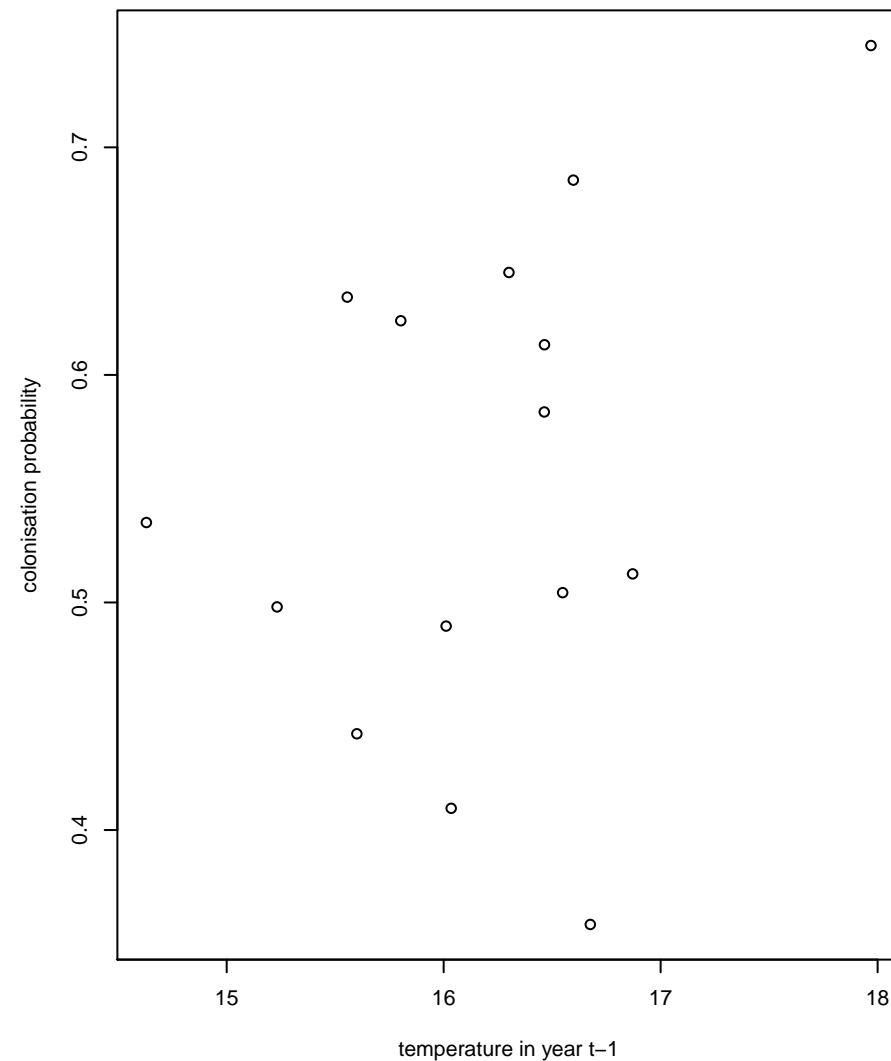

**Sympetrum striolatum**

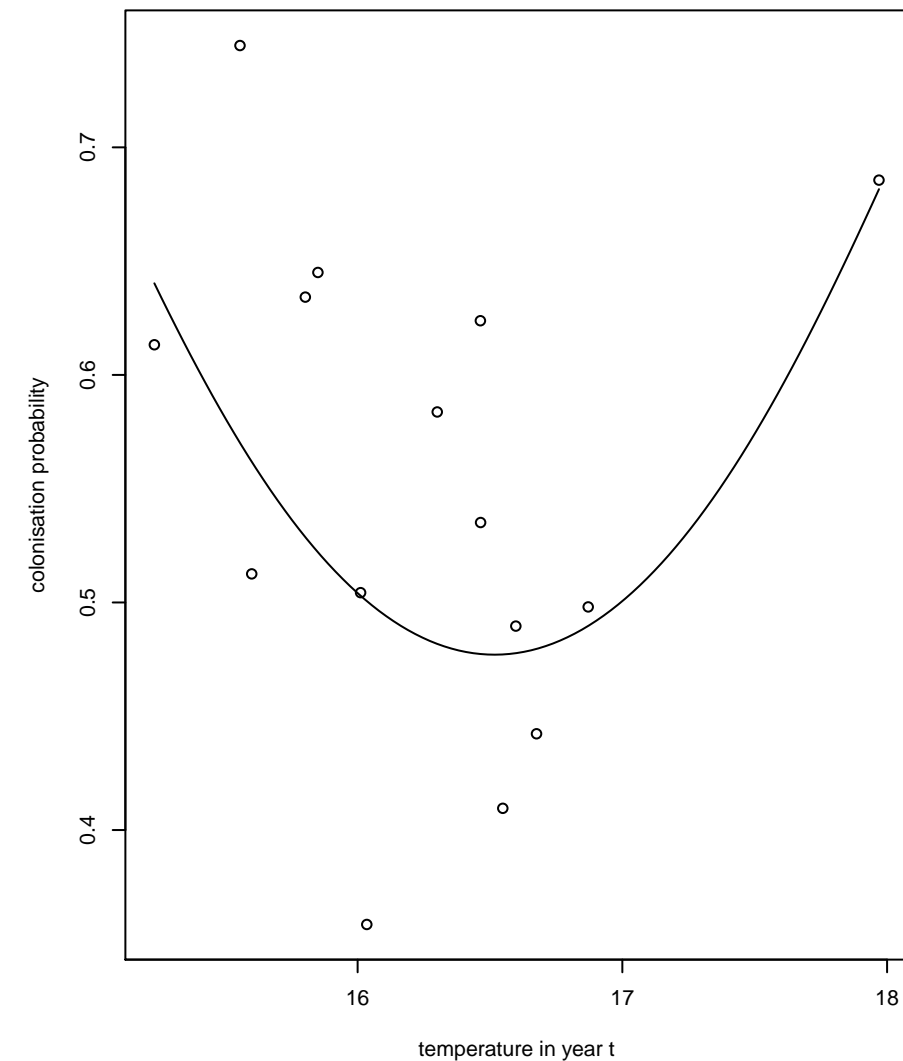

**Gomphus vulgatissimus**

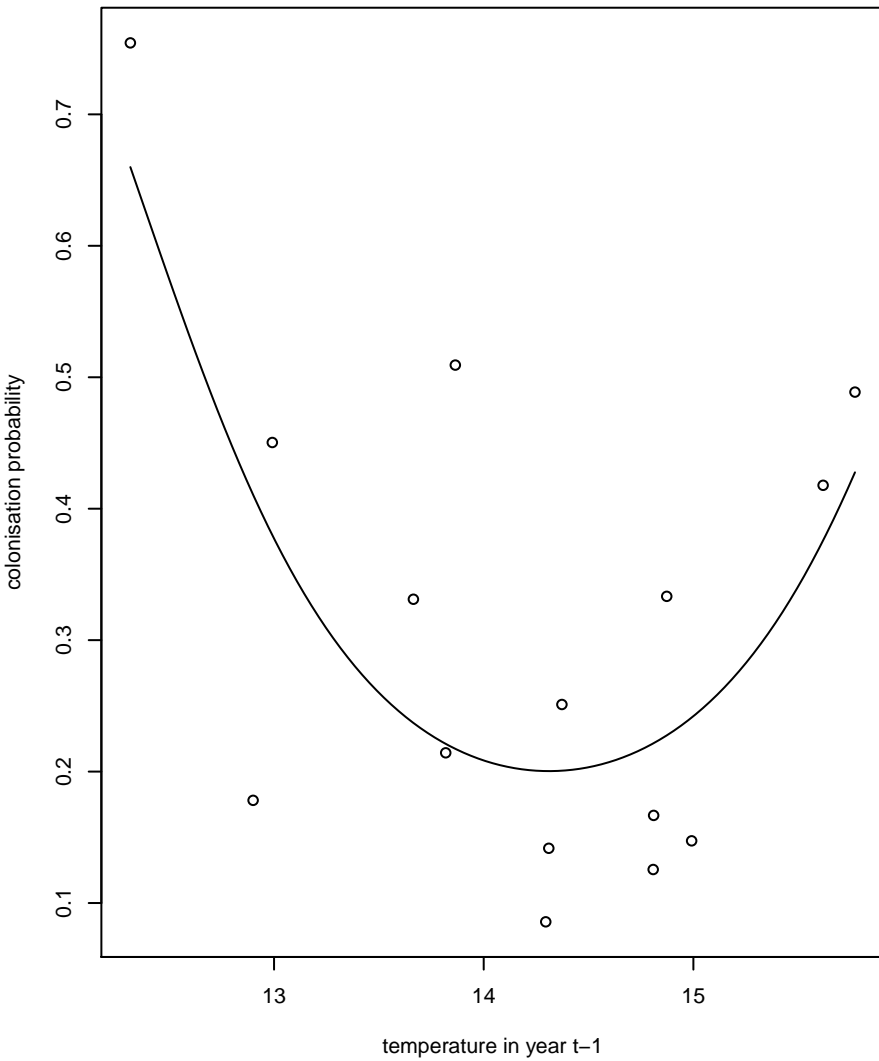

**Gomphus vulgatissimus**

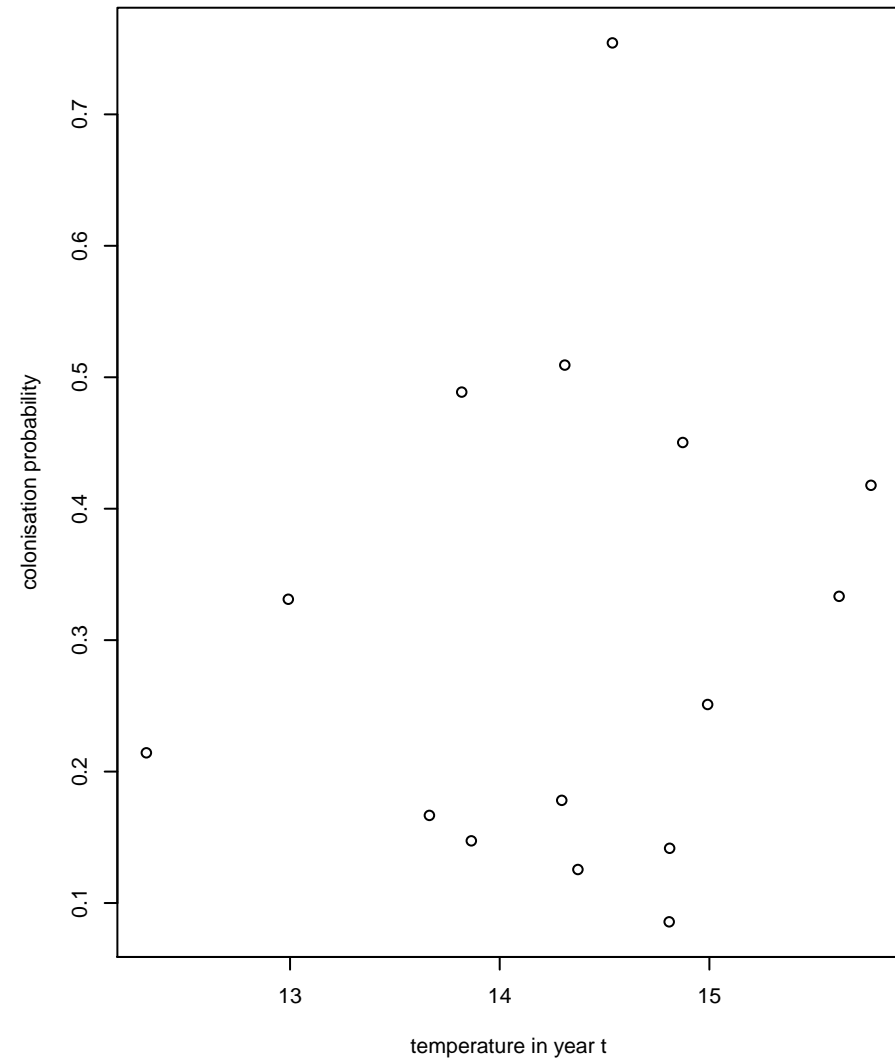

**Cordulia aenea**

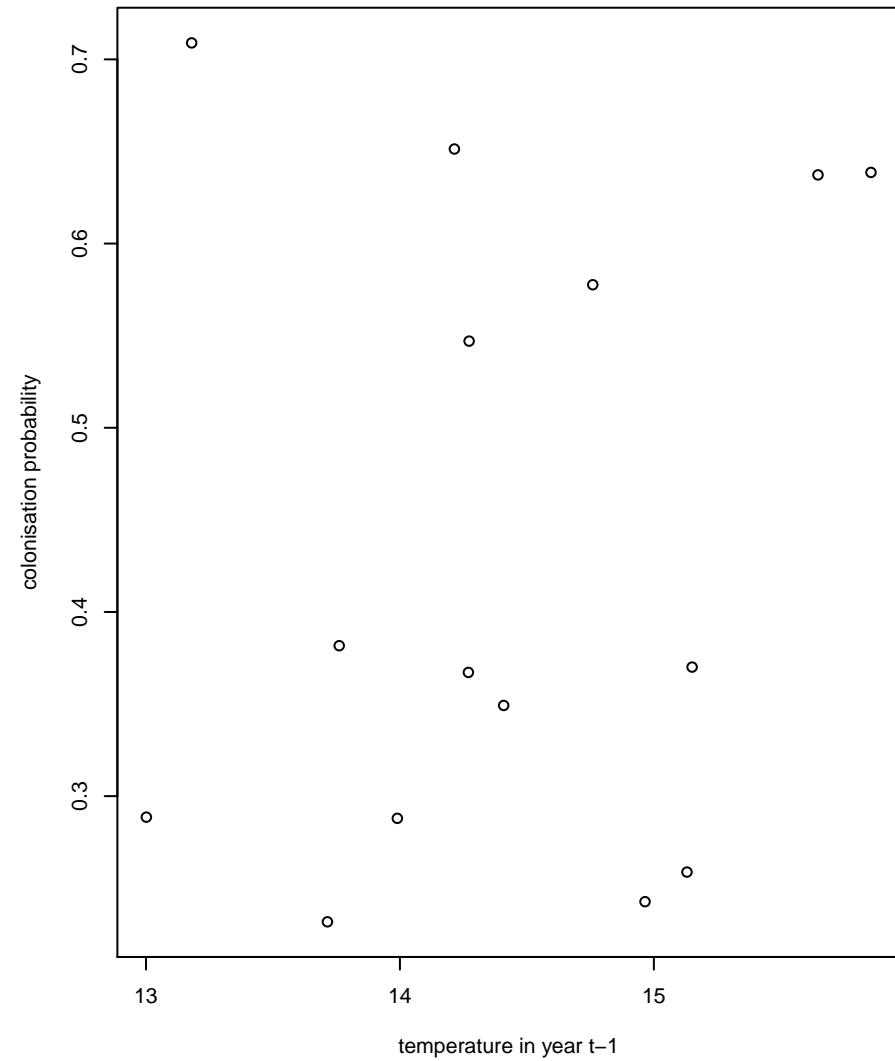

**Cordulia aenea**

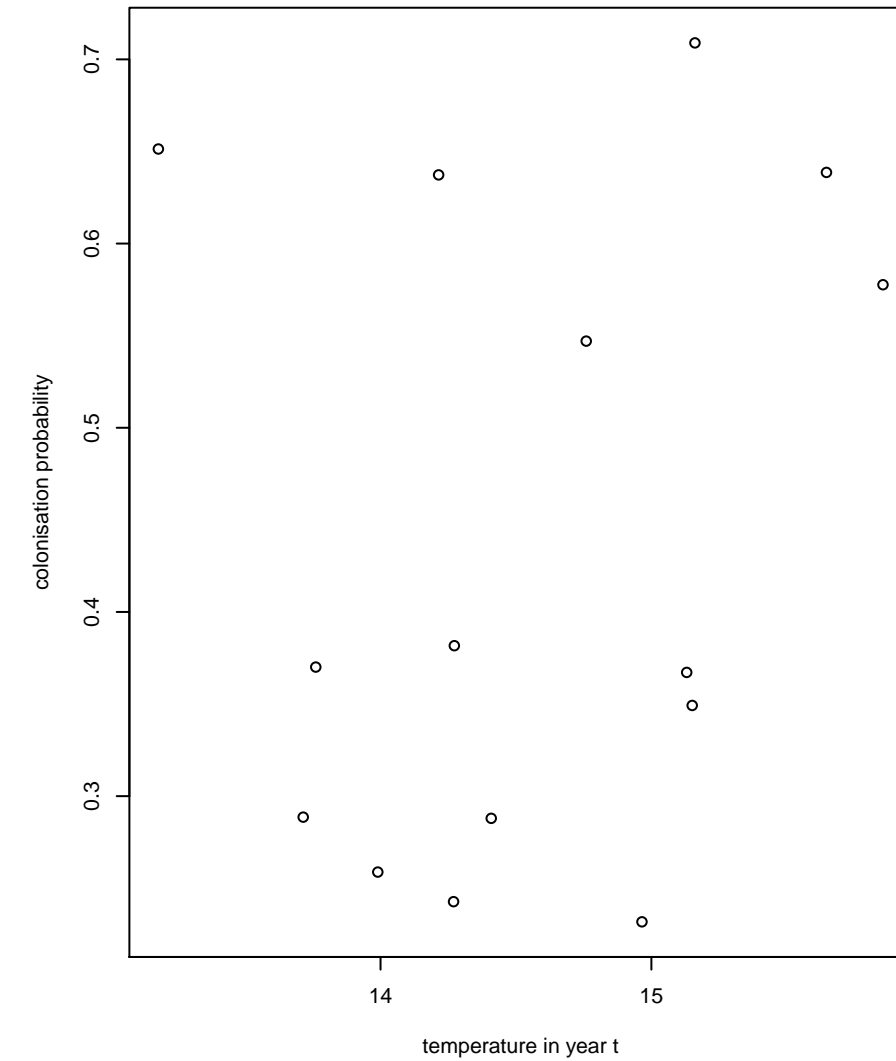

**Aeshna viridis**

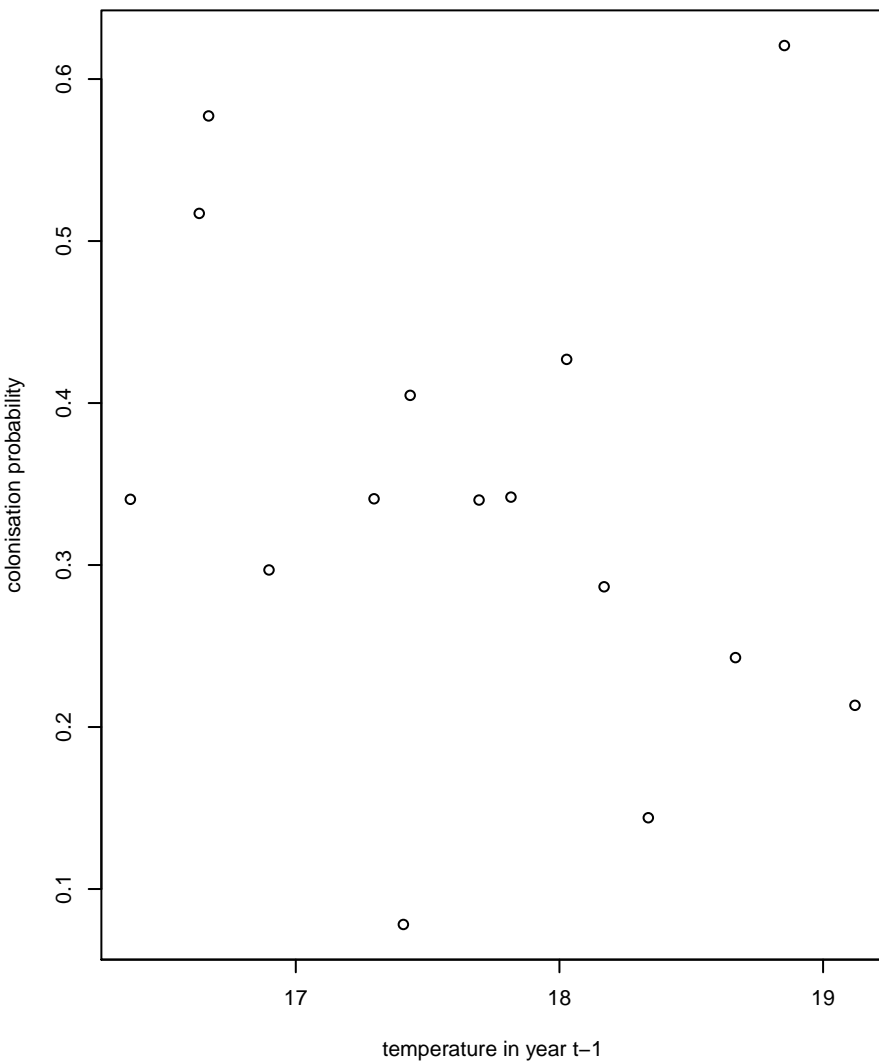

**Aeshna viridis**

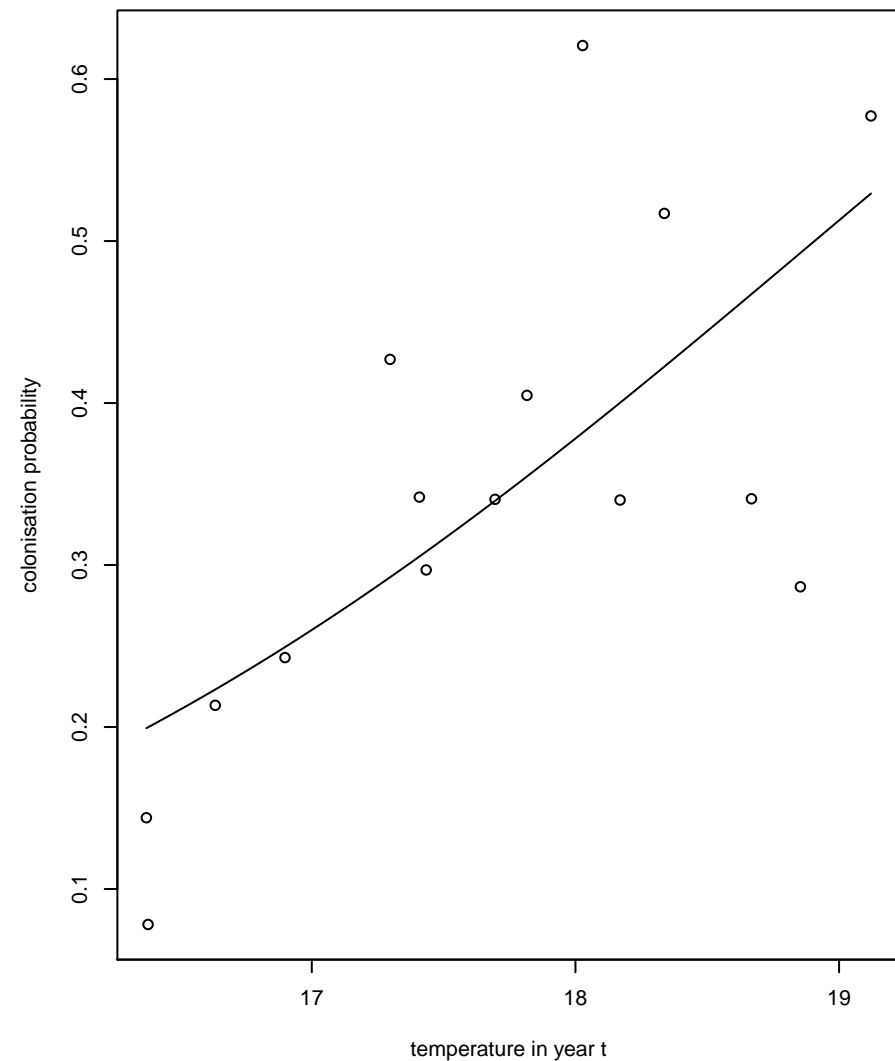

**Sympetrum flaveolum**

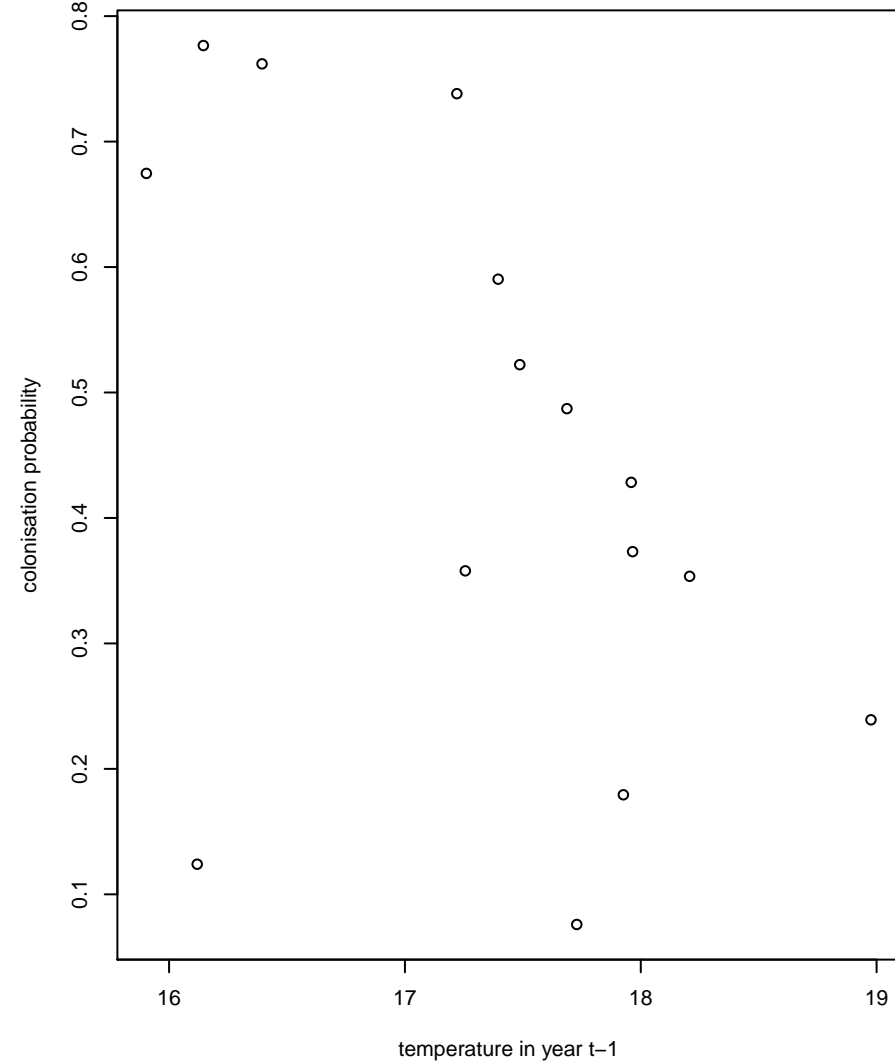

**Sympetrum flaveolum**

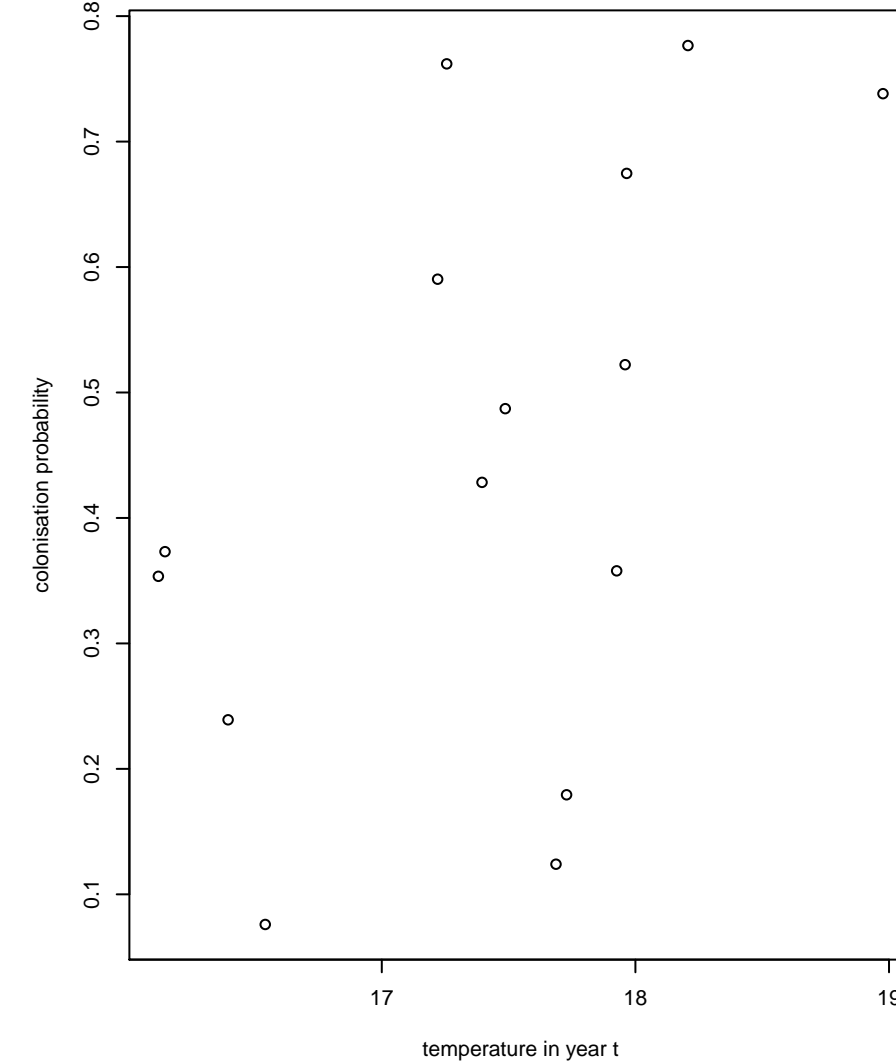

**Coenagrion lunulatum**

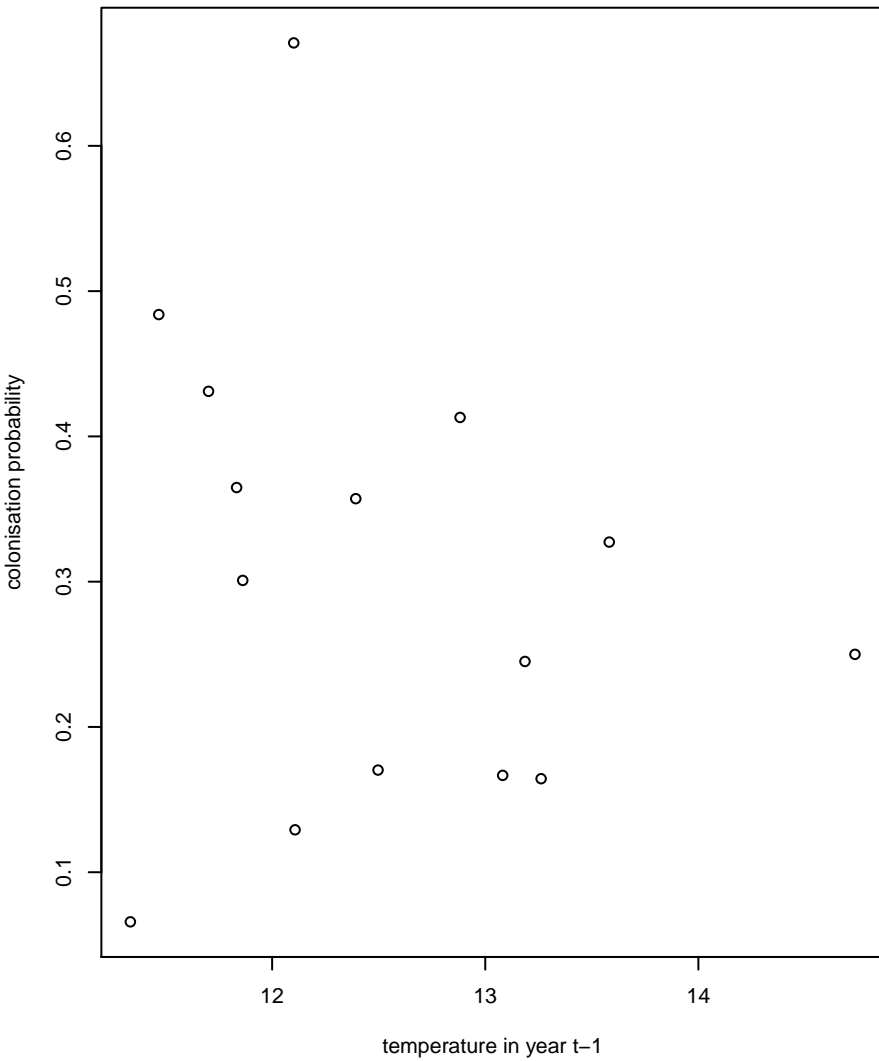

**Coenagrion lunulatum**

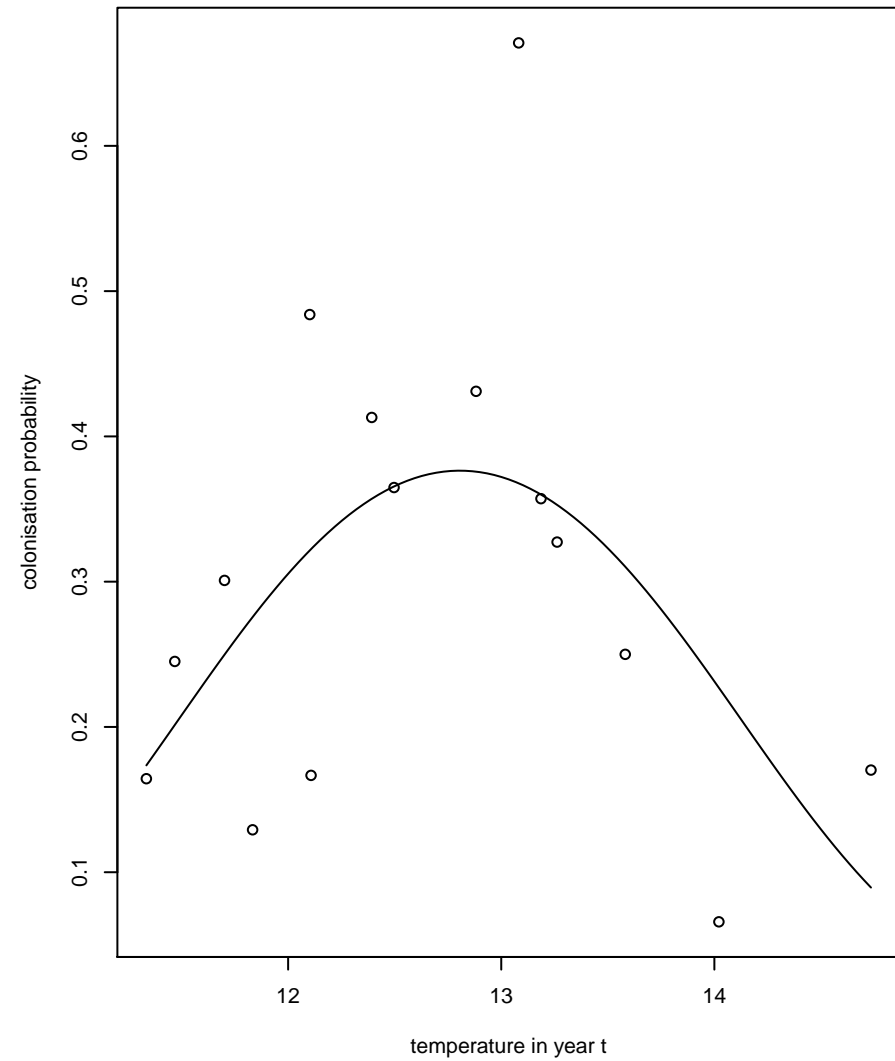

**Lestes dryas**

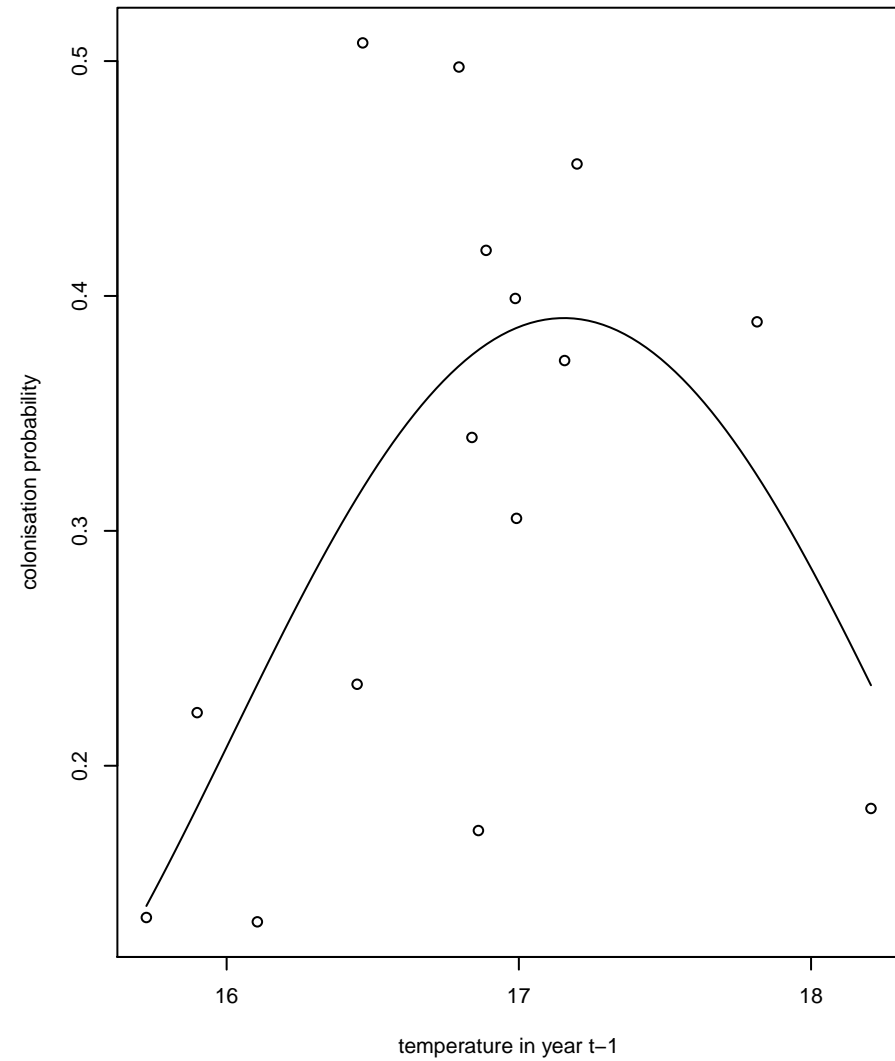

**Lestes dryas**

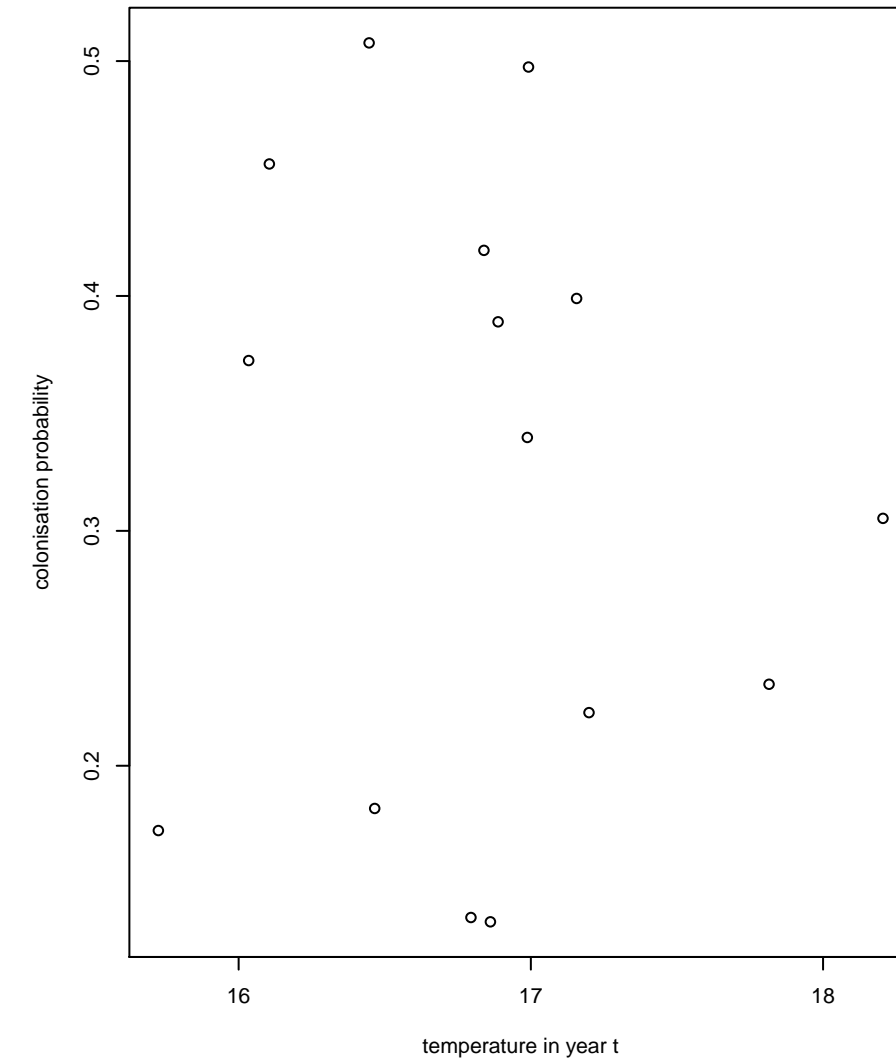

**Sympecma fusca**

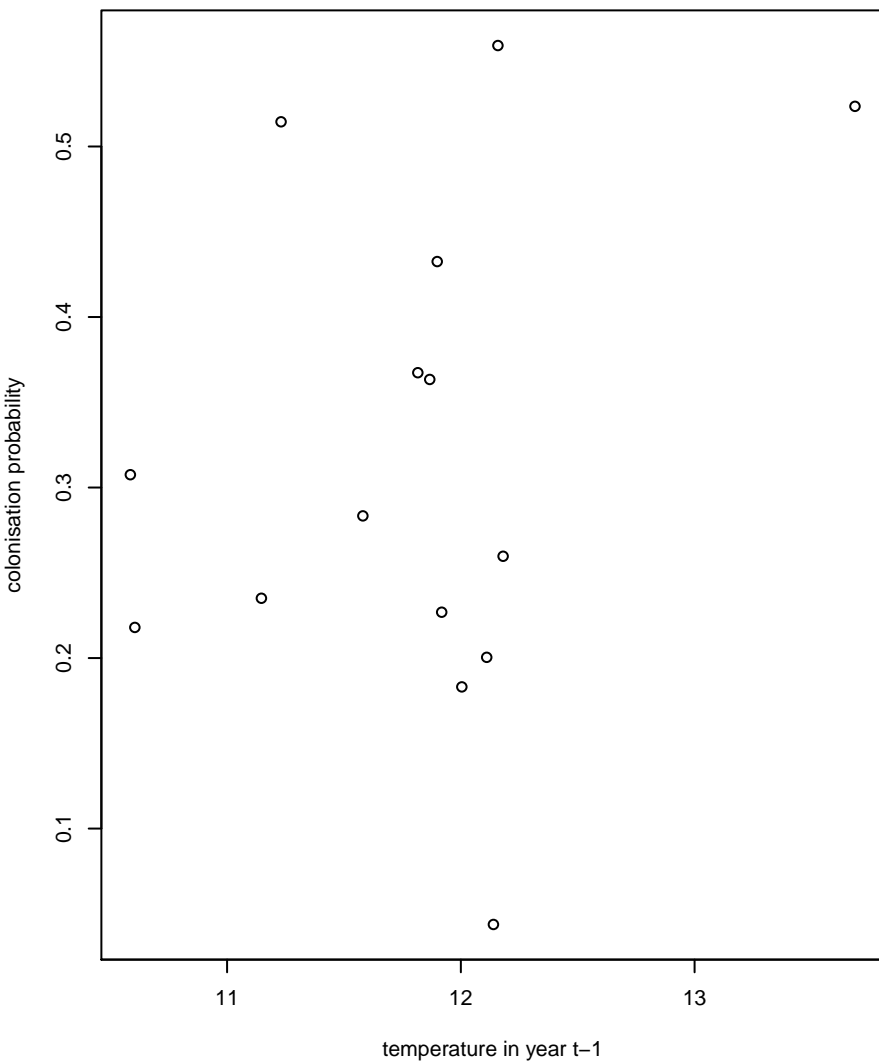

**Sympecma fusca**

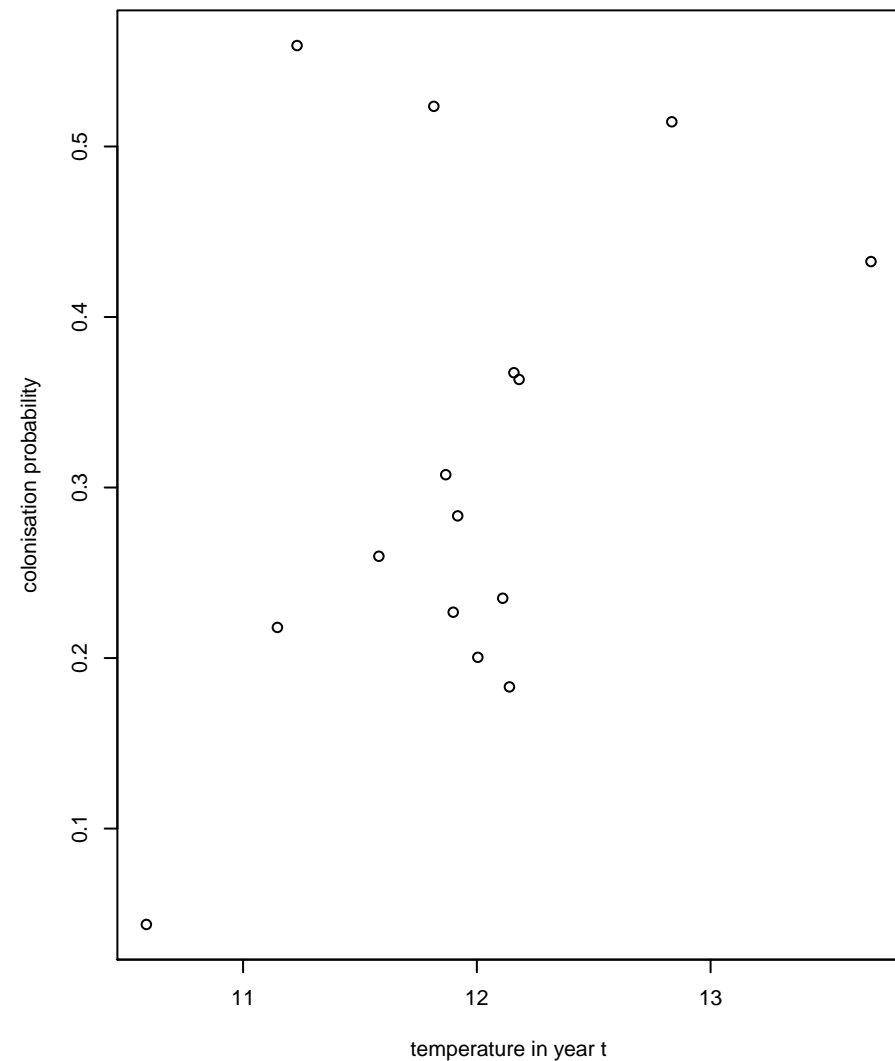

**Aeshna juncea**

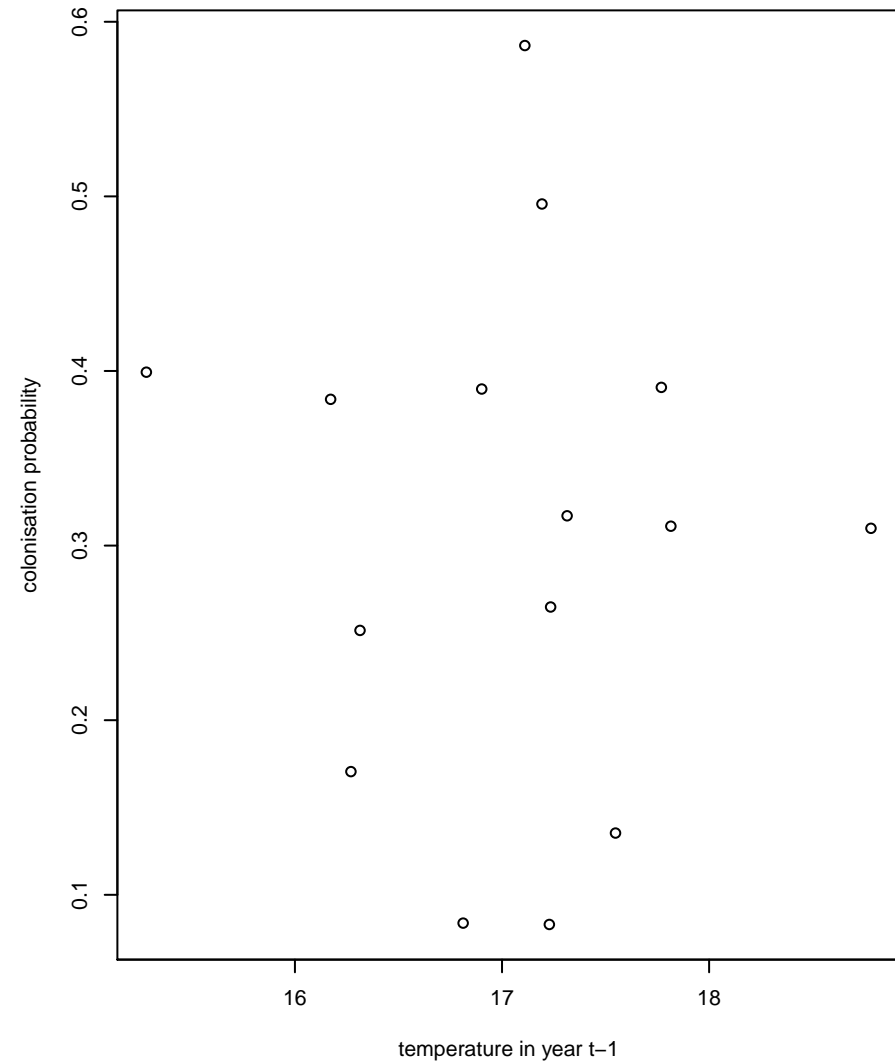

**Aeshna juncea**

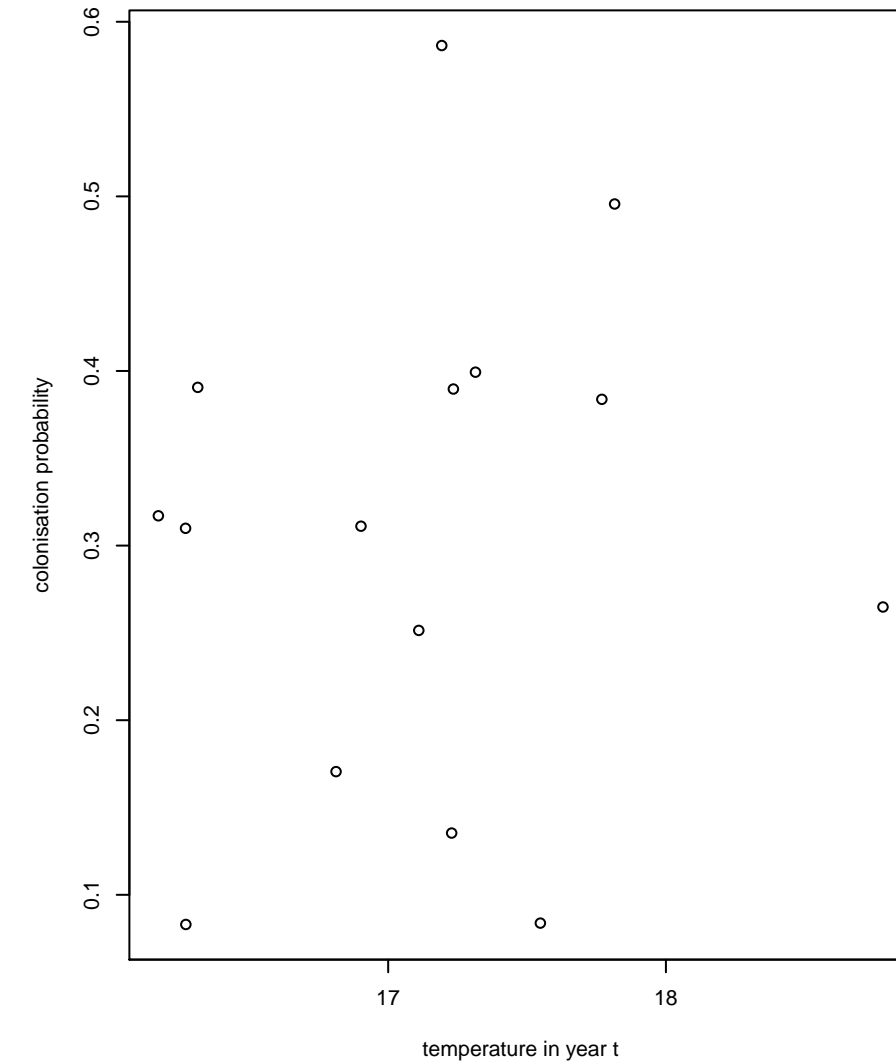

**Somatochlora metallica**

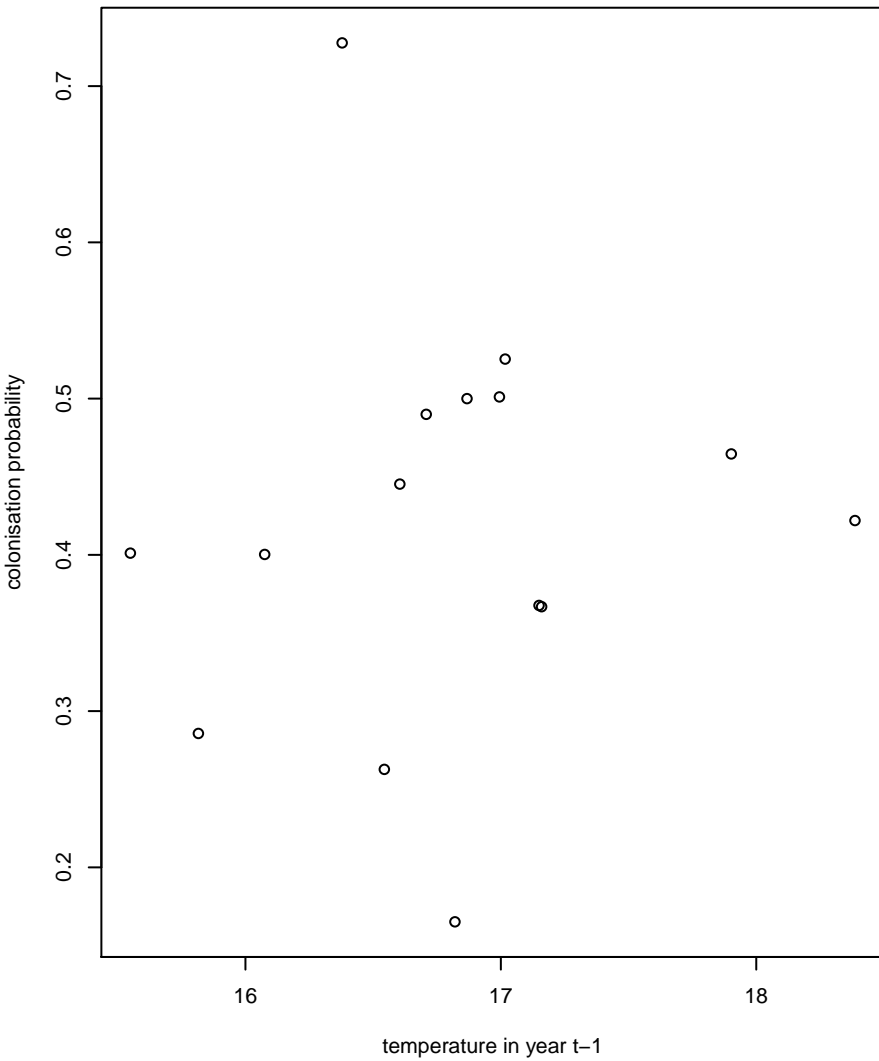

**Somatochlora metallica**

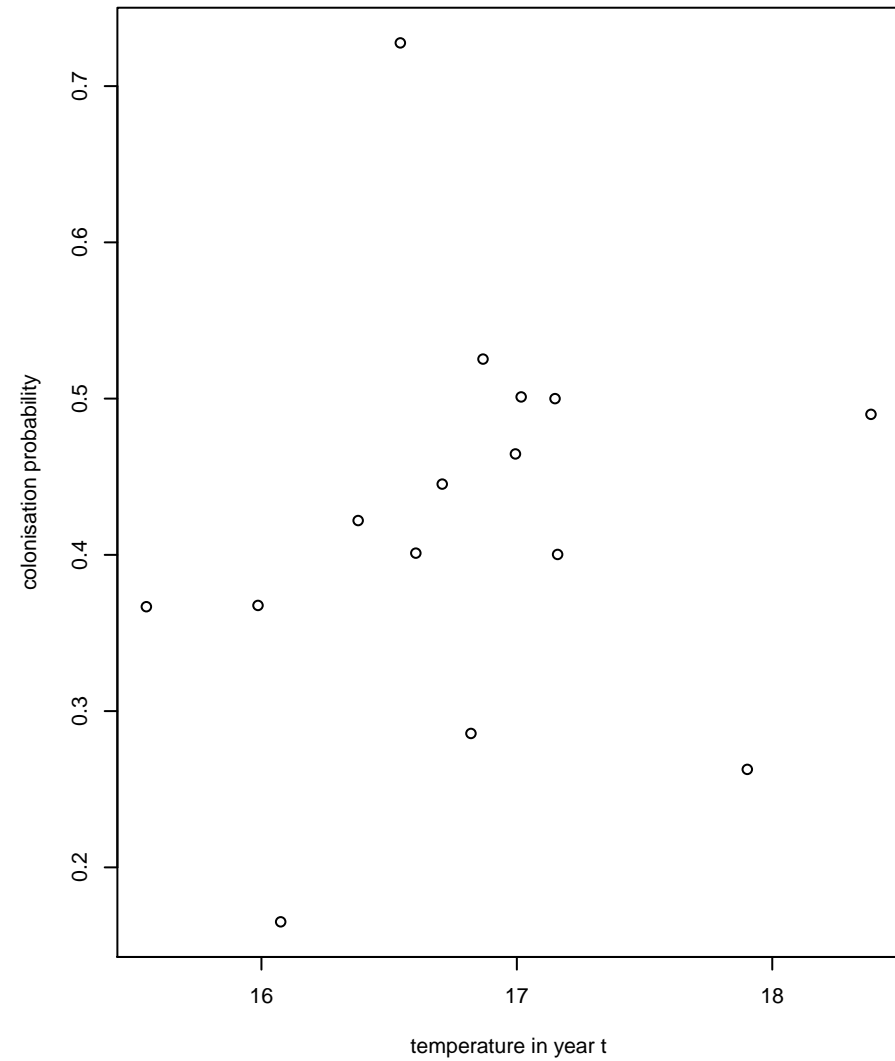

**Aeshna subarctica**

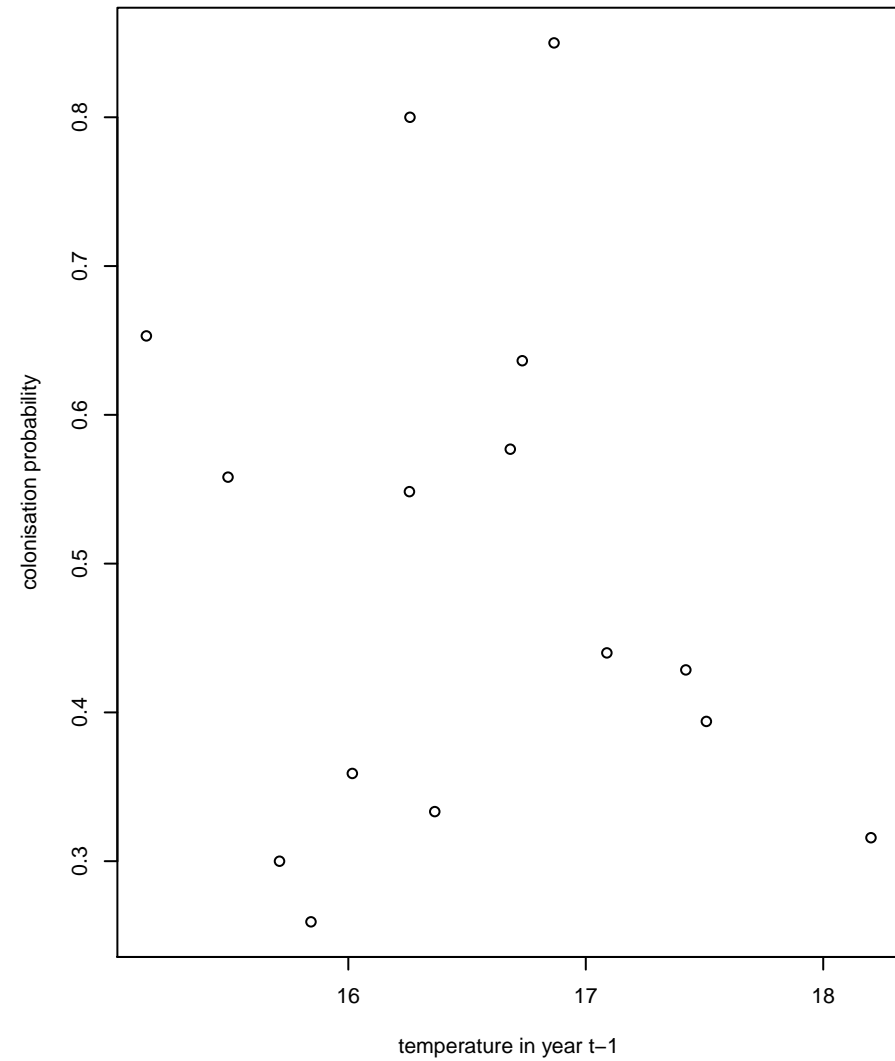

**Aeshna subarctica**

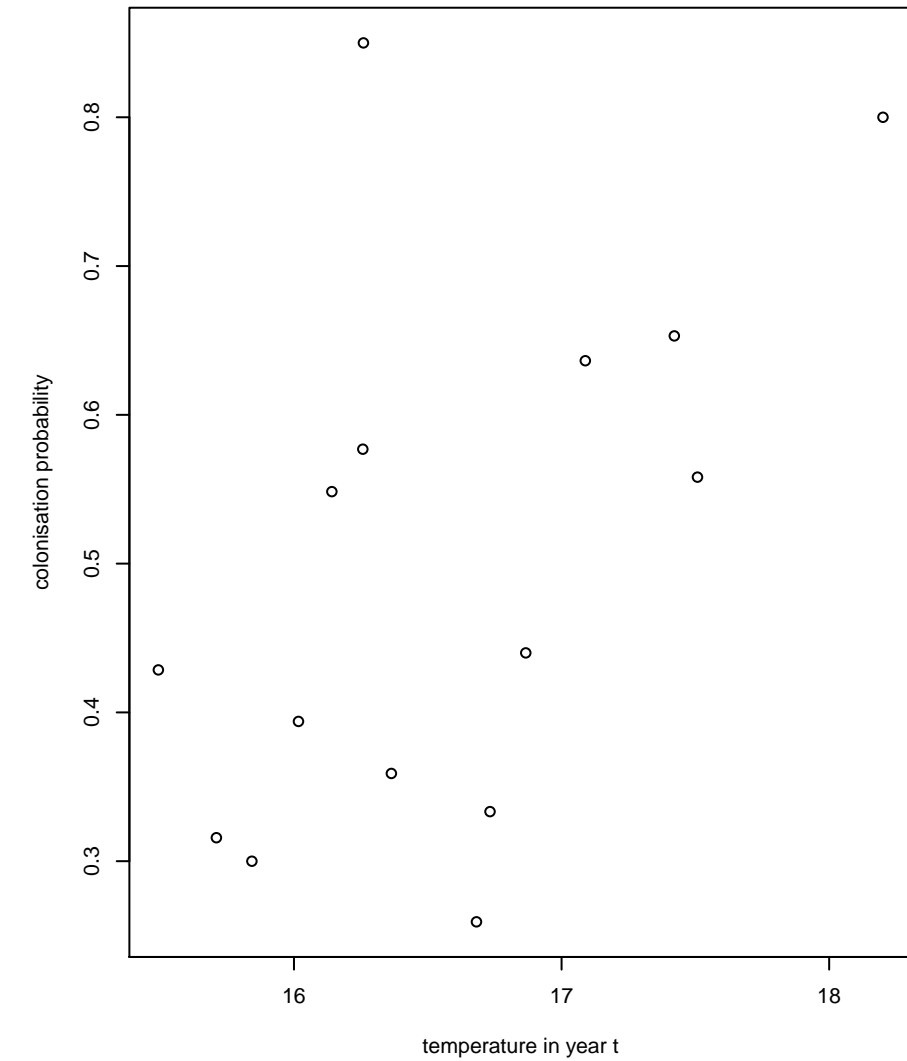

**Leucorrhinia pectoralis**

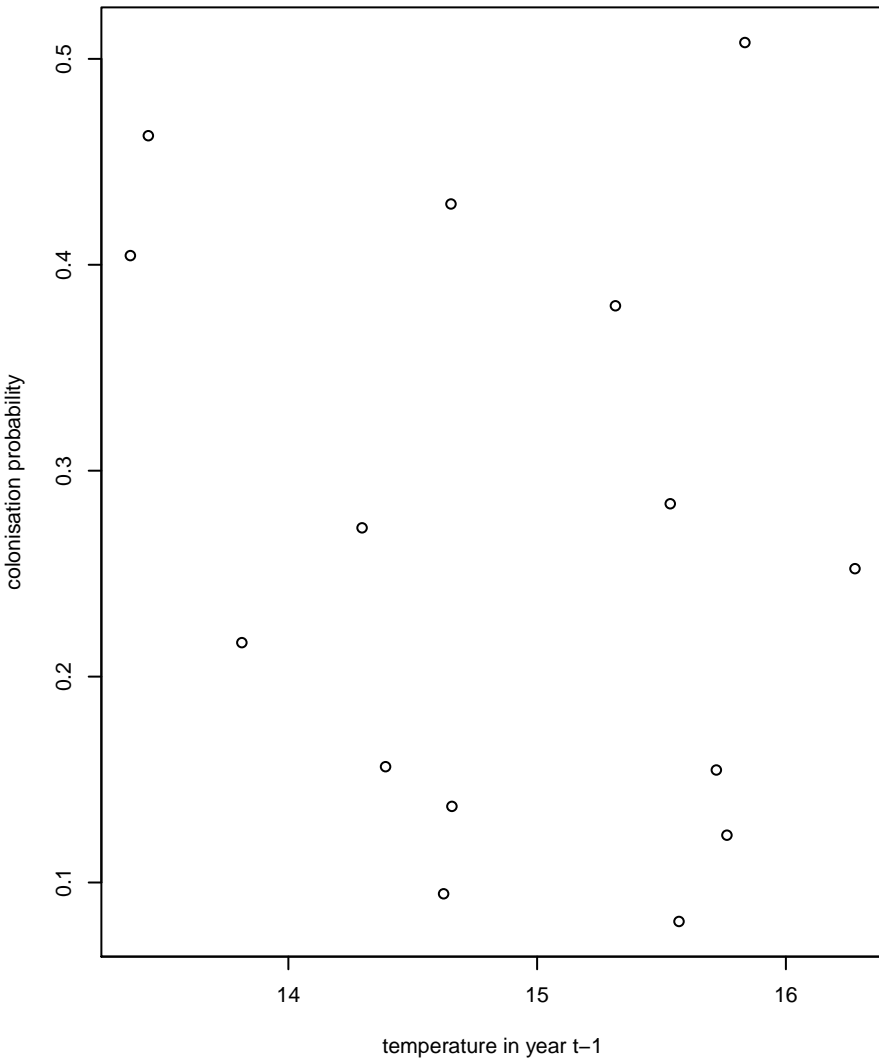

**Leucorrhinia pectoralis**

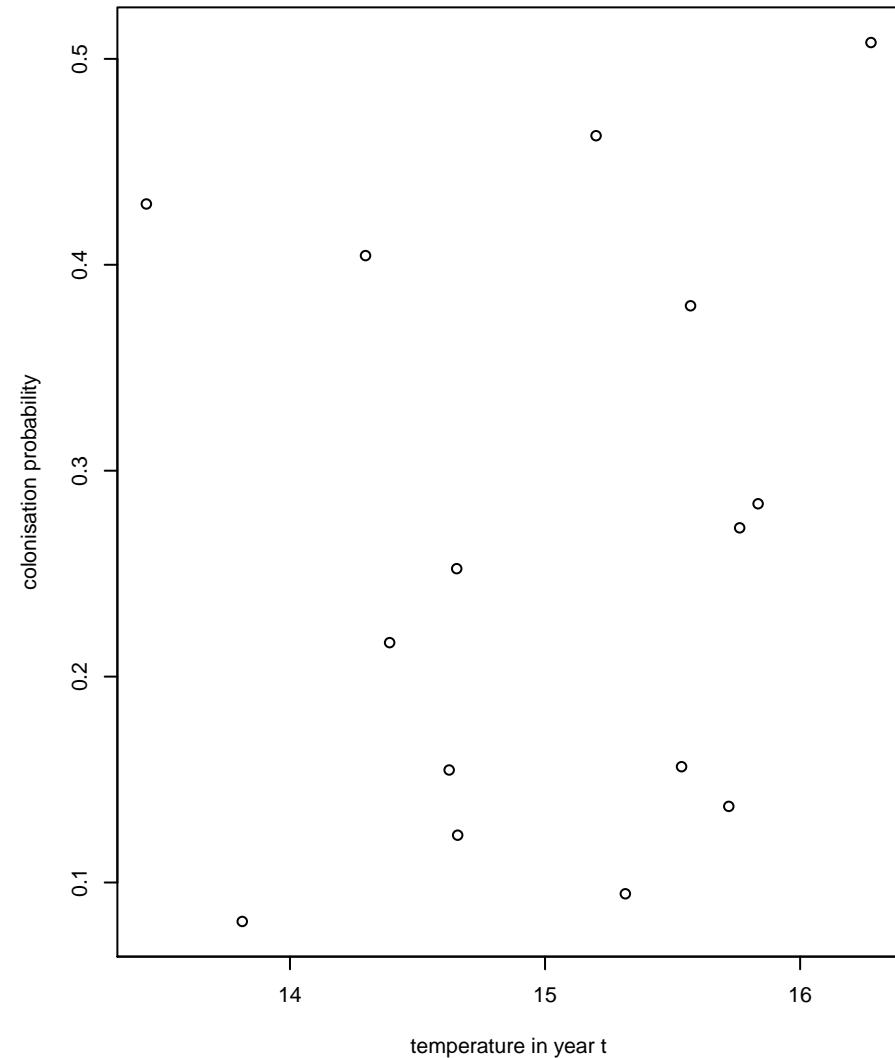

**Sympecma paedisca**

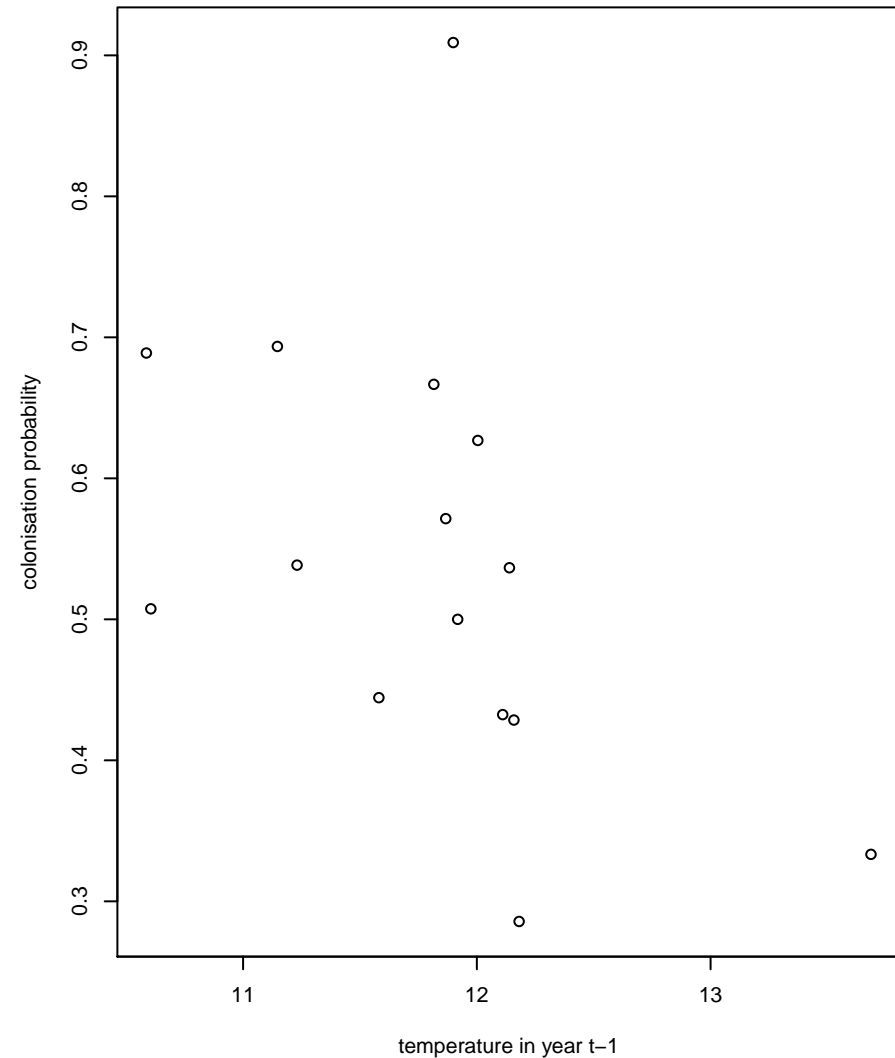

**Sympecma paedisca**

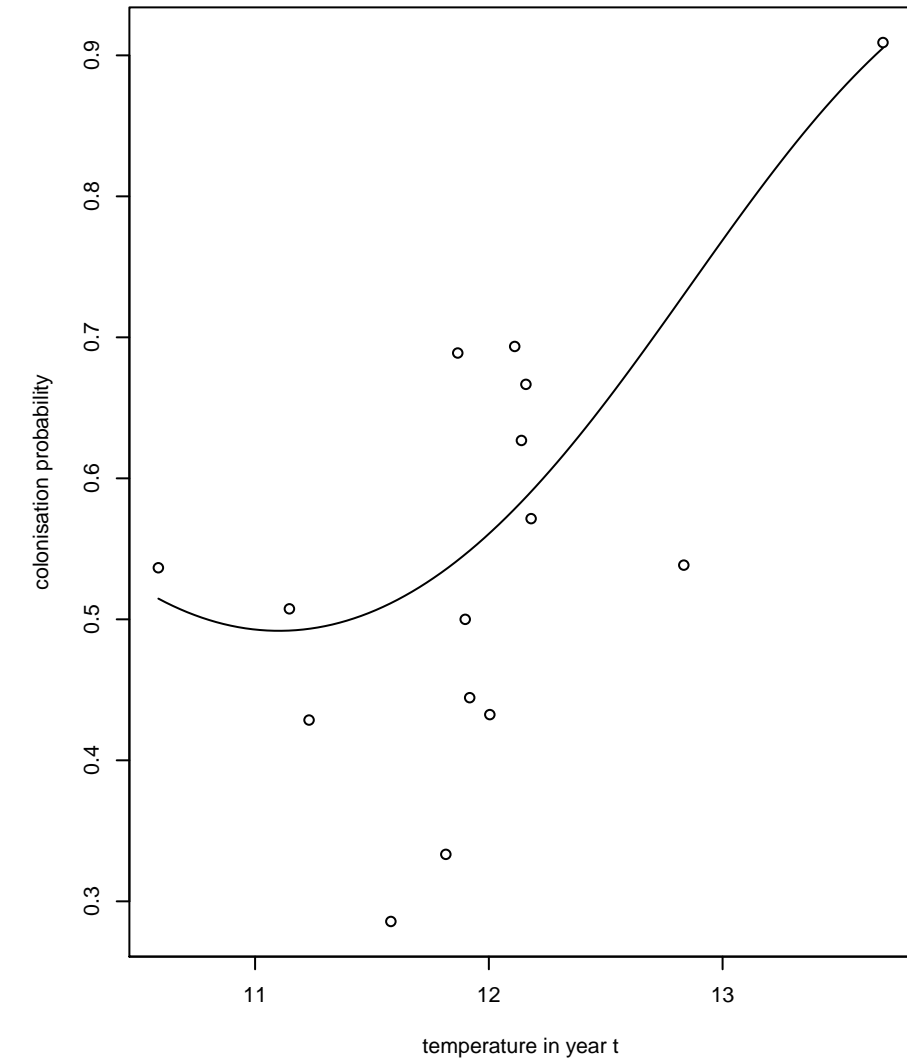

**Anax imperator**

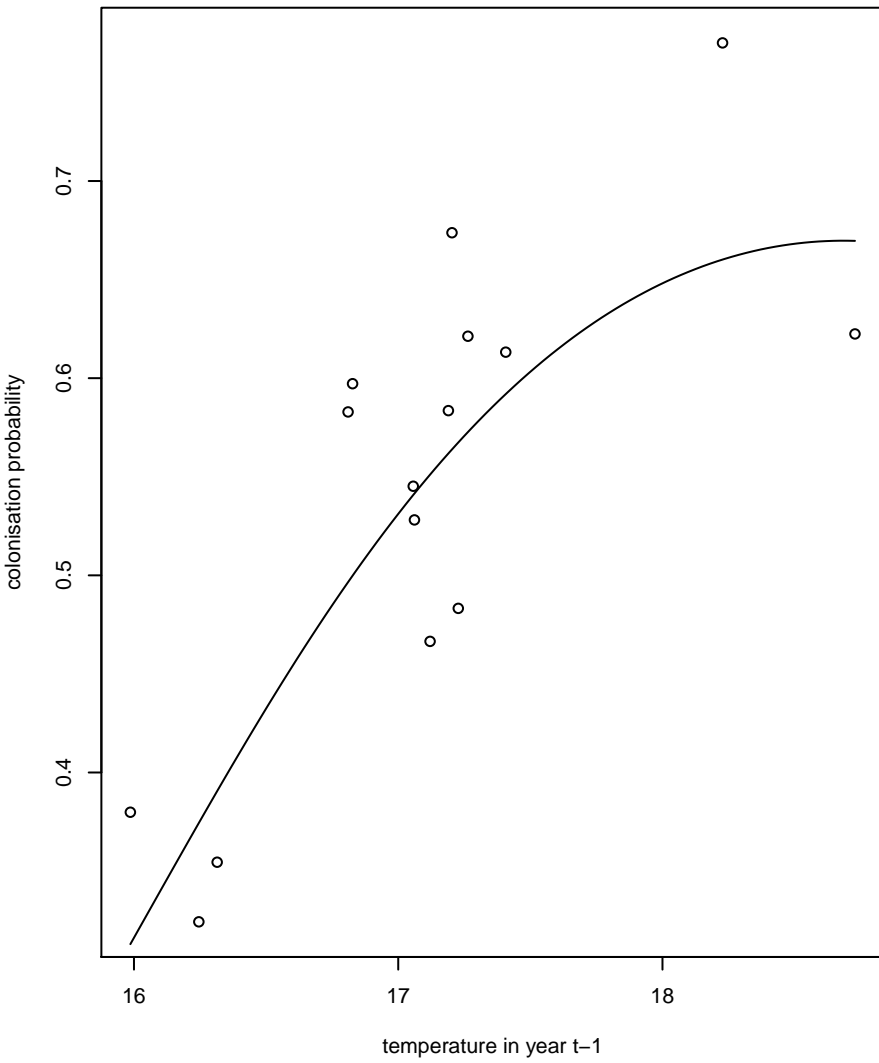

**Anax imperator**

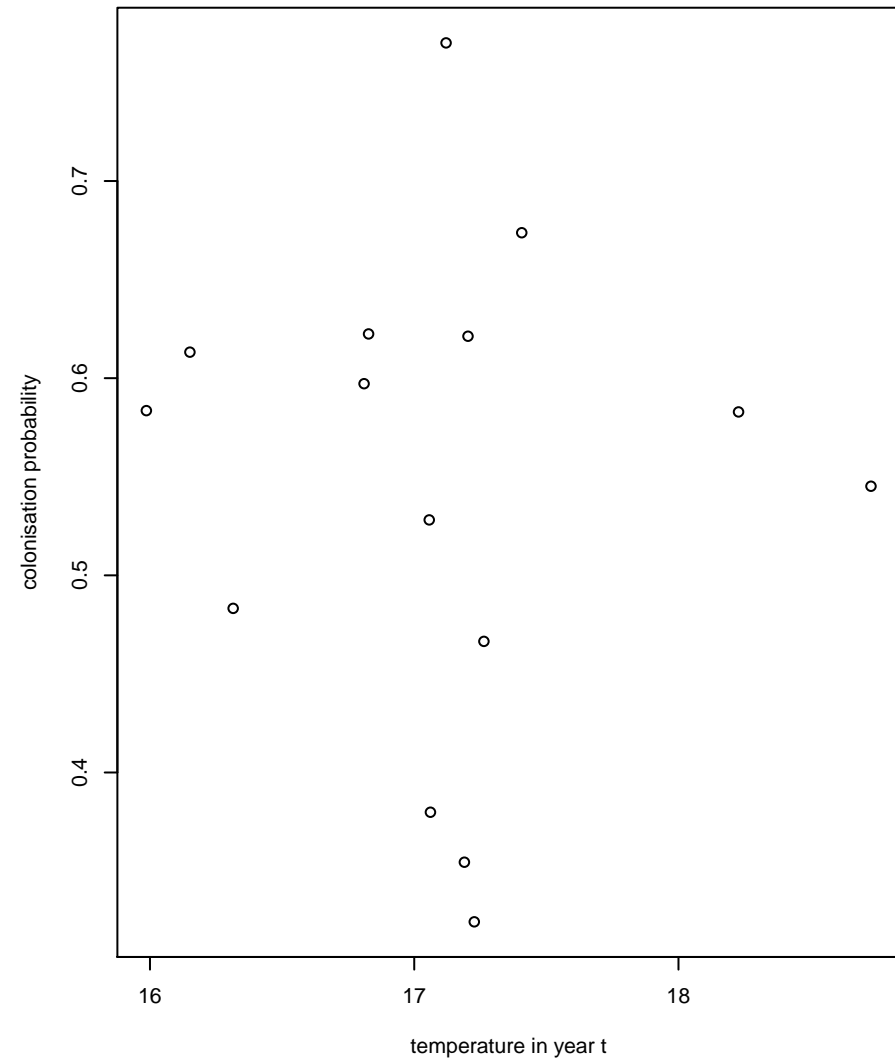

**Erythromma viridulum**

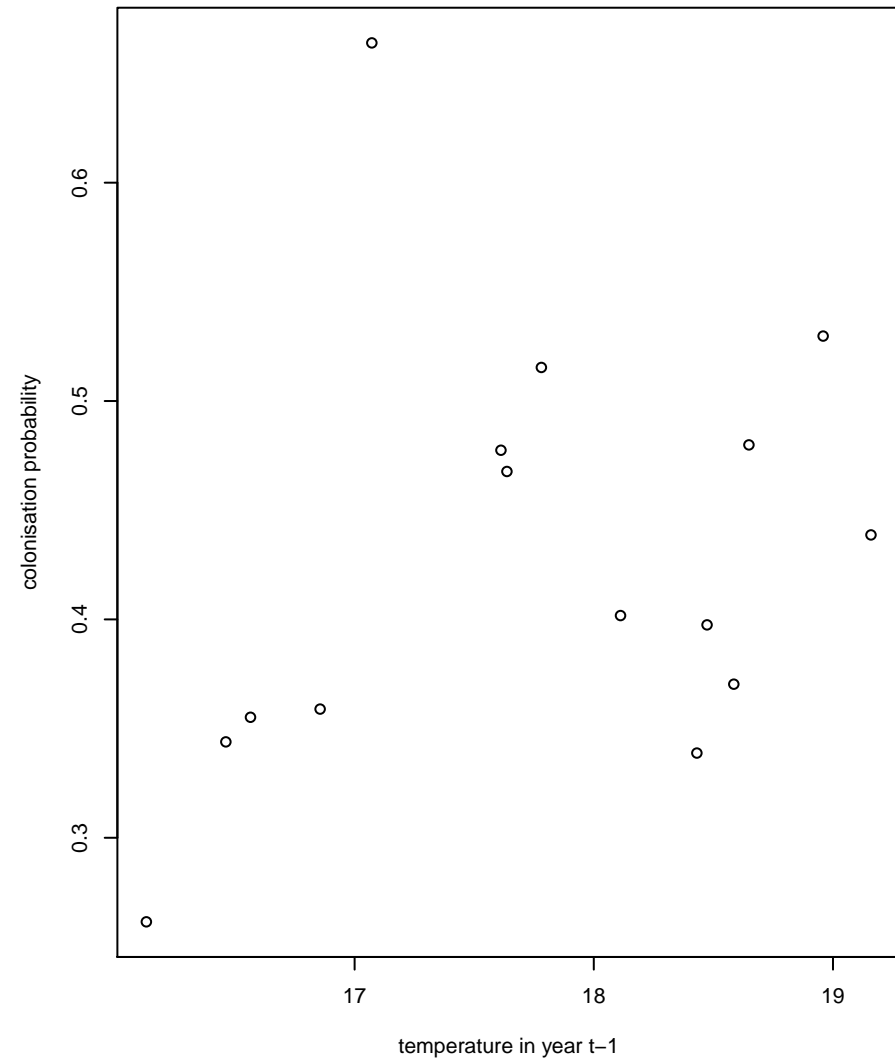

**Erythromma viridulum**

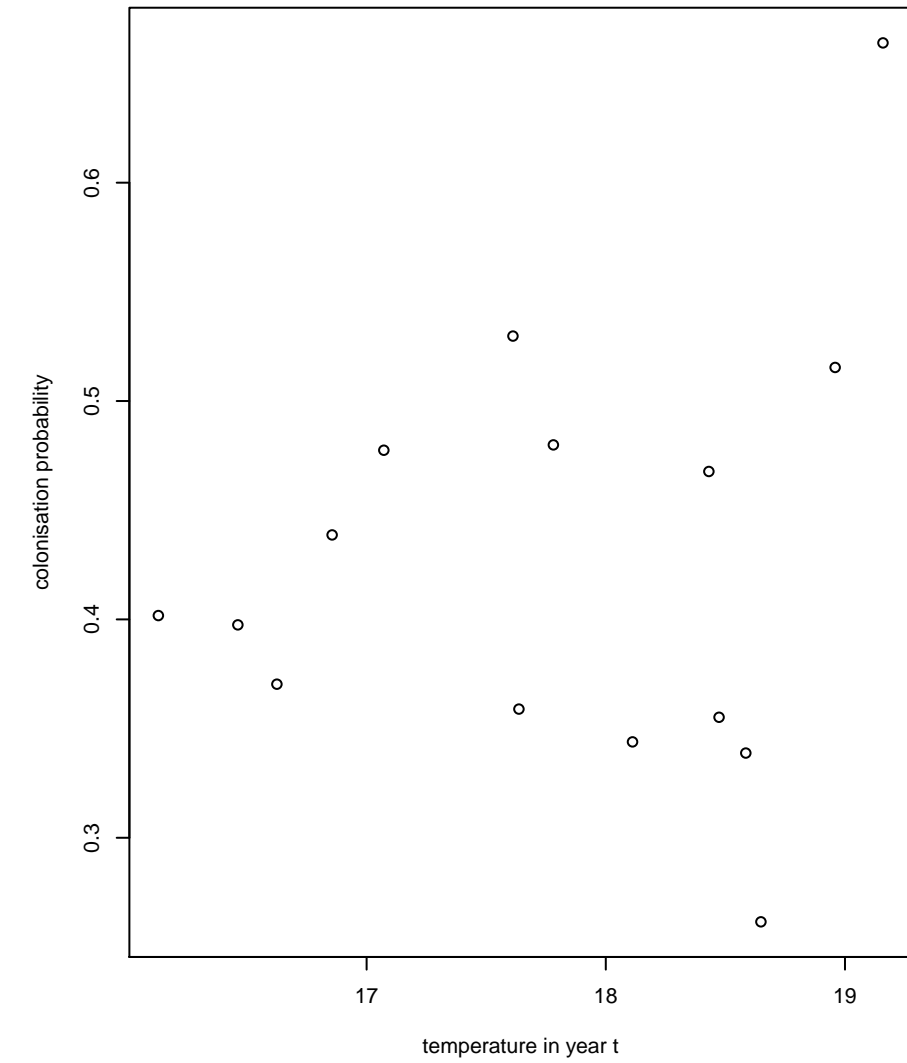

**Platycnemis pennipes**

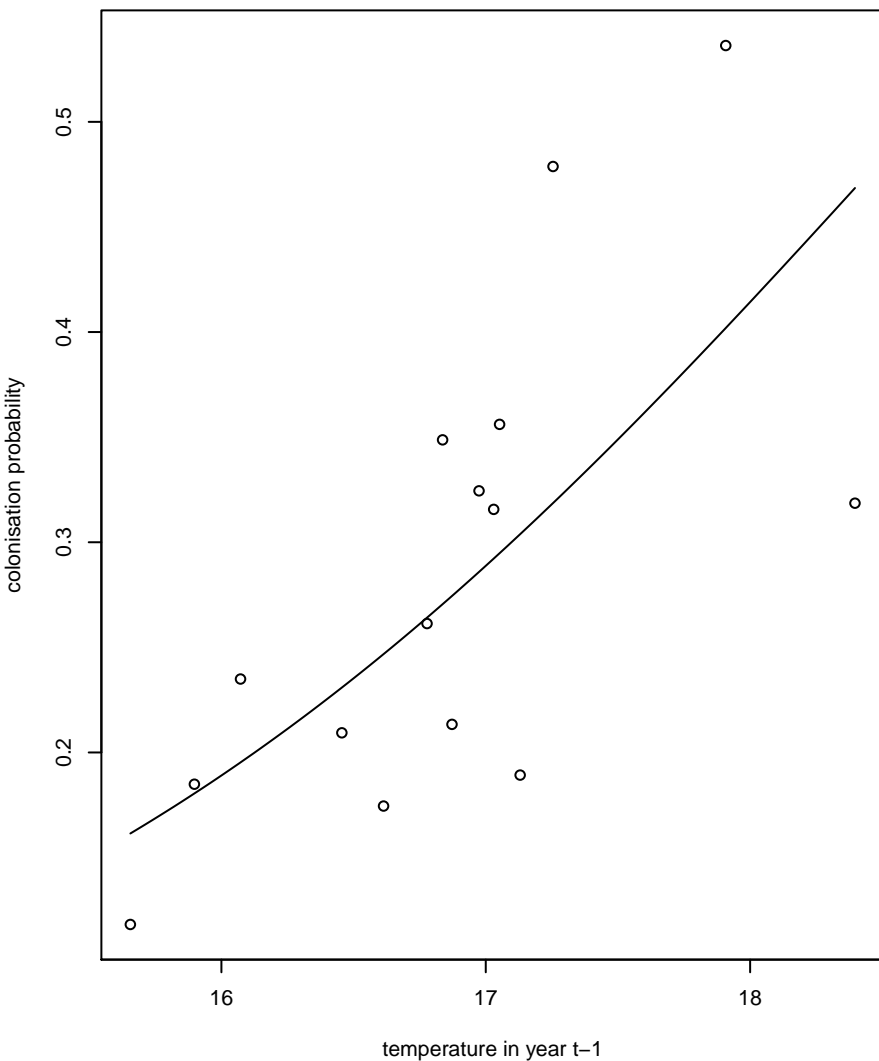

**Platycnemis pennipes**

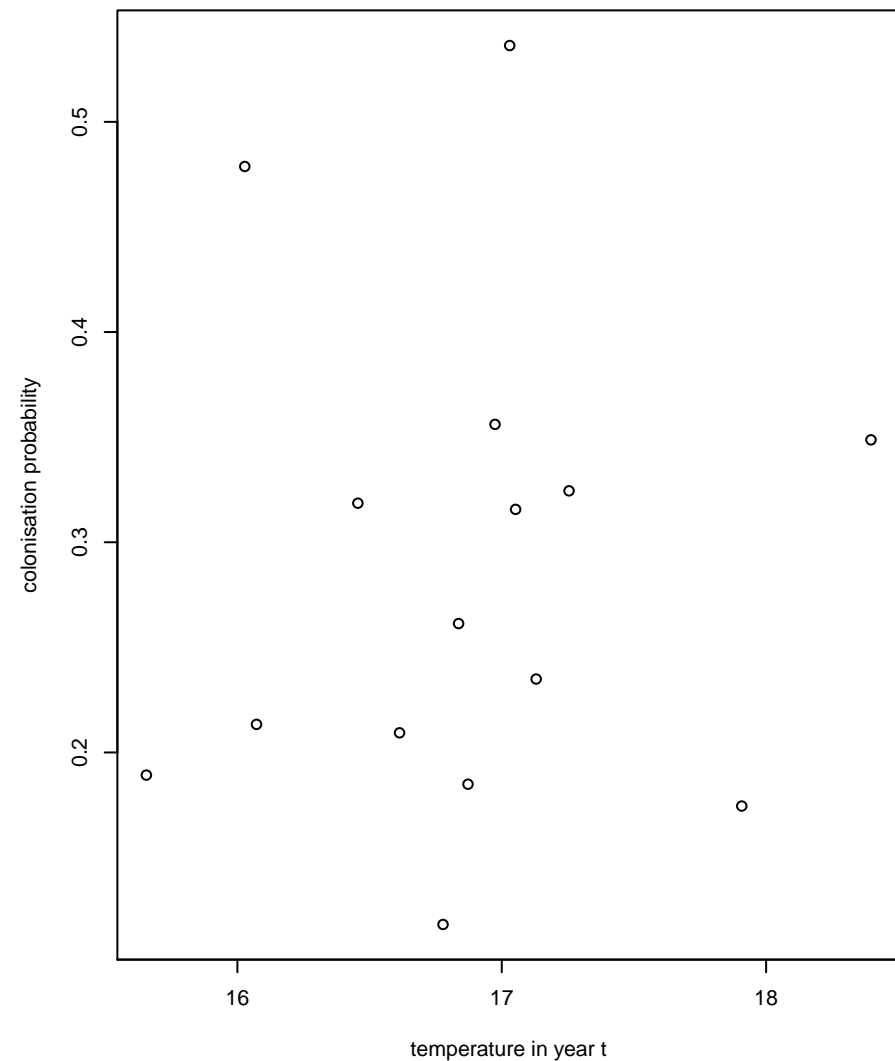

**Libellula fulva**

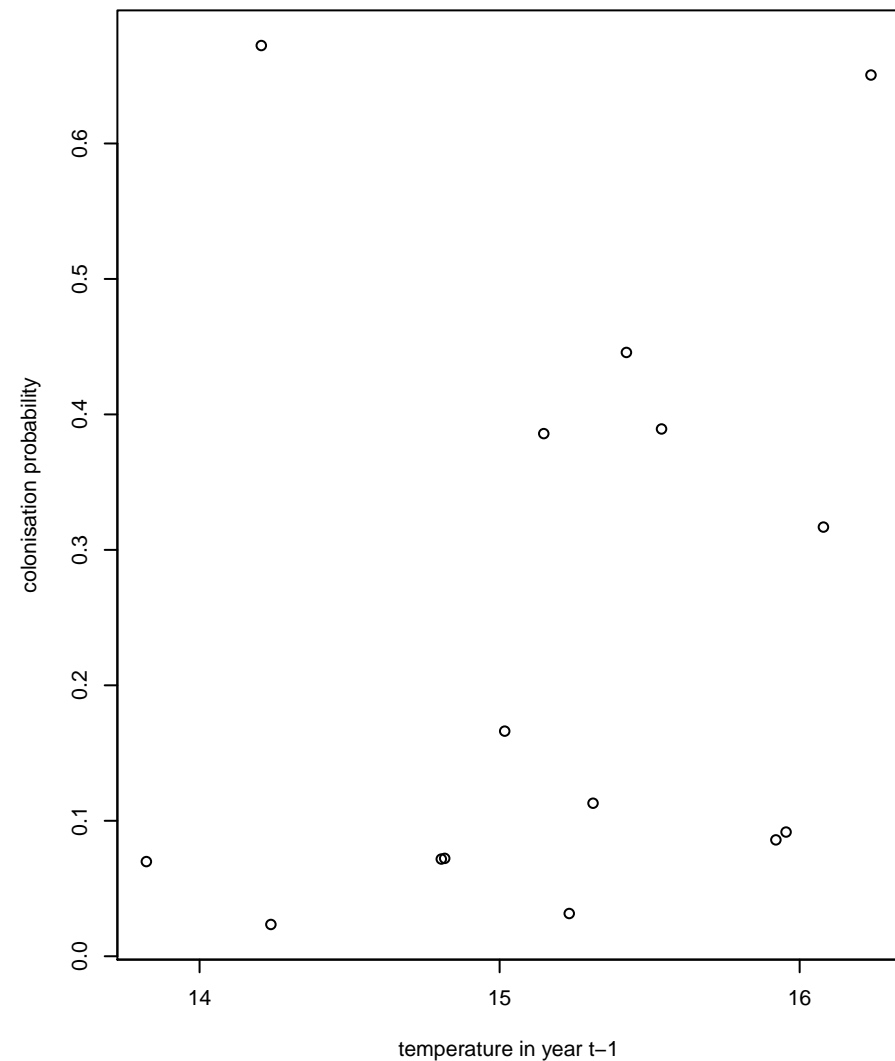

**Libellula fulva**

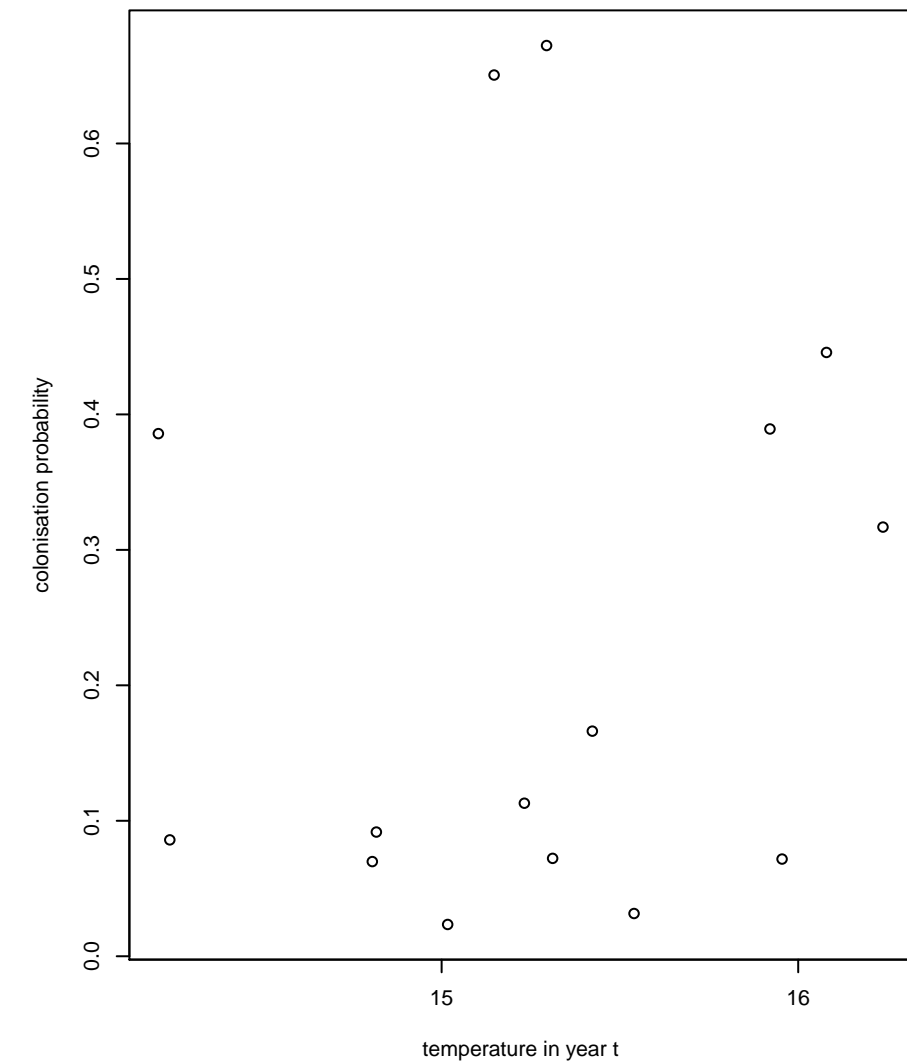

**Orthetrum coerulescens**

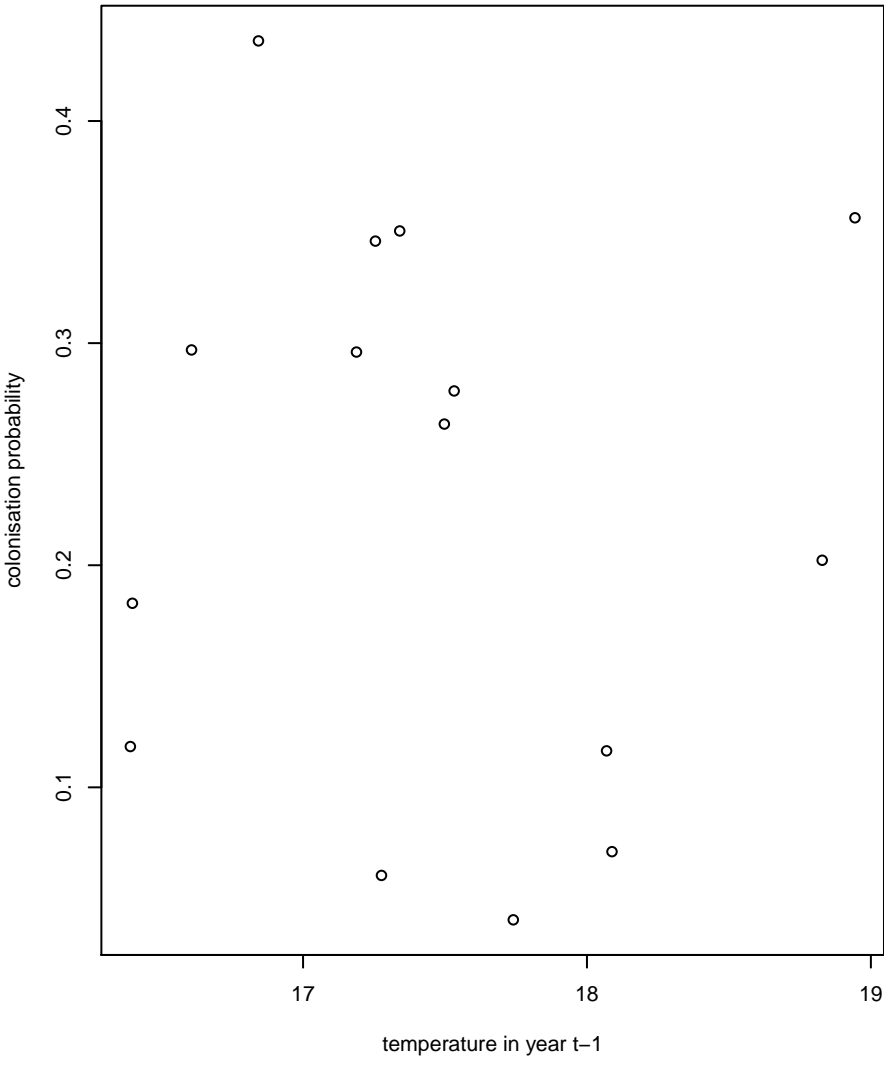

**Orthetrum coerulescens**

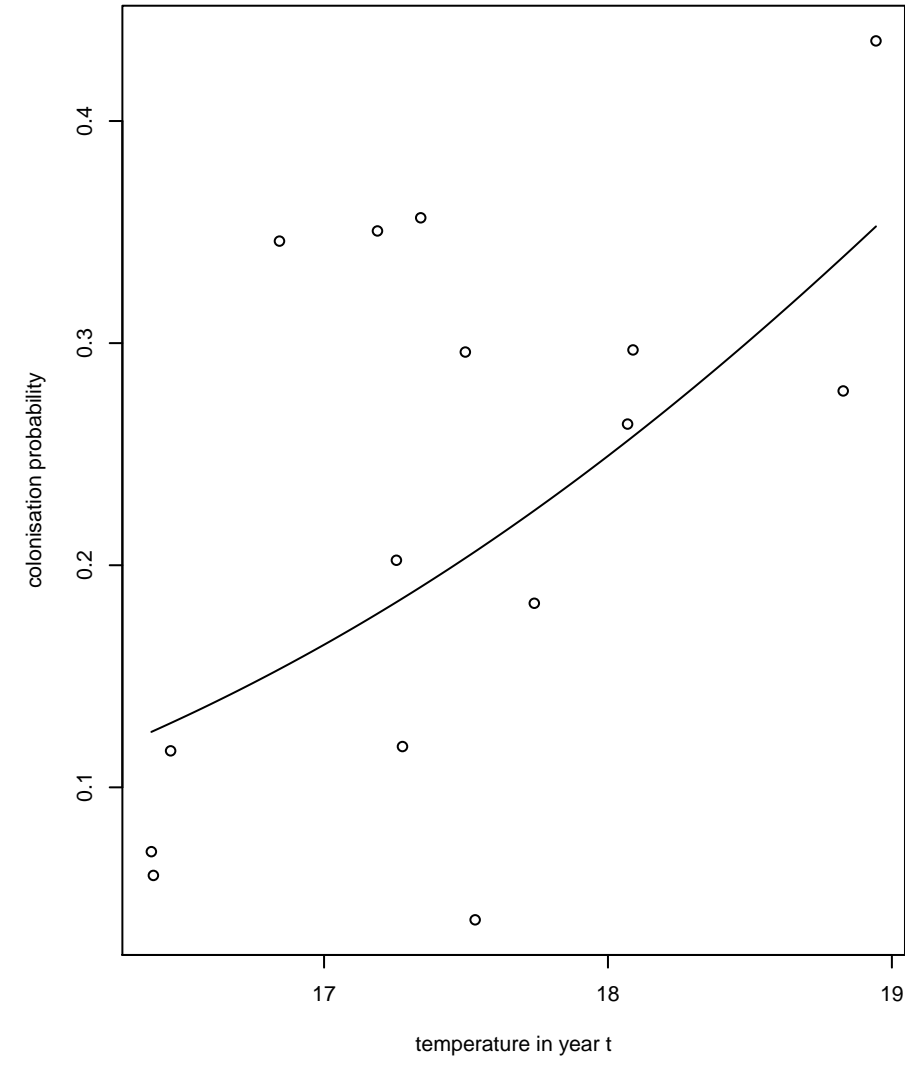

**Coenagrion hastulatum**

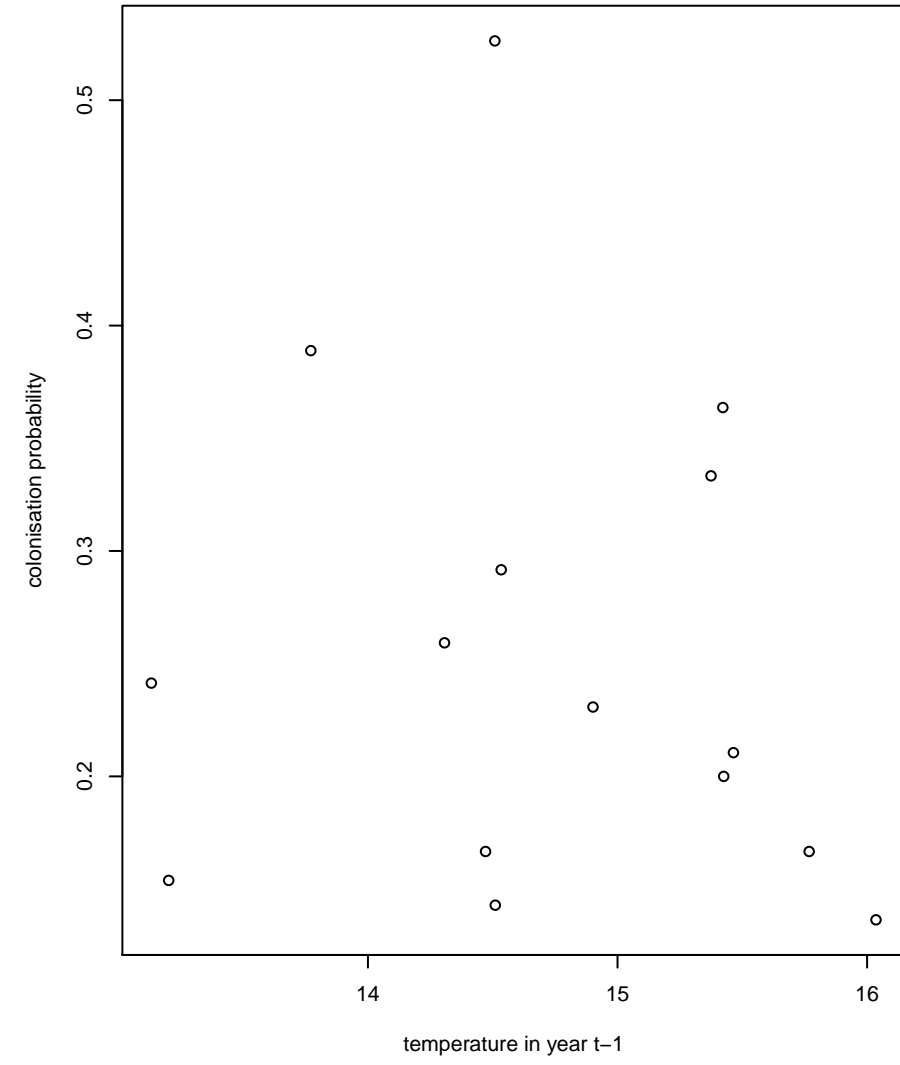

**Coenagrion hastulatum**

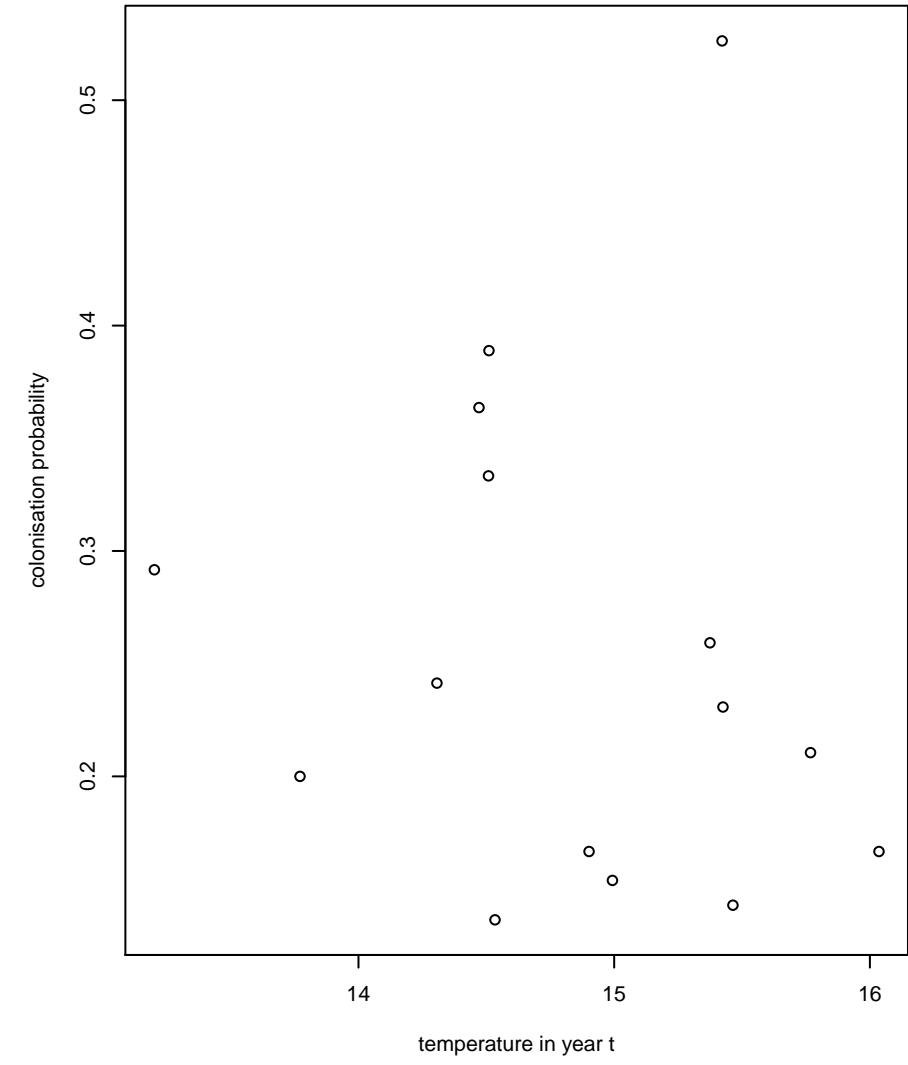

**Sympetrum meridionale**

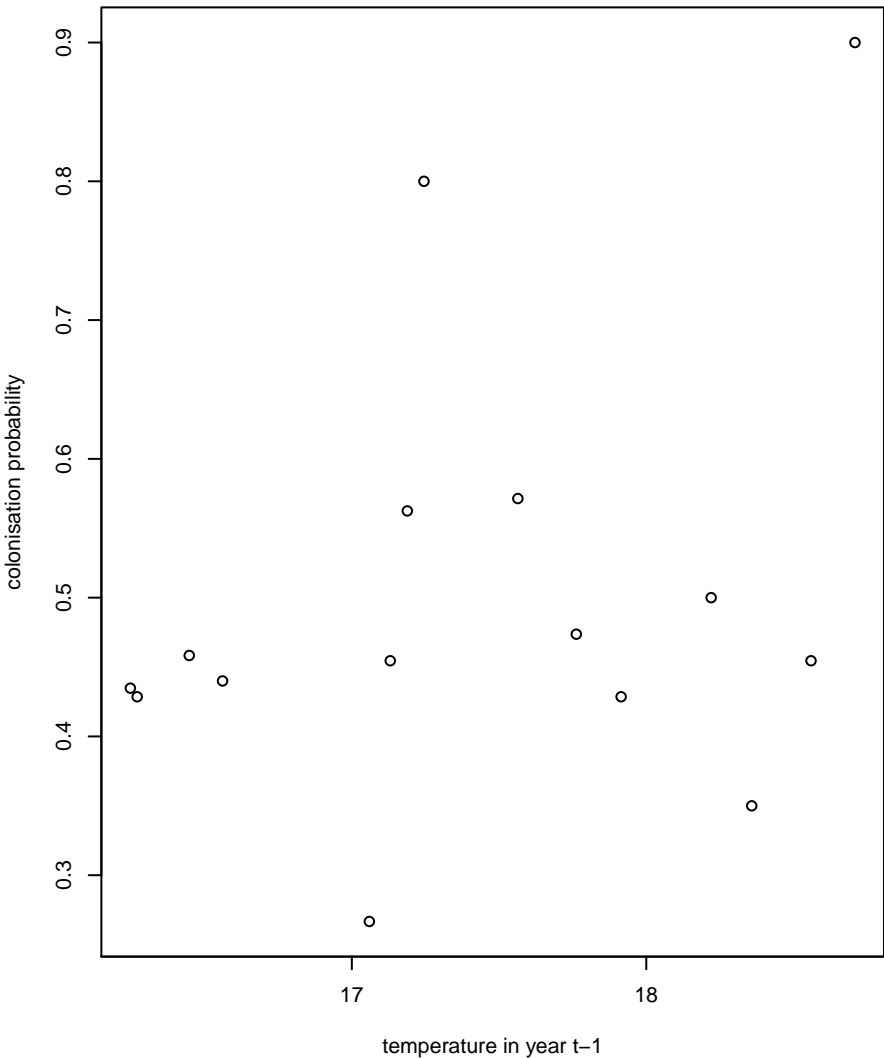

**Sympetrum meridionale**

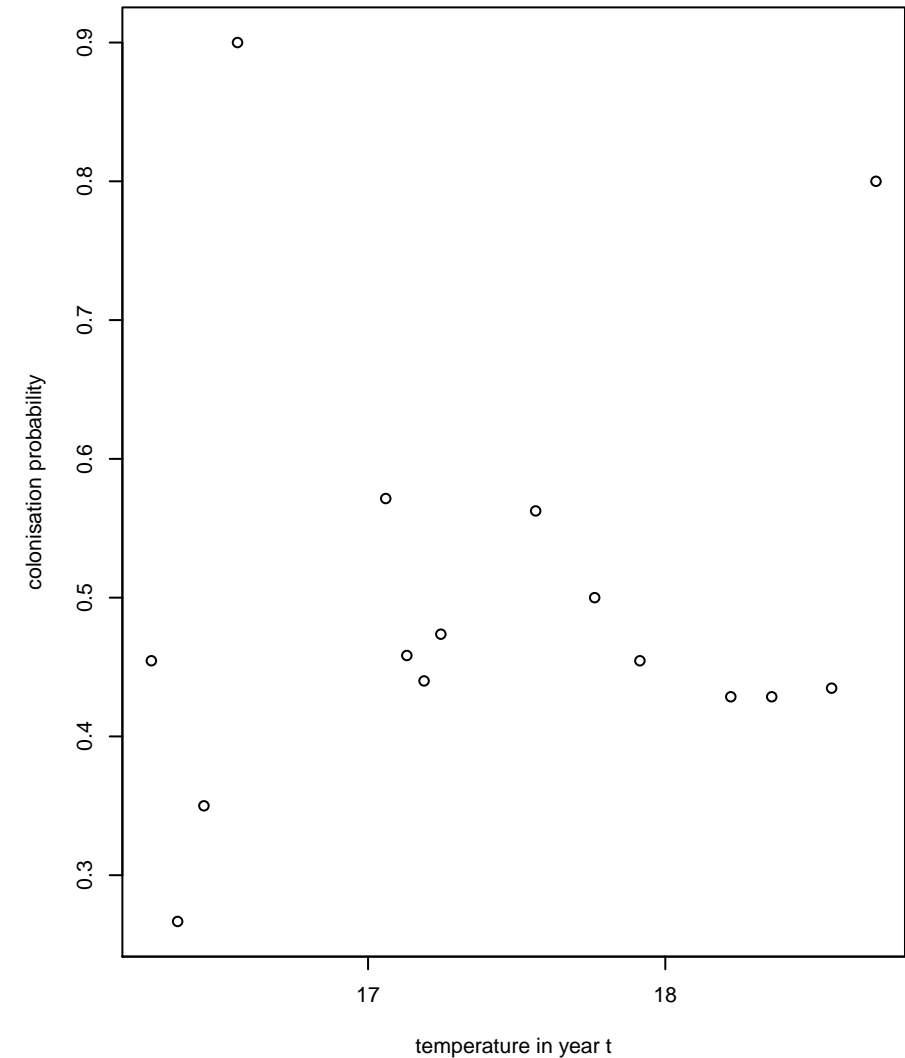

**Gomphus pulchellus**

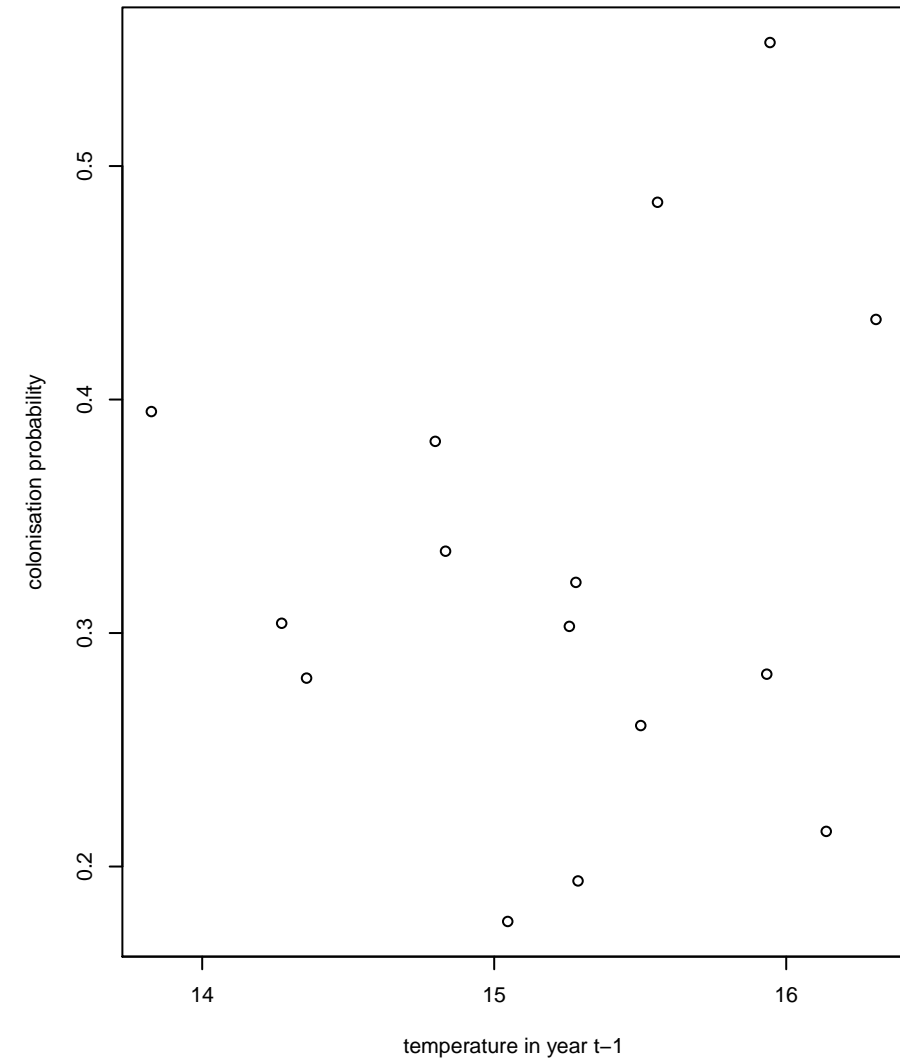

**Gomphus pulchellus**

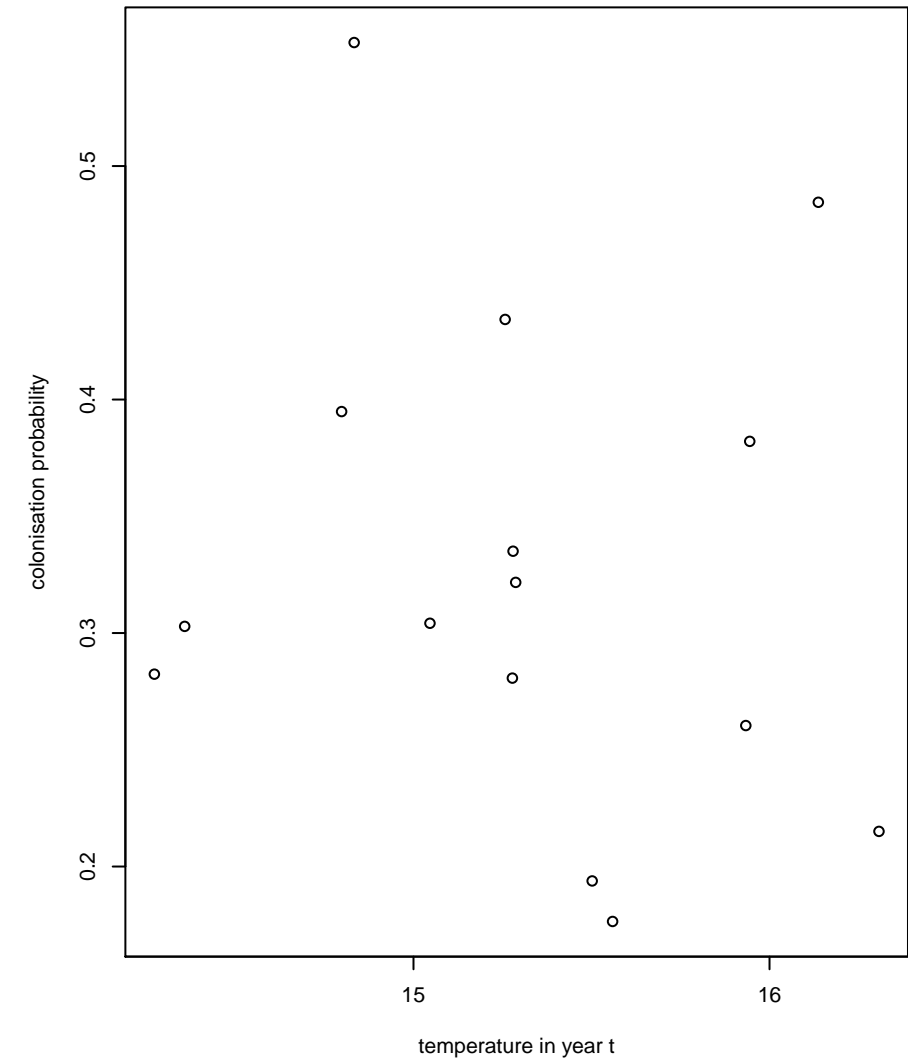

**Erythromma lindenii**

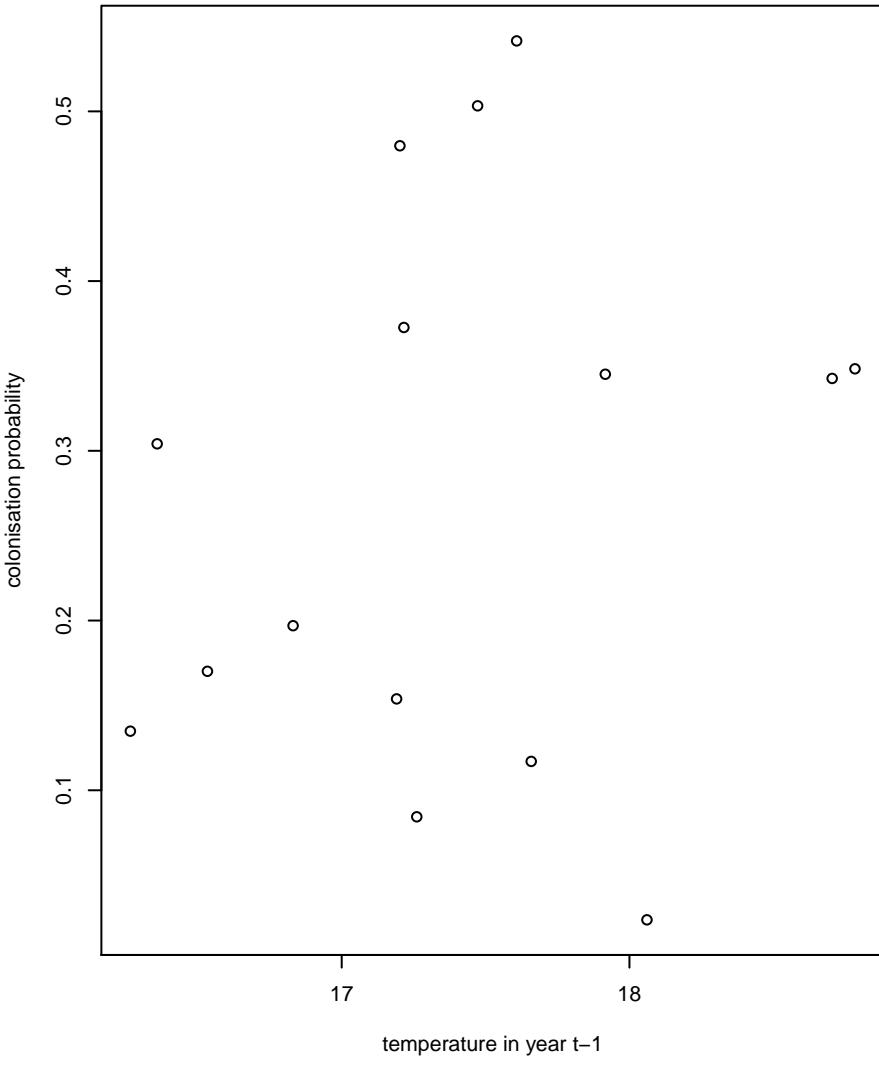

**Erythromma lindenii**

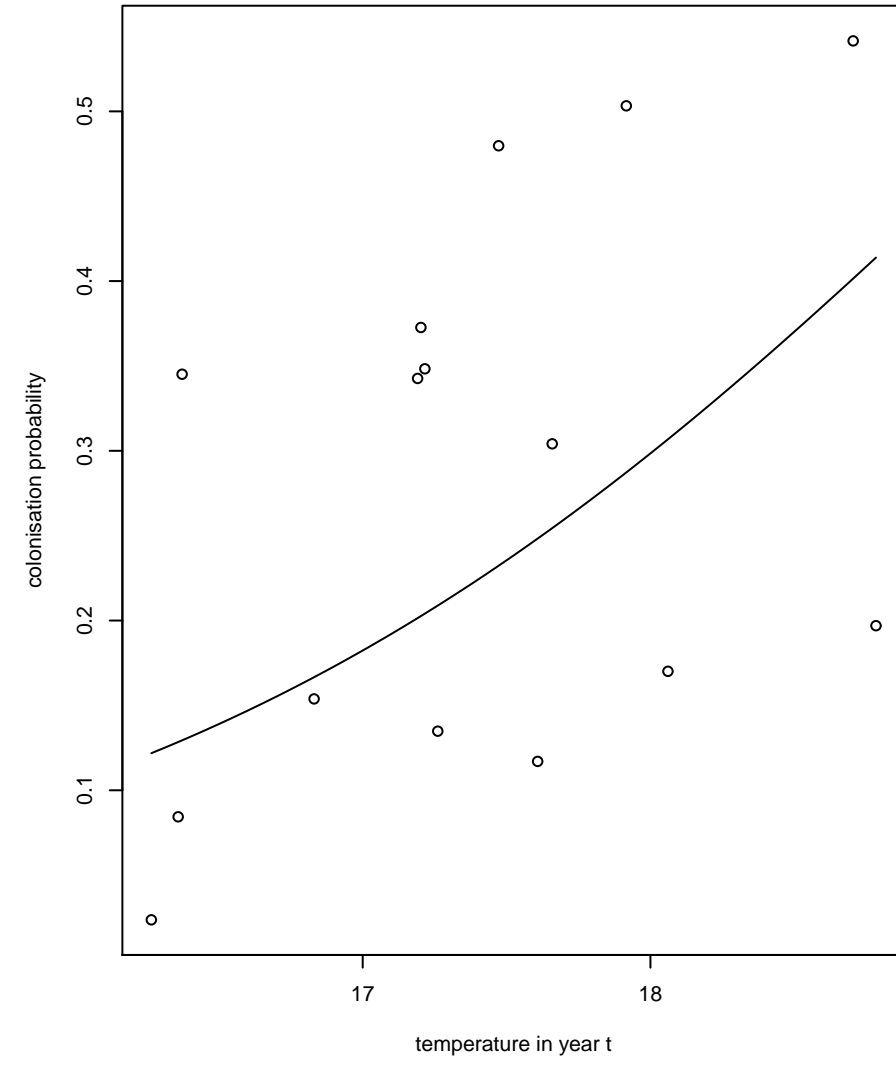

**Somatochlora flavomaculata**

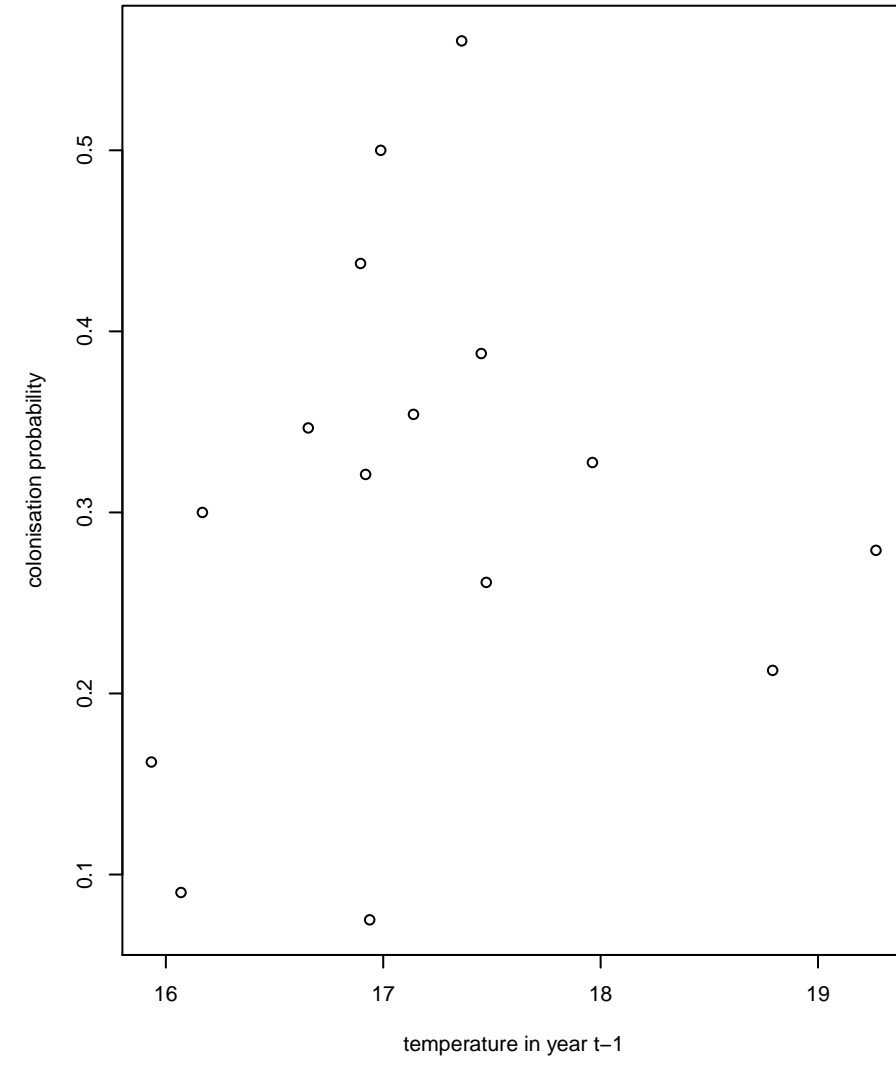

**Somatochlora flavomaculata**

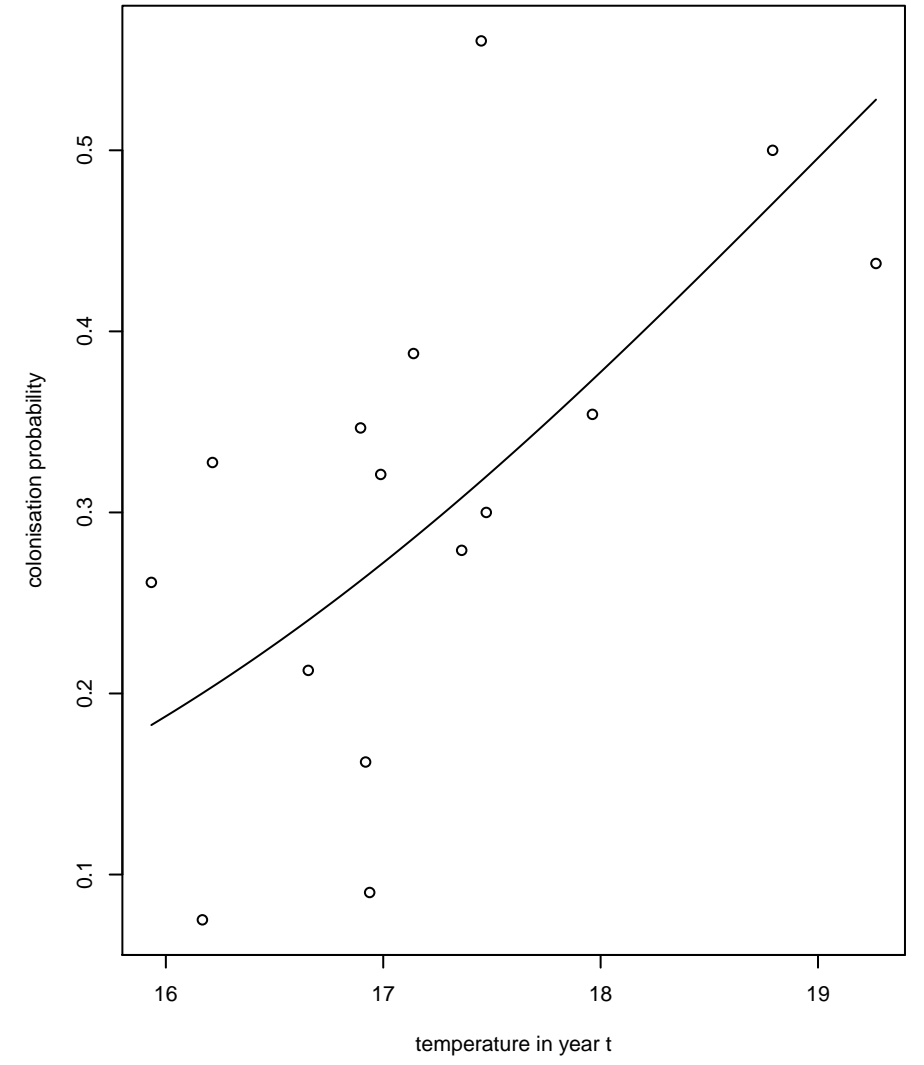

**Sympetrum depressiusculum**

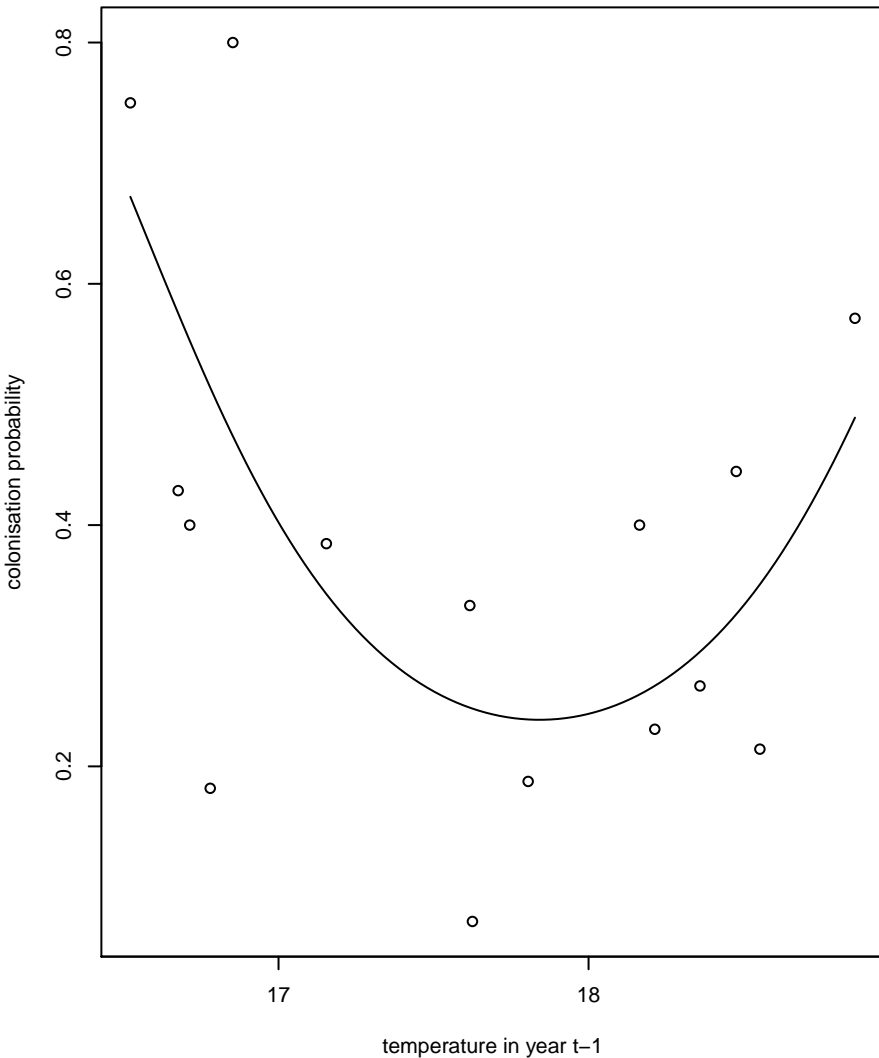

**Sympetrum depressiusculum**

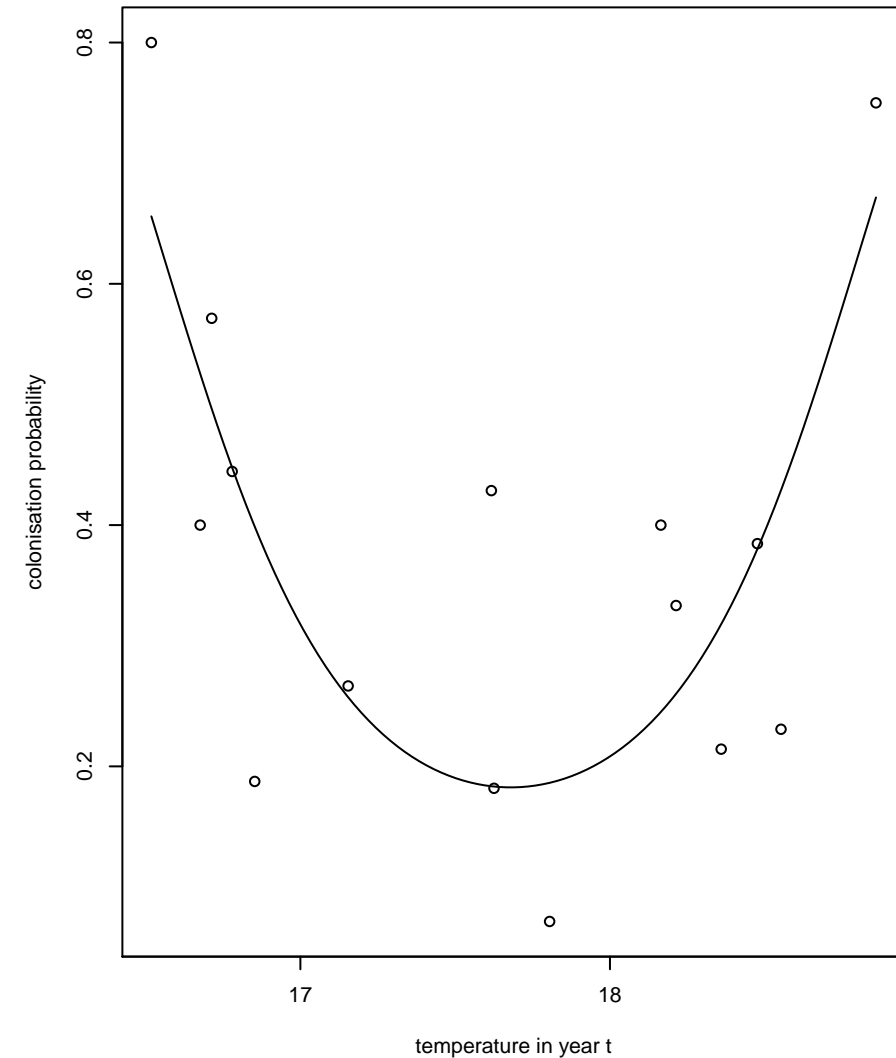

**Crocothemis erythraea**

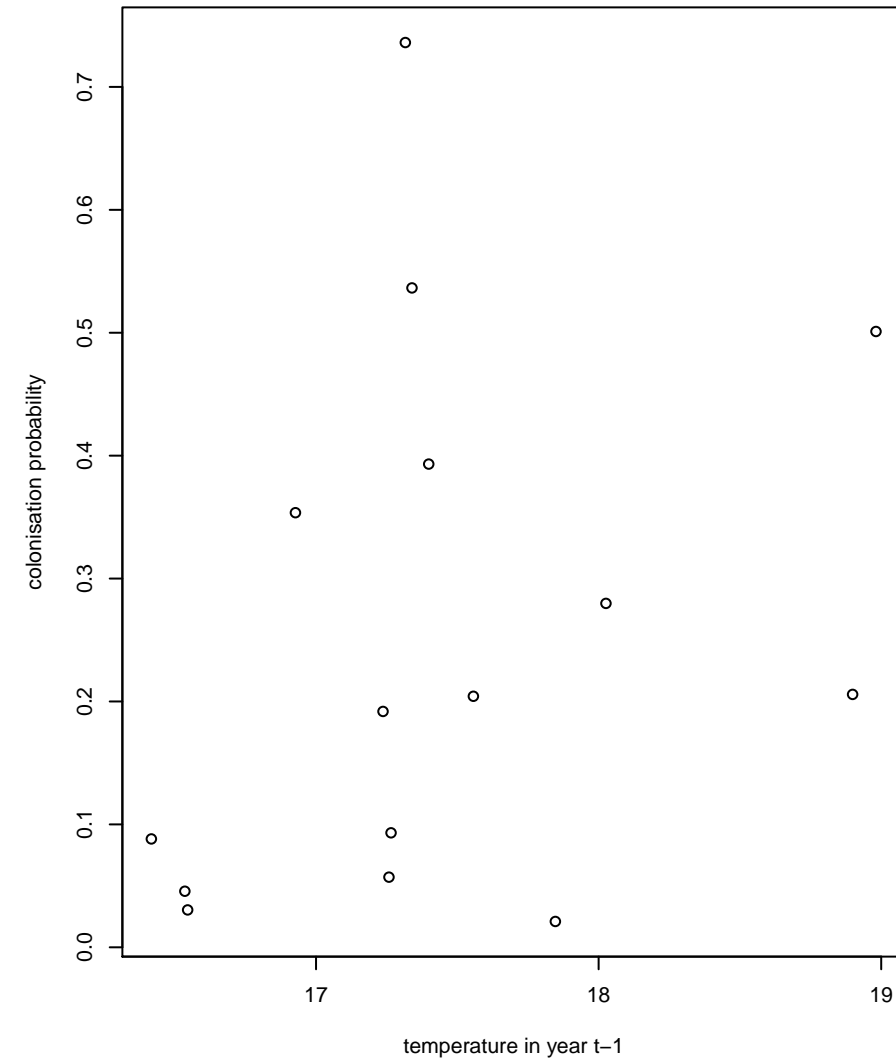

**Crocothemis erythraea**

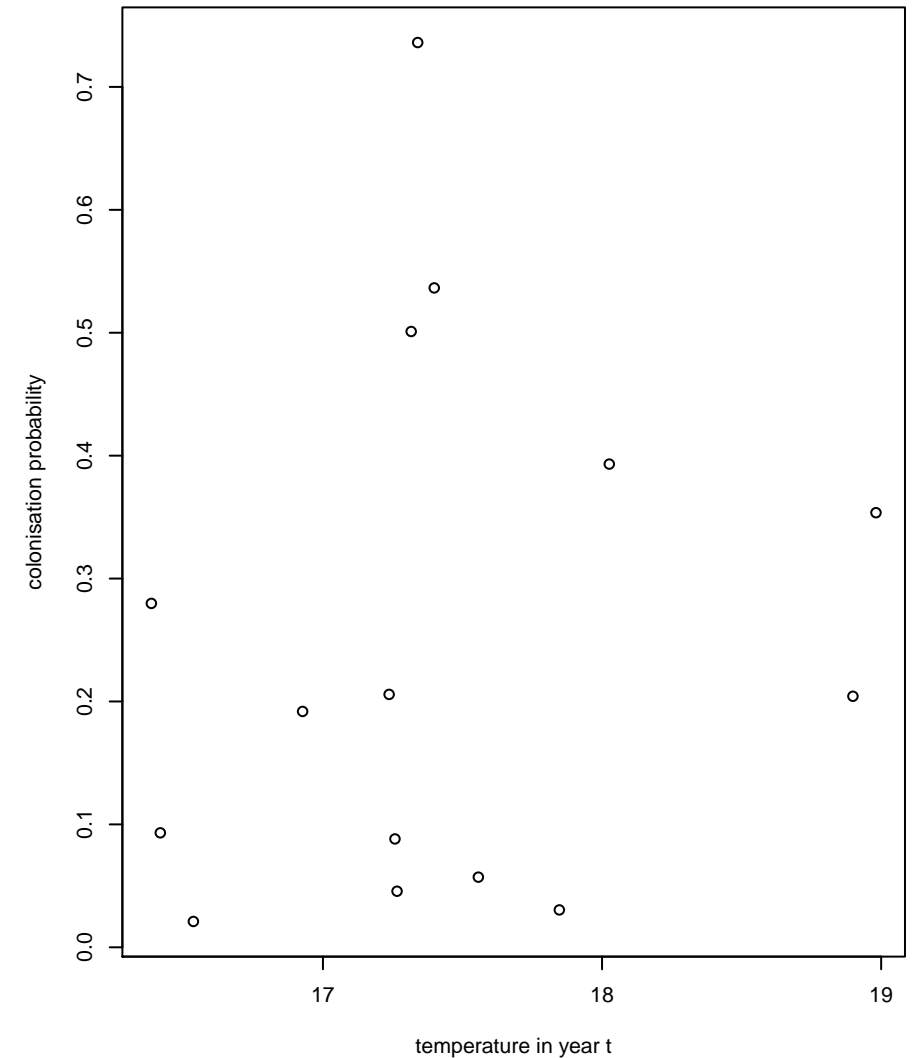



**Somatochlora arctica**

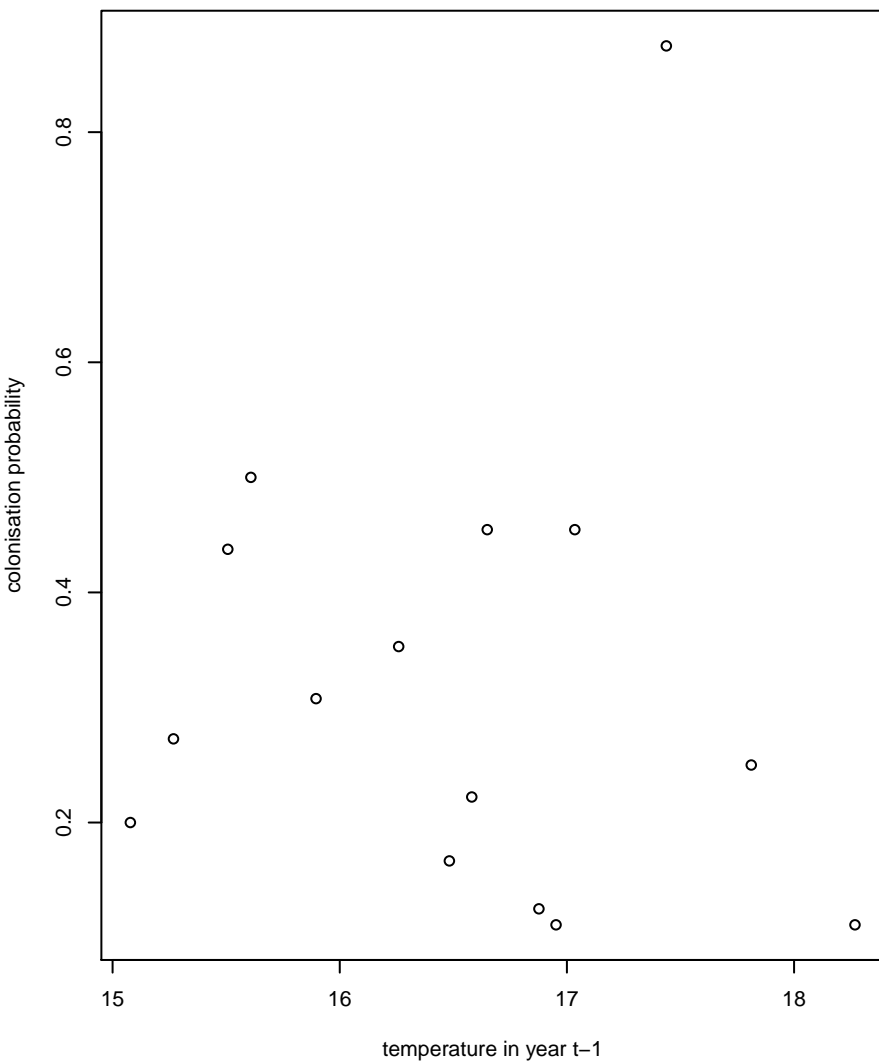

**Somatochlora arctica**

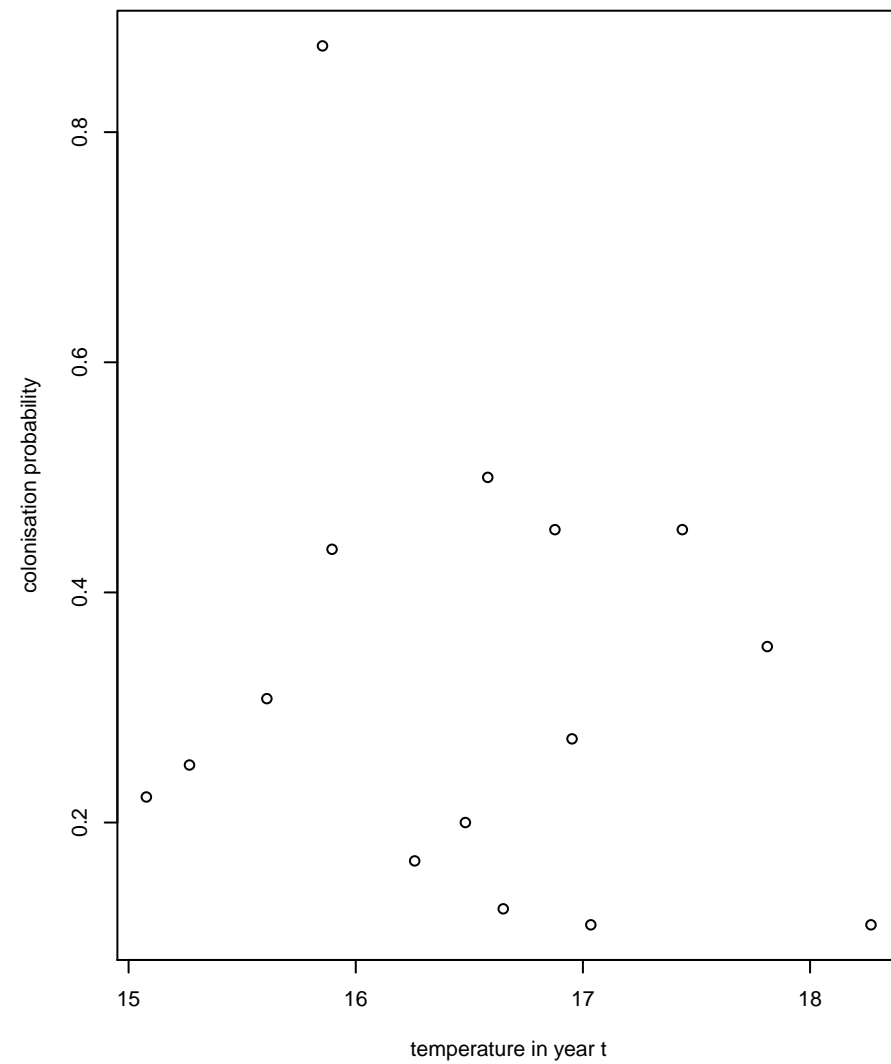

**Ophiogomphus cecilia**

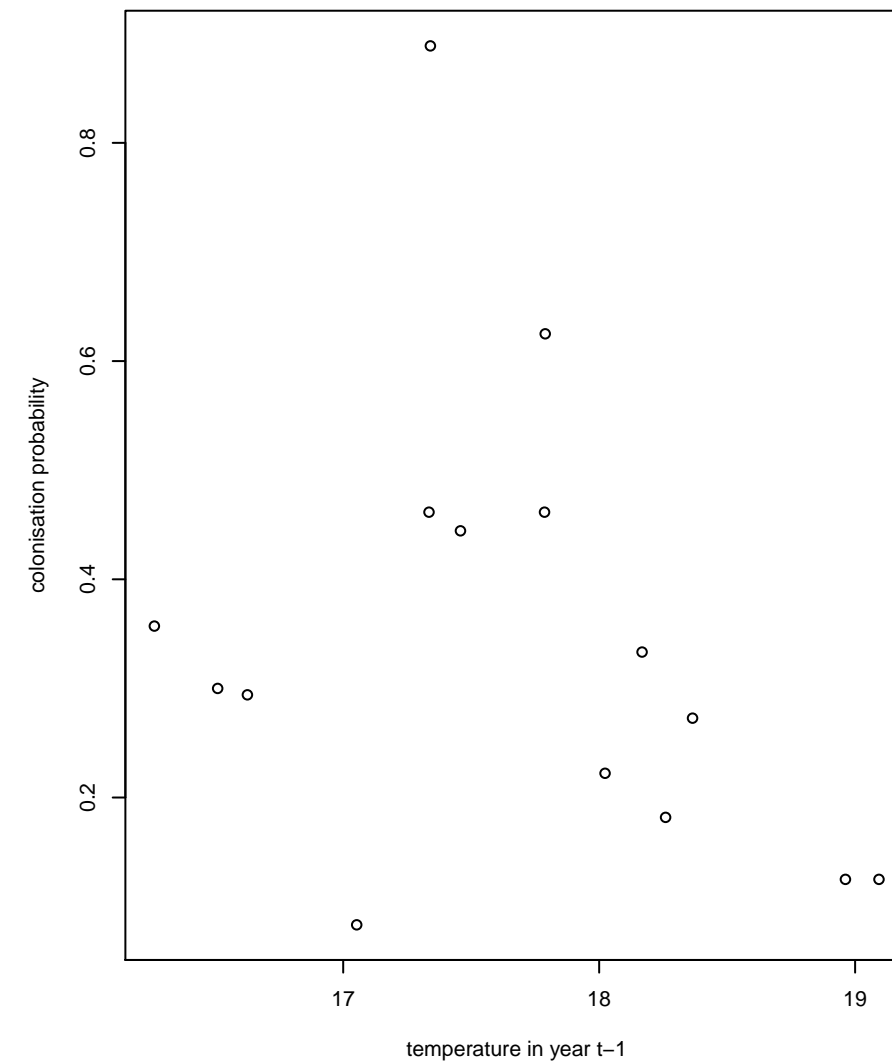

**Ophiogomphus cecilia**

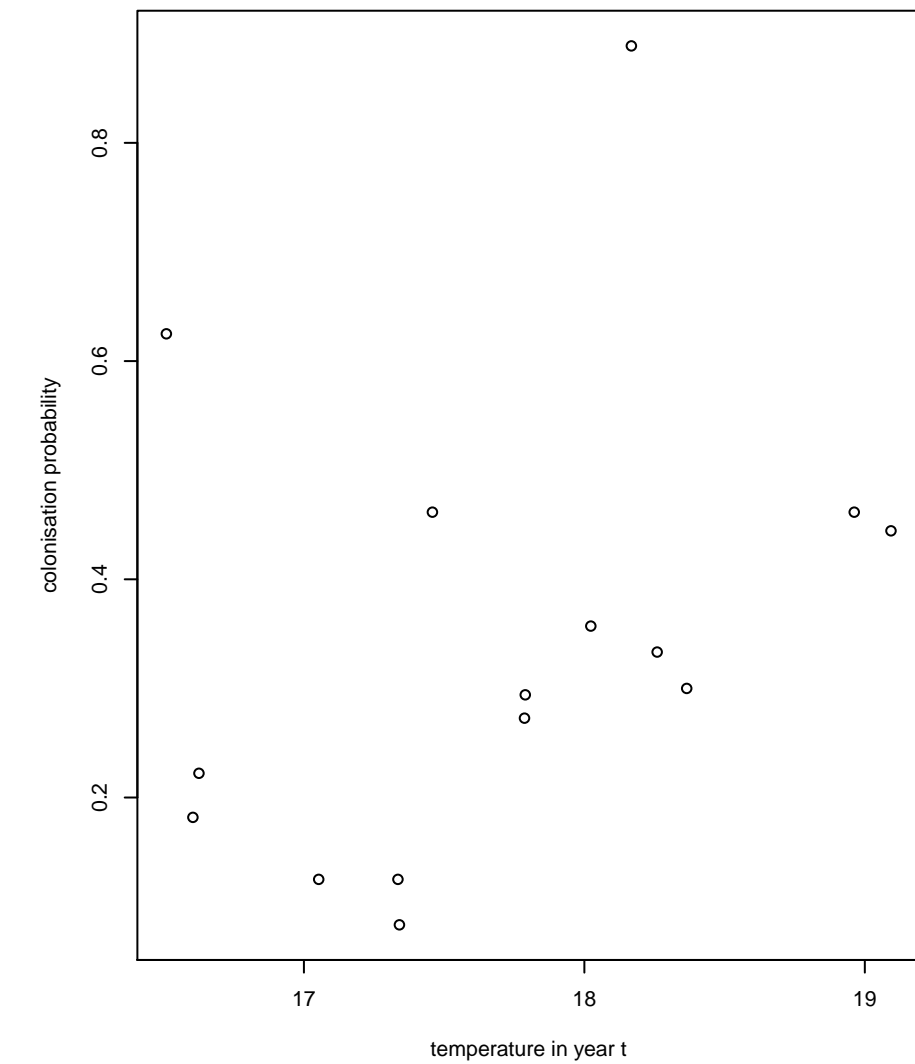

**Orthetrum brunneum**

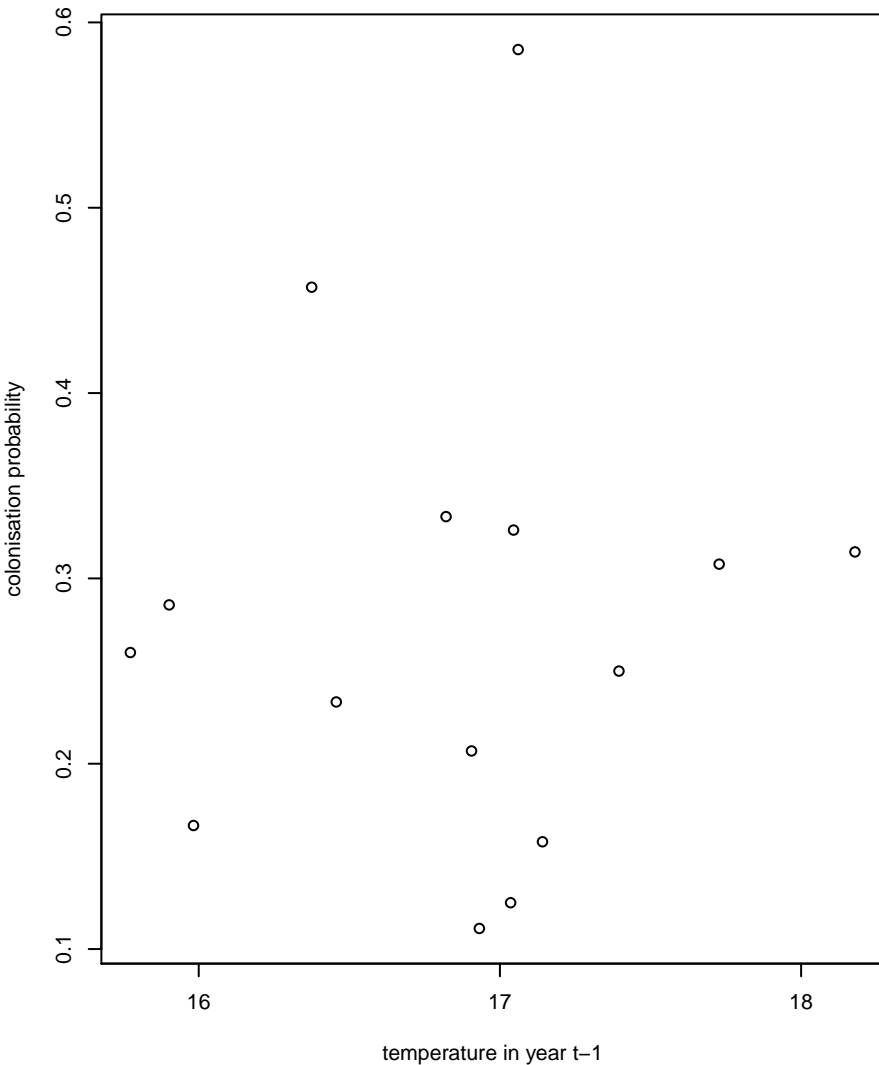

**Orthetrum brunneum**

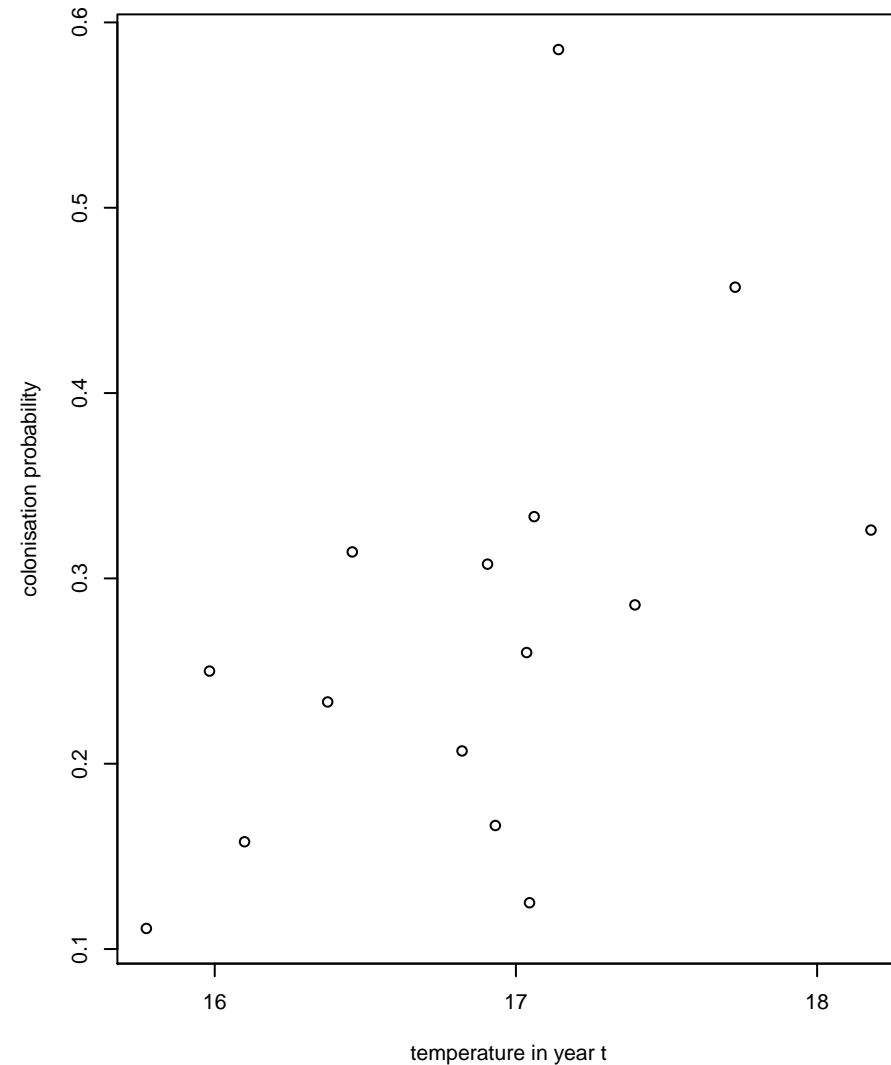

**Aeshna affinis**

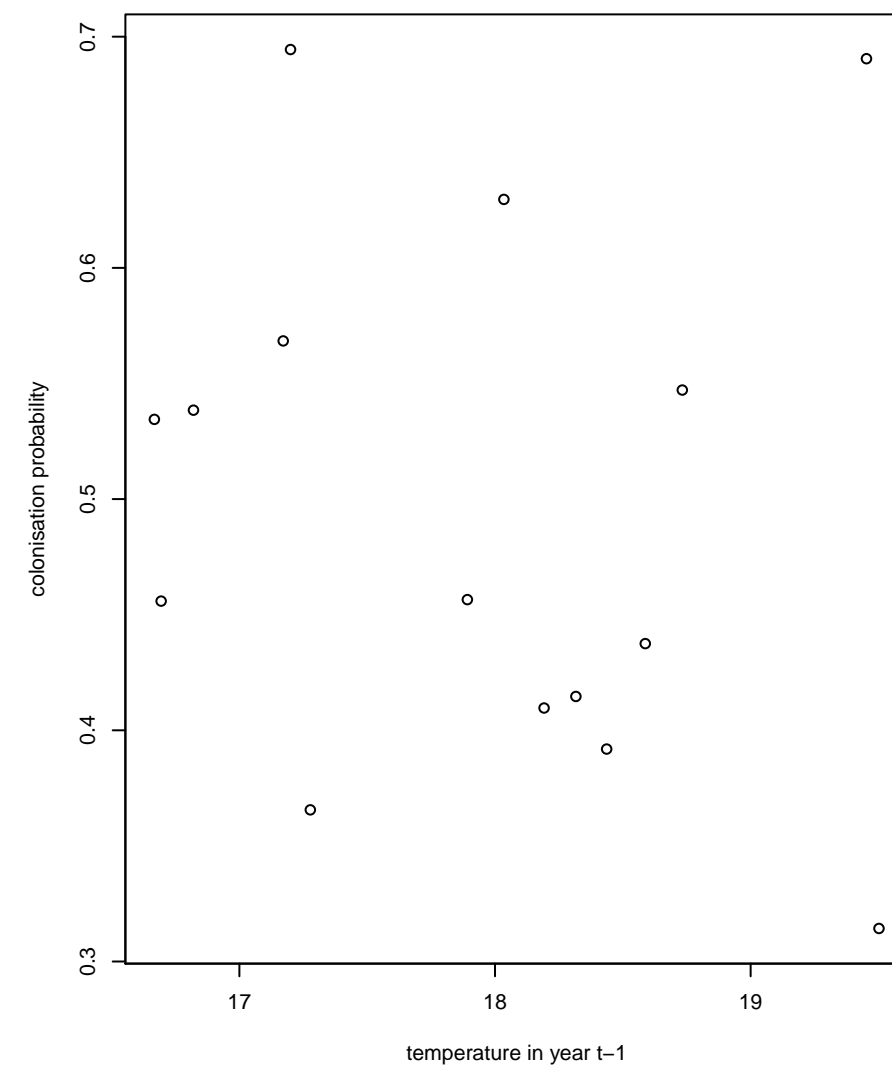

**Aeshna affinis**

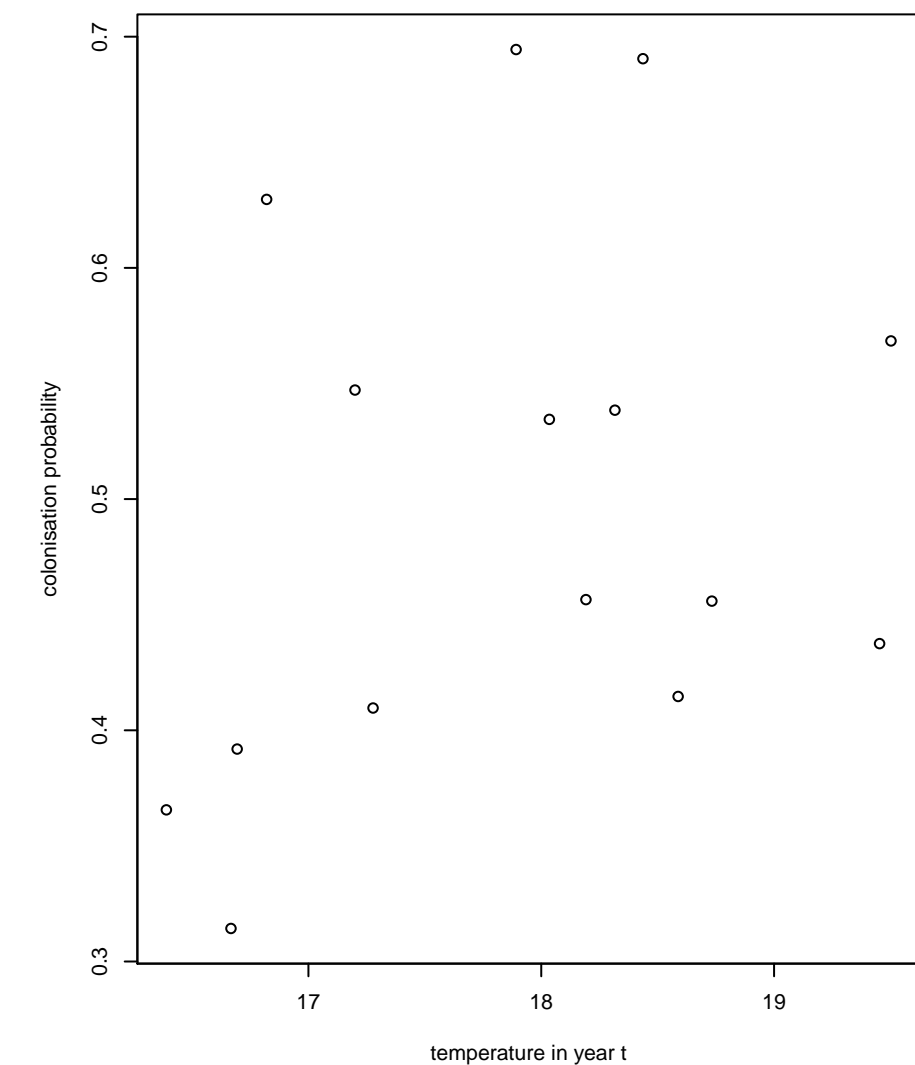

**Anax parthenope**

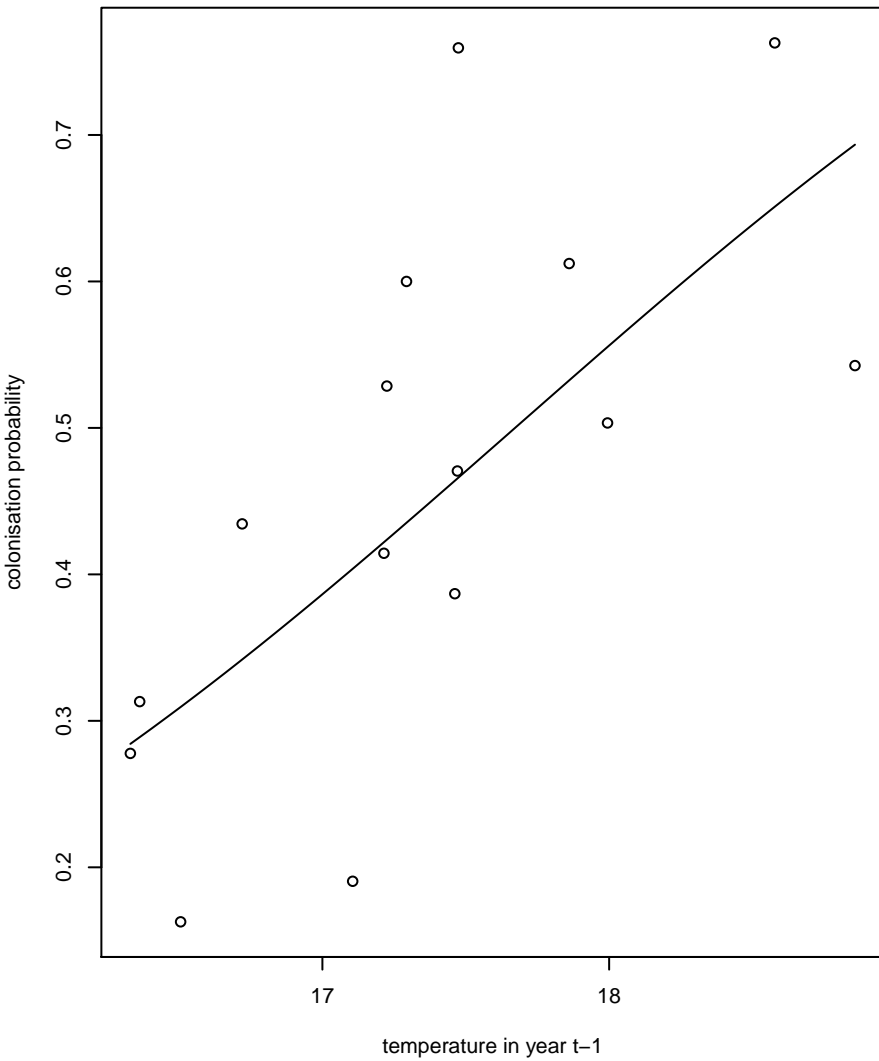

**Anax parthenope**

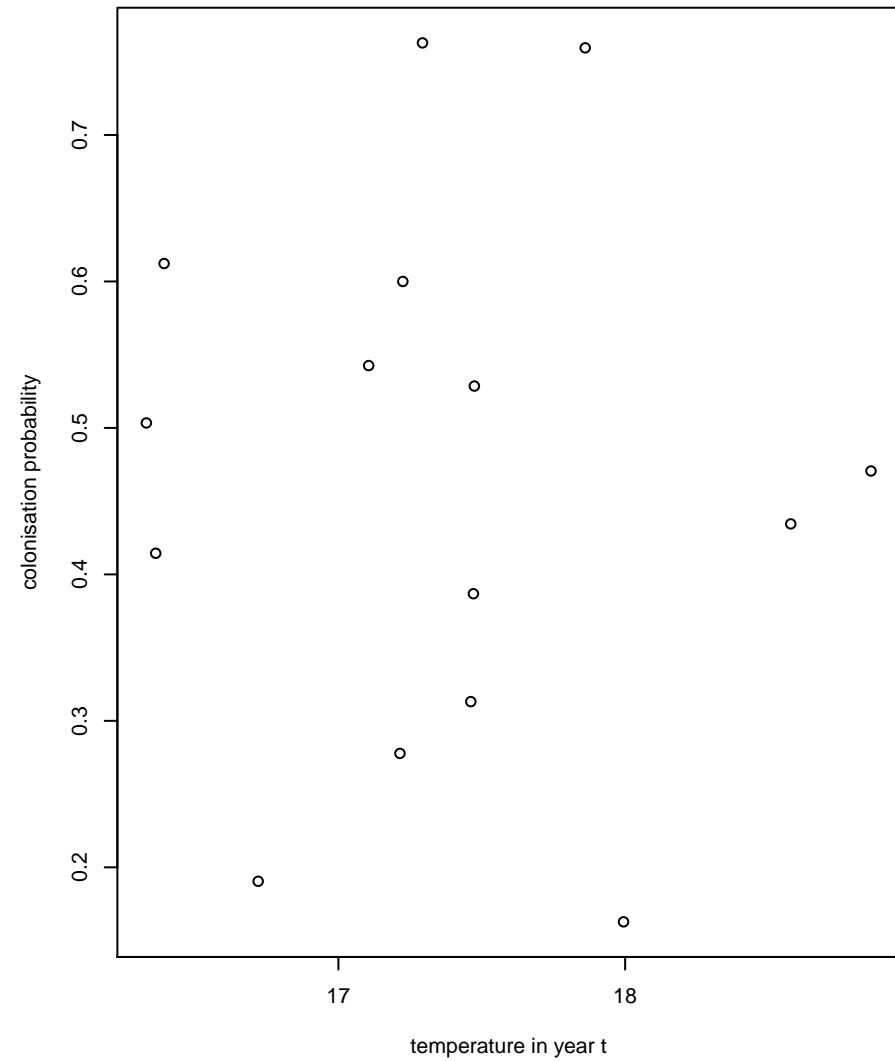

**Sympetrum pedemontanum**

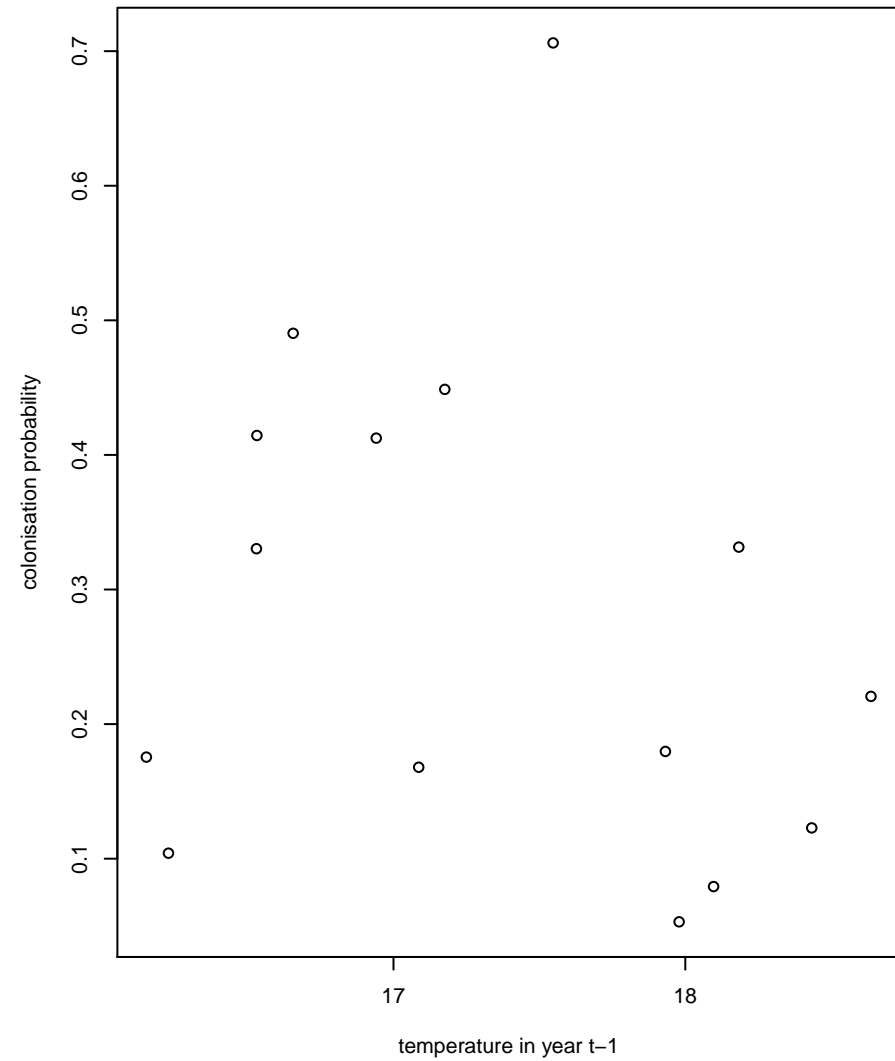

**Sympetrum pedemontanum**

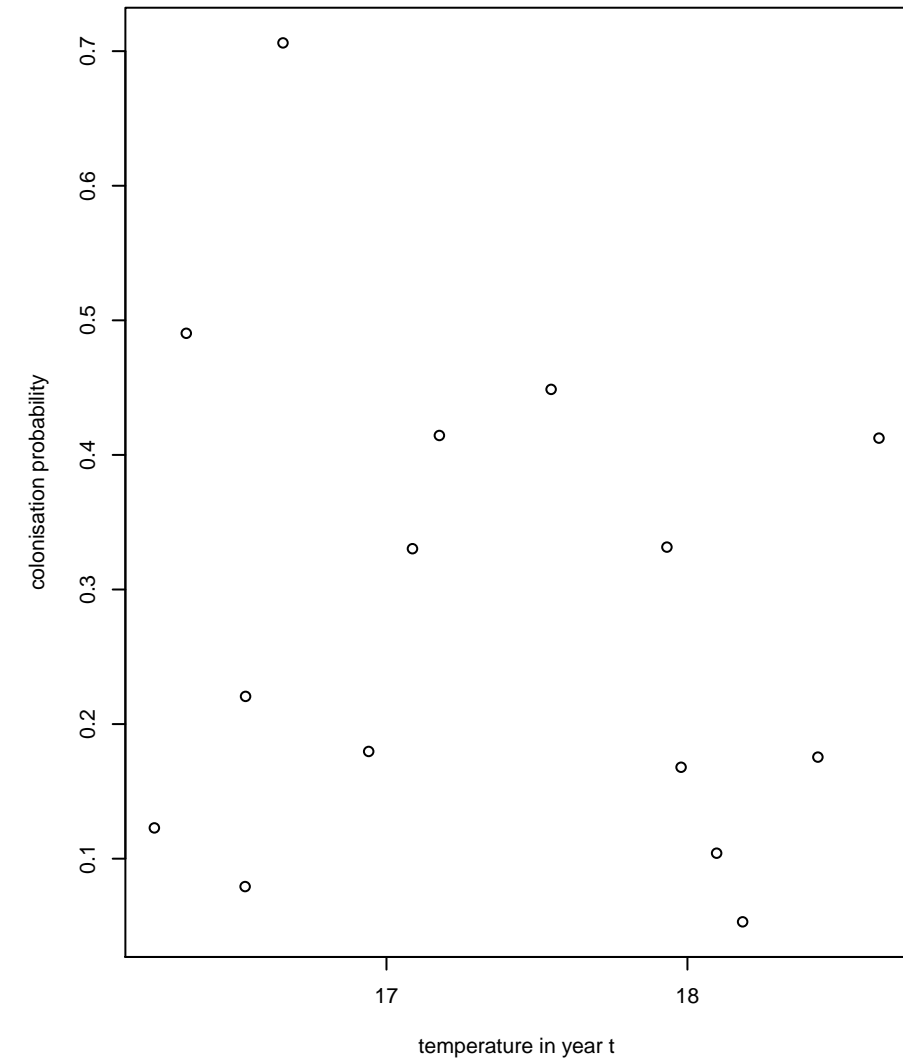

**Pyronia tithonus**

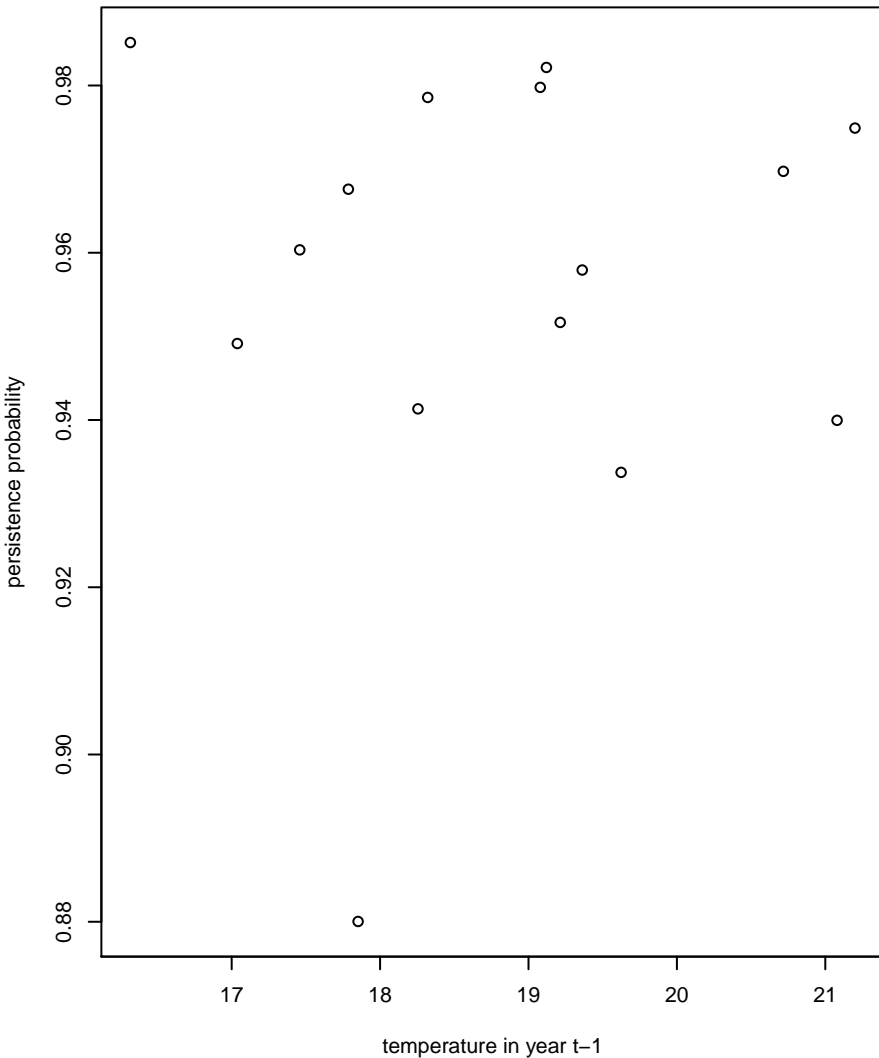

**Pyronia tithonus**

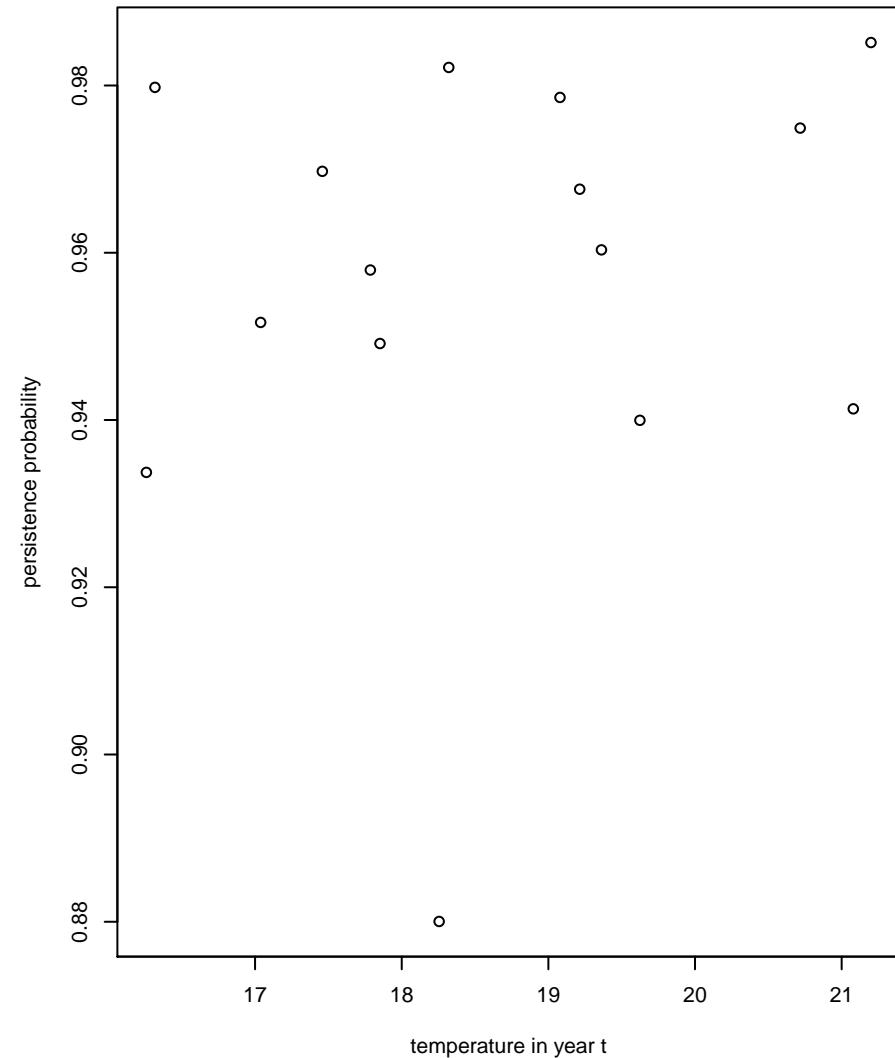

**Maniola jurtina**

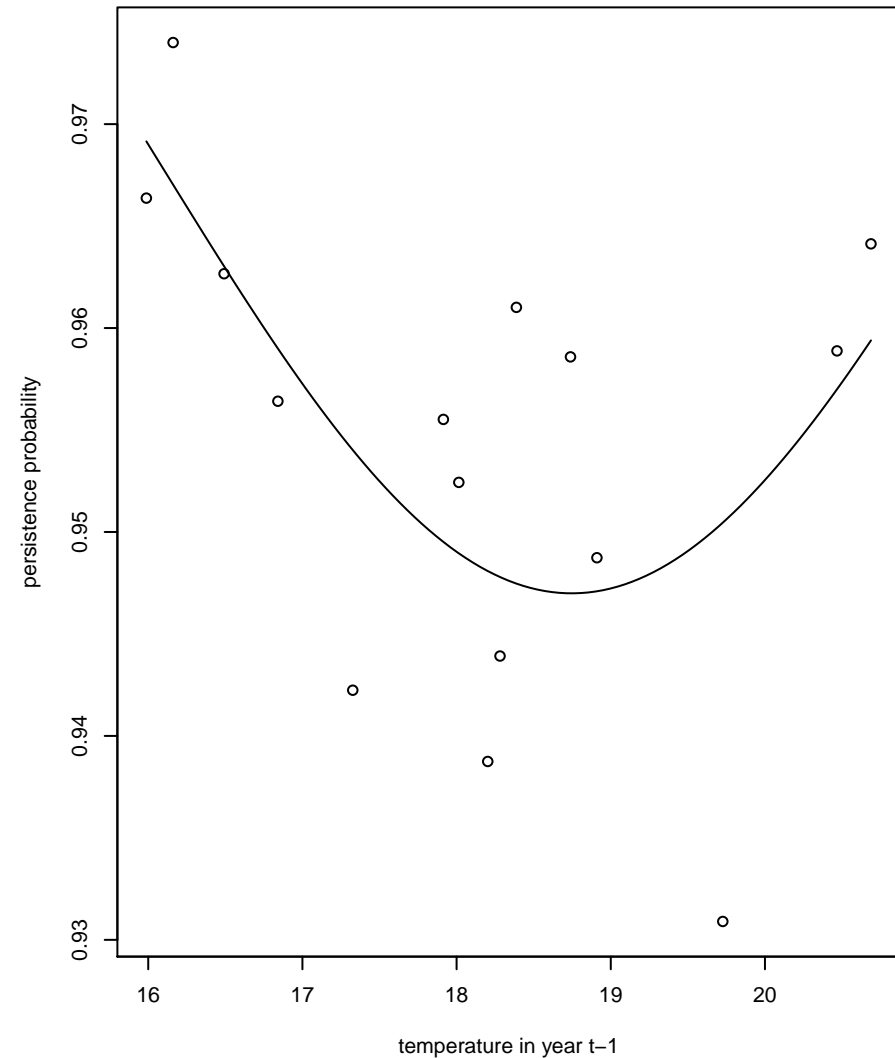

**Maniola jurtina**

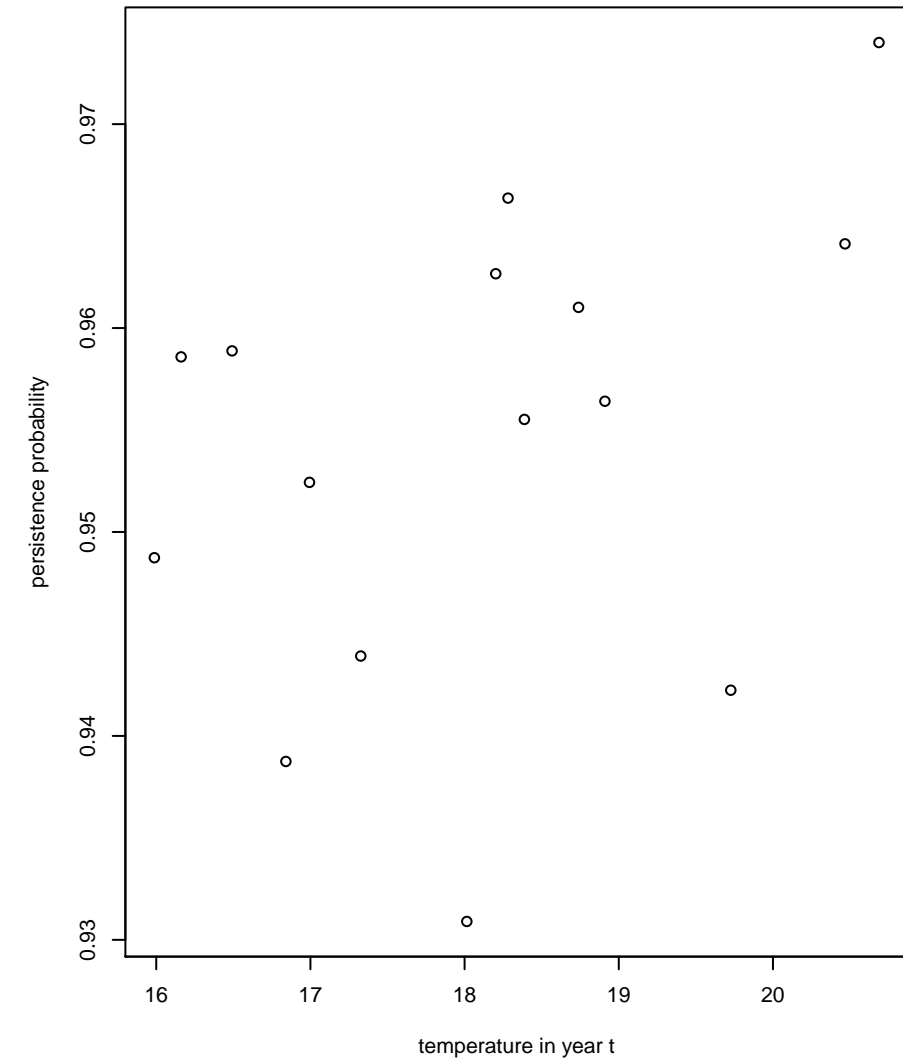

**Hipparchia semele**

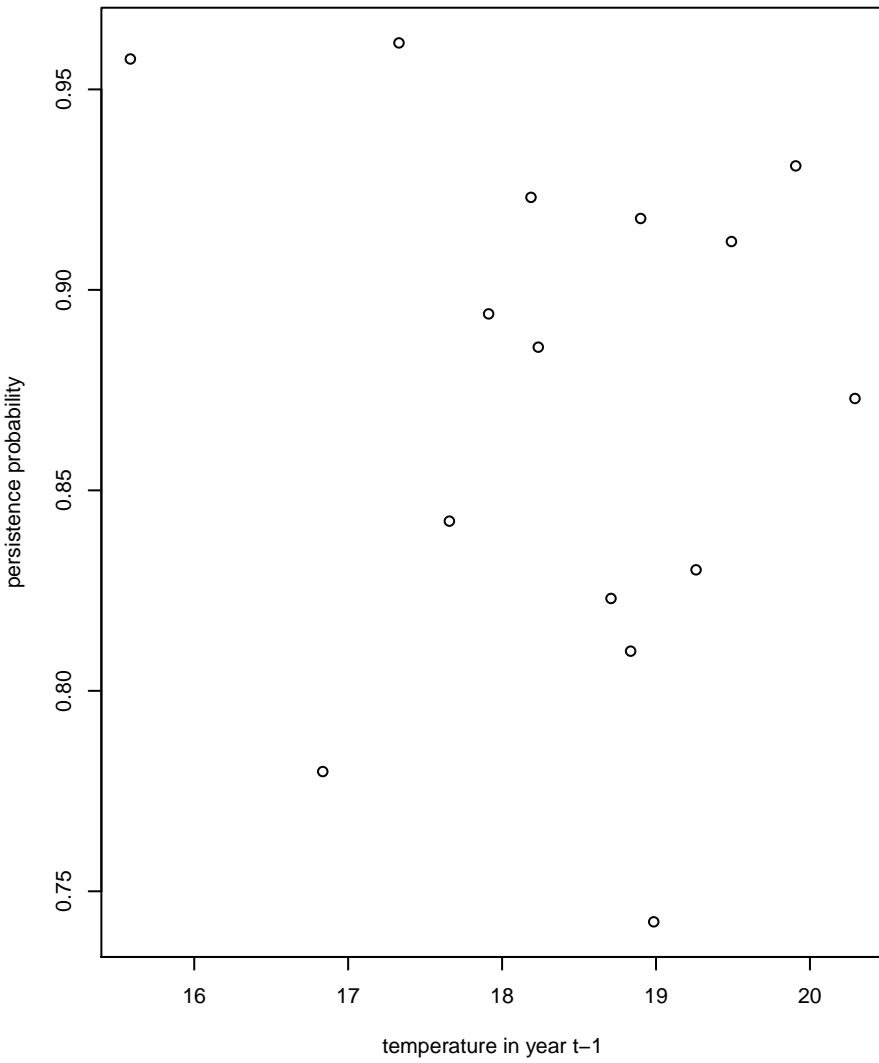

**Hipparchia semele**

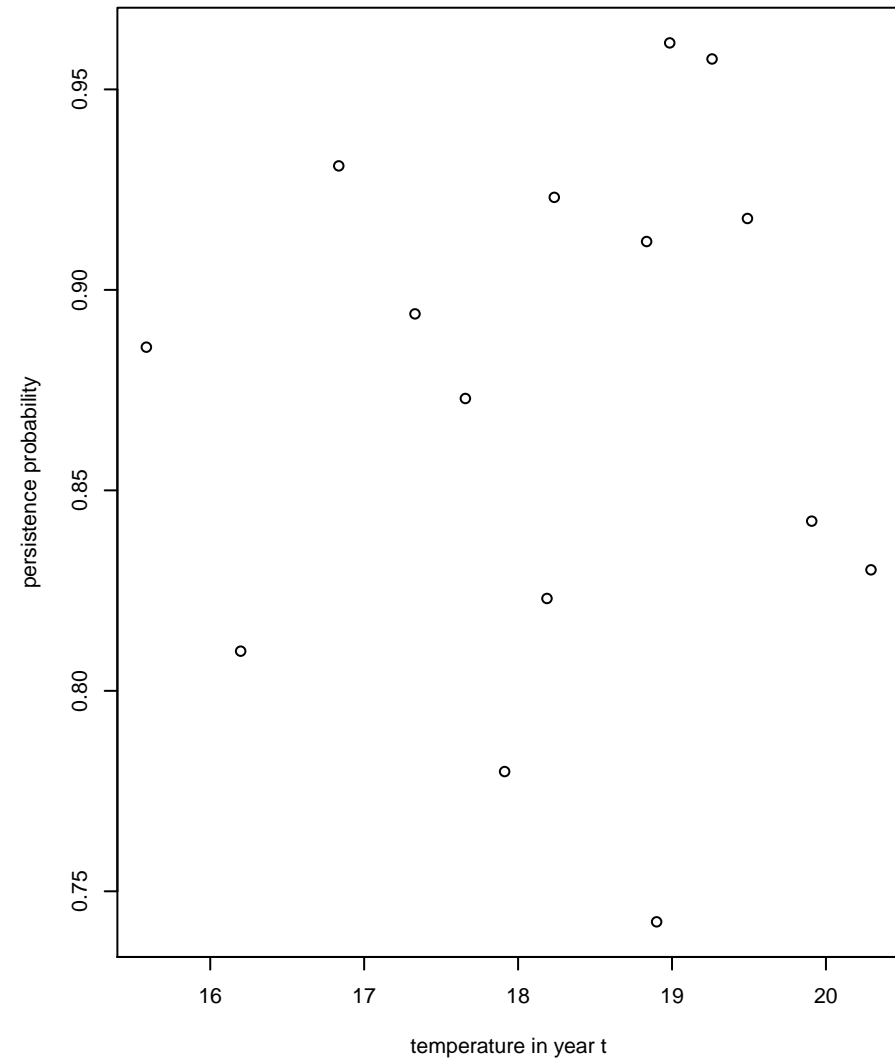

**Pyrgus malvae**

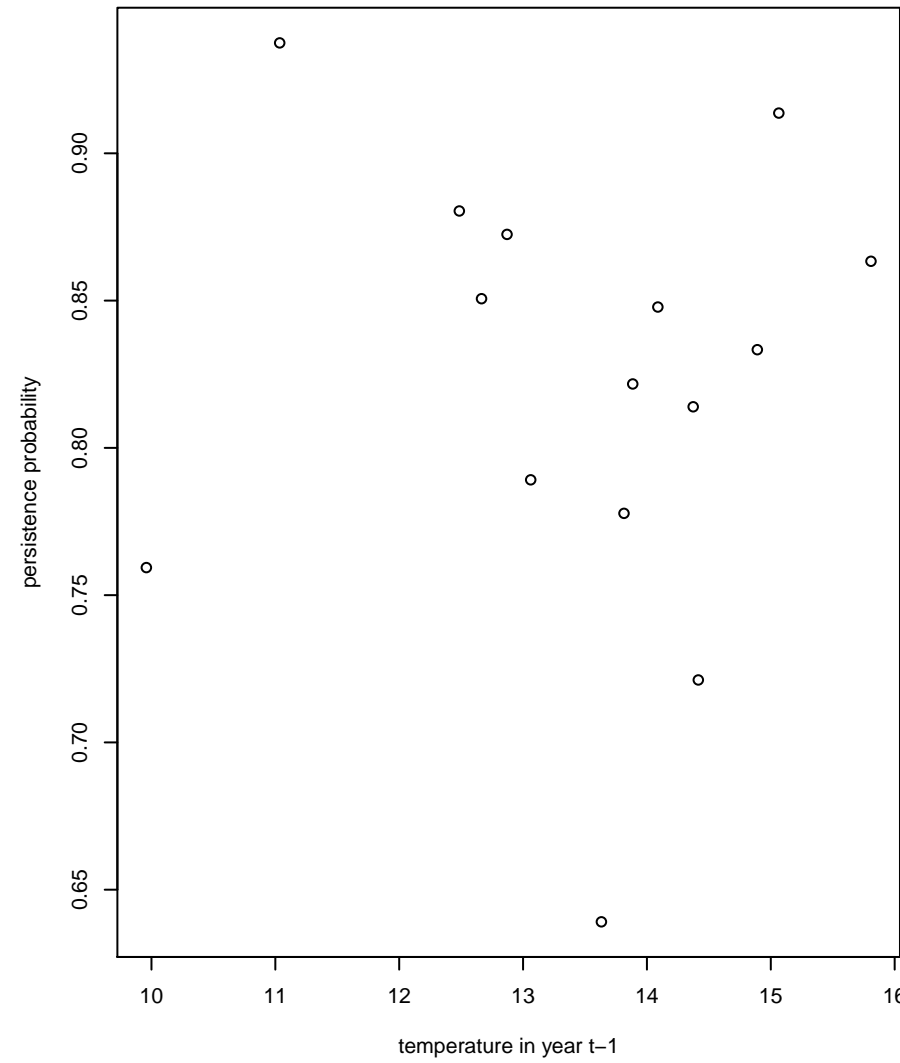

**Pyrgus malvae**

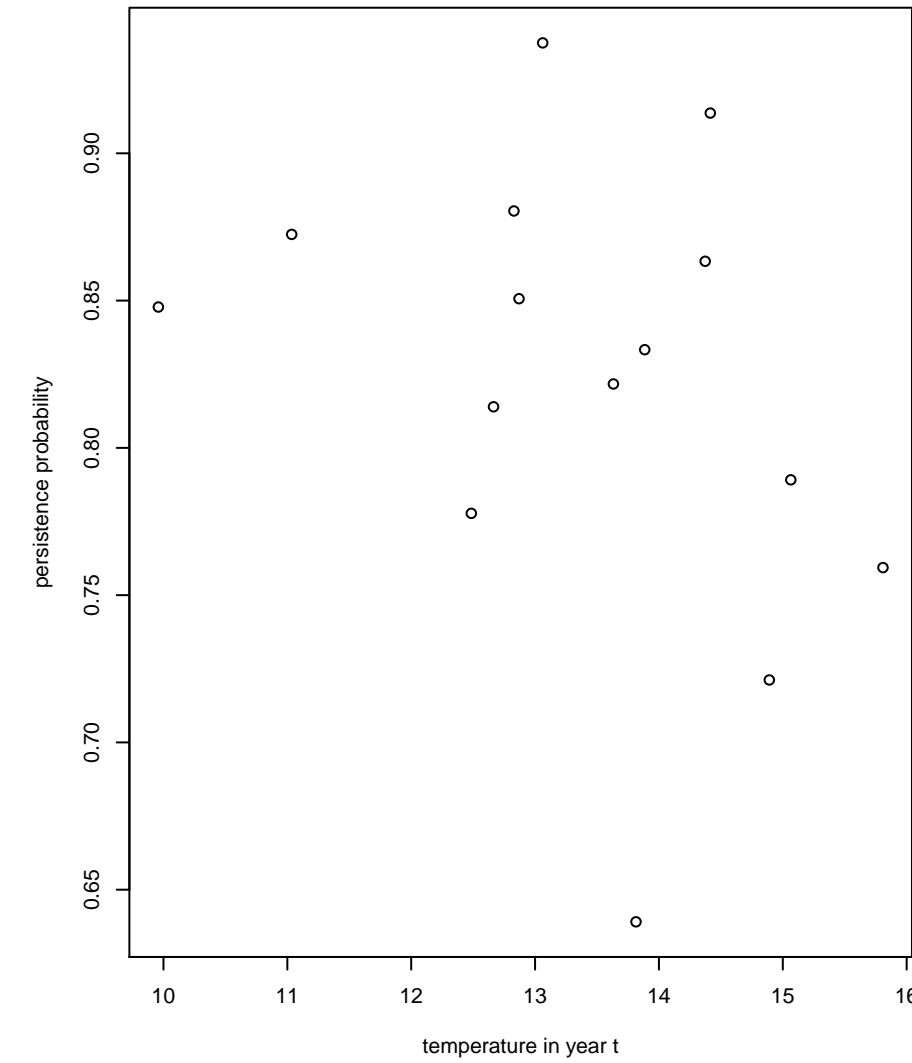

**Papilio machaon**

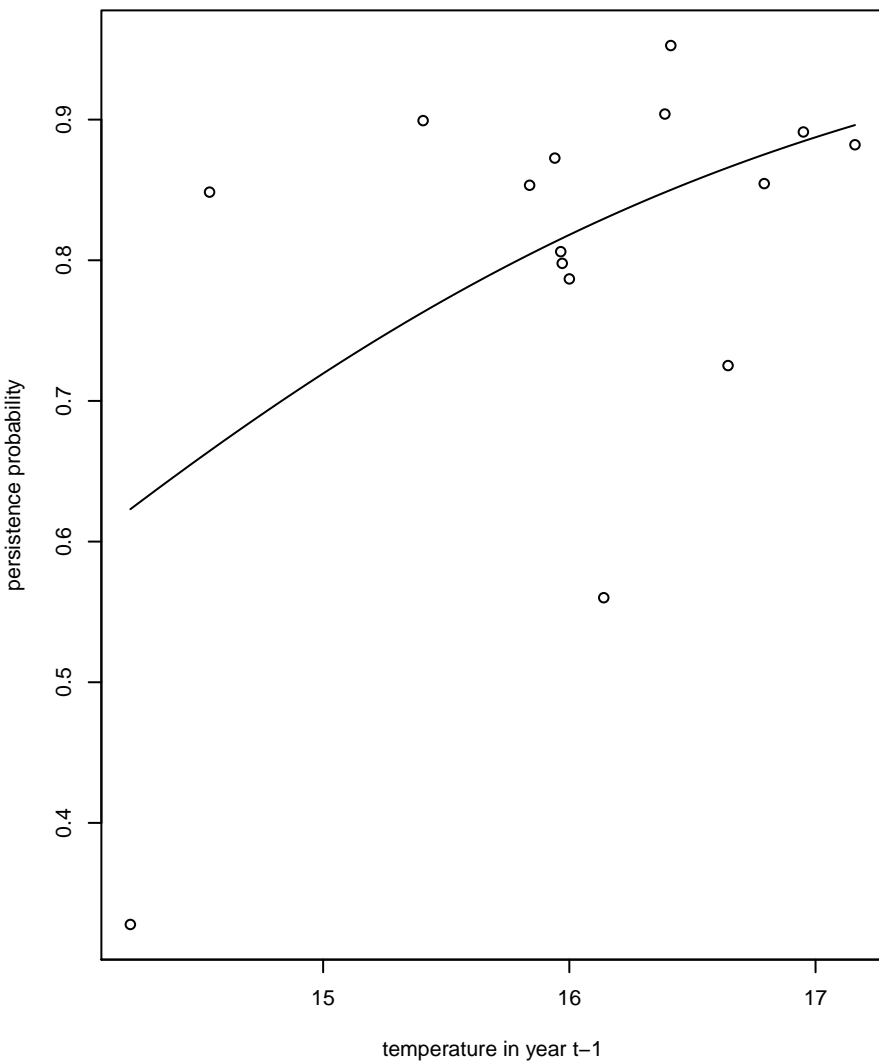

**Papilio machaon**

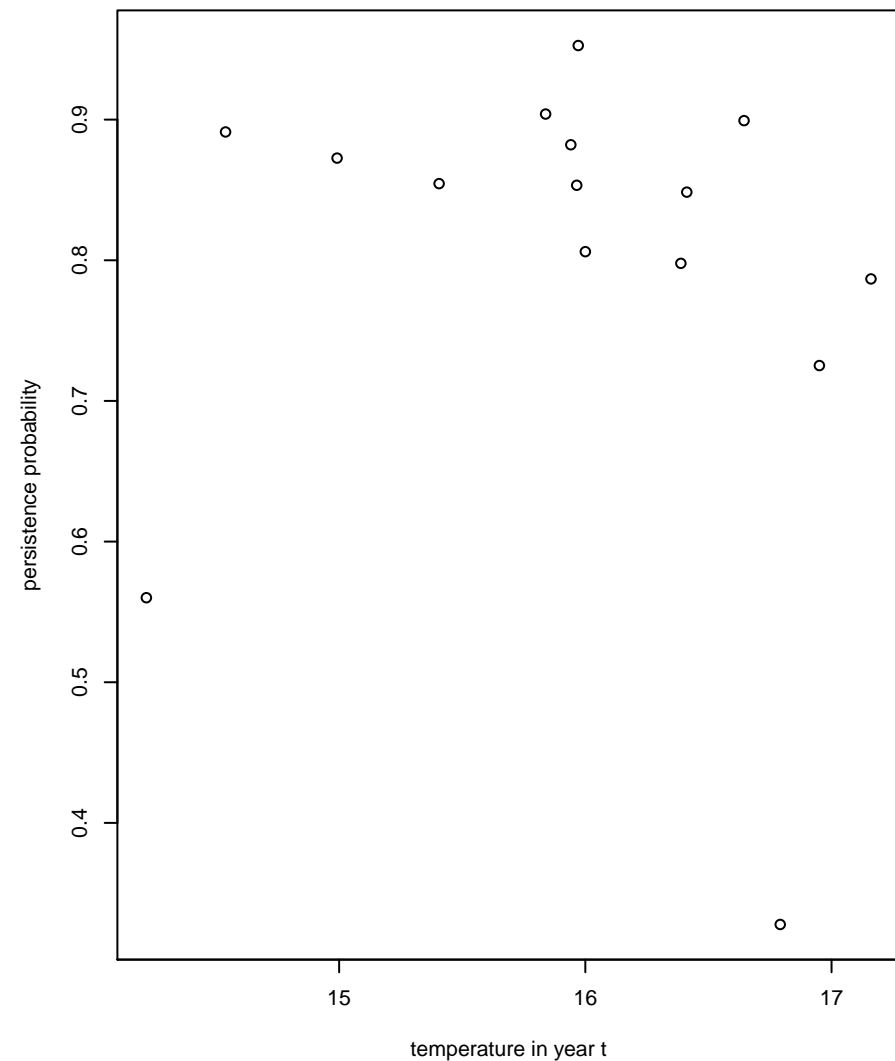

**Carterocephalus palaemon**

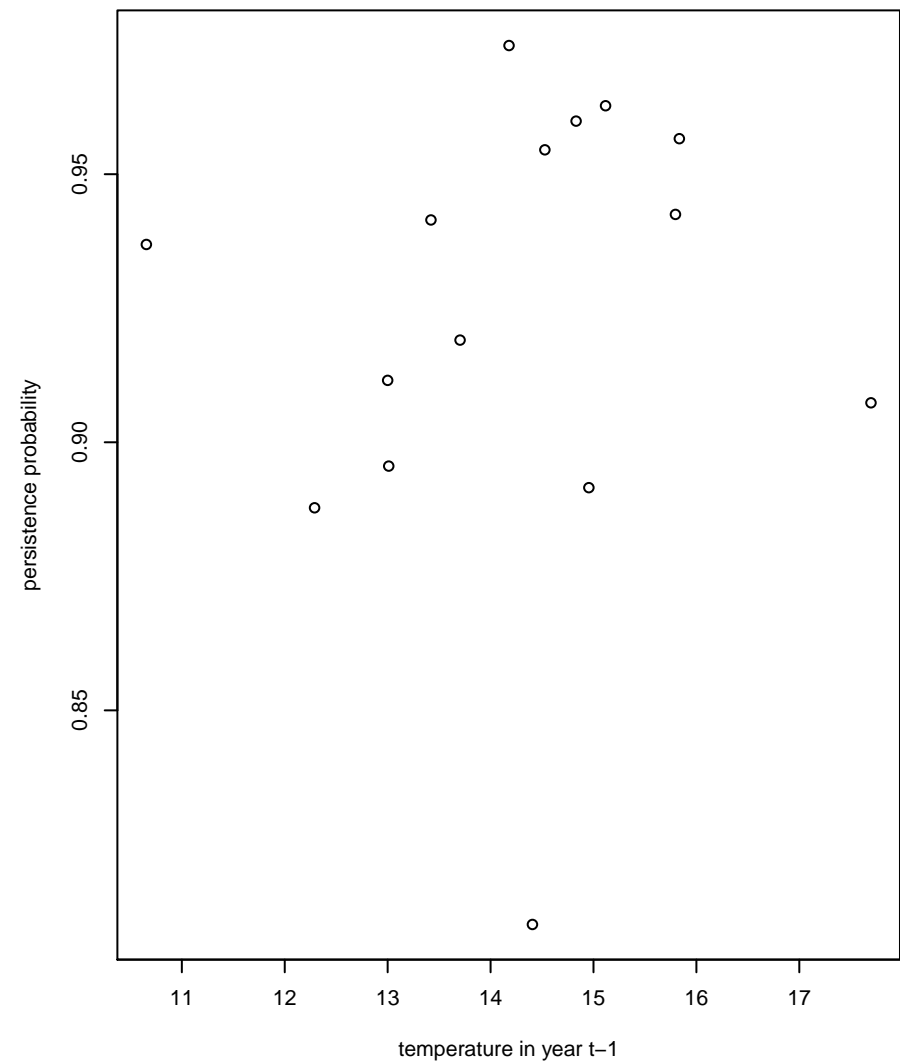

**Carterocephalus palaemon**

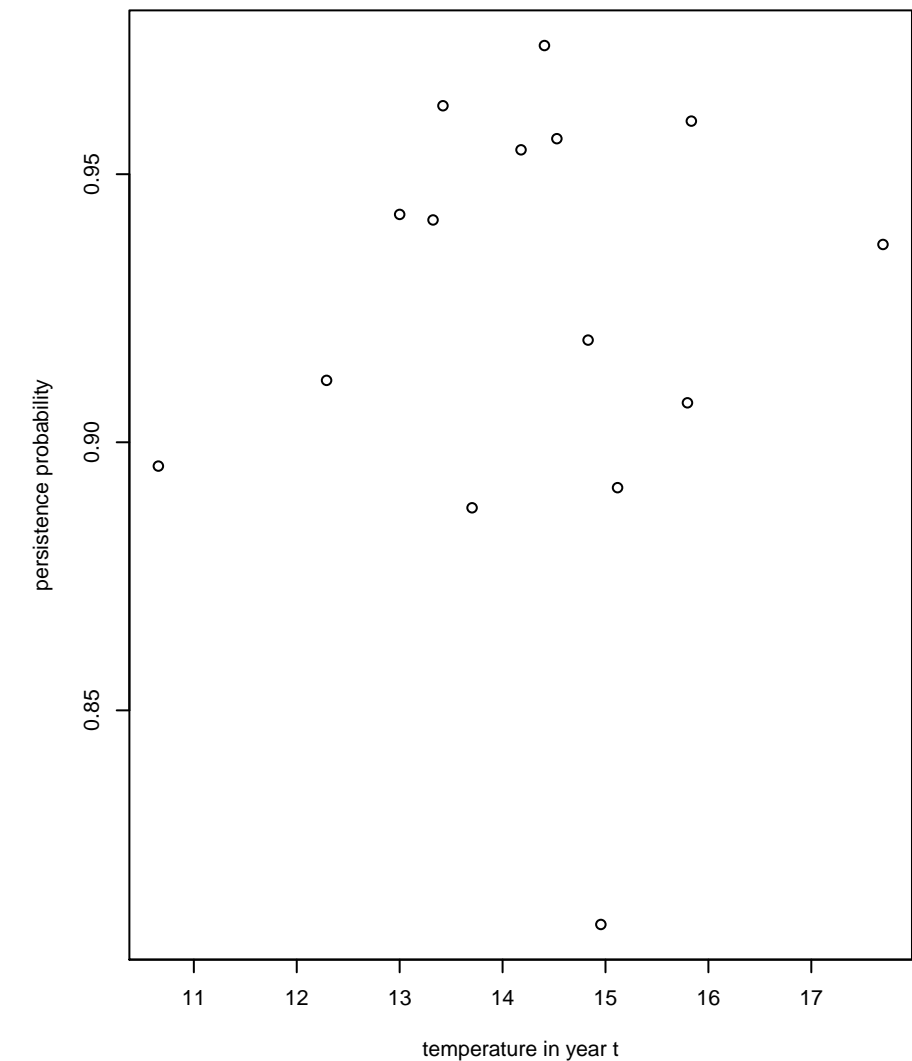

**Gonepteryx rhamni**

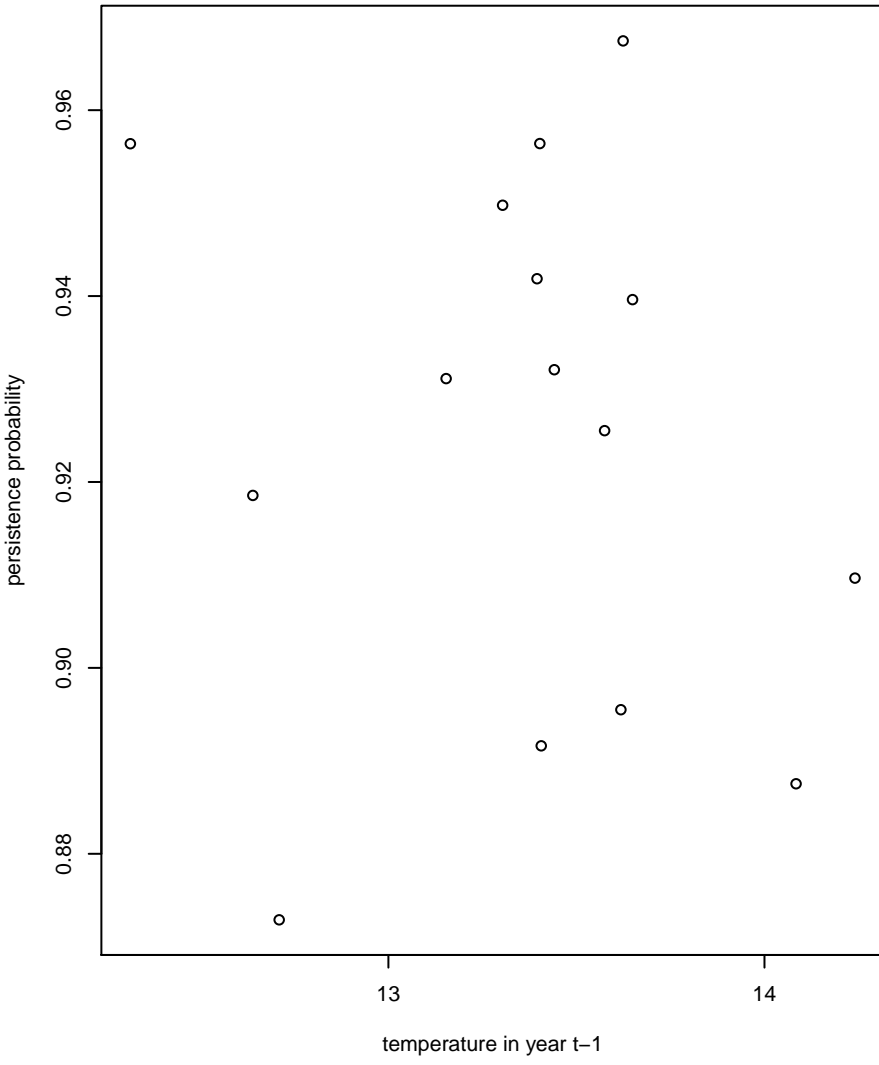

**Gonepteryx rhamni**

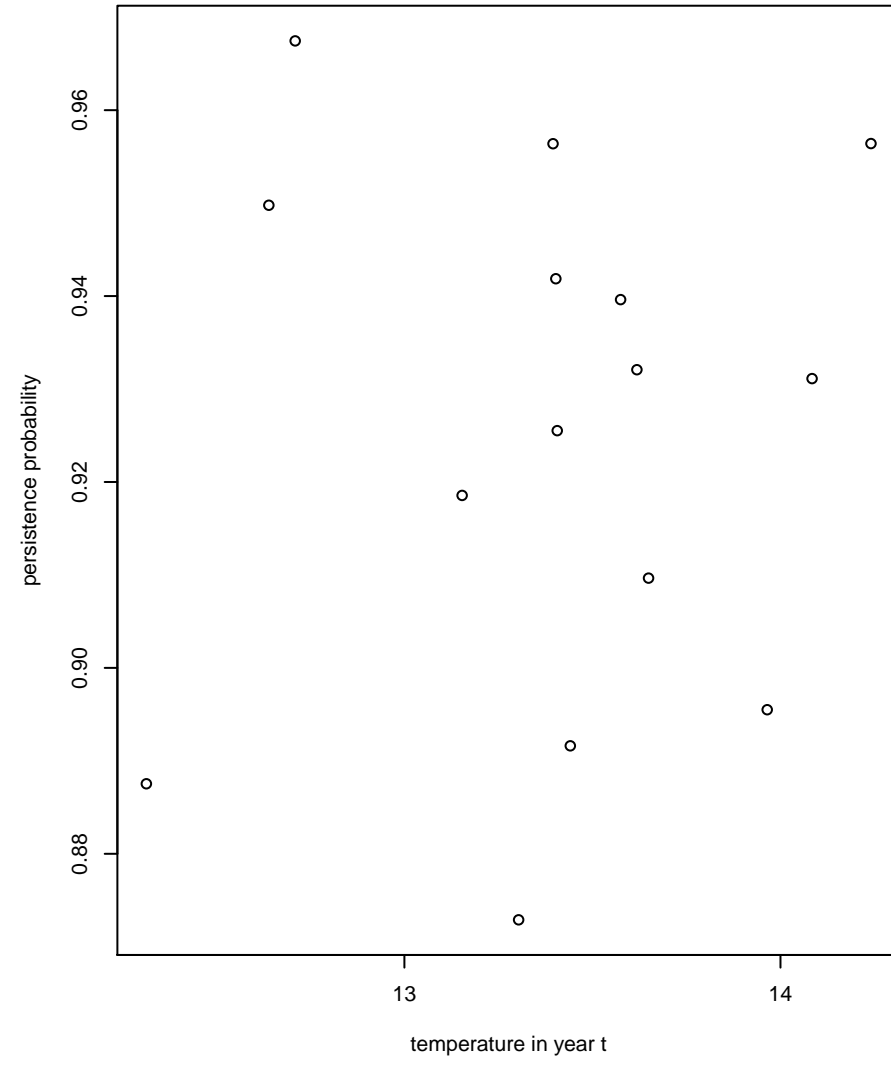

**Pieris brassicae**

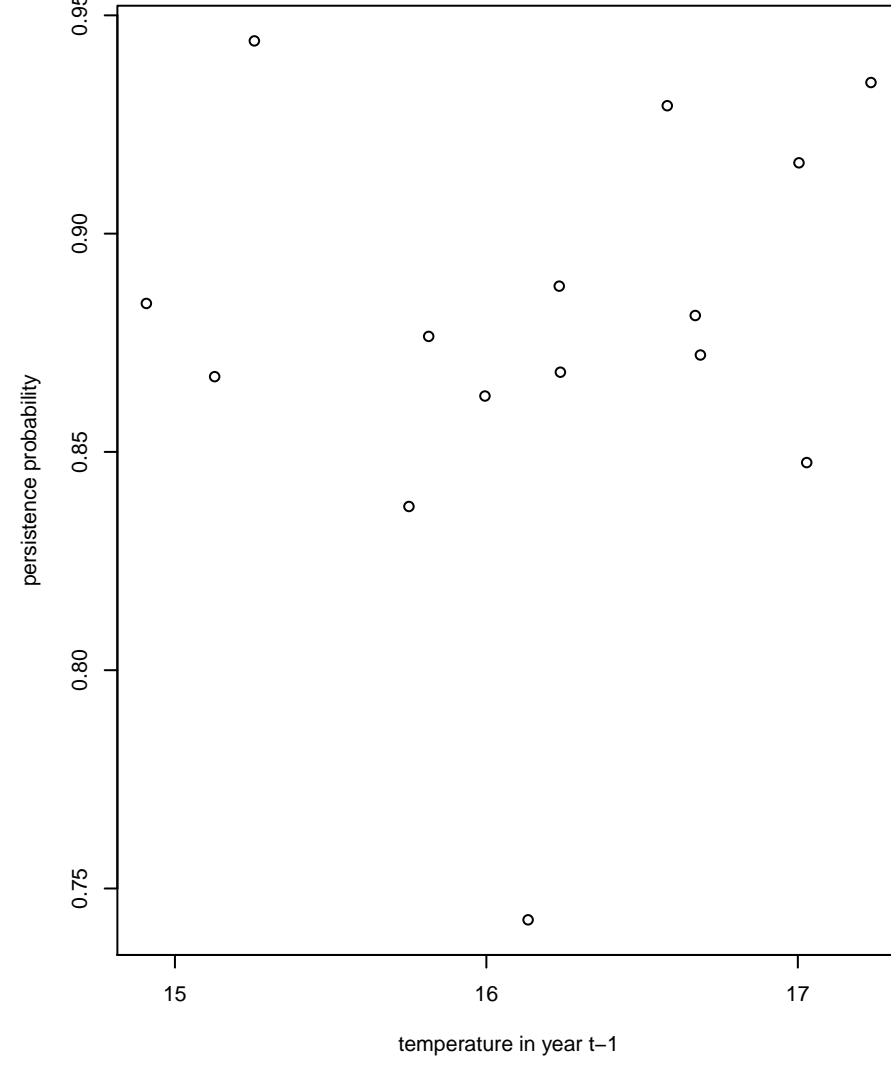

**Pieris brassicae**

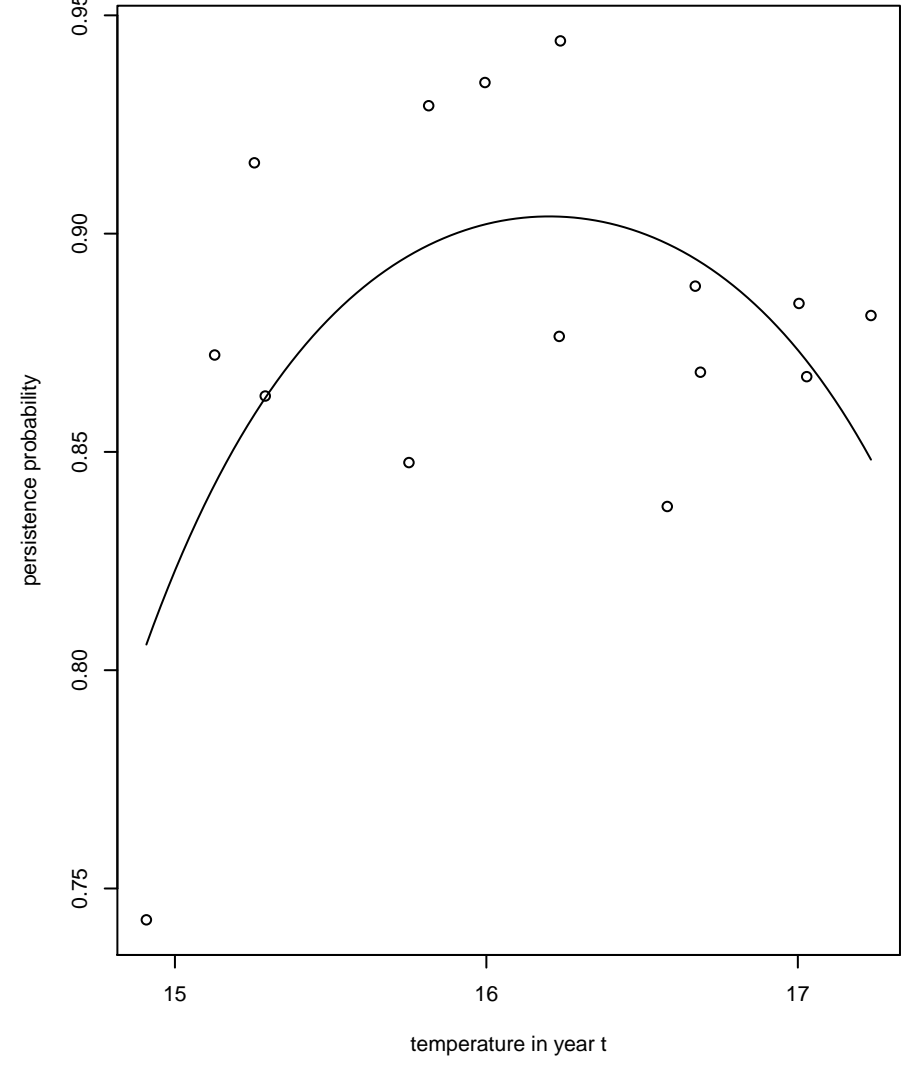

**Thymelicus sylvestris**

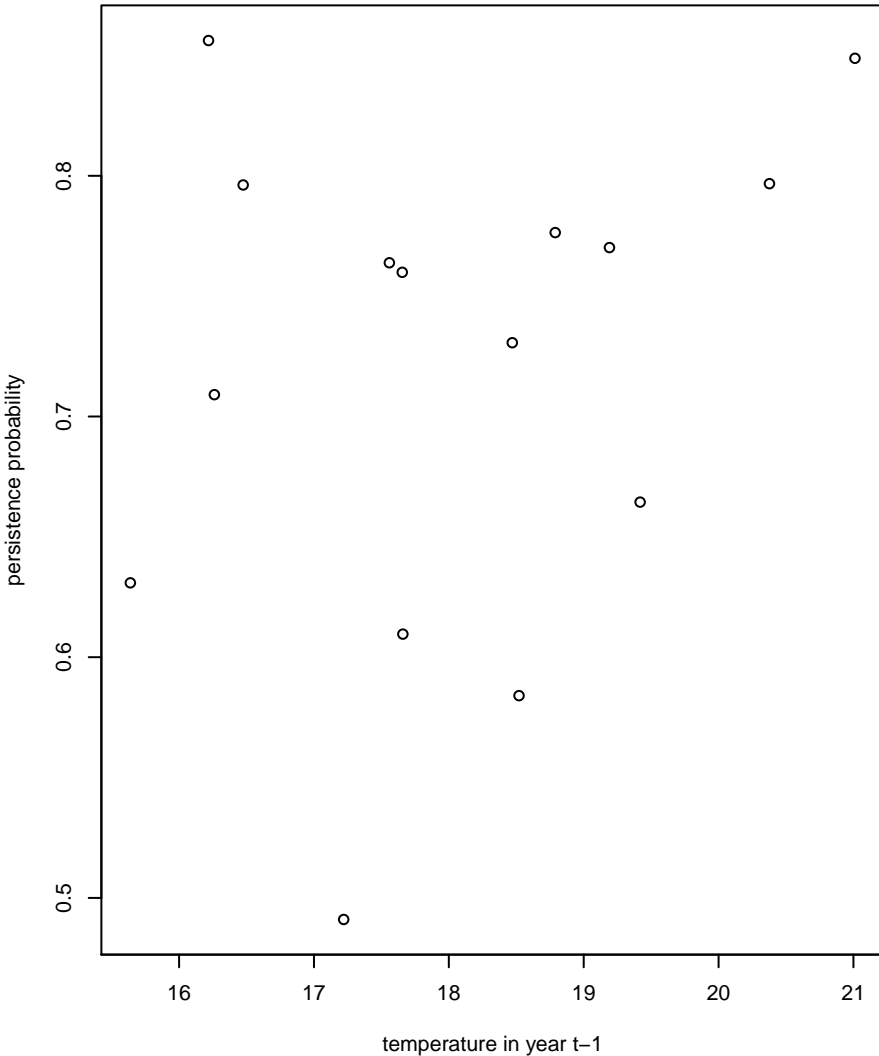

**Thymelicus sylvestris**

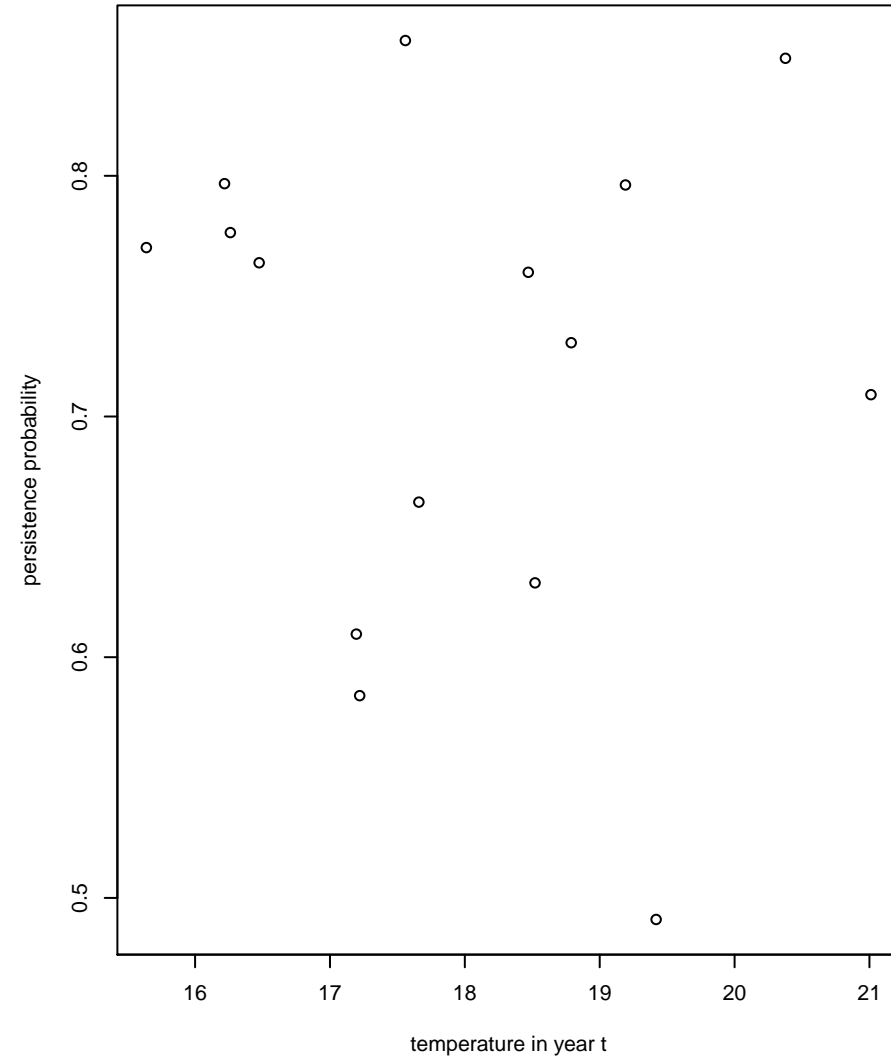

**Pieris rapae**

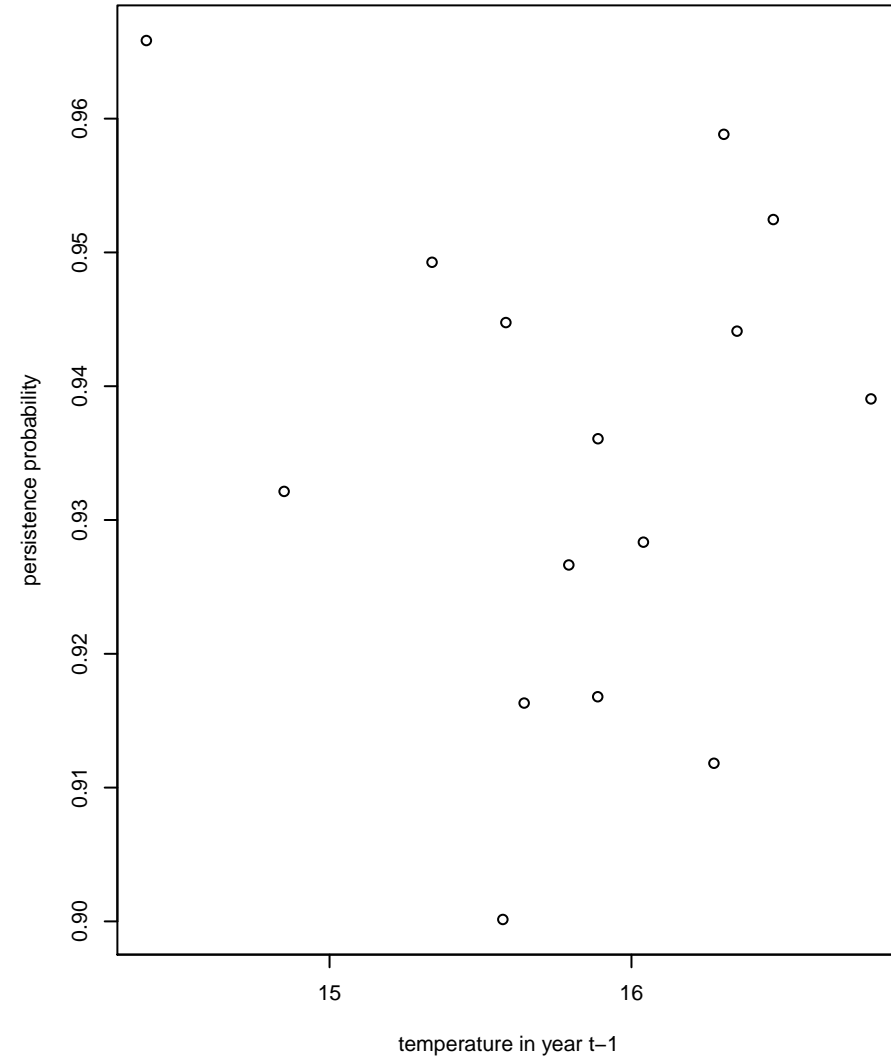

**Pieris rapae**

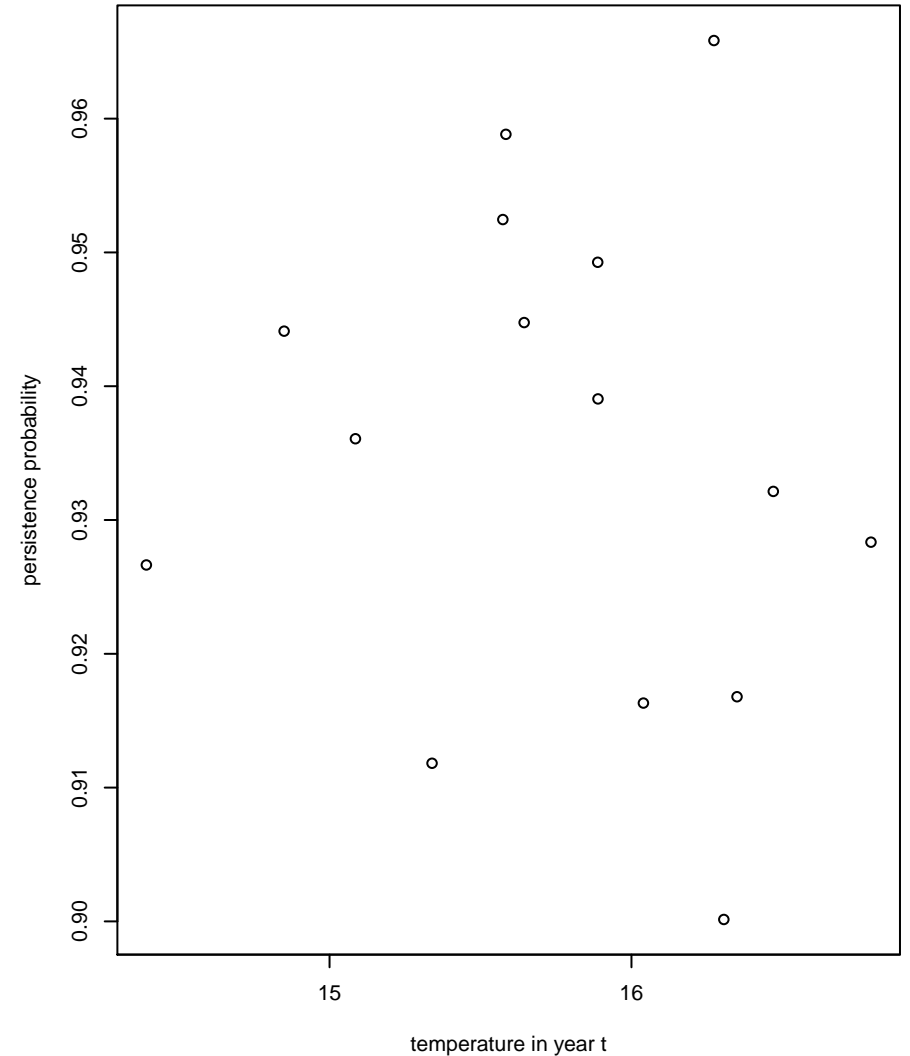

**Pieris napi**

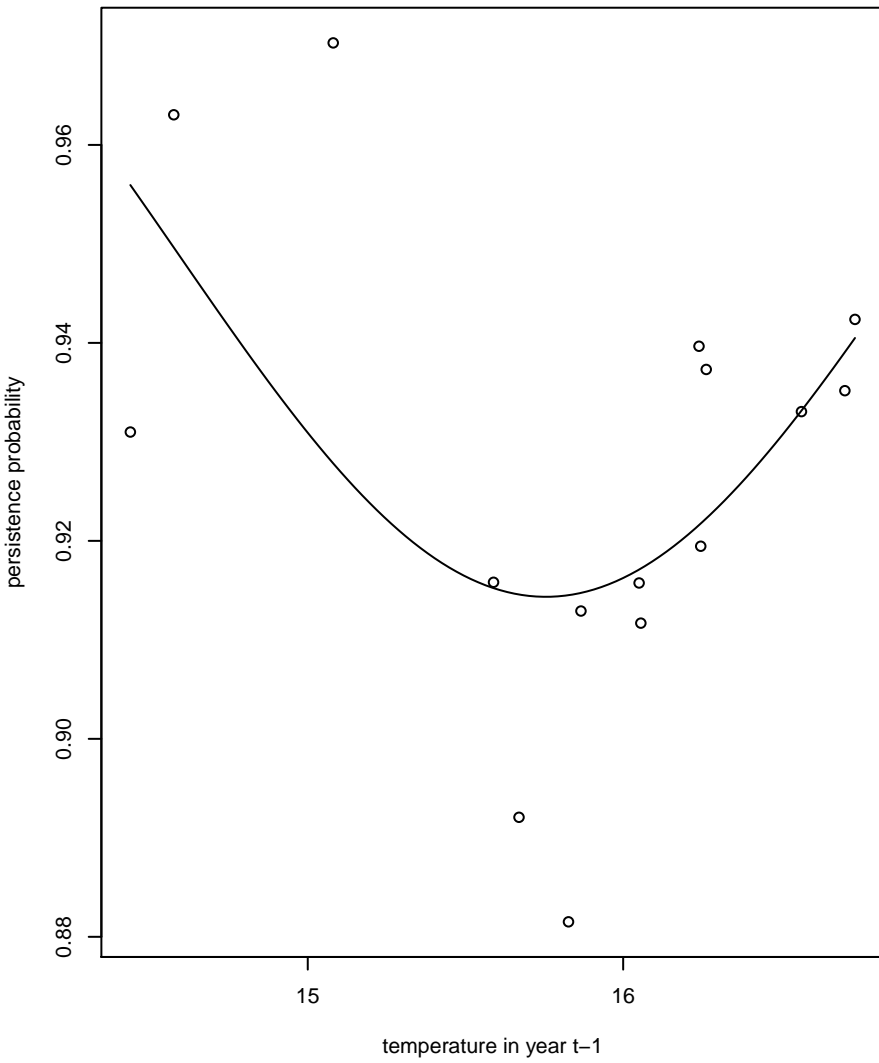

**Pieris napi**

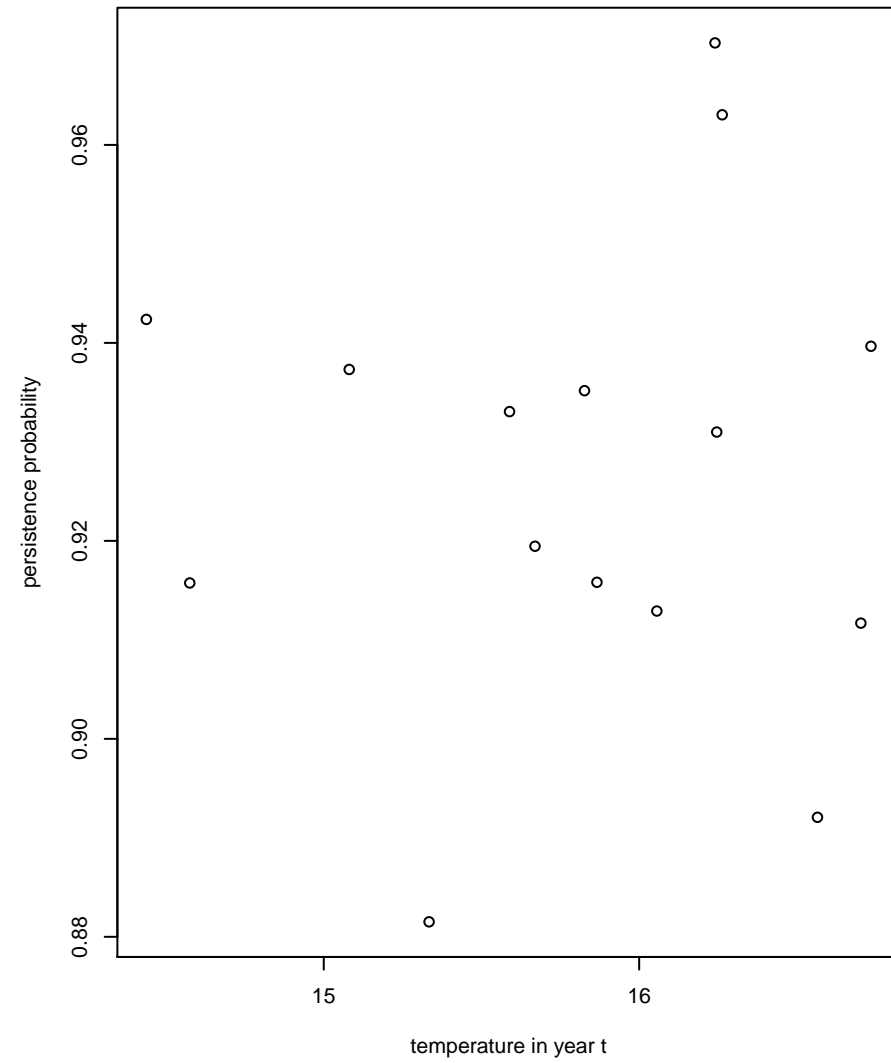

**Anthocharis cardamines**

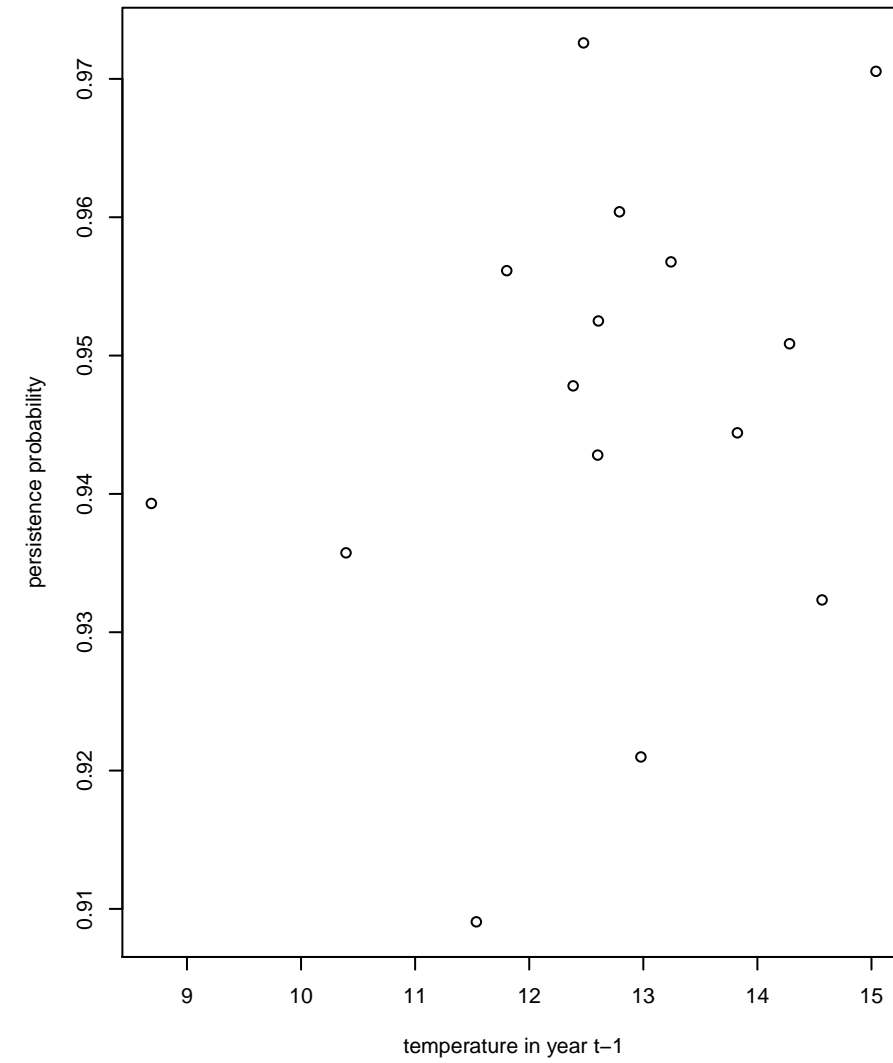

**Anthocharis cardamines**

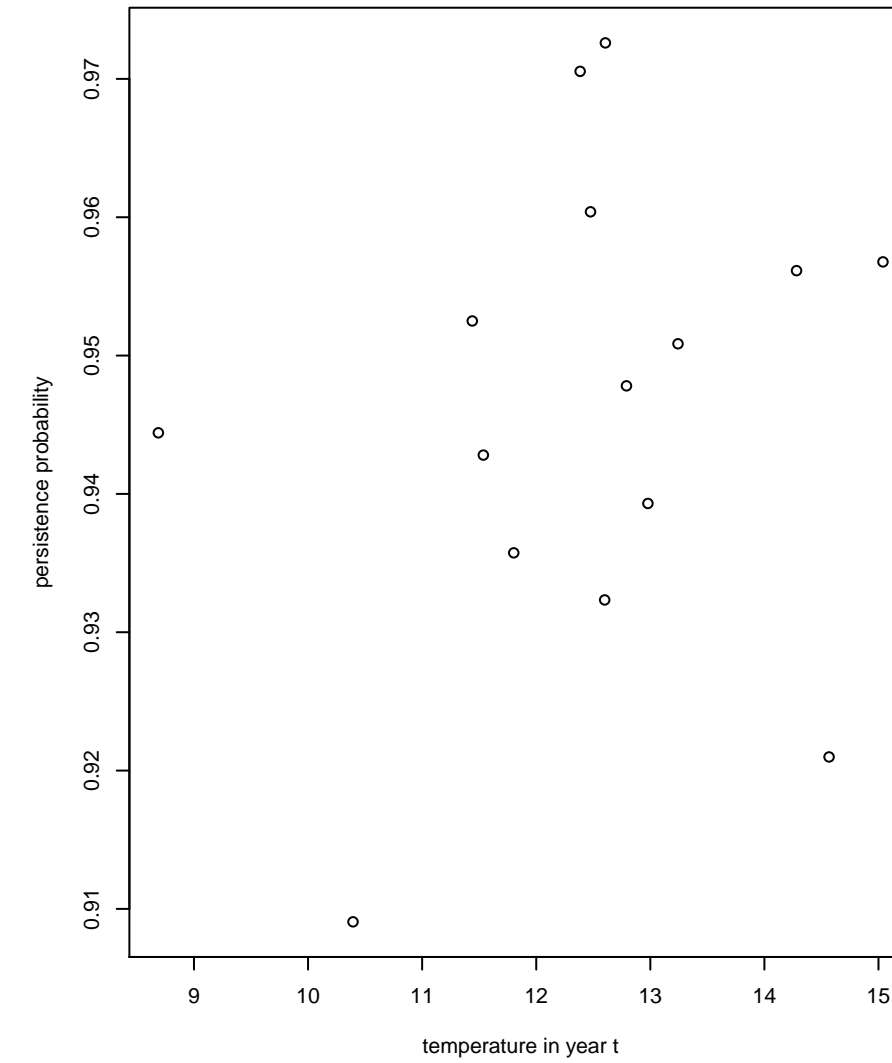

**Callophrys rubi**

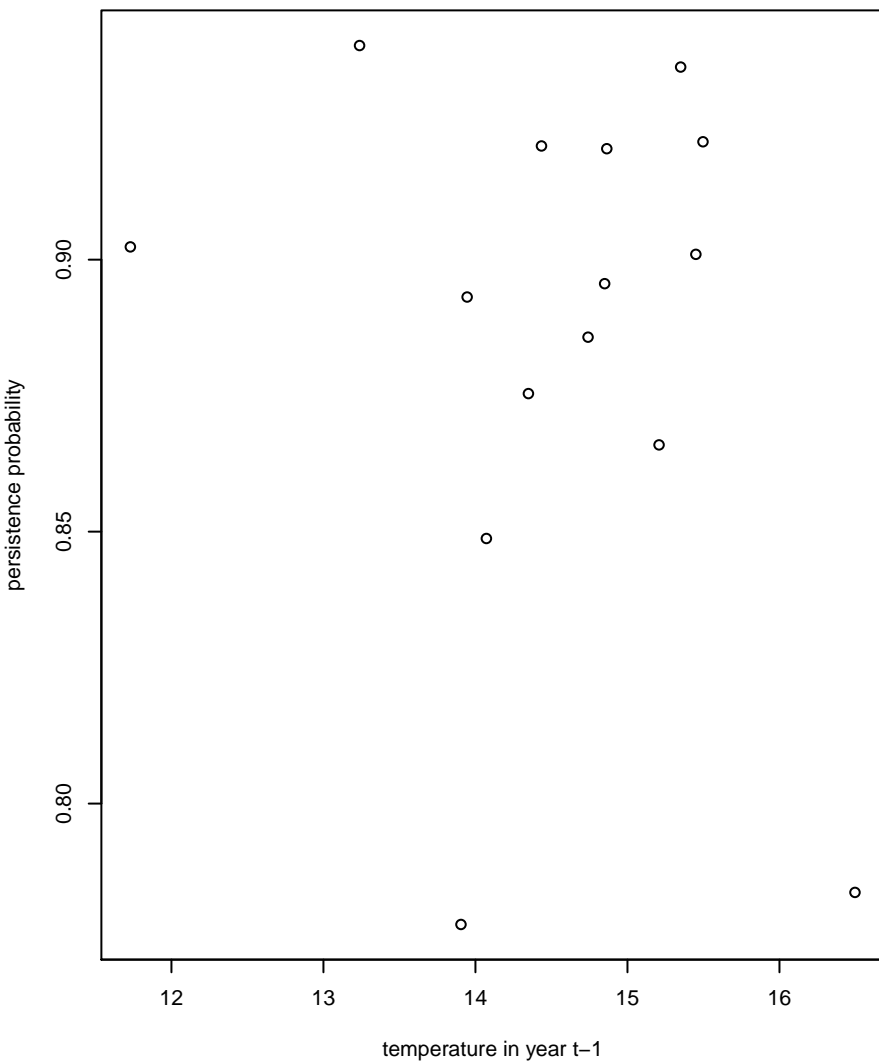

**Callophrys rubi**

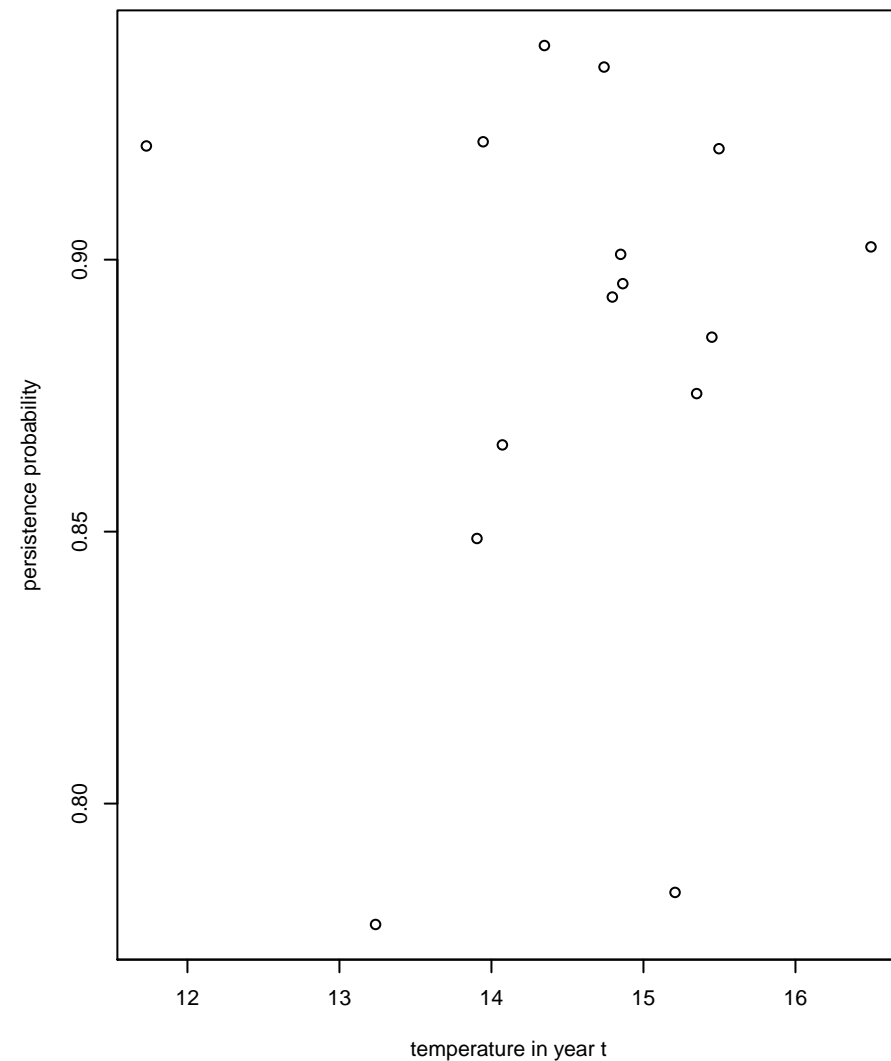

**Favonius quercus**

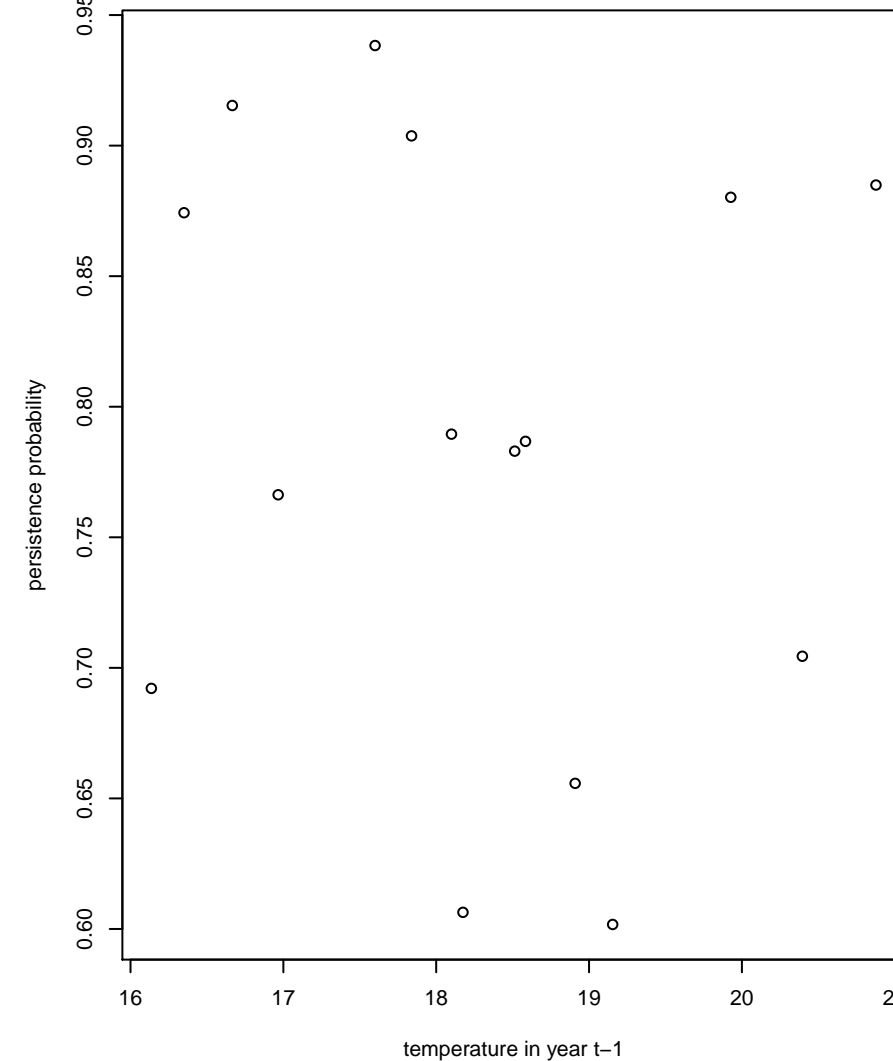

**Favonius quercus**

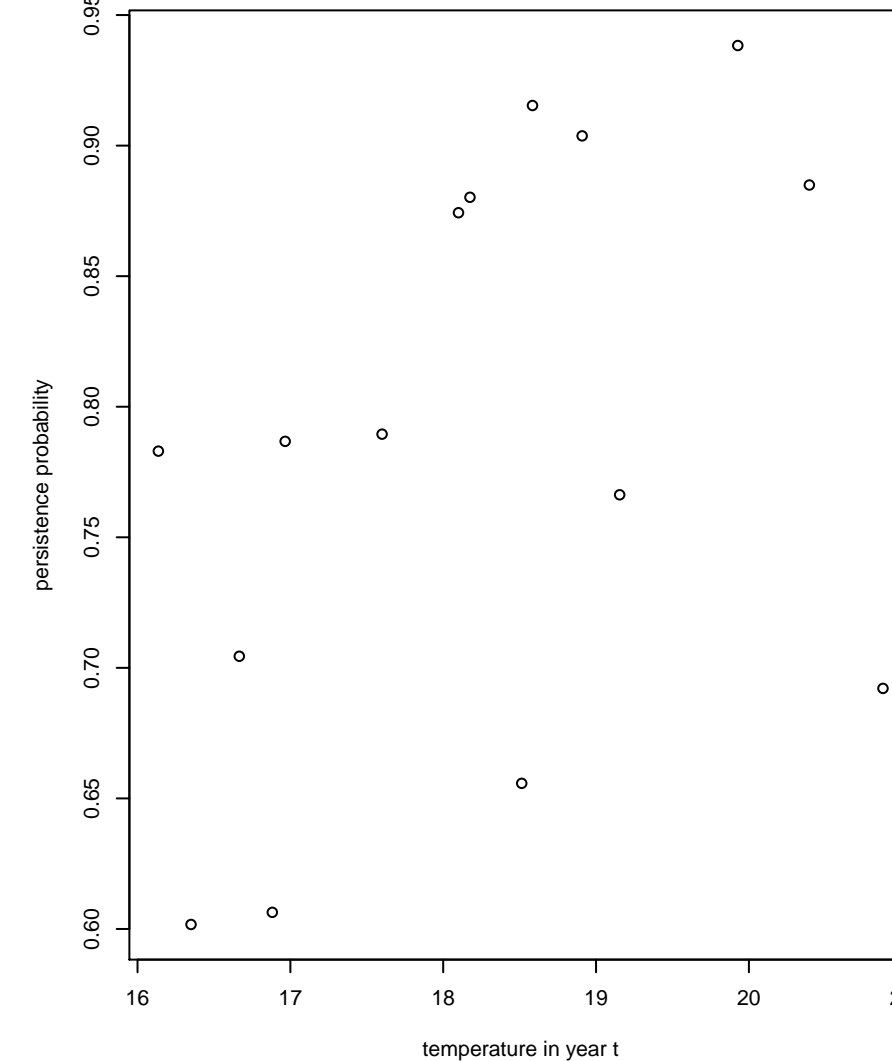

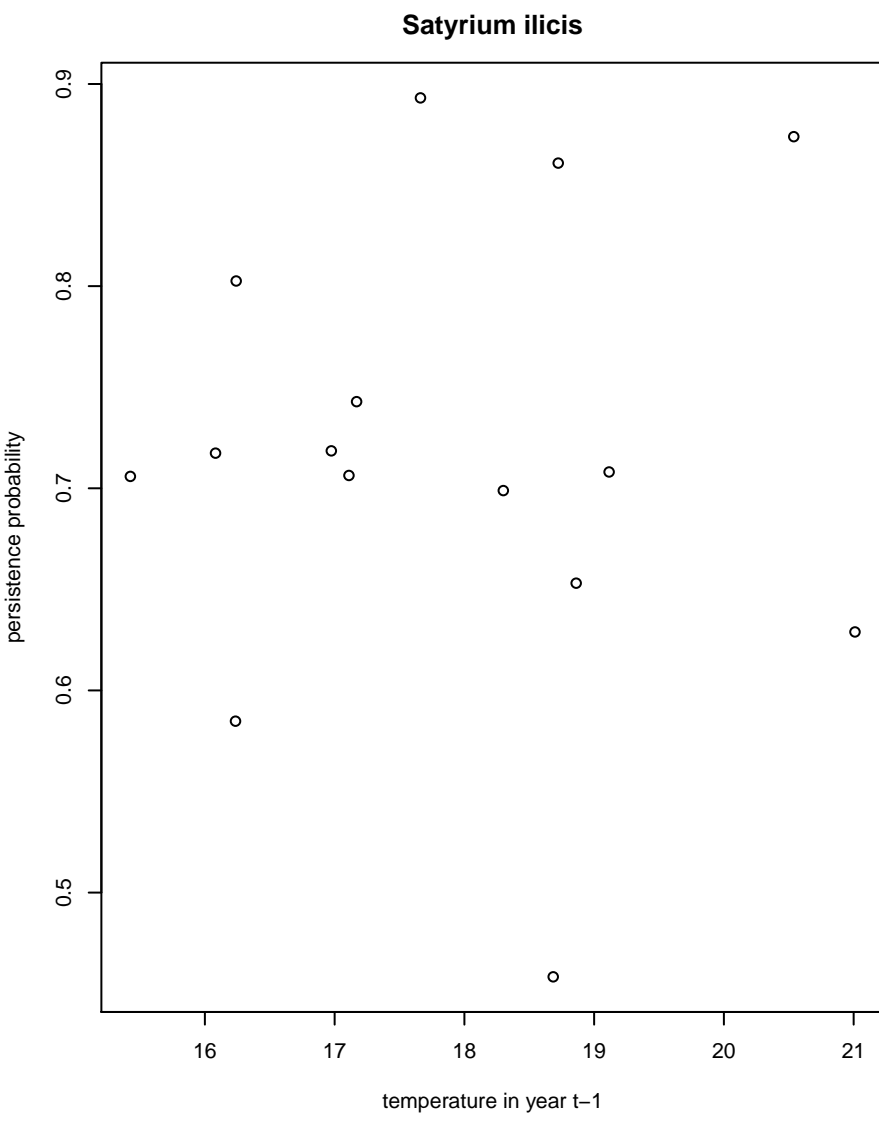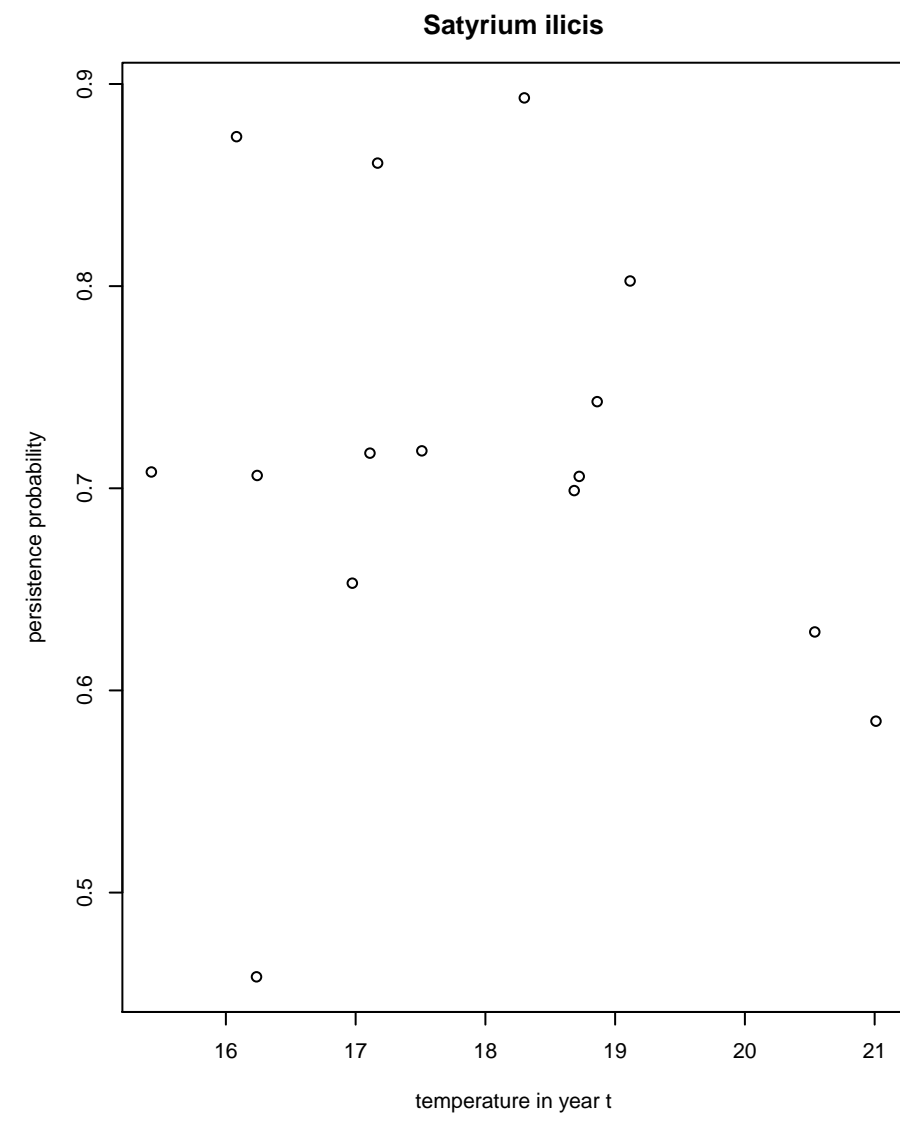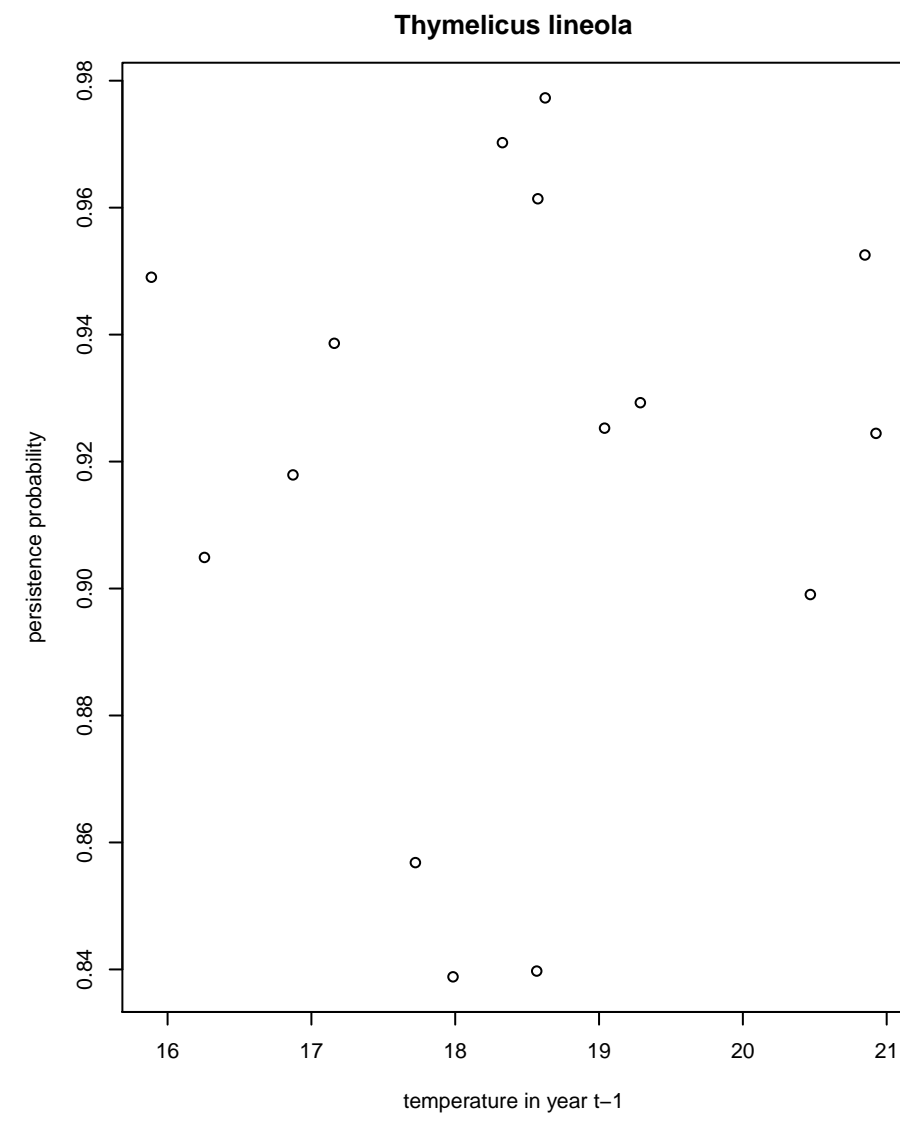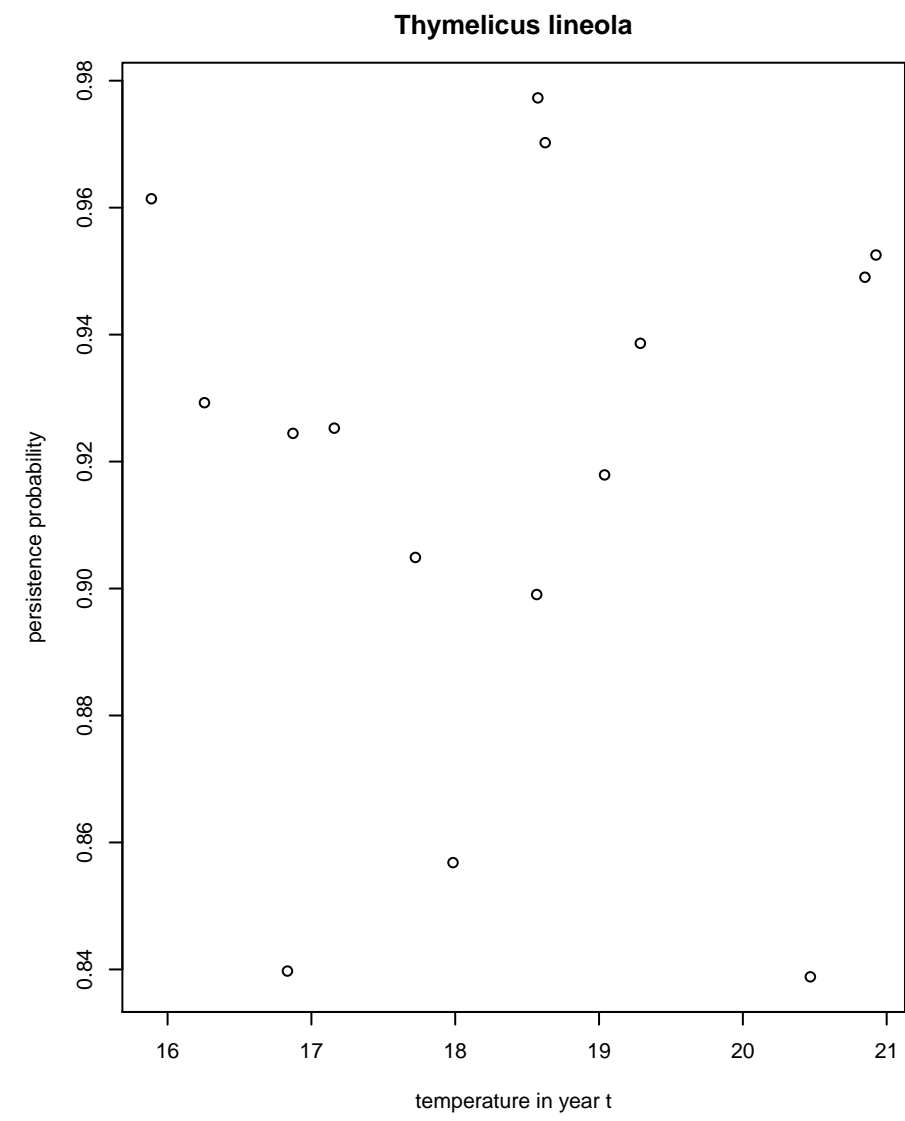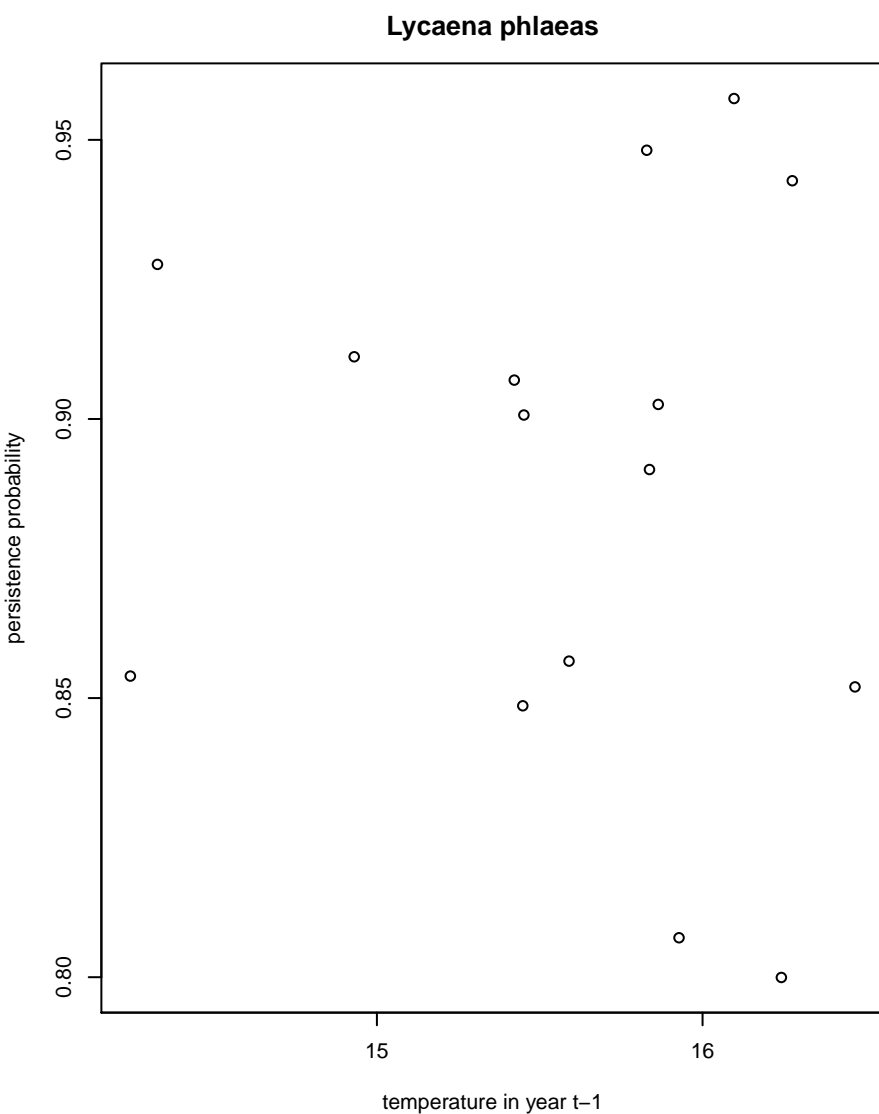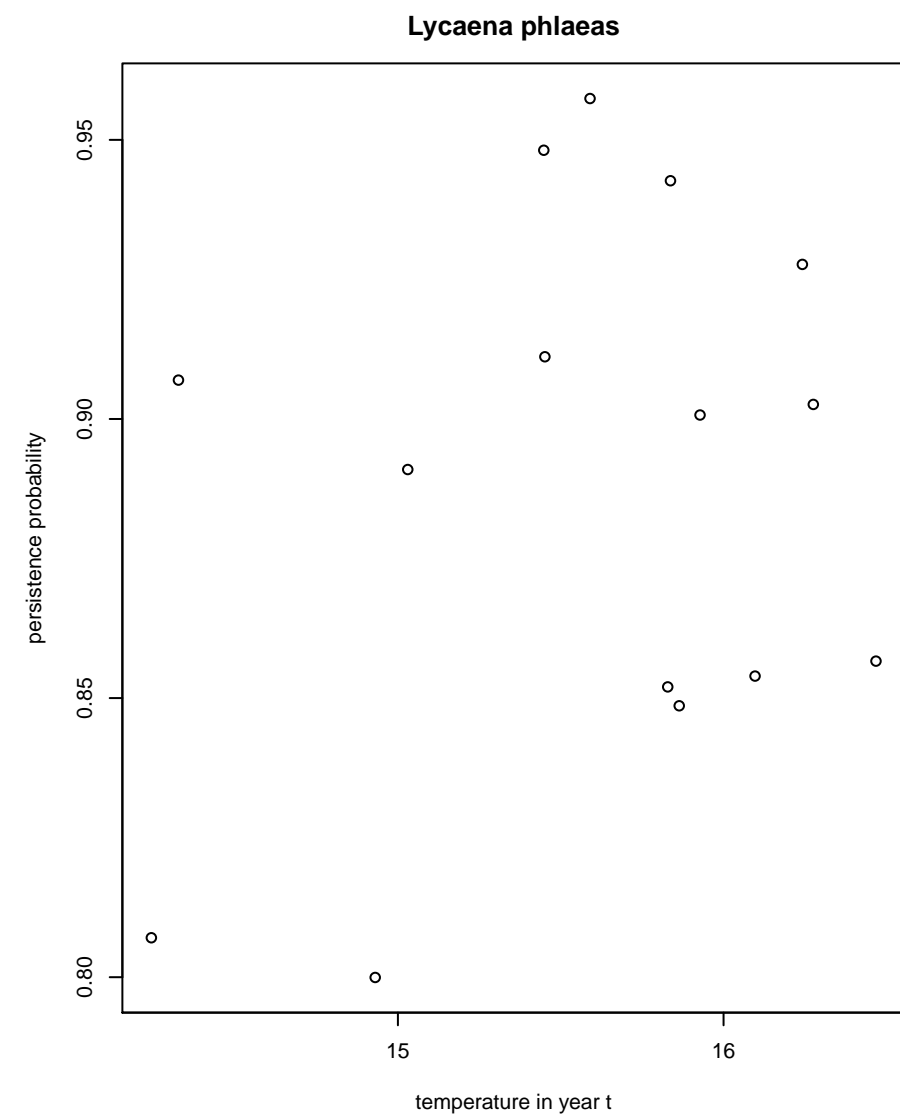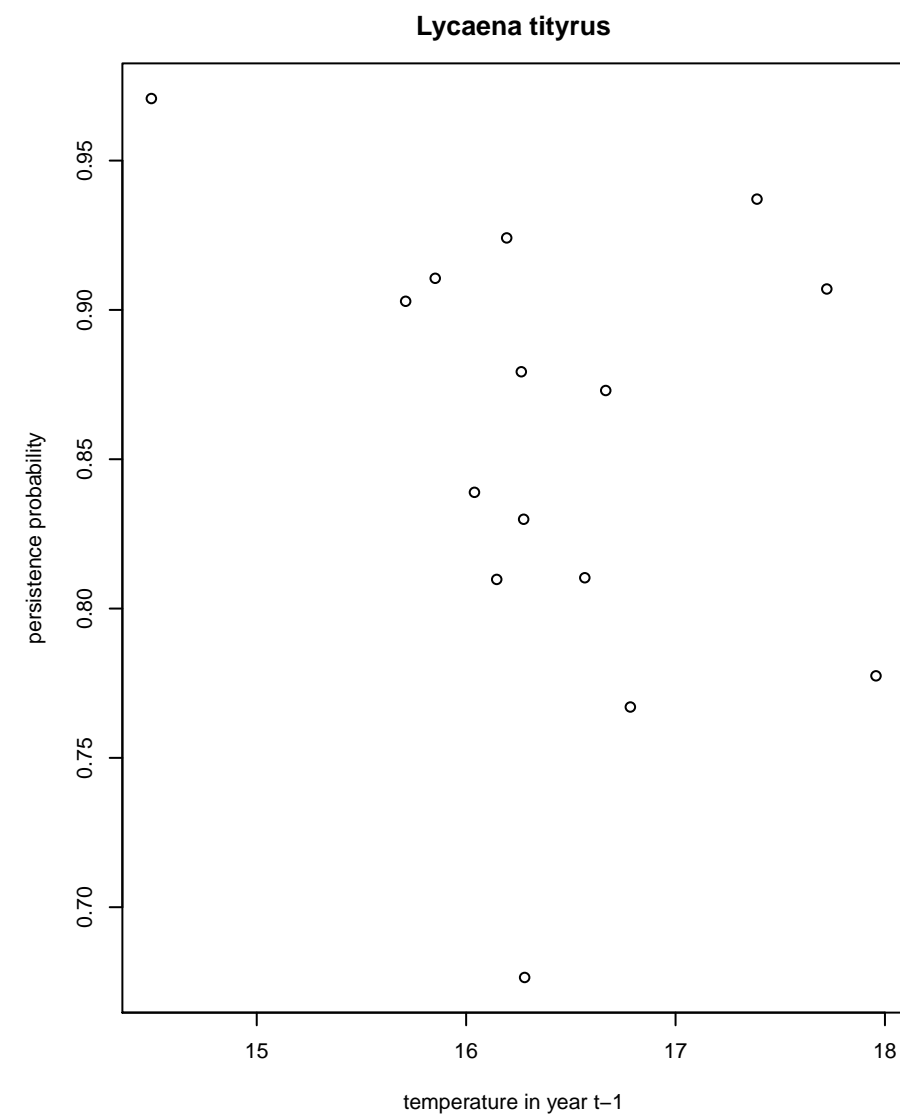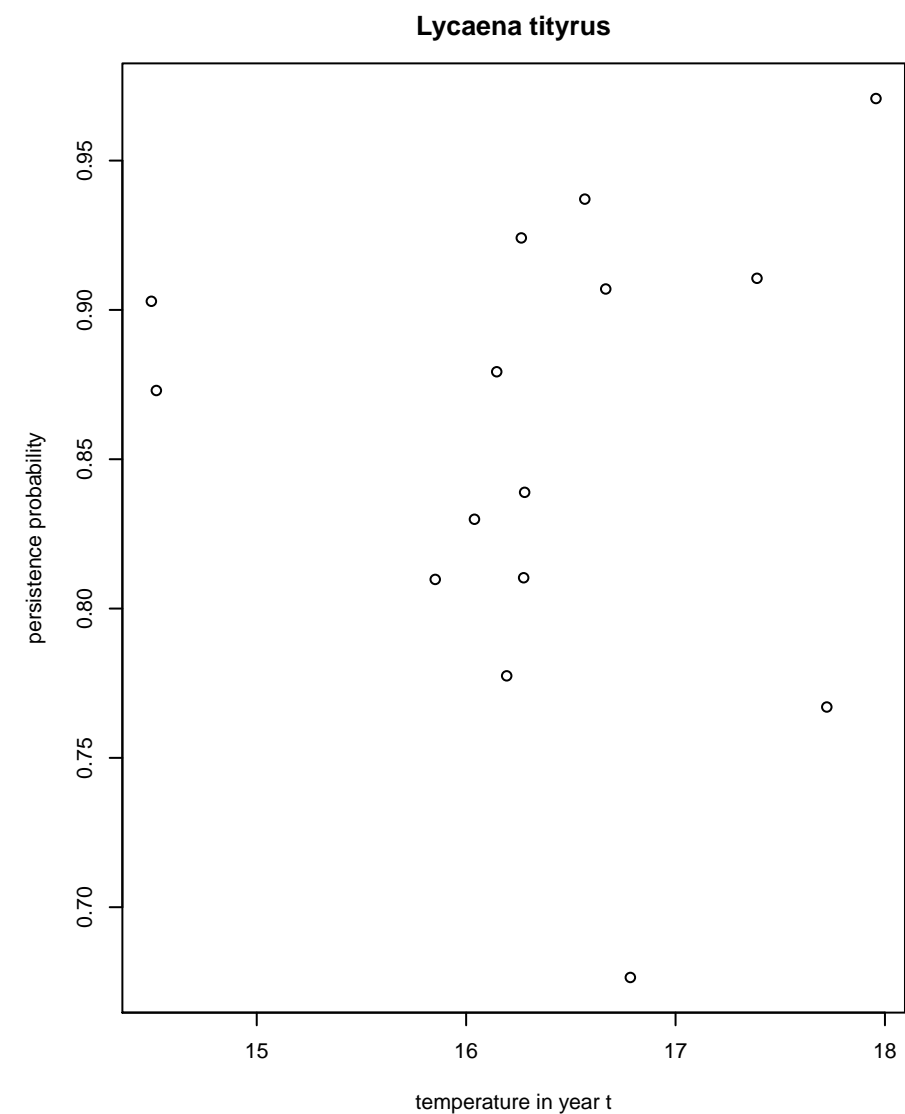

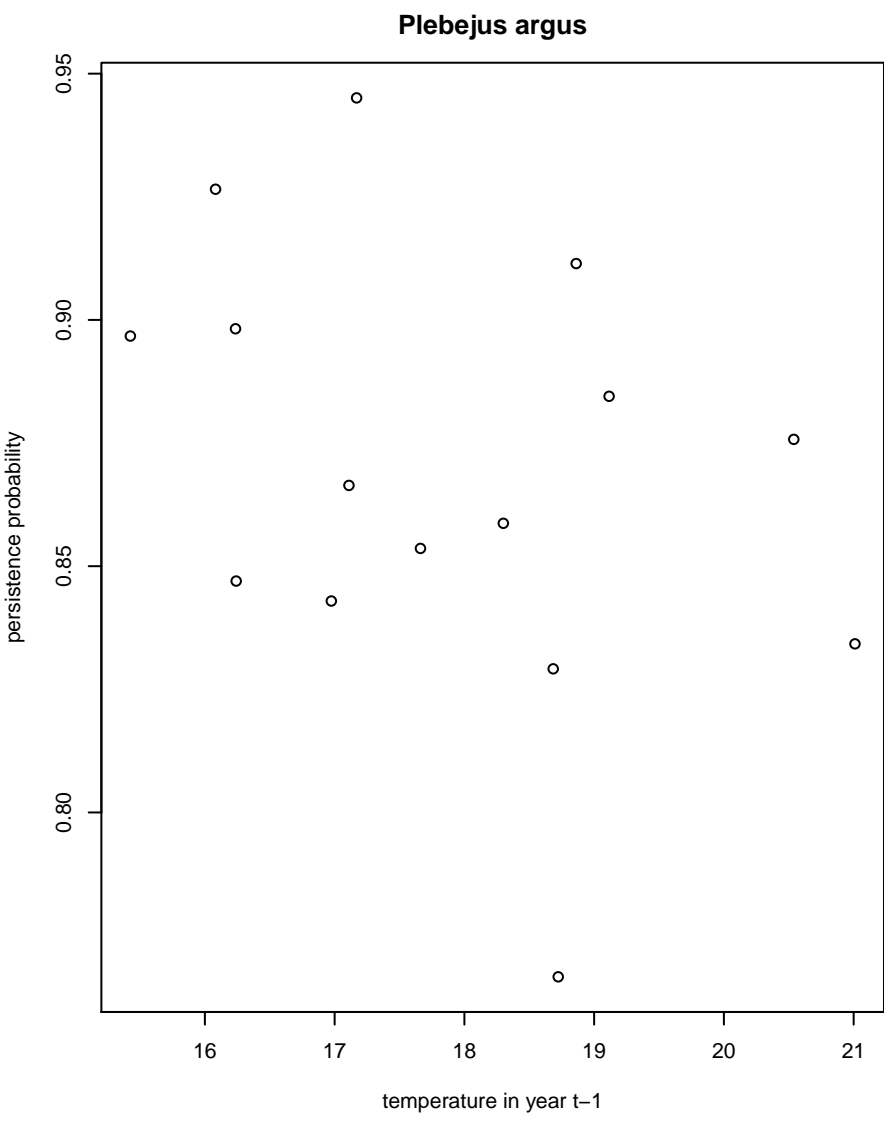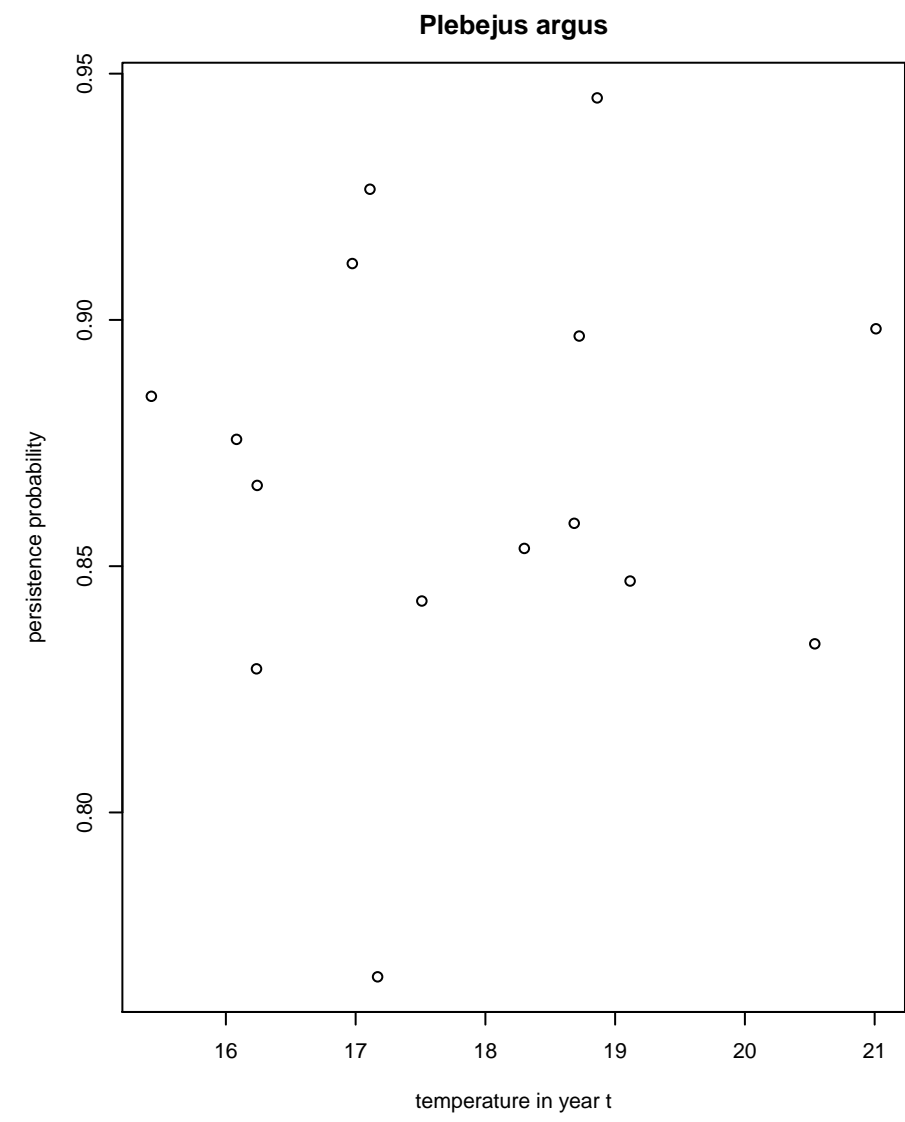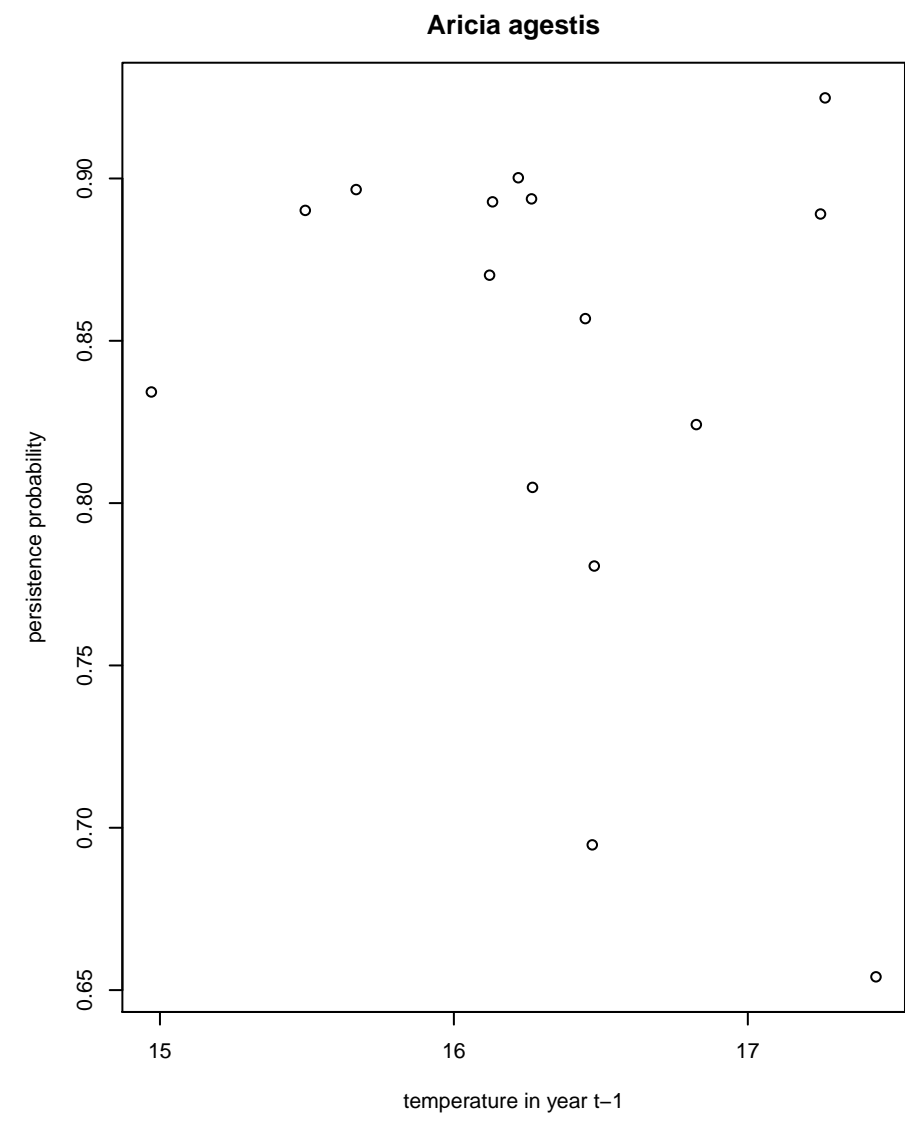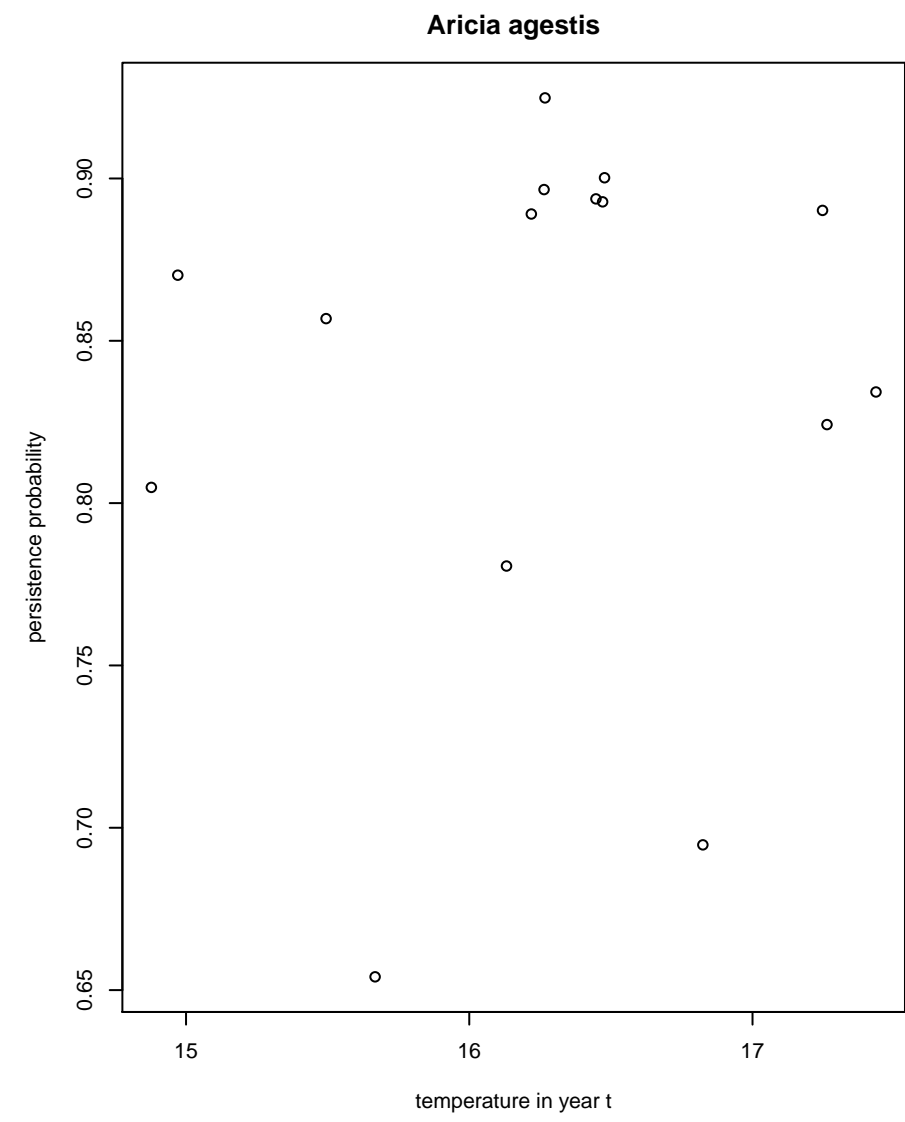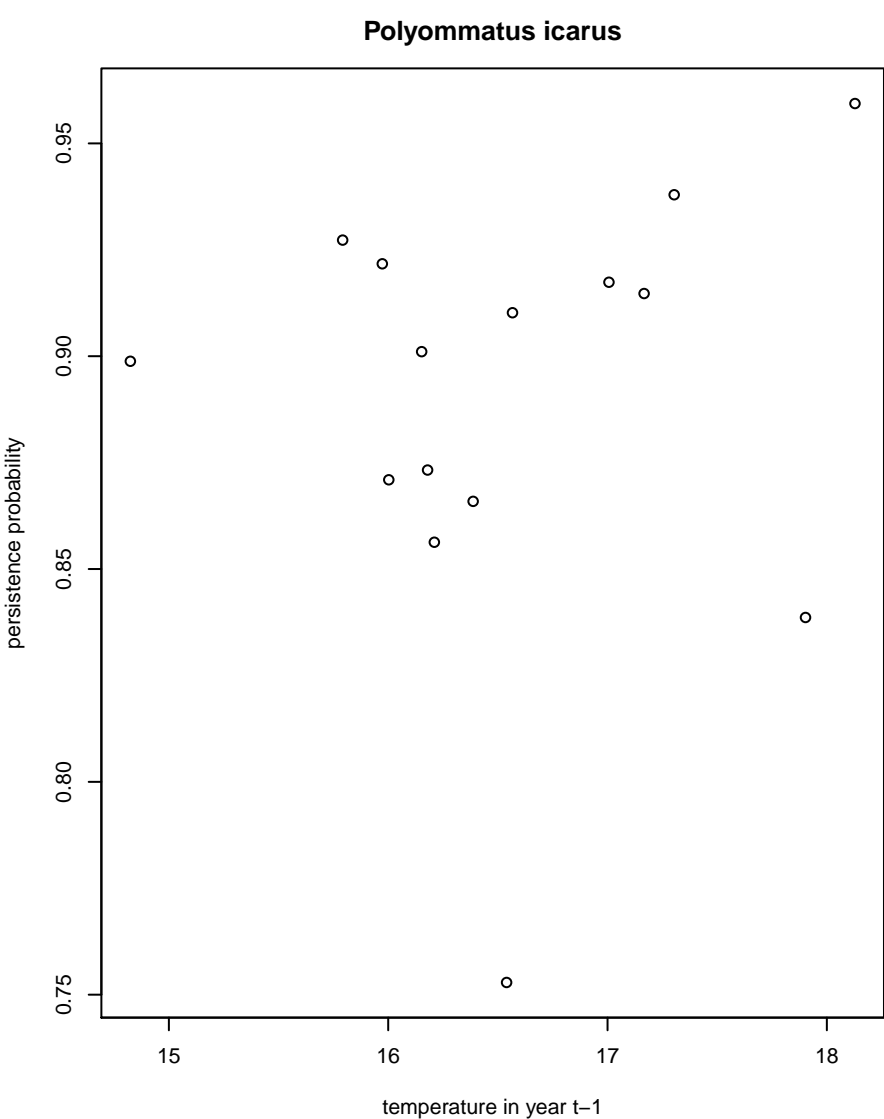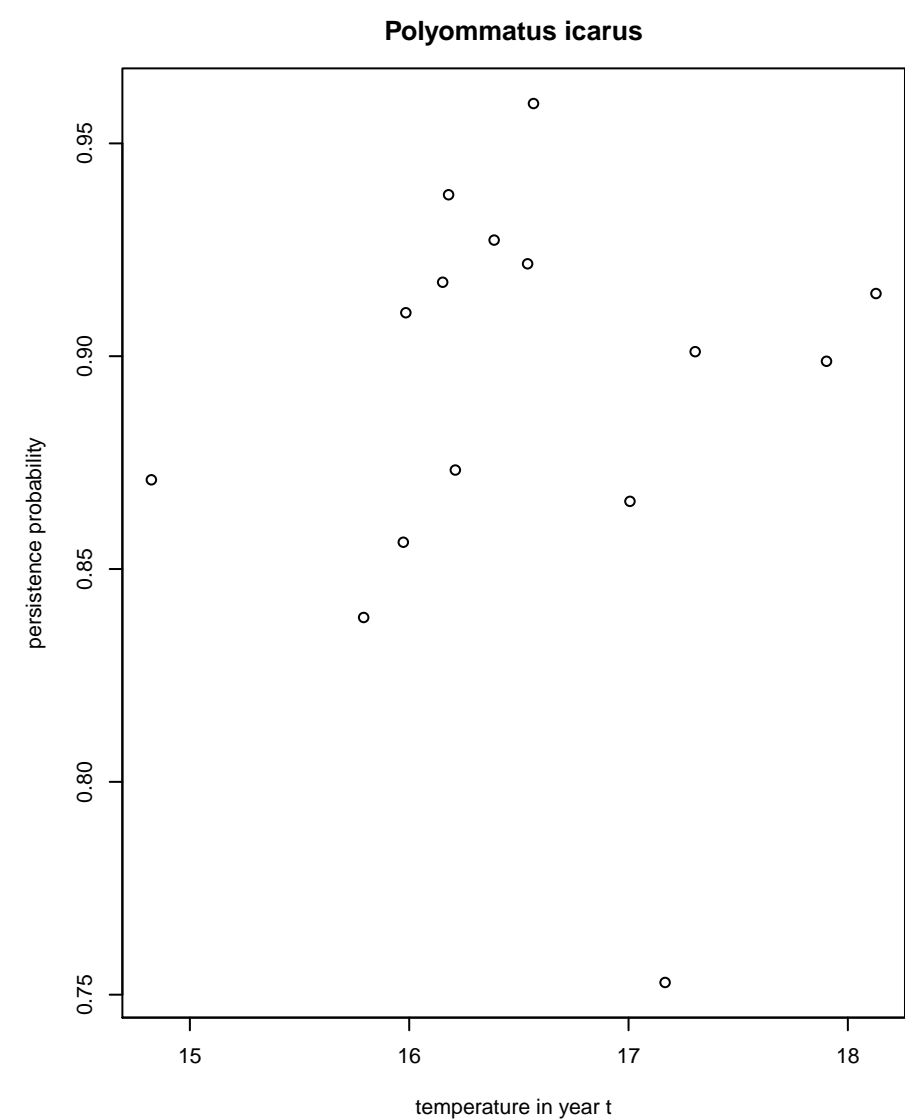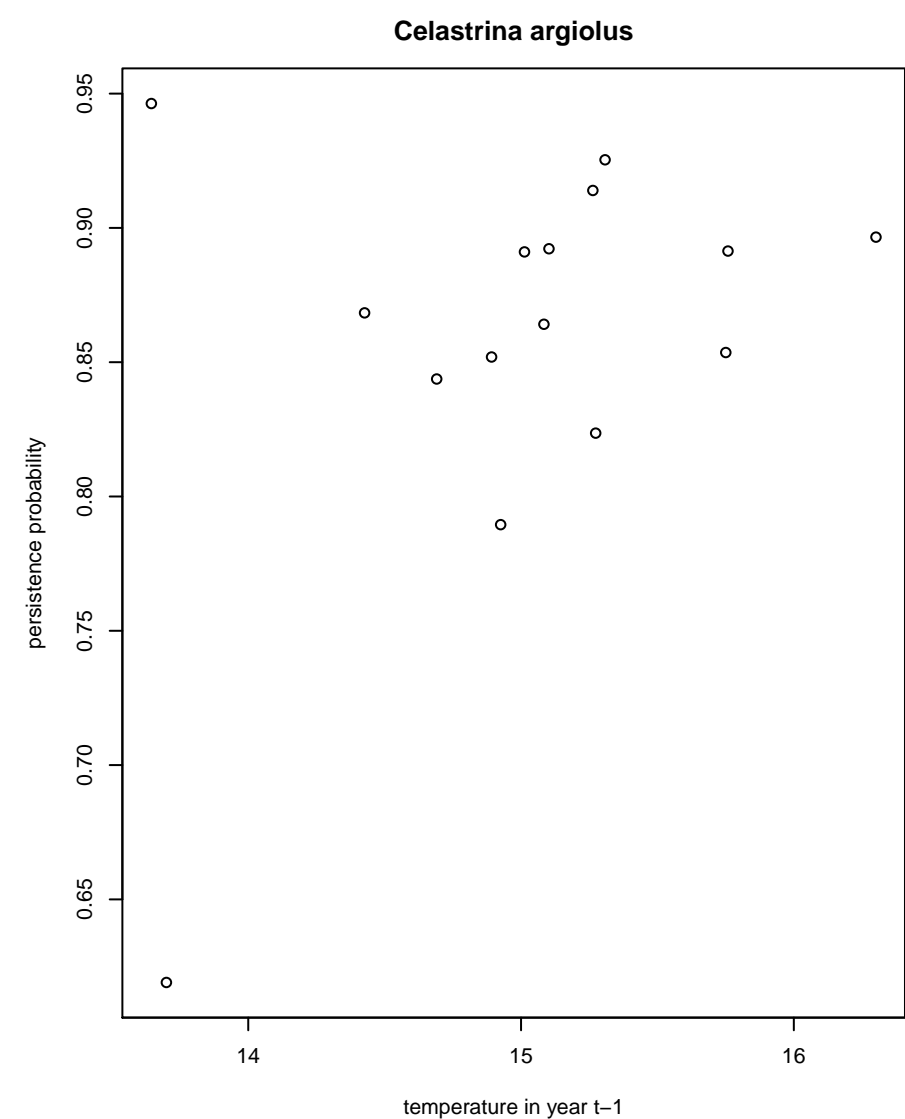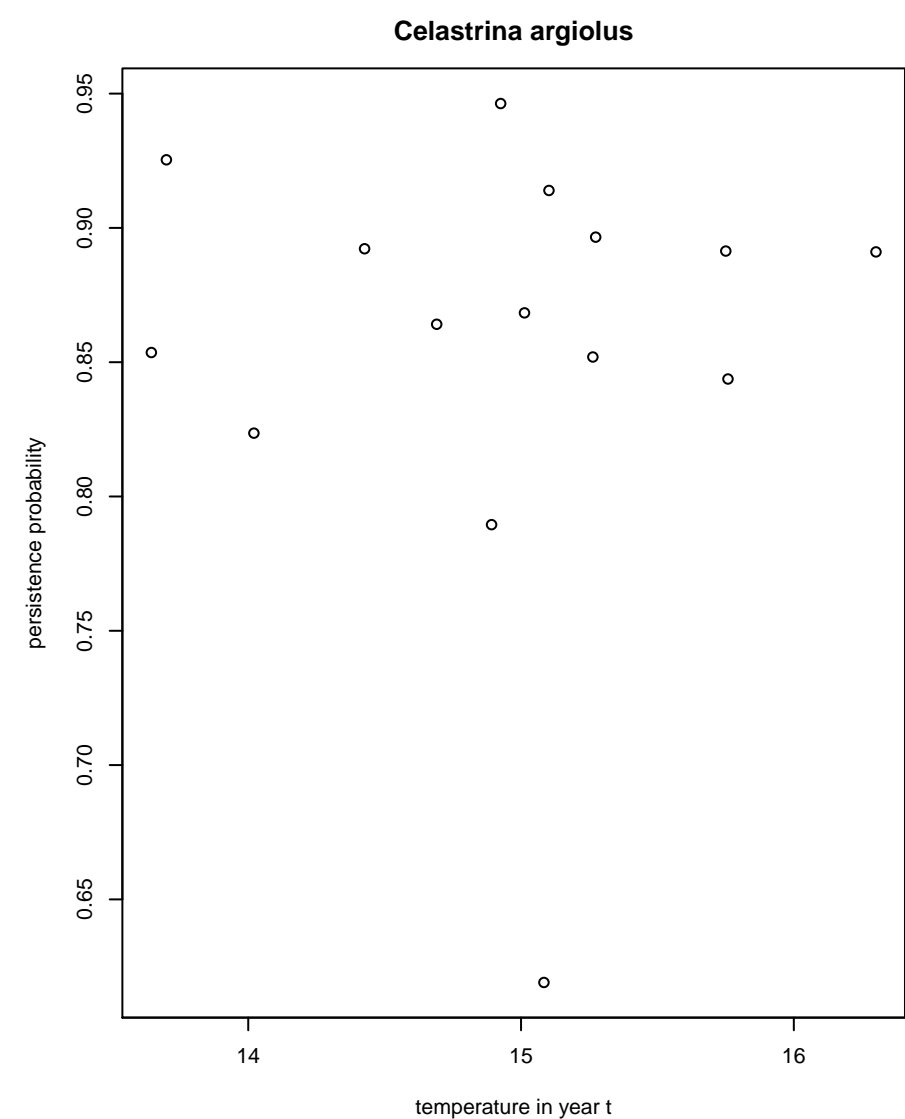

**Hesperia comma**

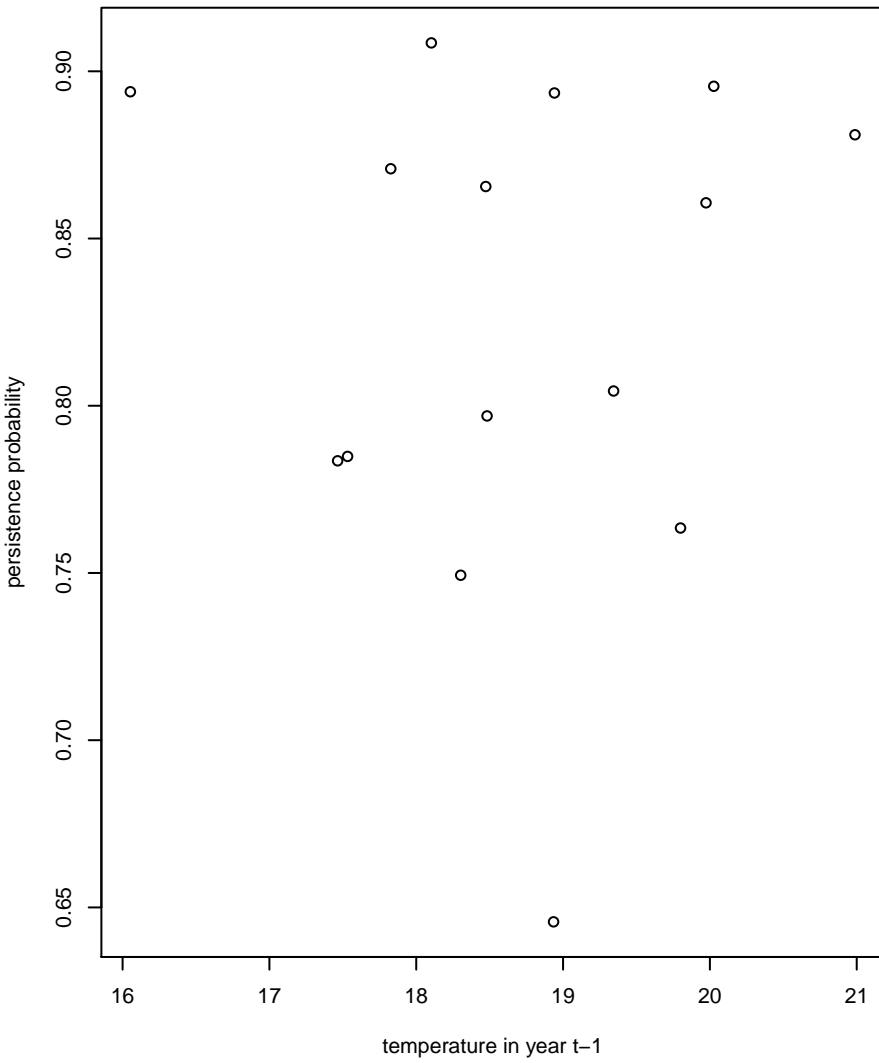

**Hesperia comma**

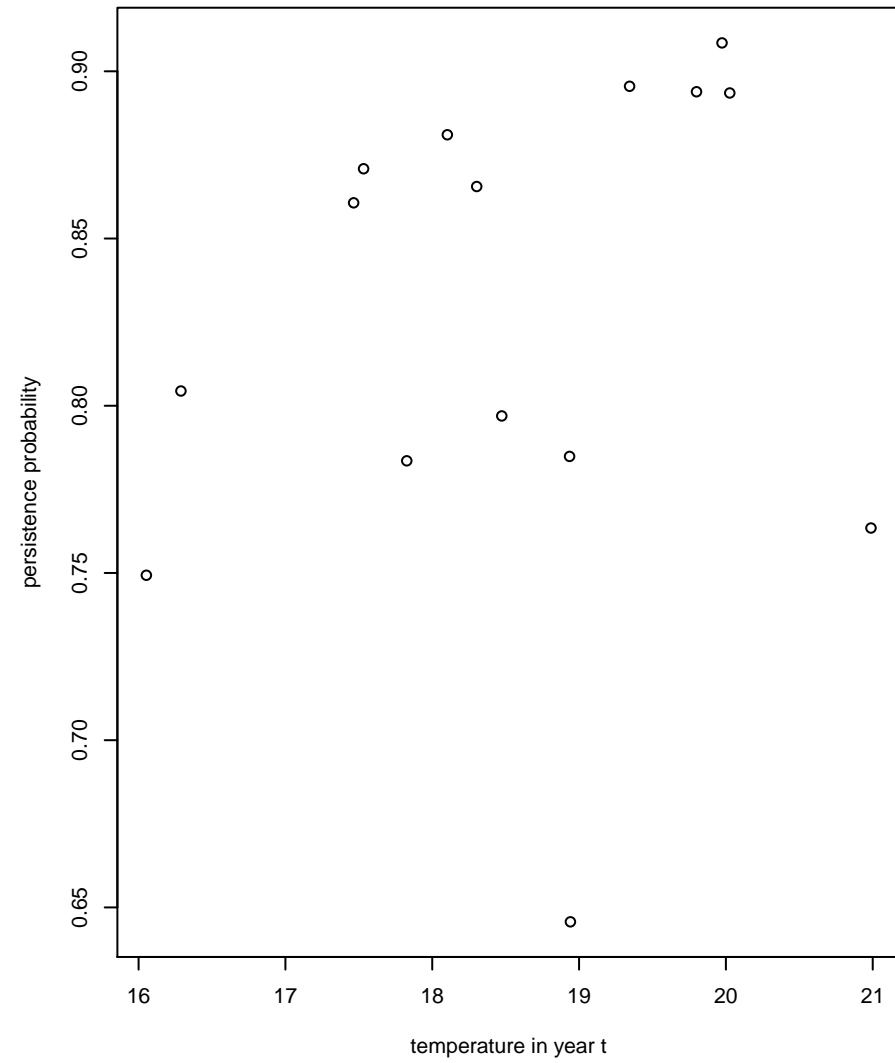

**Limenitis camilla**

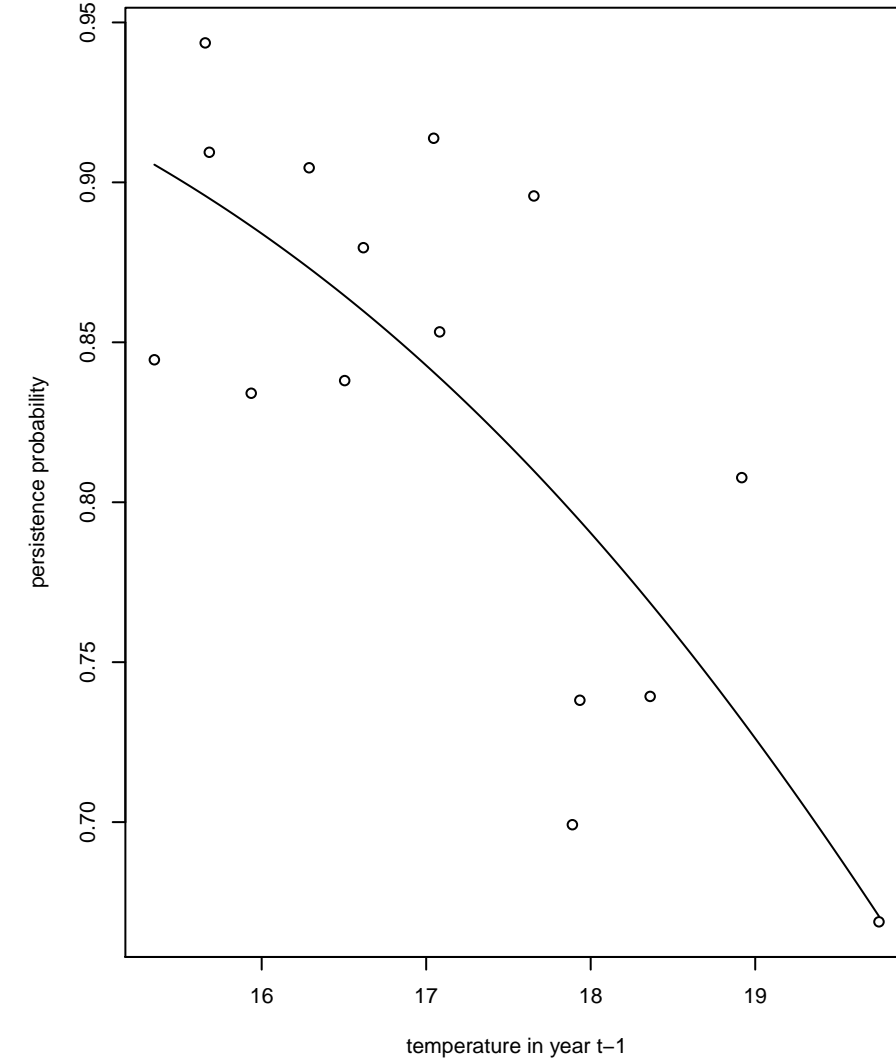

**Limenitis camilla**

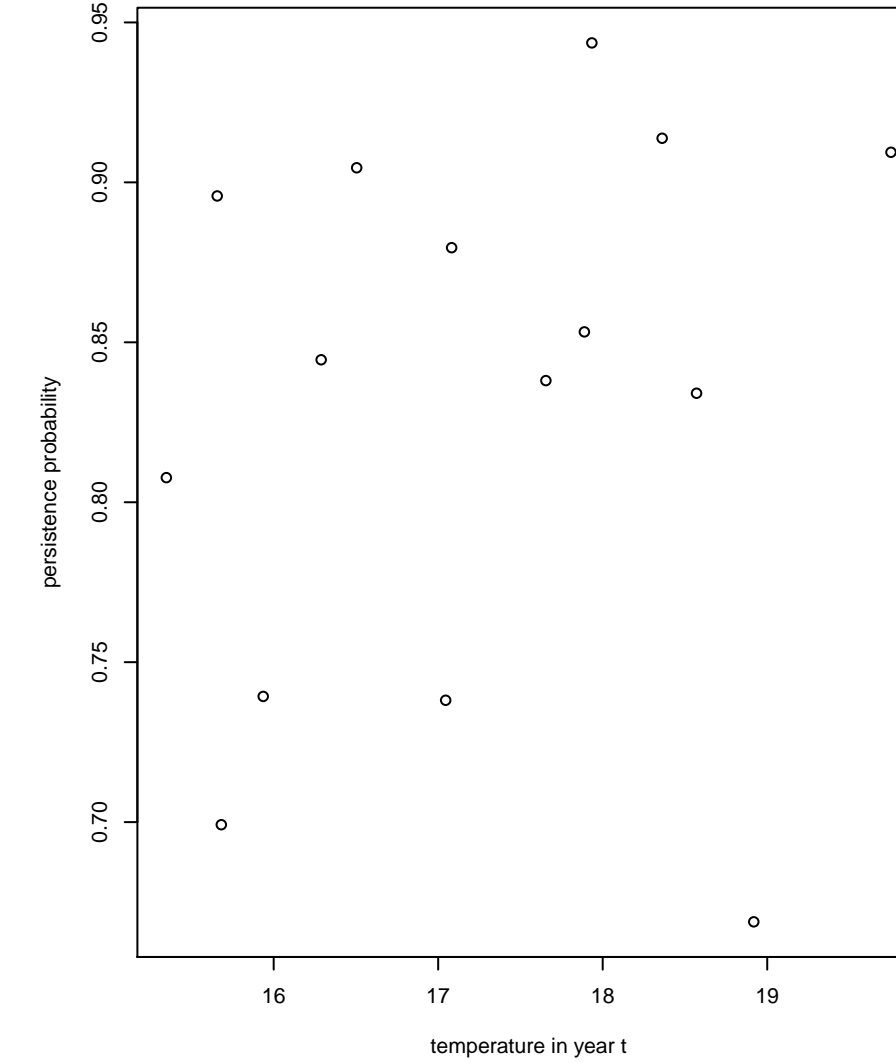

**Ochlodes sylvanus**

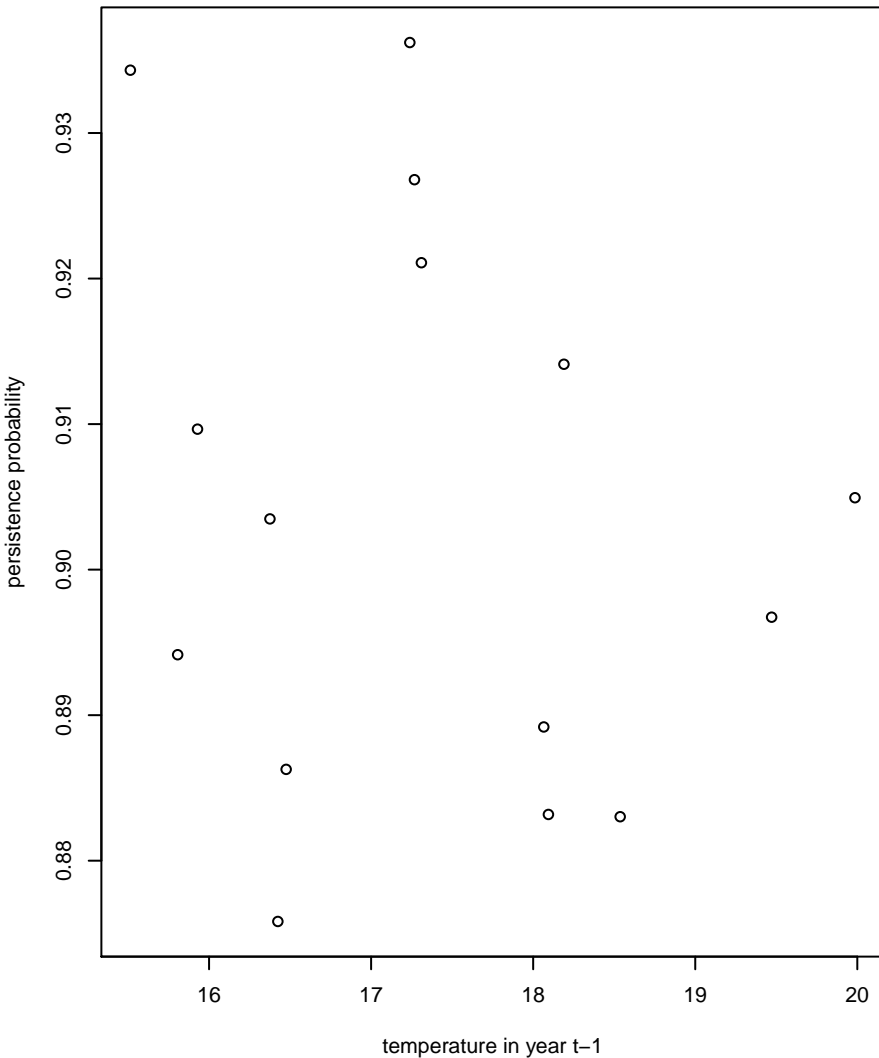

**Ochlodes sylvanus**

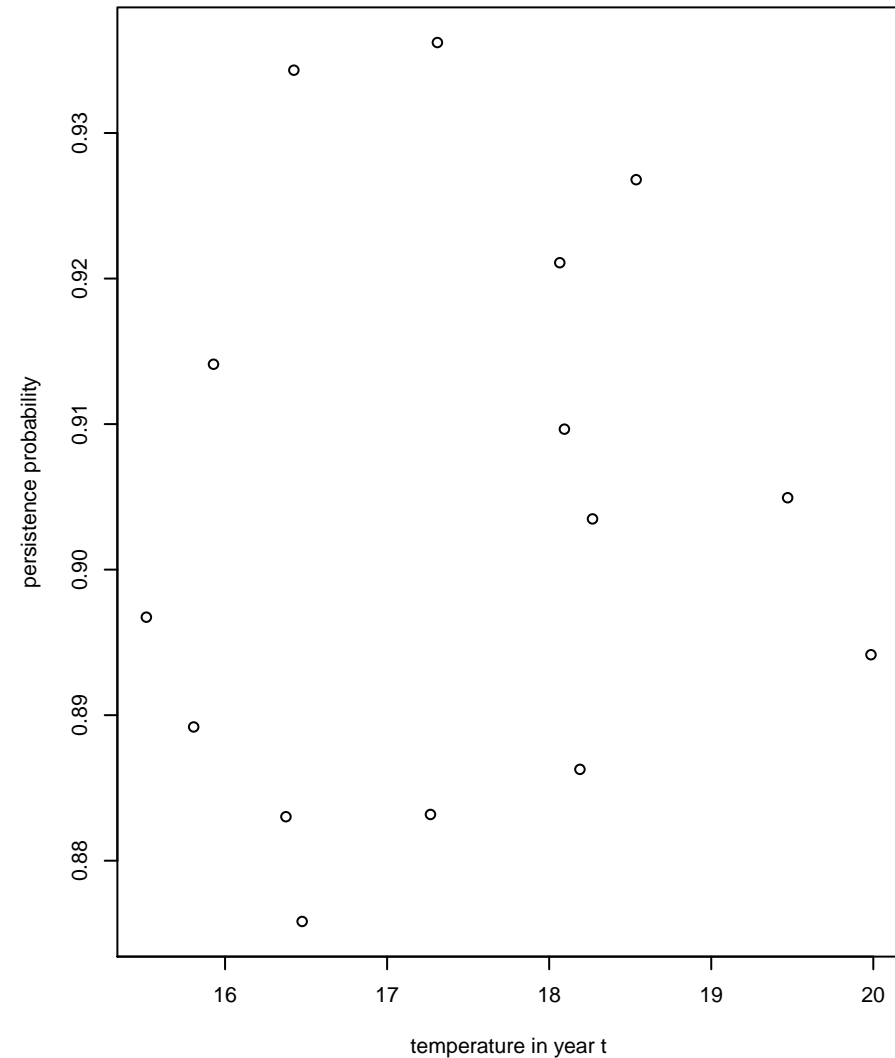

**Aglais urticae**

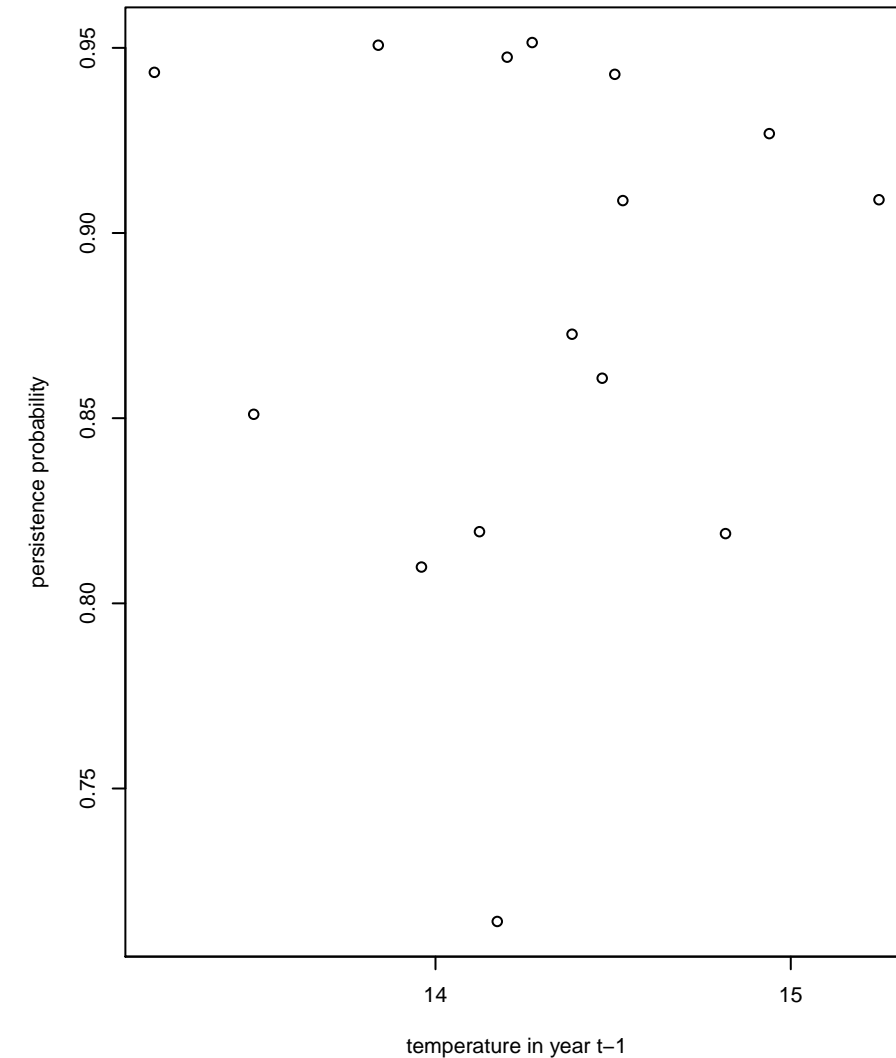

**Aglais urticae**

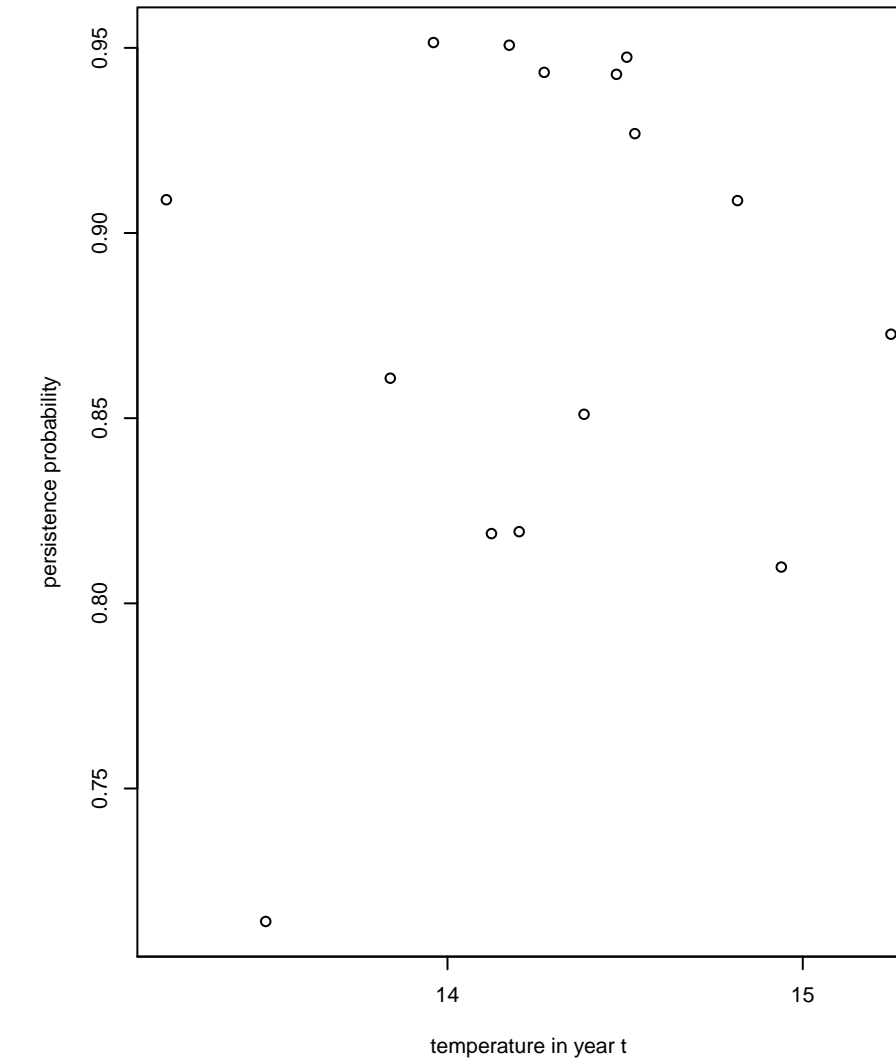



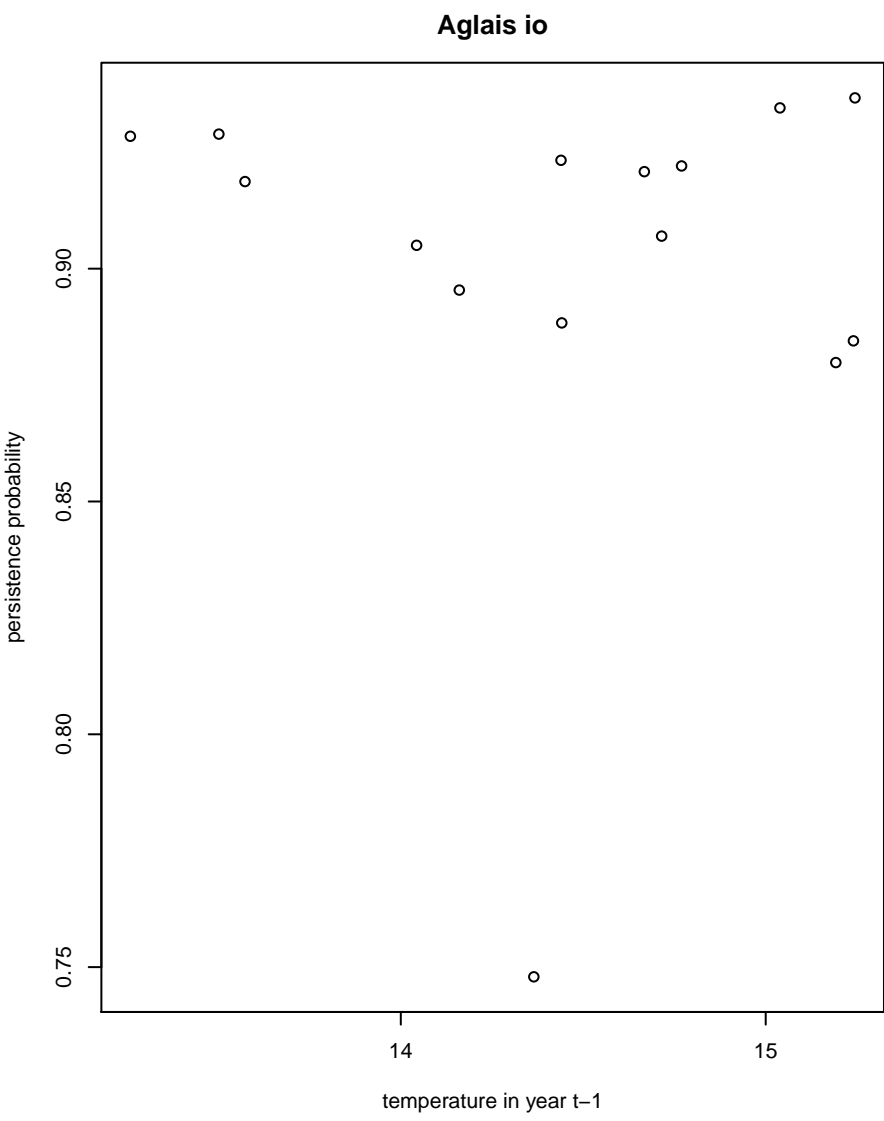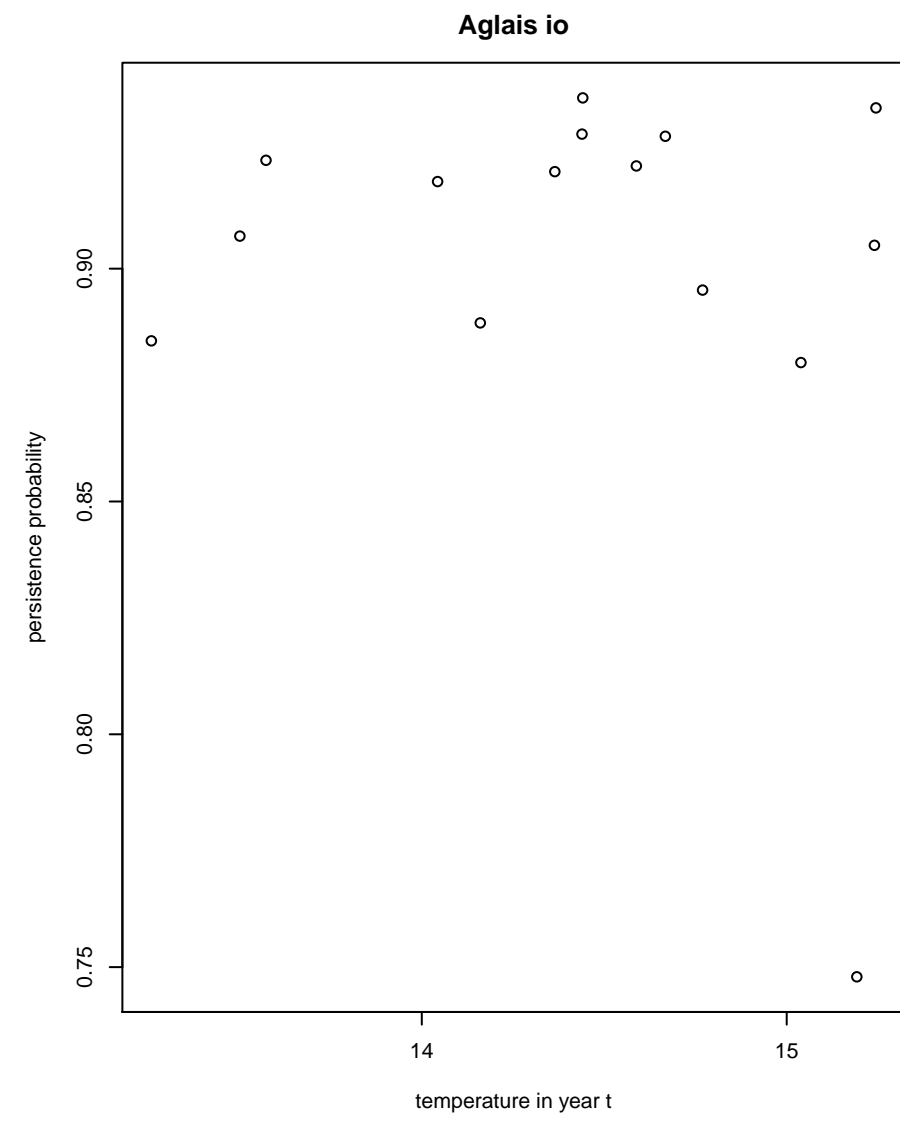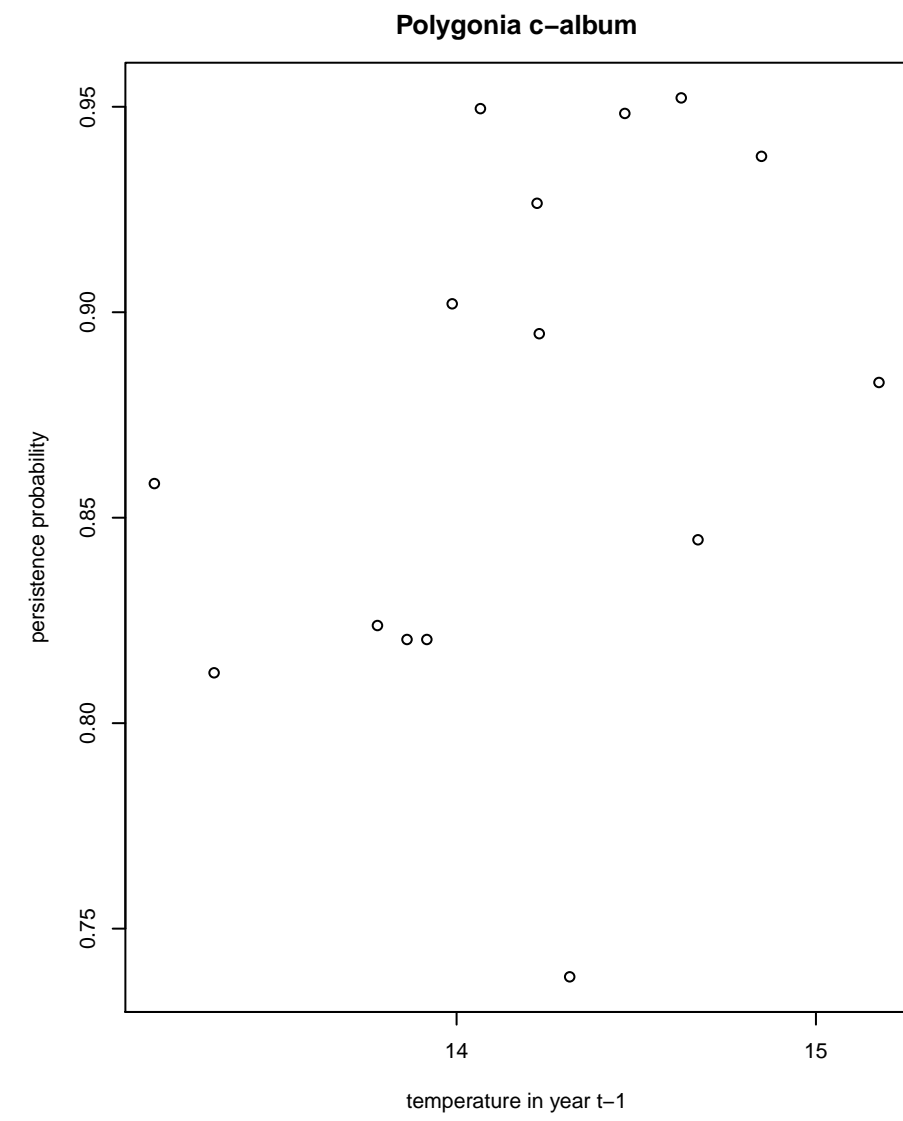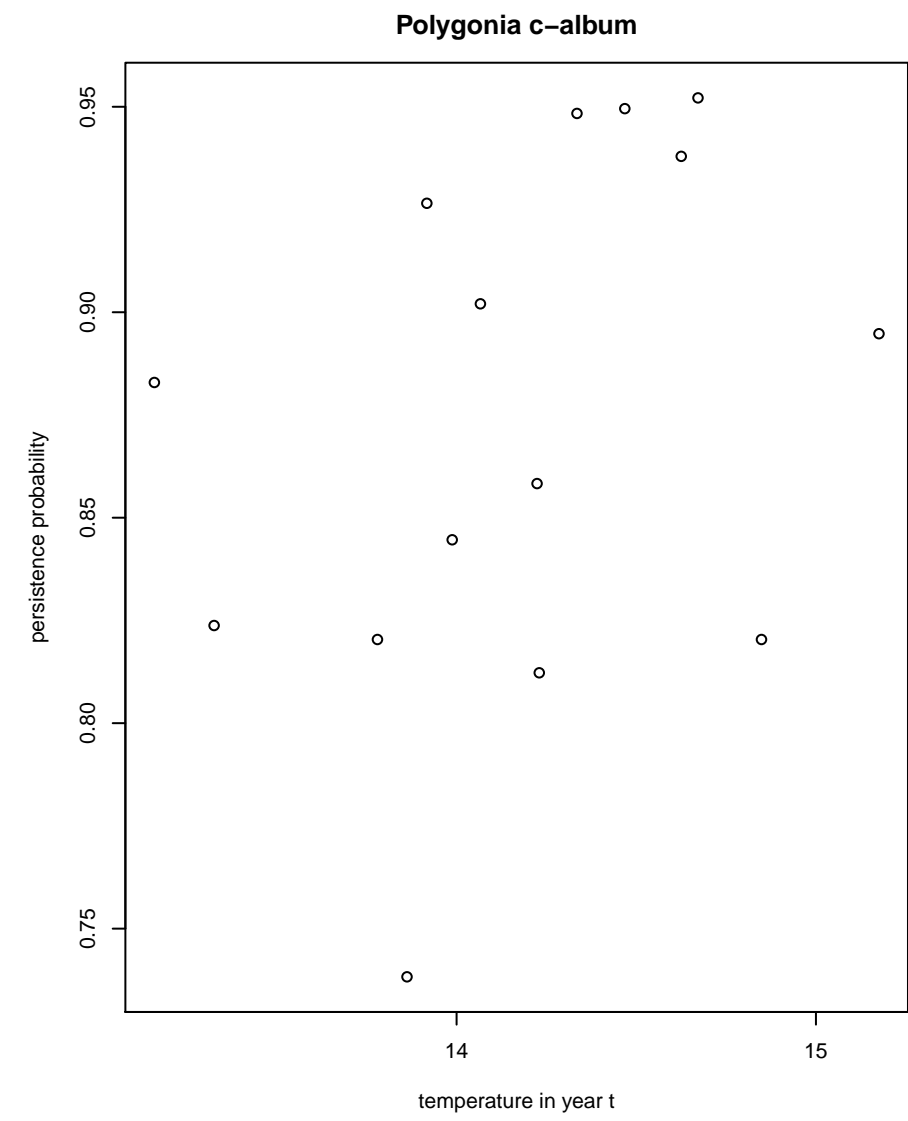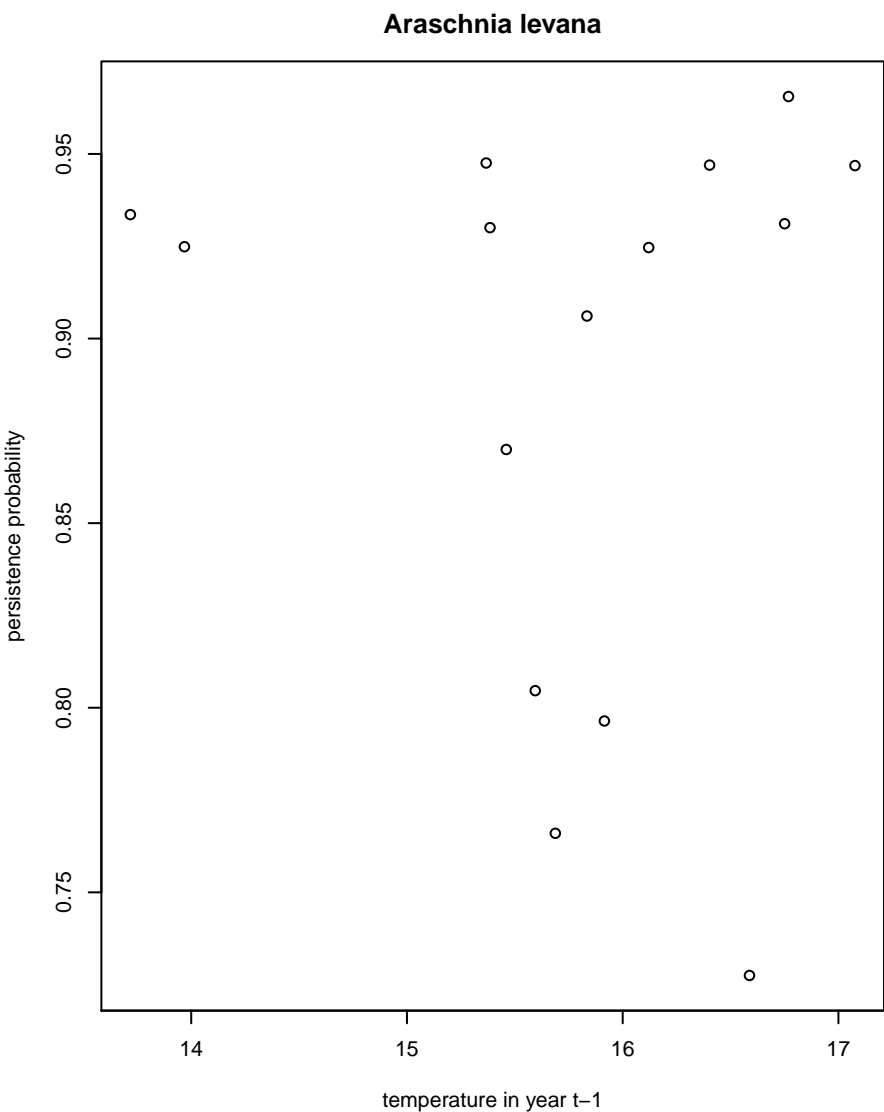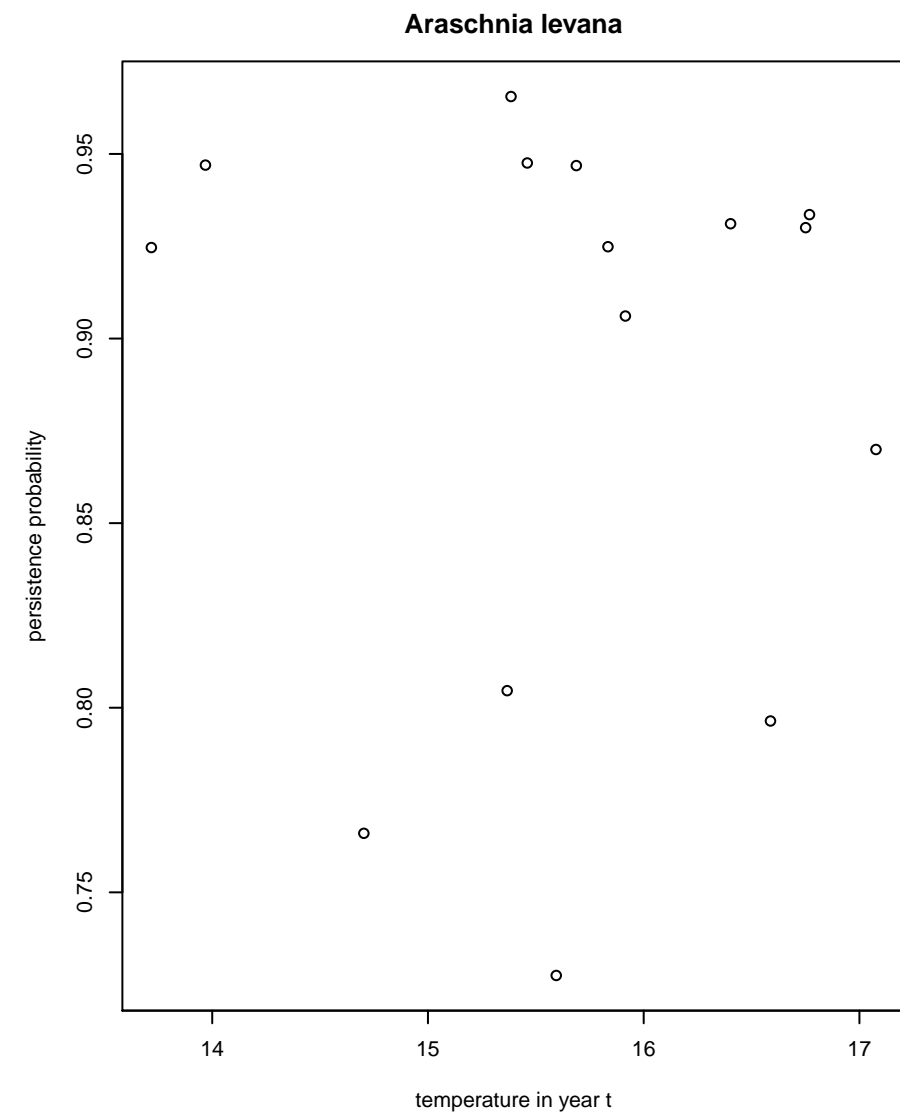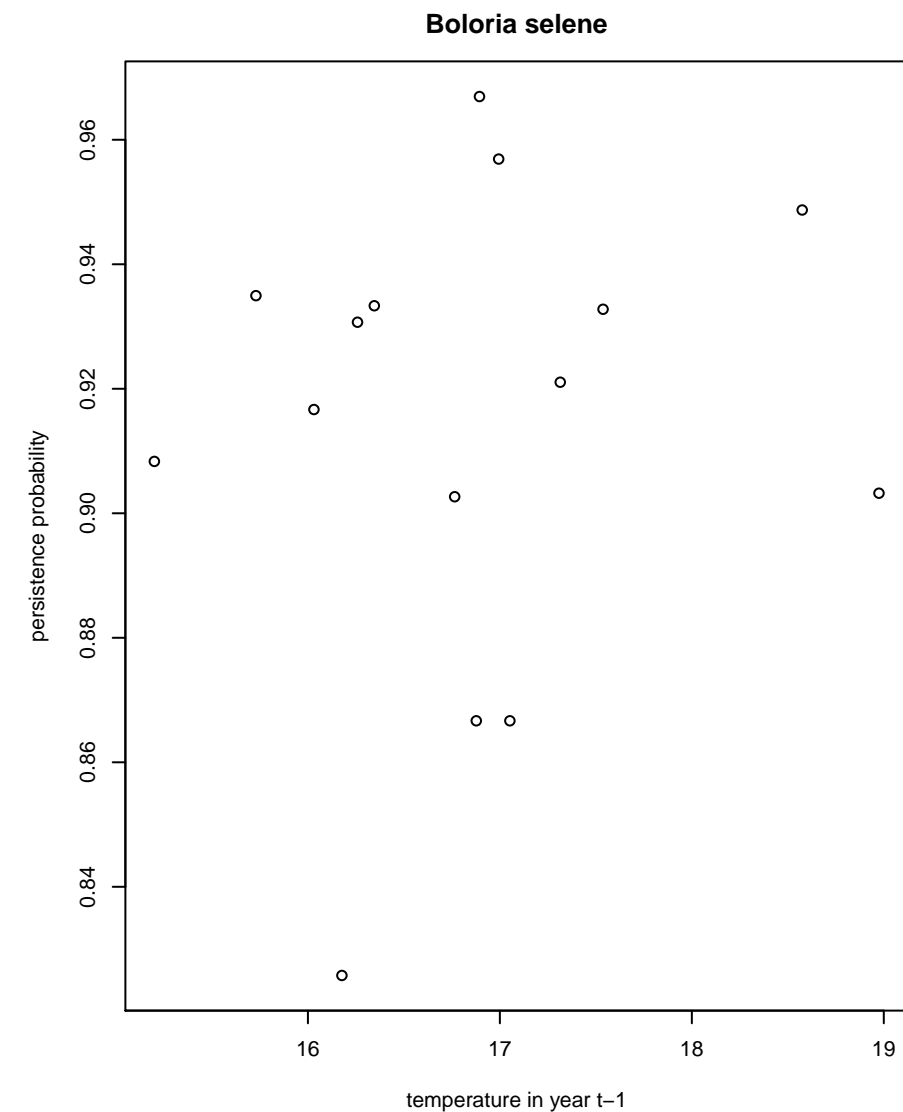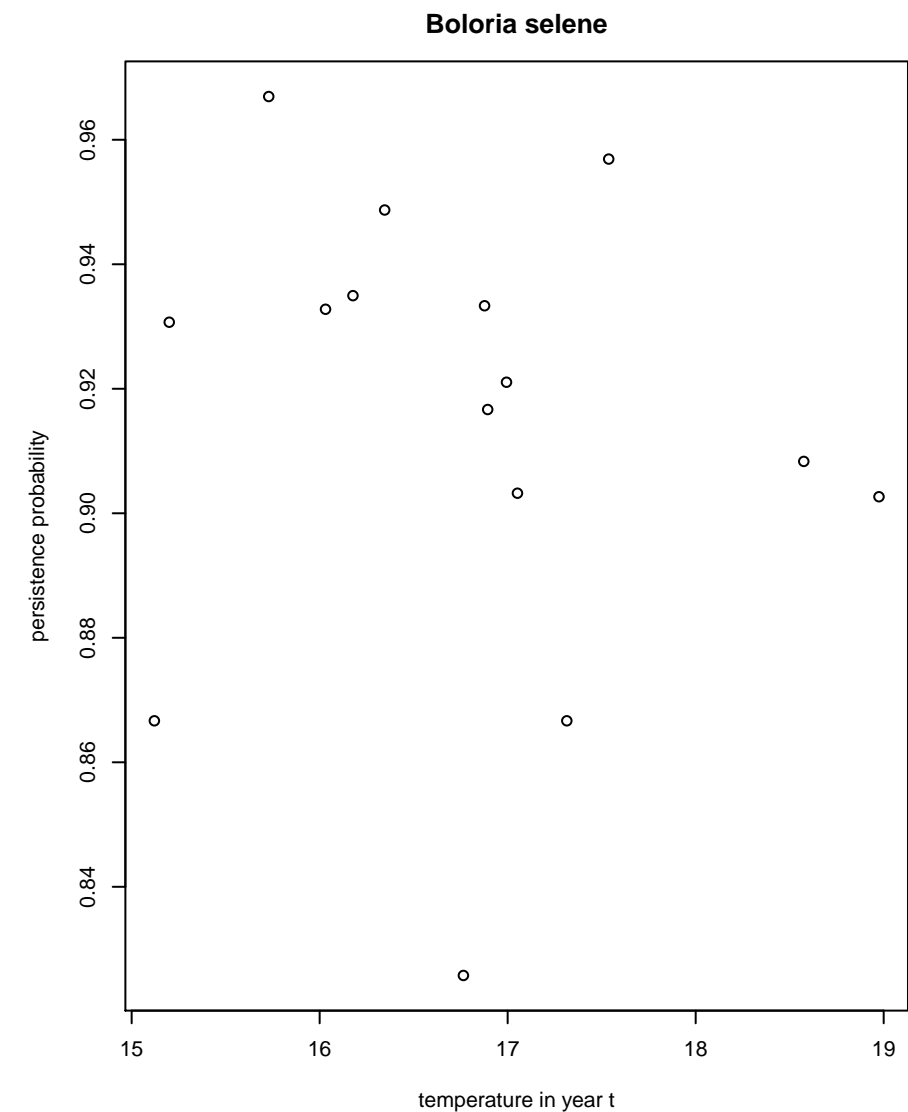

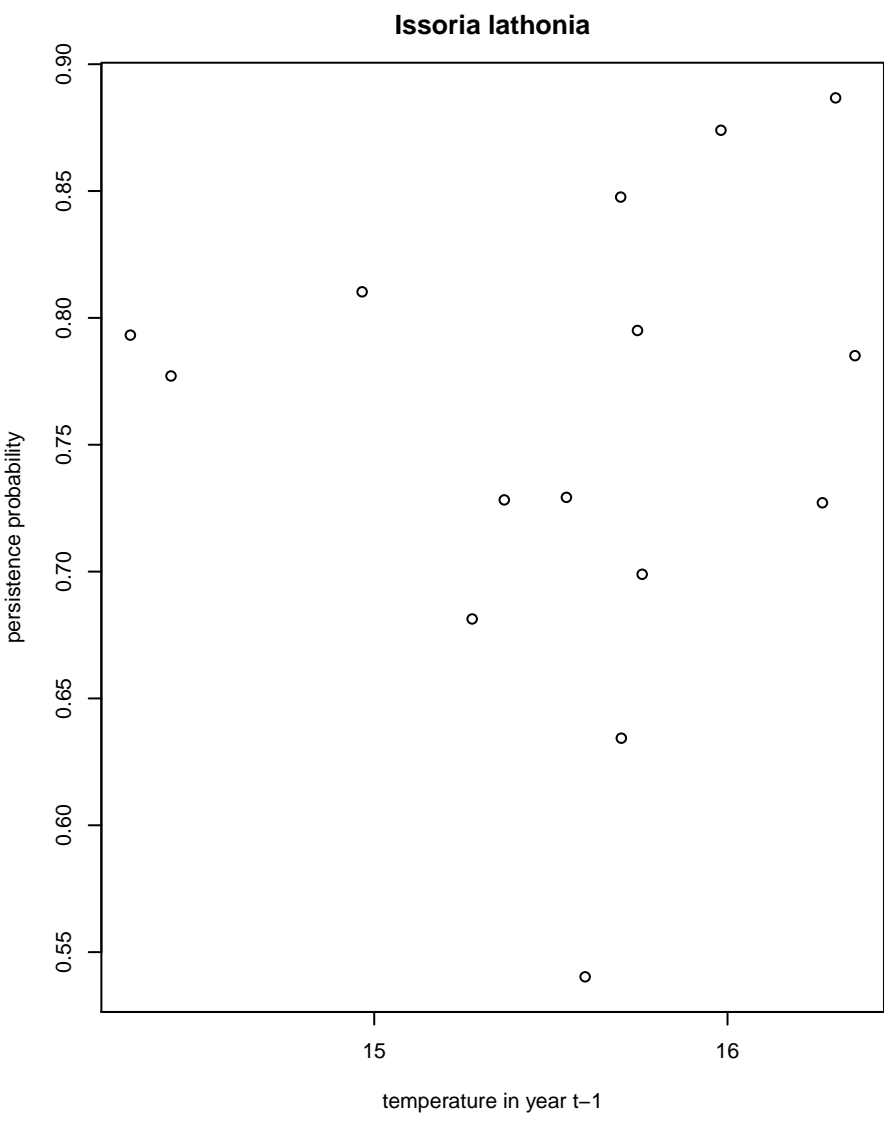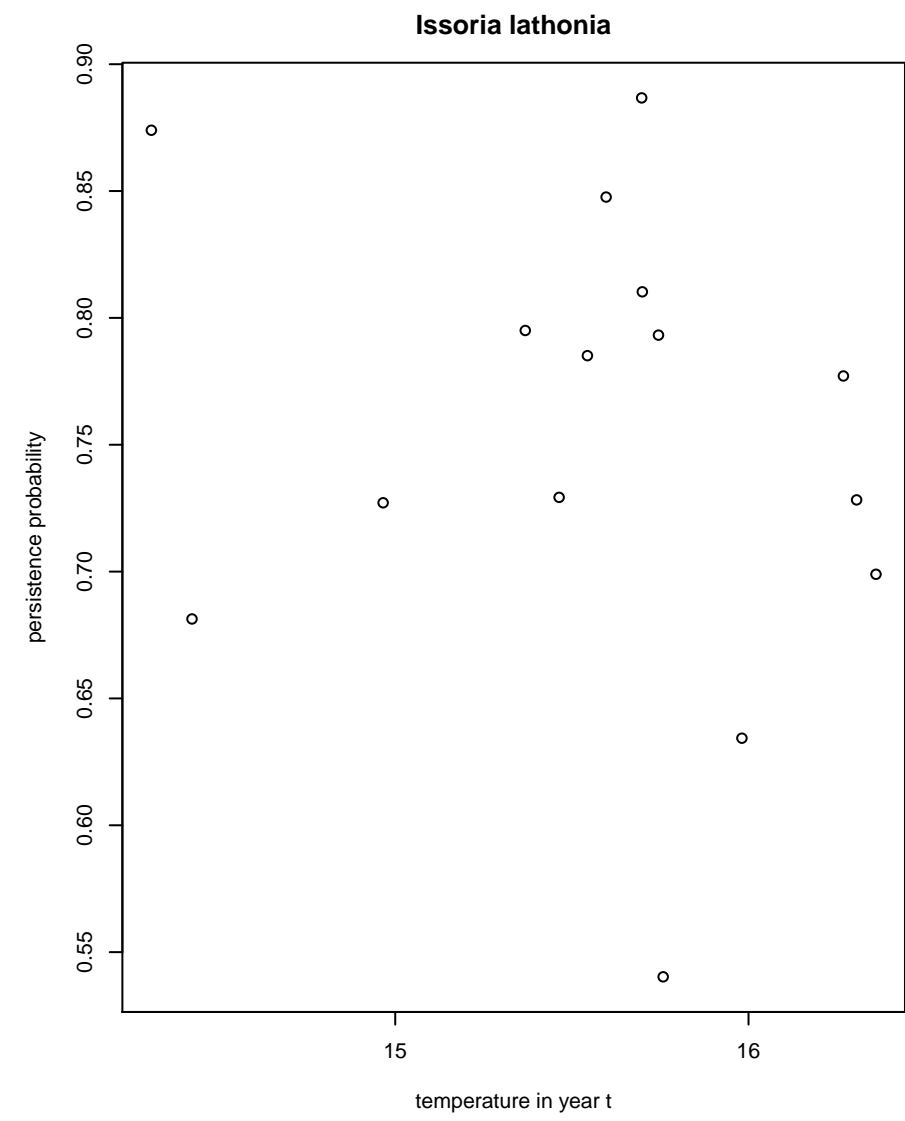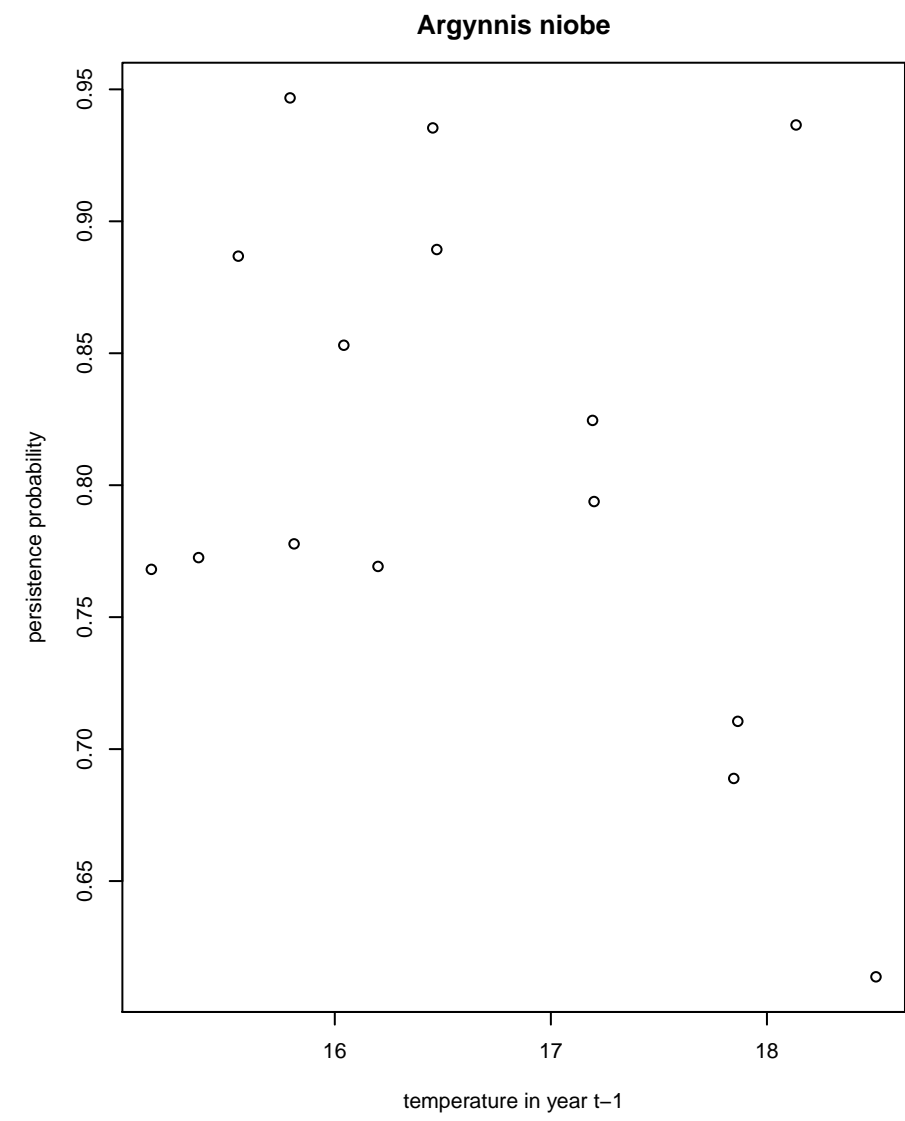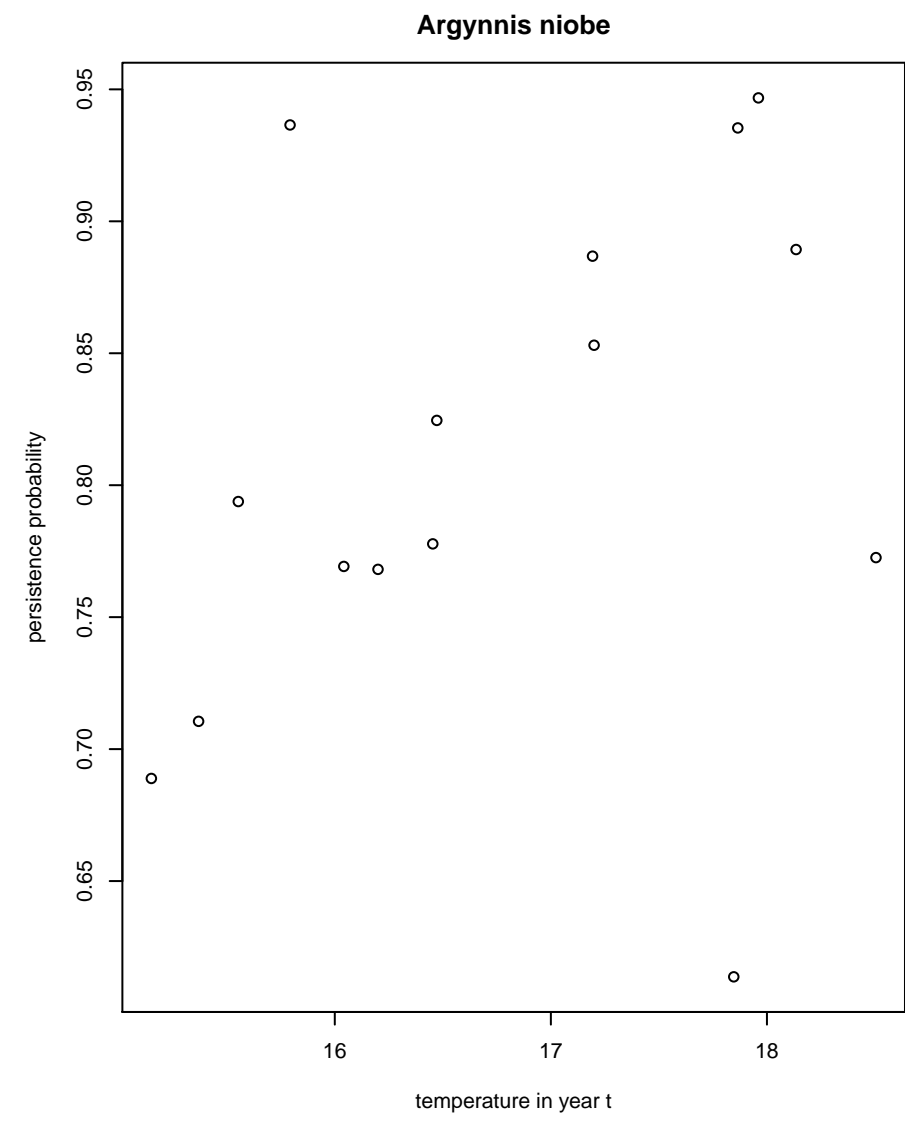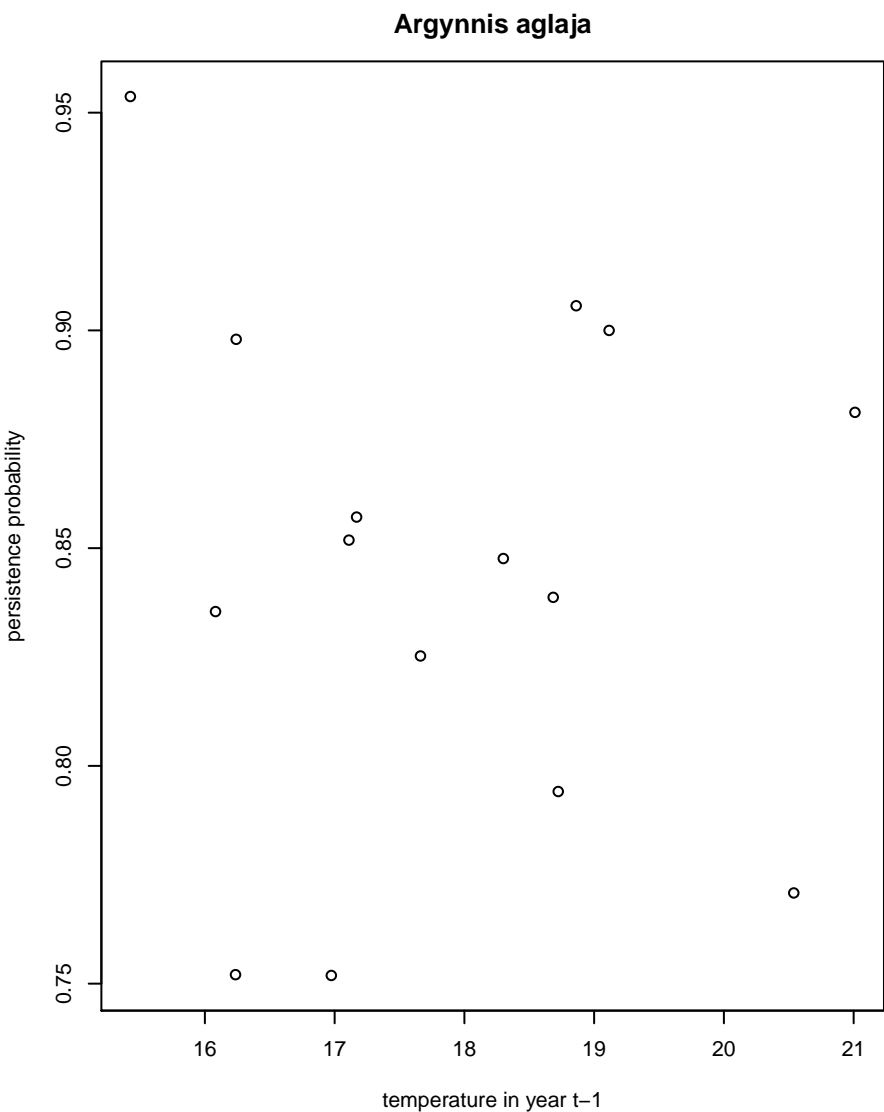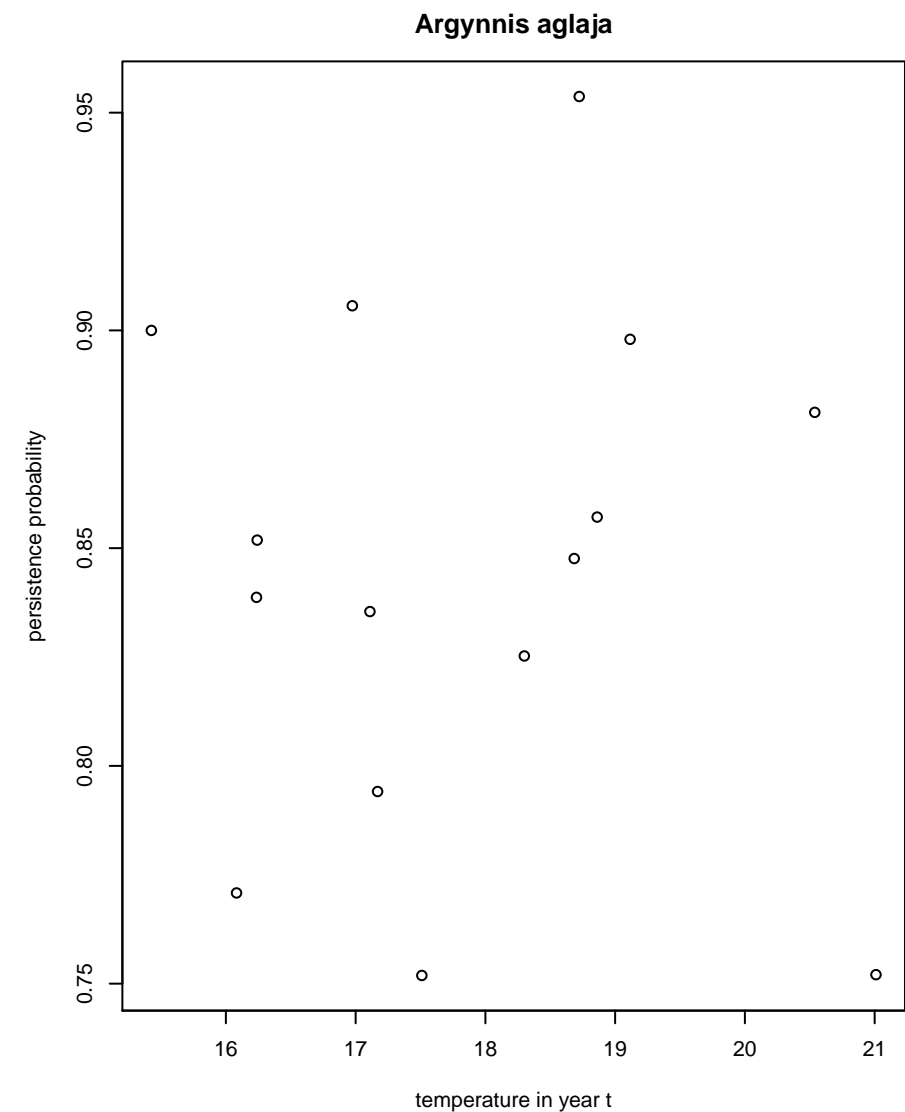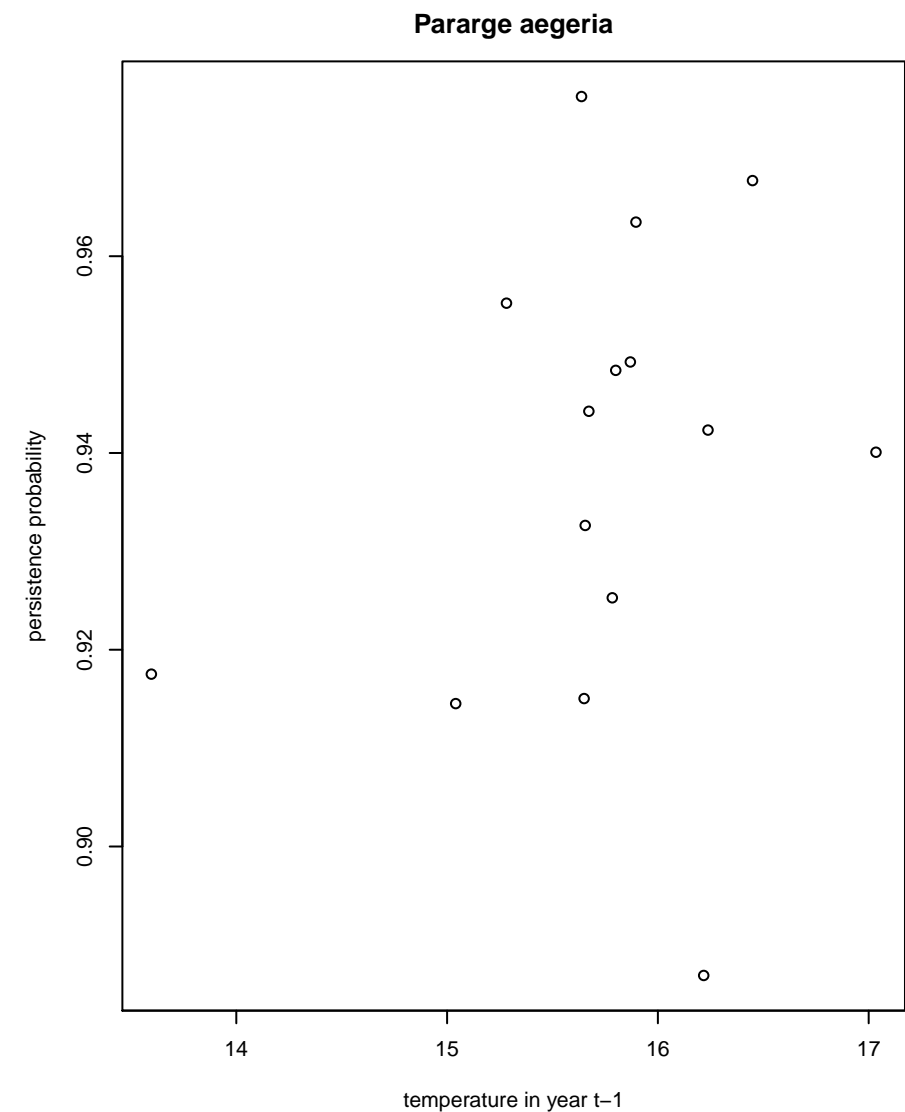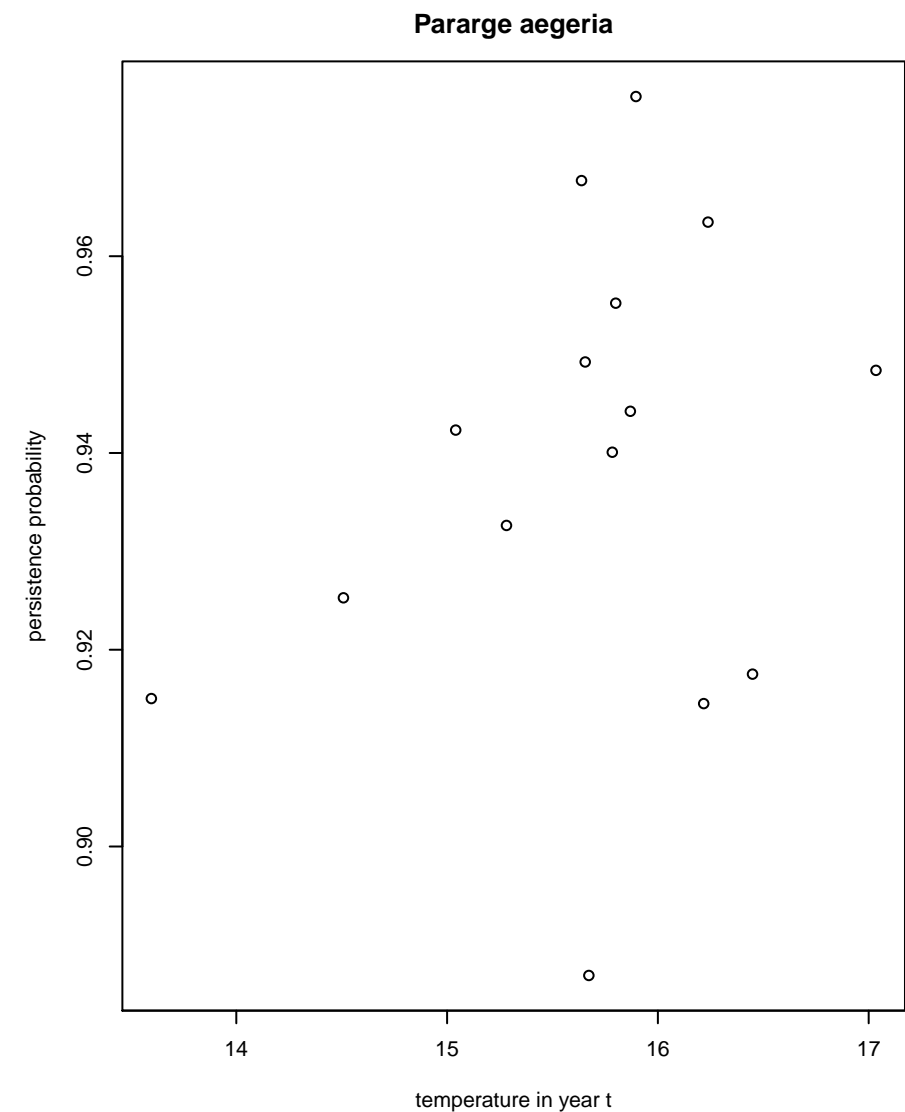

**Lasiommata megera**

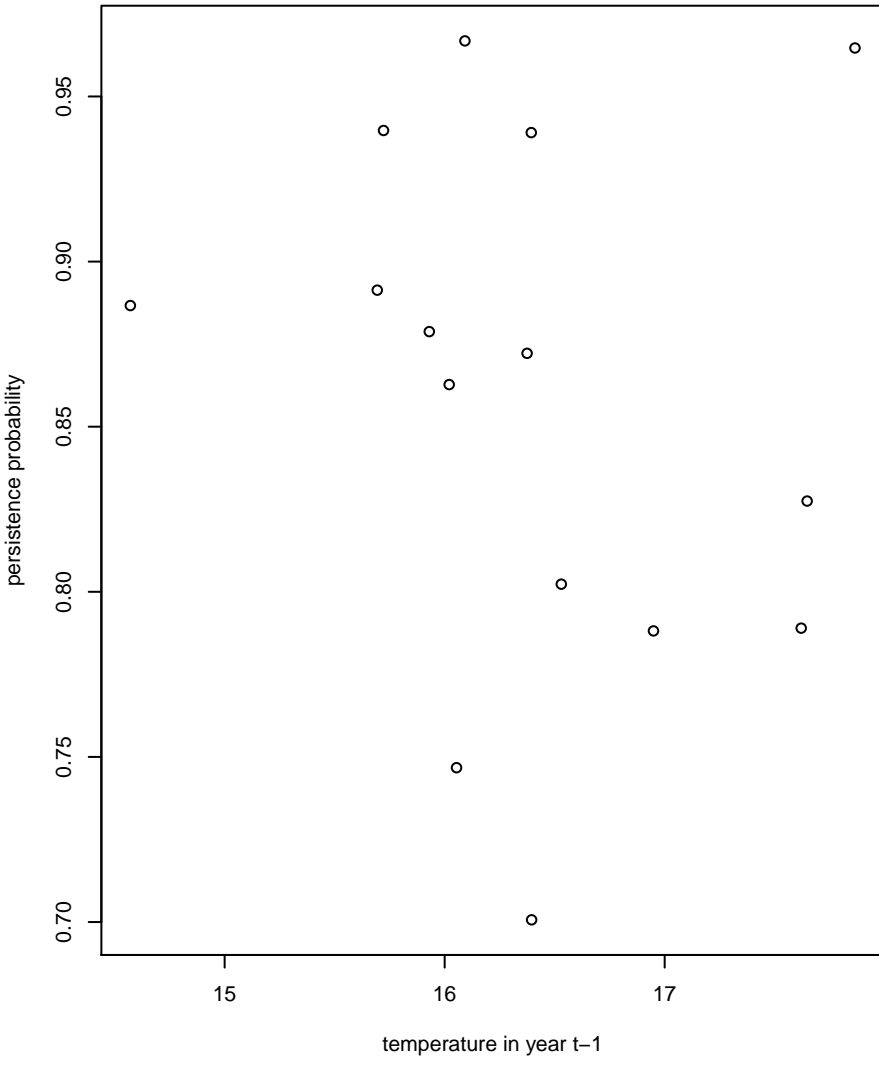

**Lasiommata megera**

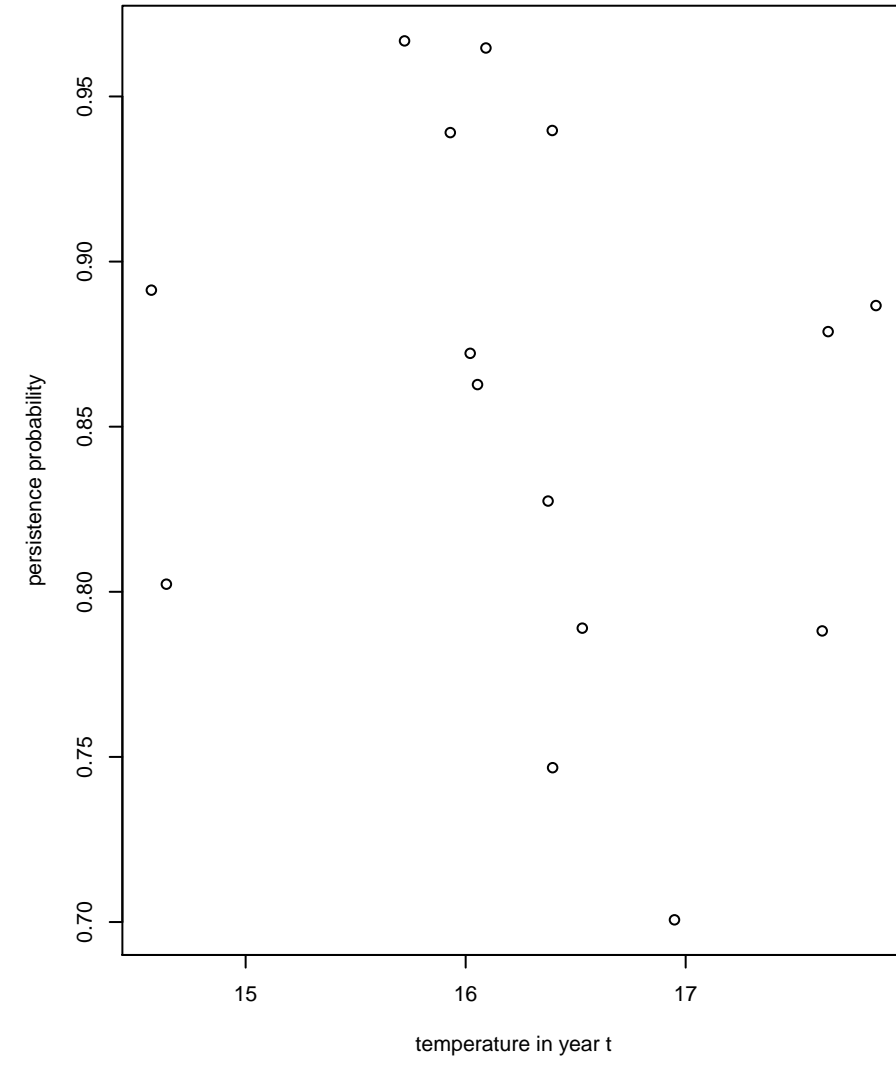

**Aphantopus hyperantus**

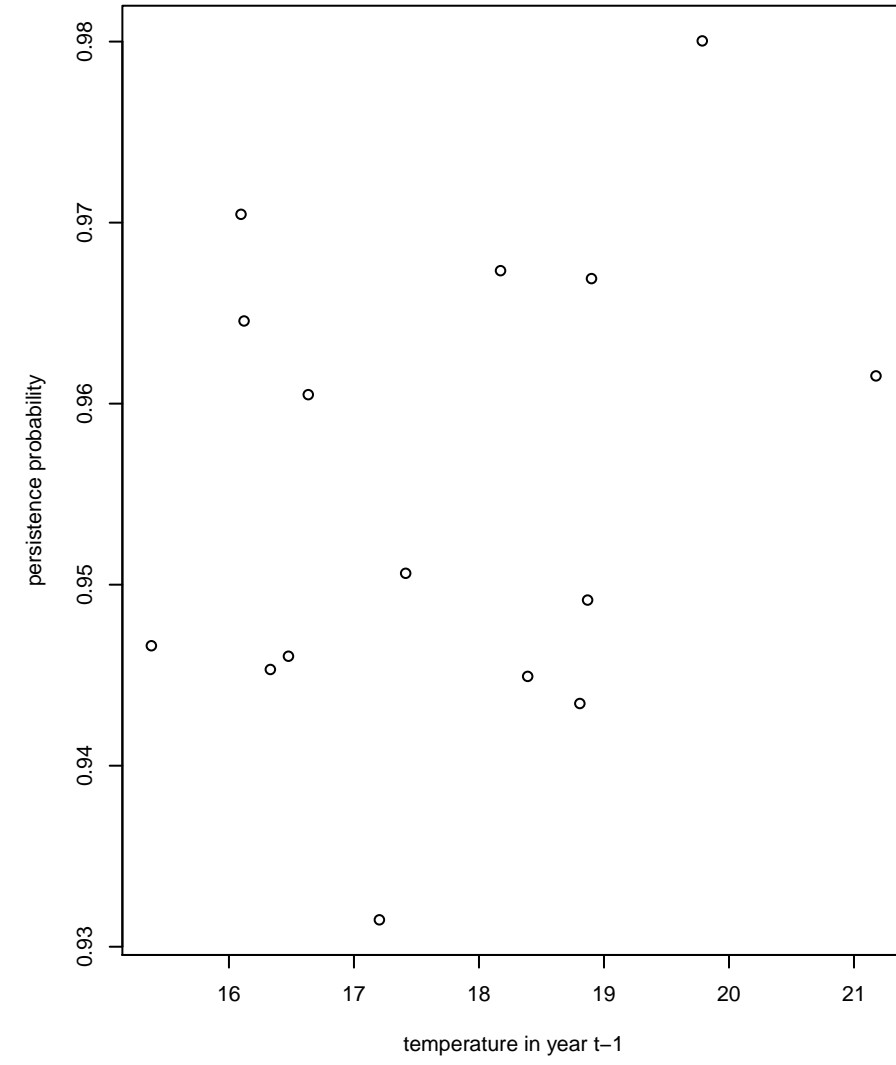

**Aphantopus hyperantus**

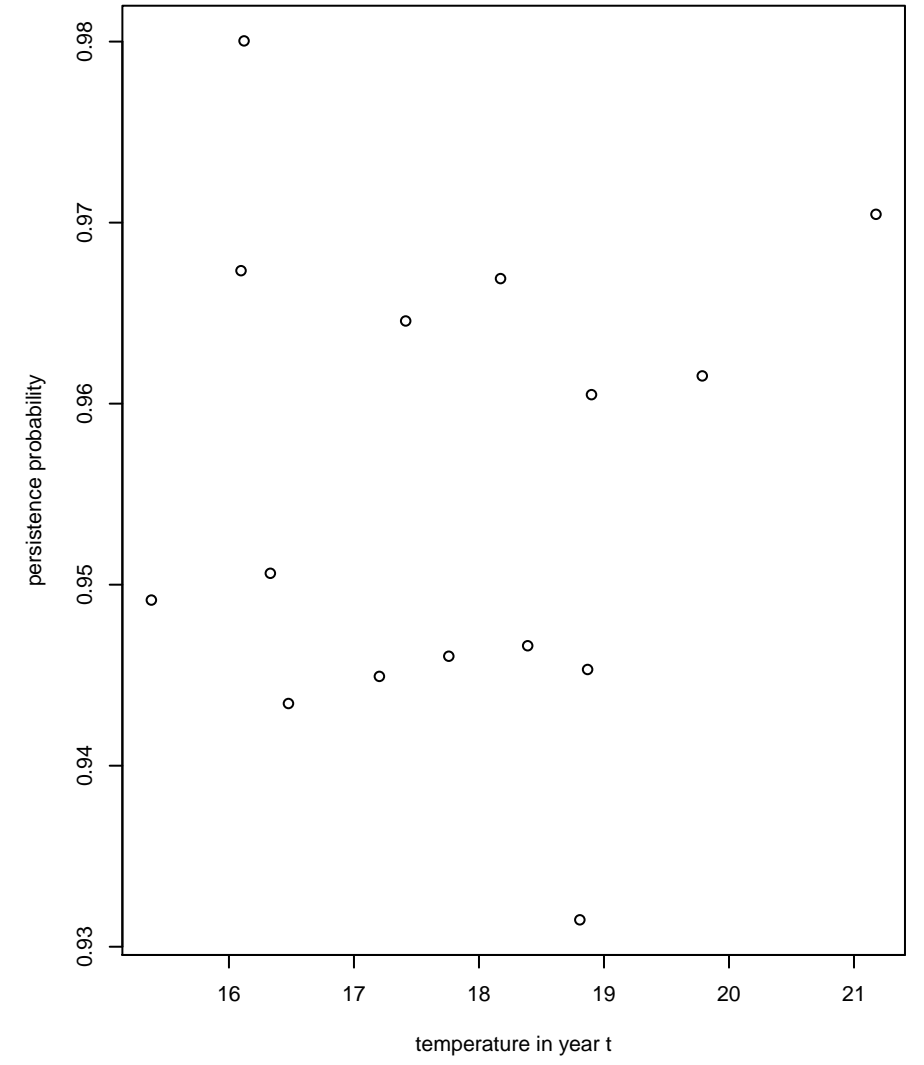

**Coenonympha pamphilus**

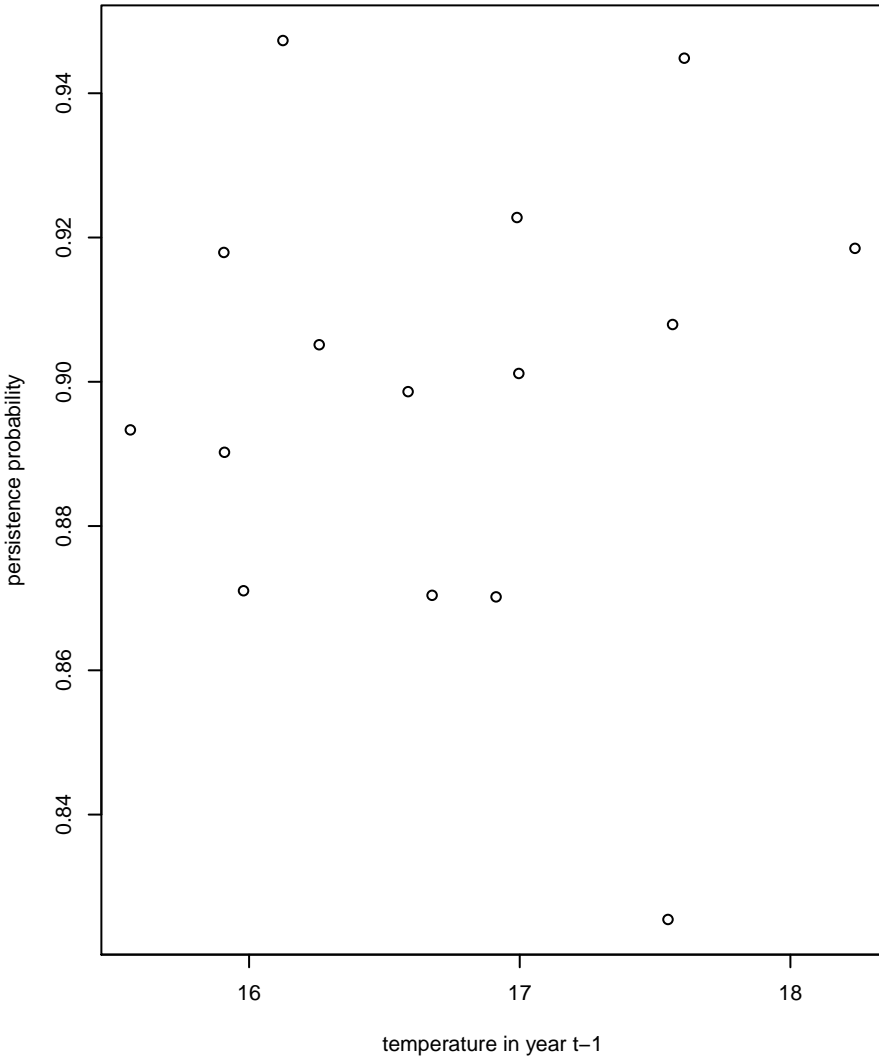

**Coenonympha pamphilus**

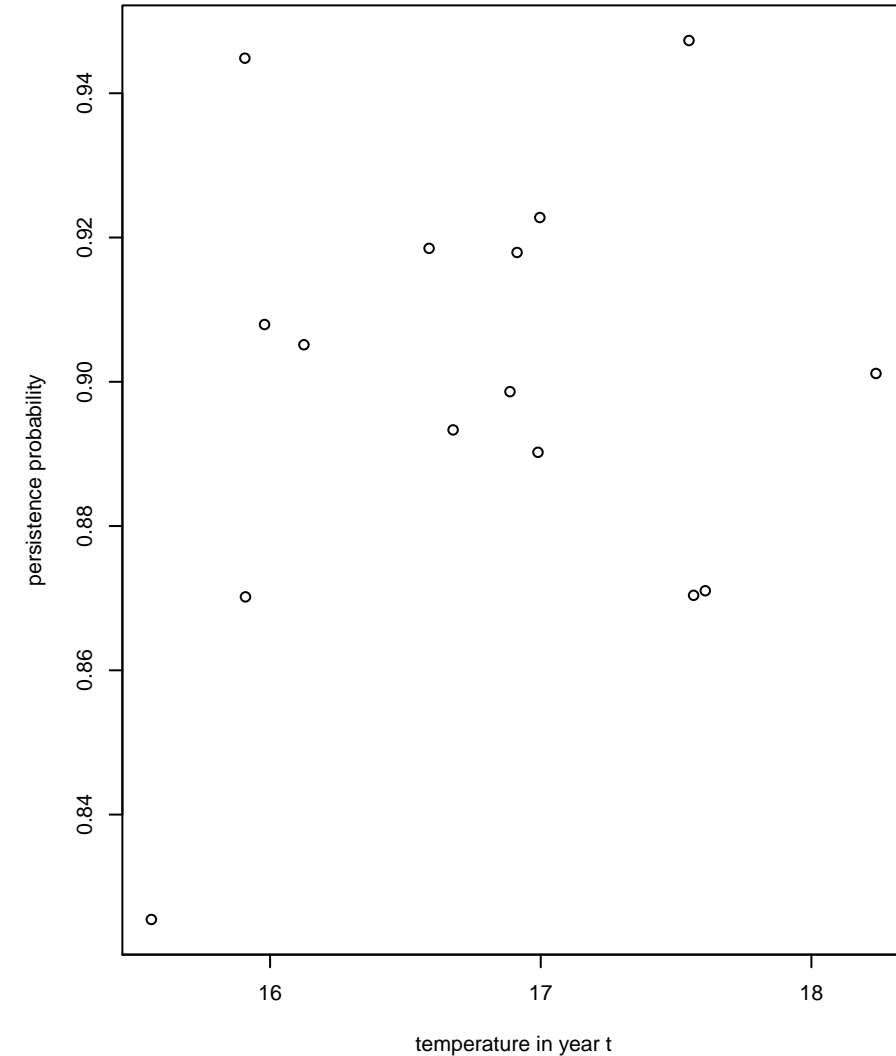

**Anguis fragilis**

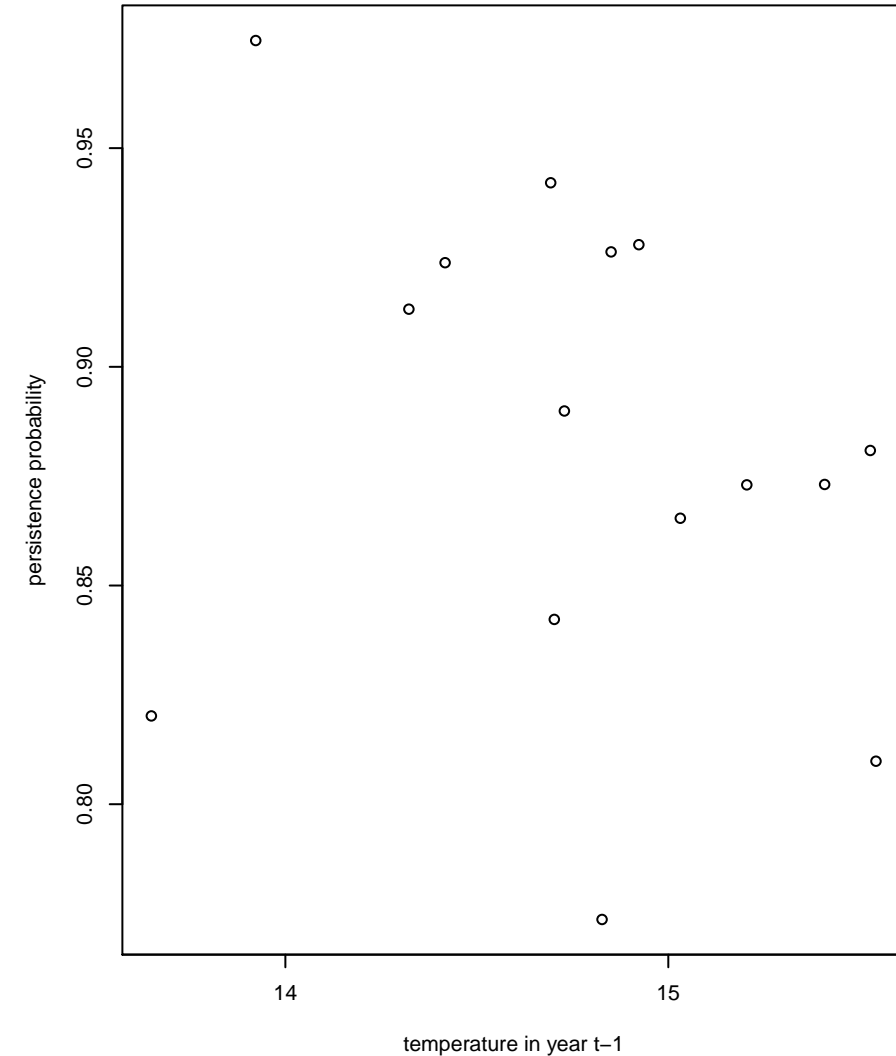

**Anguis fragilis**

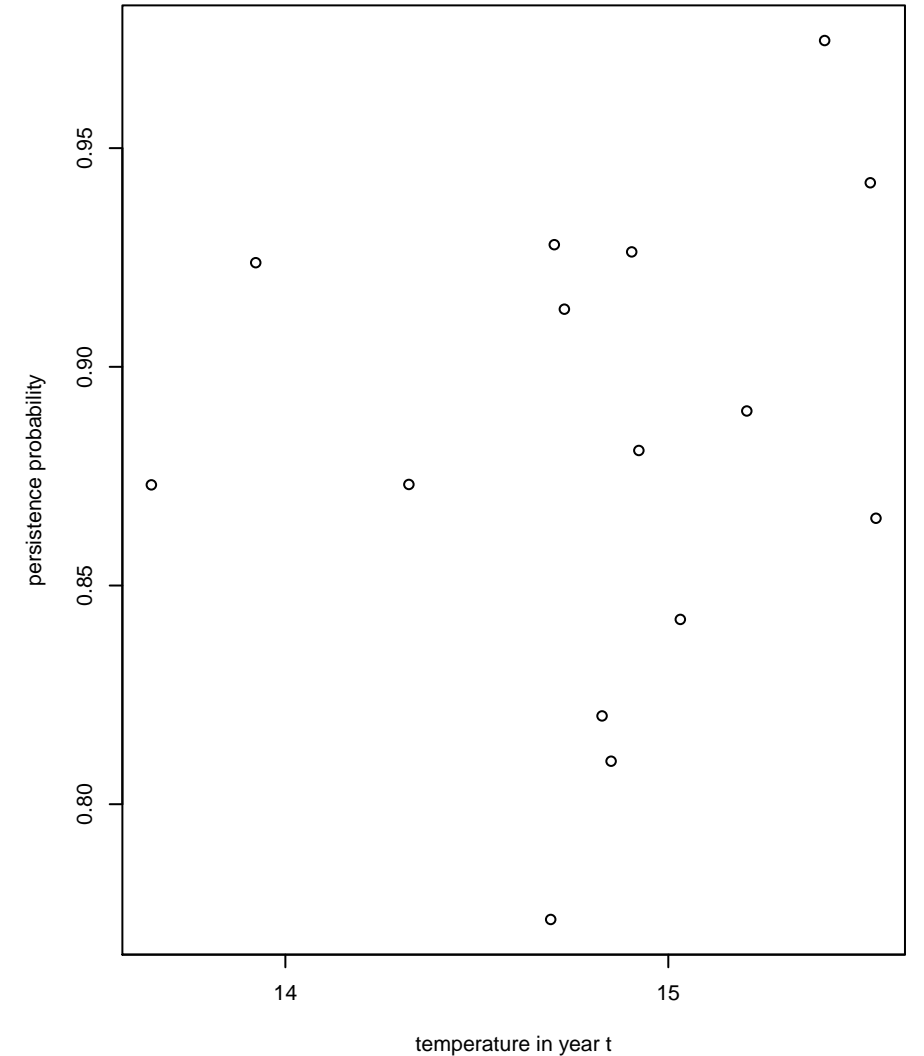

**Lacerta agilis**

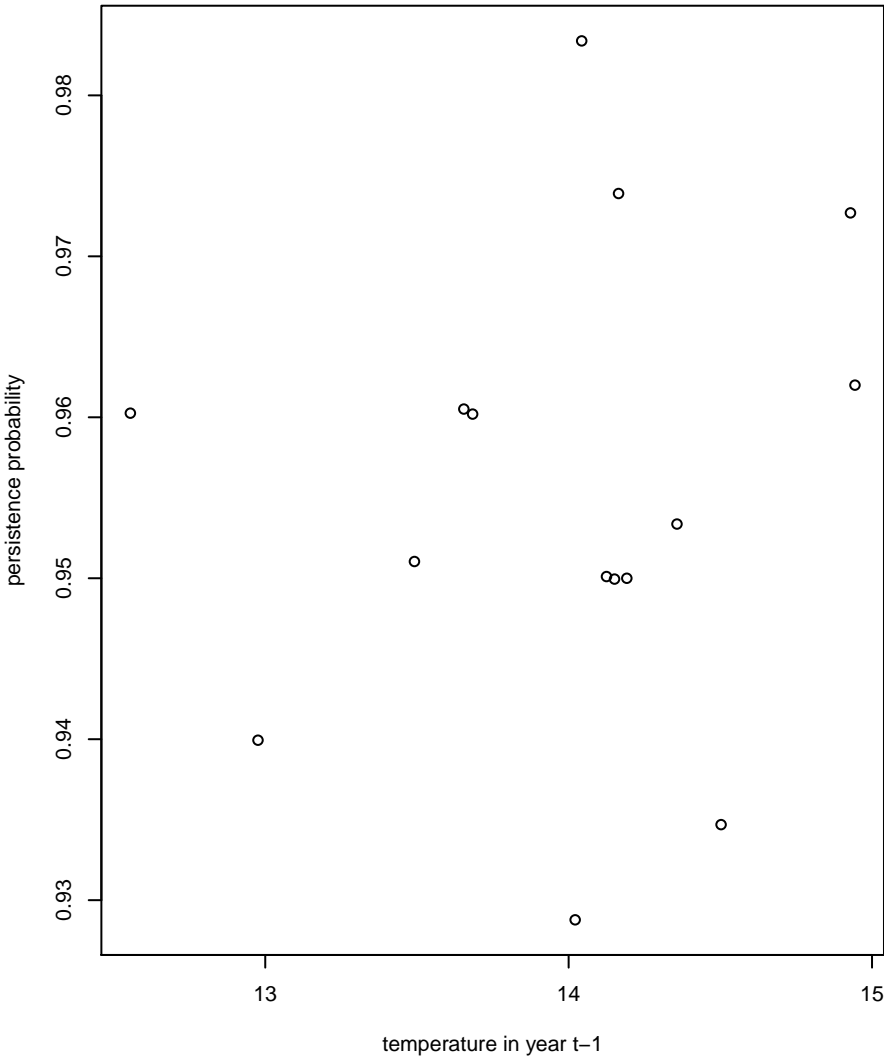

**Lacerta agilis**

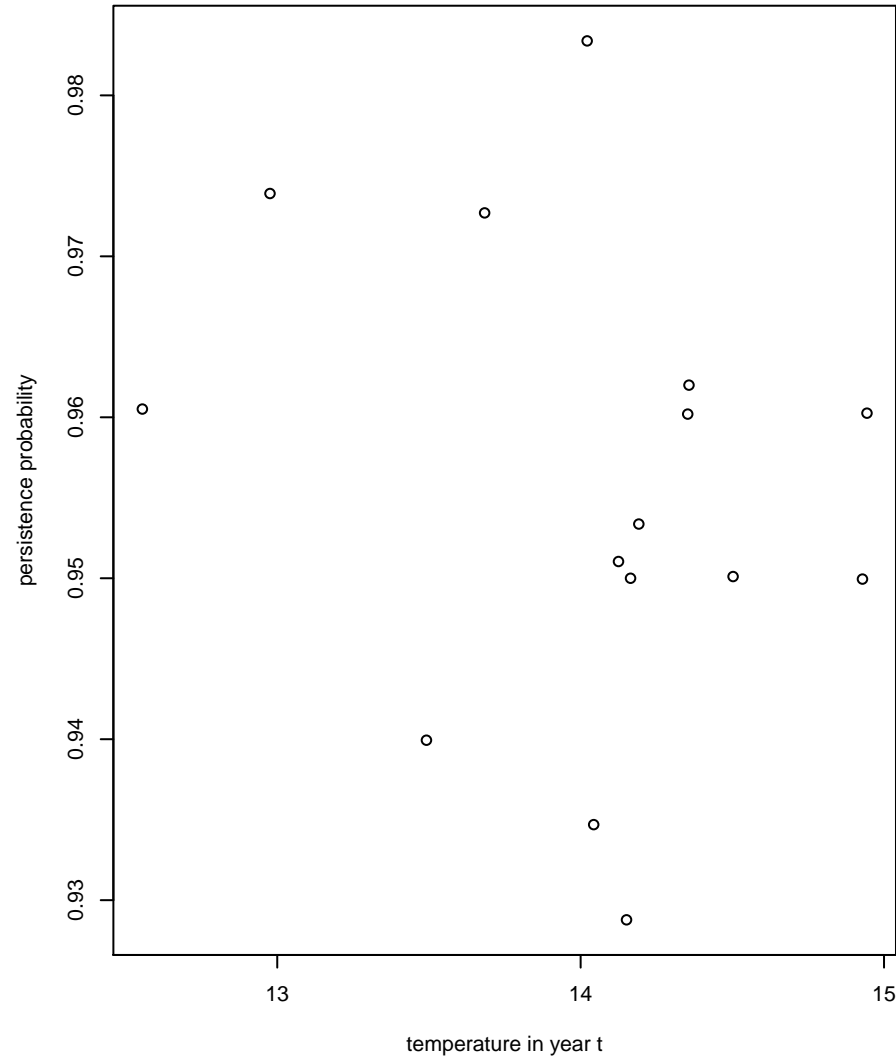

**zootocavivipara**

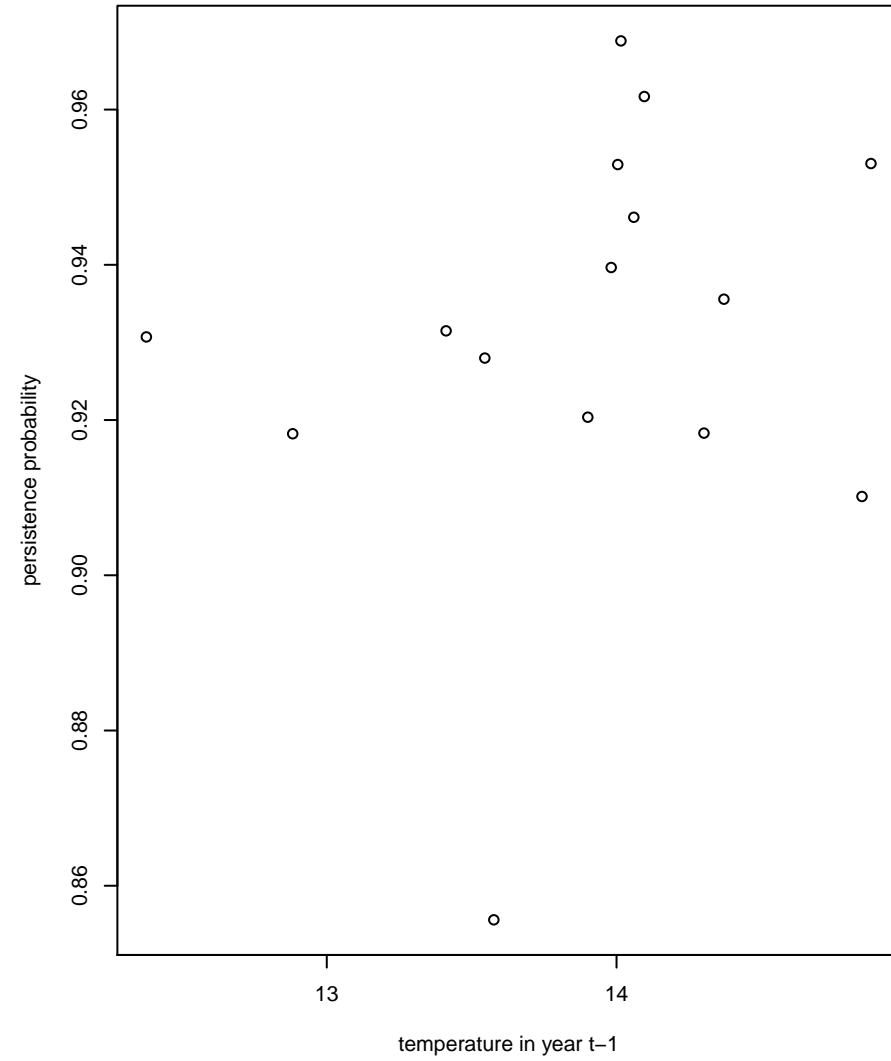

**zootocavivipara**

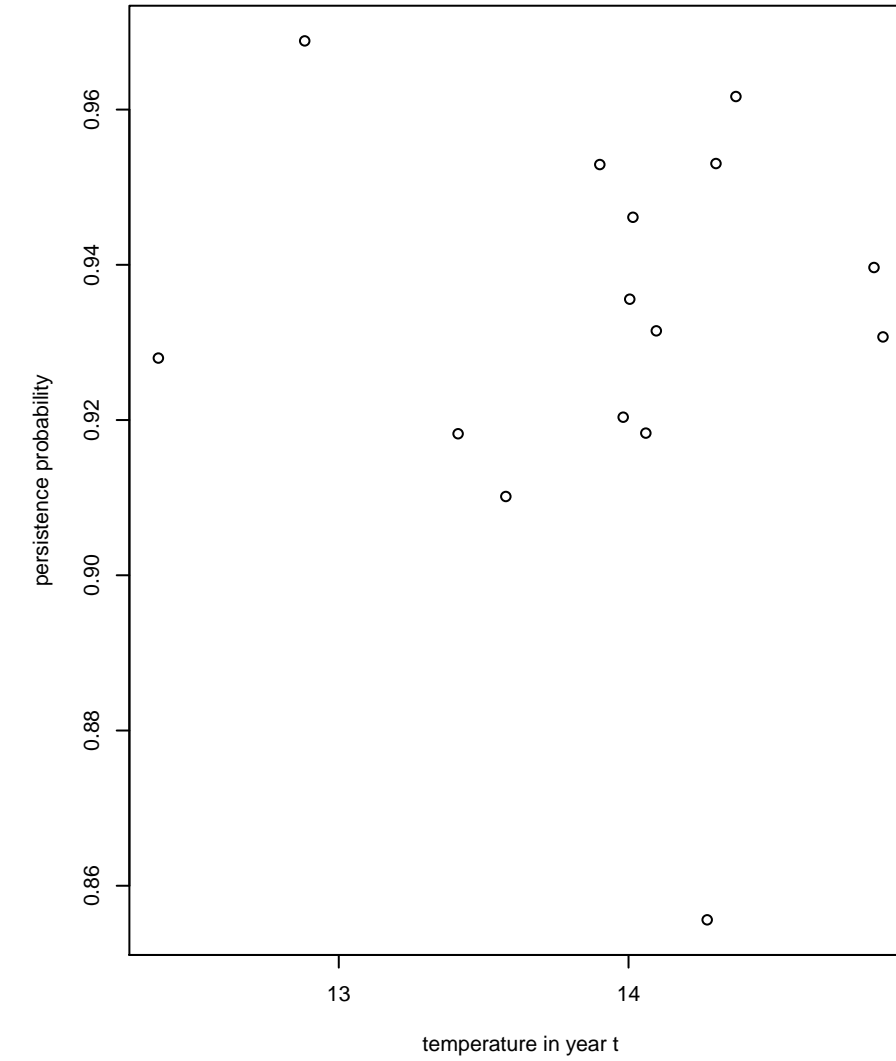

**Podarcis muralis**

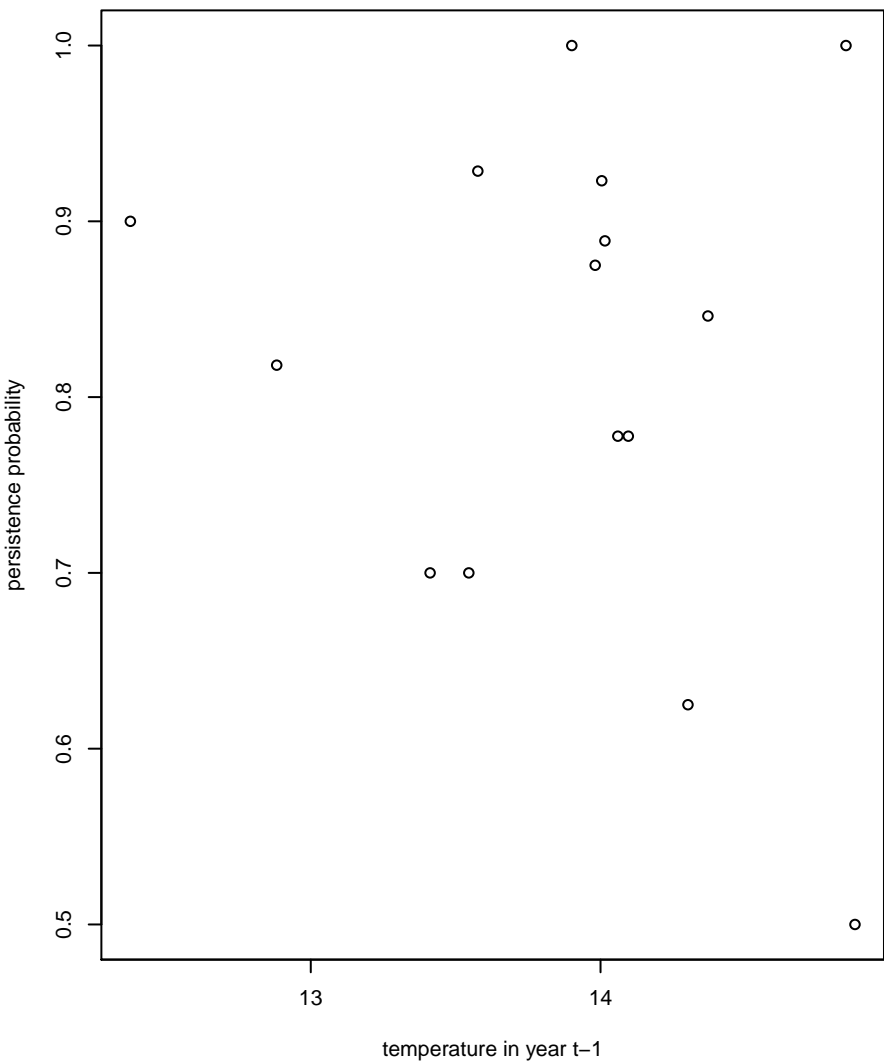

**Podarcis muralis**

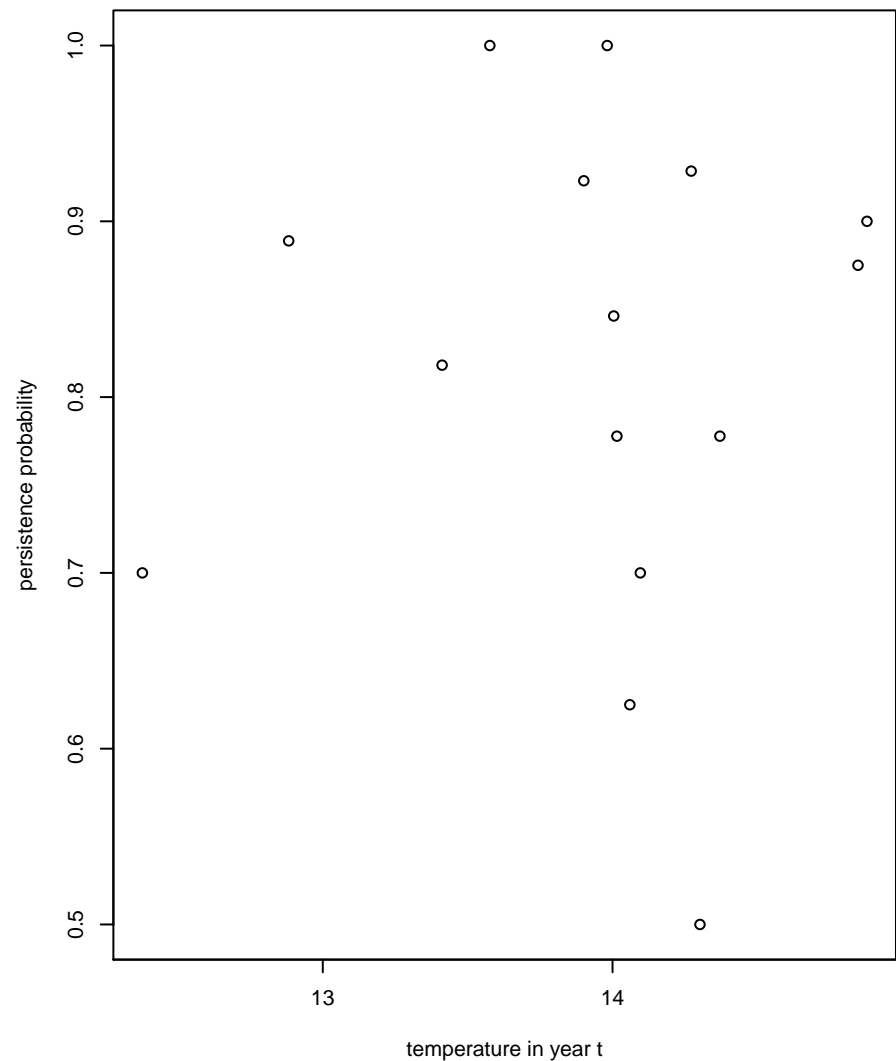

**Coronella austriaca**

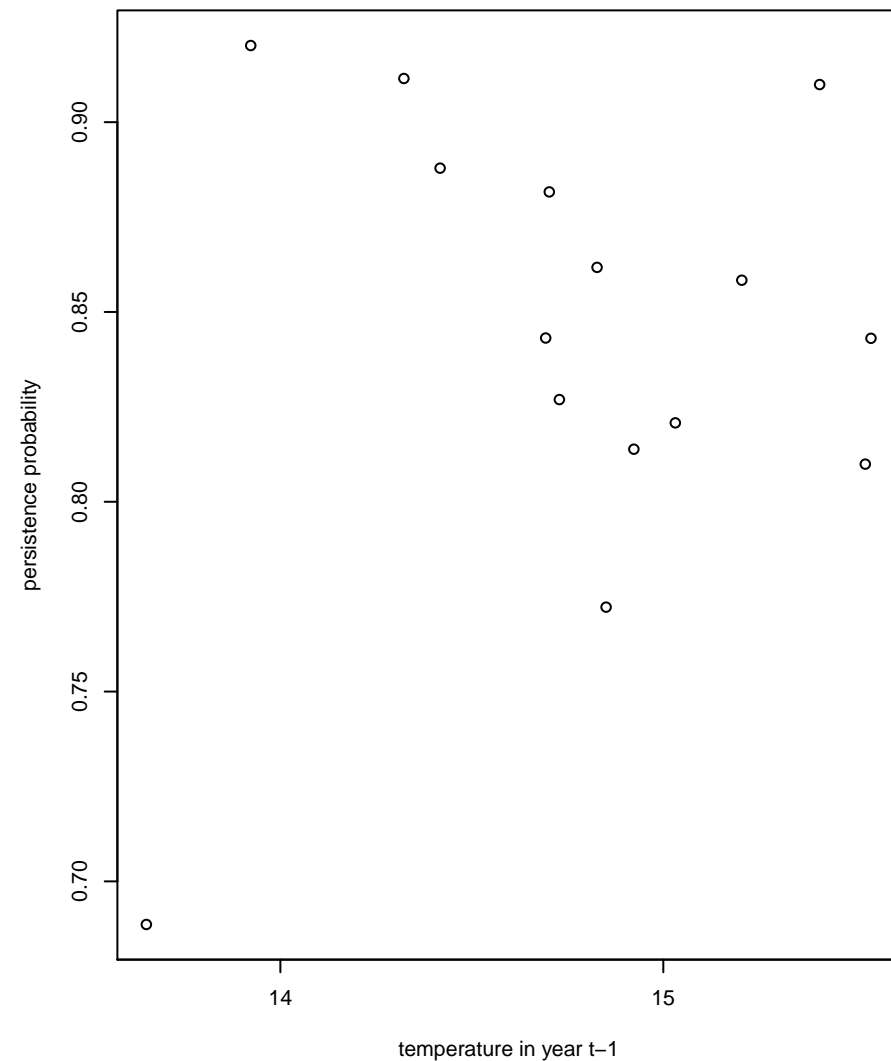

**Coronella austriaca**

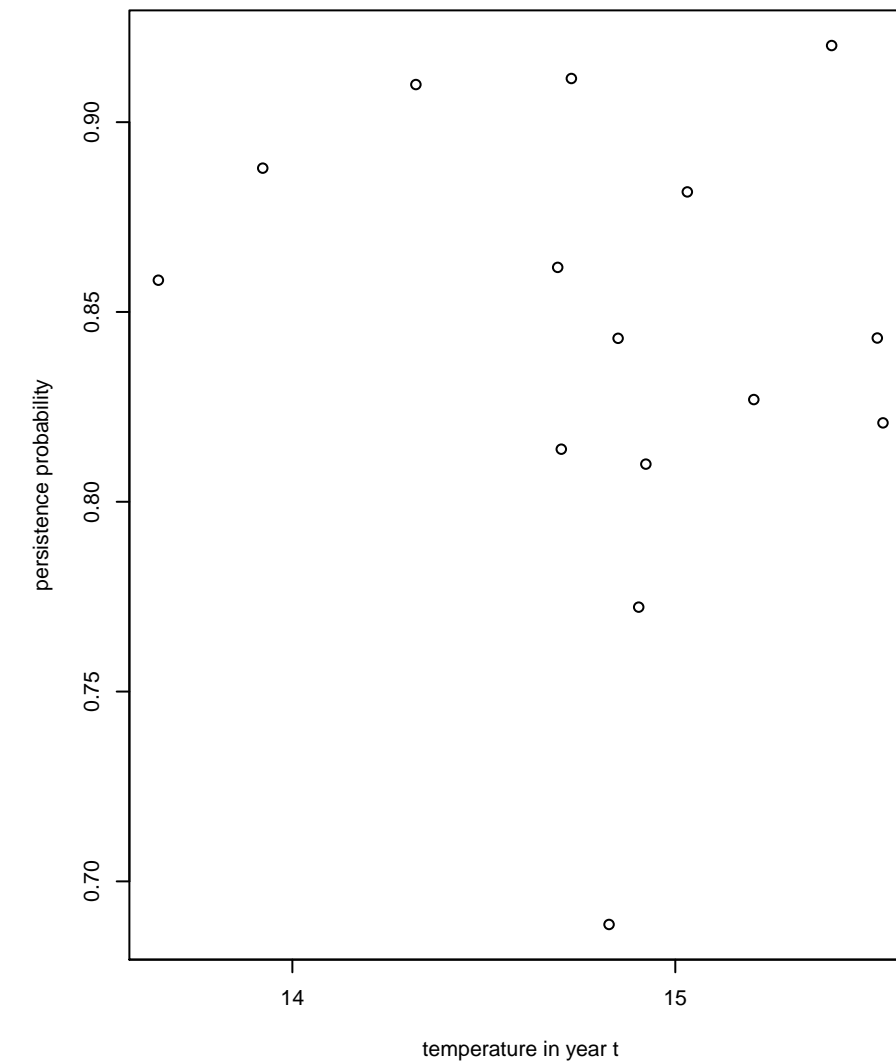

**Natrix natrix**

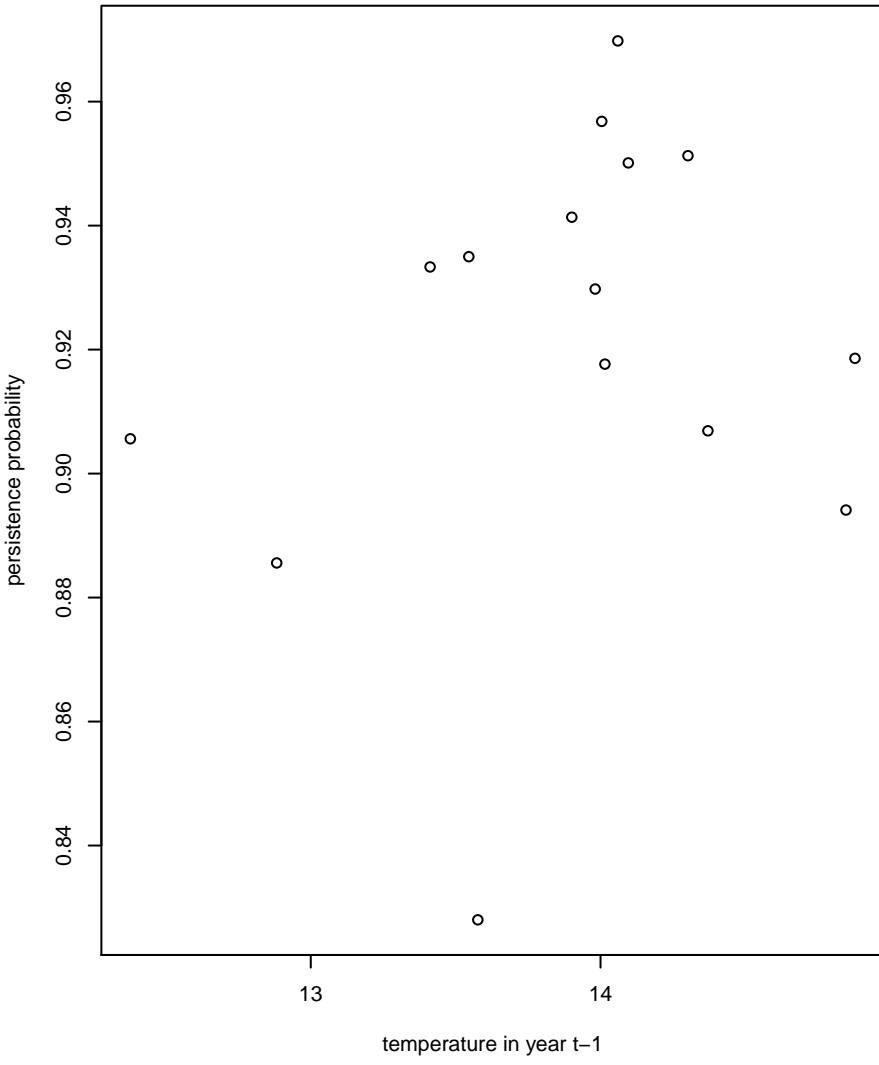

**Natrix natrix**

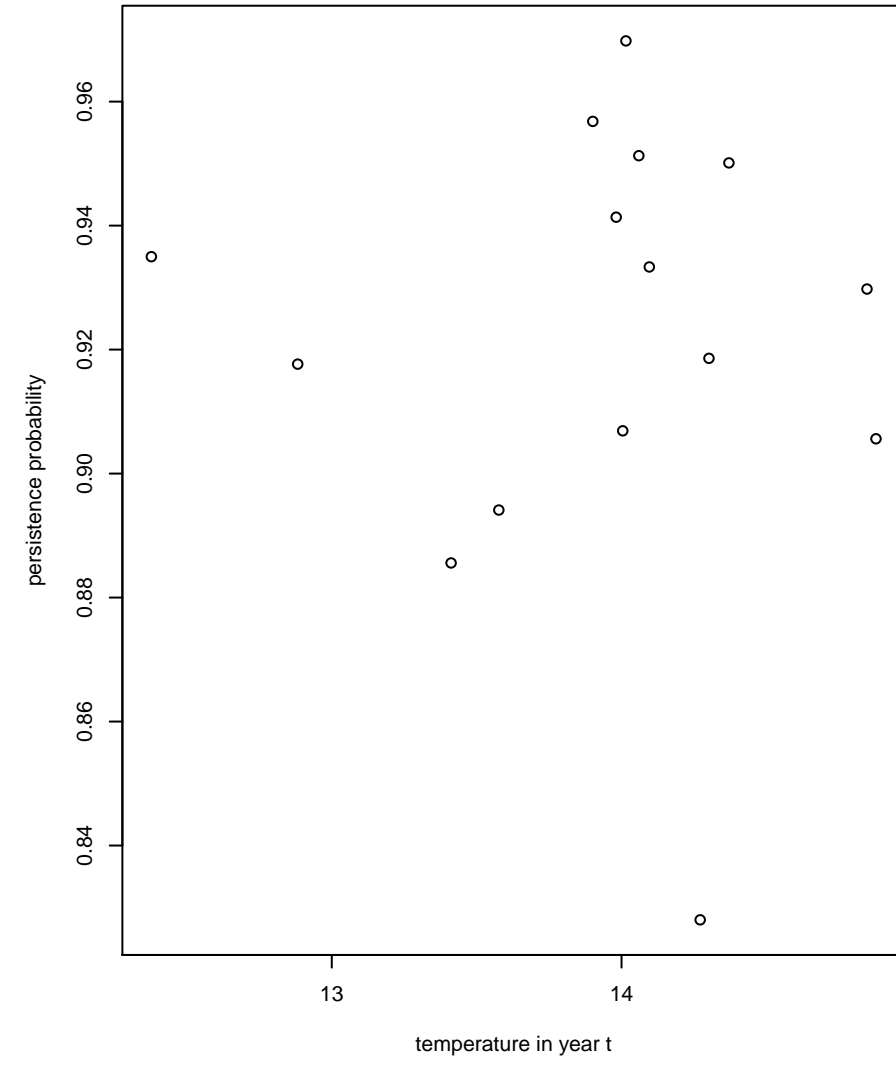

**Vipera berus**

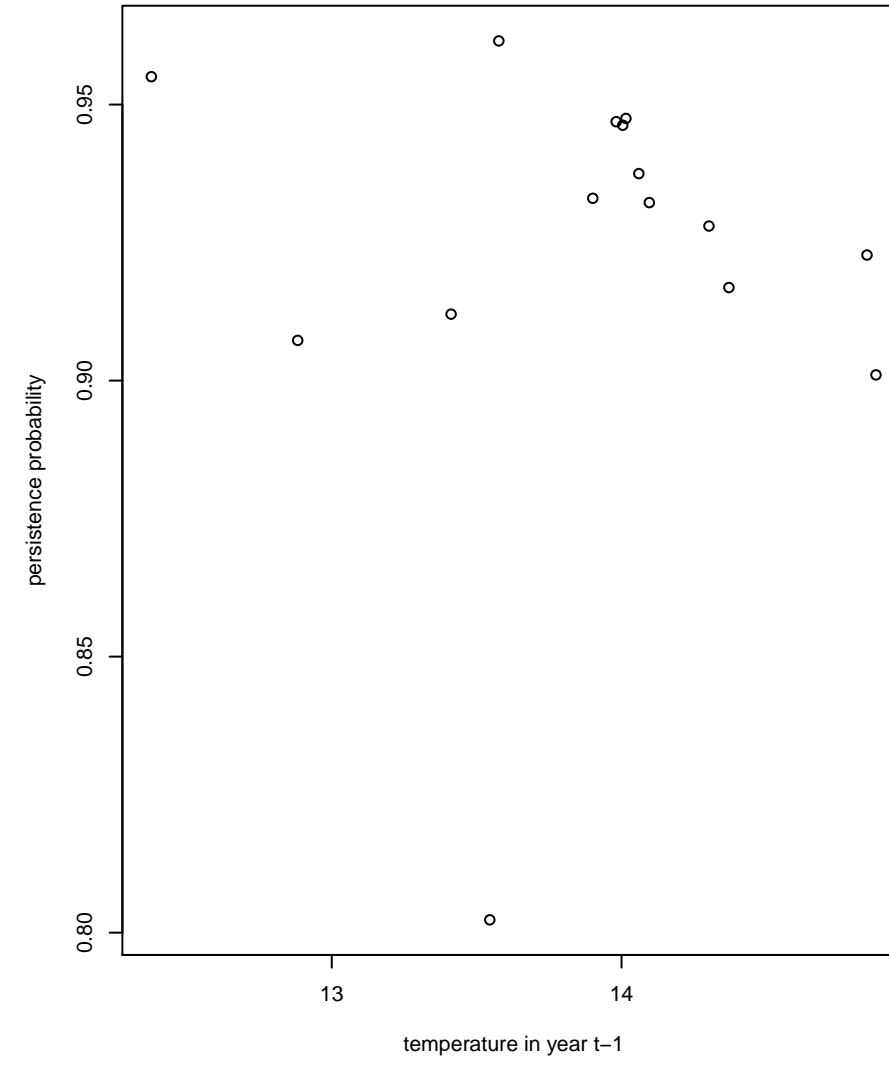

**Vipera berus**

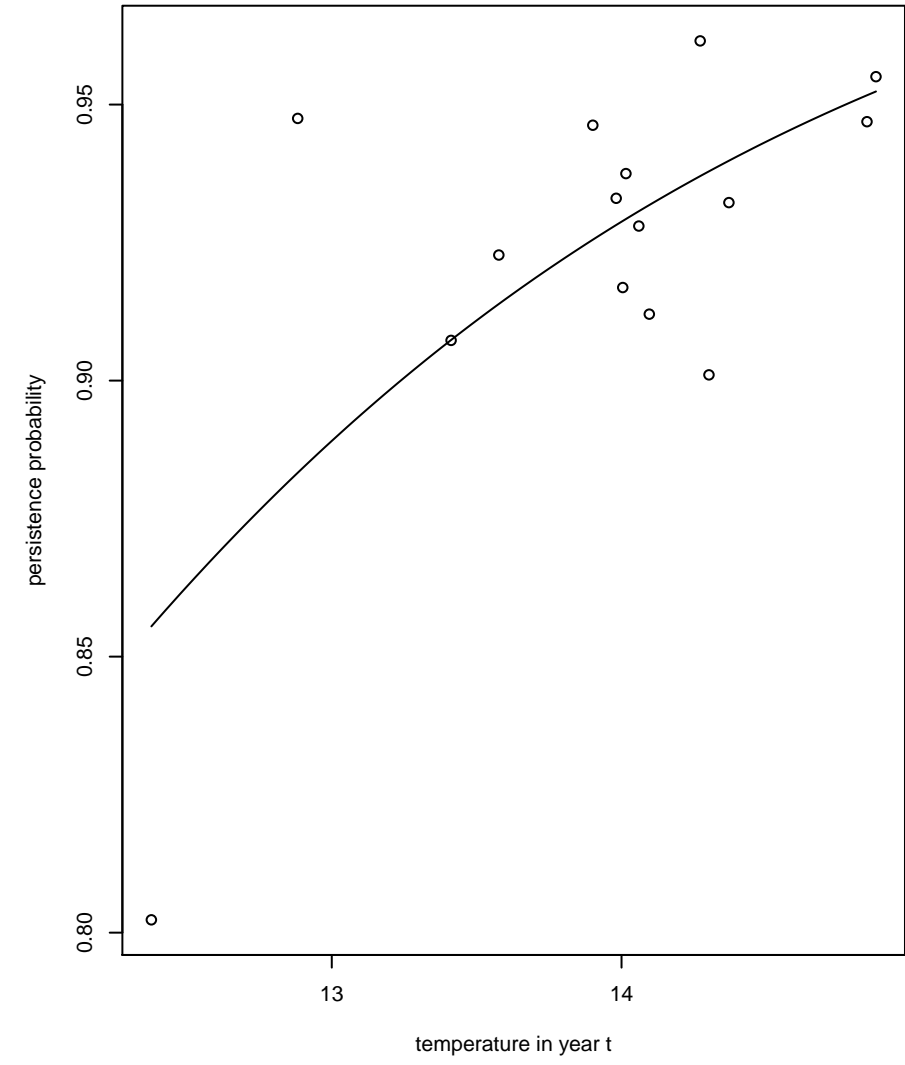

**Chorthippus albomarginatus**

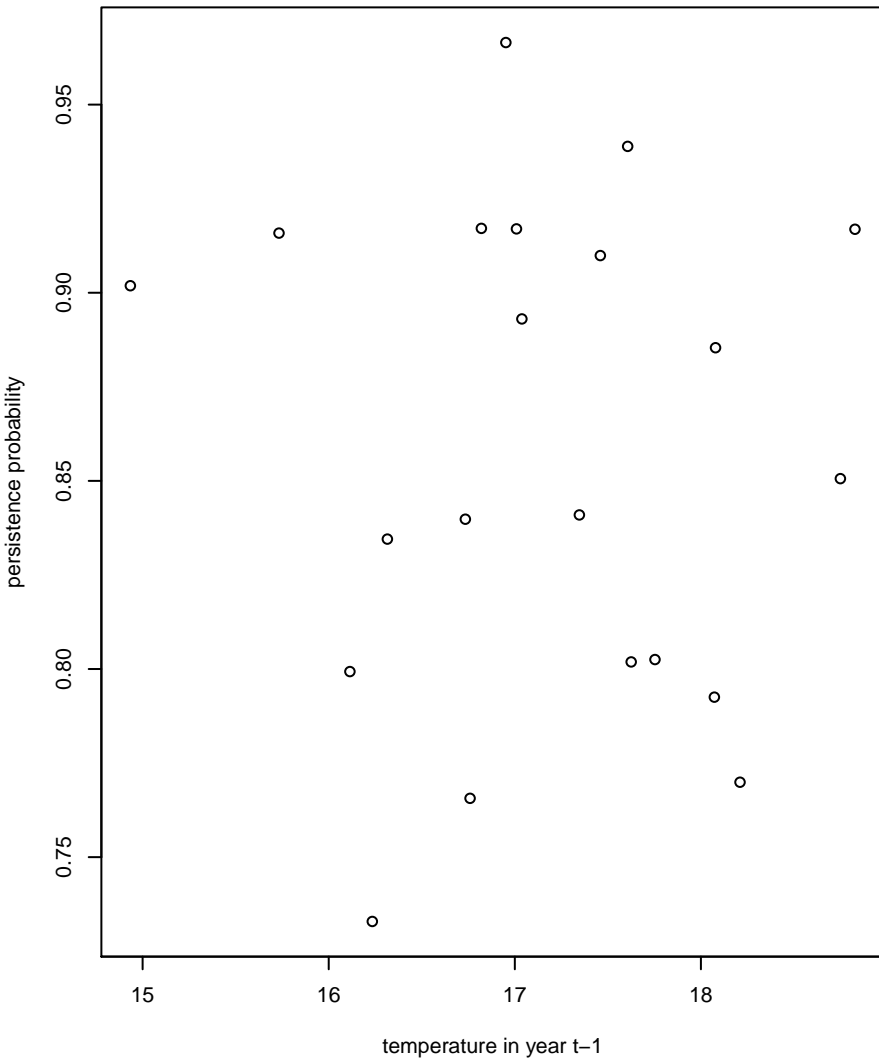

**Chorthippus albomarginatus**

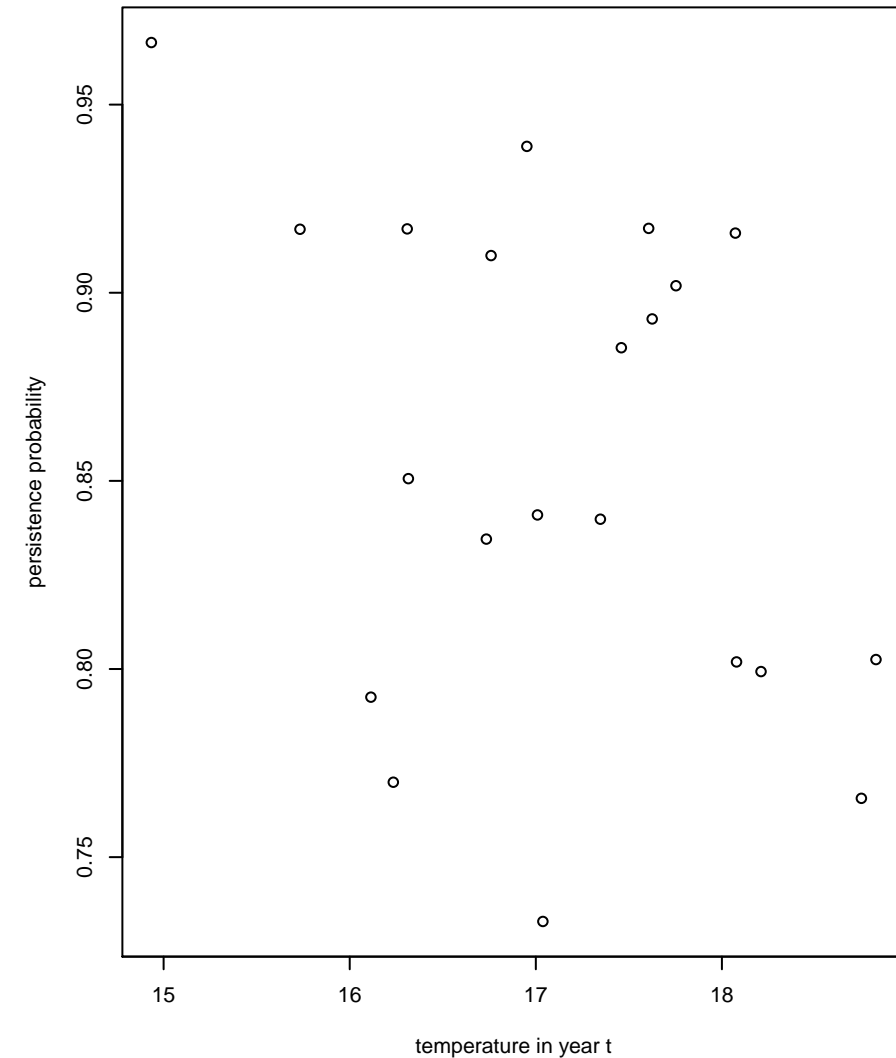

**Chorthippus biguttulus**

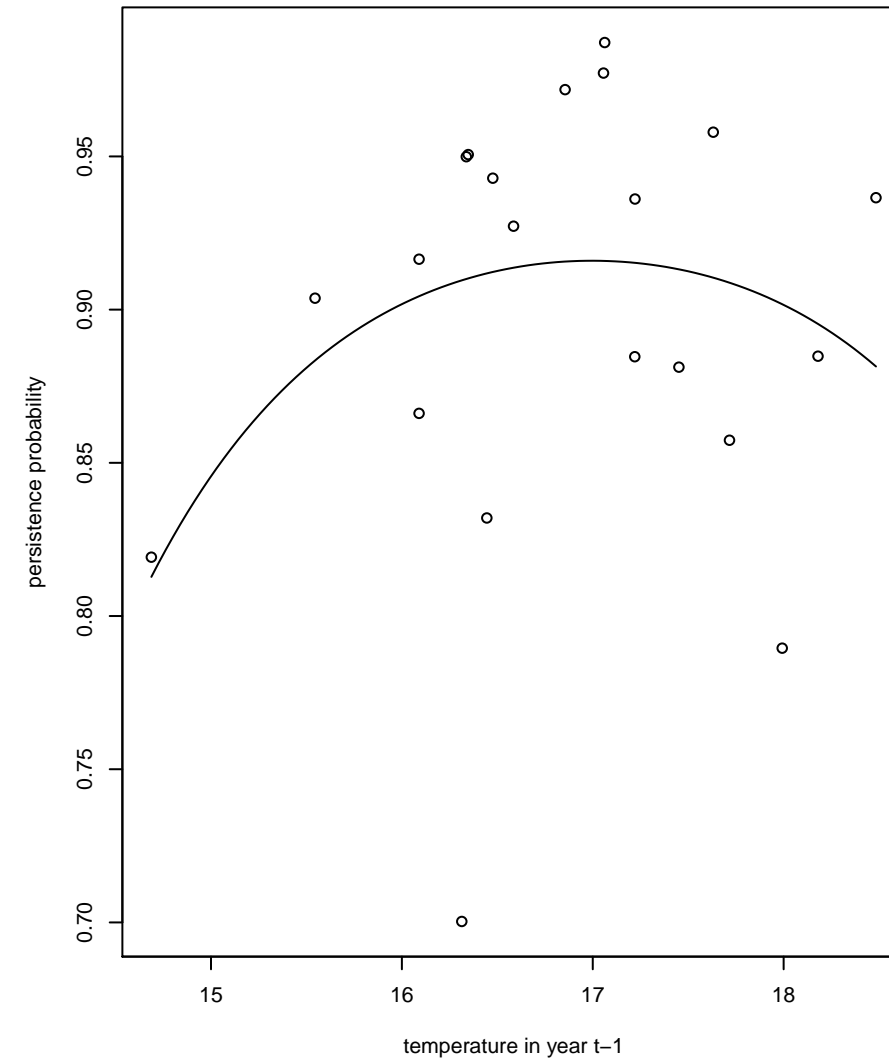

**Chorthippus biguttulus**

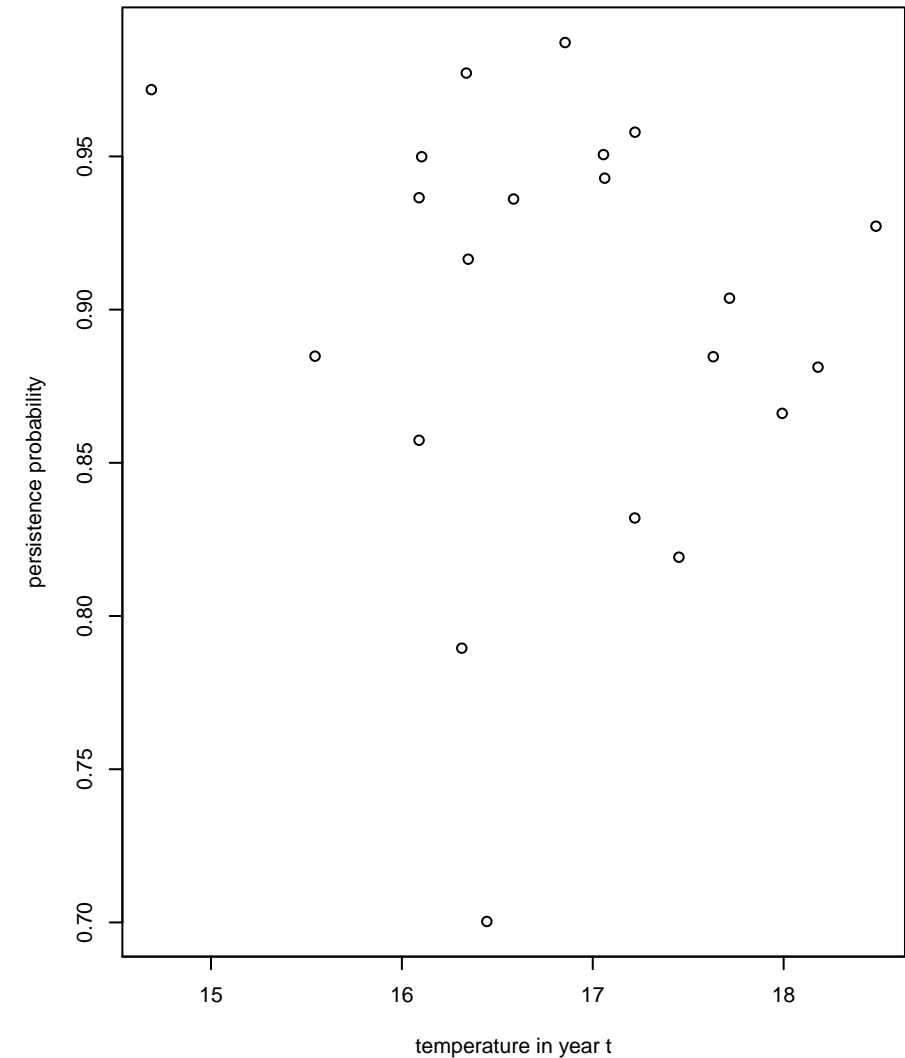

**Chorthippus brunneus**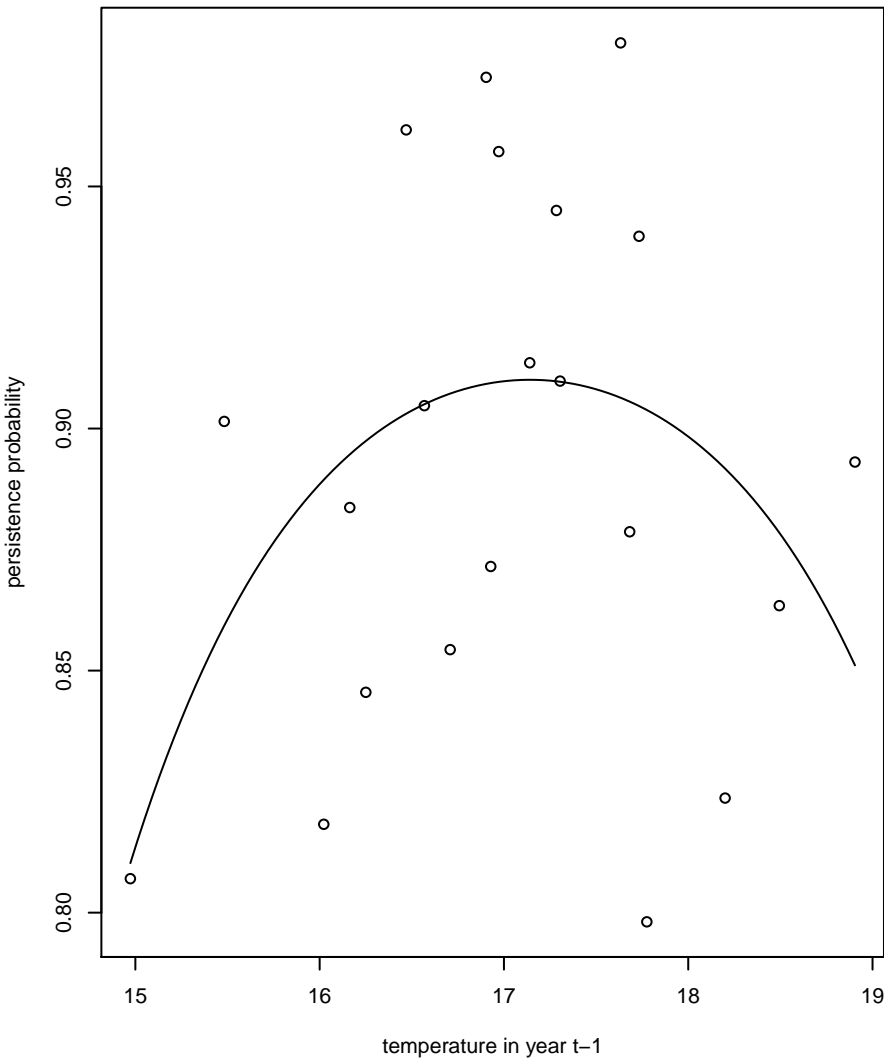**Chorthippus brunneus**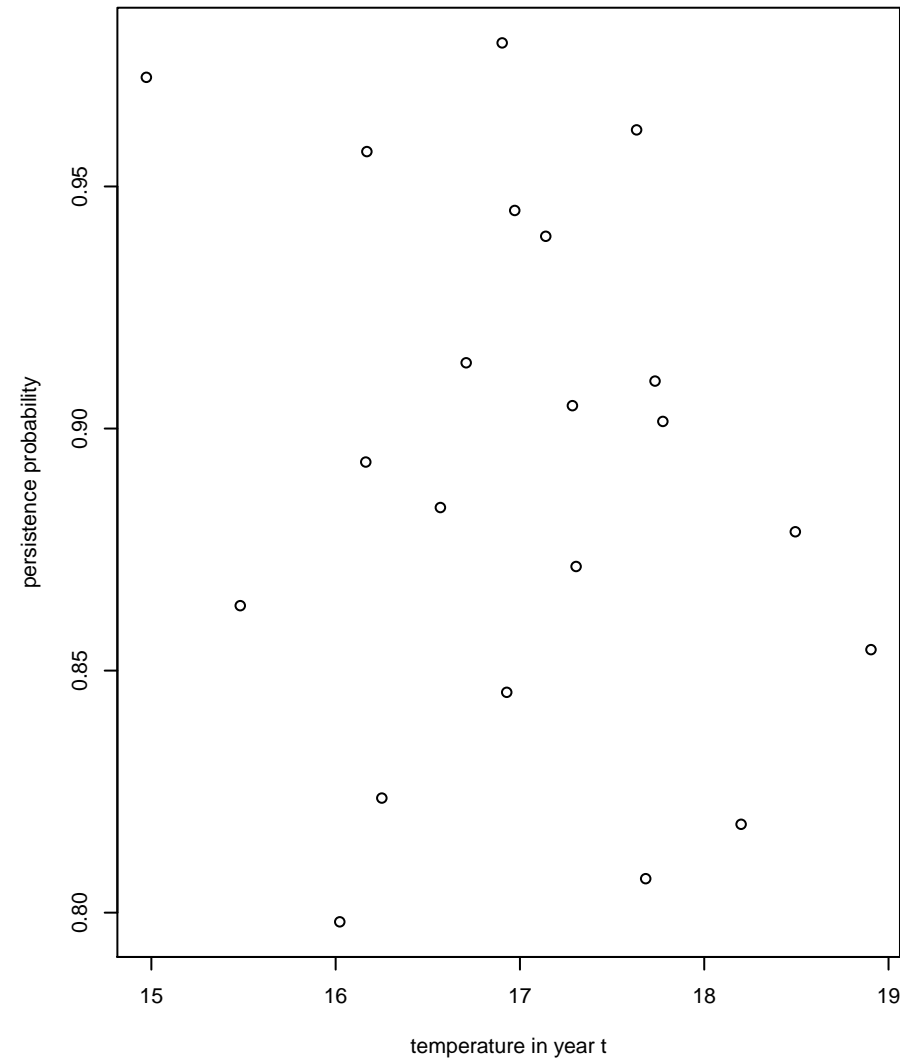**Chorthippus mollis**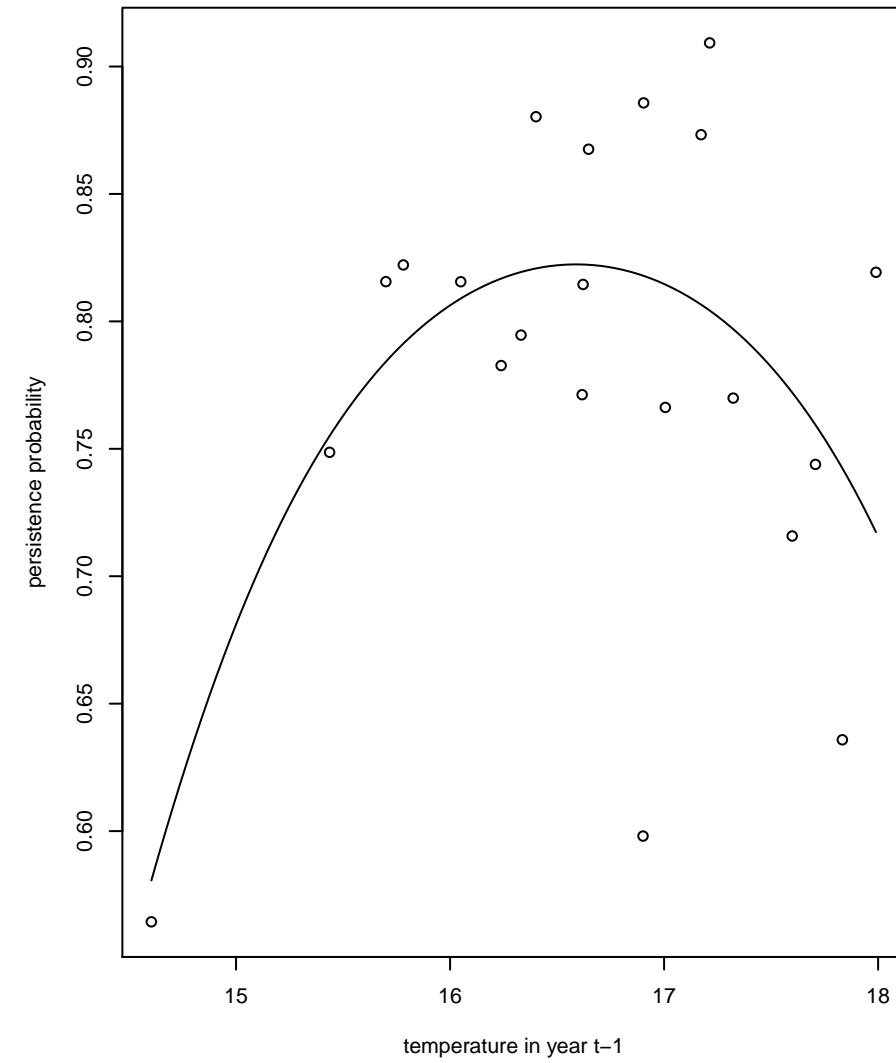**Chorthippus mollis**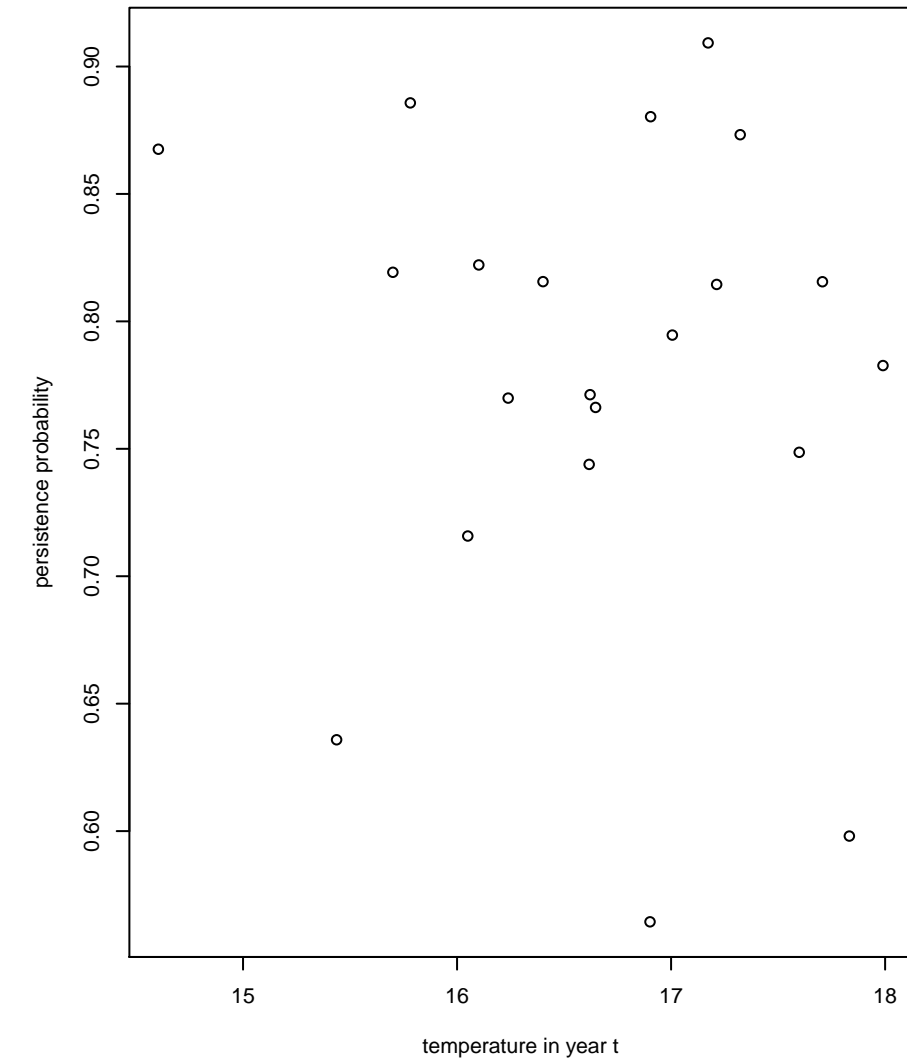**Chorthippus montanus**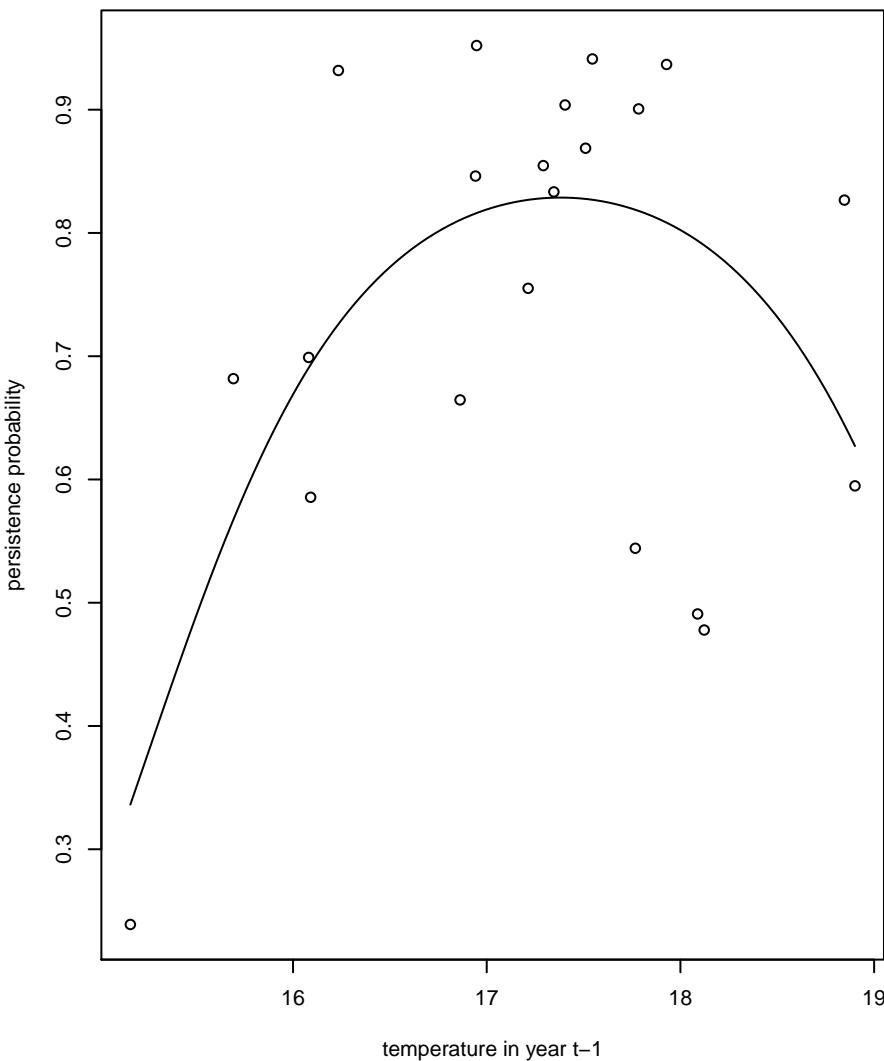**Chorthippus montanus**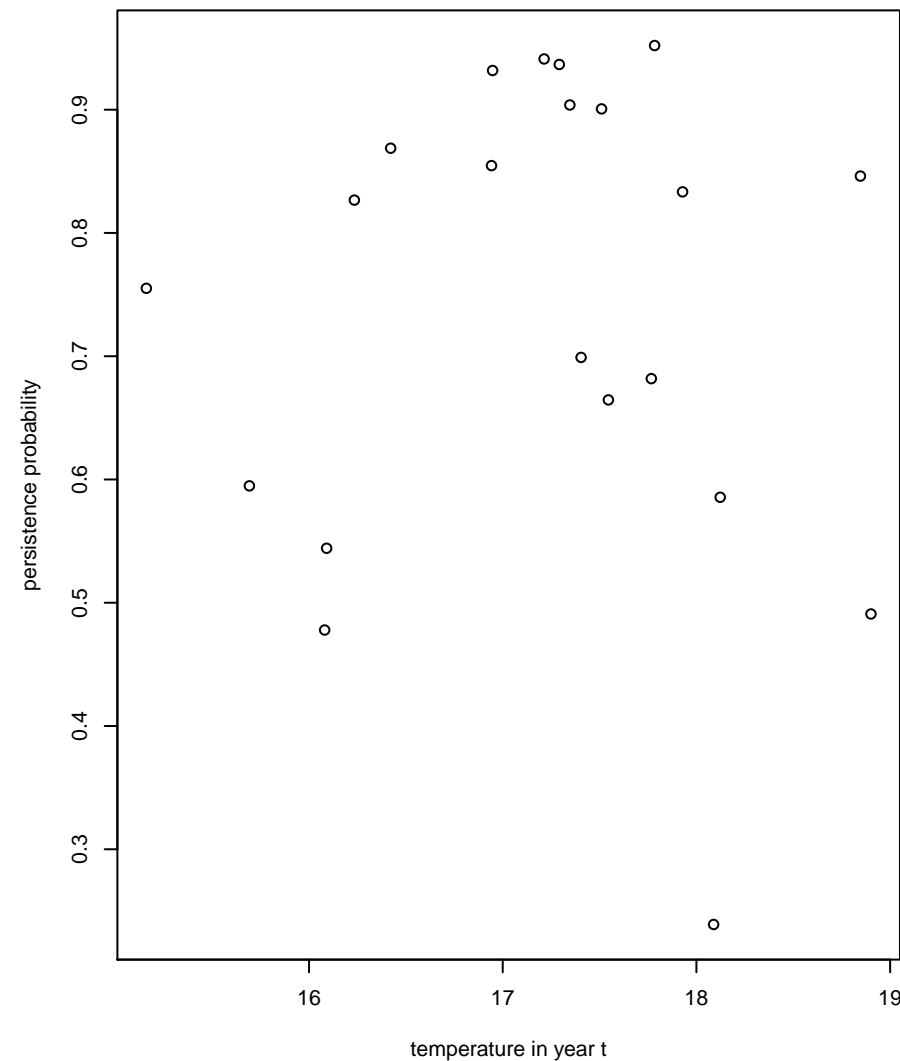**Chorthippus parallelus**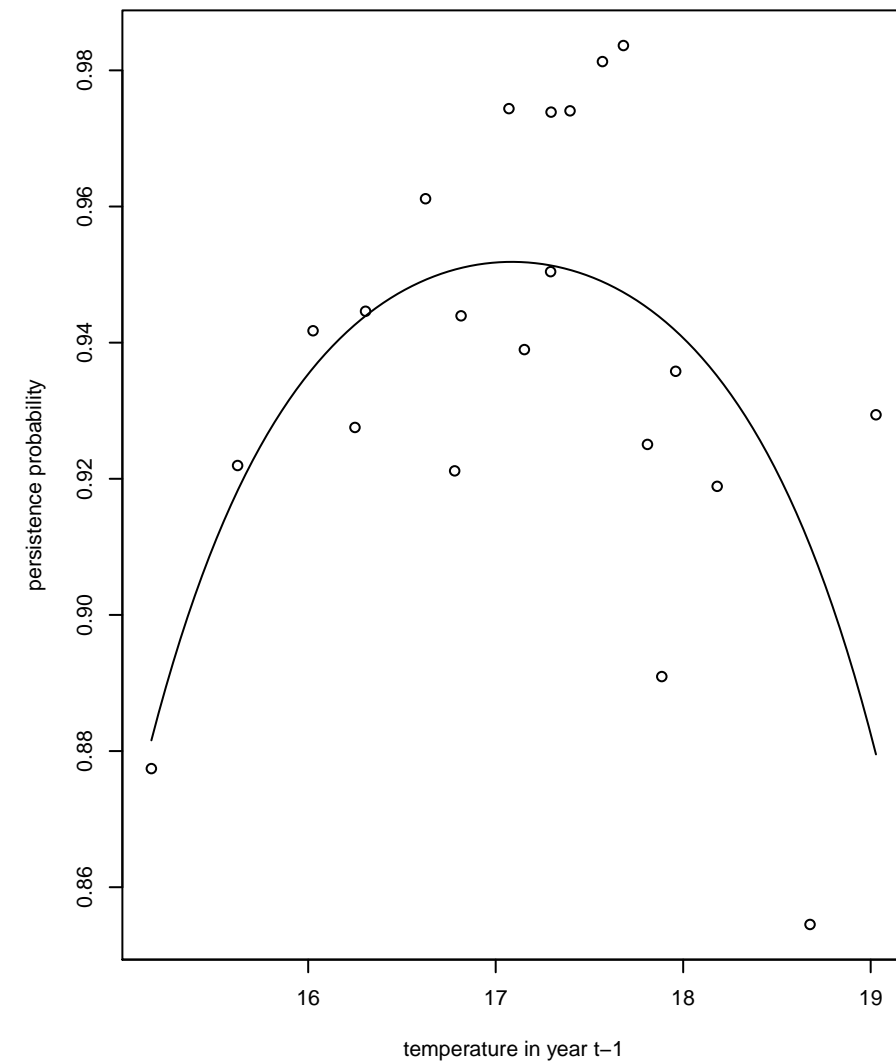**Chorthippus parallelus**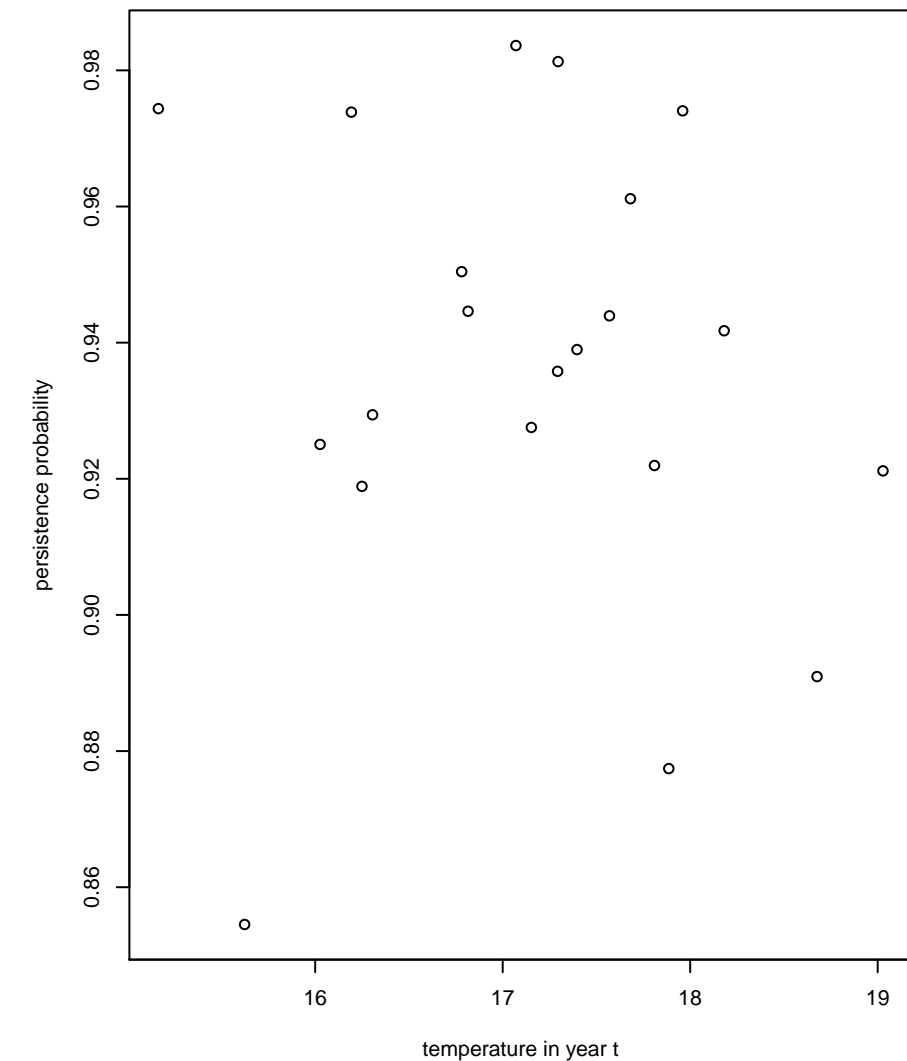

**Chrysochraon dispar**

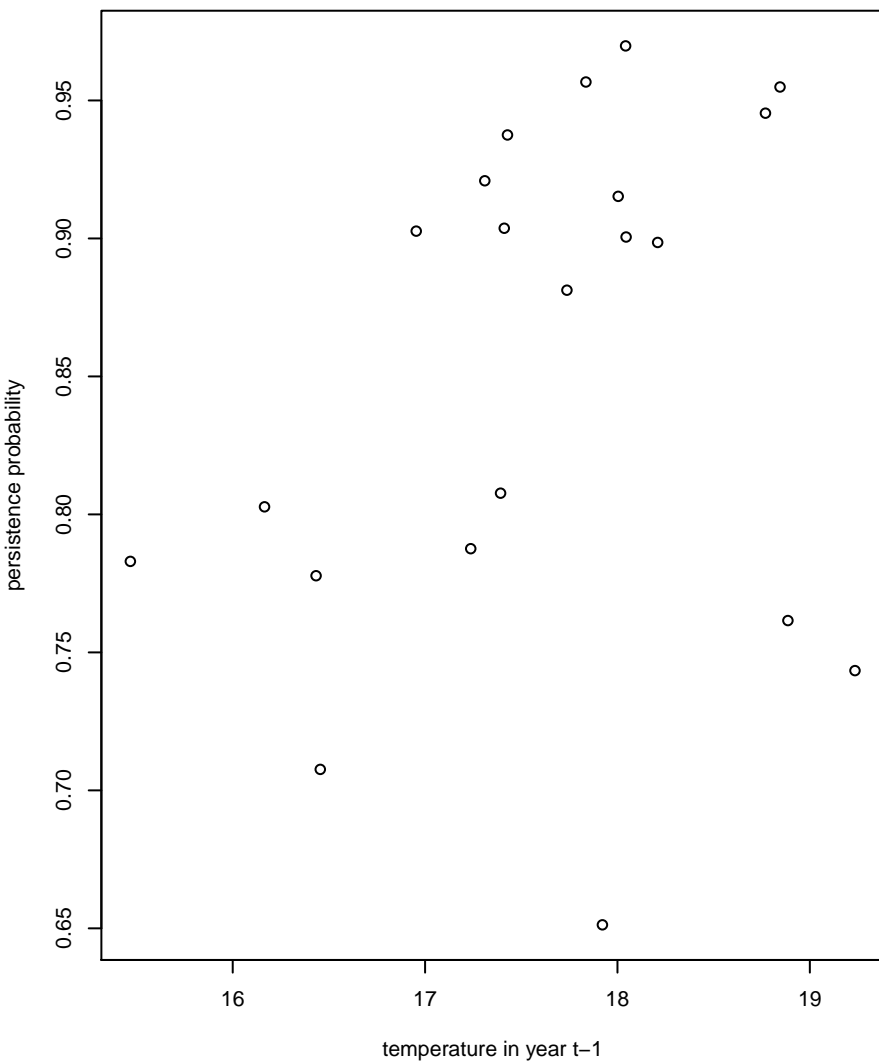

**Chrysochraon dispar**

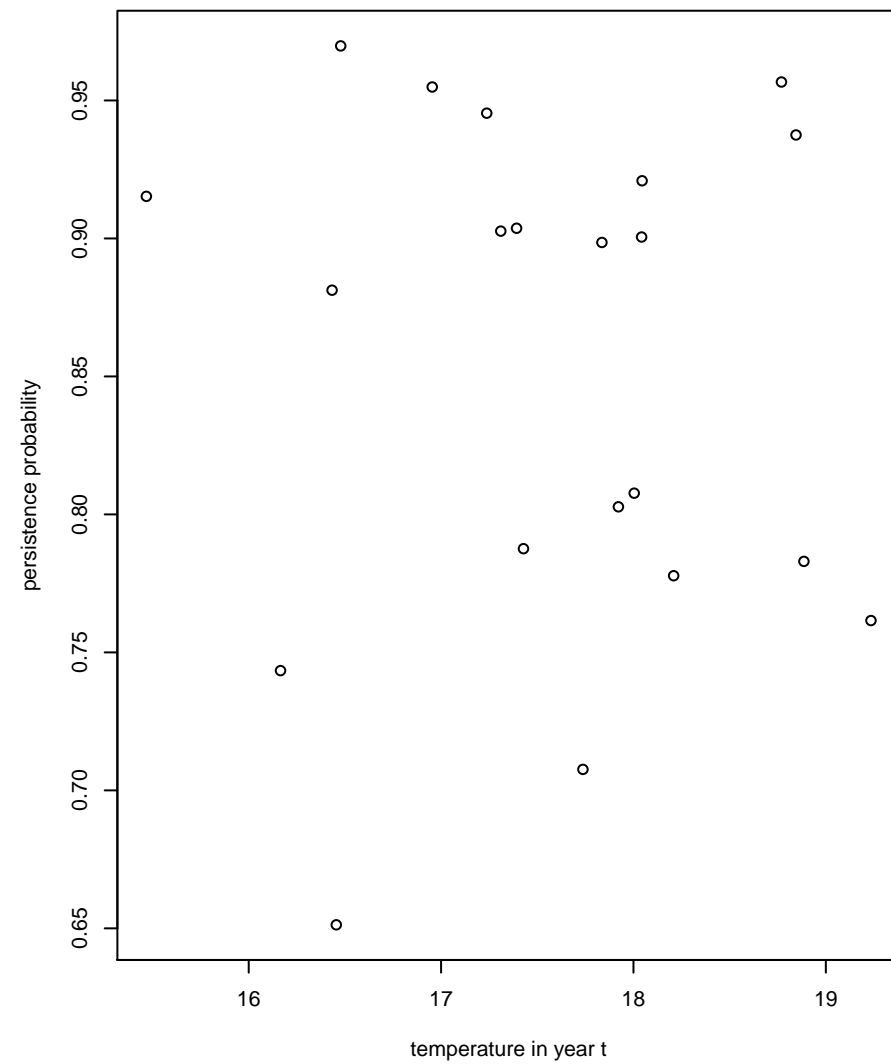

**Conocephalus discolor**

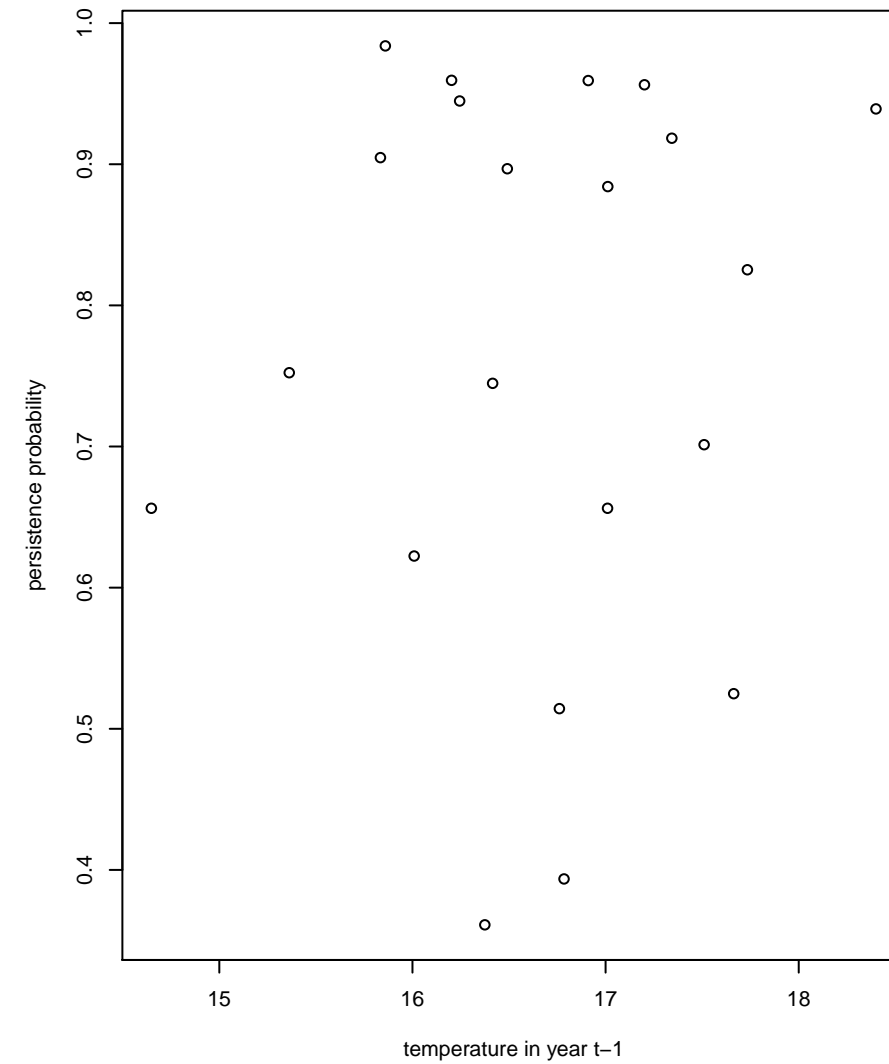

**Conocephalus discolor**

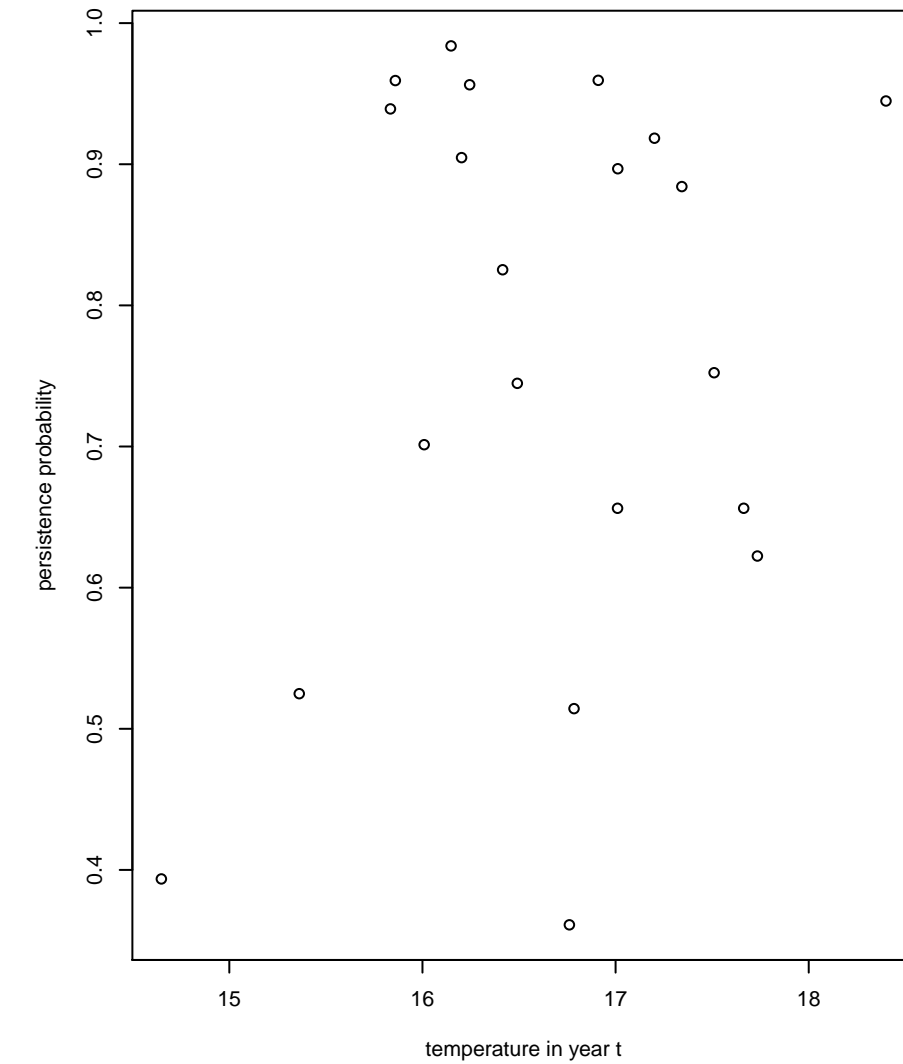

**Conocephalus dorsalis**

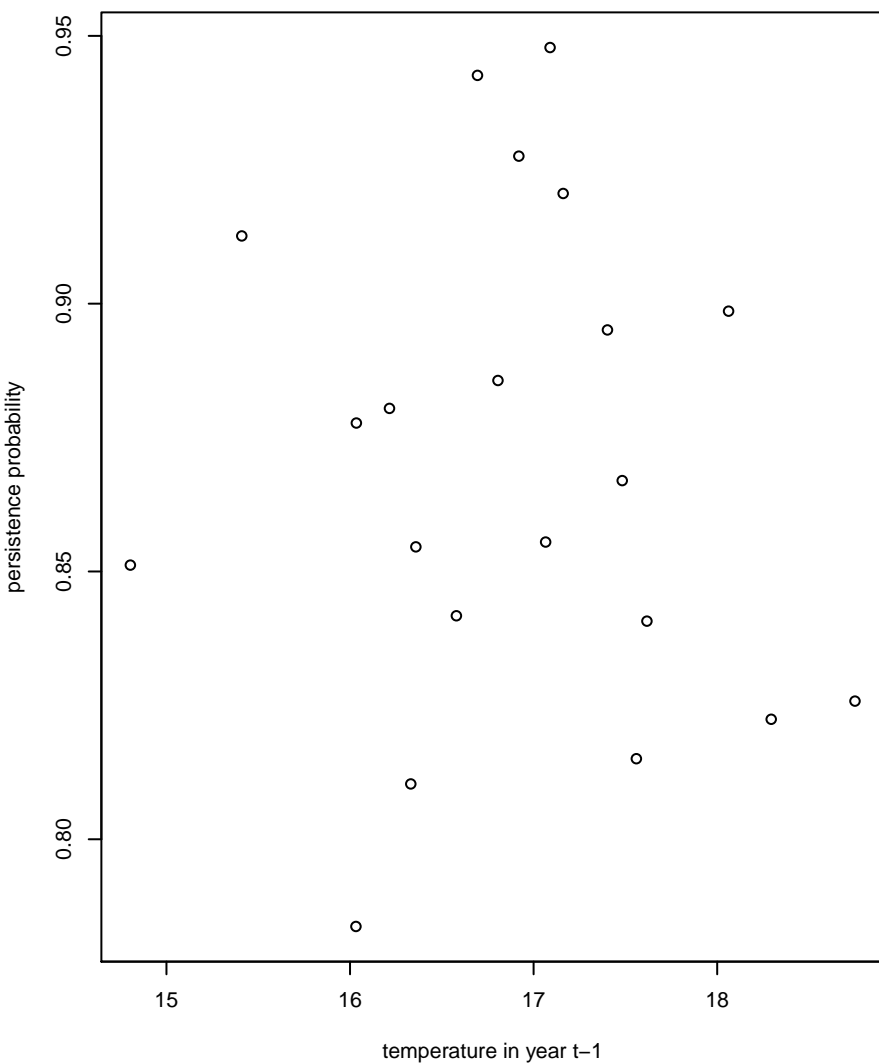

**Conocephalus dorsalis**

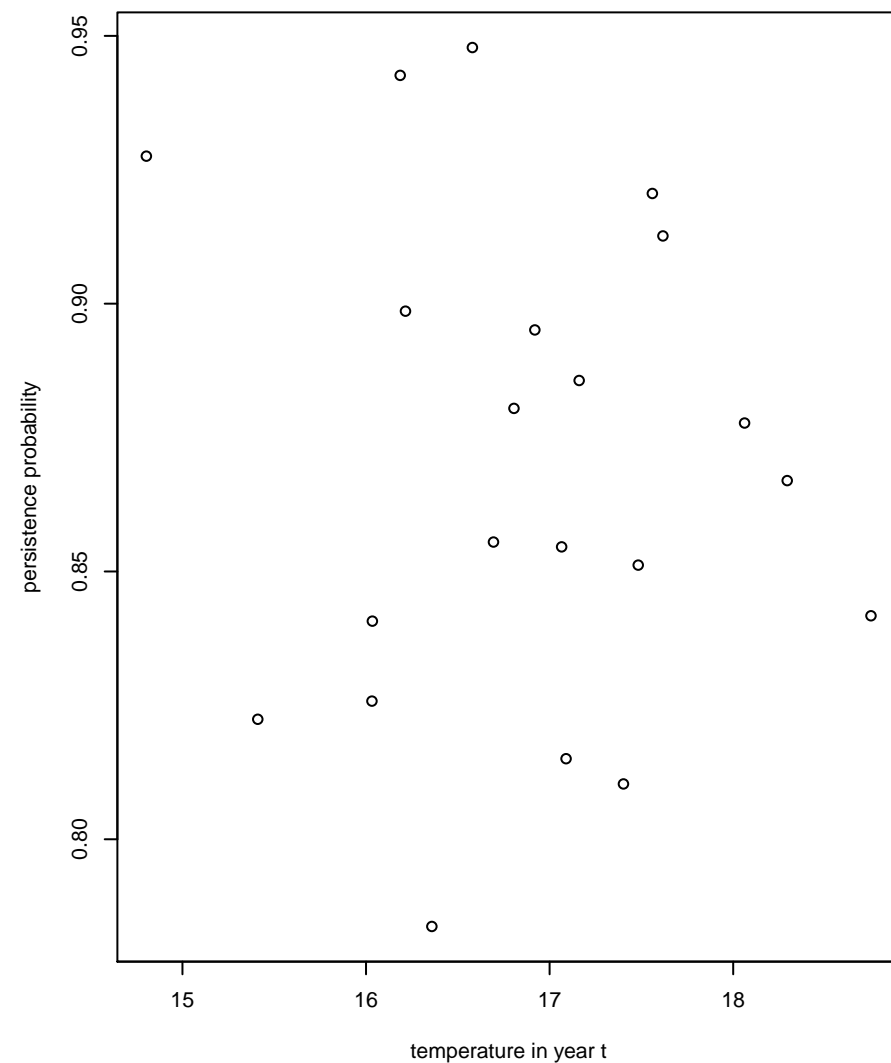

**Ephippiger ephippiger**

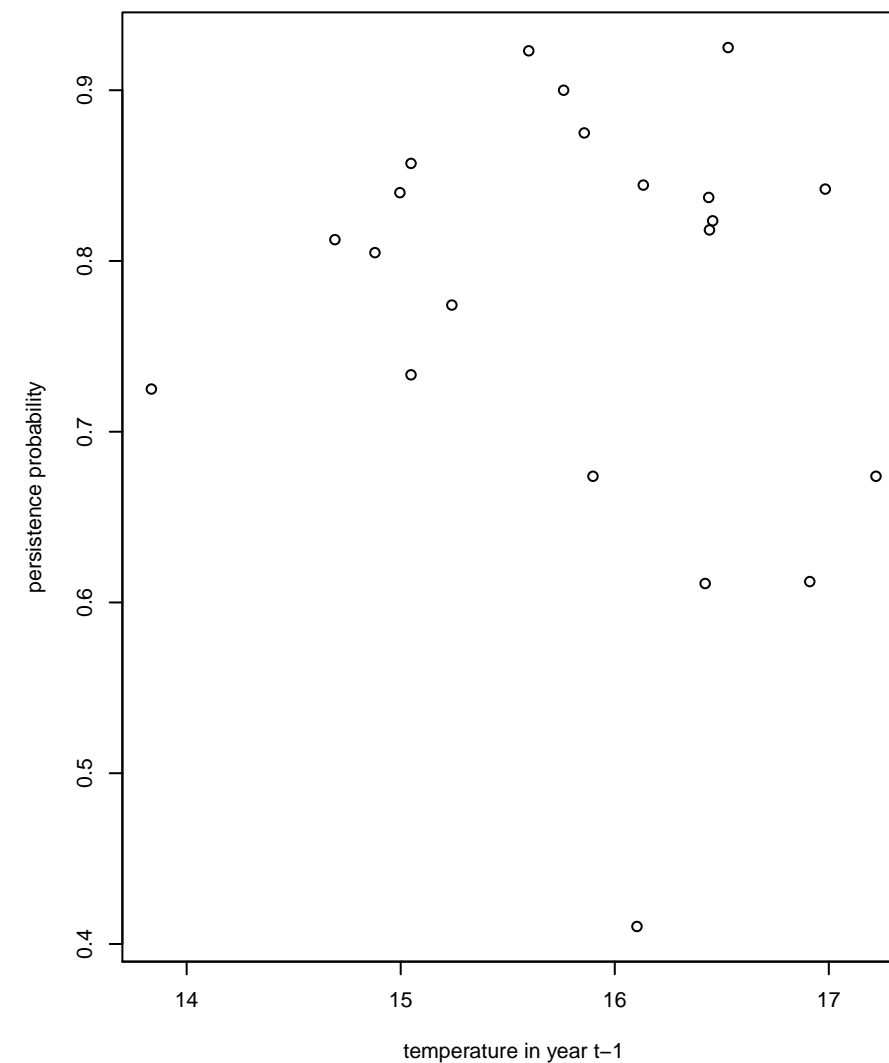

**Ephippiger ephippiger**

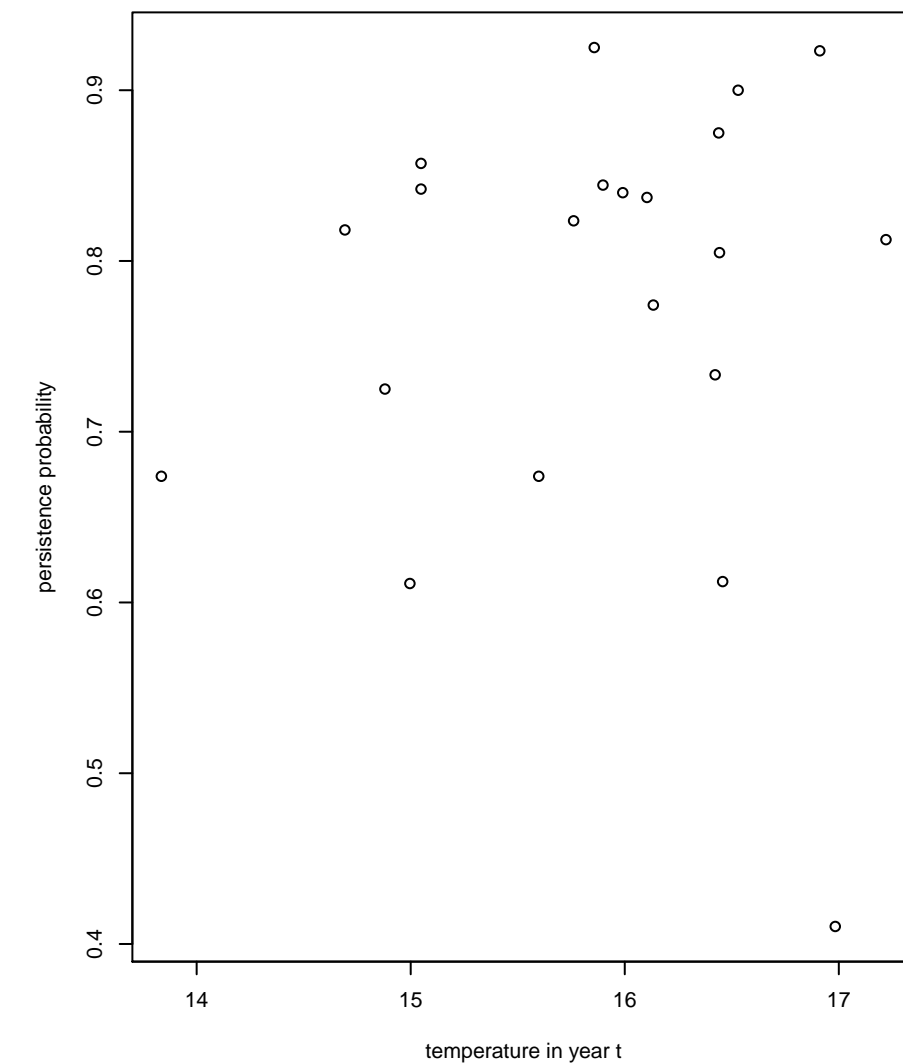

**Leptophyes punctatissima**

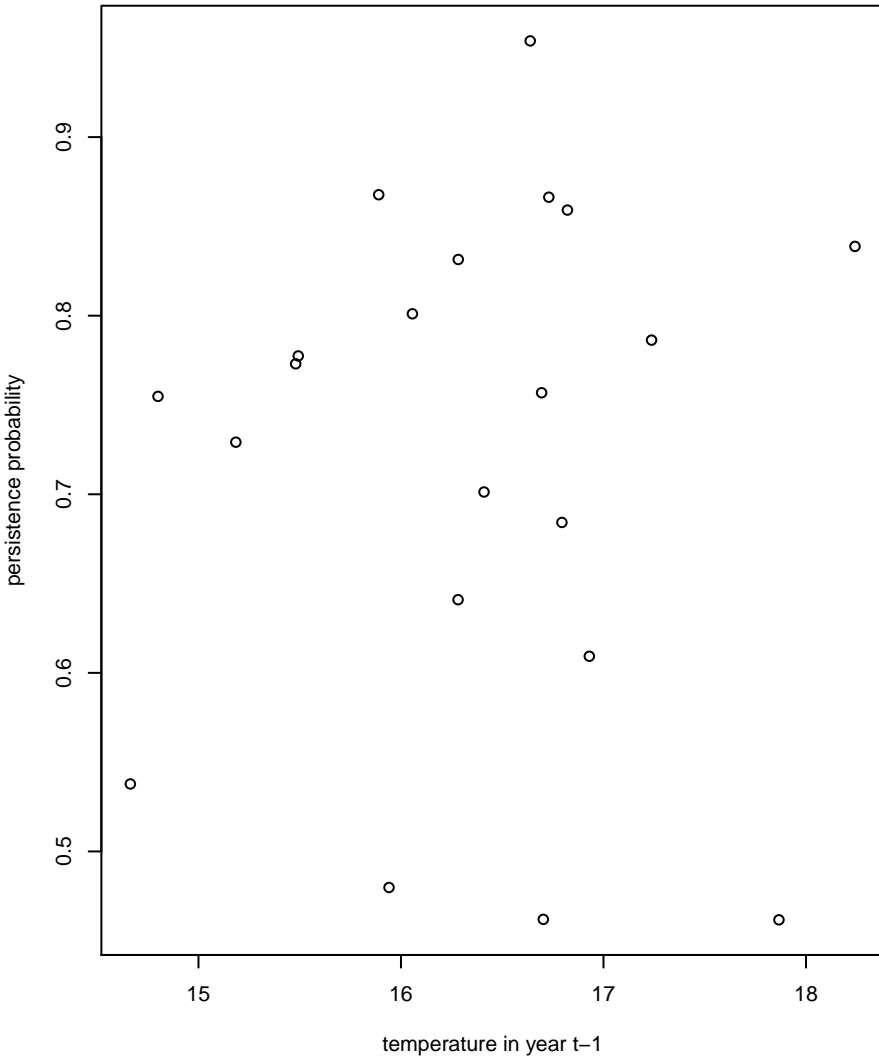

**Leptophyes punctatissima**

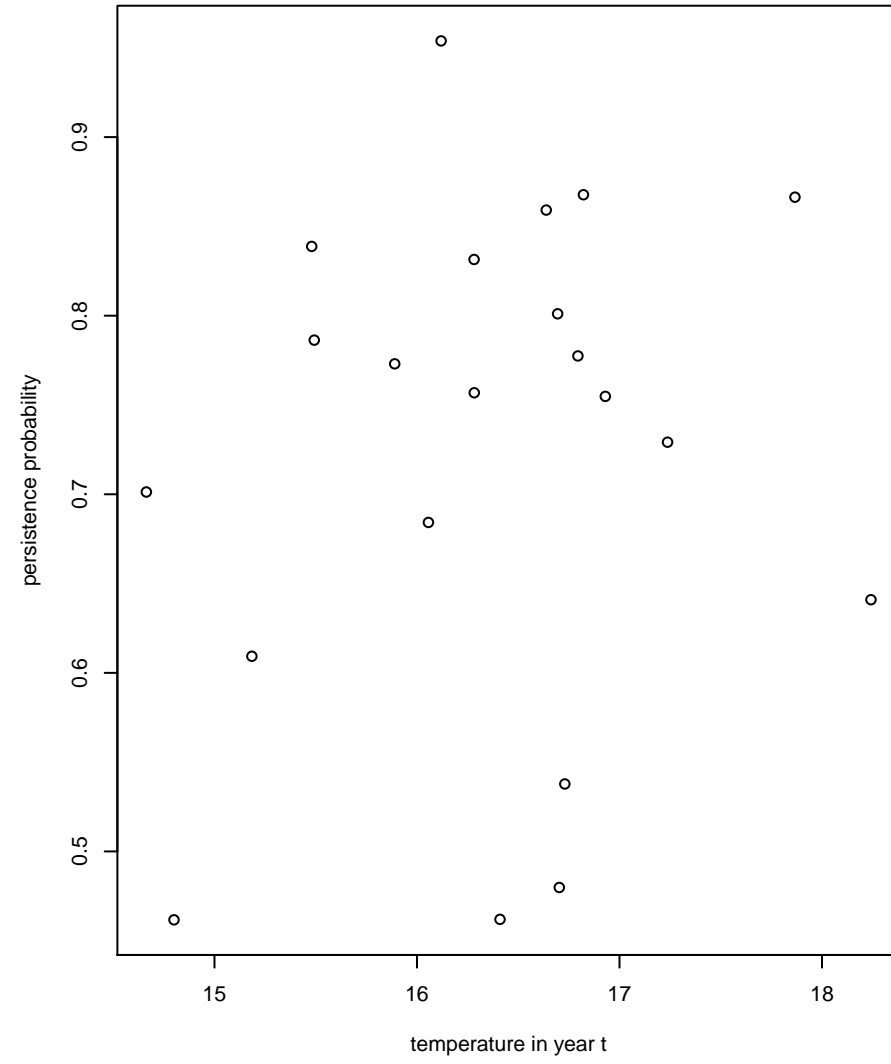

**Meconema meridionale**

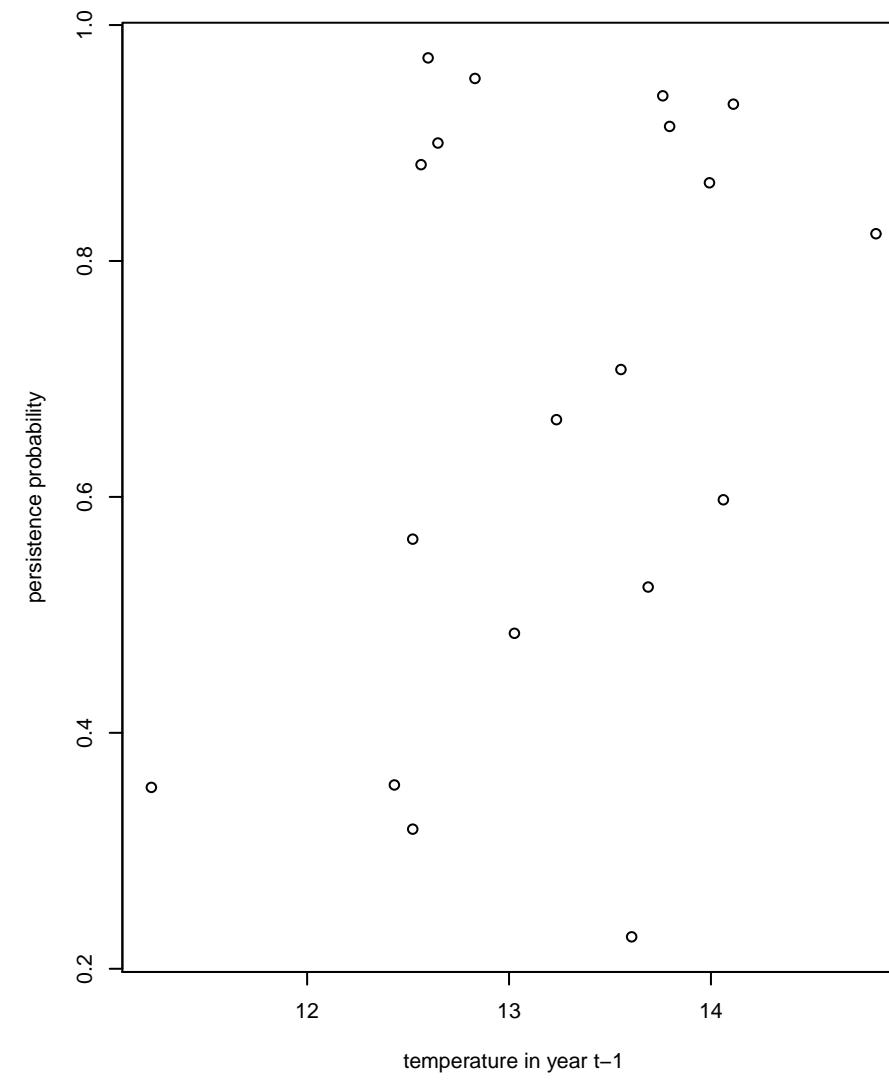

**Meconema meridionale**

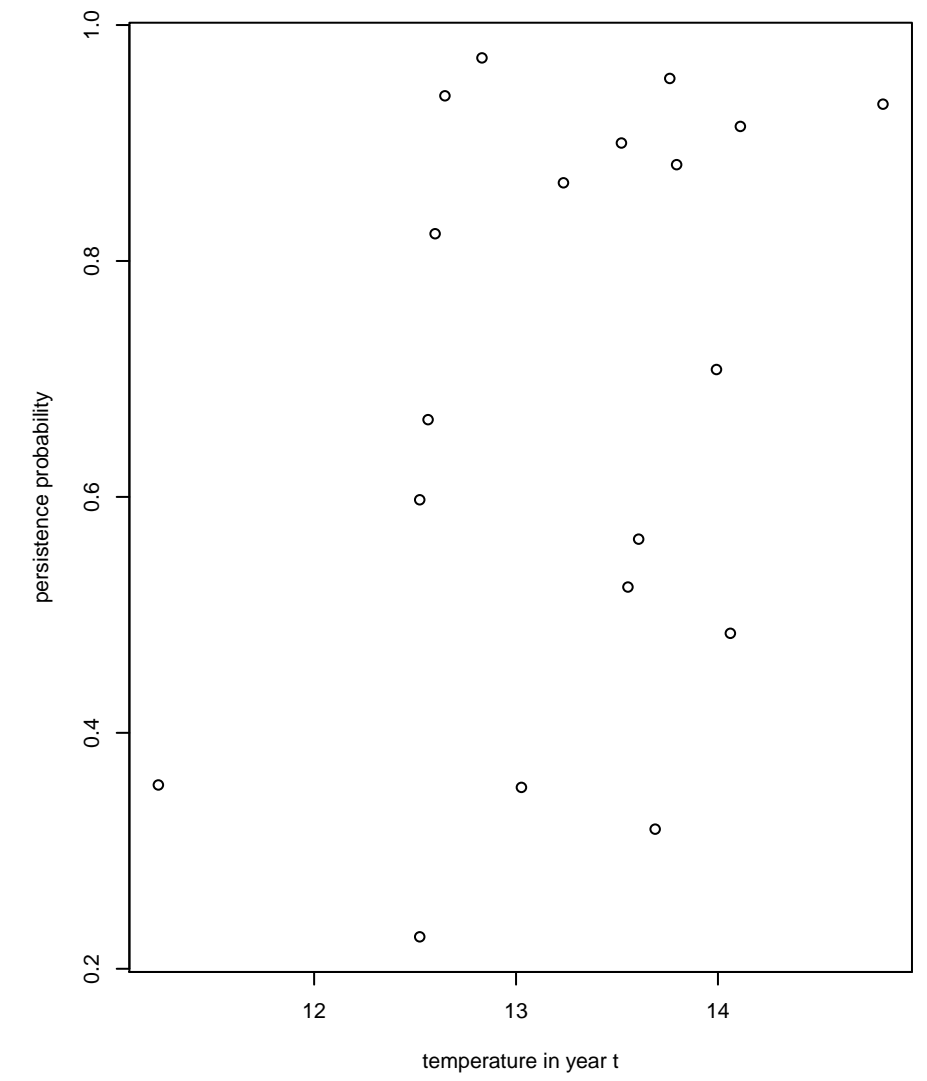

**Meconema thalassinum**

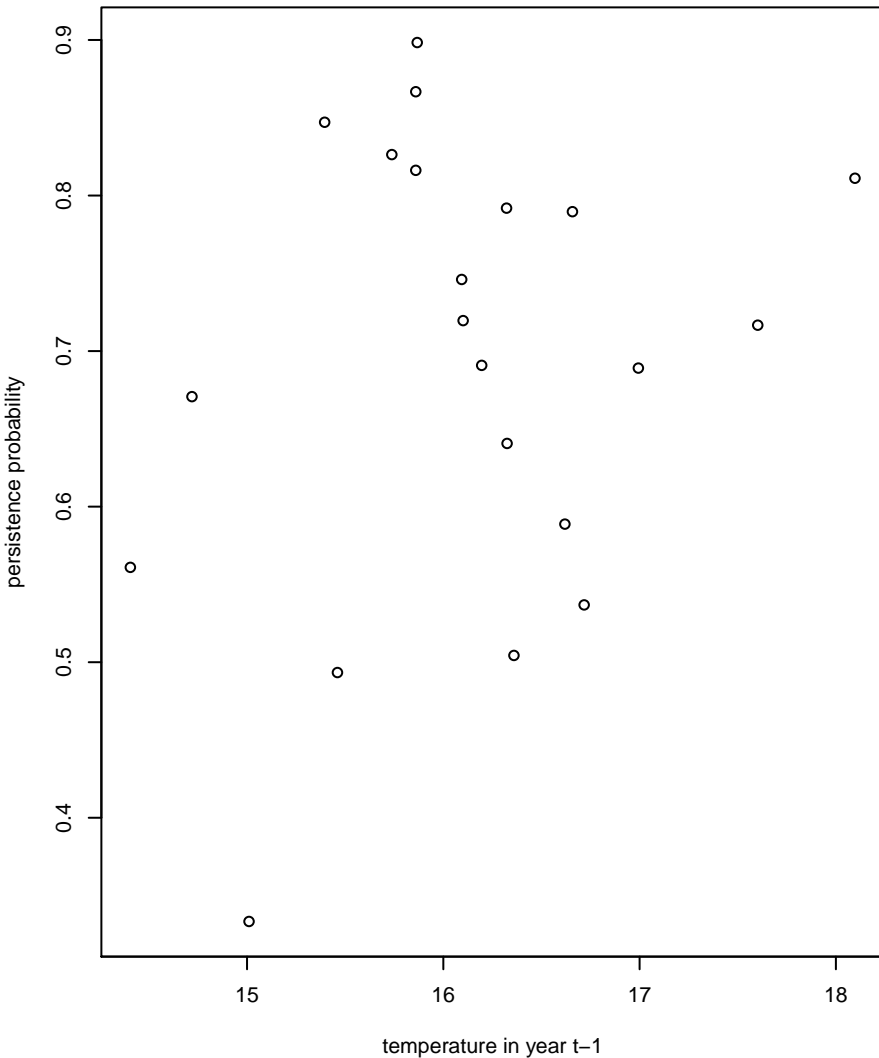

**Meconema thalassinum**

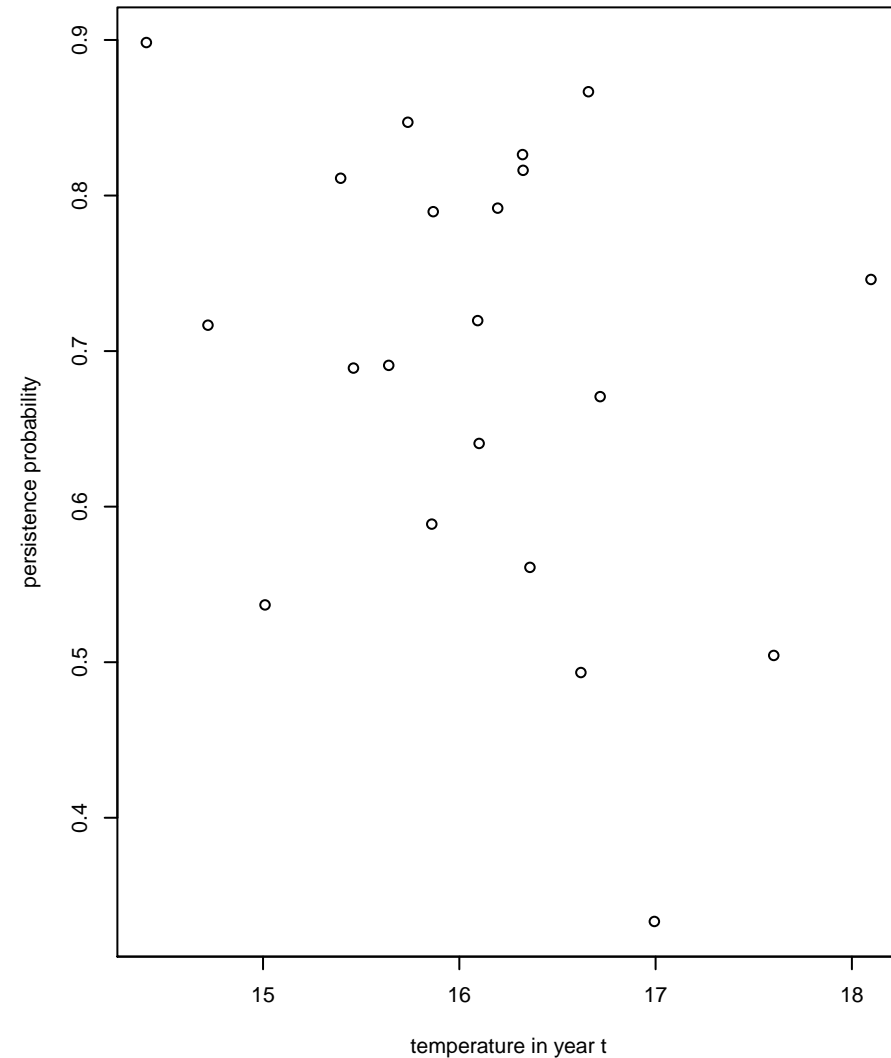

**Metrioptera brachyptera**

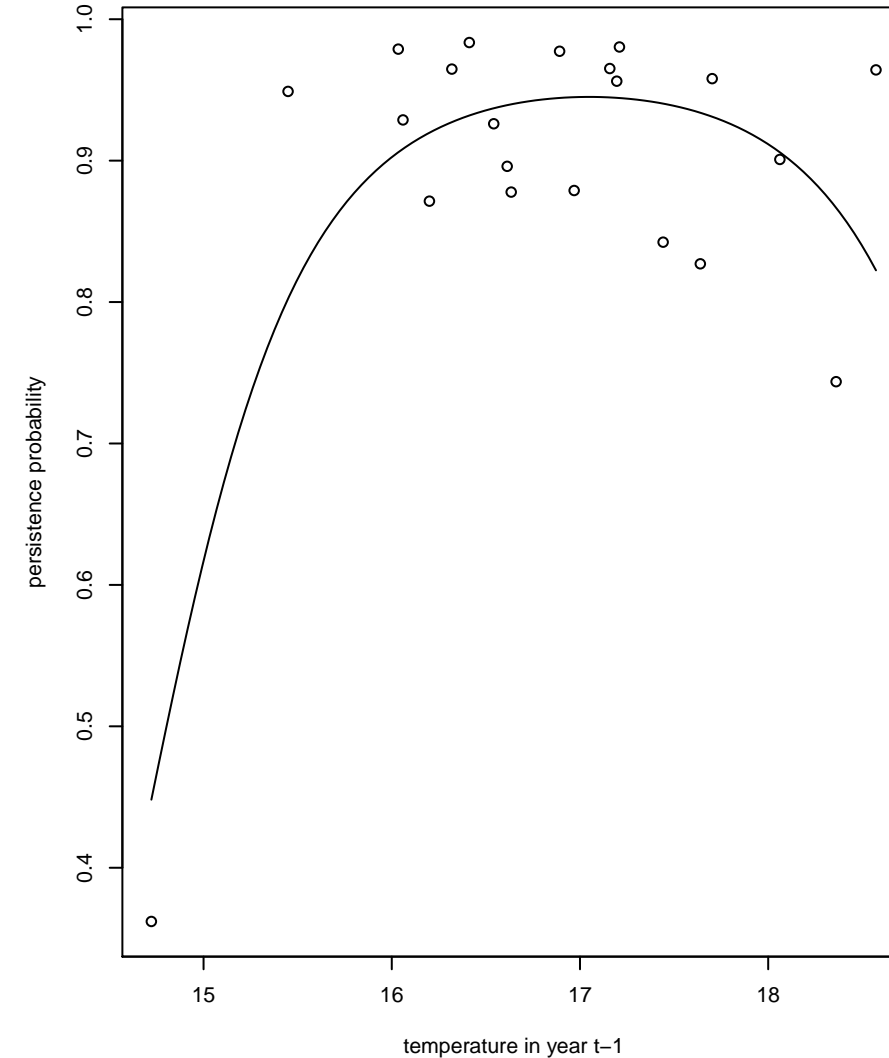

**Metrioptera brachyptera**

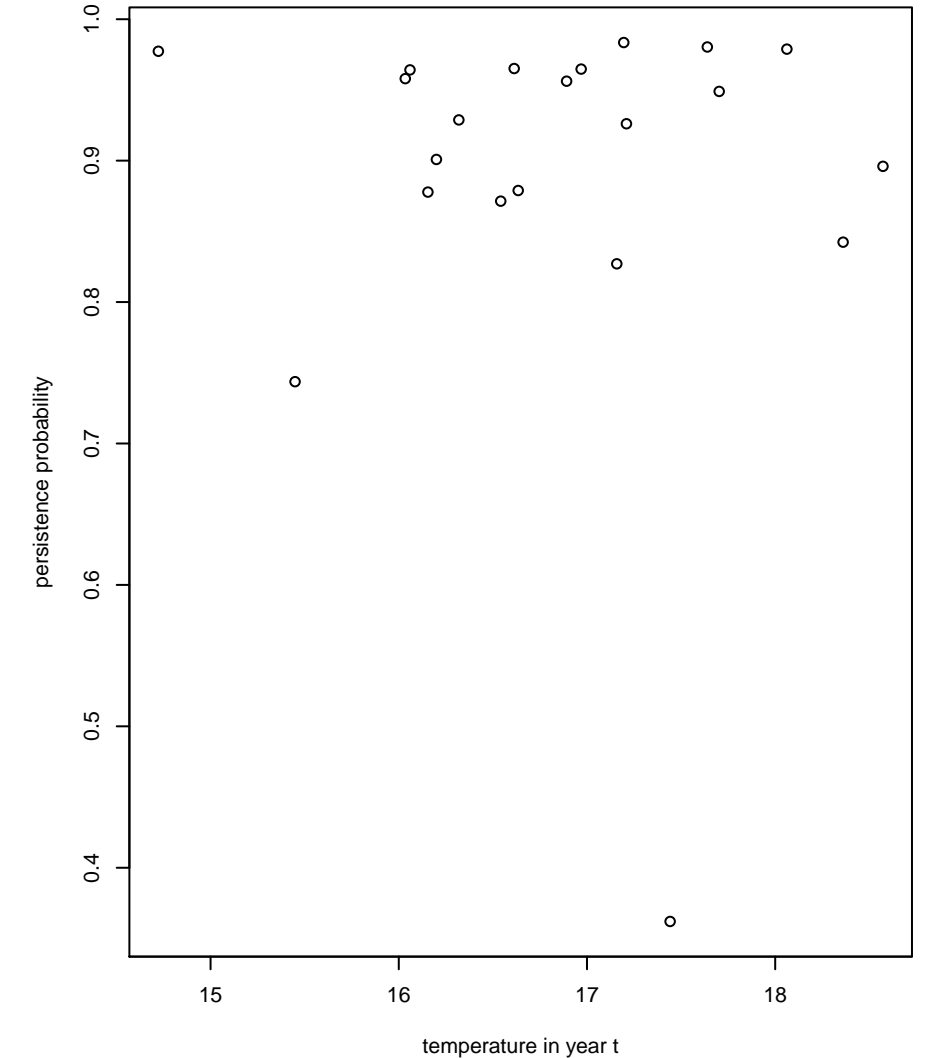



**Metrioptera roeselii**

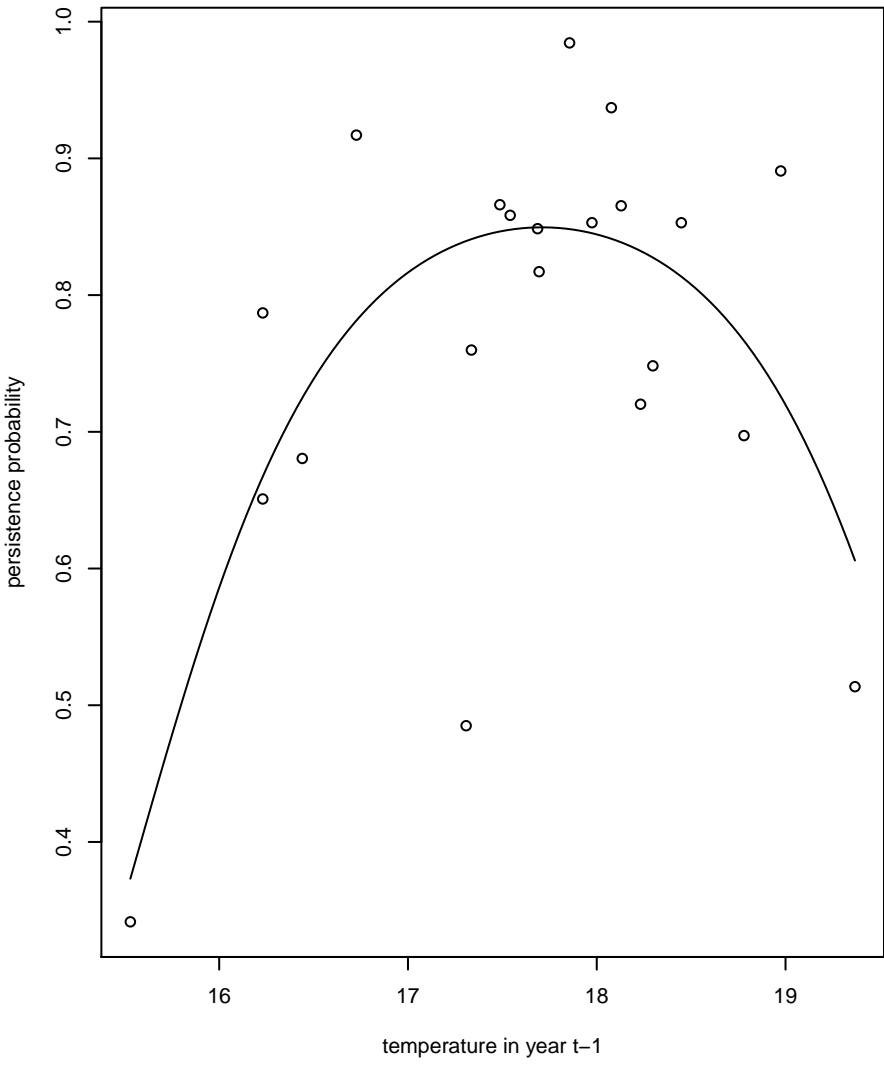

**Metrioptera roeselii**

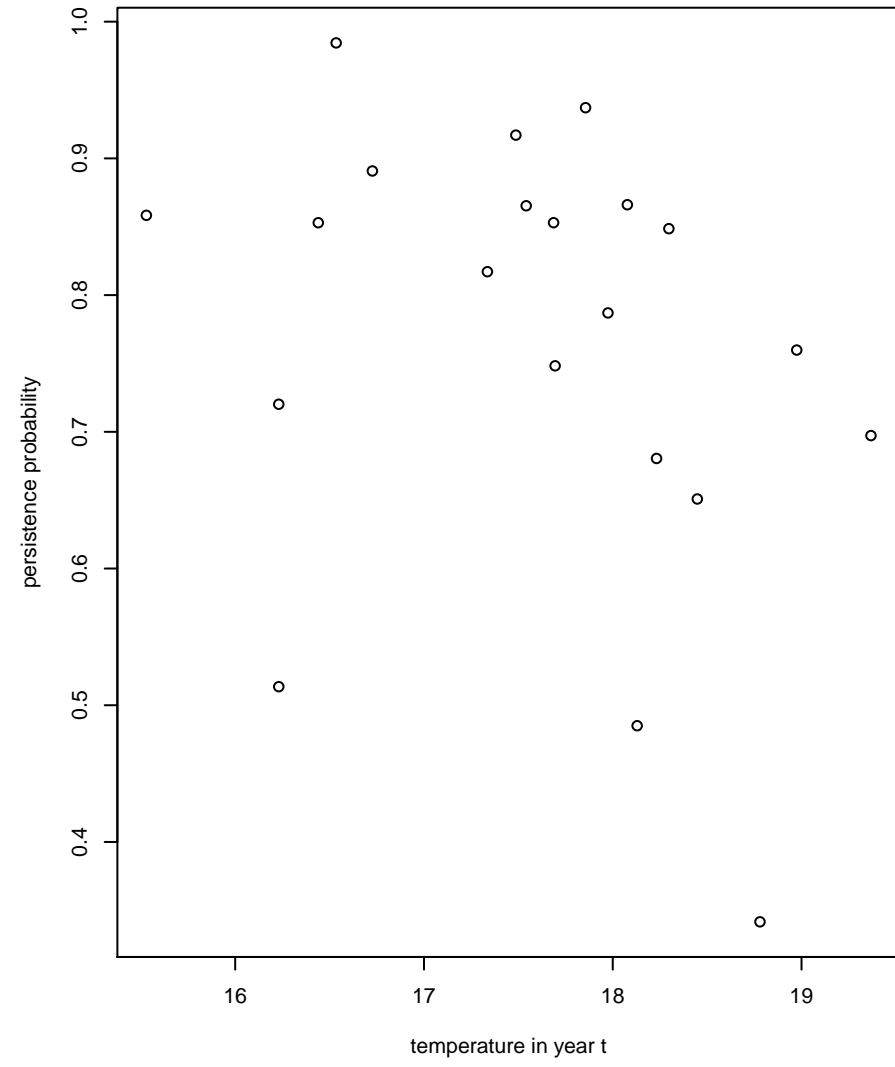

**Myrmeleotettix maculatus**

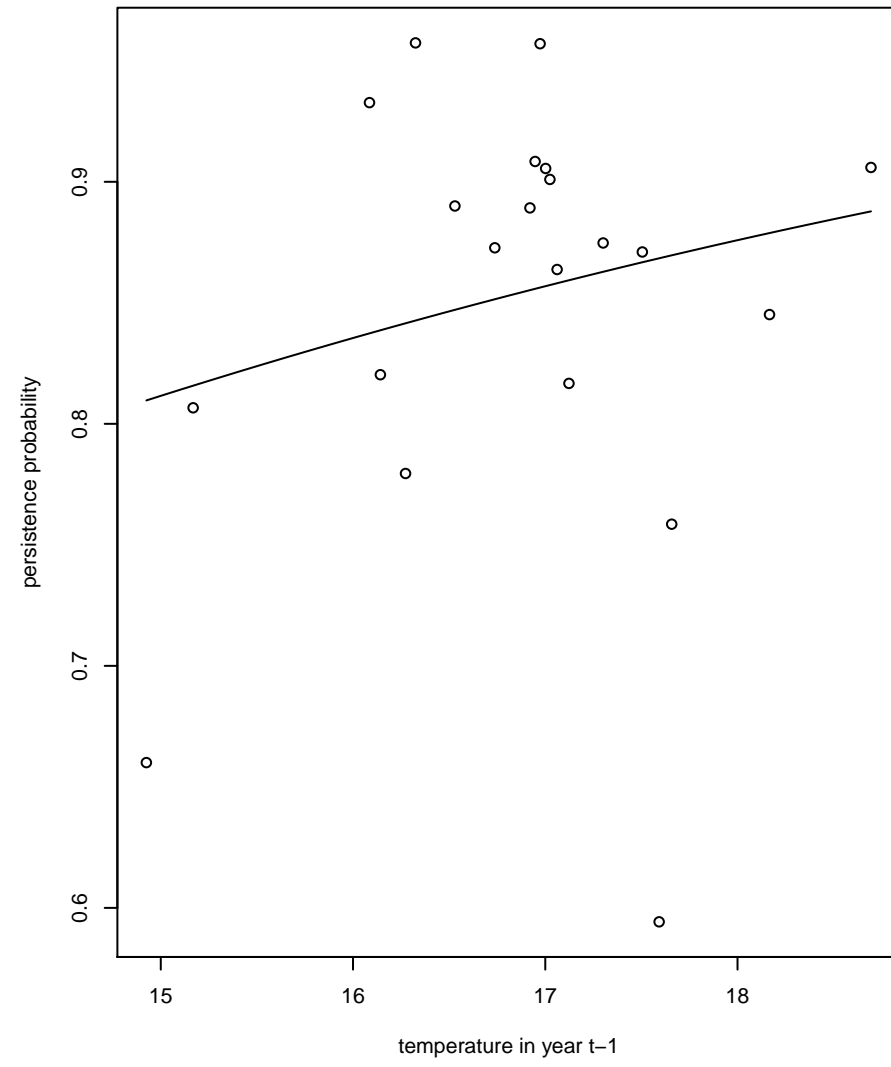

**Myrmeleotettix maculatus**

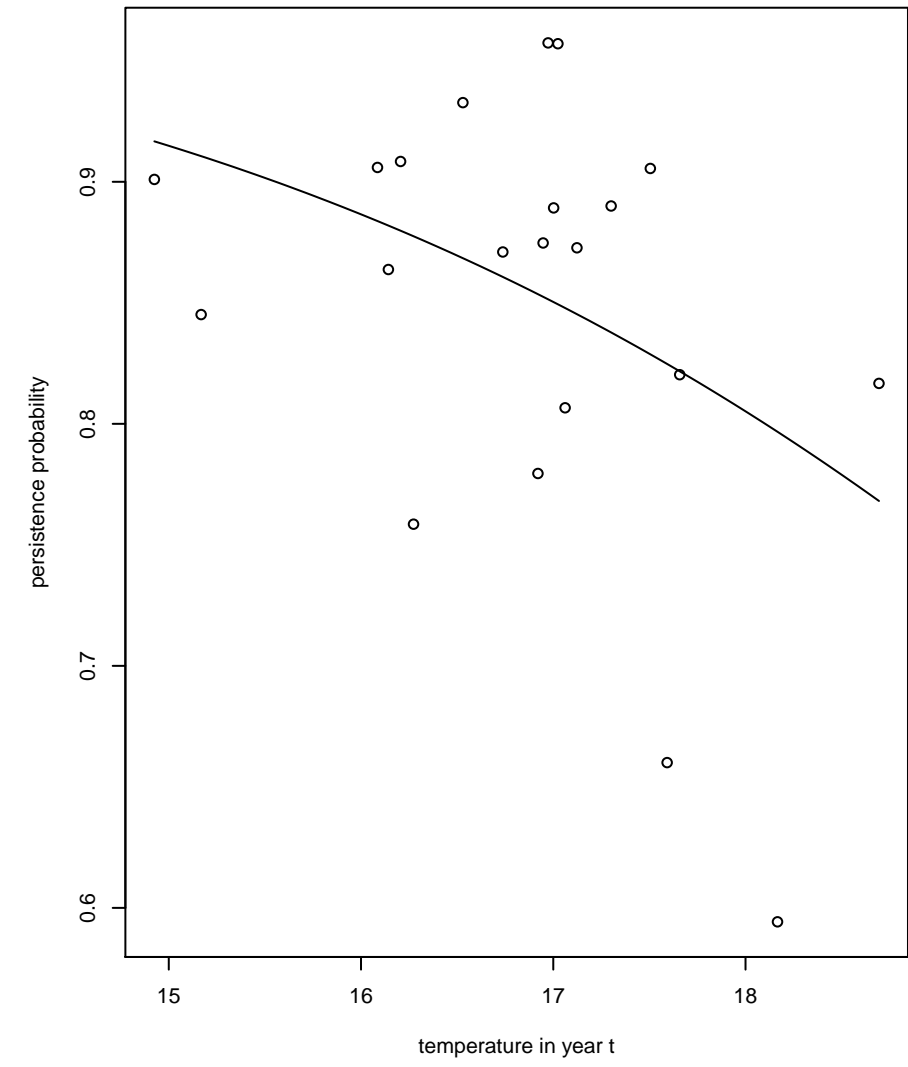

**Nemobius sylvestris**

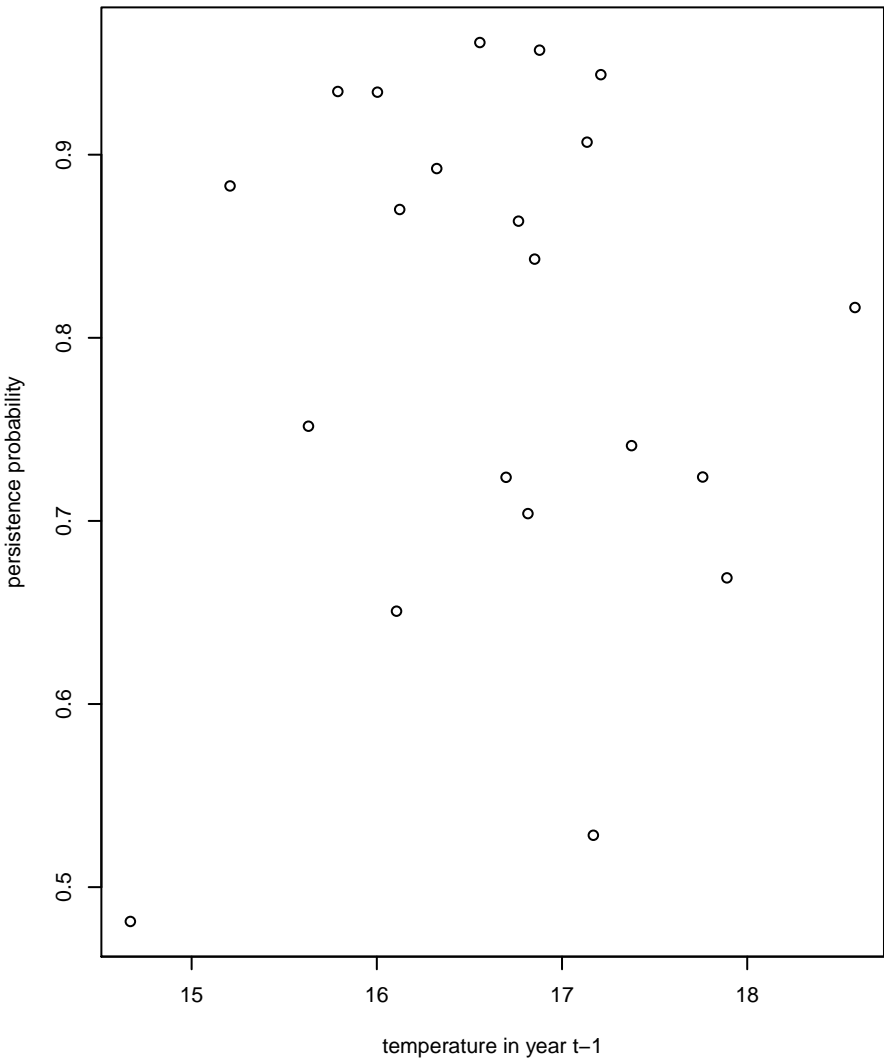

**Nemobius sylvestris**

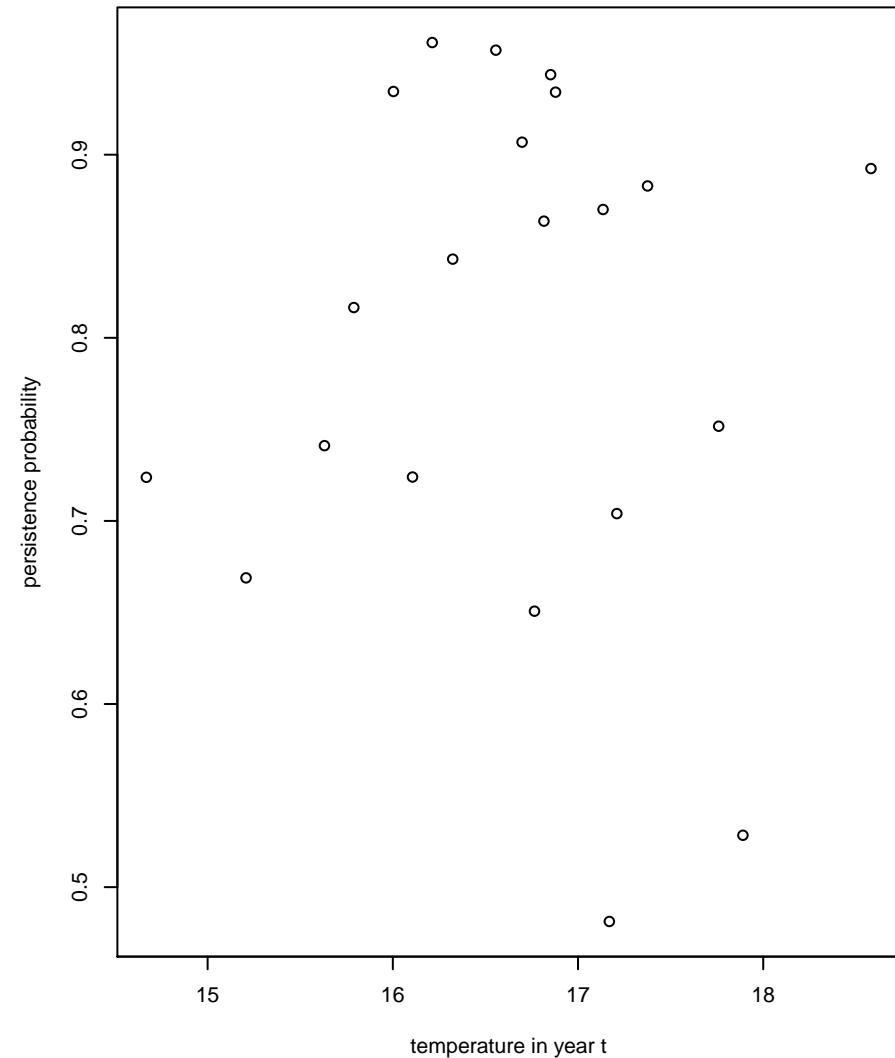

**Oecanthus pellucens**

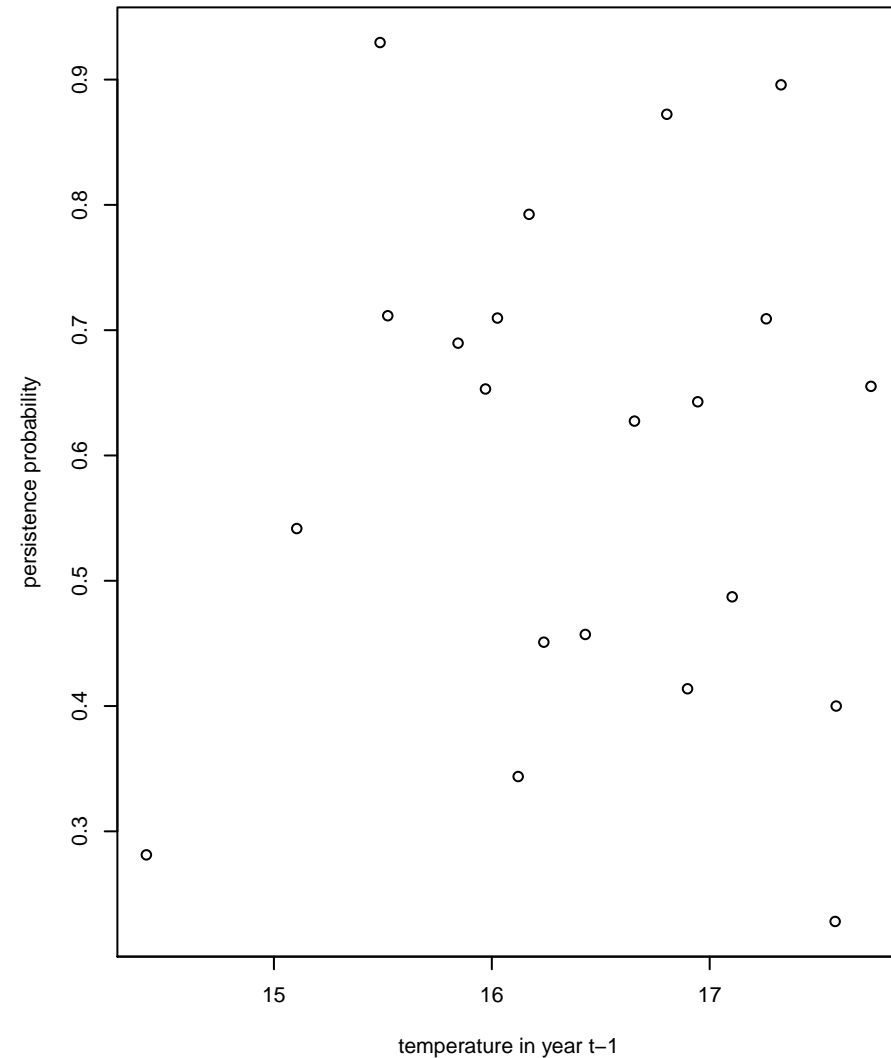

**Oecanthus pellucens**

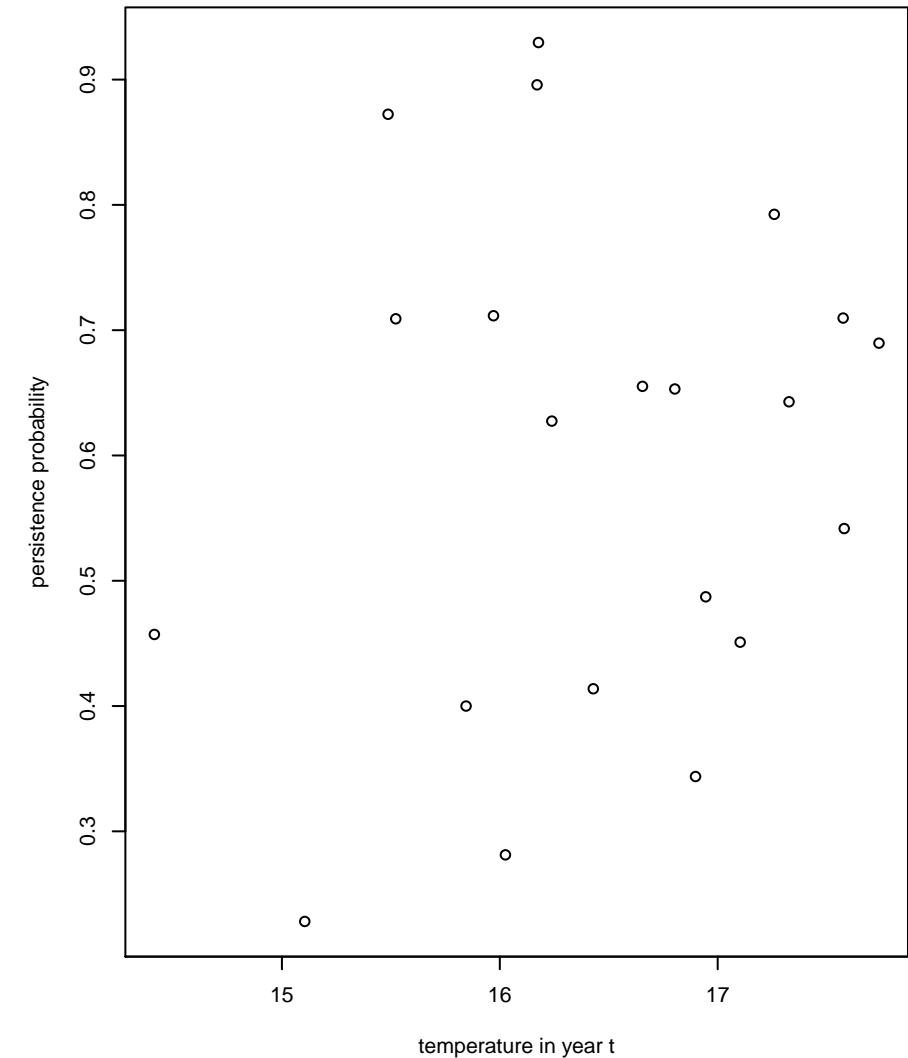

**Oedipoda caerulescens**

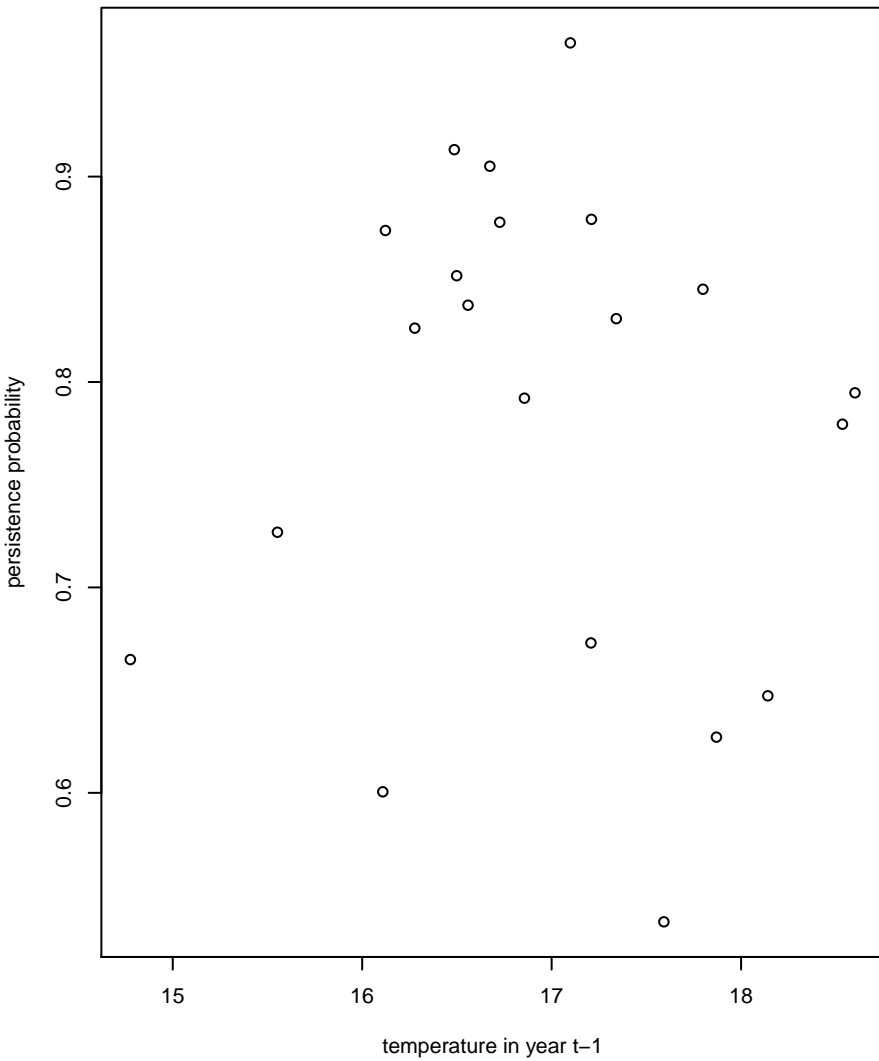

**Oedipoda caerulescens**

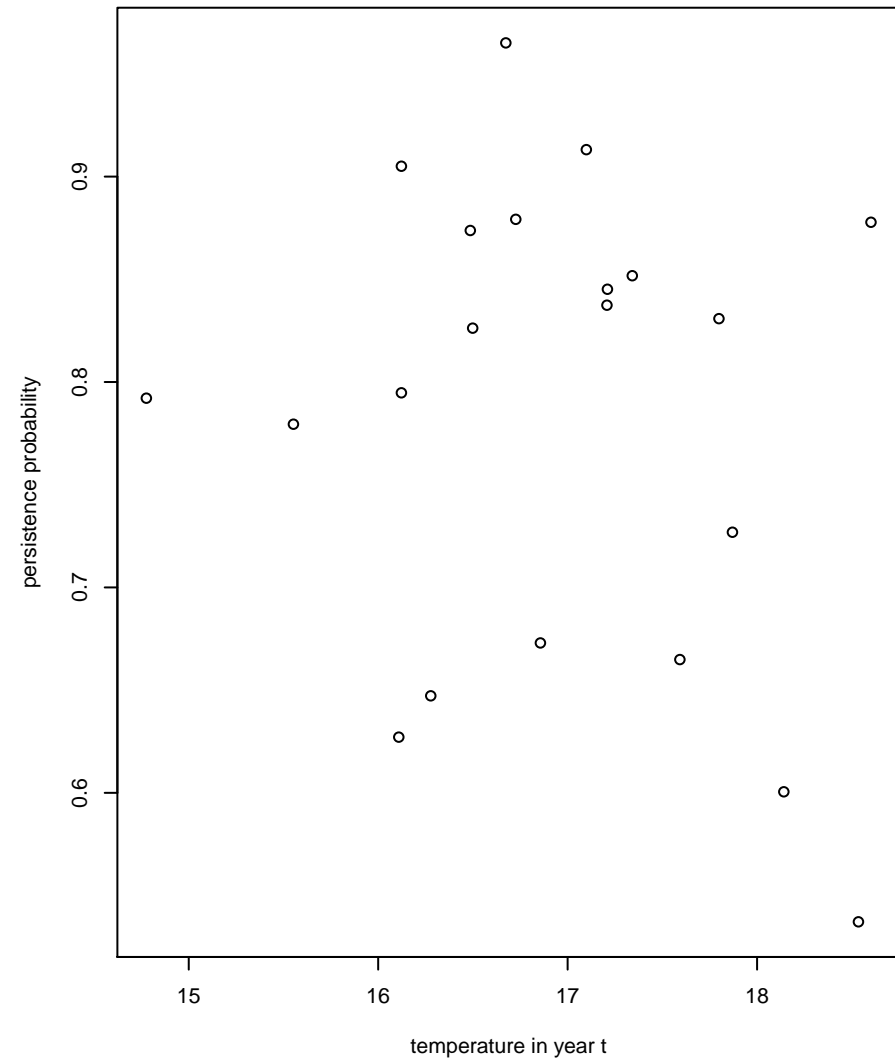

**Omocestus rufipes**

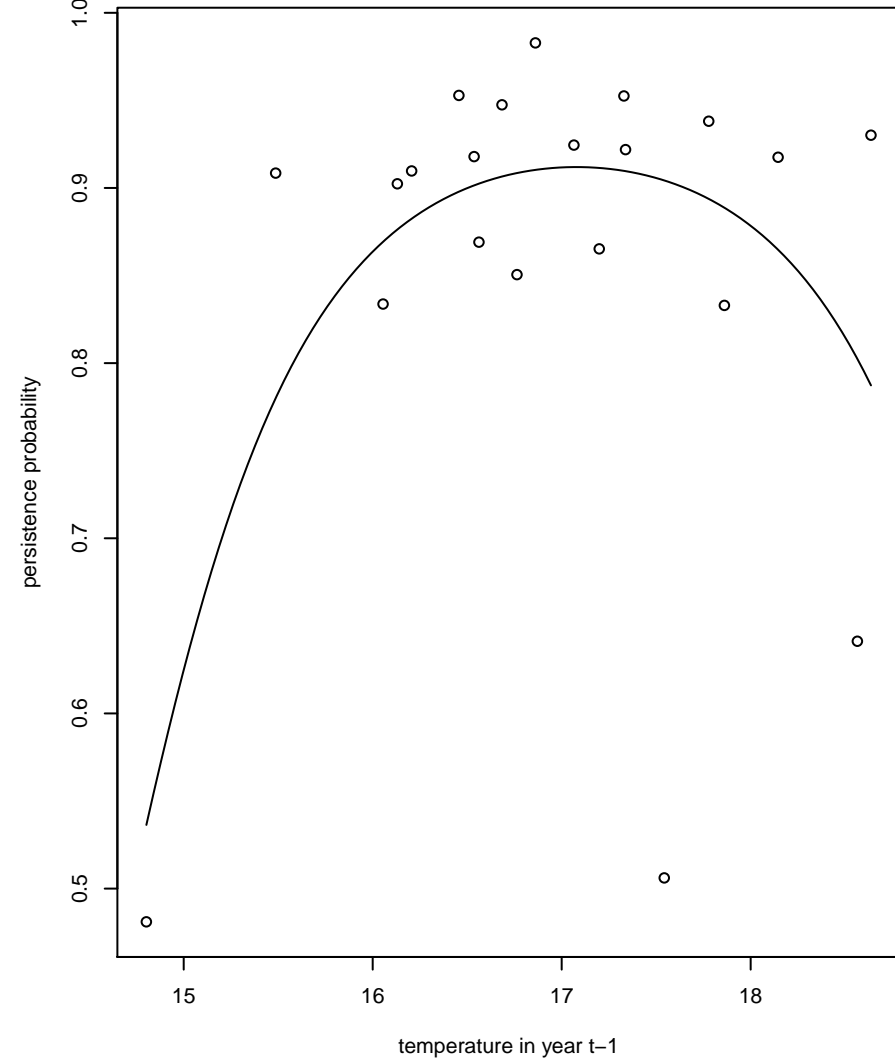

**Omocestus rufipes**

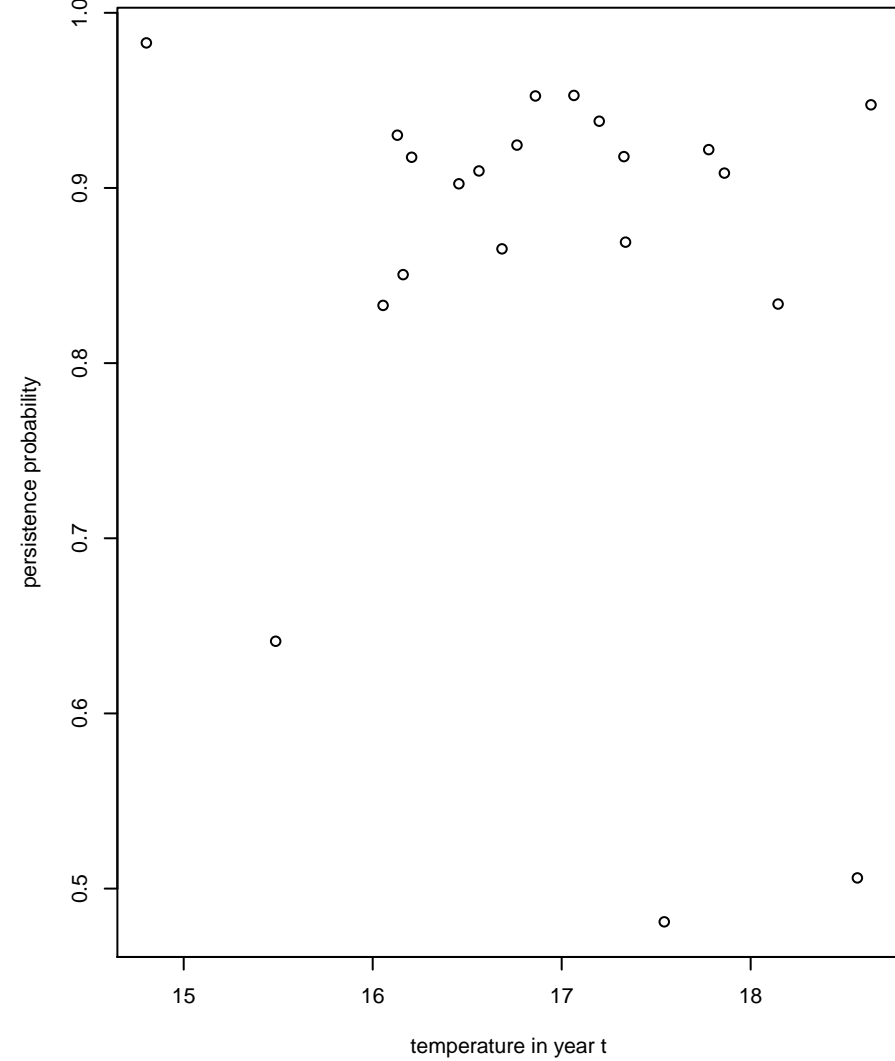

**Omocestus viridulus**

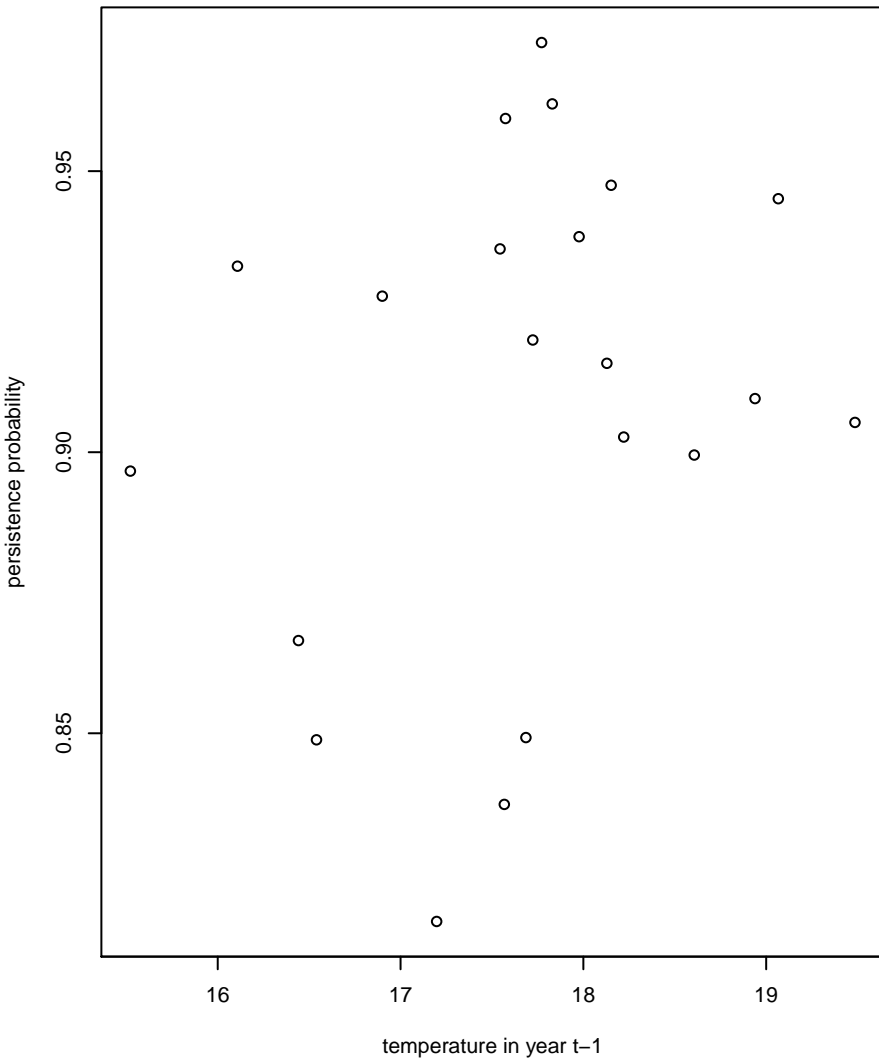

**Omocestus viridulus**

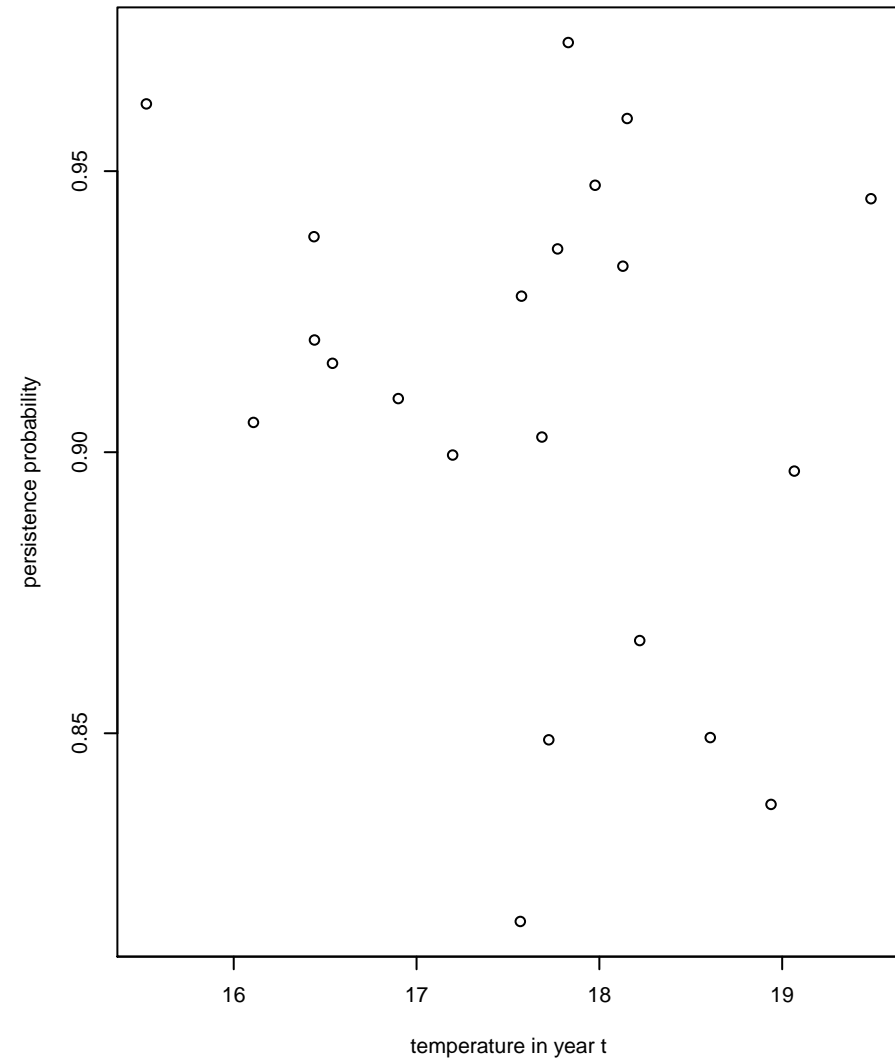

**Phaneroptera falcata**

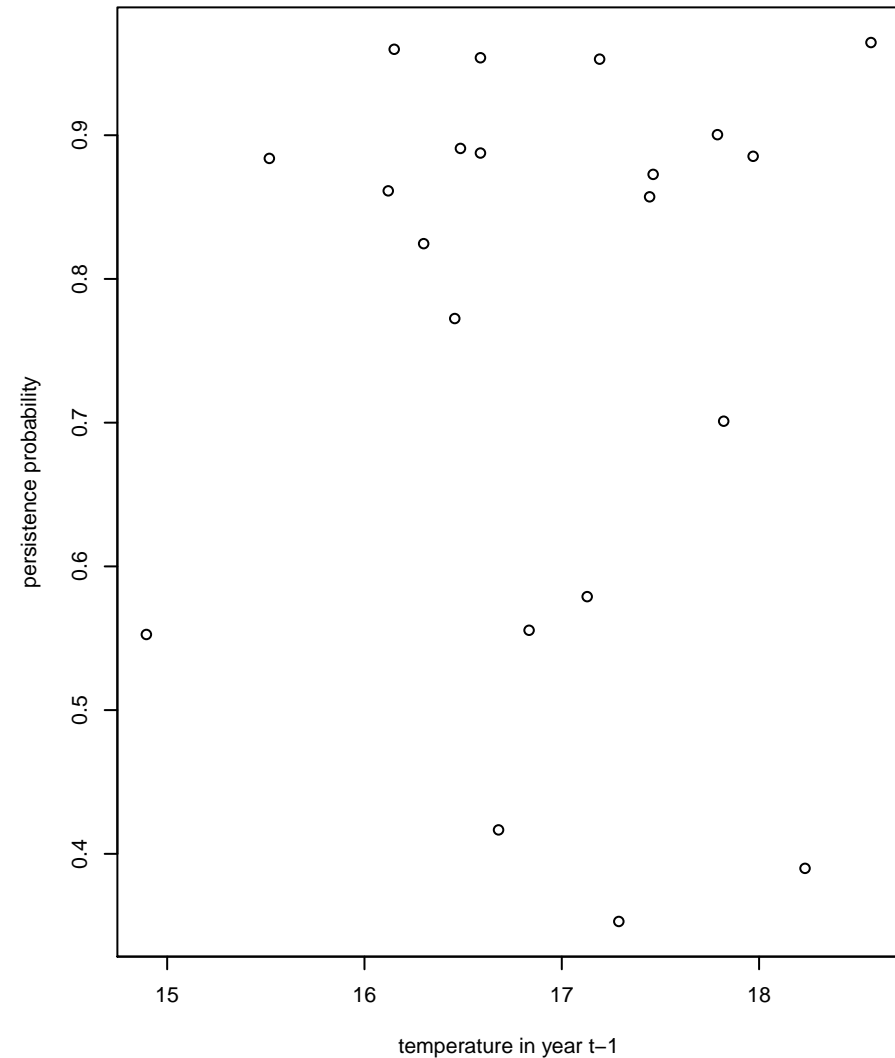

**Phaneroptera falcata**

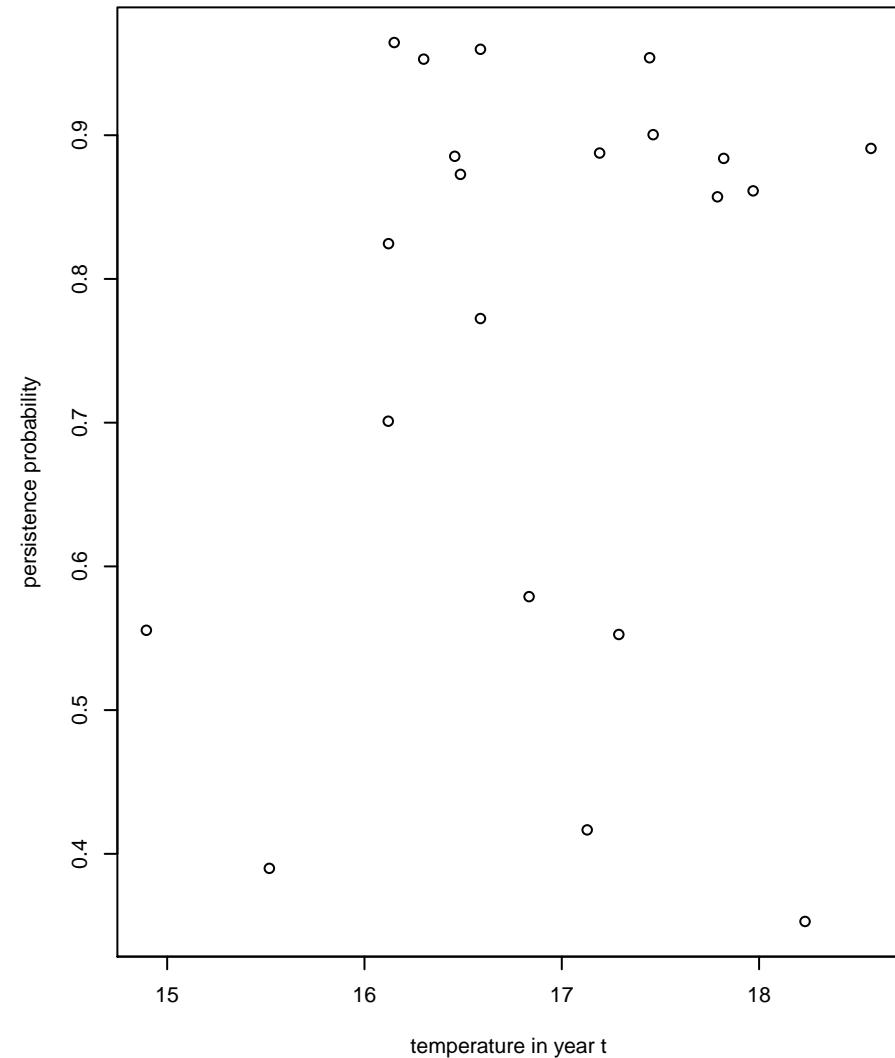

**Pholidoptera griseoptera**

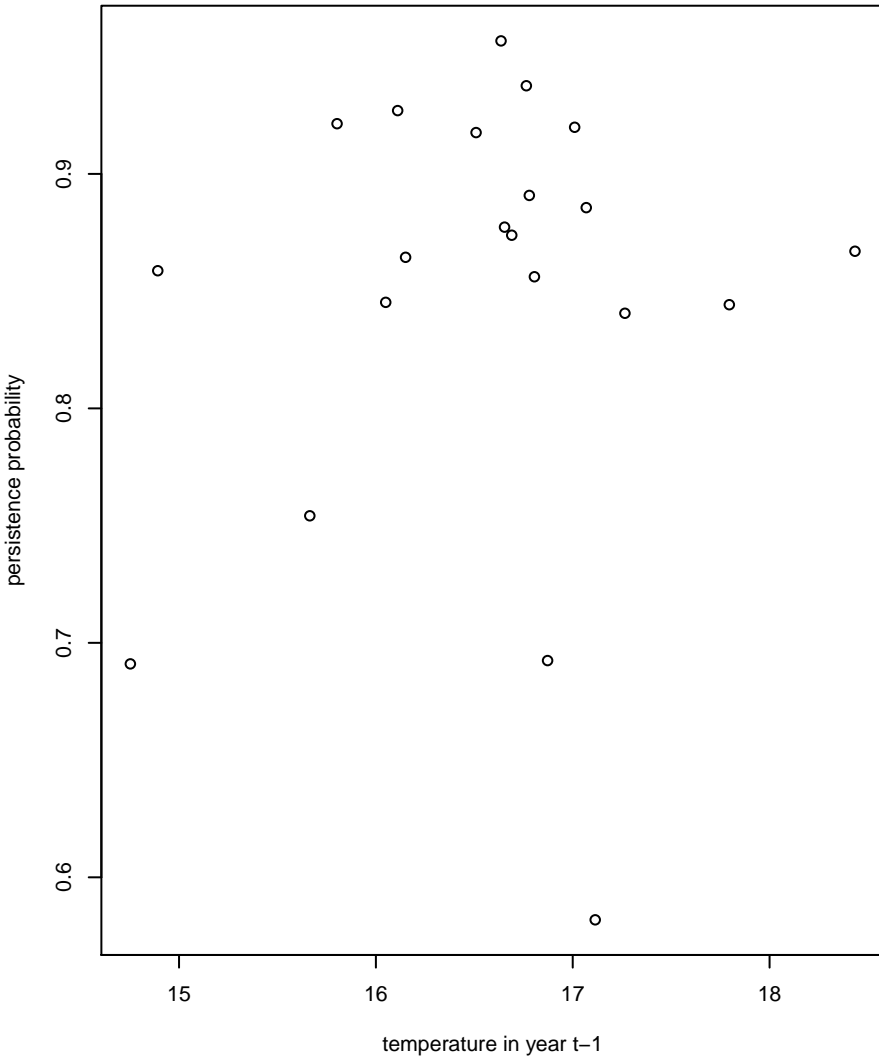

**Pholidoptera griseoptera**

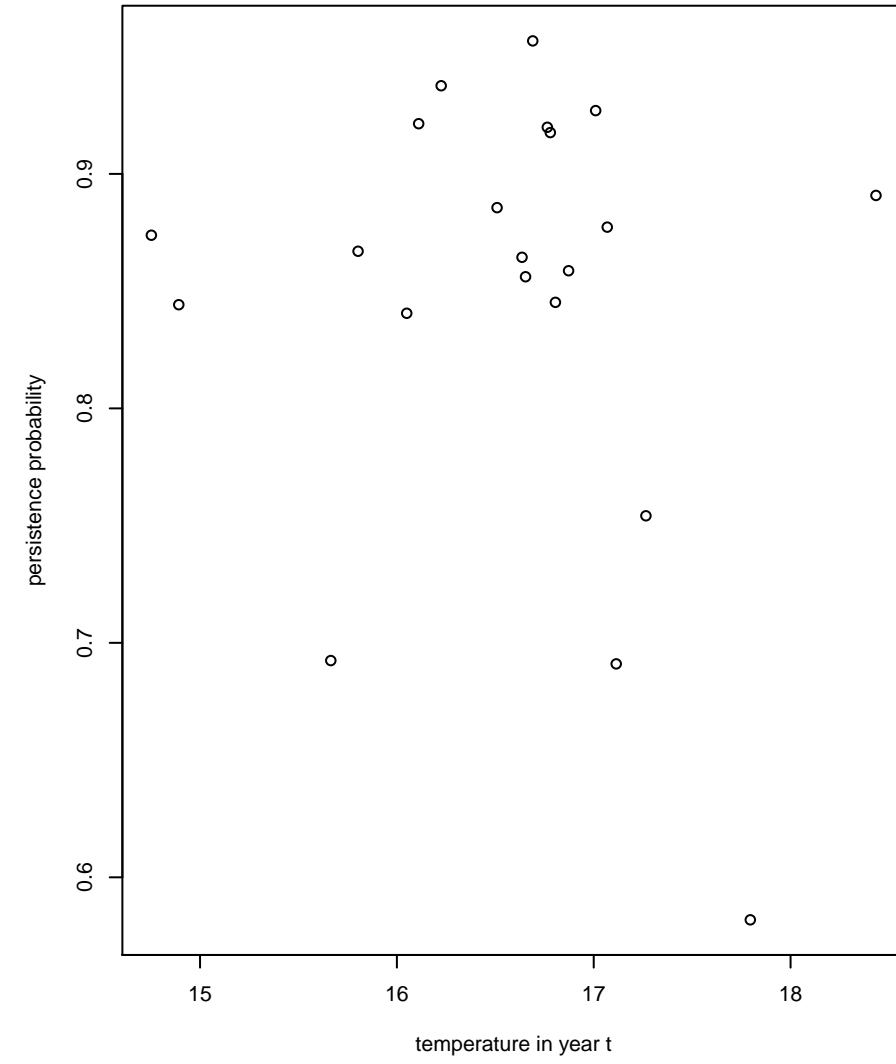

**Platycleis albopunctata**

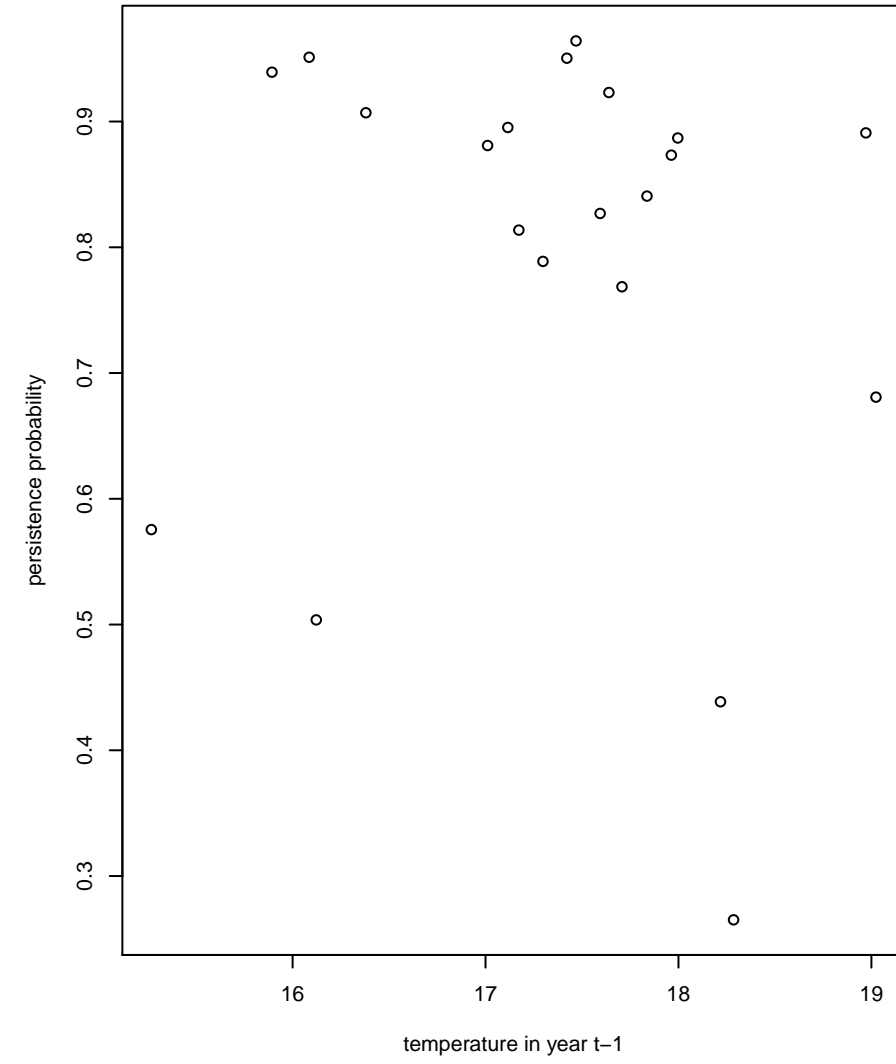

**Platycleis albopunctata**

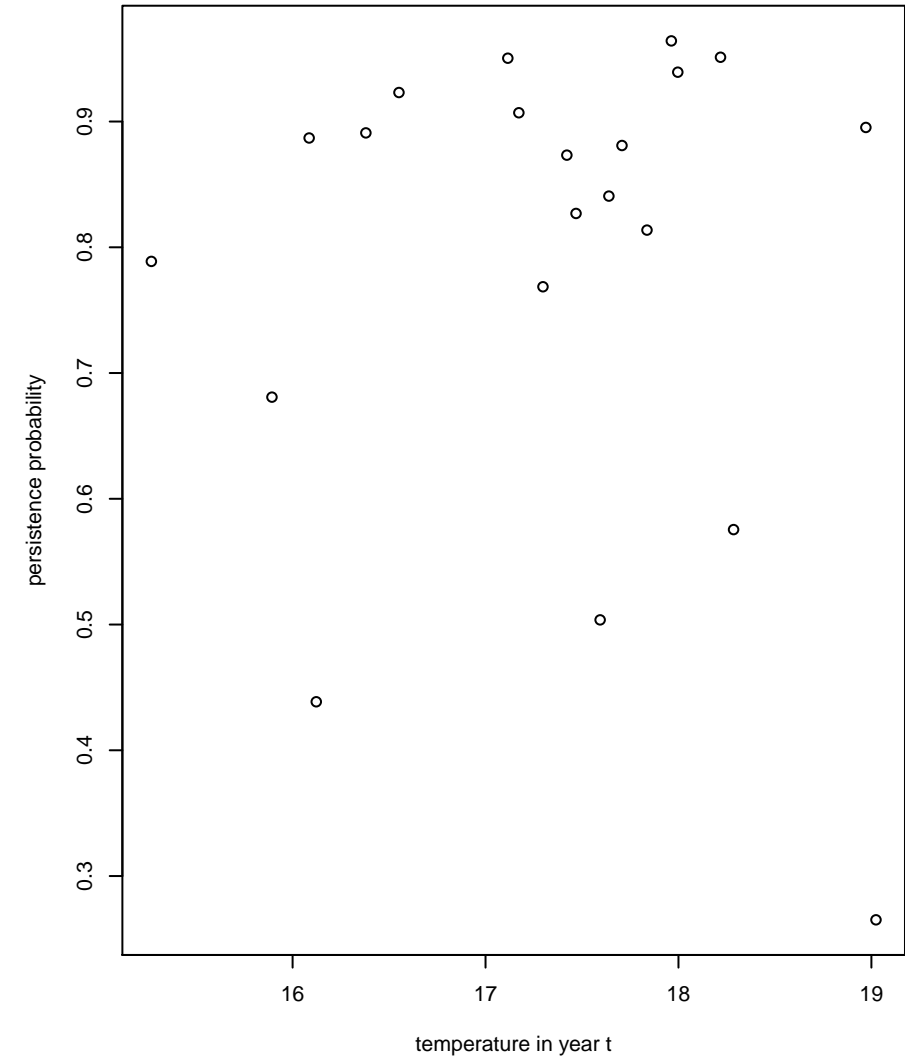

**Stenobothrus lineatus**

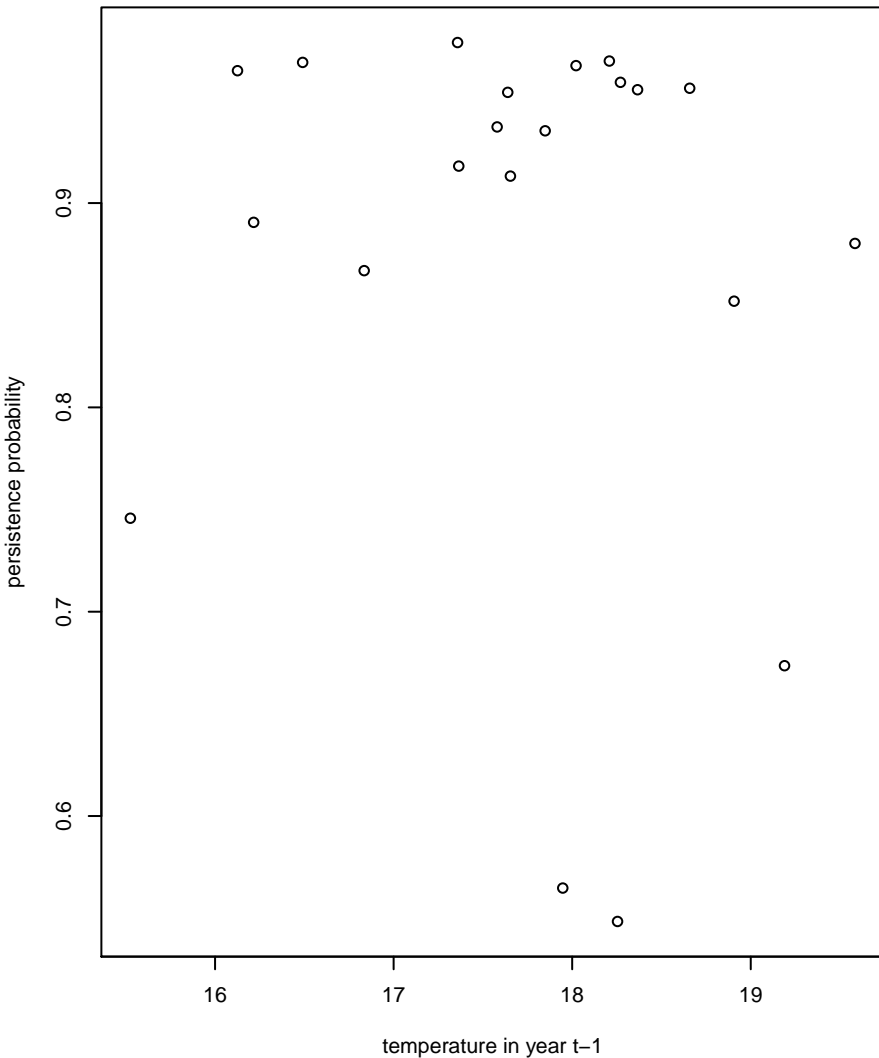

**Stenobothrus lineatus**

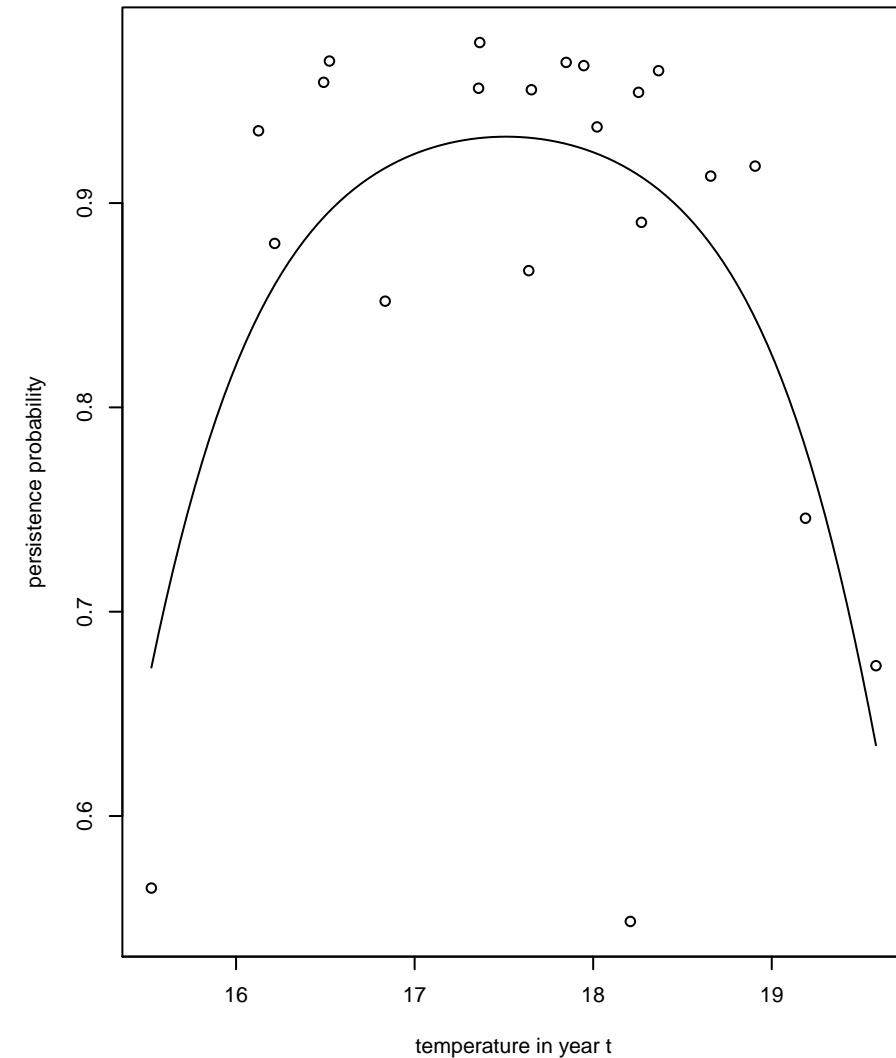

**Stenobothrus stigmaticus**

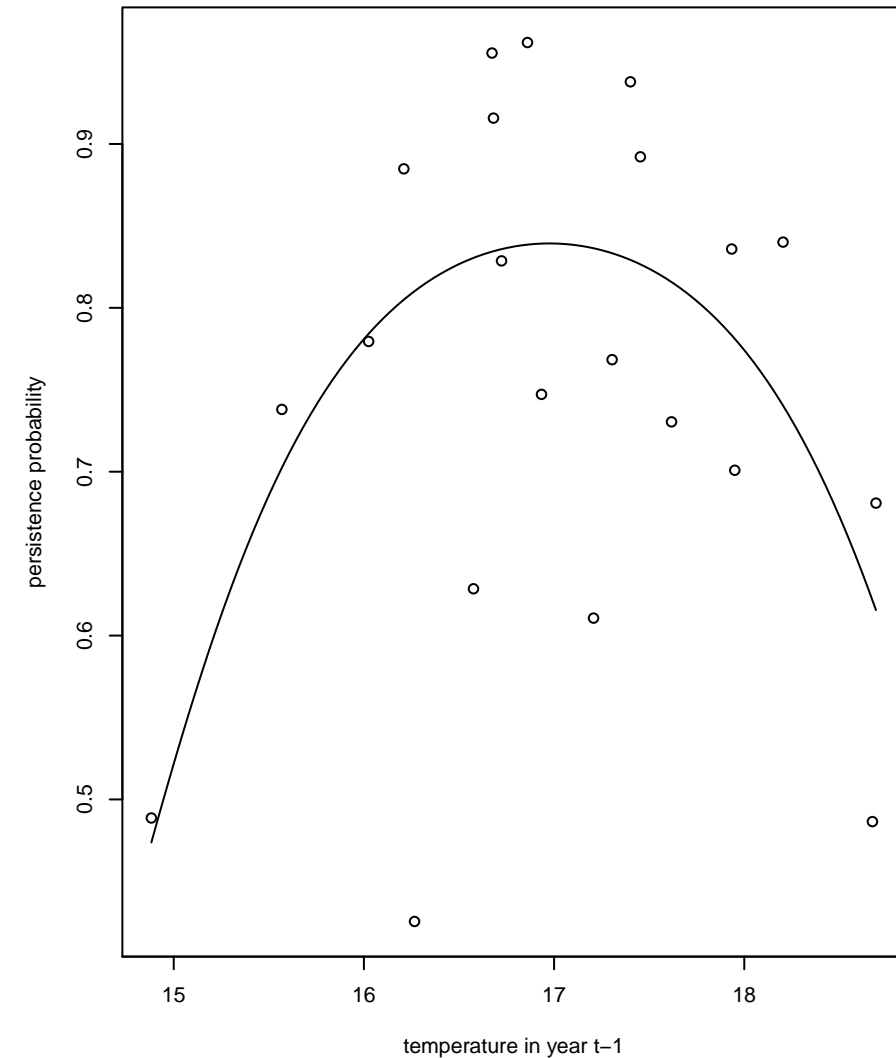

**Stenobothrus stigmaticus**

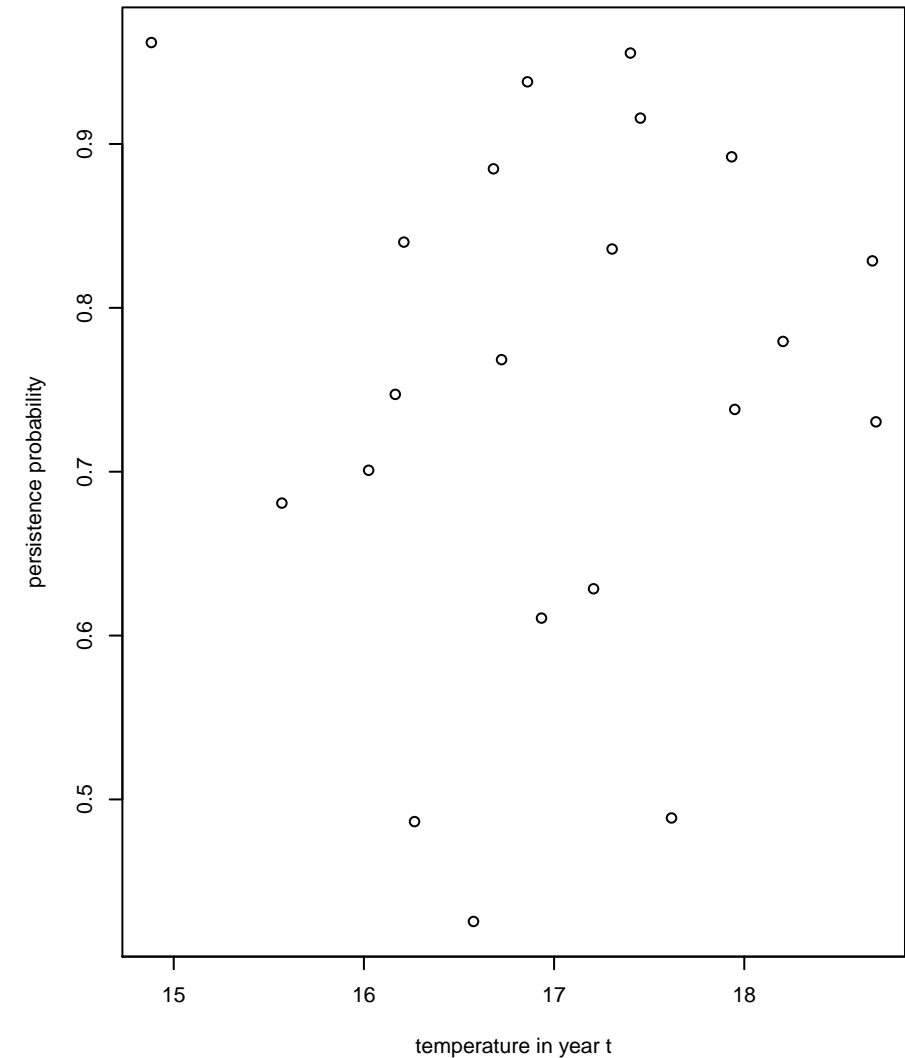

**Stethophyma grossum**

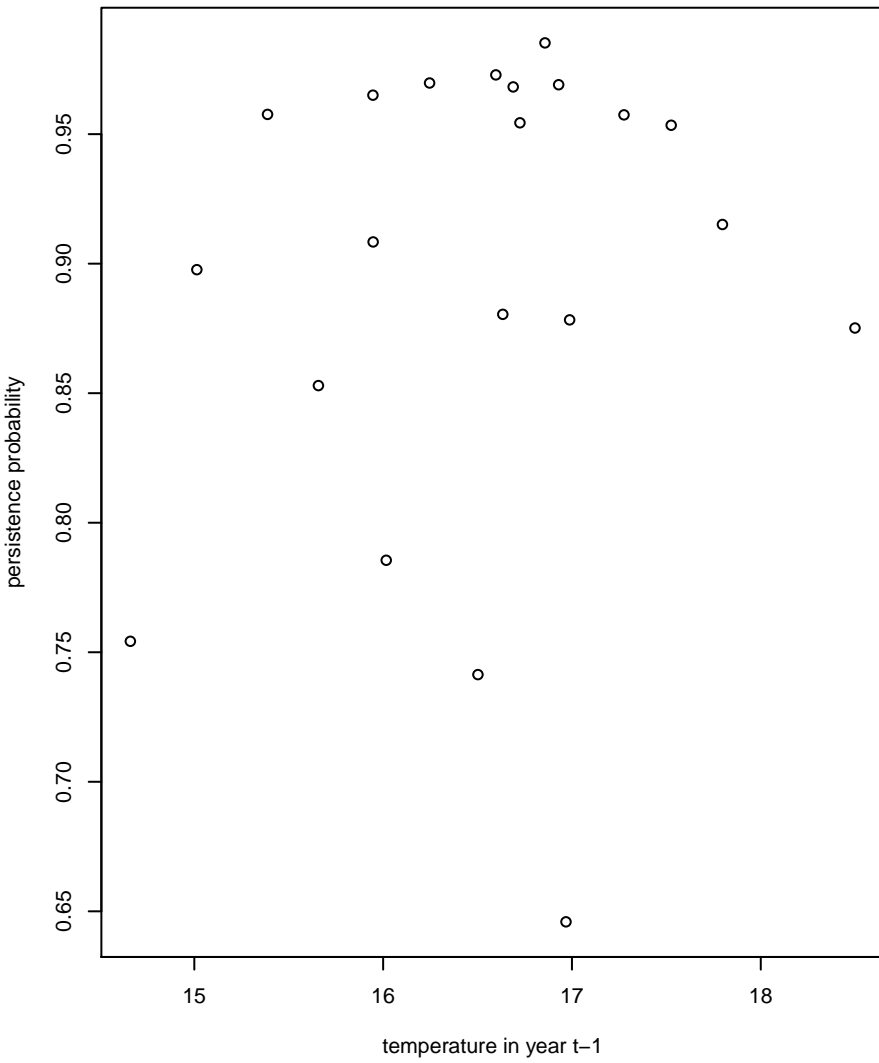

**Stethophyma grossum**

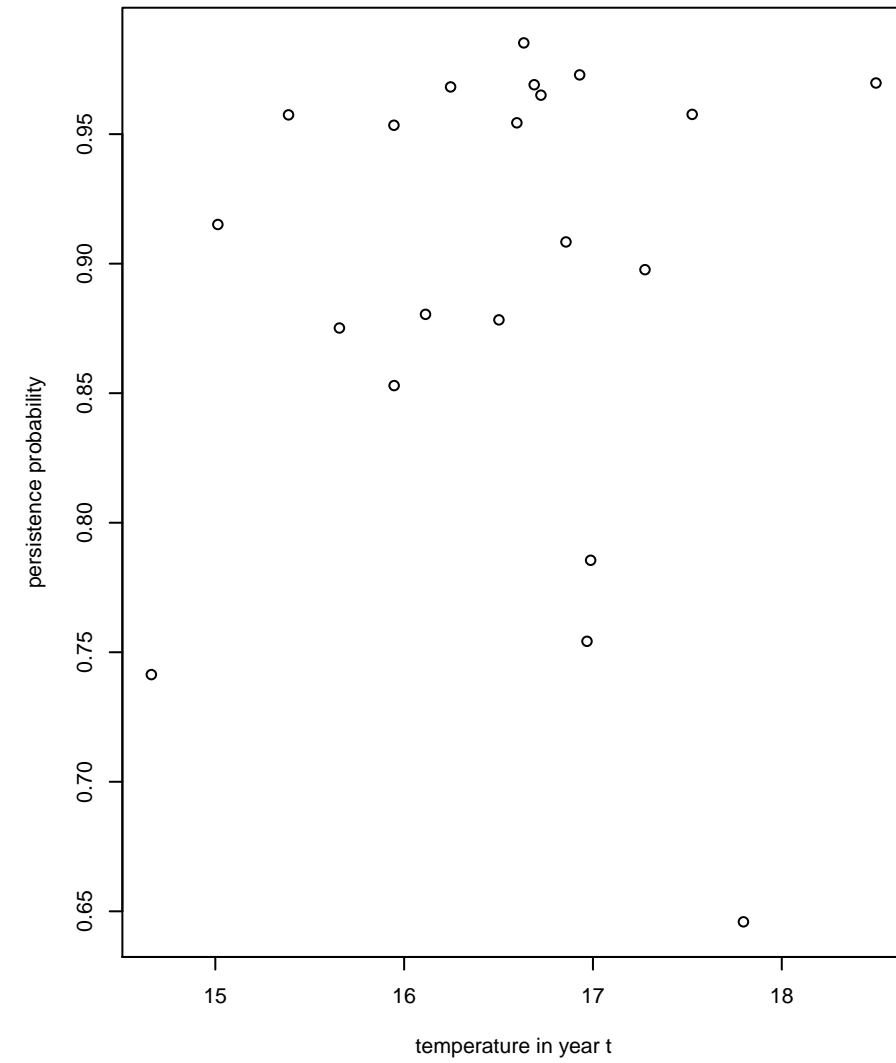

**Tetrix ceperoi**

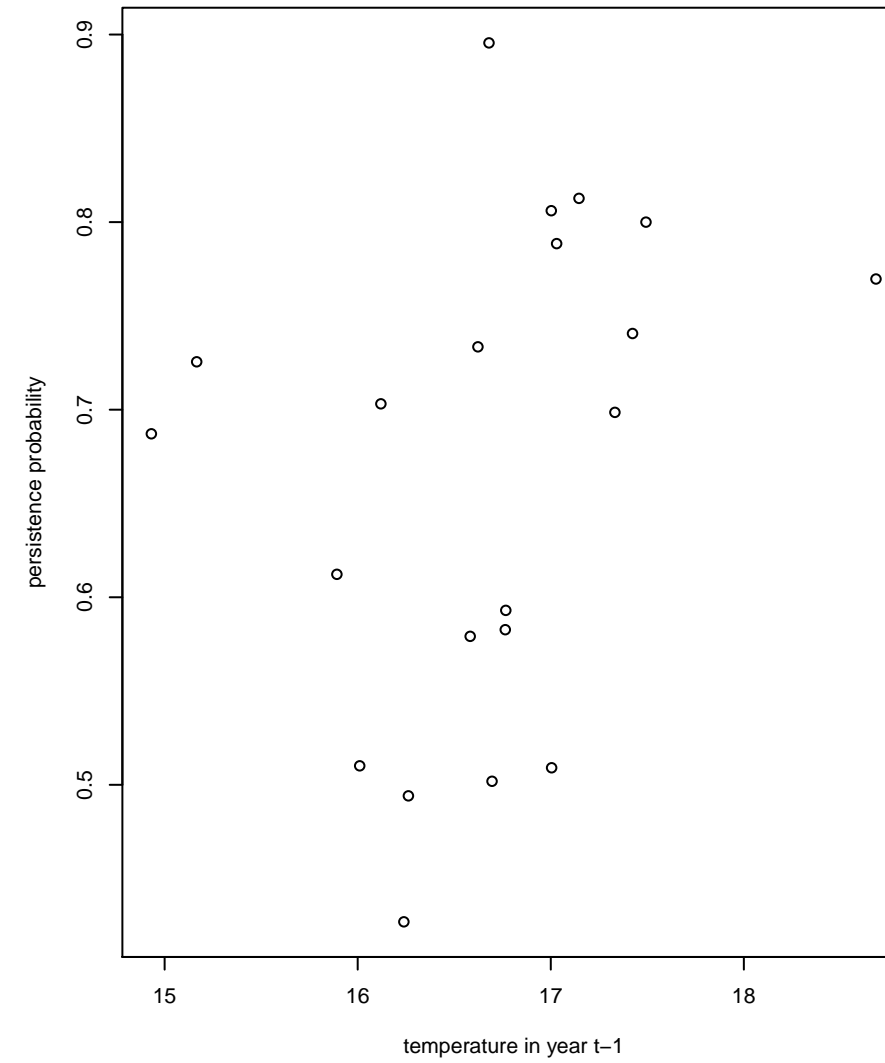

**Tetrix ceperoi**

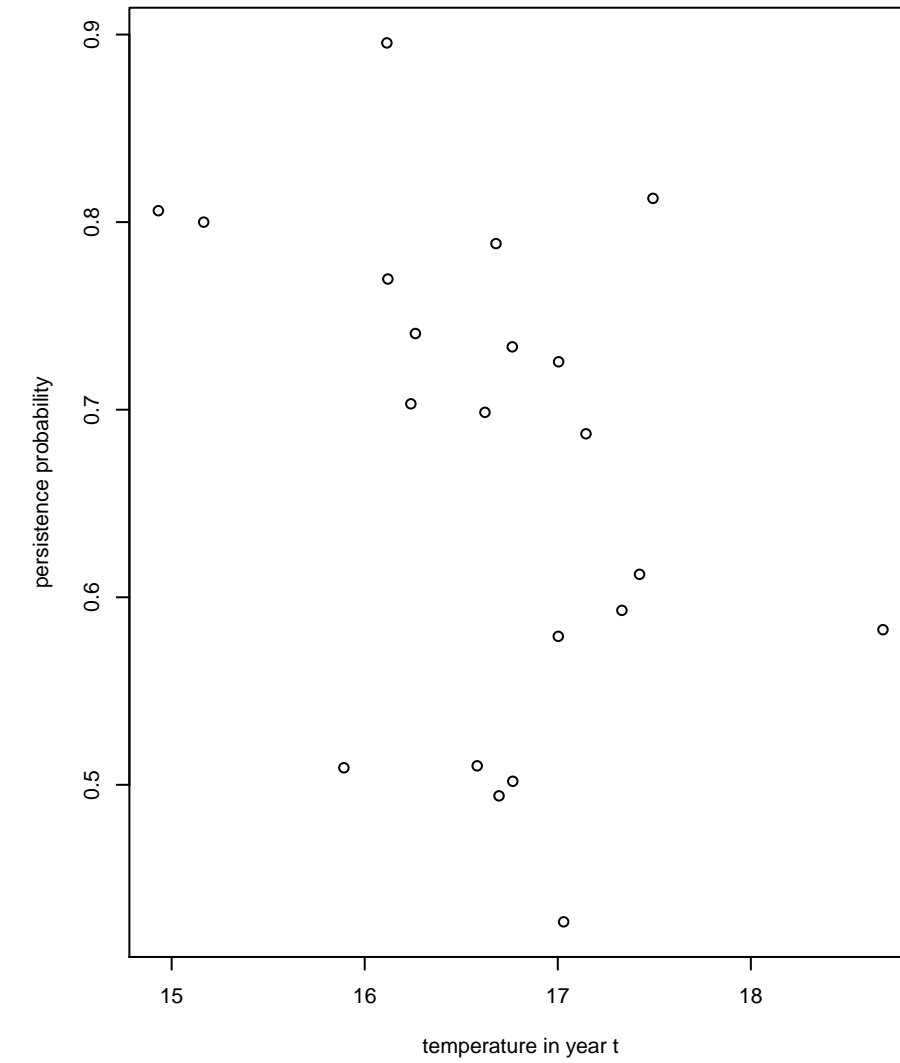

**Tetrix subulata**

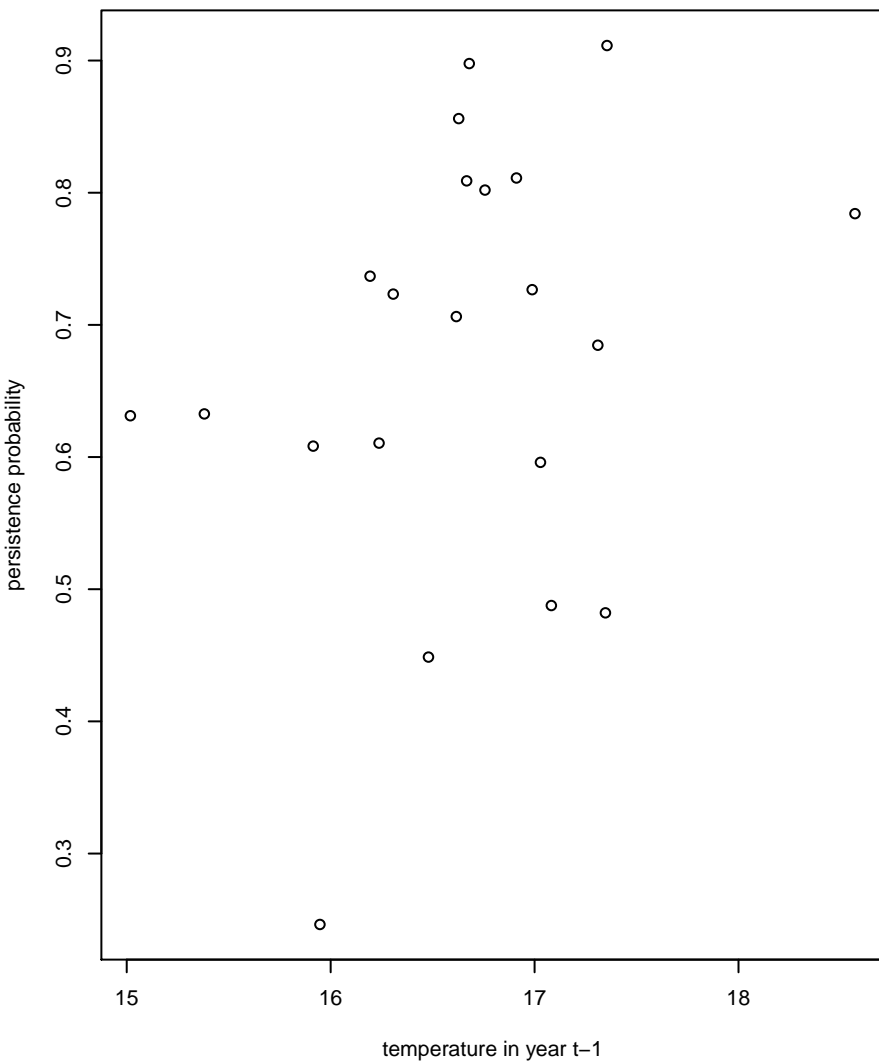

**Tetrix subulata**

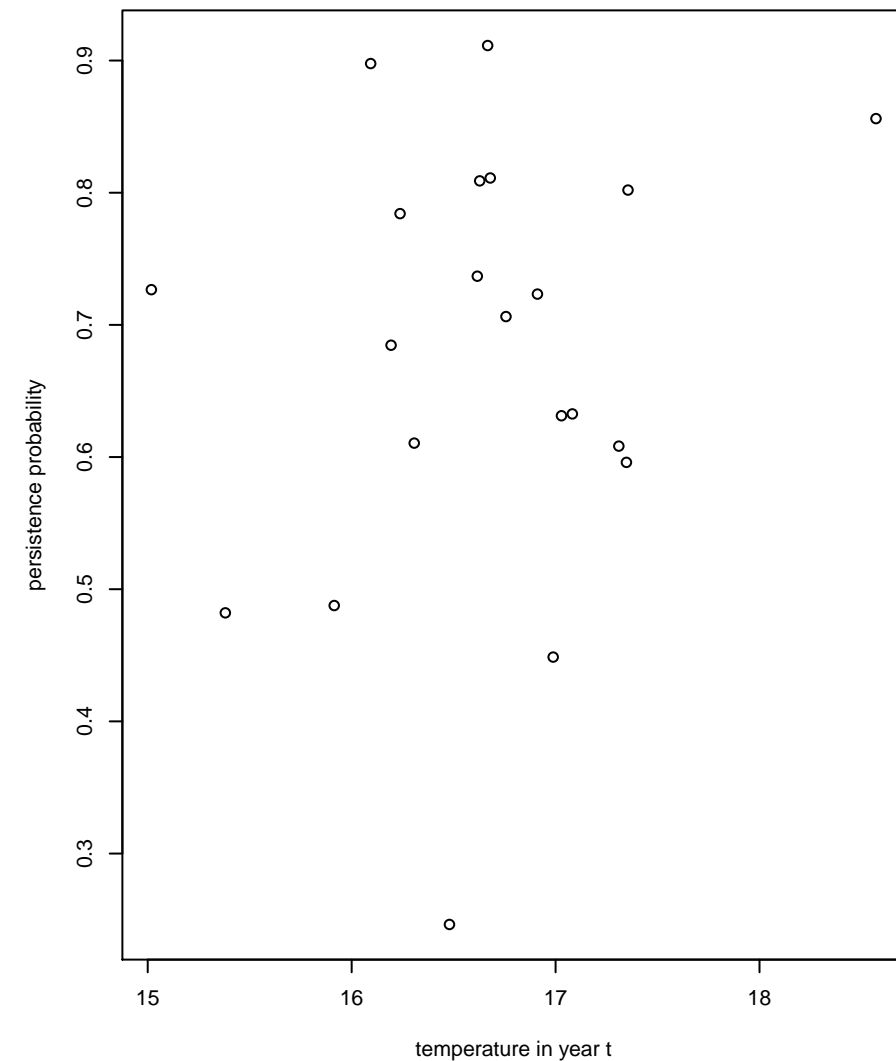

**Tetrix tenuicornis**

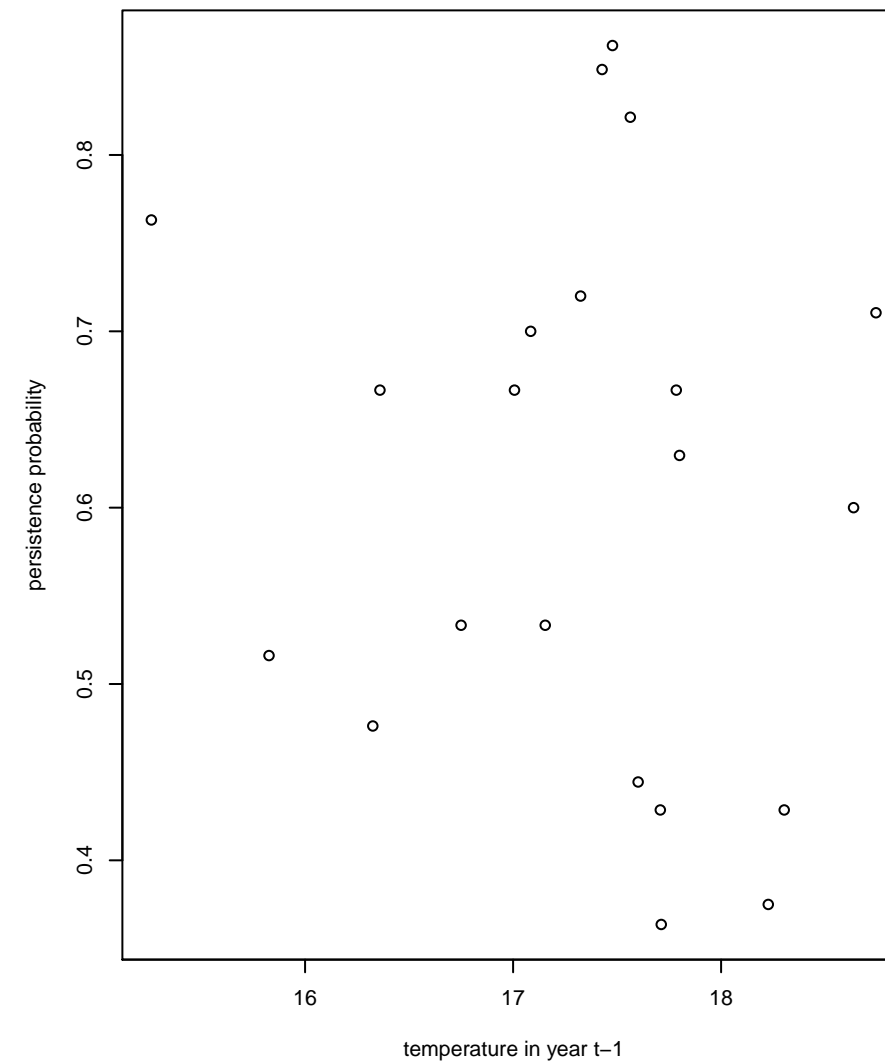

**Tetrix tenuicornis**

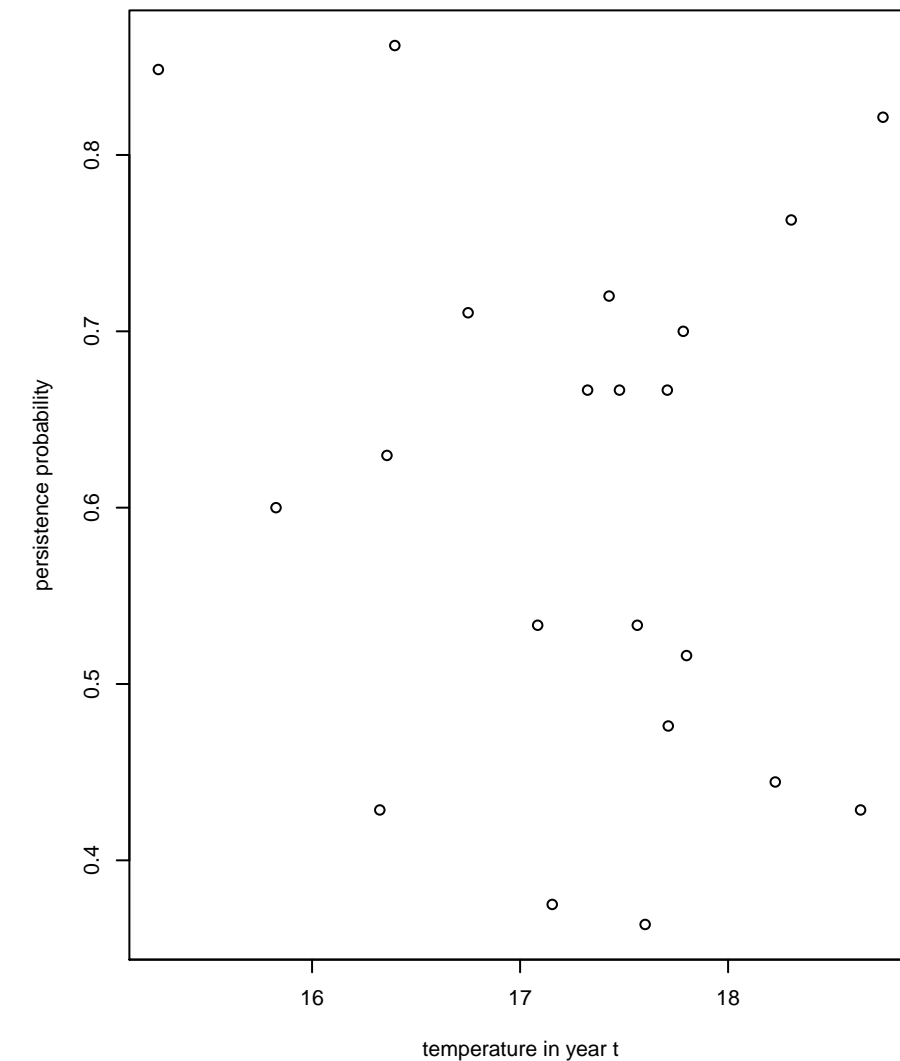

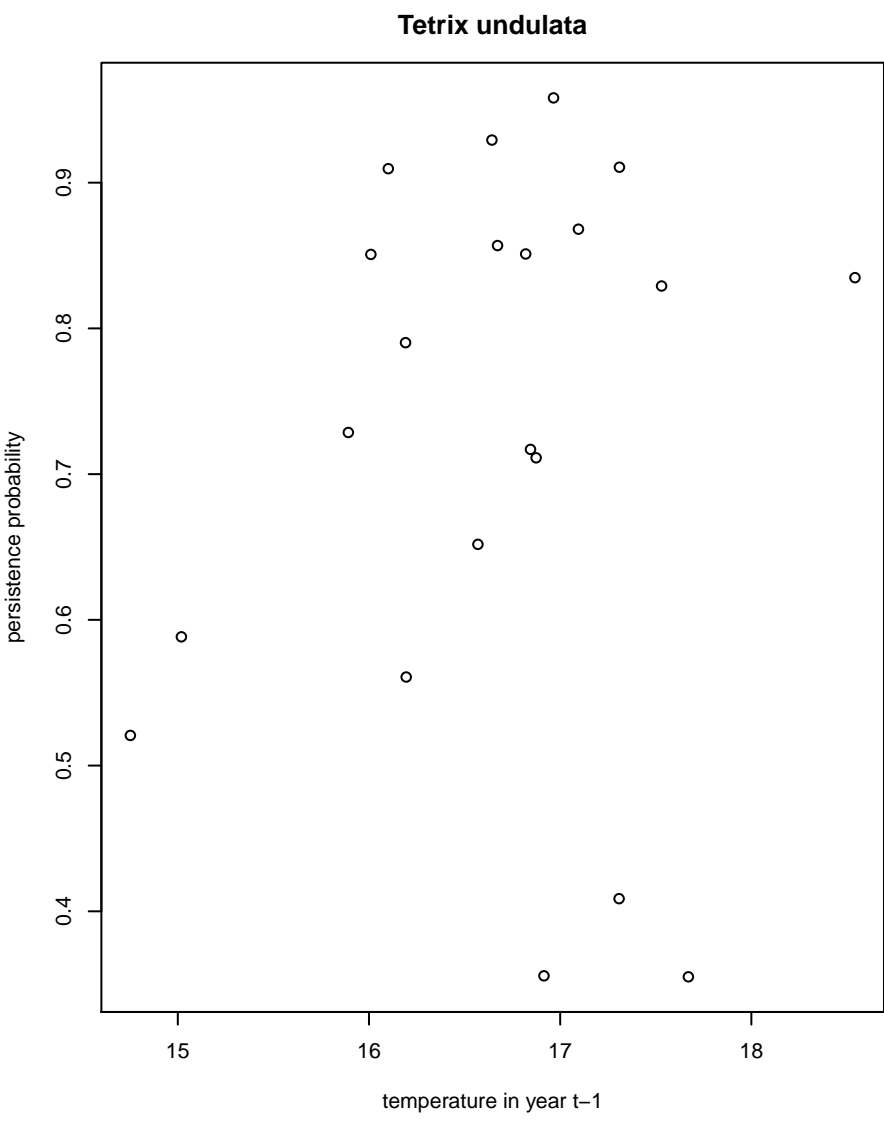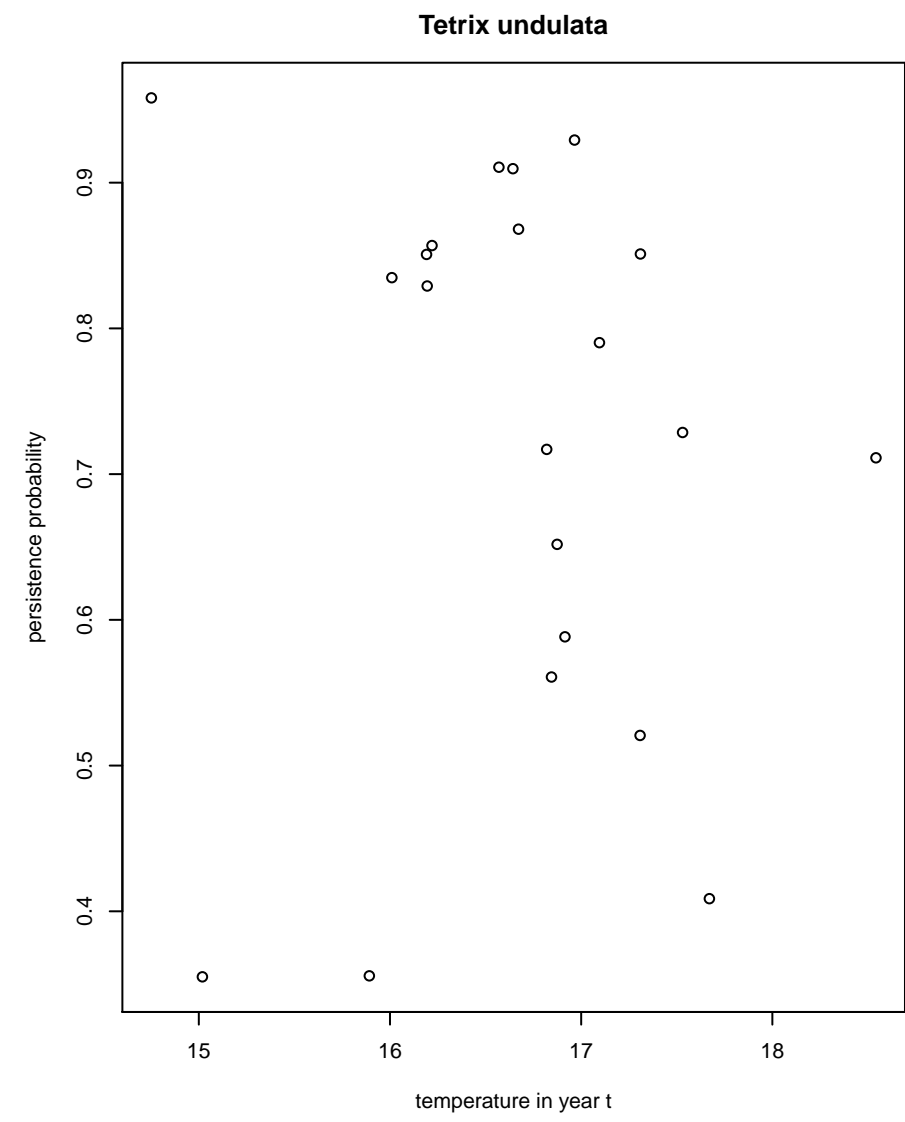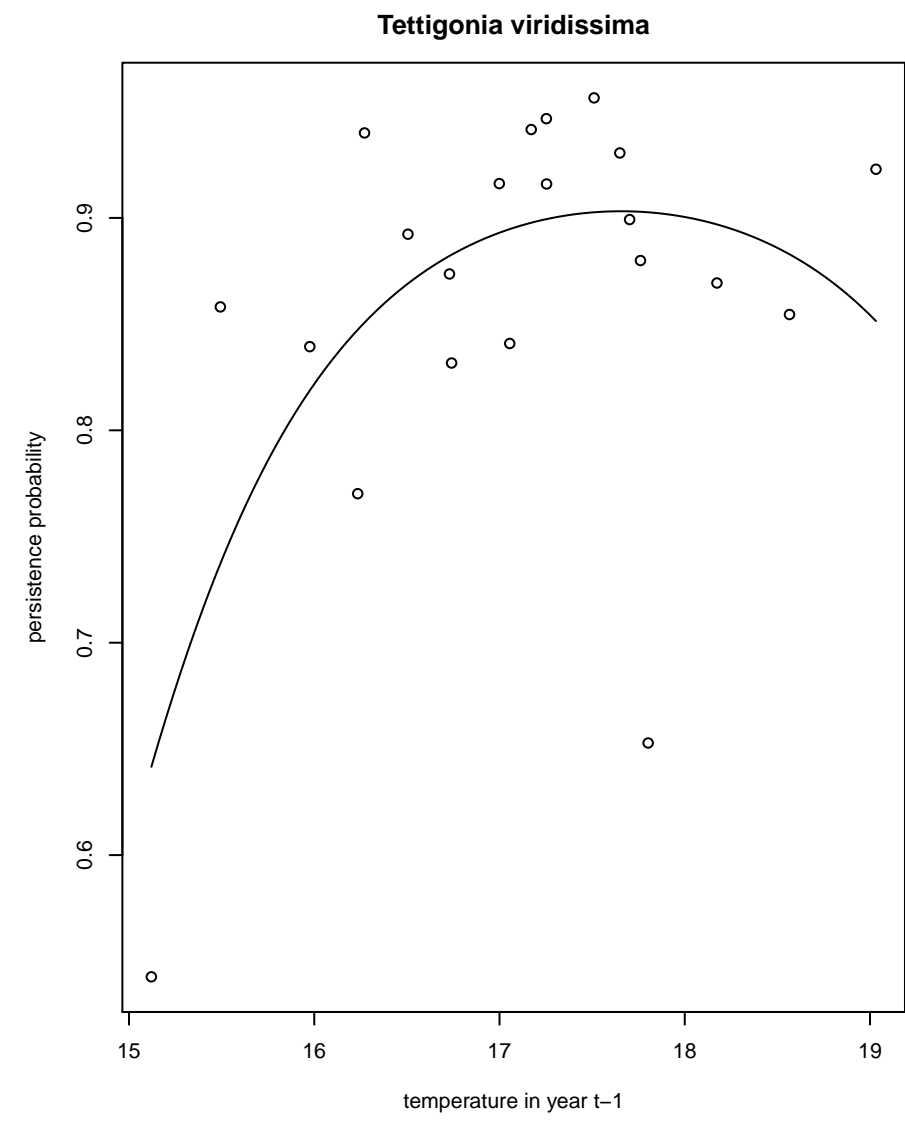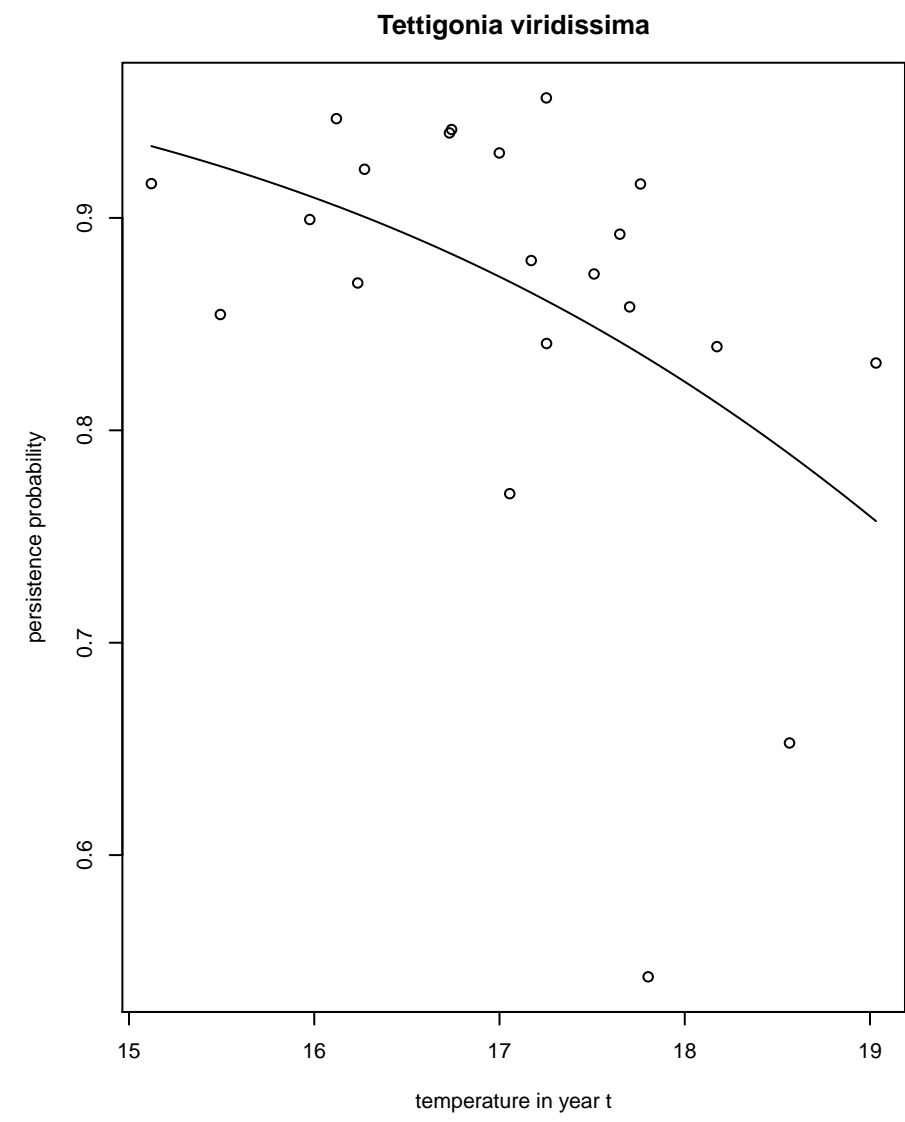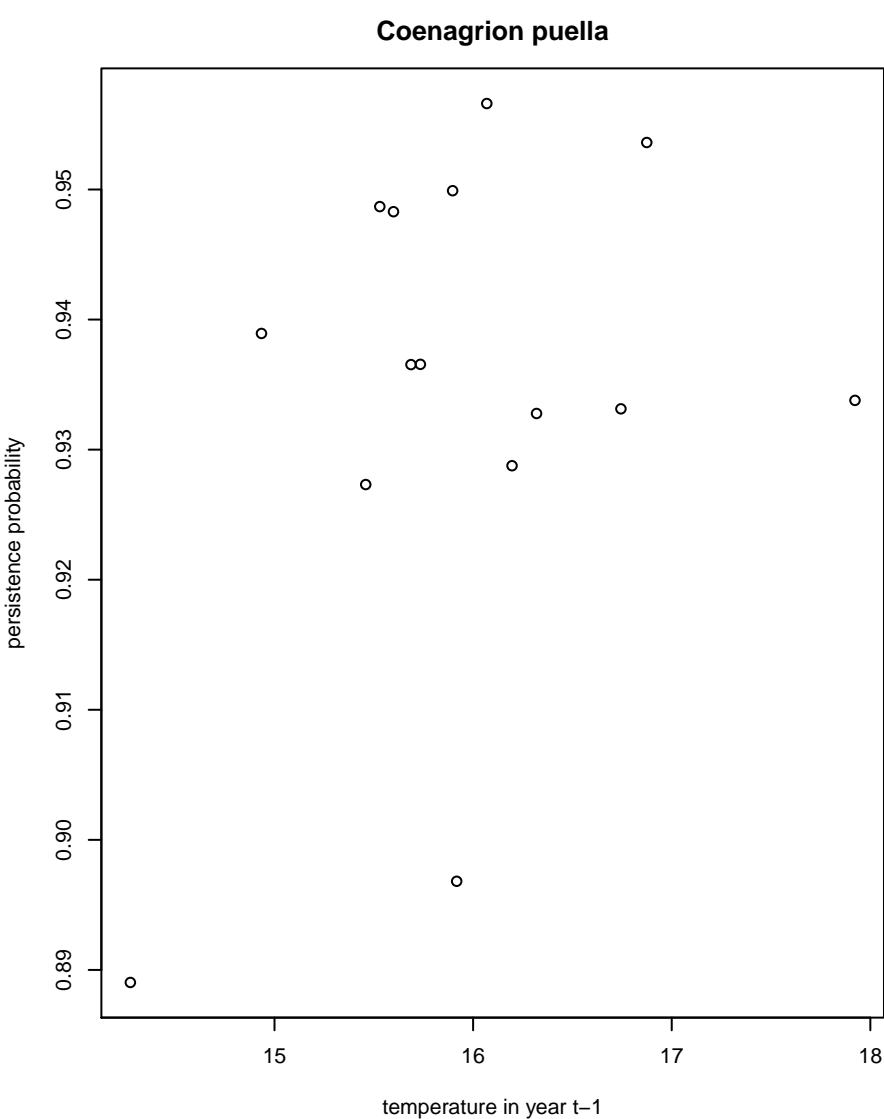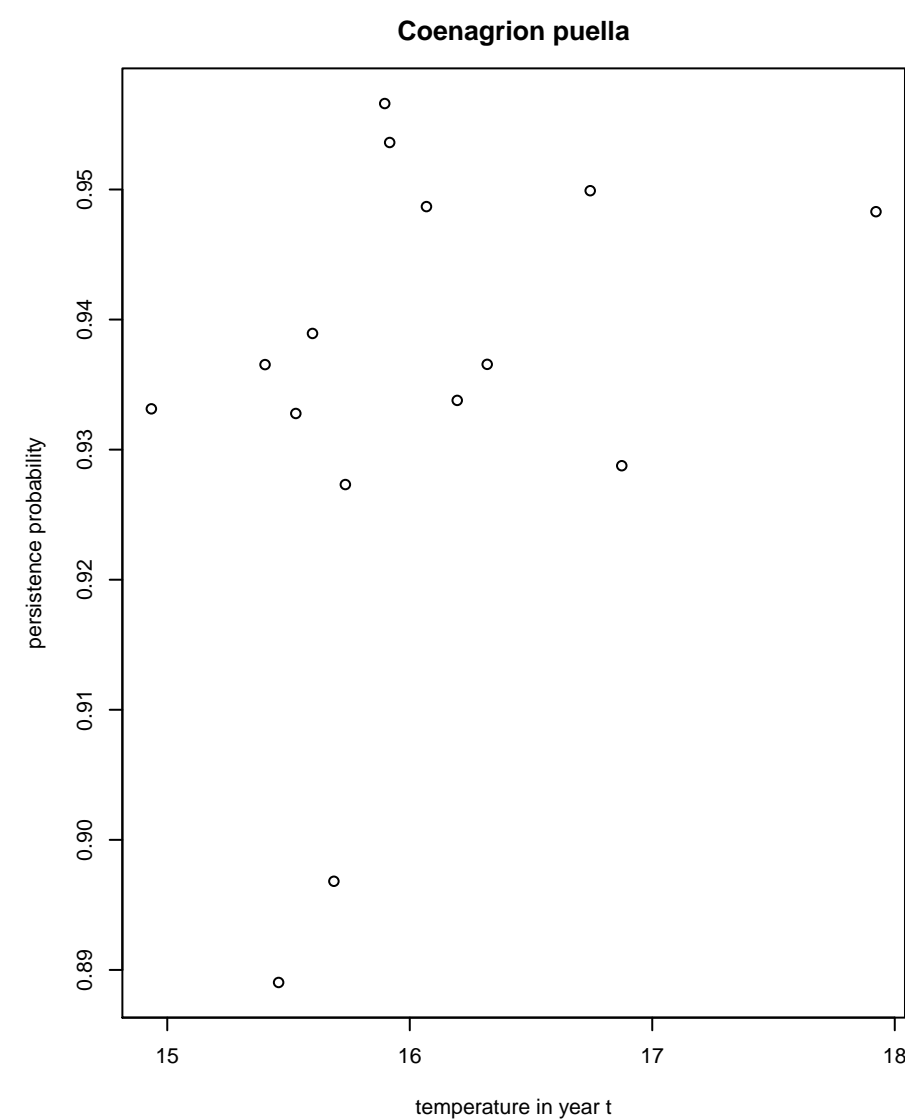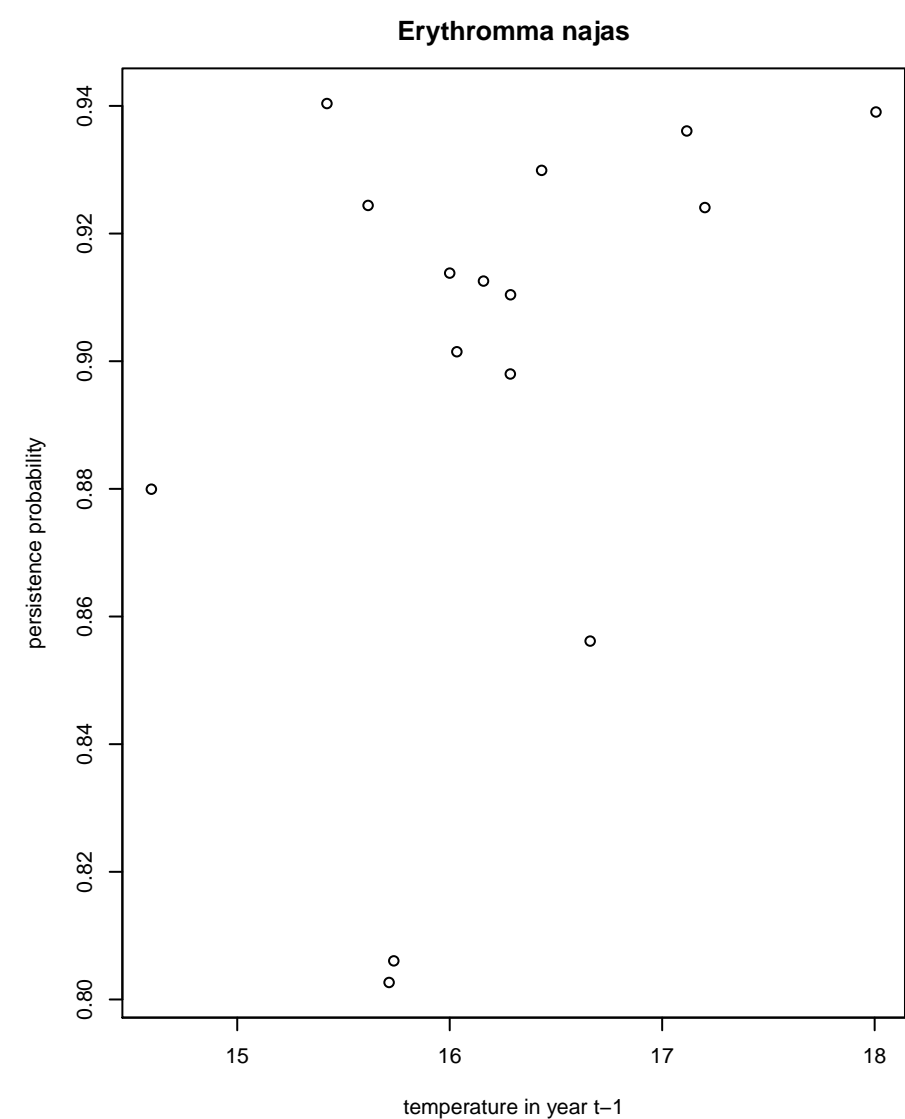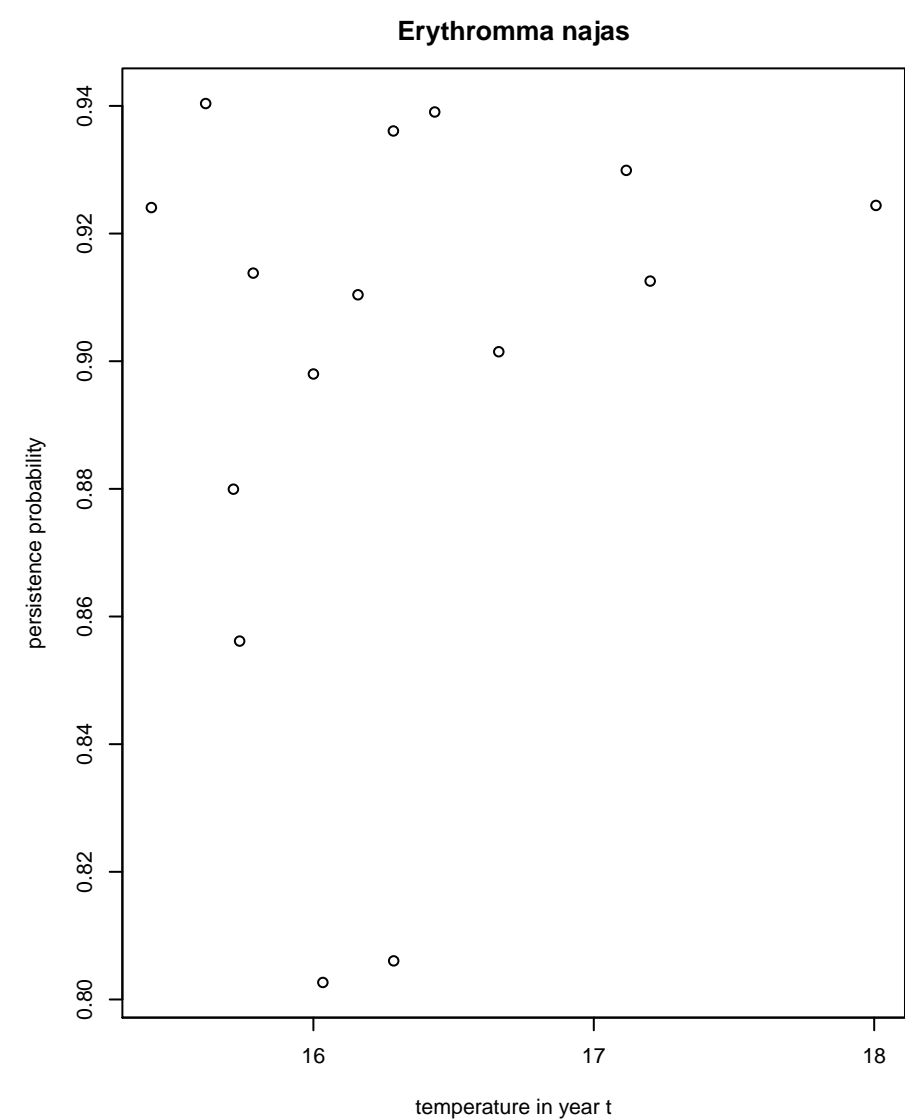

**Brachytron pratense**

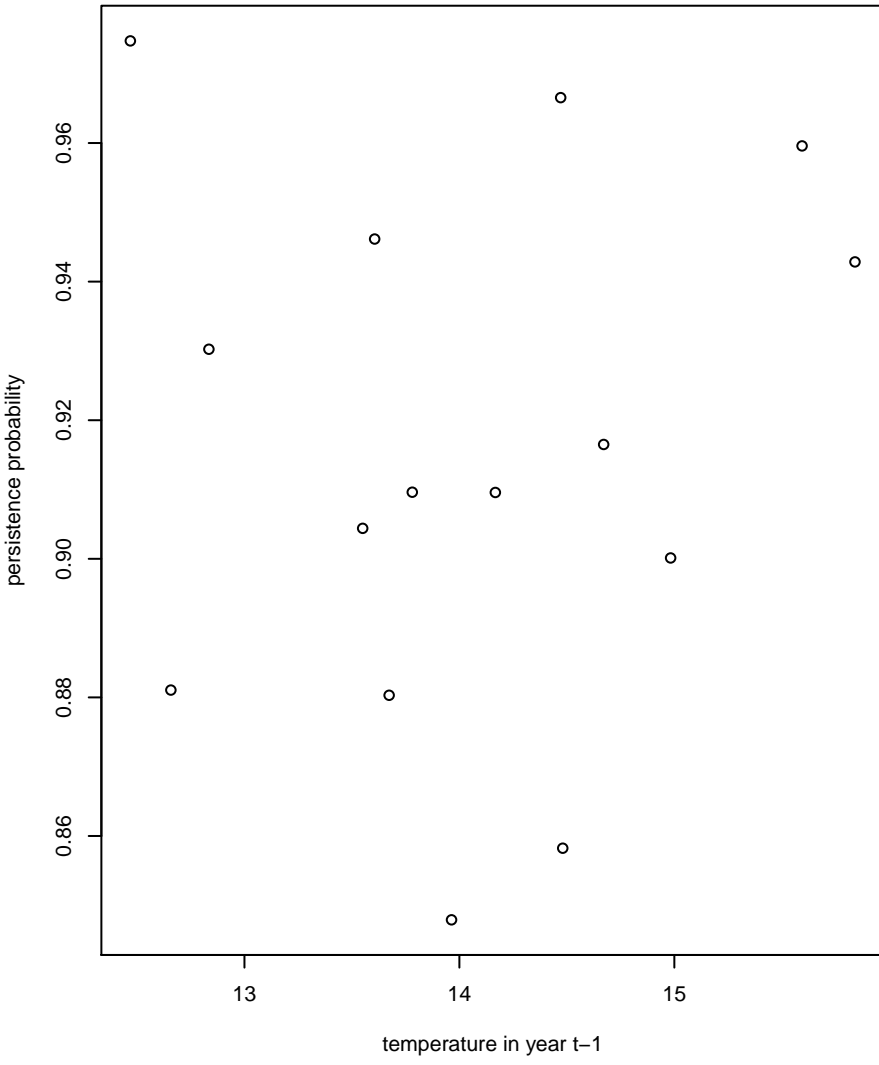

**Brachytron pratense**

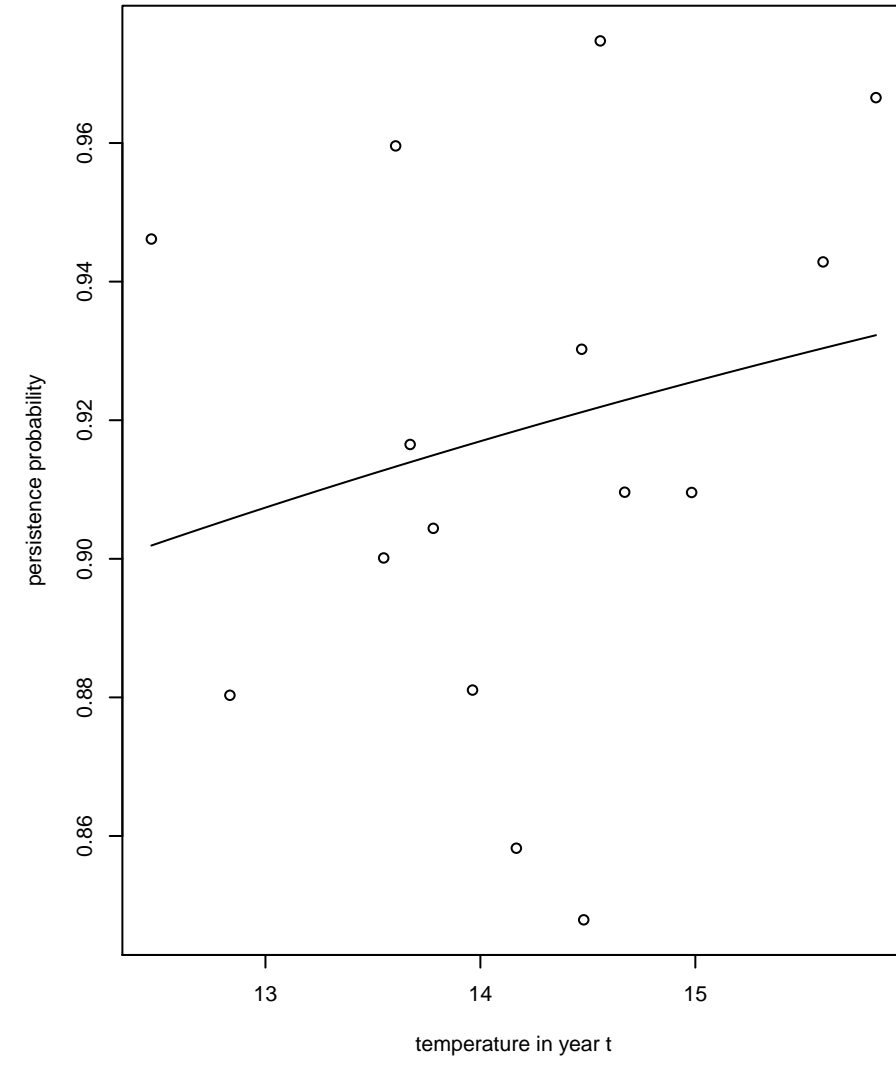

**Pyrrhosoma nymphula**

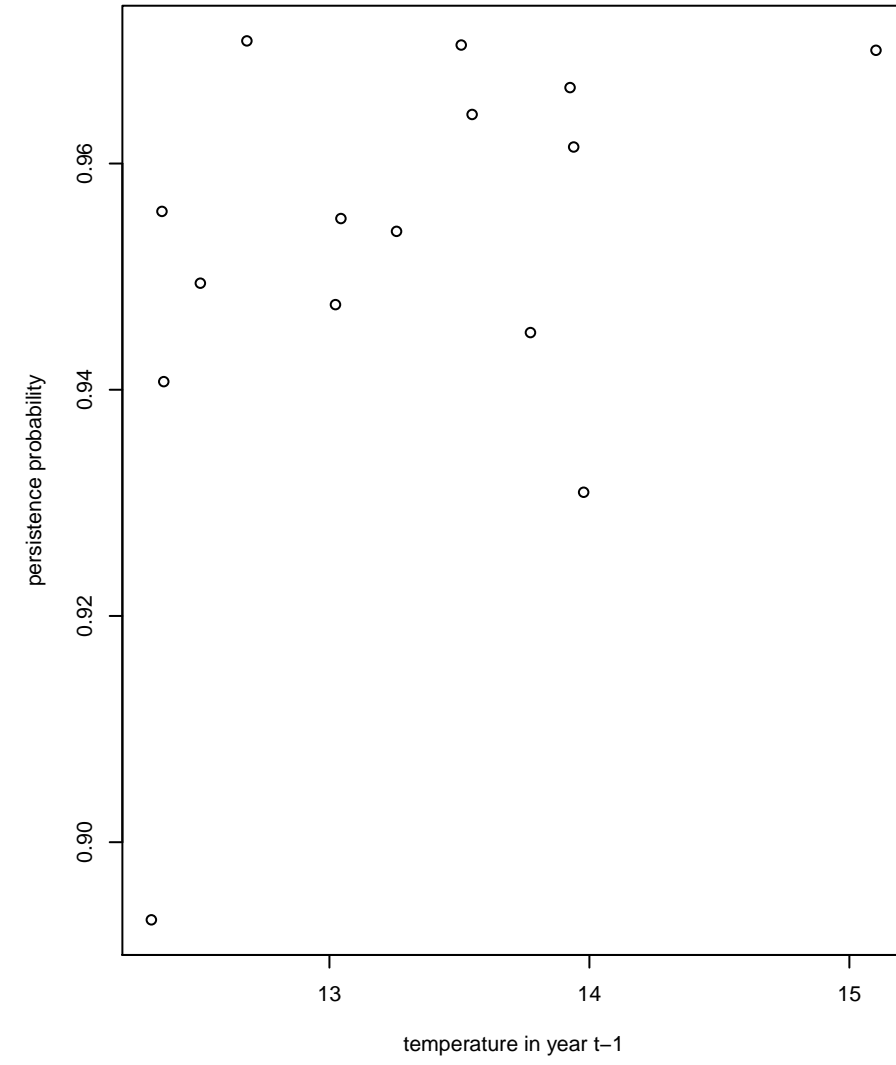

**Pyrrhosoma nymphula**

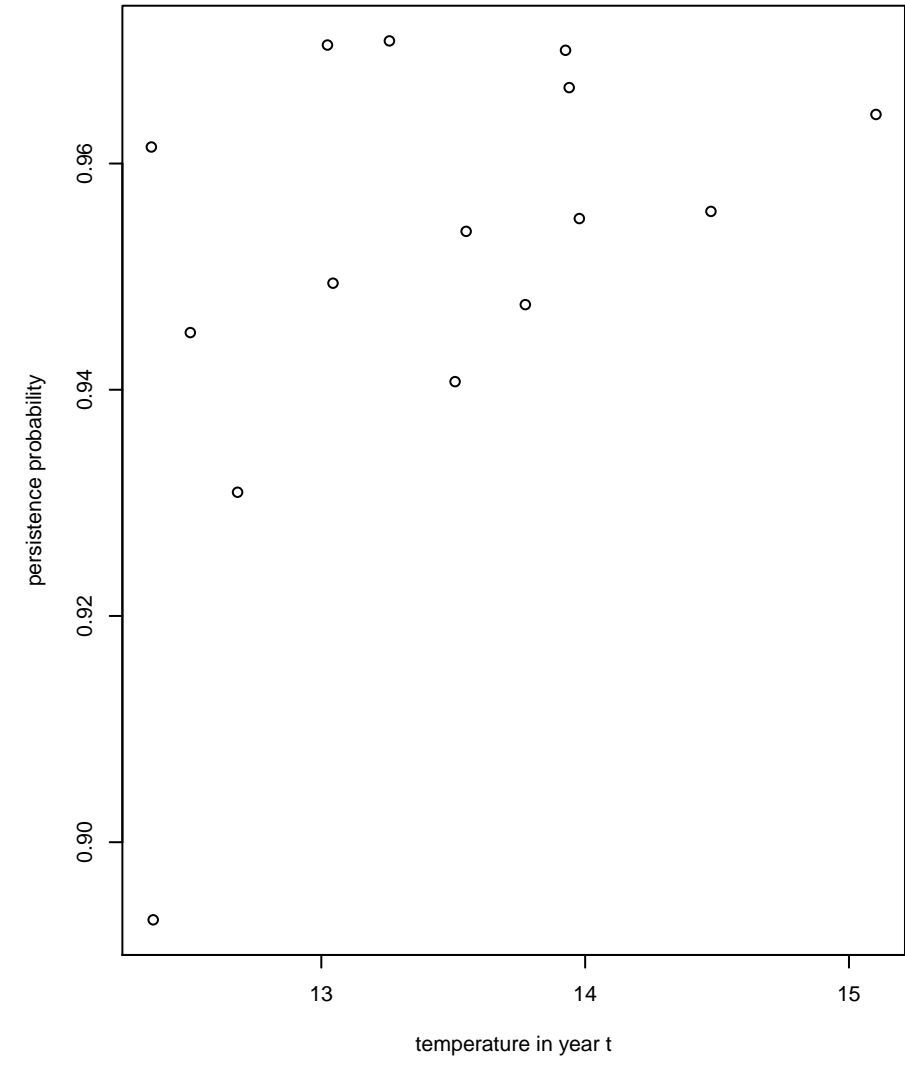

**Coenagrion pulchellum**

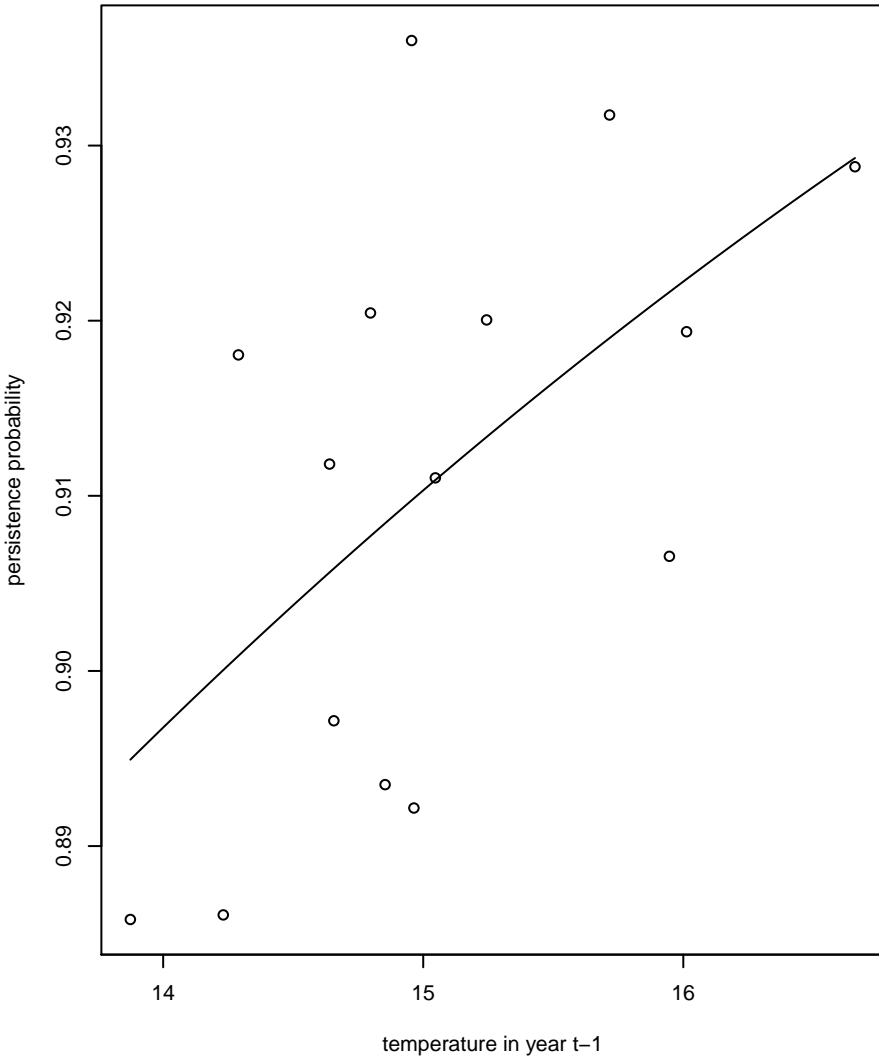

**Coenagrion pulchellum**

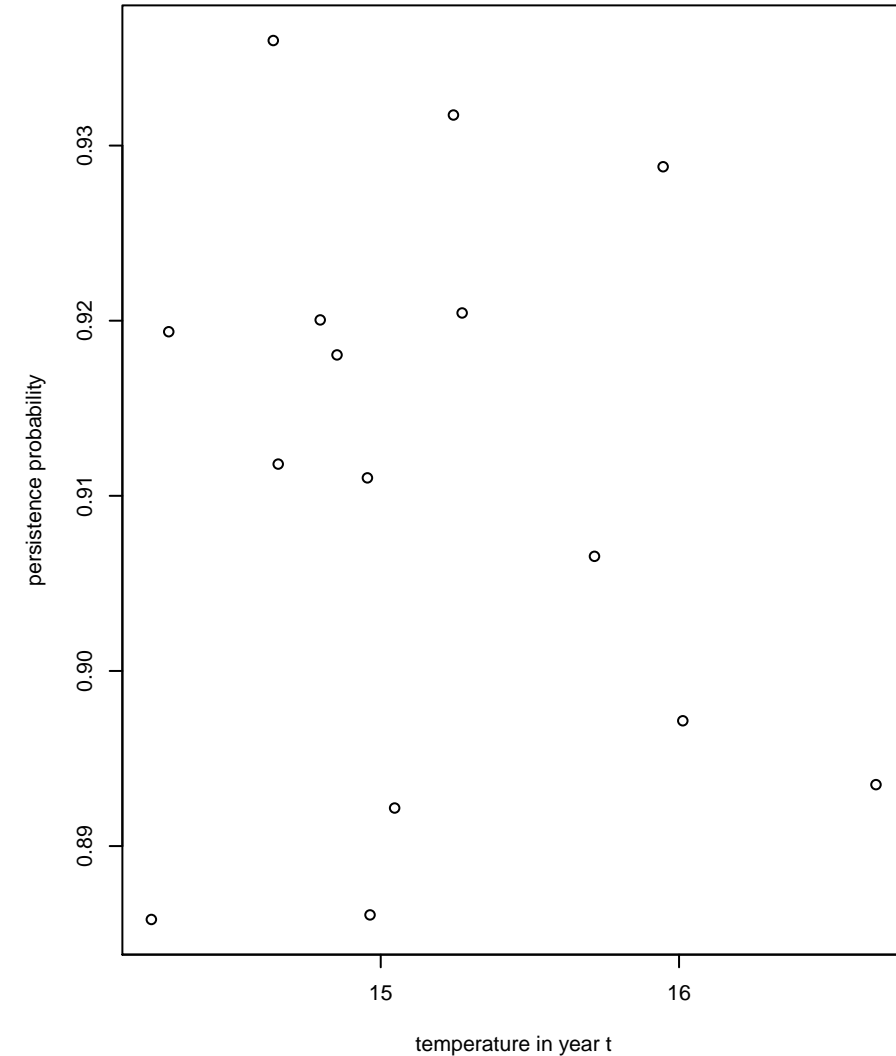

**Sympetrum vulgatum**

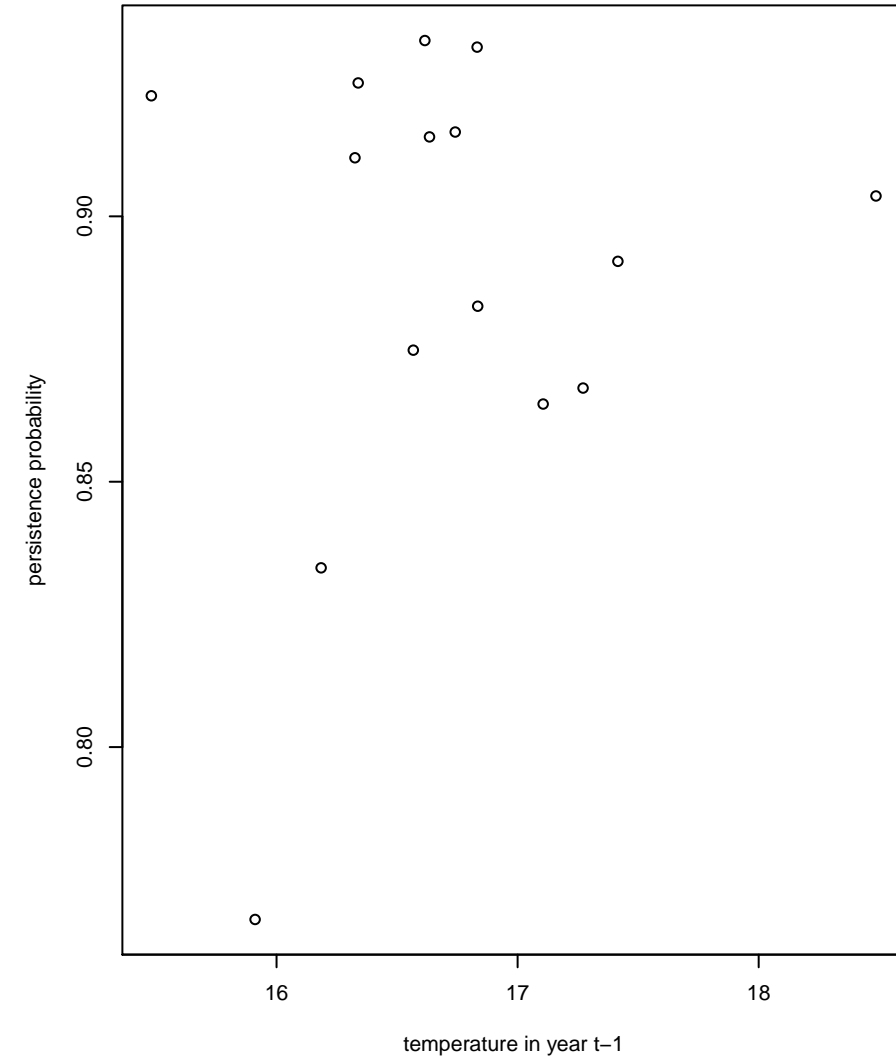

**Sympetrum vulgatum**

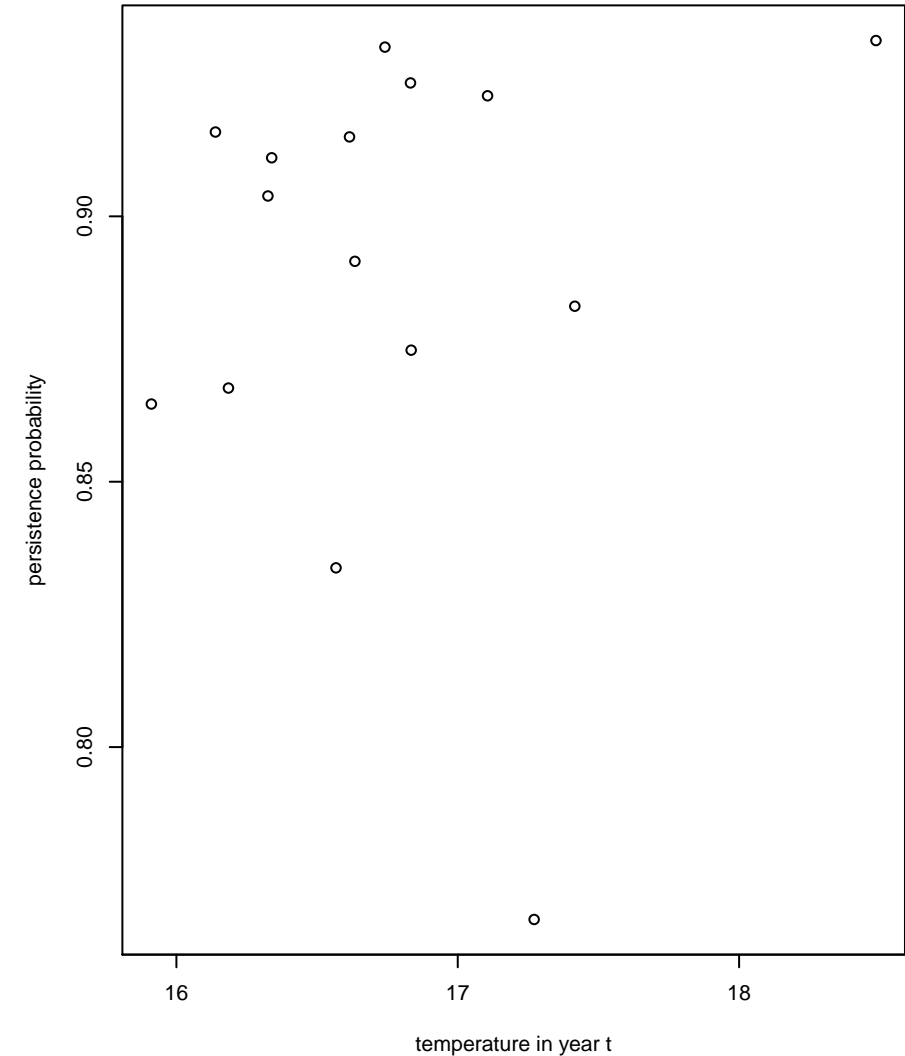

**Ischnura elegans**

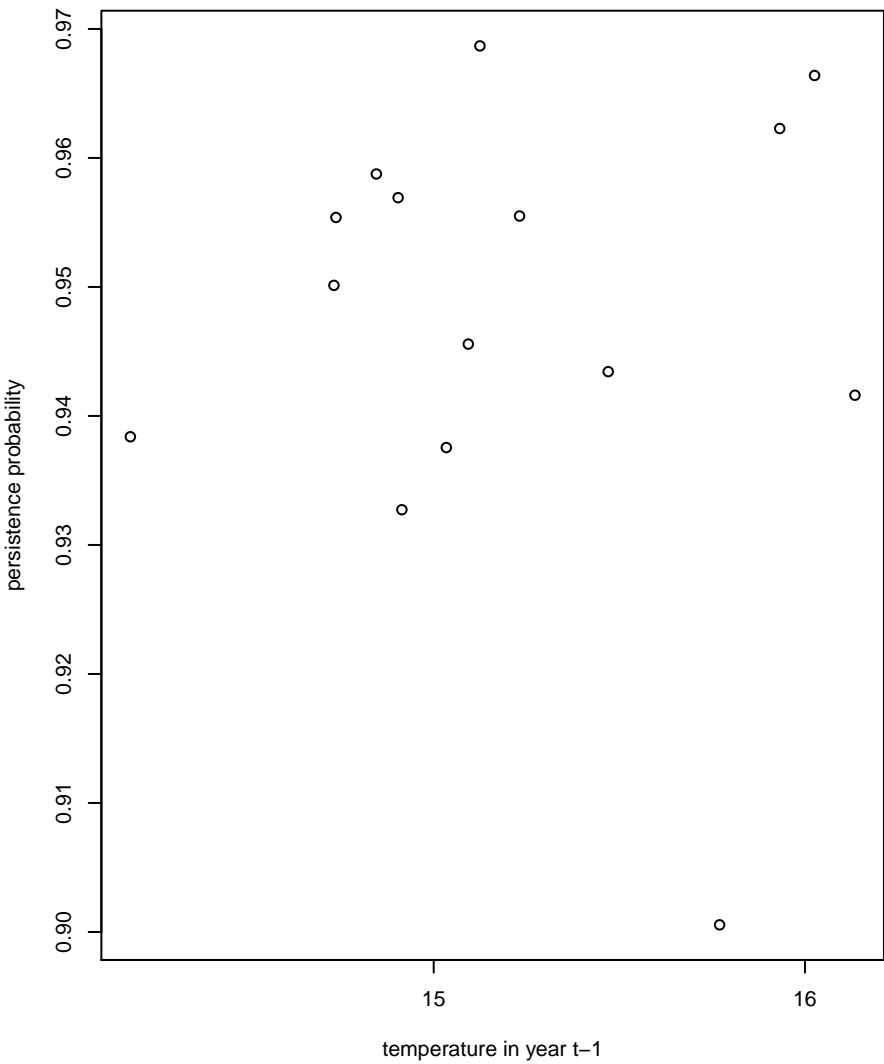

**Ischnura elegans**

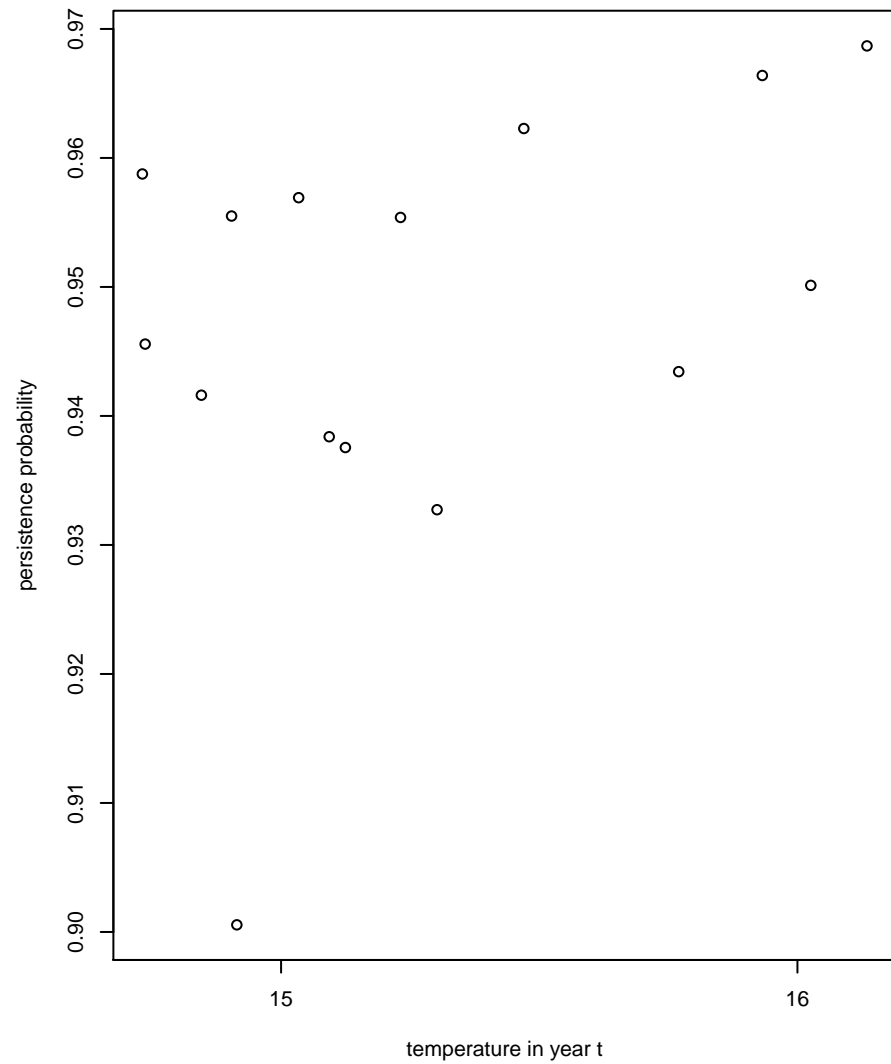

**Orthetrum cancellatum**

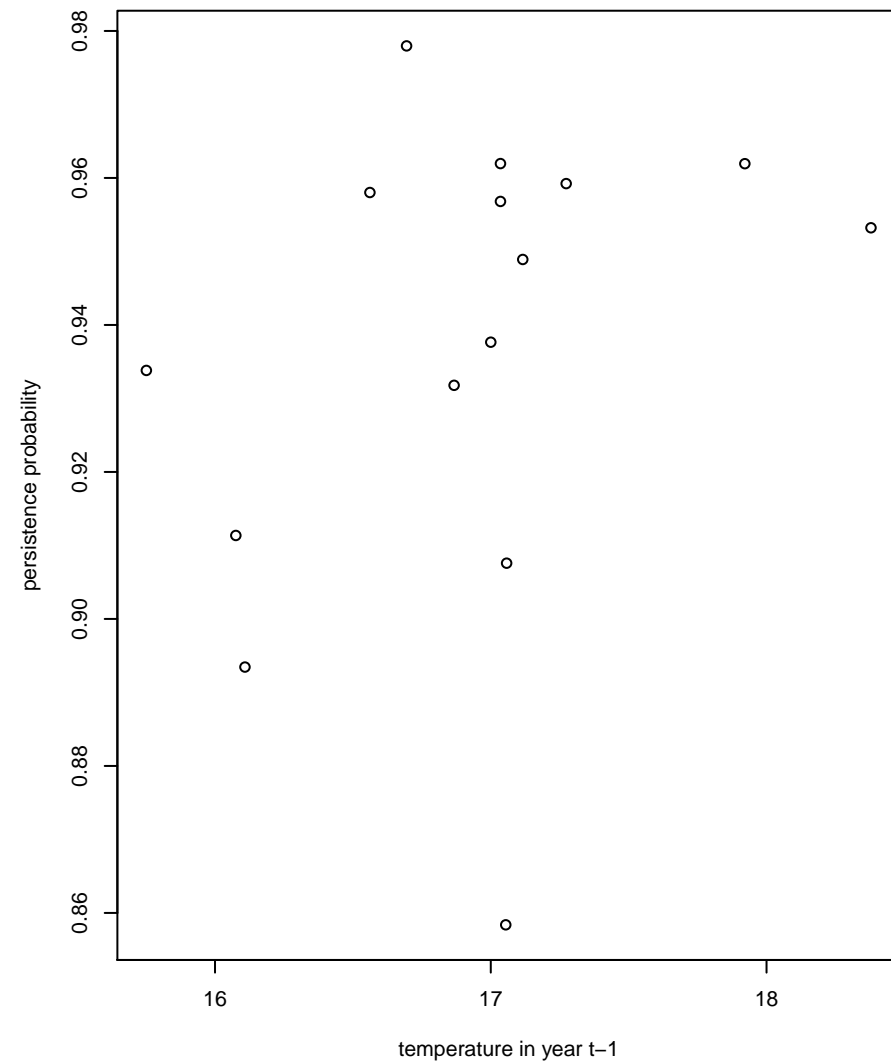

**Orthetrum cancellatum**

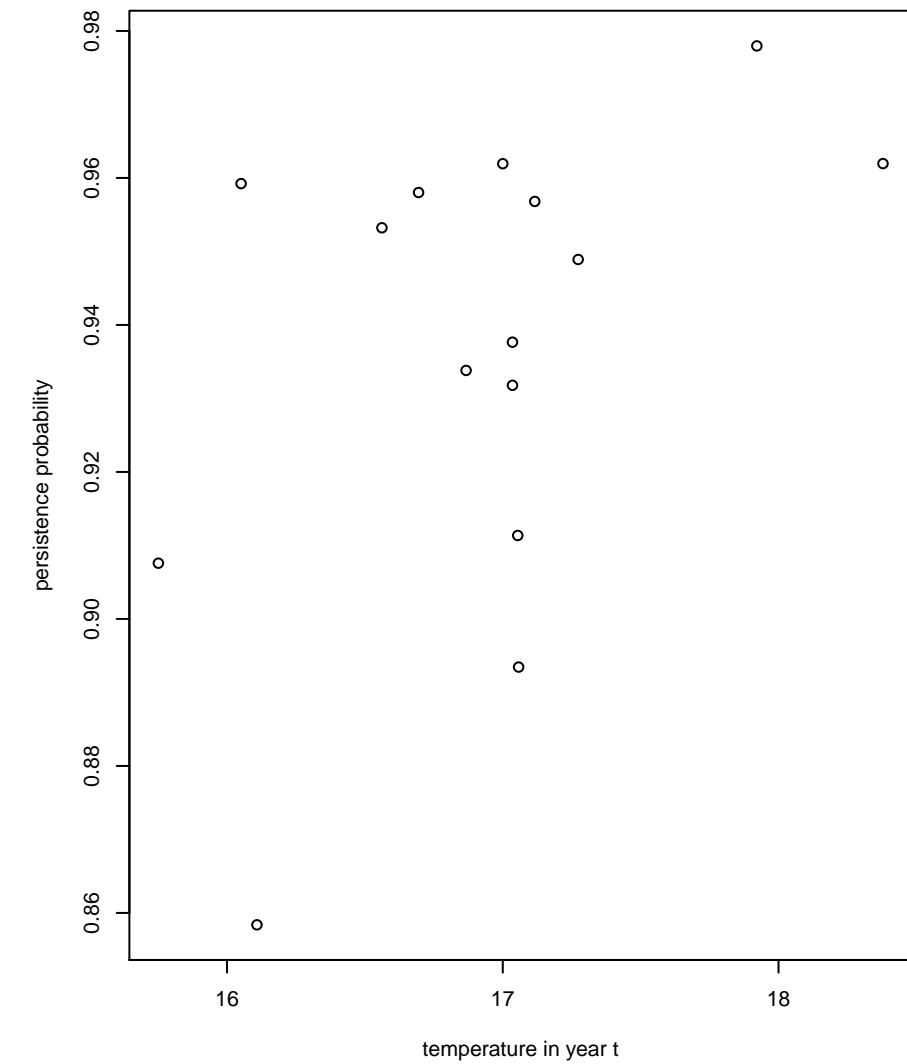

**Libellula quadrimaculata**

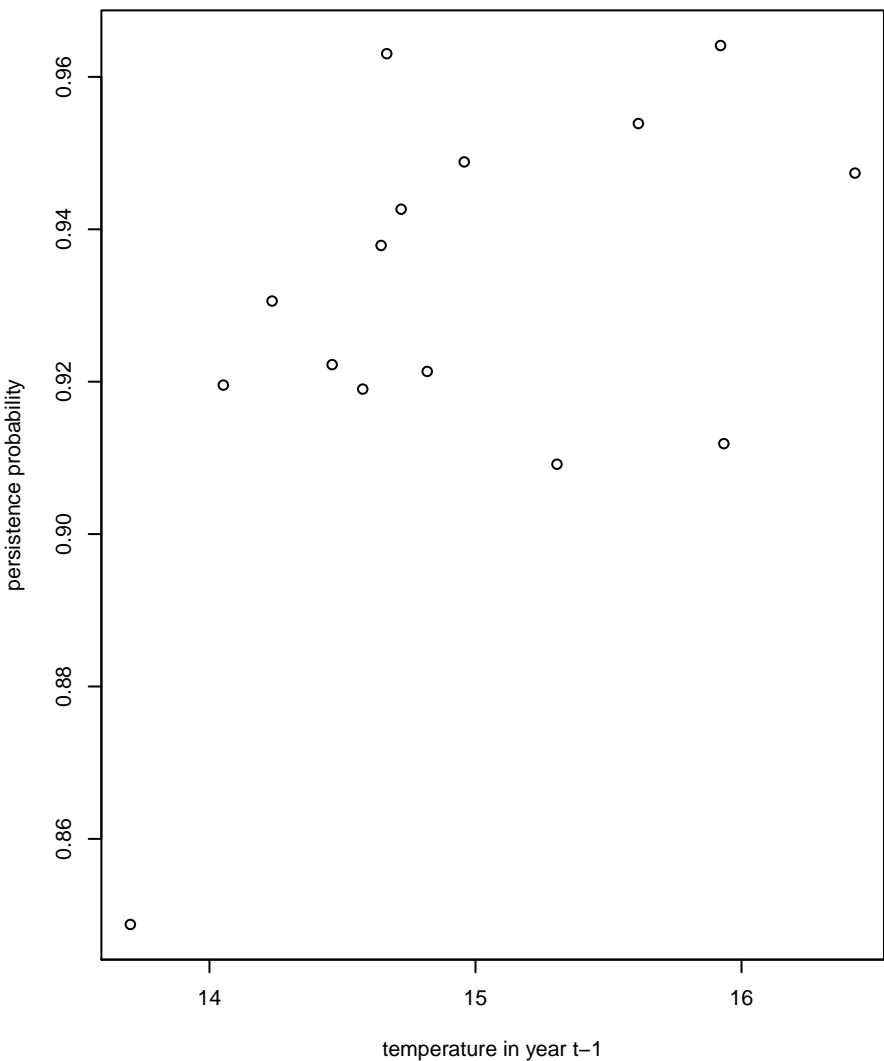

**Libellula quadrimaculata**

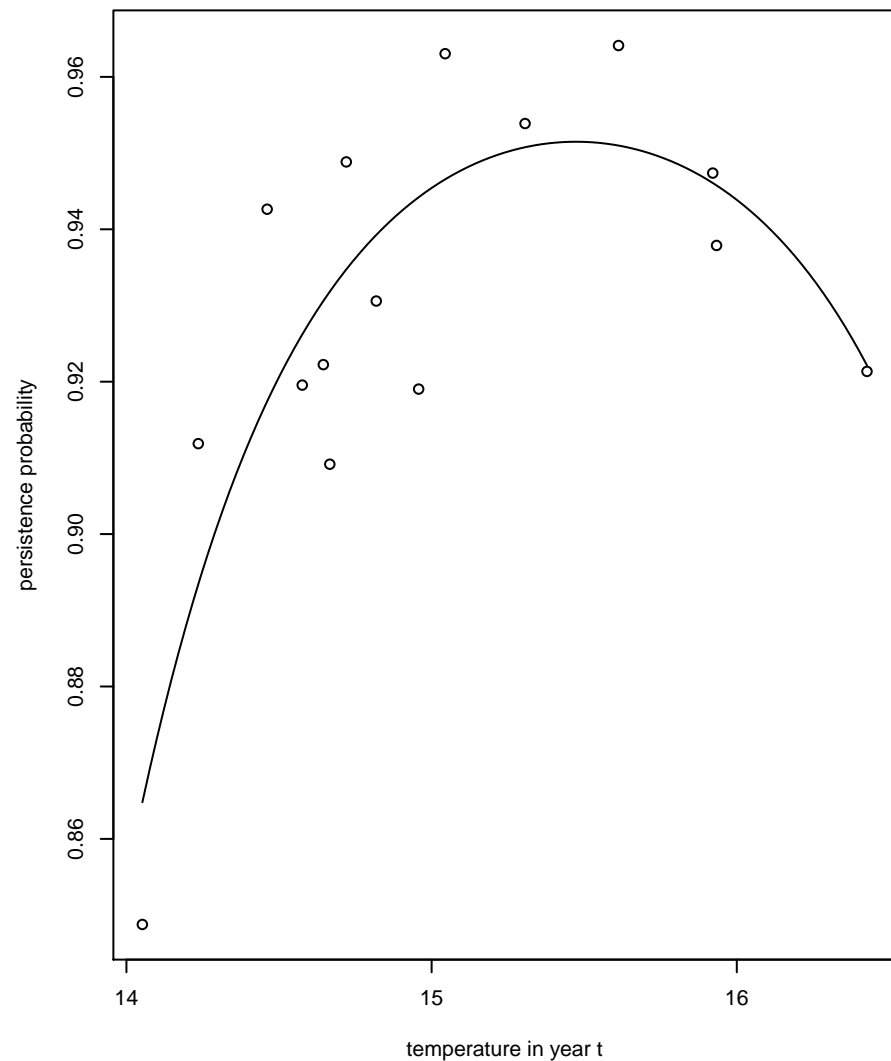

**Lestes sponsa**

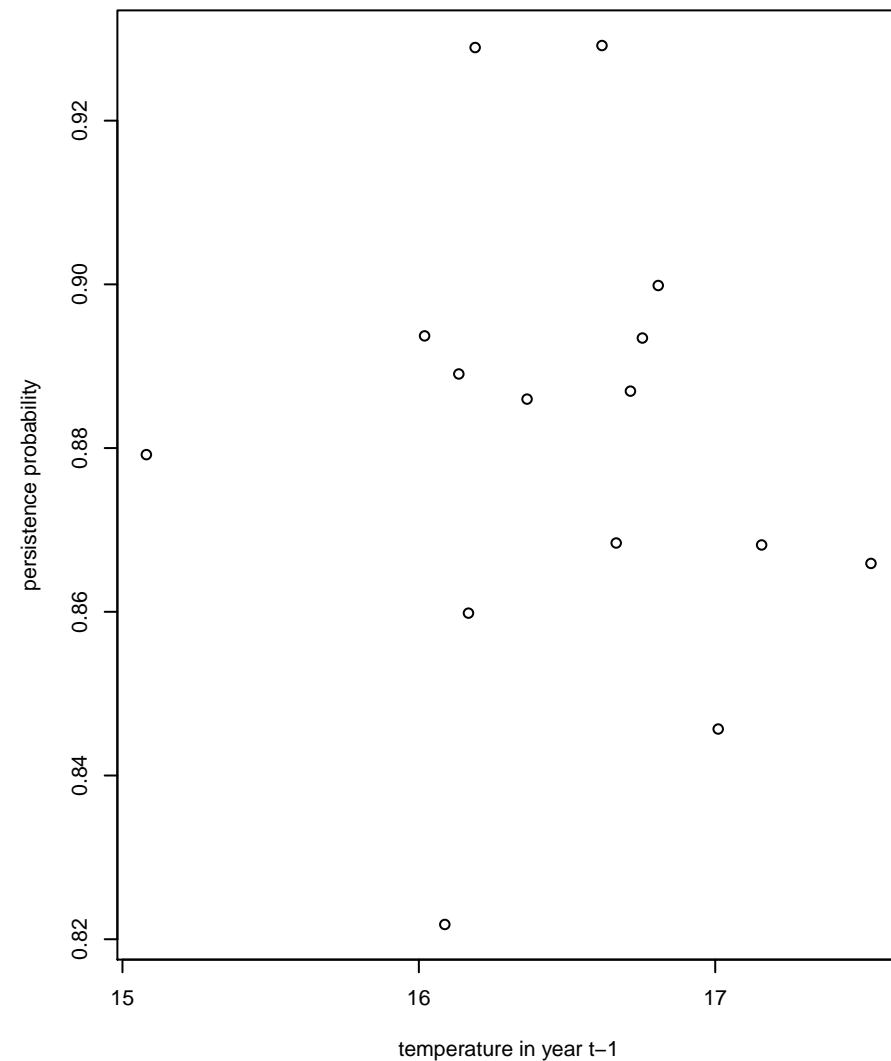

**Lestes sponsa**

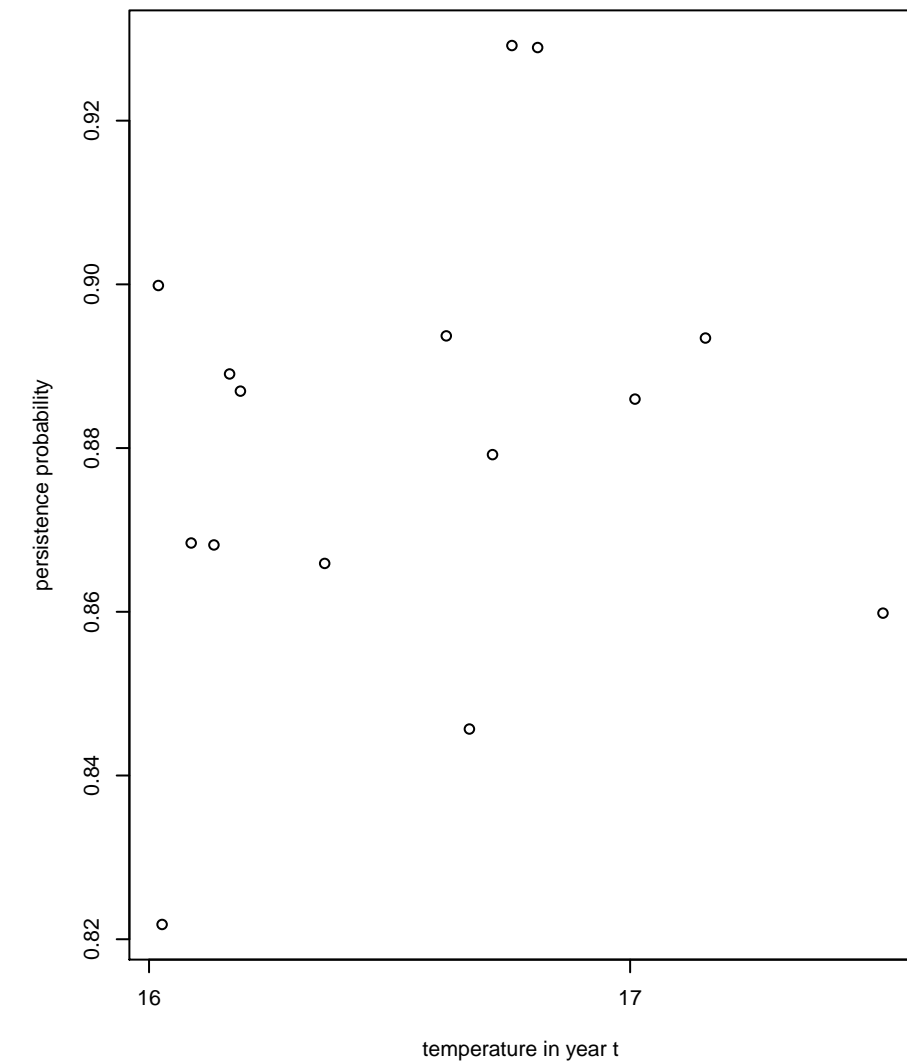

**Ceriagrion tenellum**

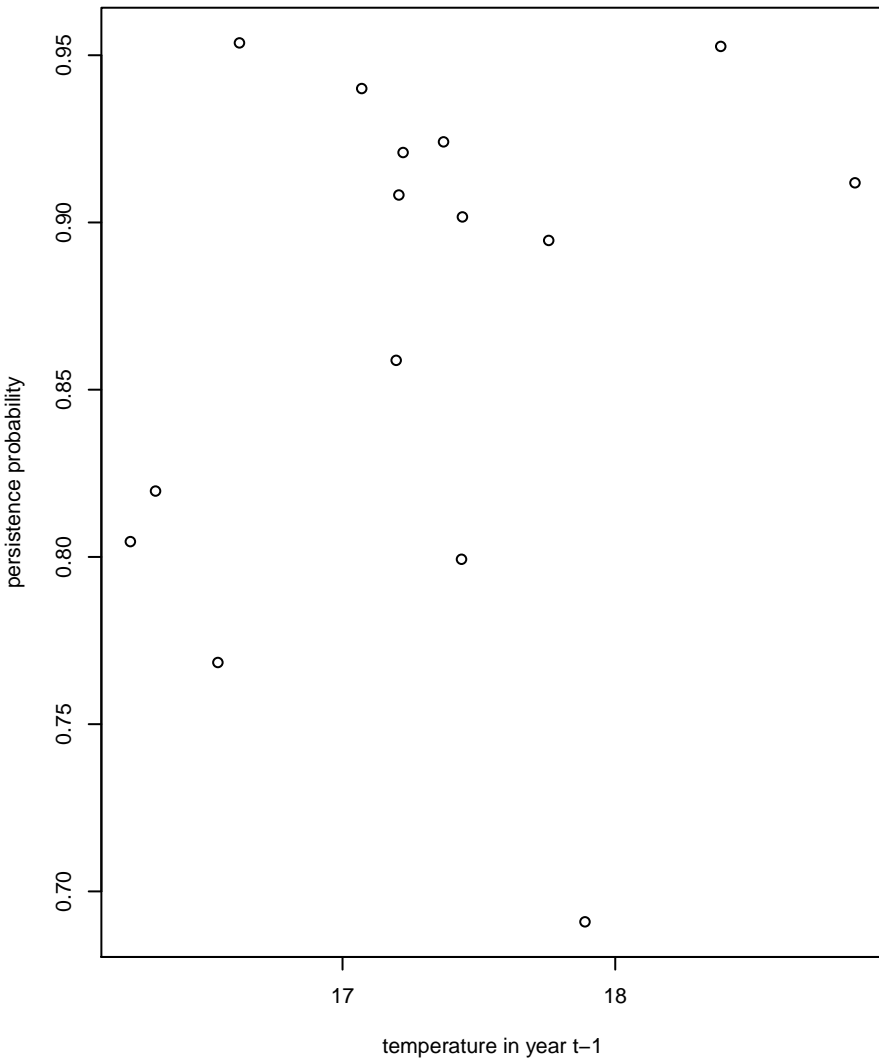

**Ceriagrion tenellum**

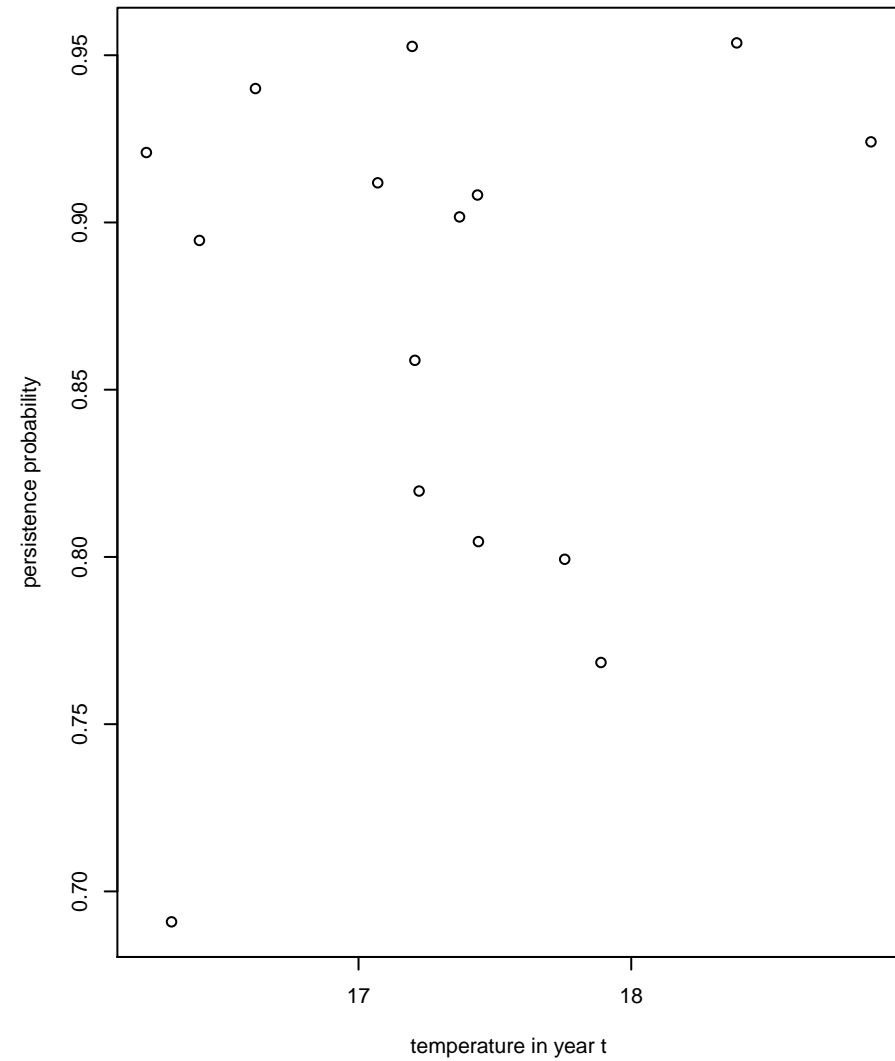

**Lestes barbarus**

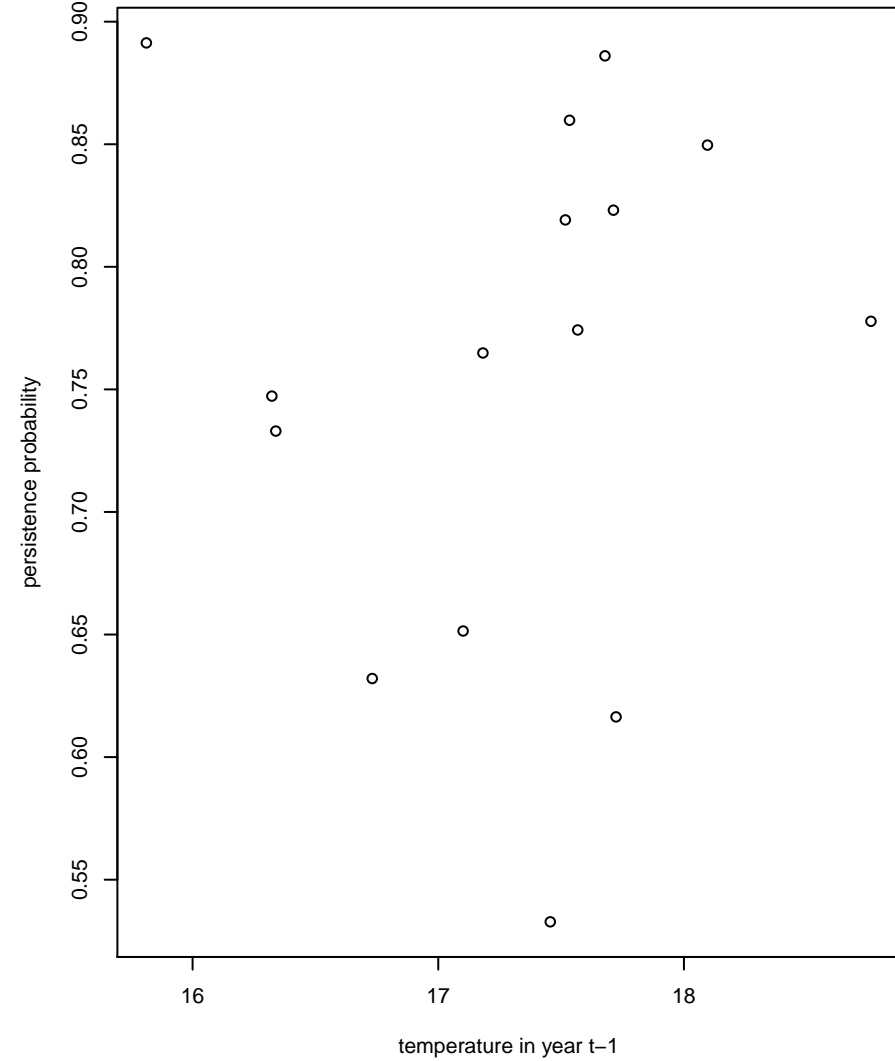

**Lestes barbarus**

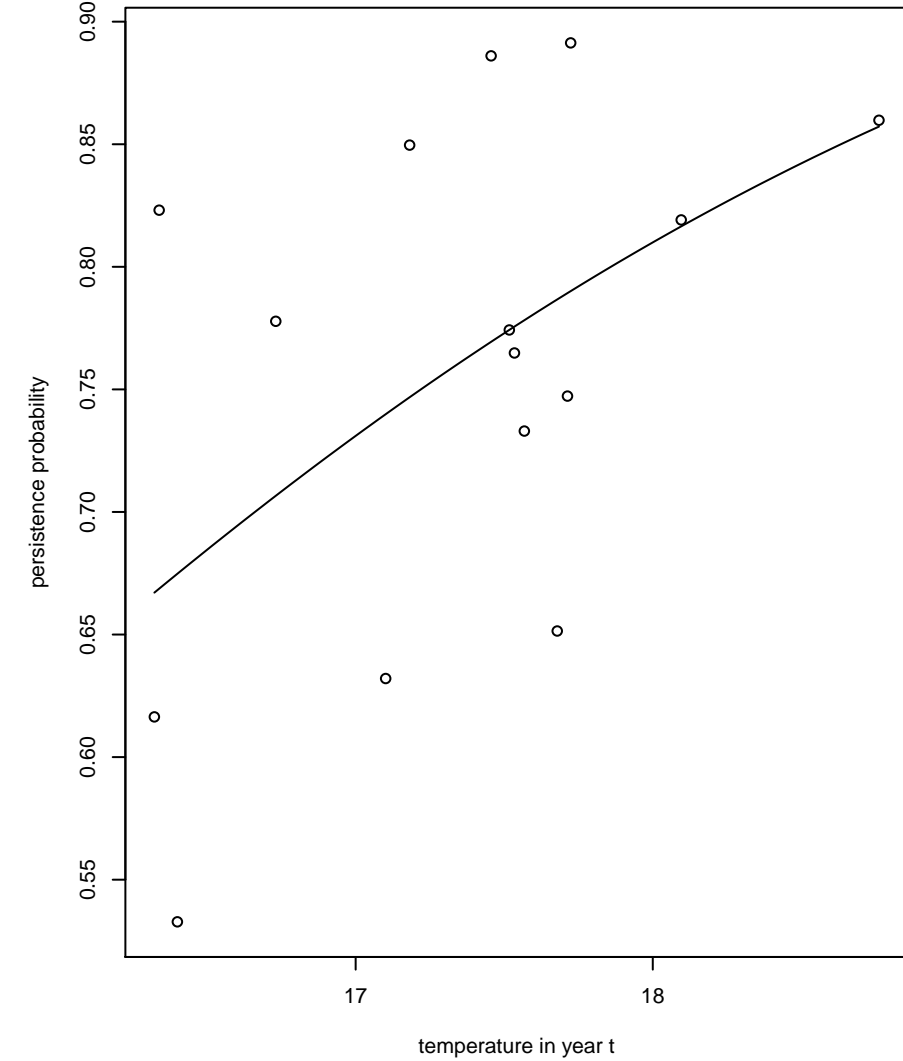

**Aeshna mixta**

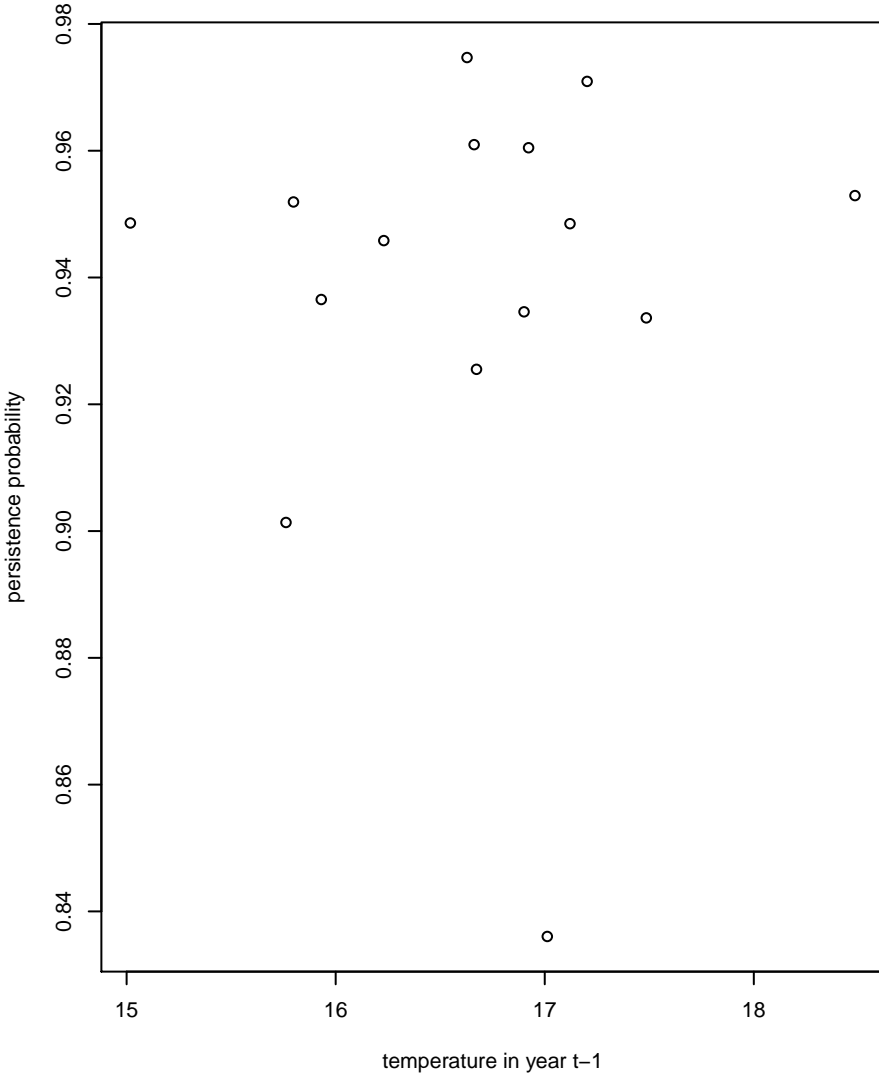

**Aeshna mixta**

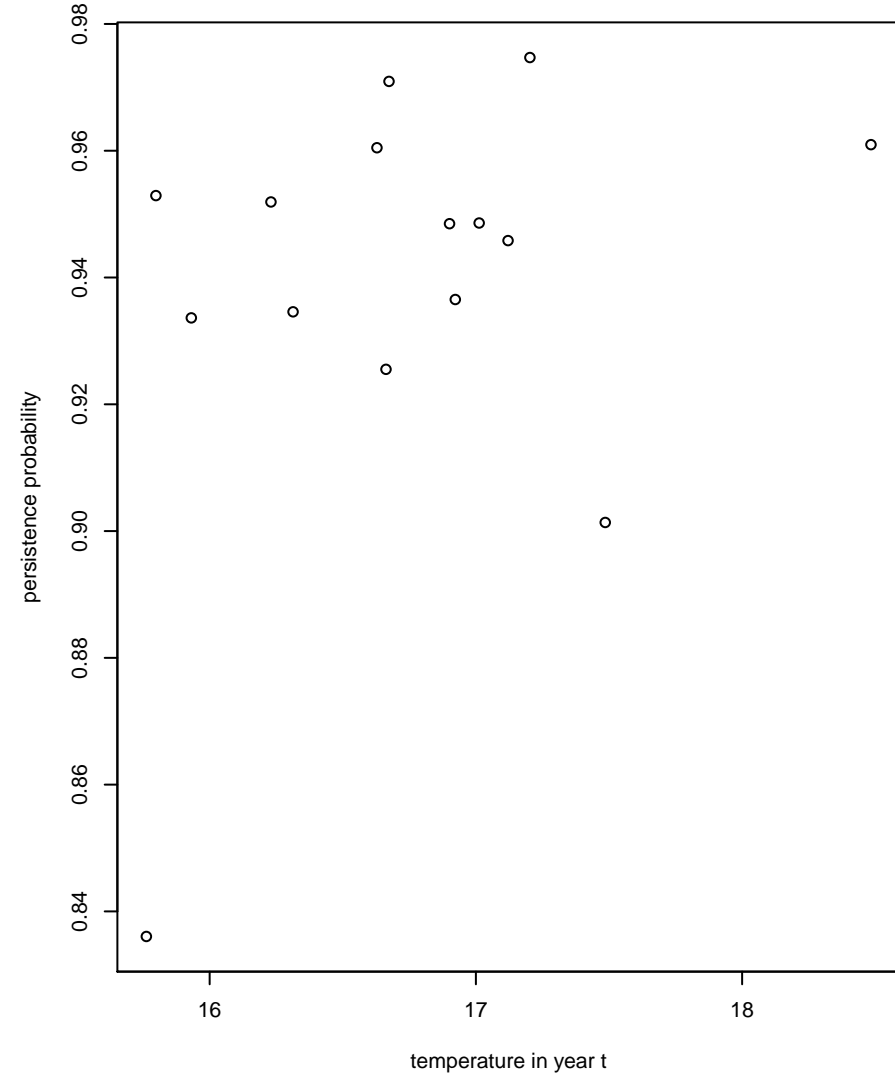

**Sympetrum sanguineum**

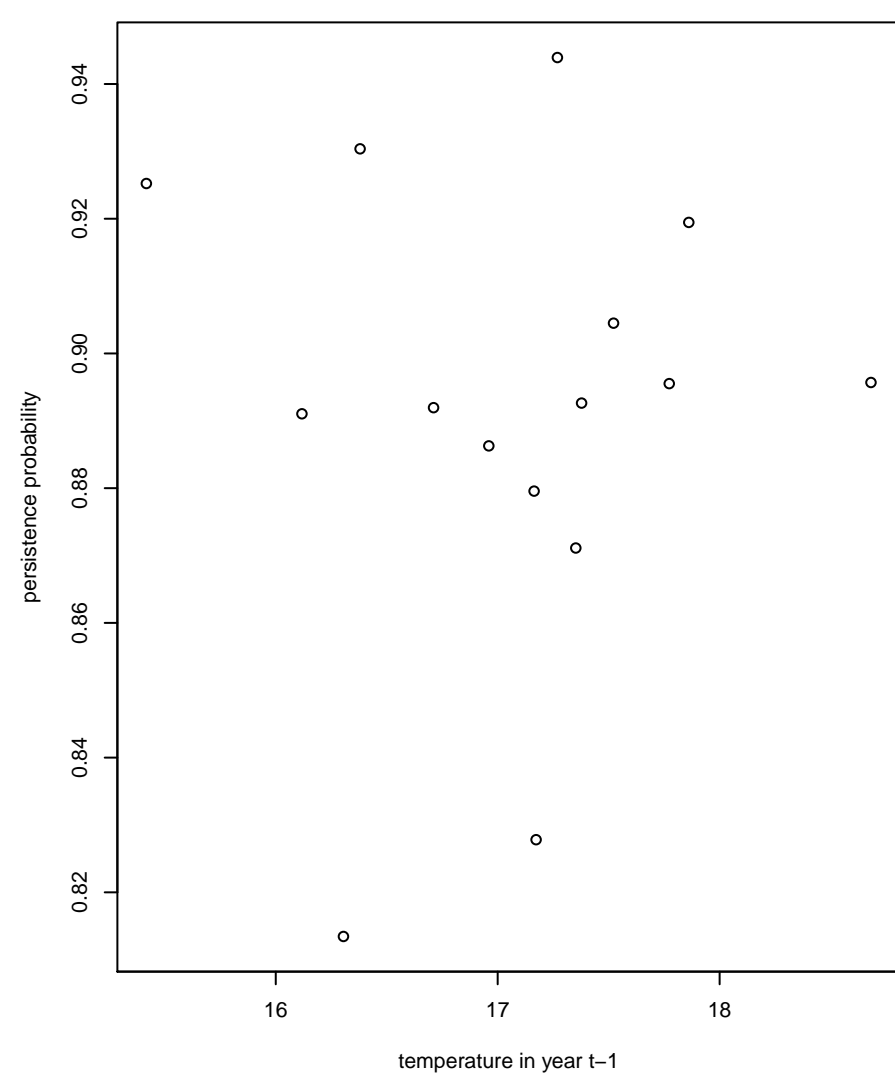

**Sympetrum sanguineum**

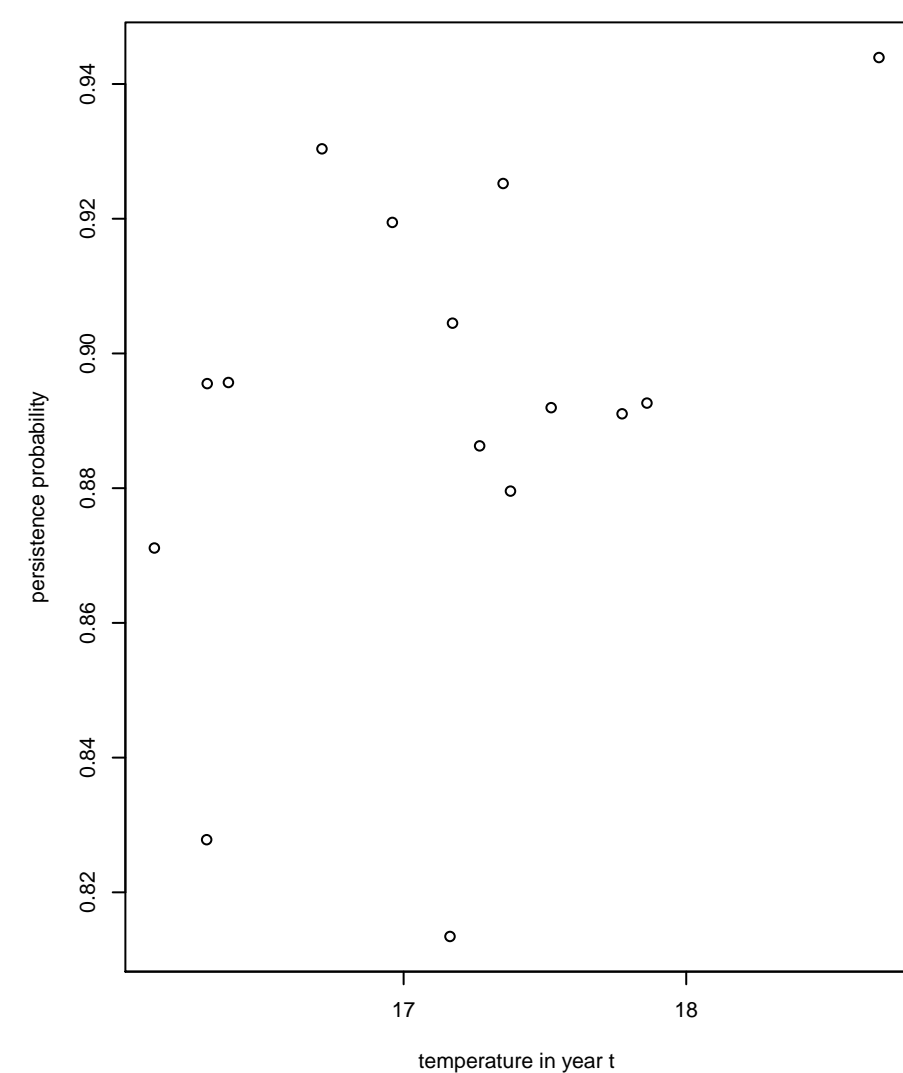



**Lestes viridis**

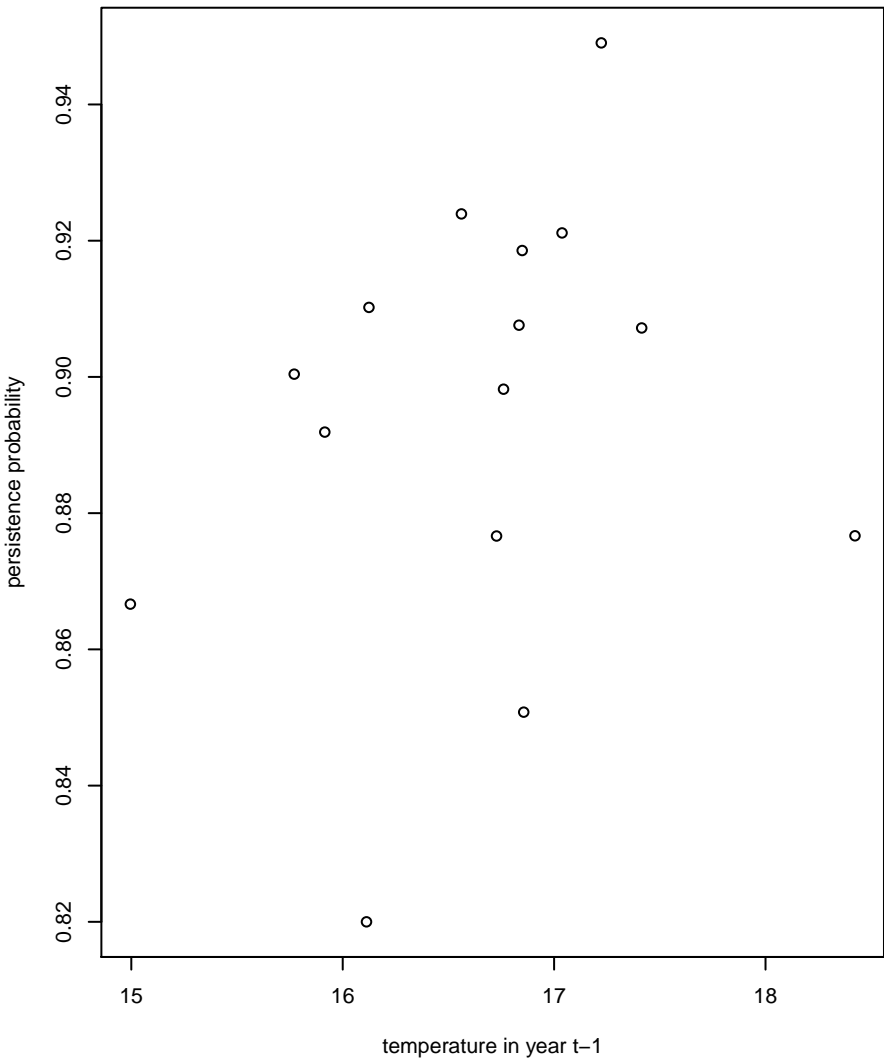

**Lestes viridis**

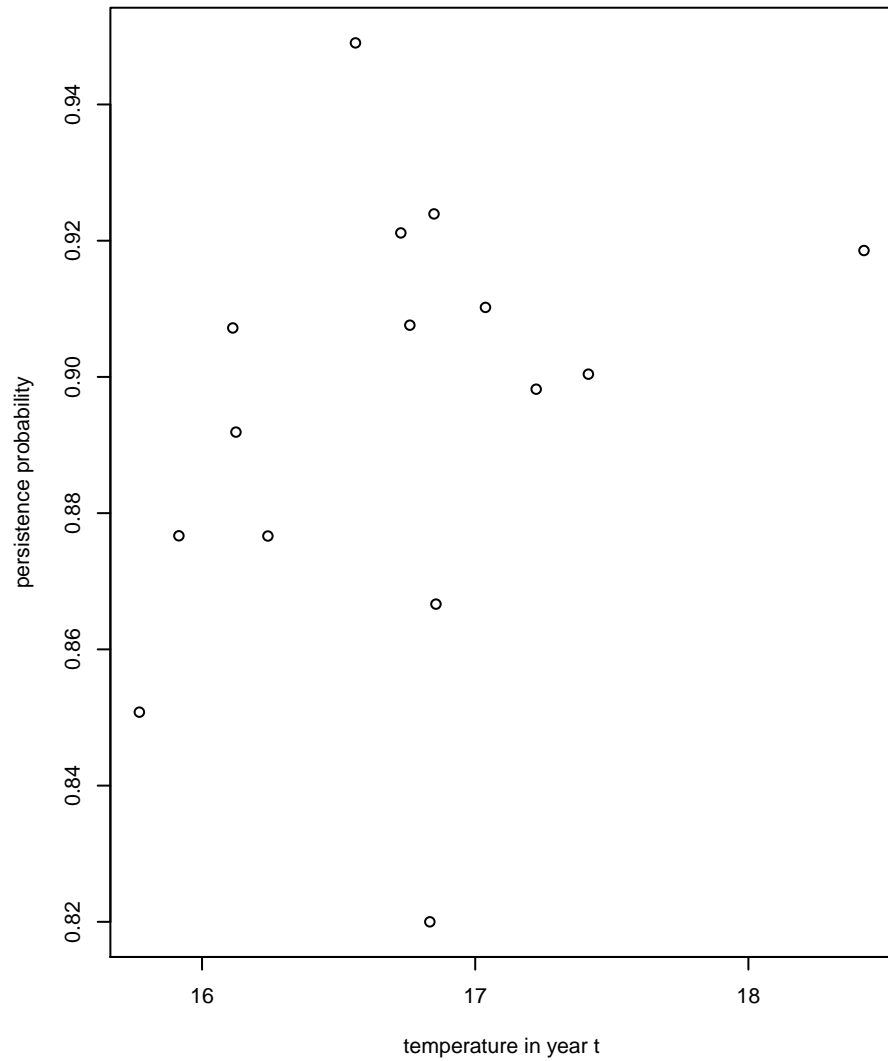

**Calopteryx splendens**

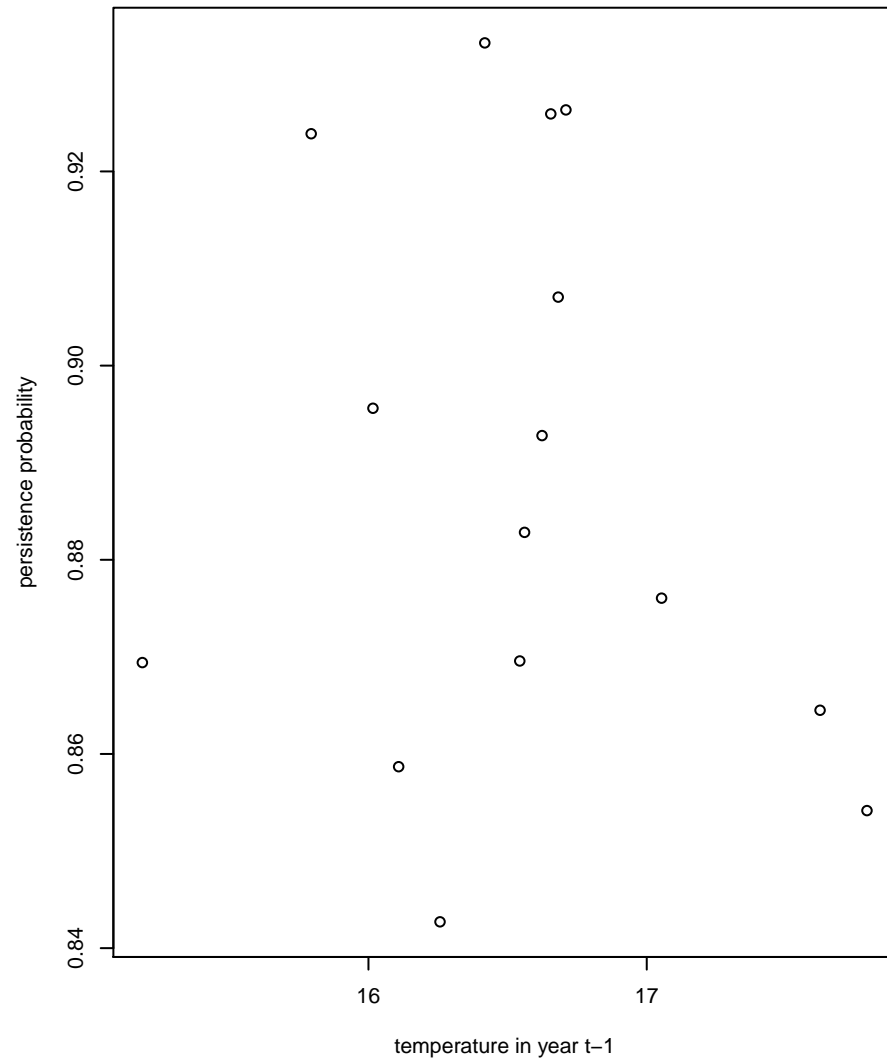

**Calopteryx splendens**

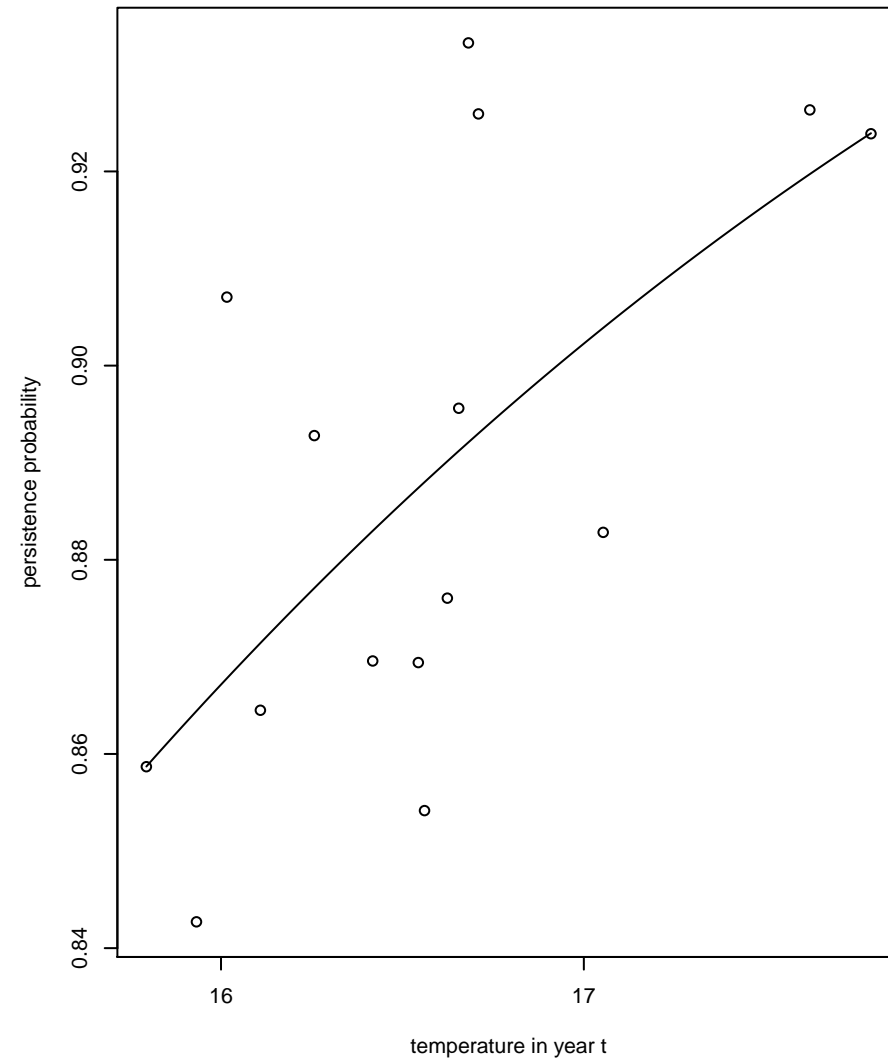

**Sympetrum danae**

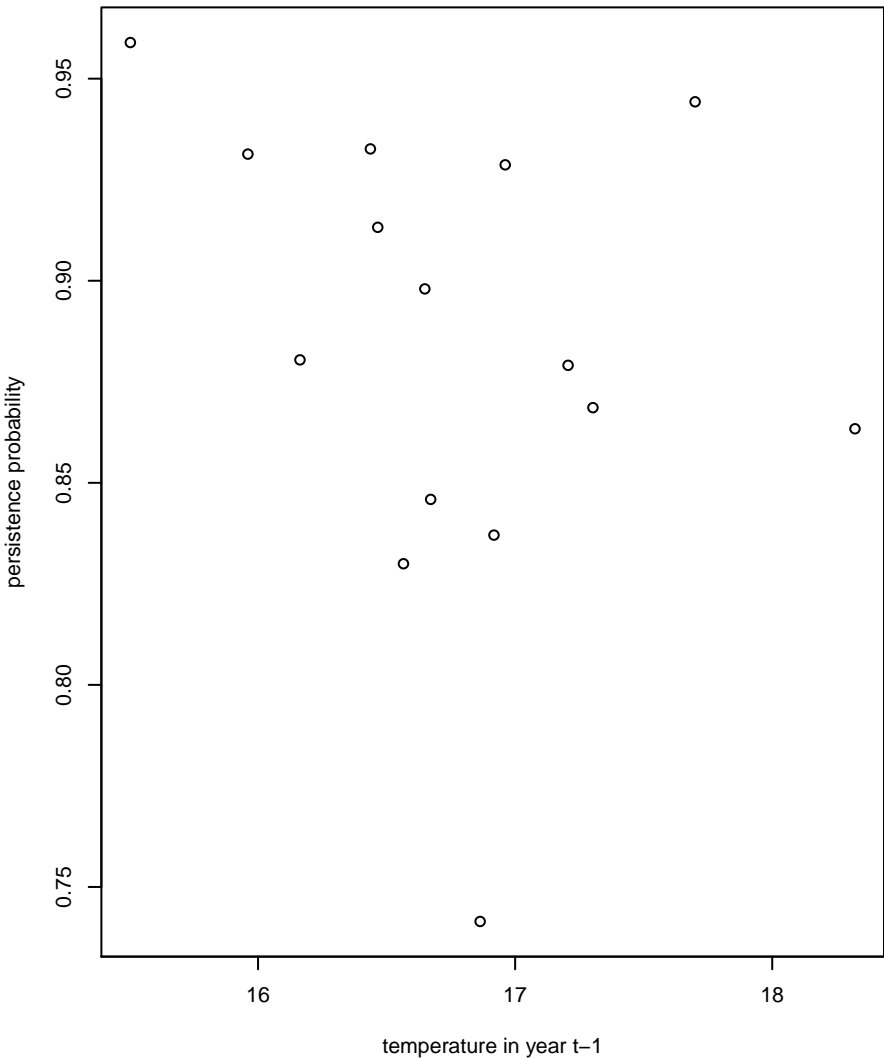

**Sympetrum danae**

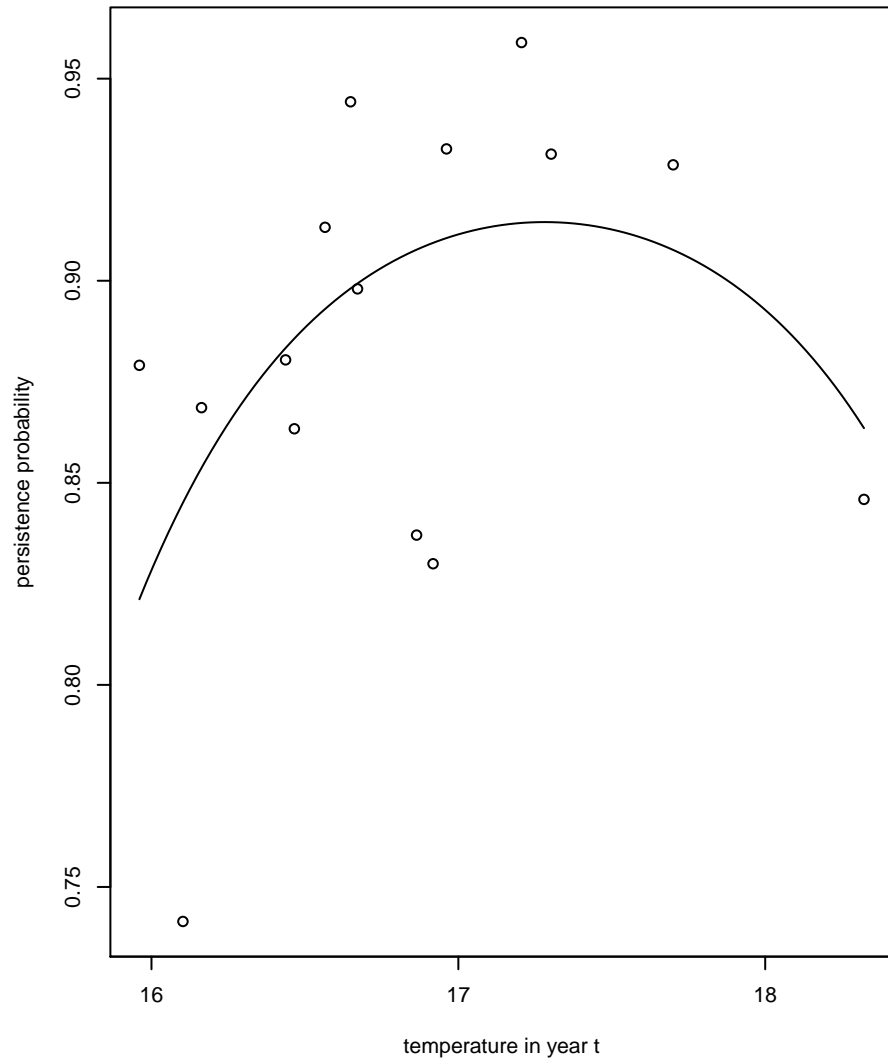

**Leucorrhinia rubicunda**

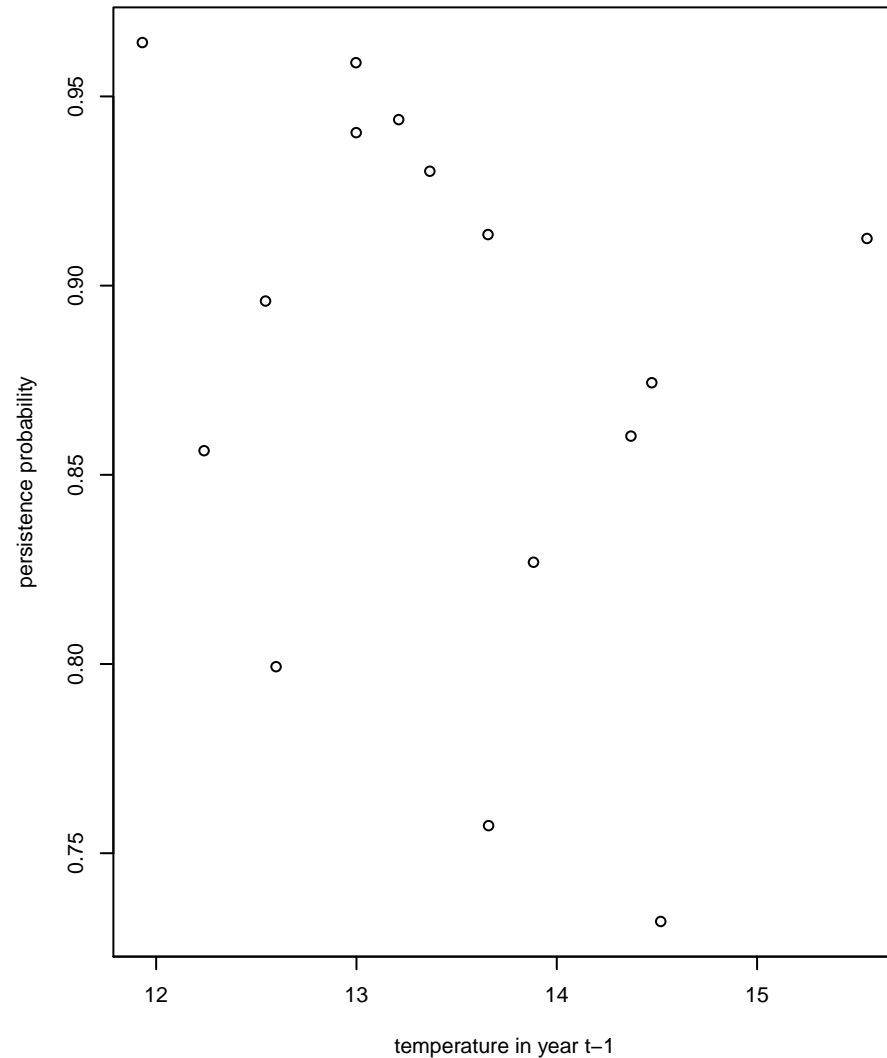

**Leucorrhinia rubicunda**

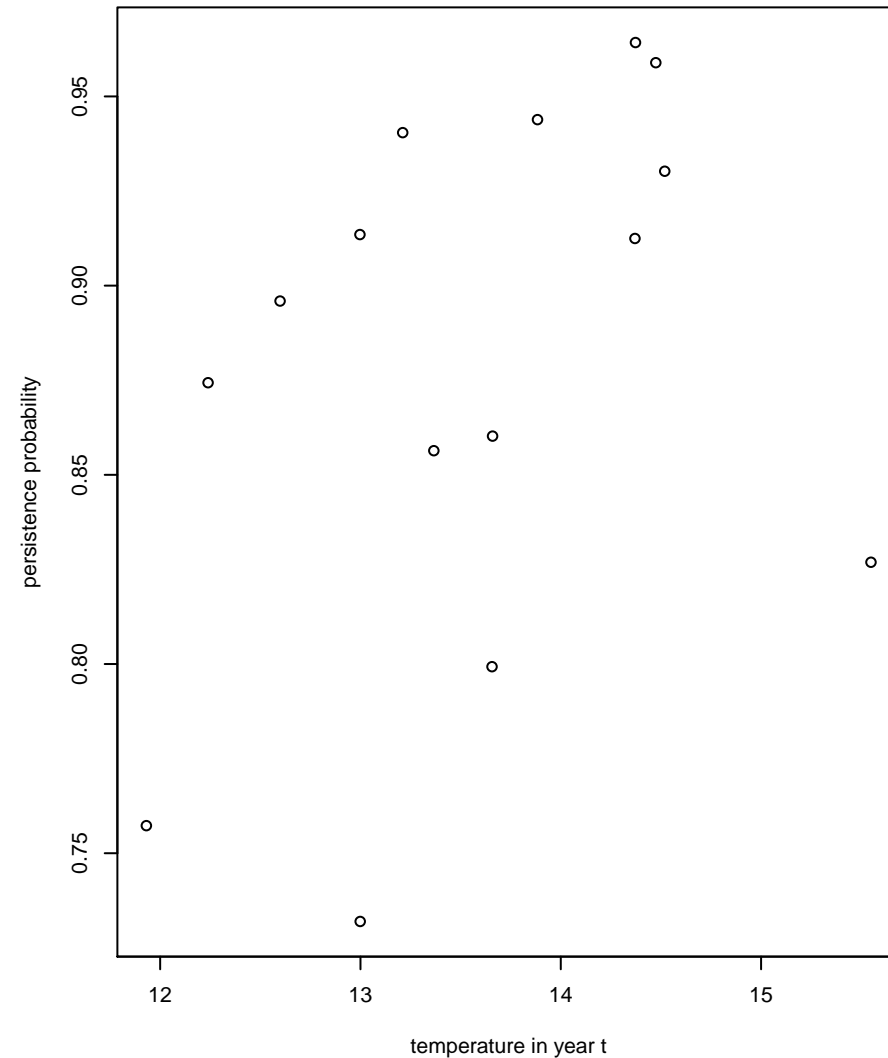

**Enallagma cyathigerum**

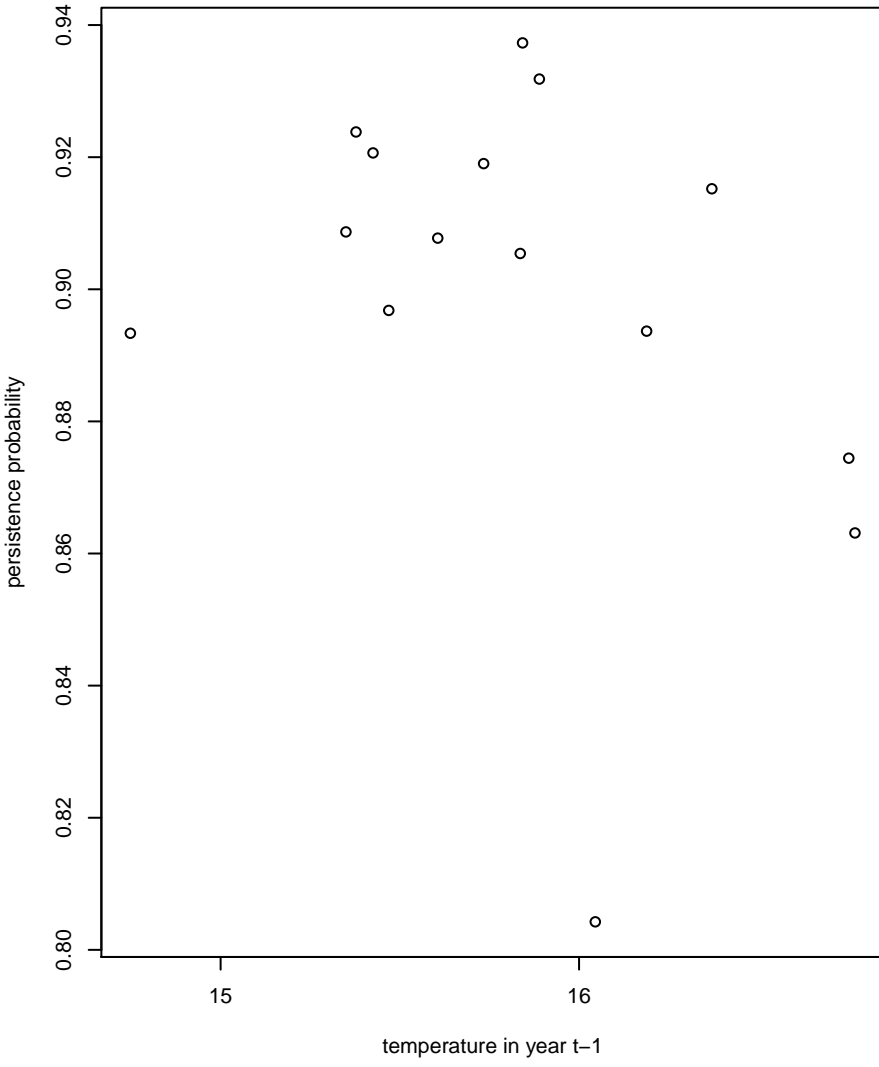

**Enallagma cyathigerum**

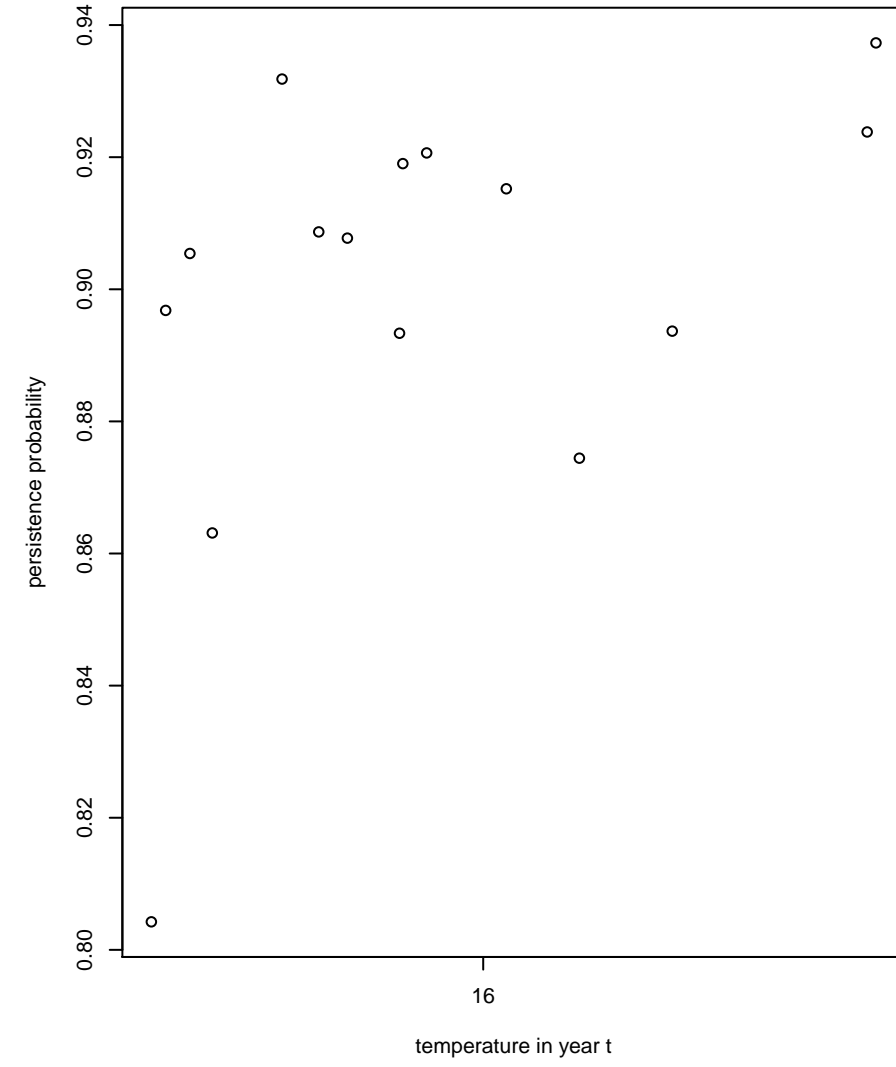

**Calopteryx virgo**

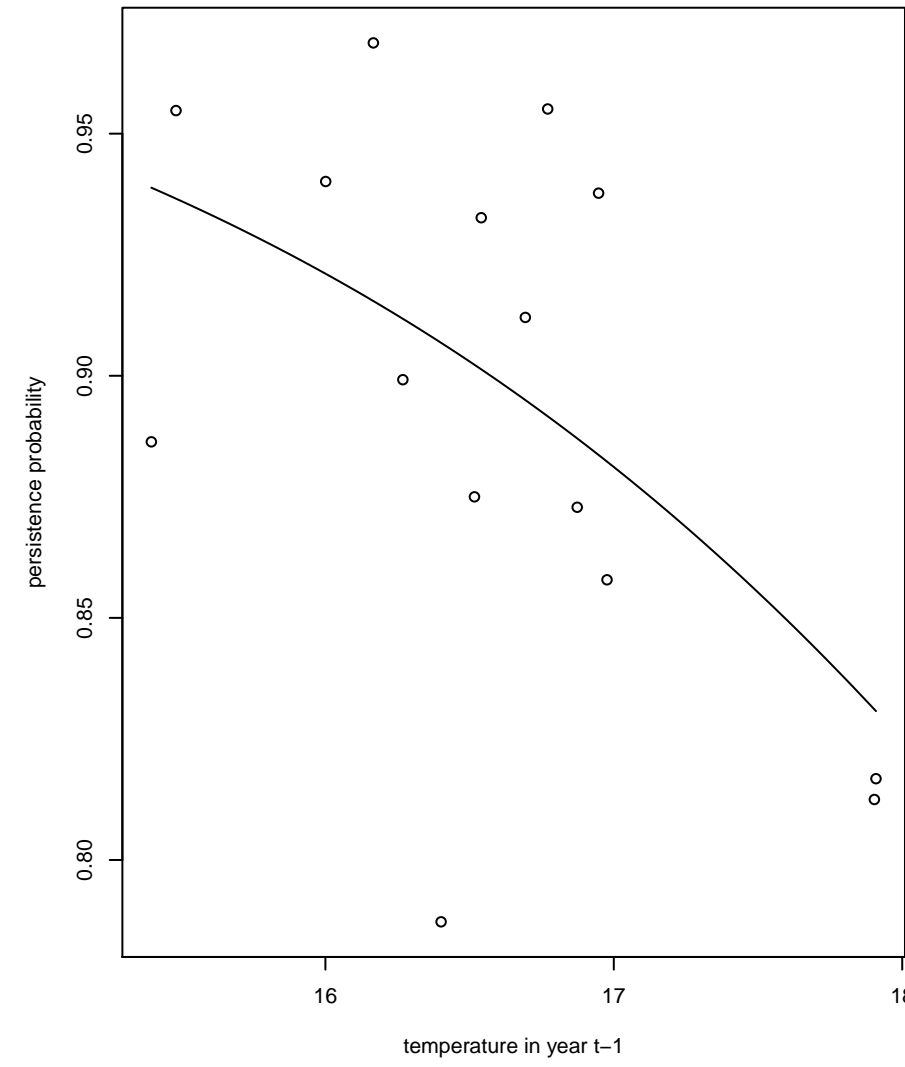

**Calopteryx virgo**

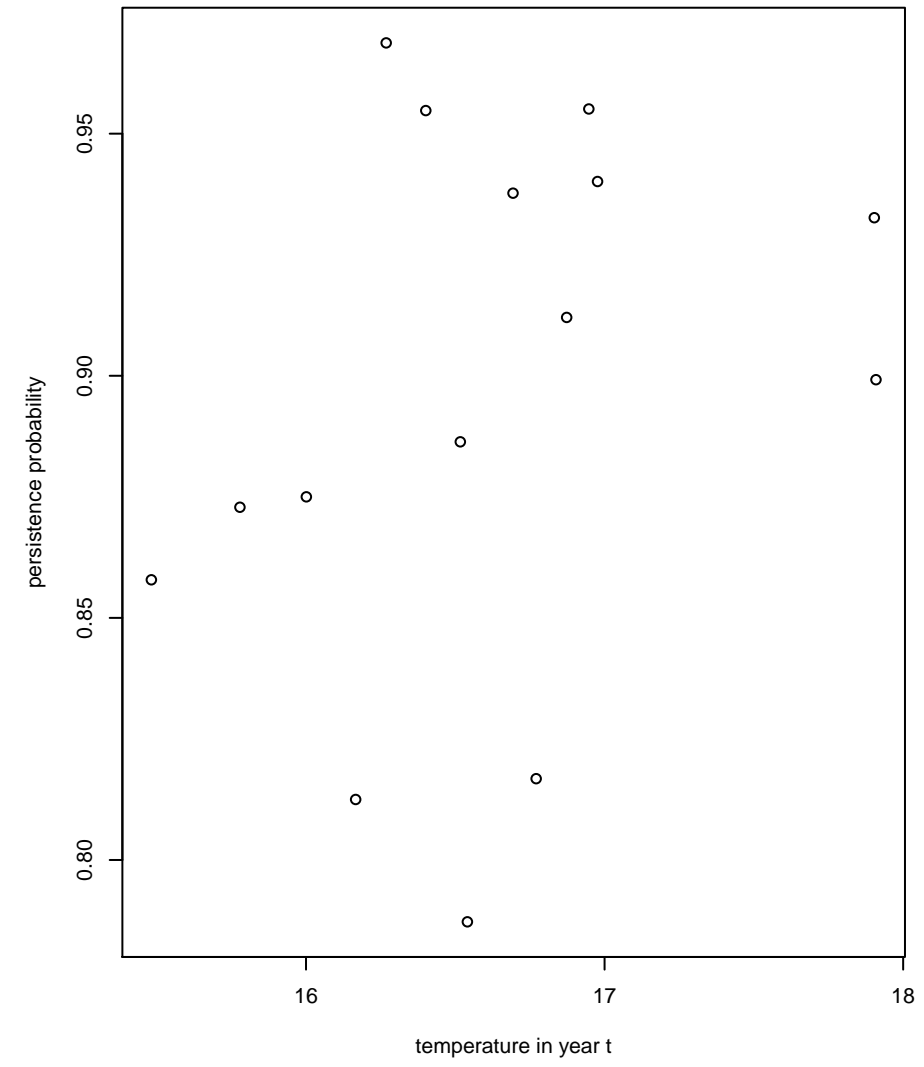

**Ischnura pumilio**

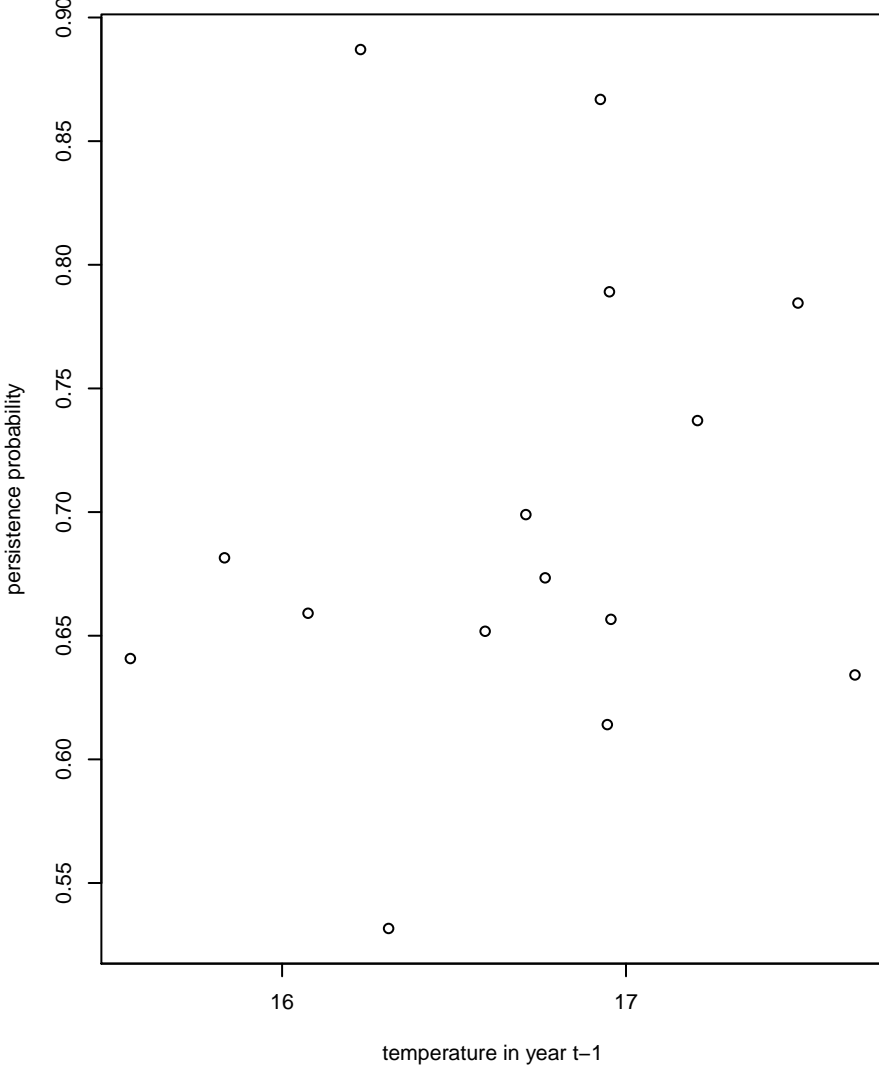

**Ischnura pumilio**

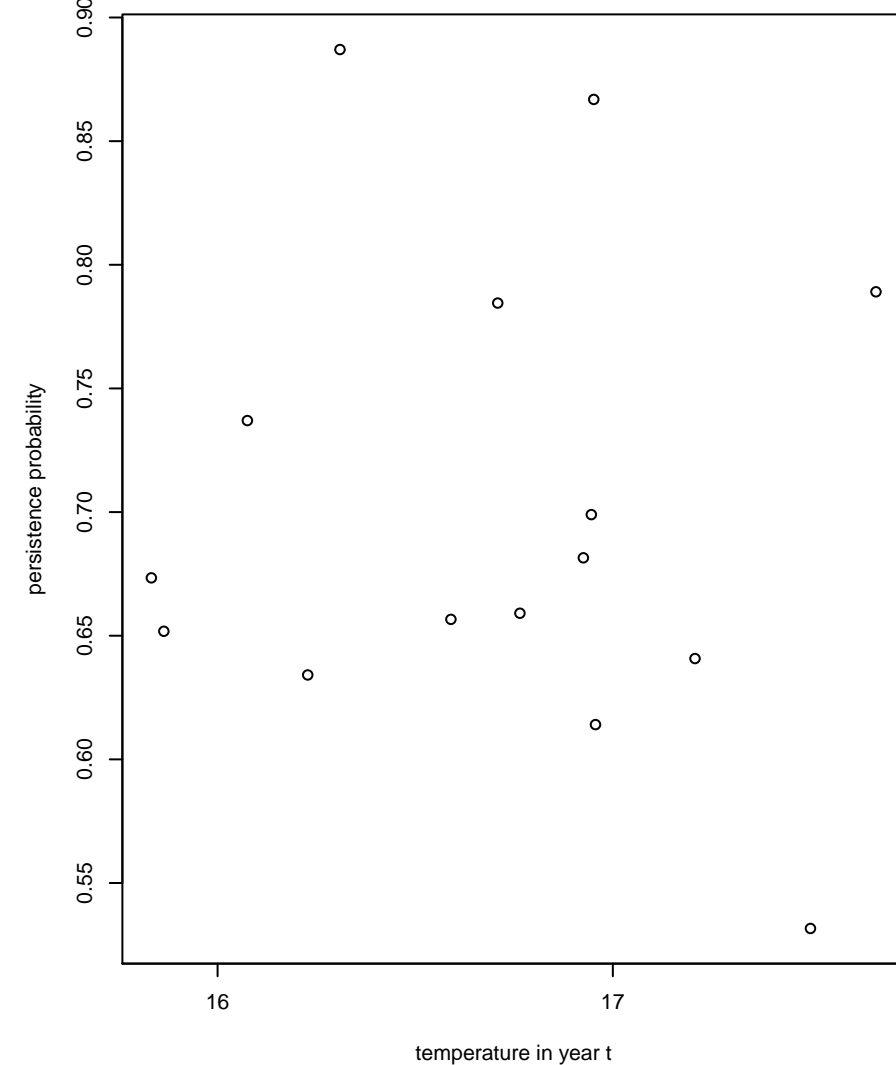

**Aeshna isocetes**

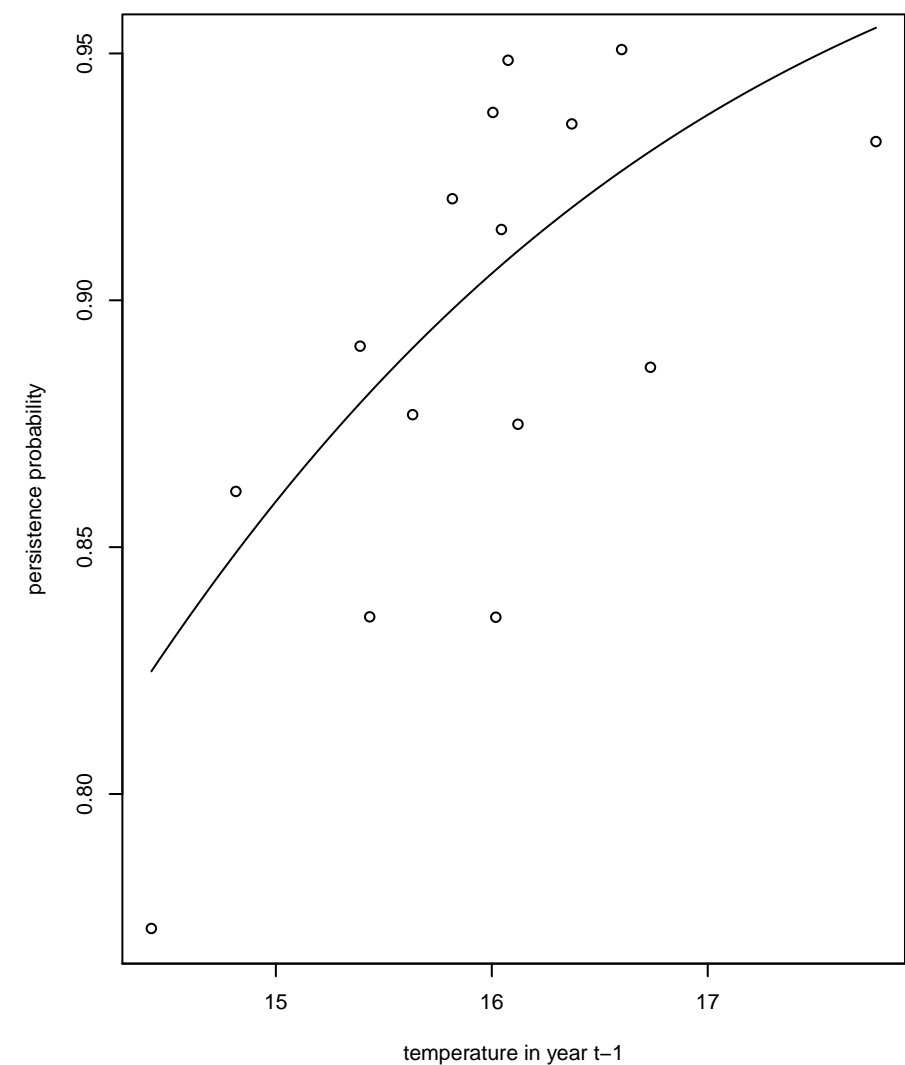

**Aeshna isocetes**

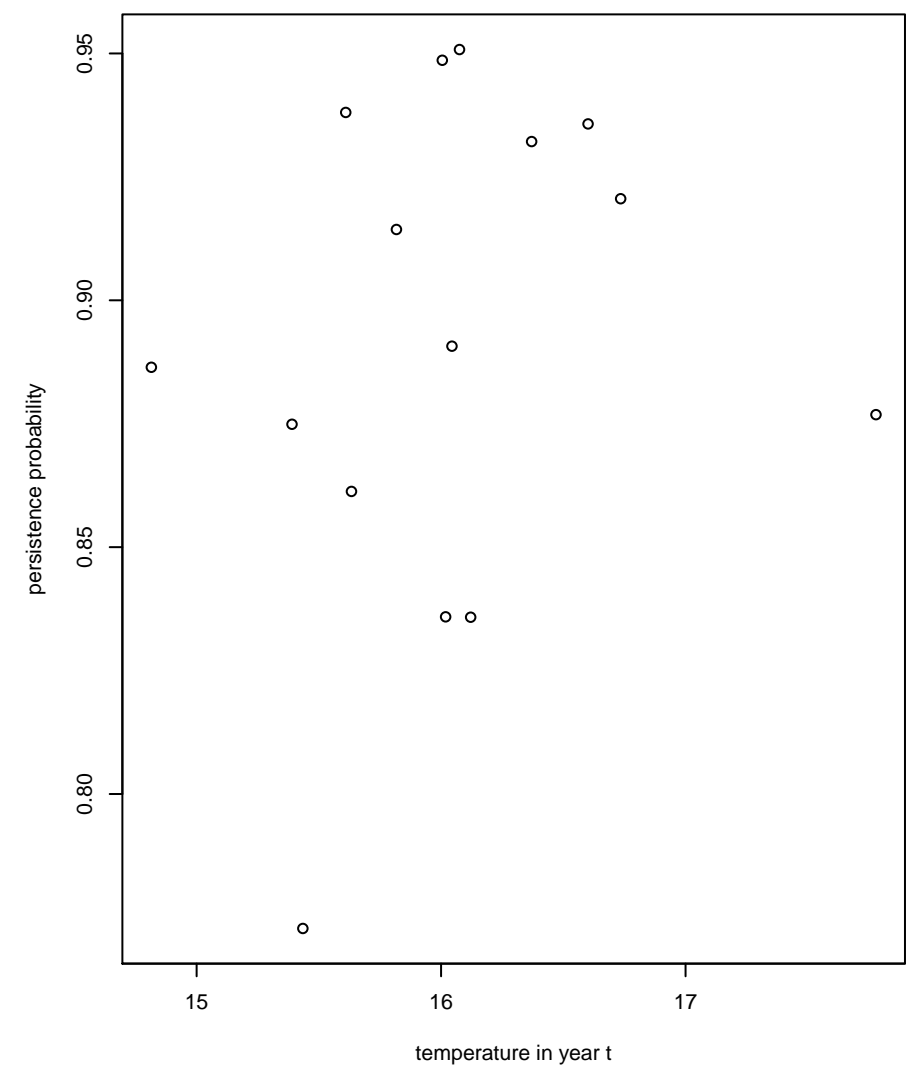

**Leucorrhinia dubia**

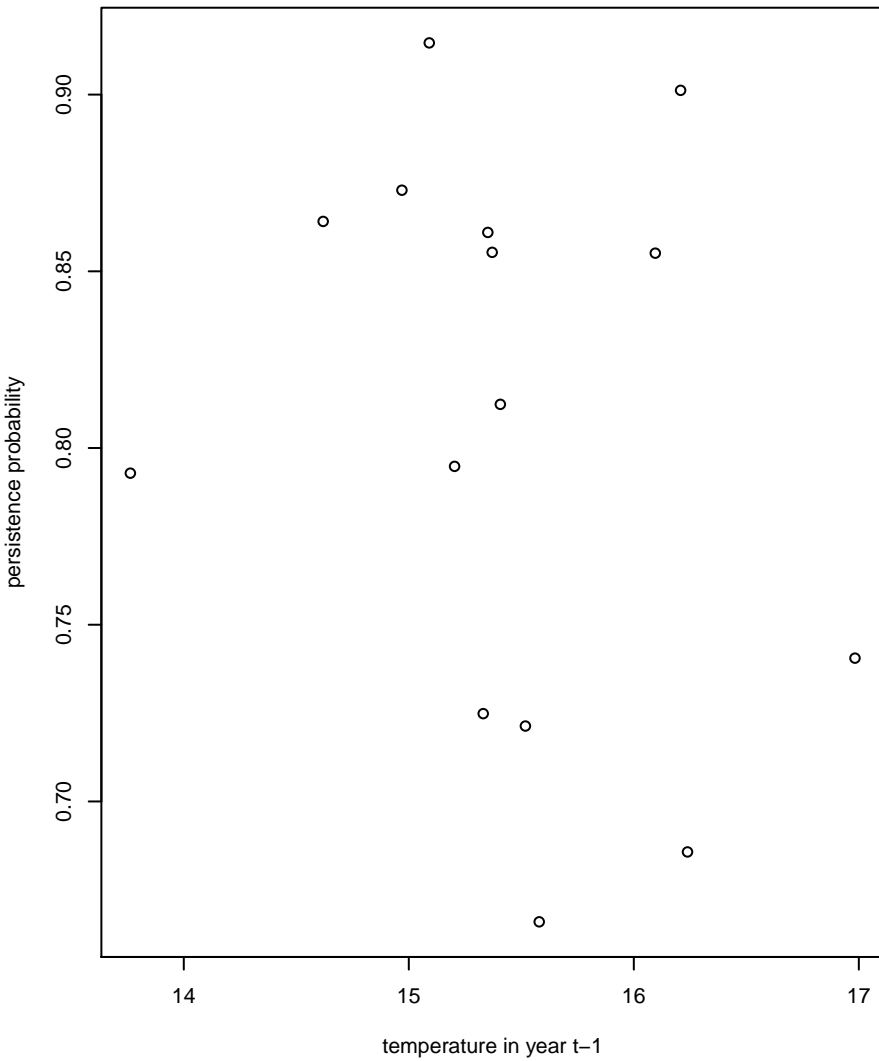

**Leucorrhinia dubia**

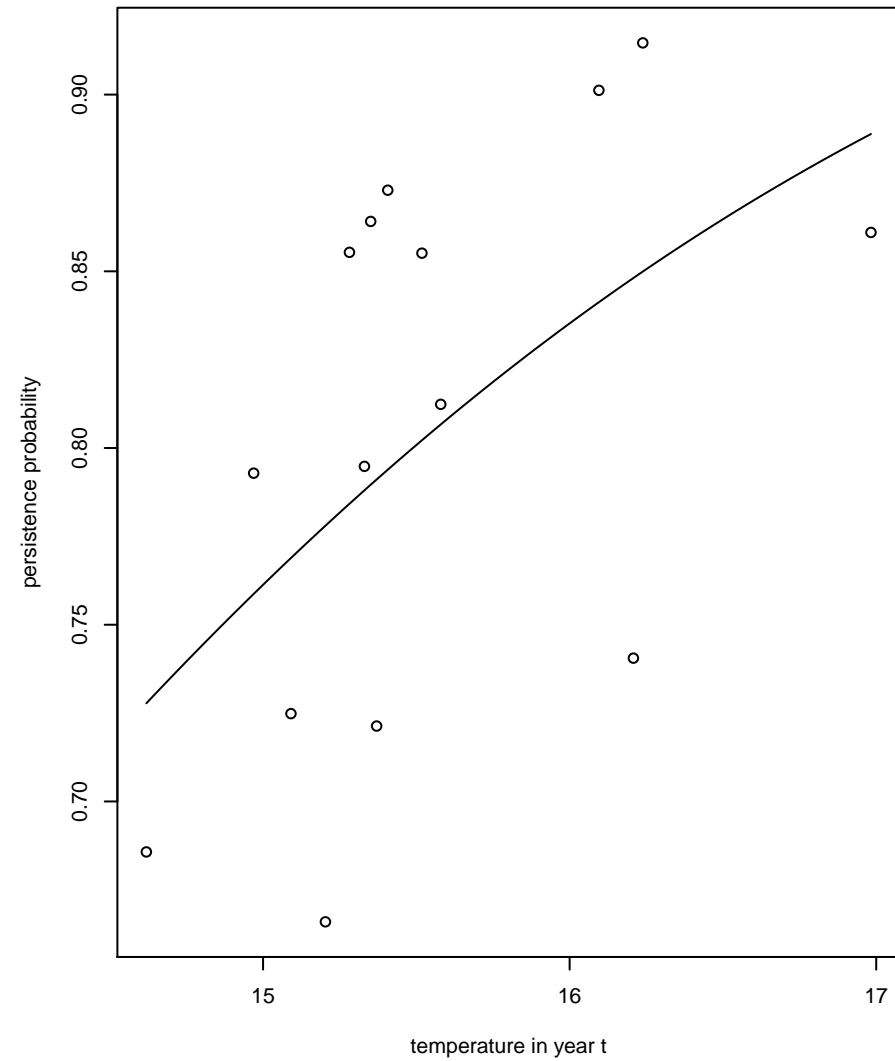

**Aeshna grandis**

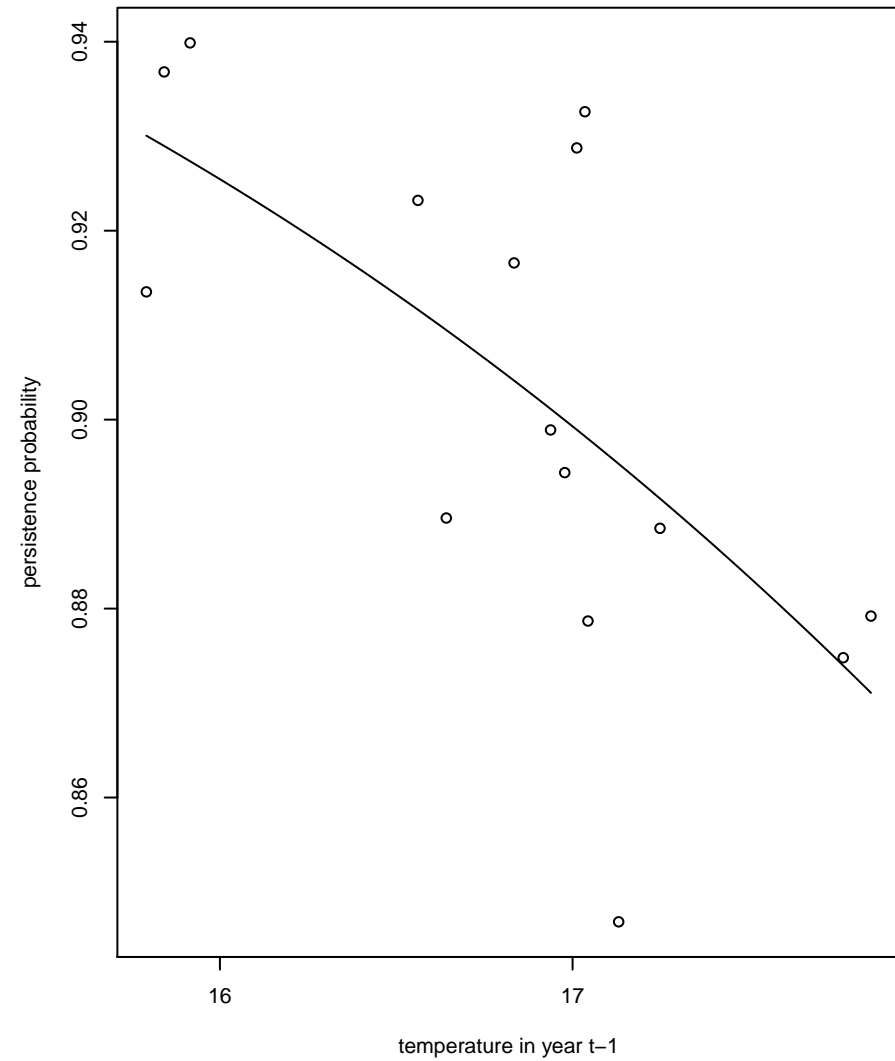

**Aeshna grandis**

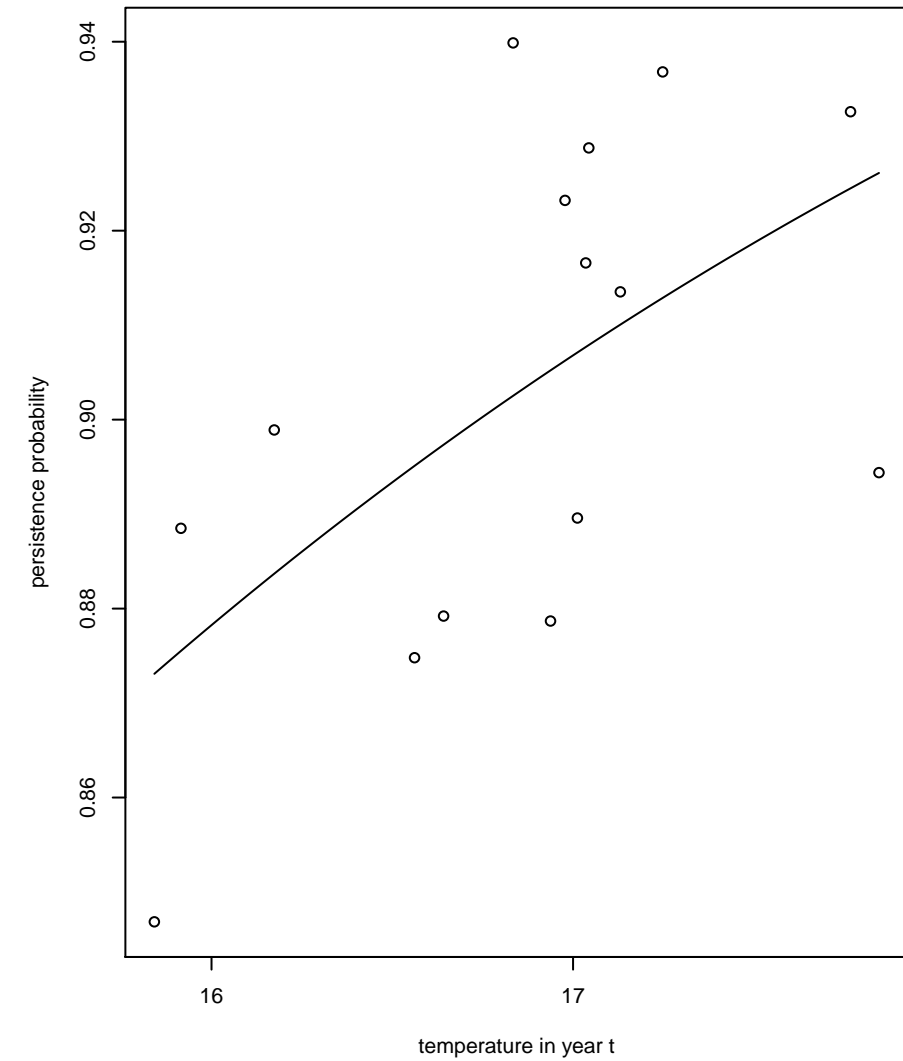

**Aeshna cyanea**

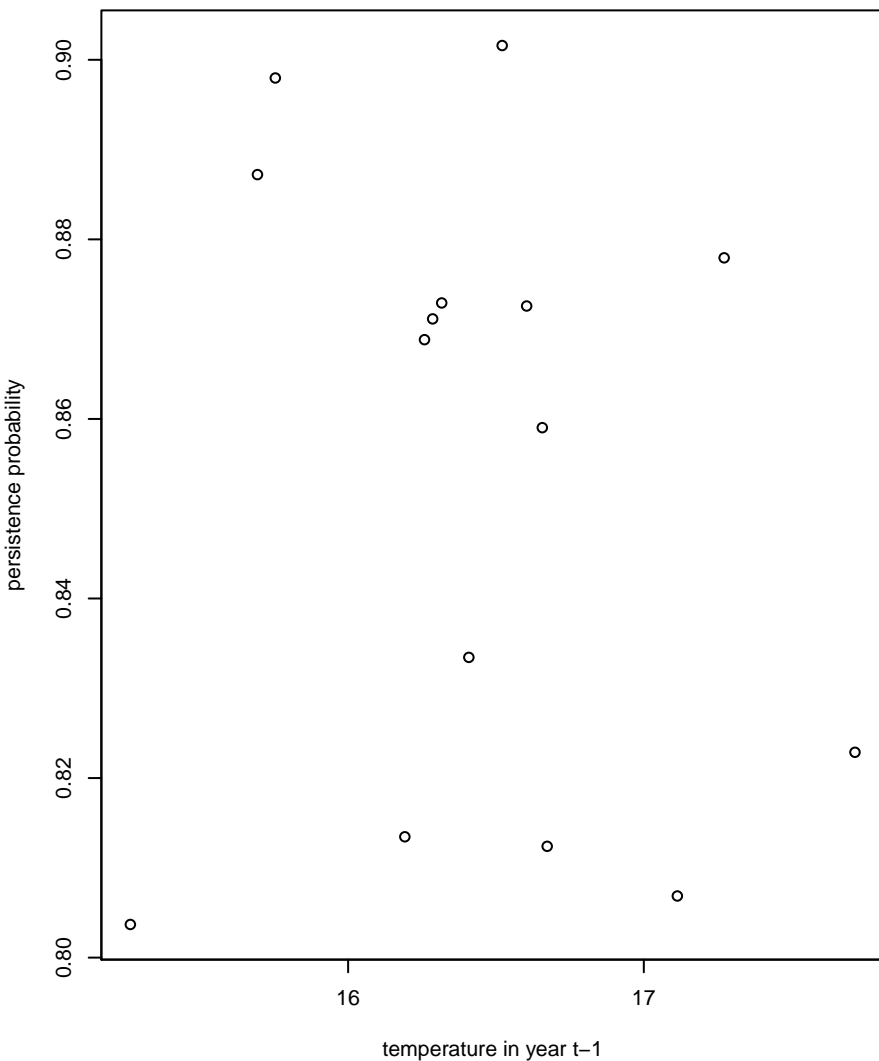

**Aeshna cyanea**

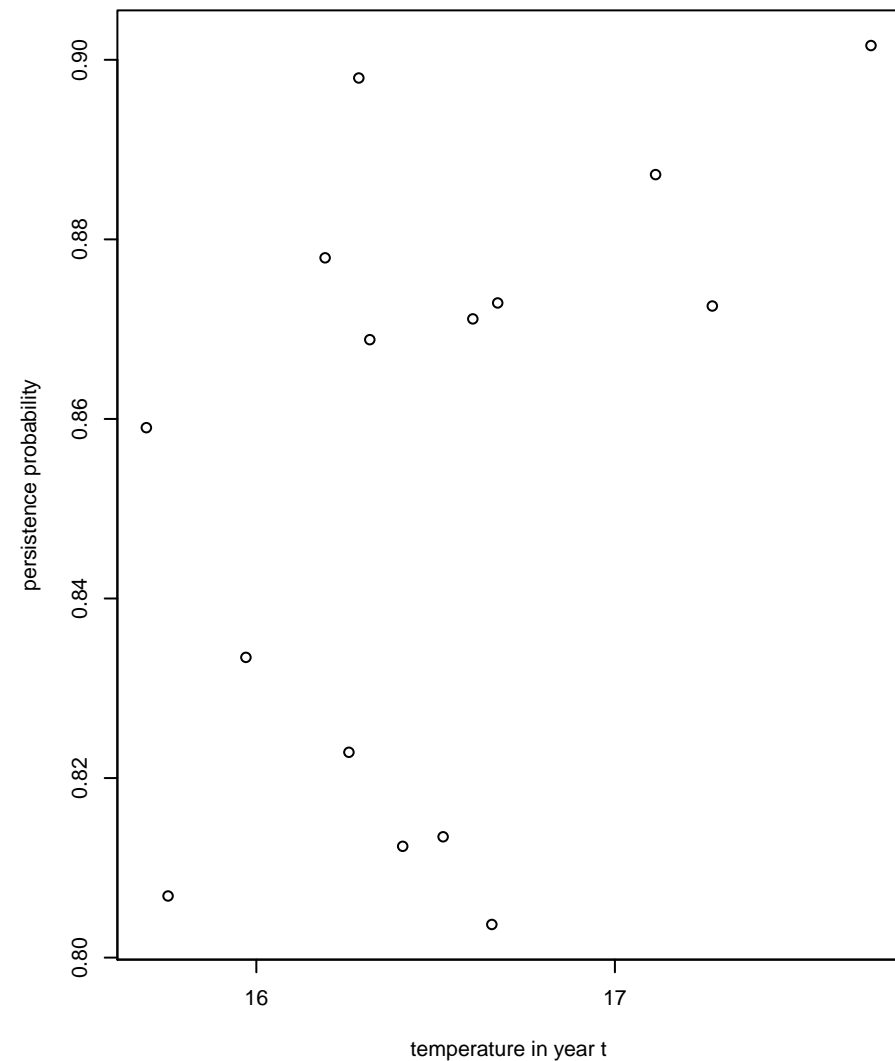

**Lestes virens**

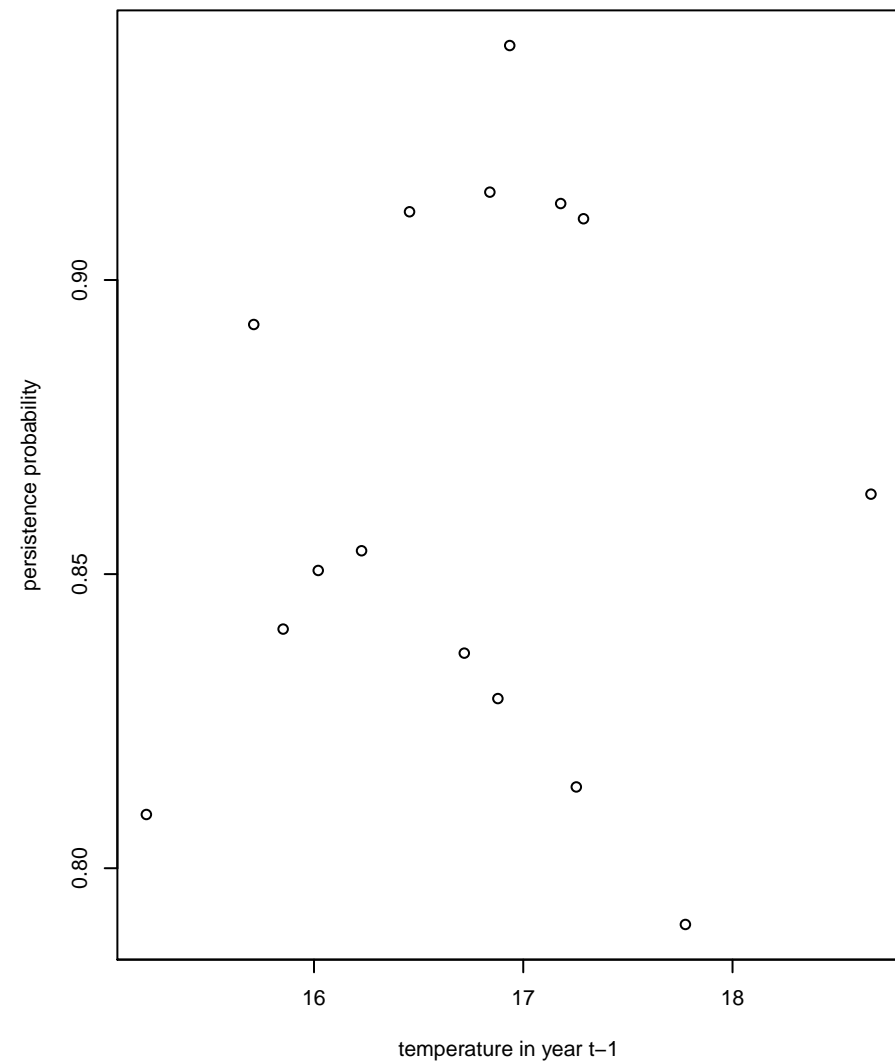

**Lestes virens**

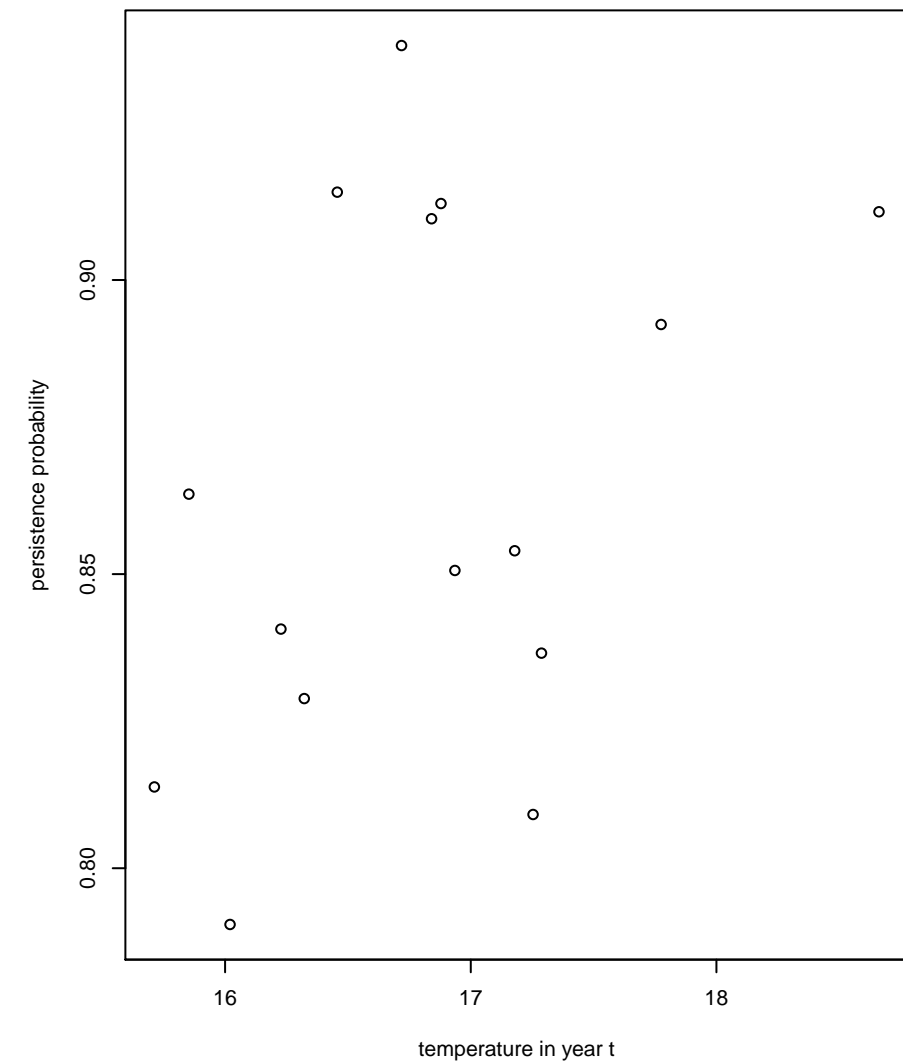

**Libellula depressa**

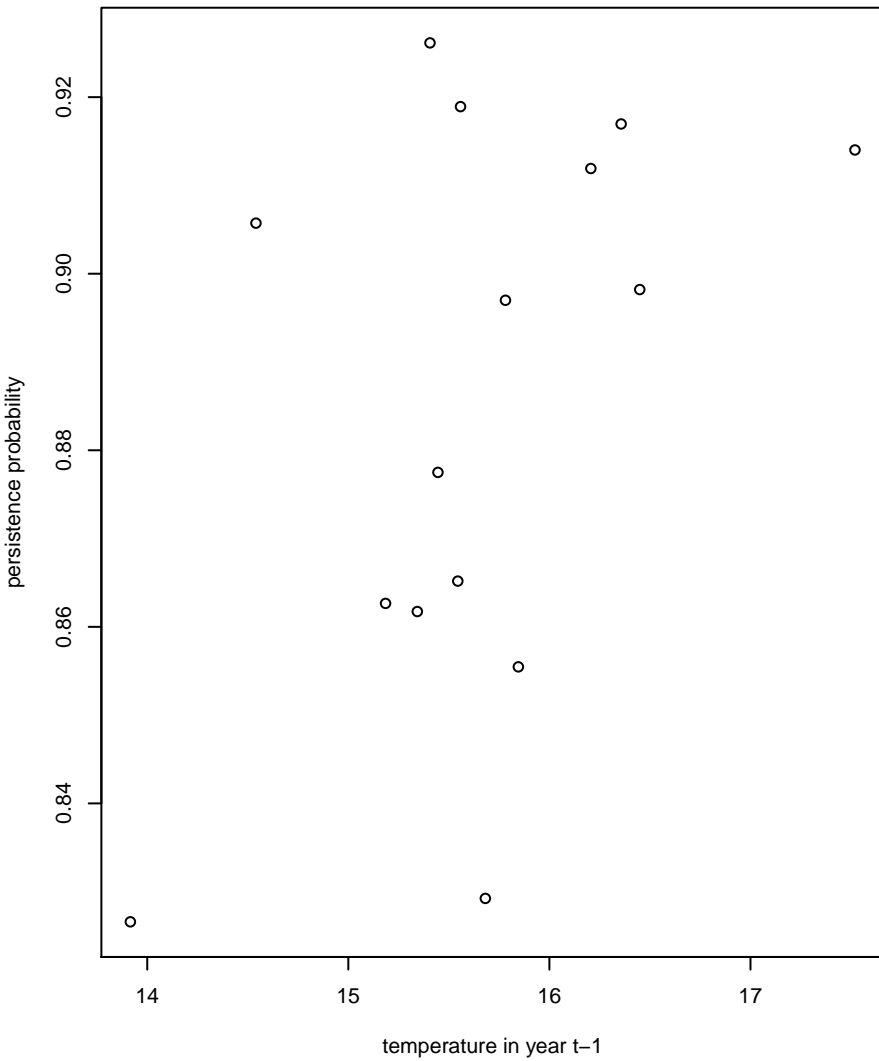

**Libellula depressa**

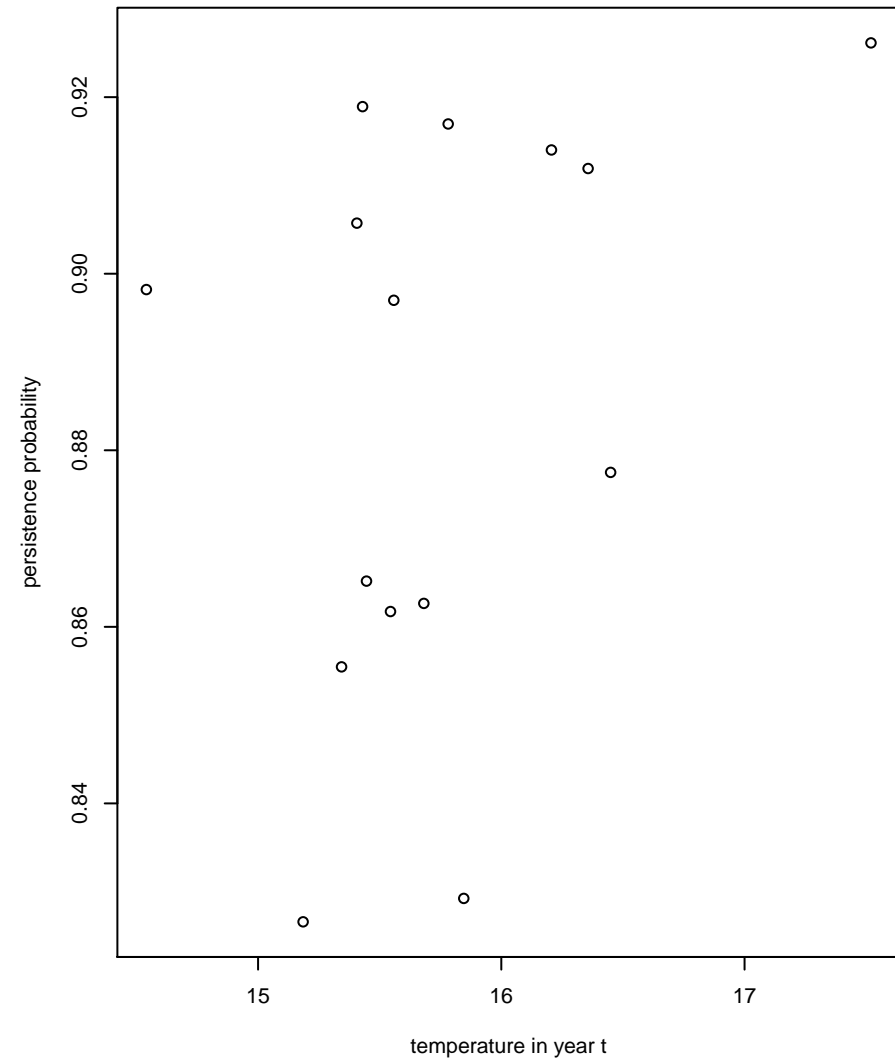

**Sympetrum striolatum**

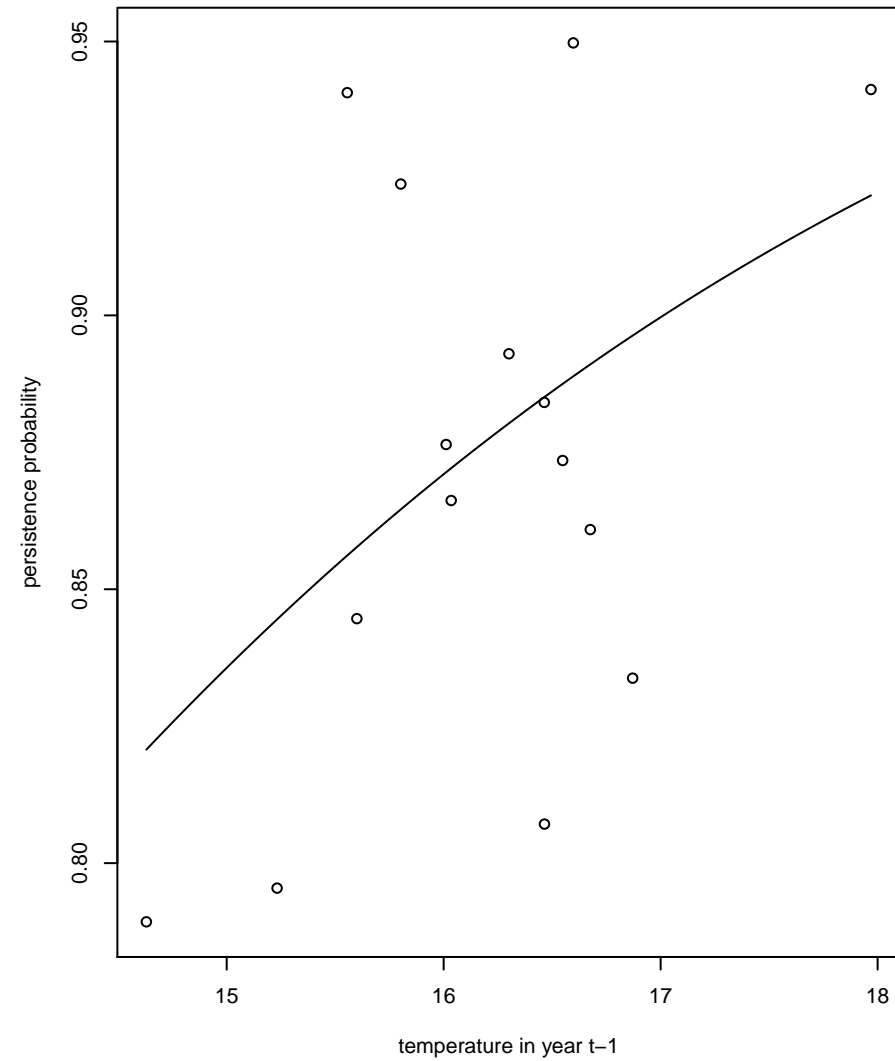

**Sympetrum striolatum**

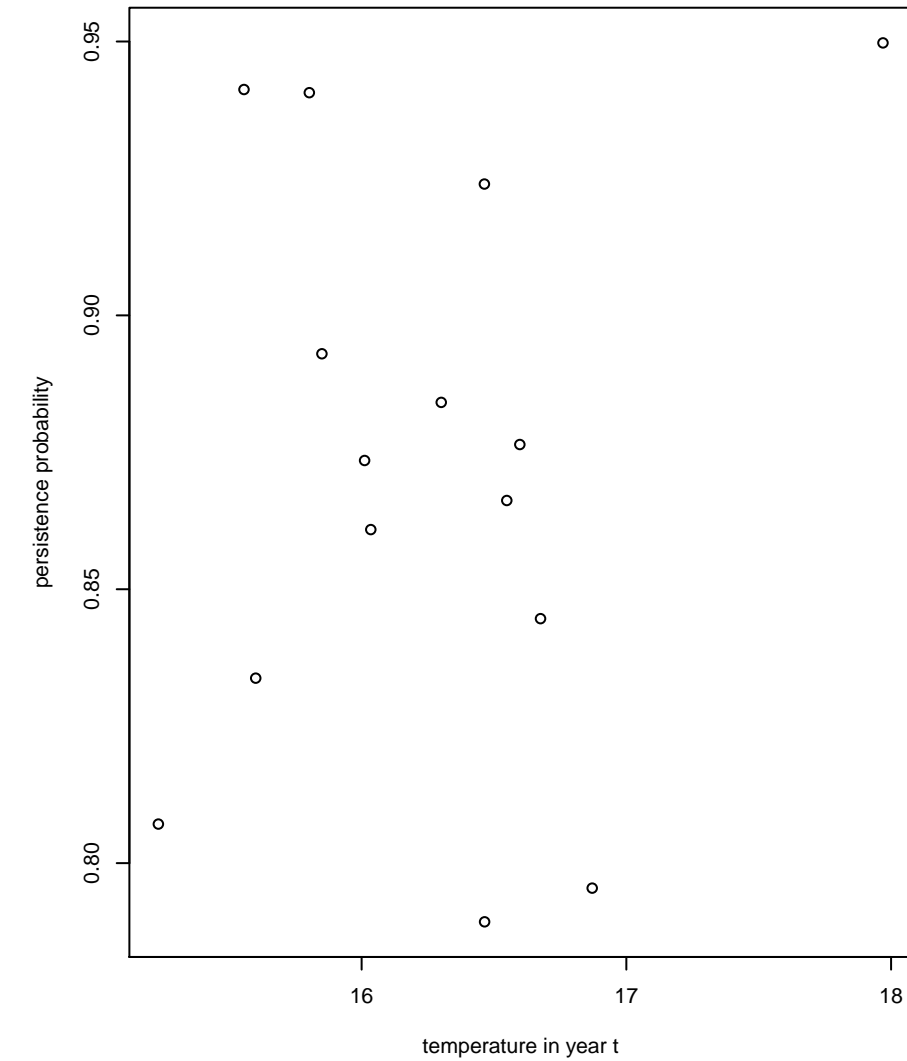

**Gomphus vulgatissimus**

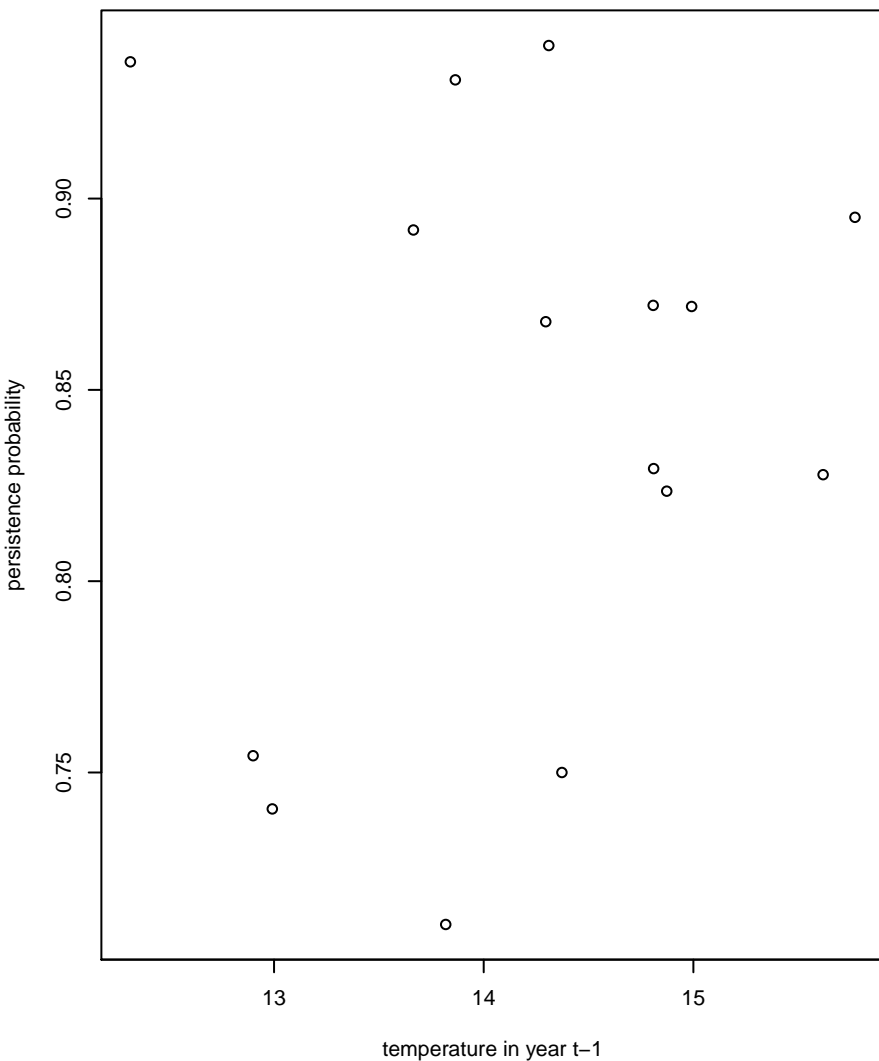

**Gomphus vulgatissimus**

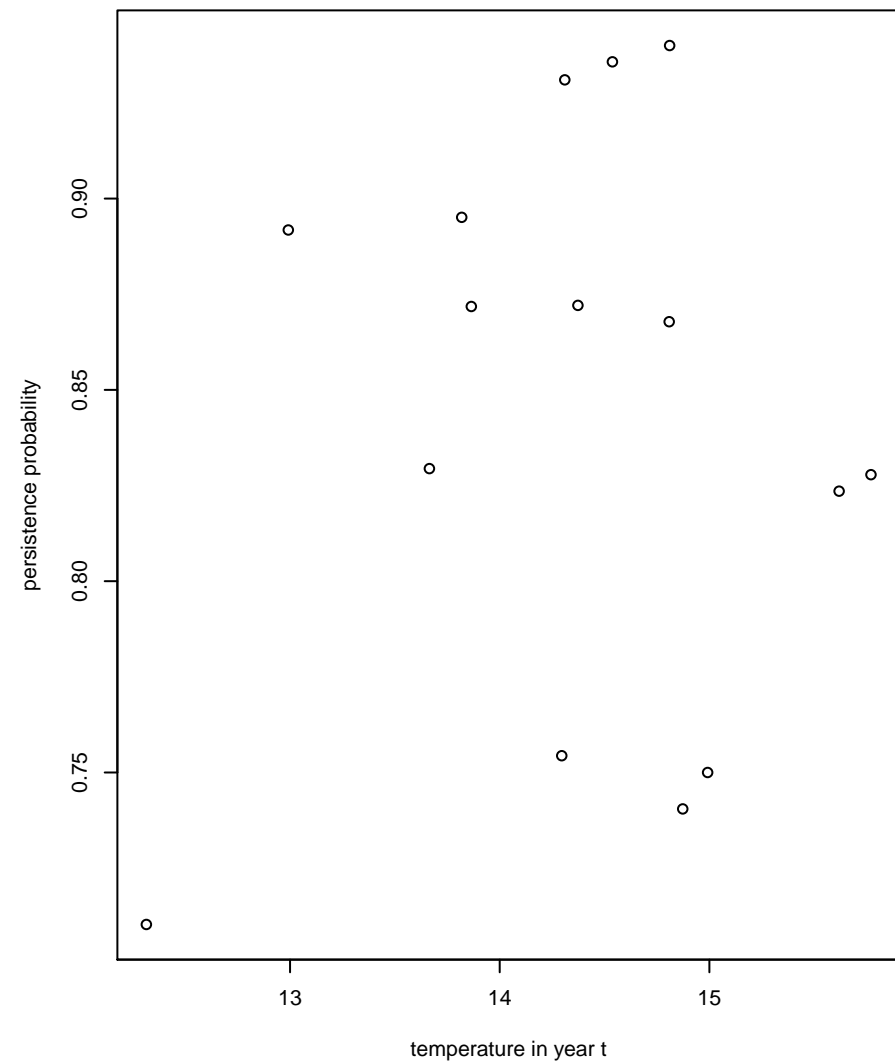

**Cordulia aenea**

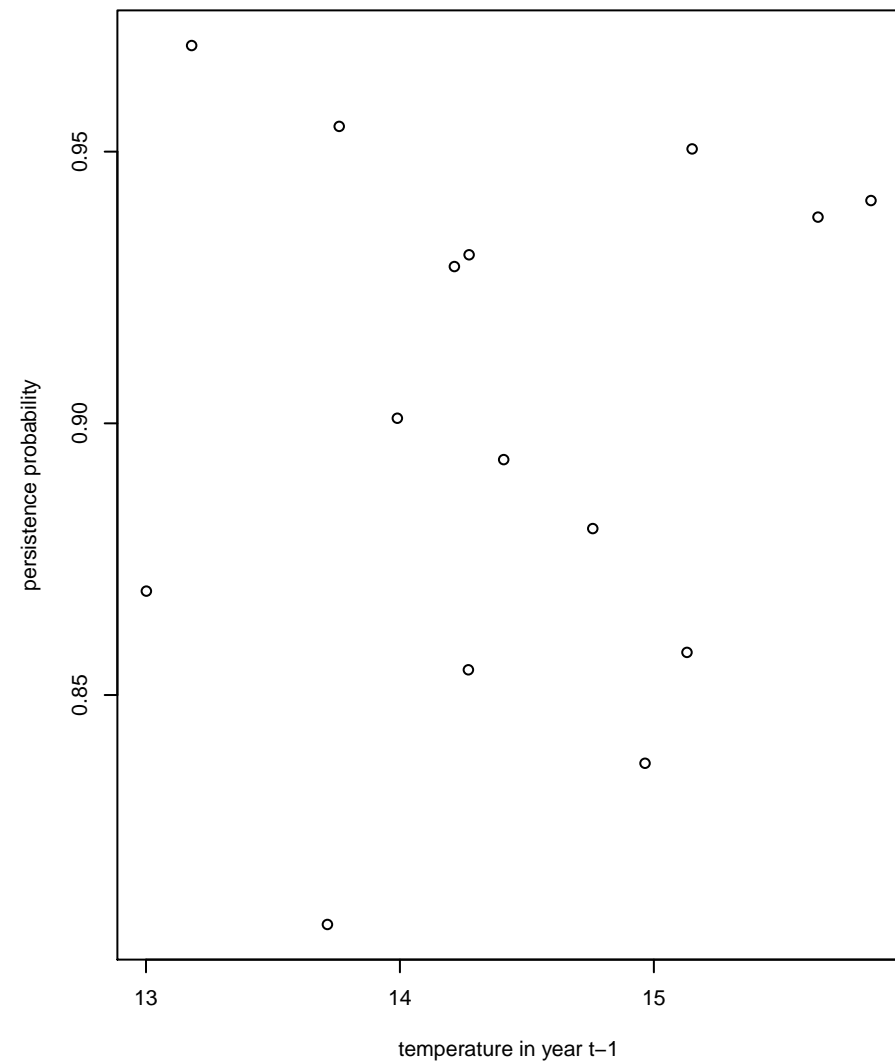

**Cordulia aenea**

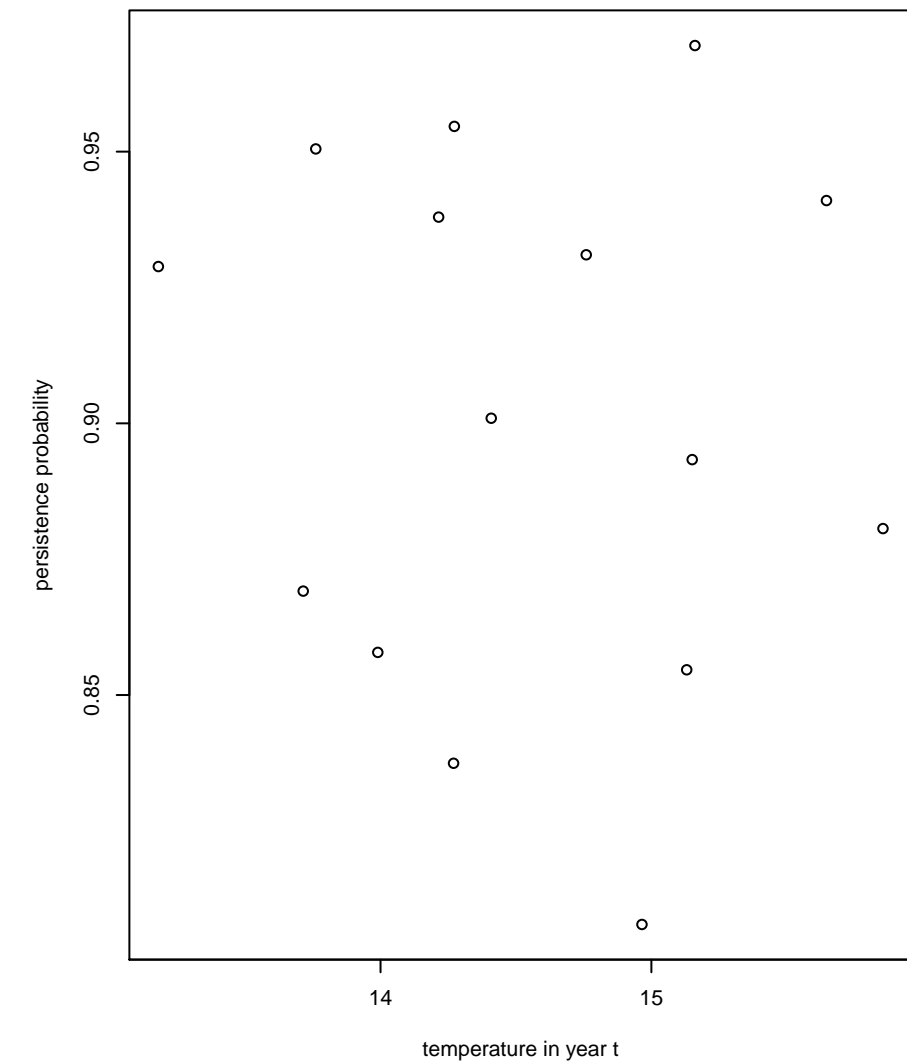

**Aeshna viridis**

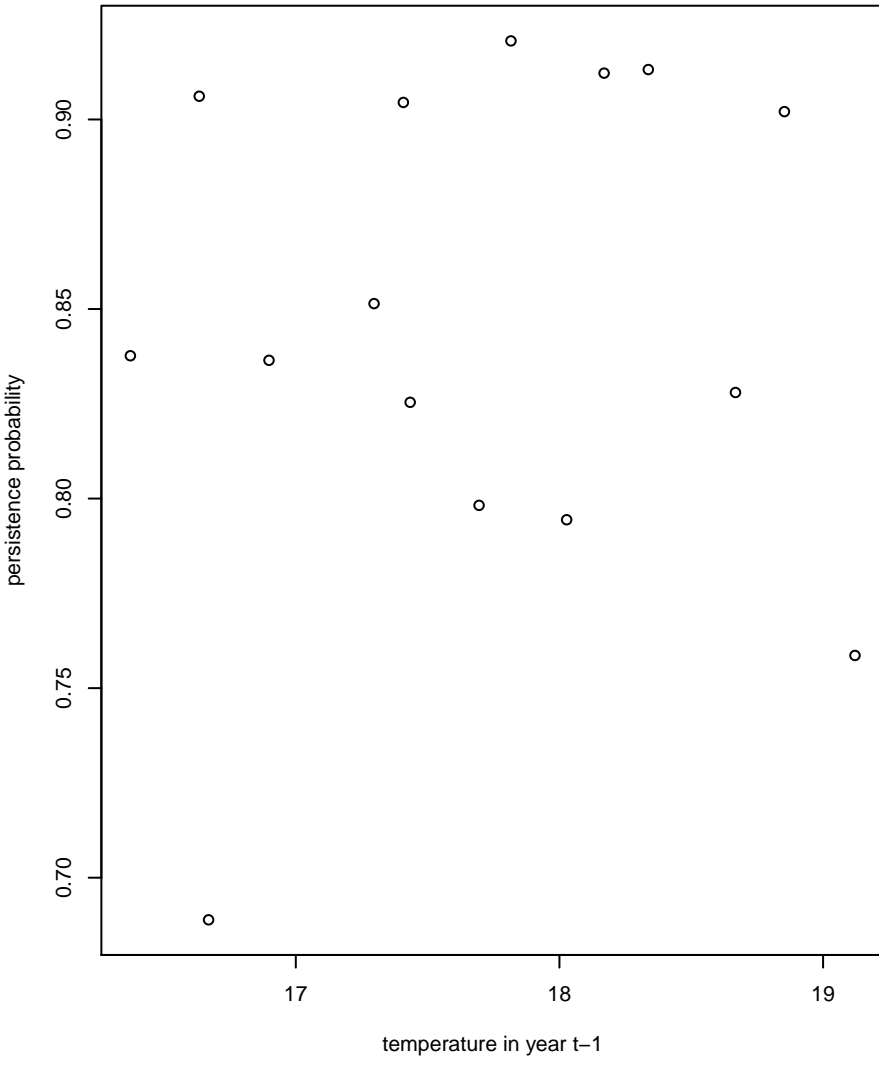

**Aeshna viridis**

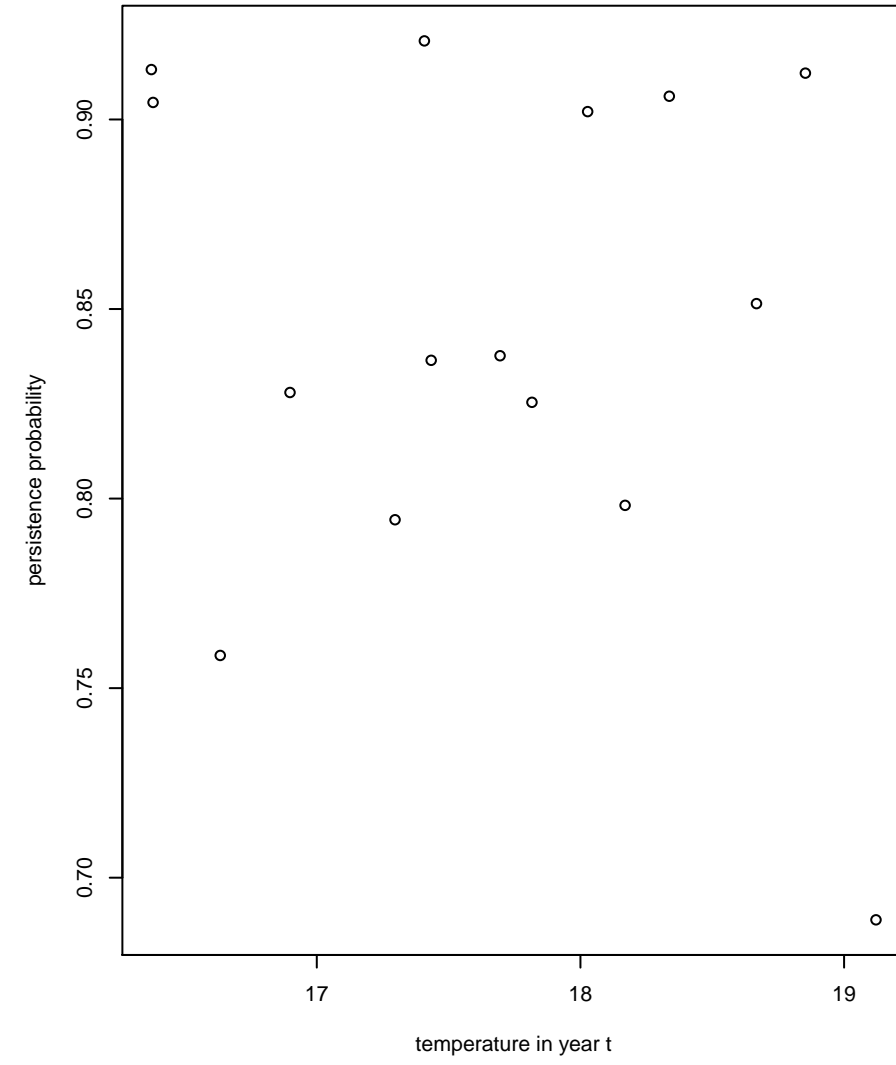

**Sympetrum flaveolum**

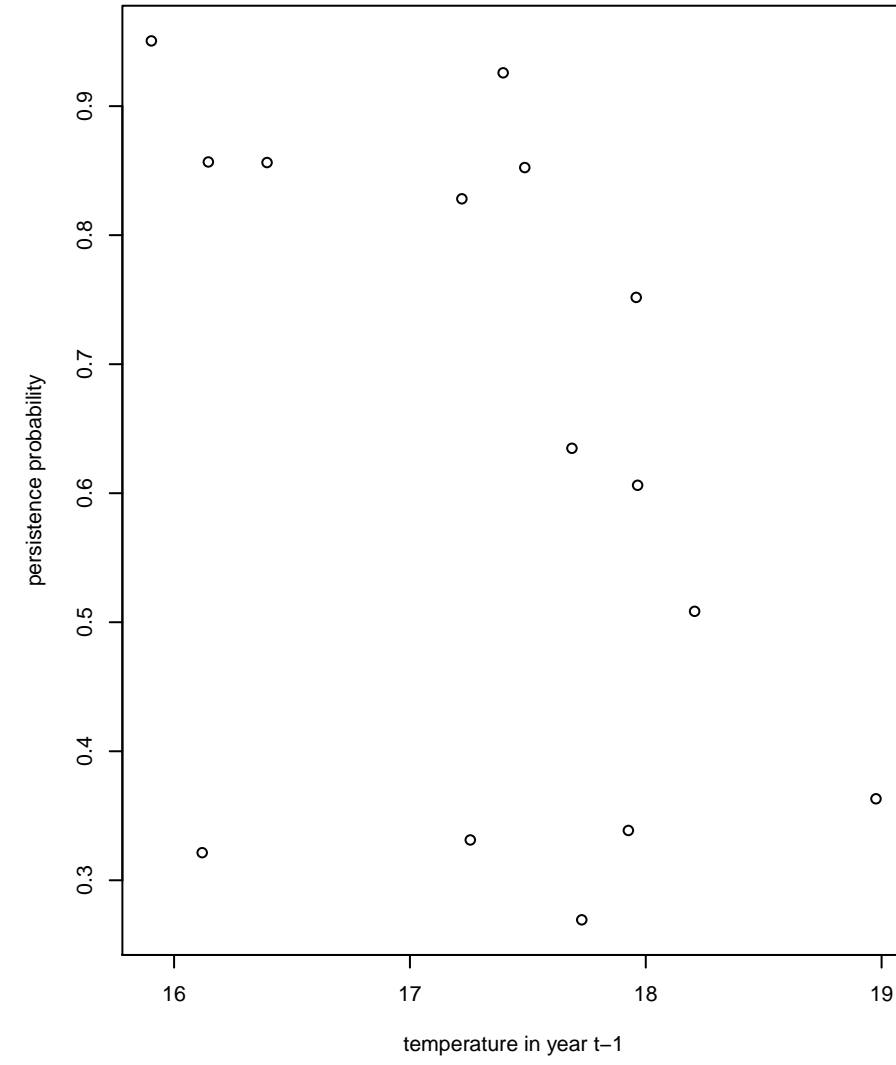

**Sympetrum flaveolum**

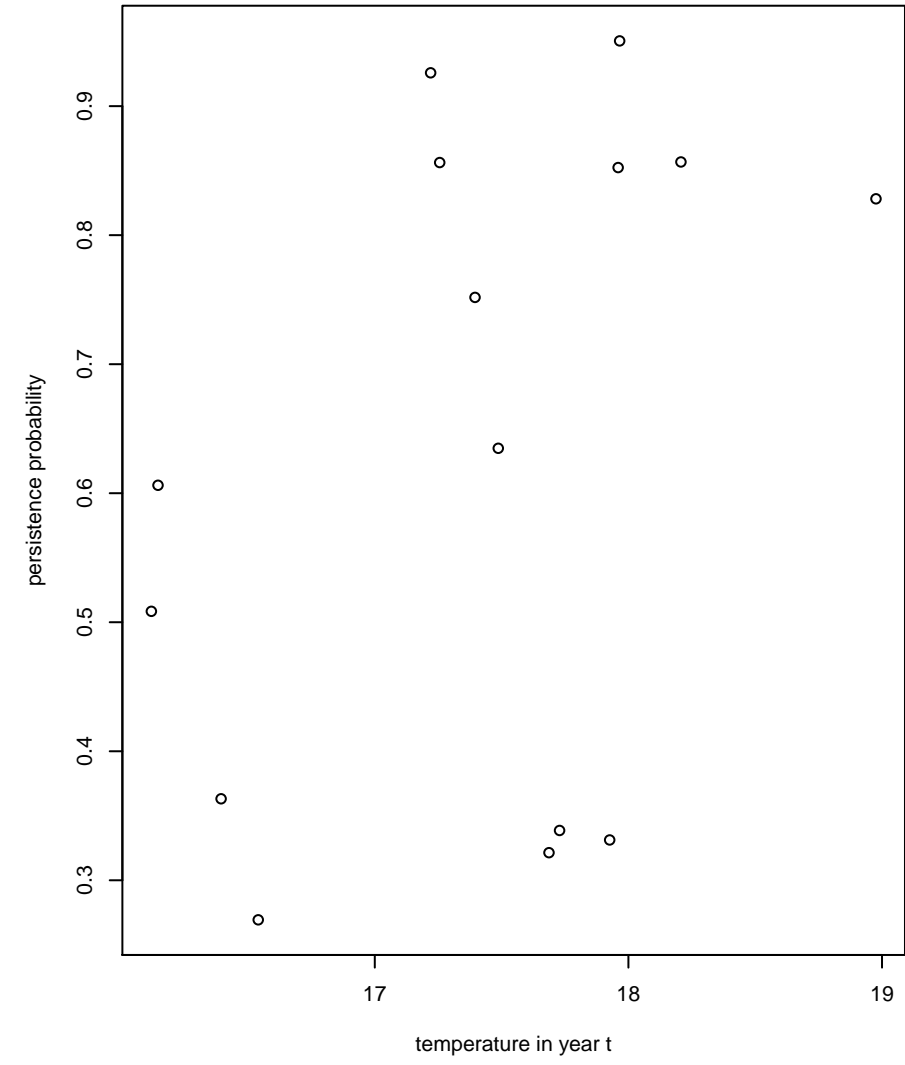

**Coenagrion lunulatum**

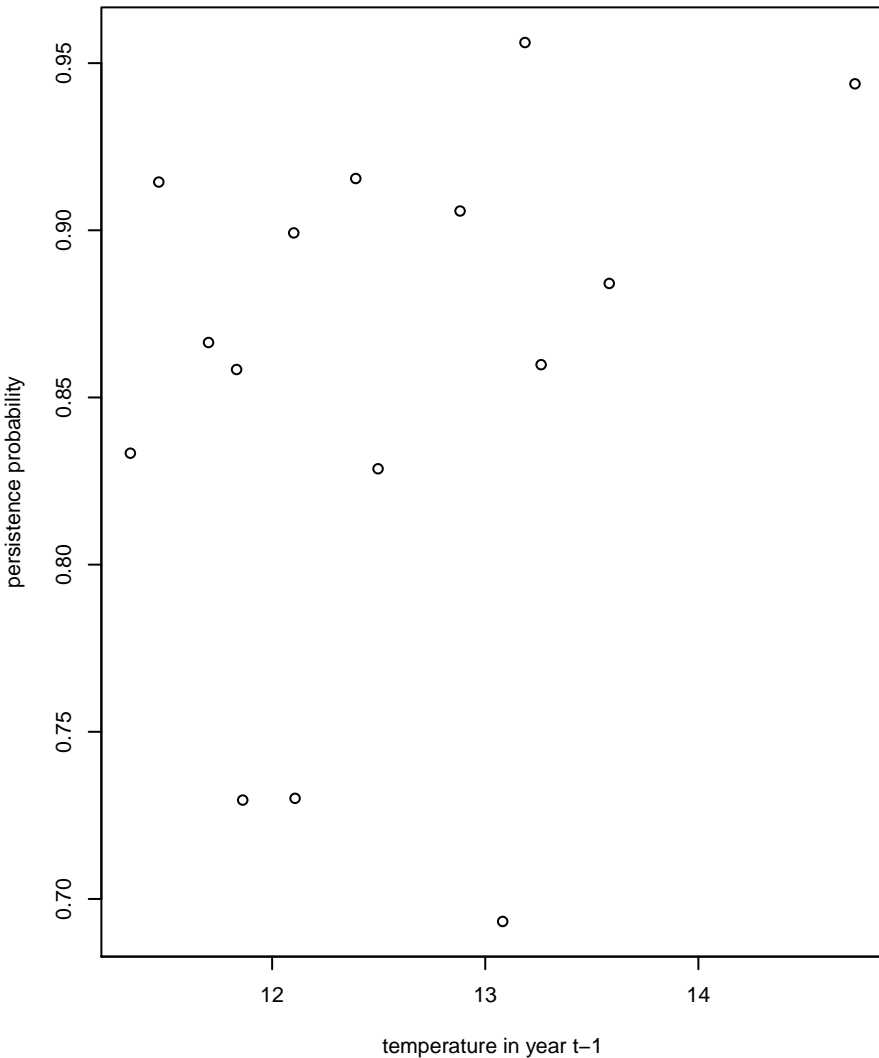

**Coenagrion lunulatum**

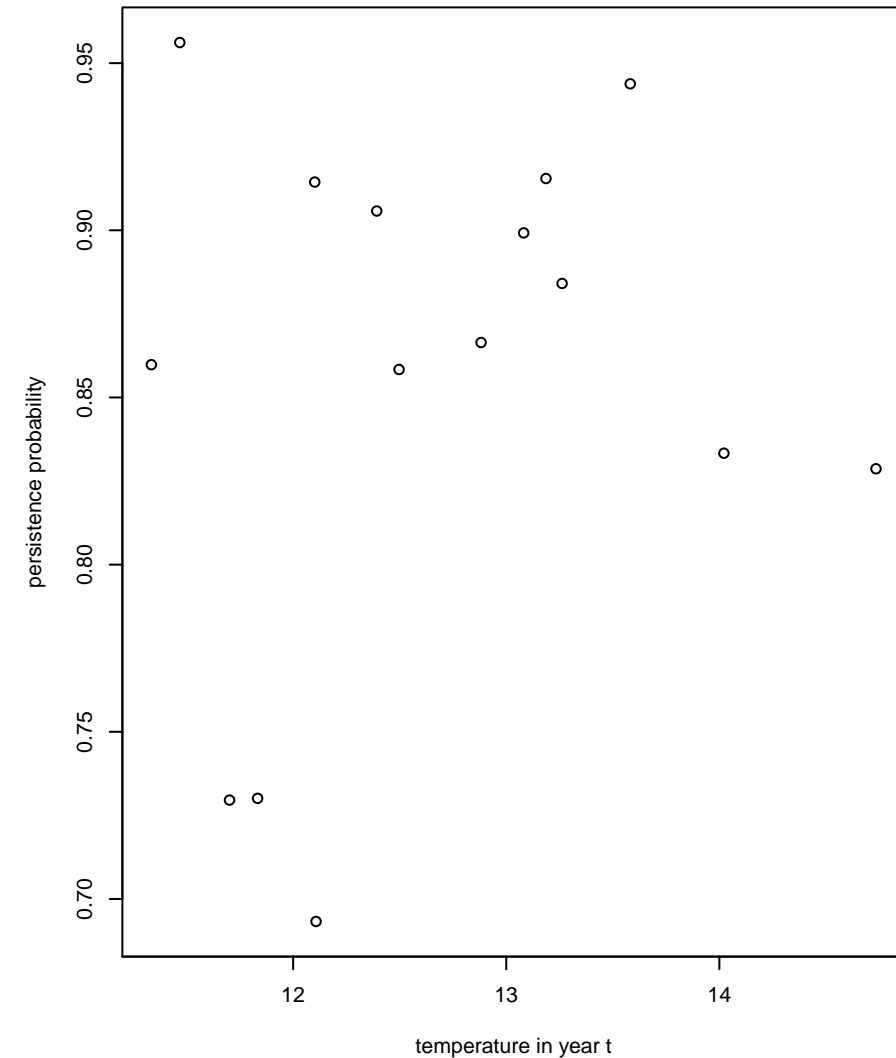

**Lestes dryas**

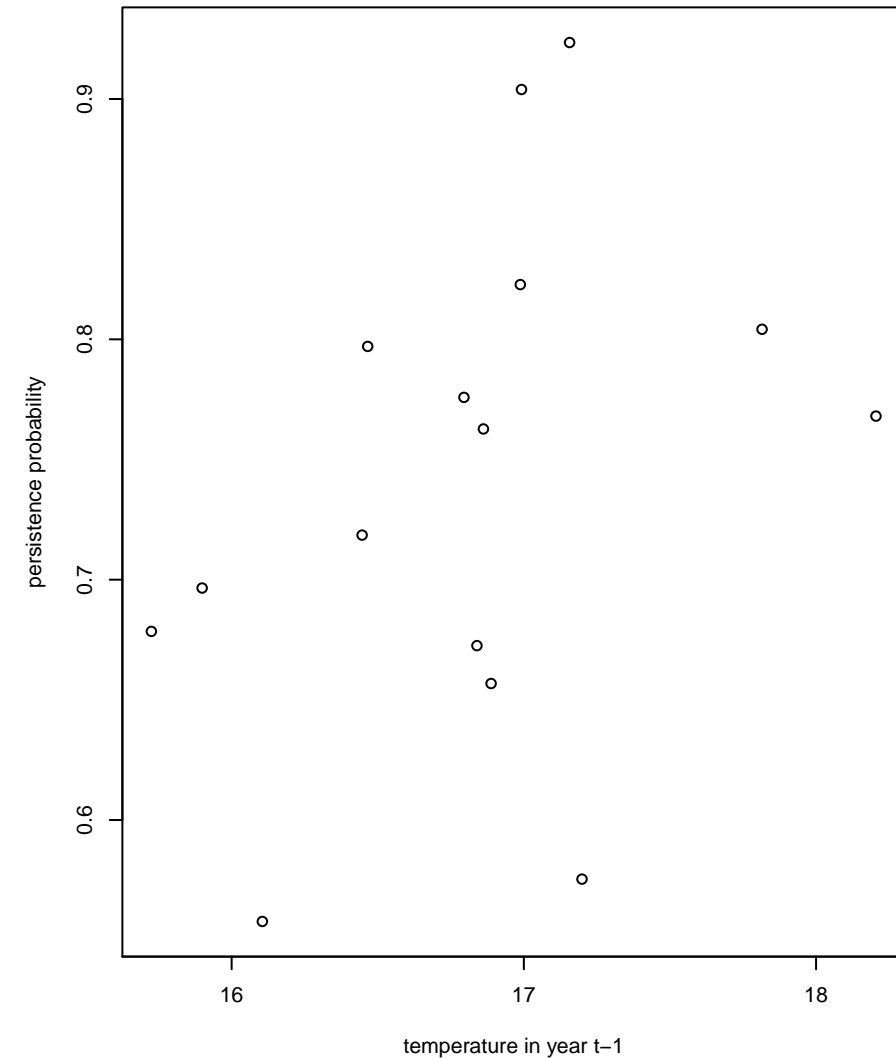

**Lestes dryas**

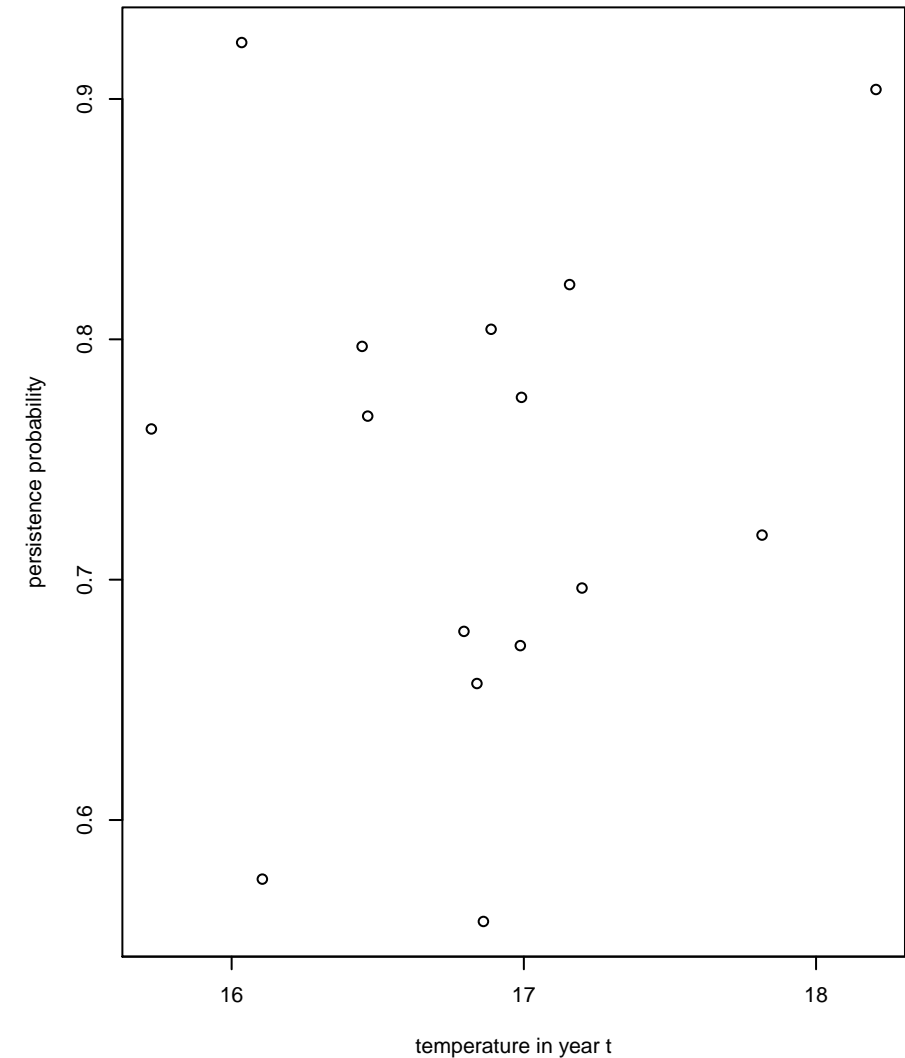

**Sympecma fusca**

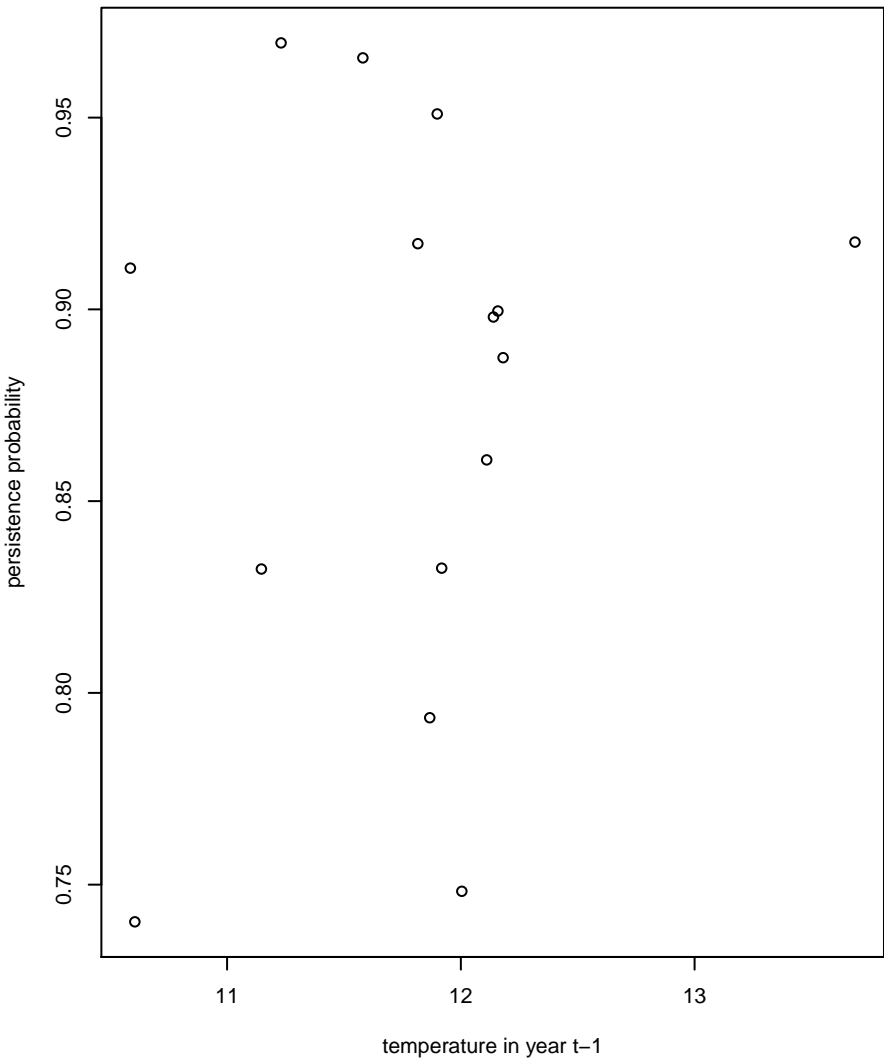

**Sympecma fusca**

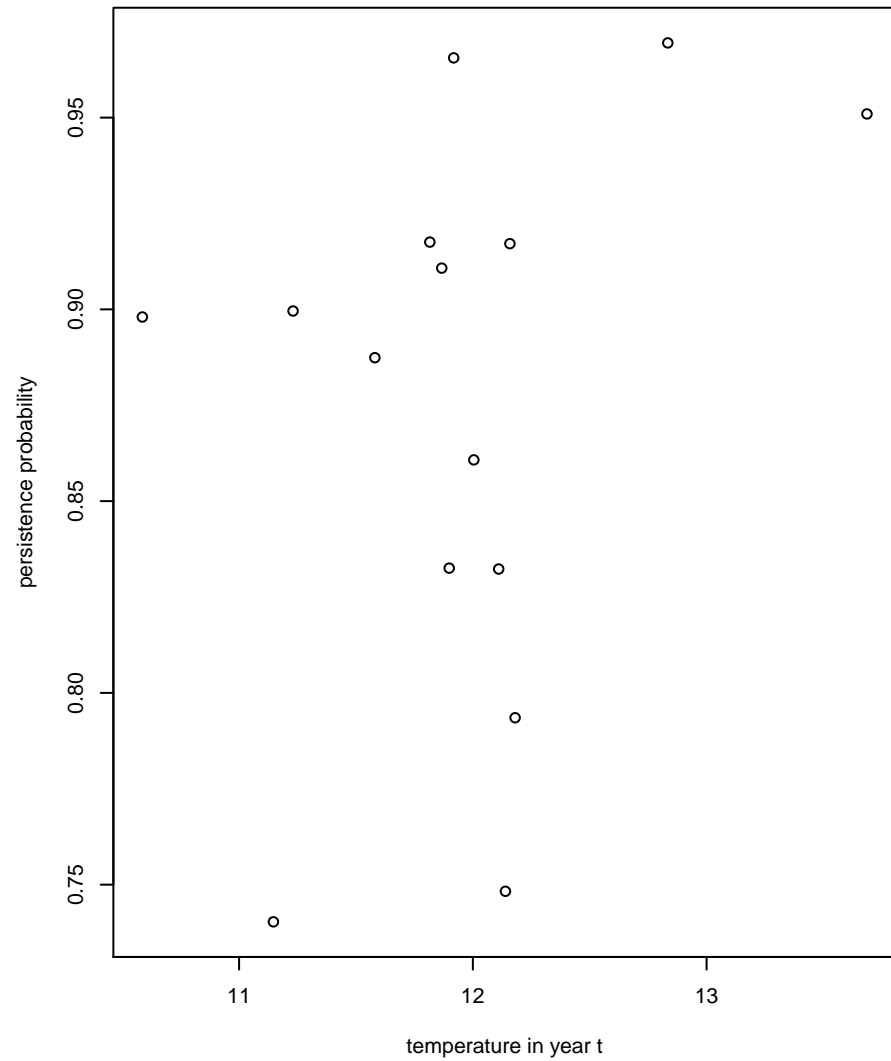

**Aeshna juncea**

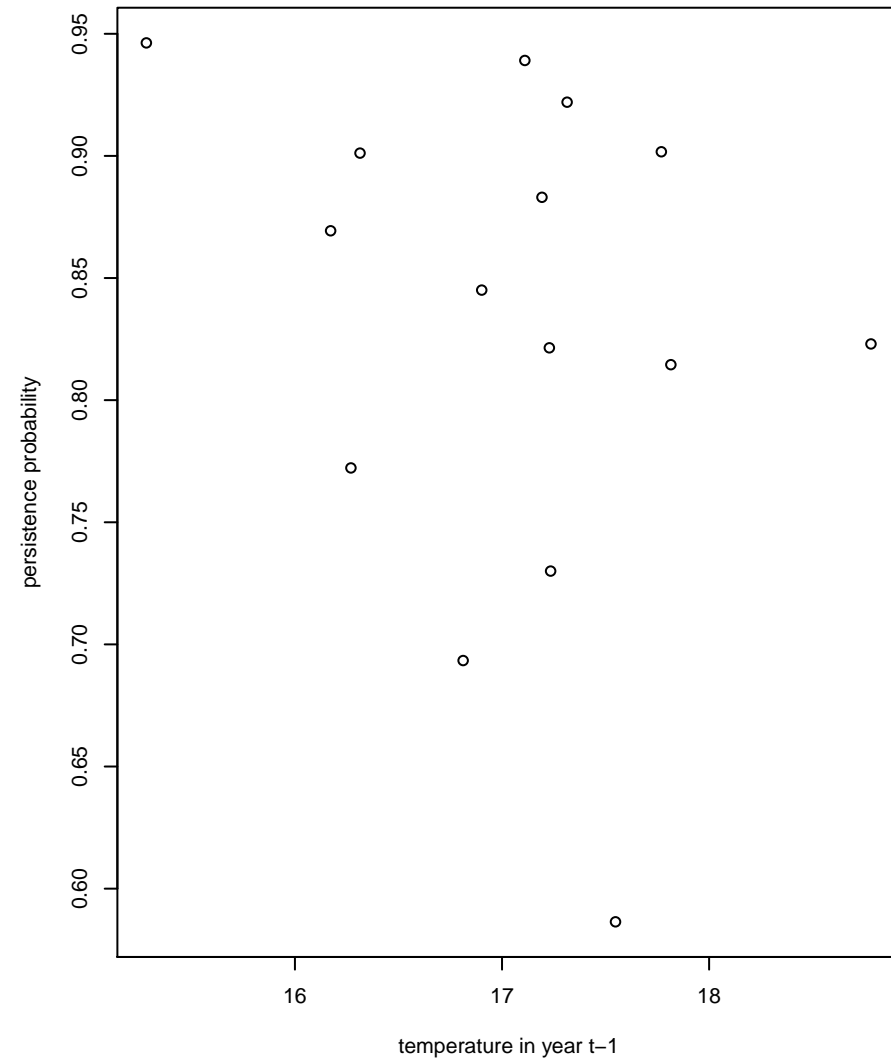

**Aeshna juncea**

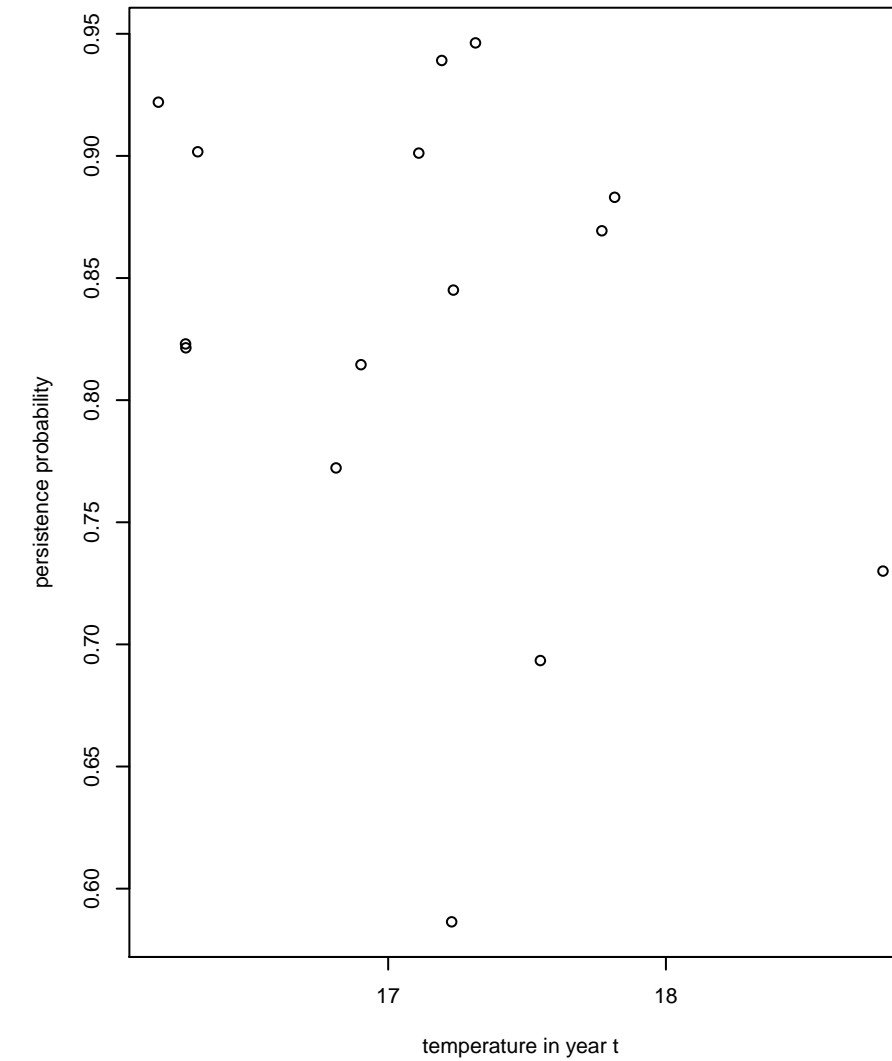

**Somatochlora metallica**

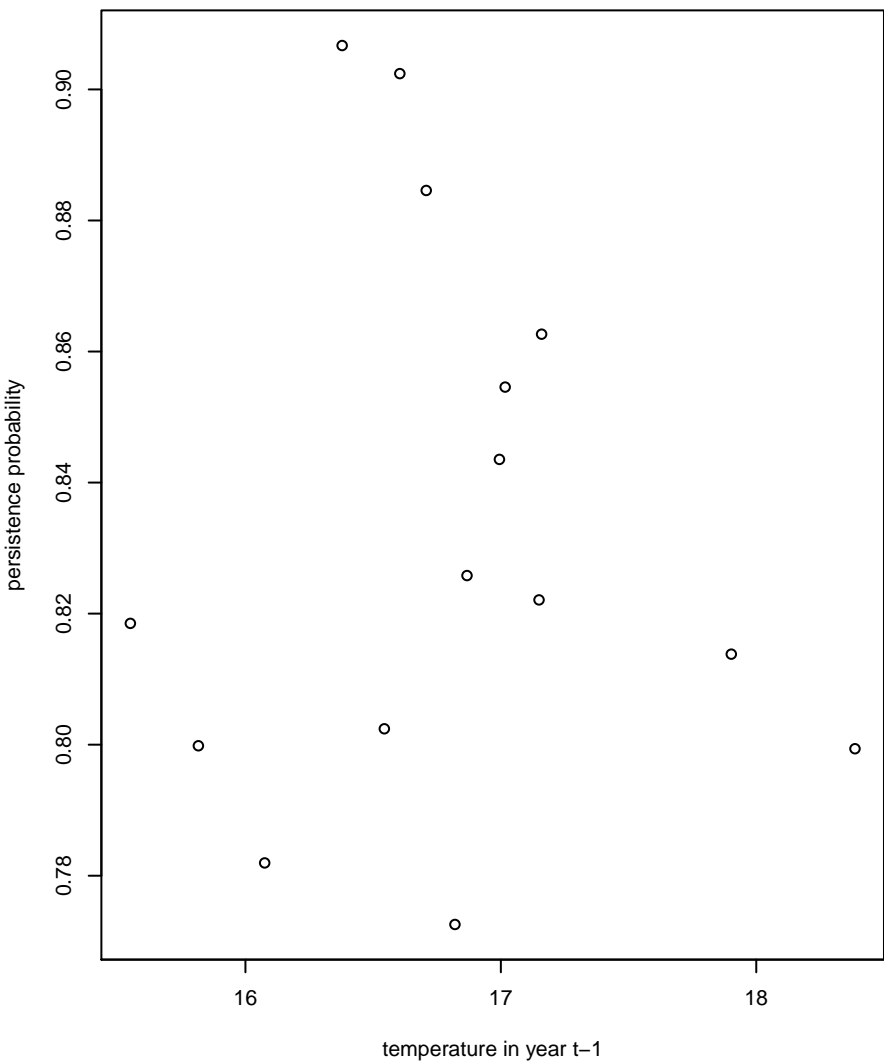

**Somatochlora metallica**

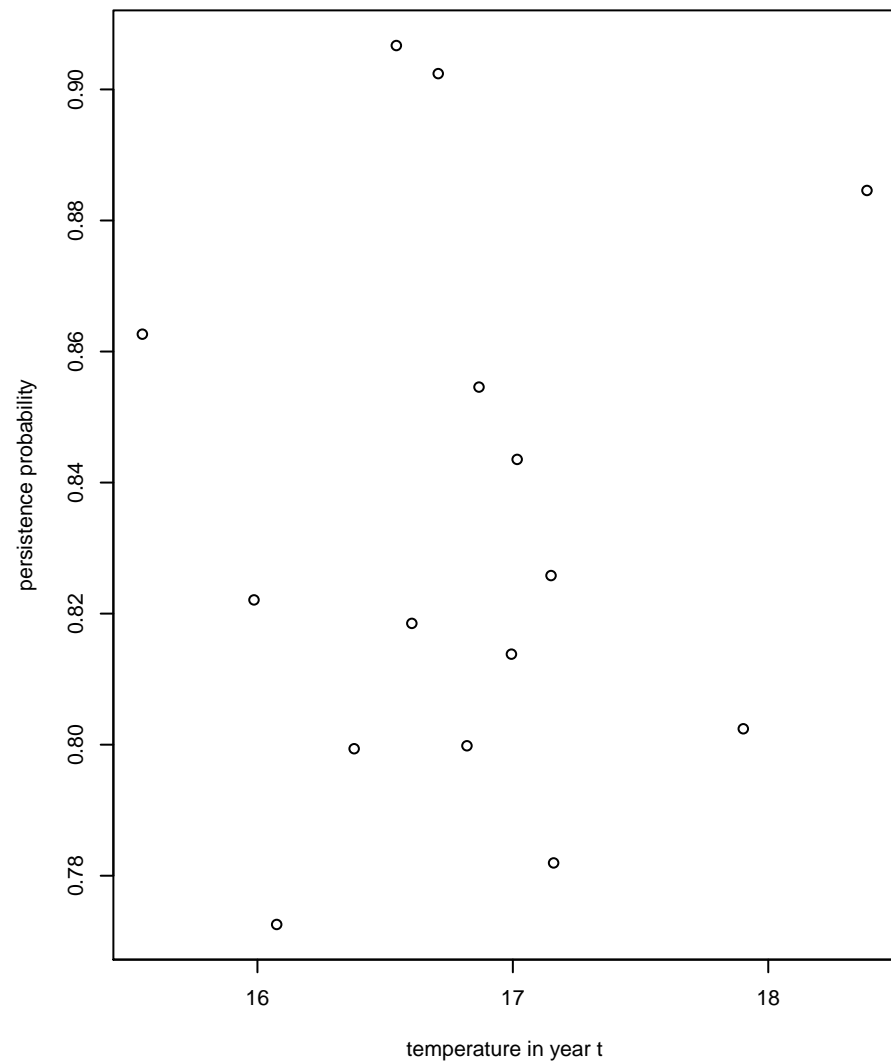

**Aeshna subarctica**

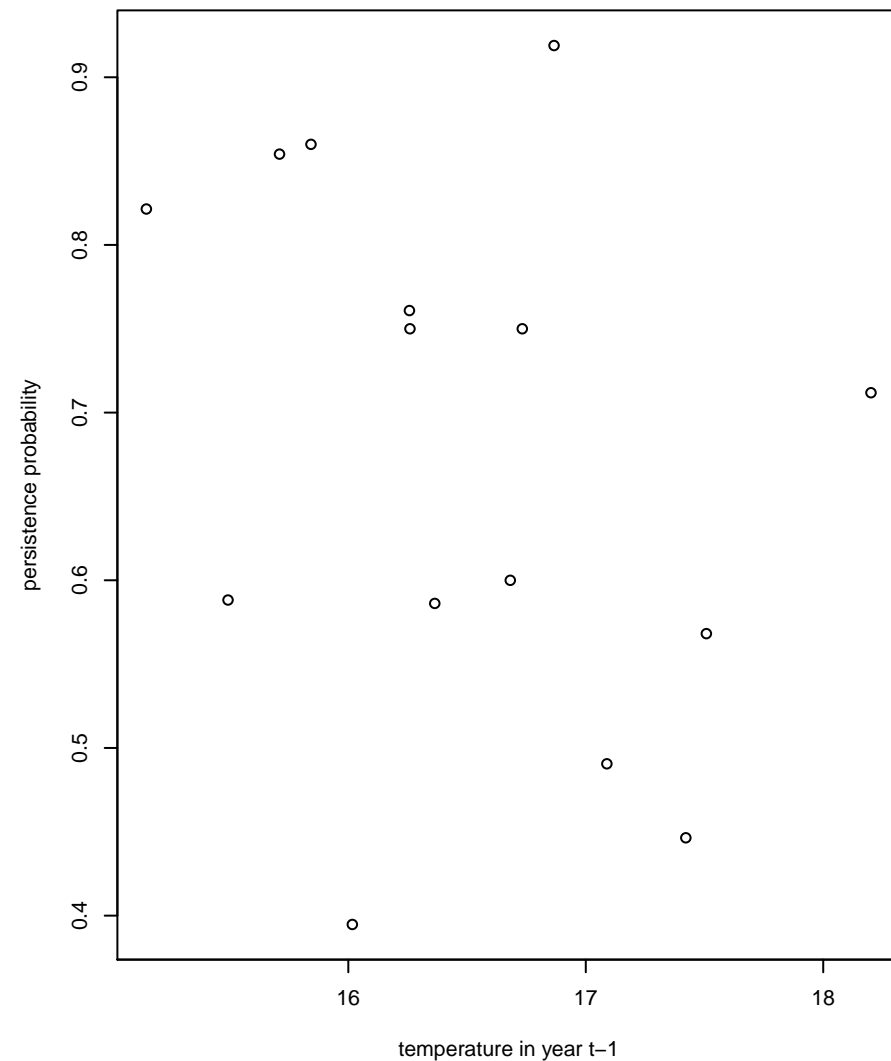

**Aeshna subarctica**

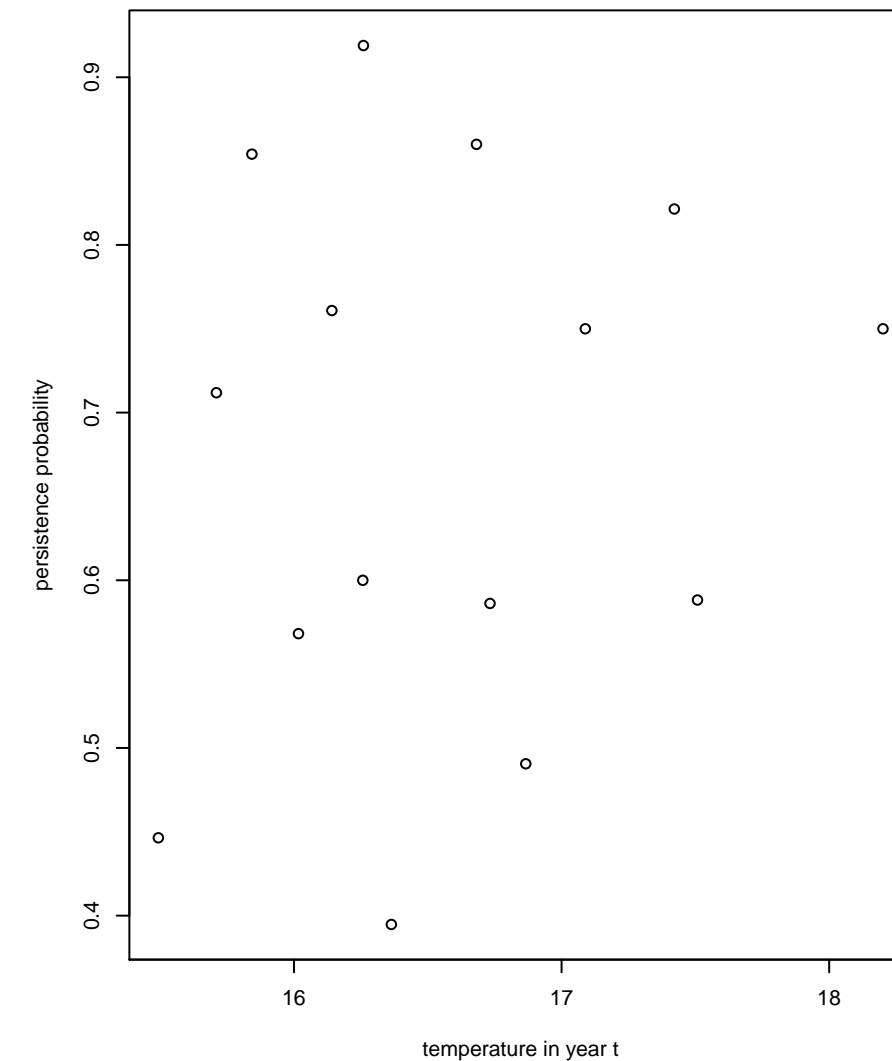

**Leucorrhinia pectoralis**

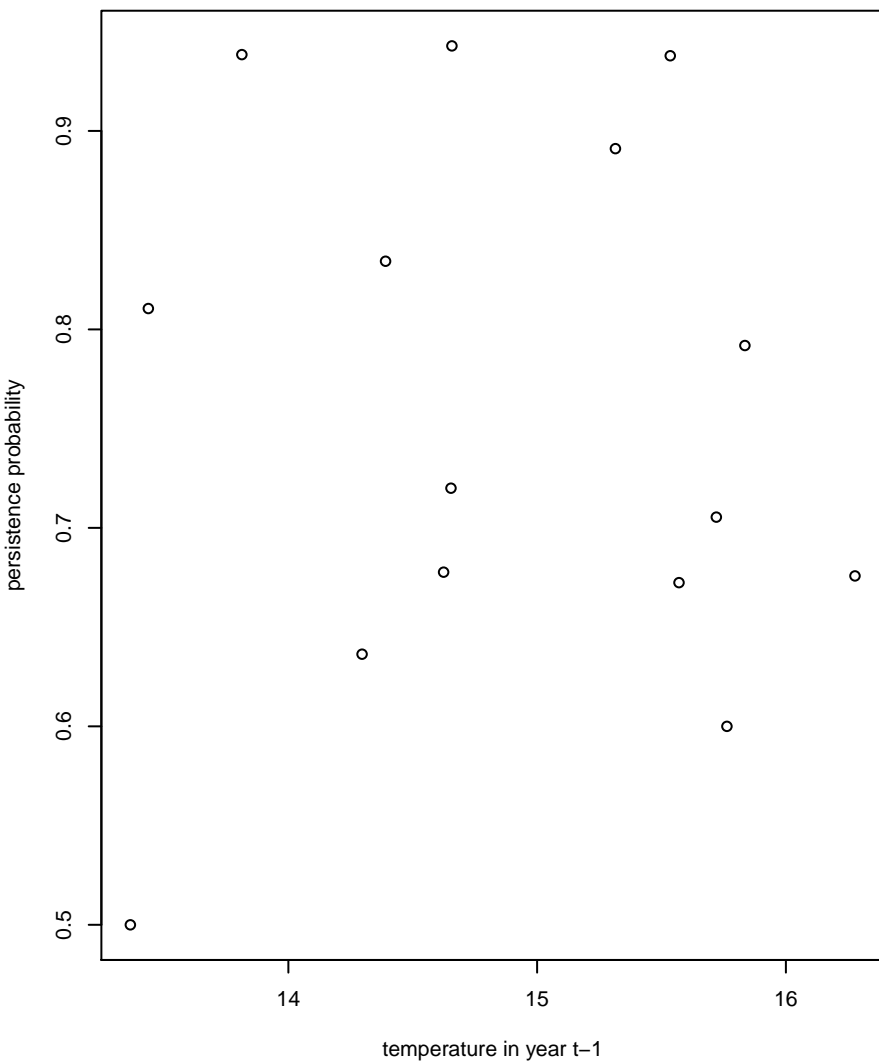

**Leucorrhinia pectoralis**

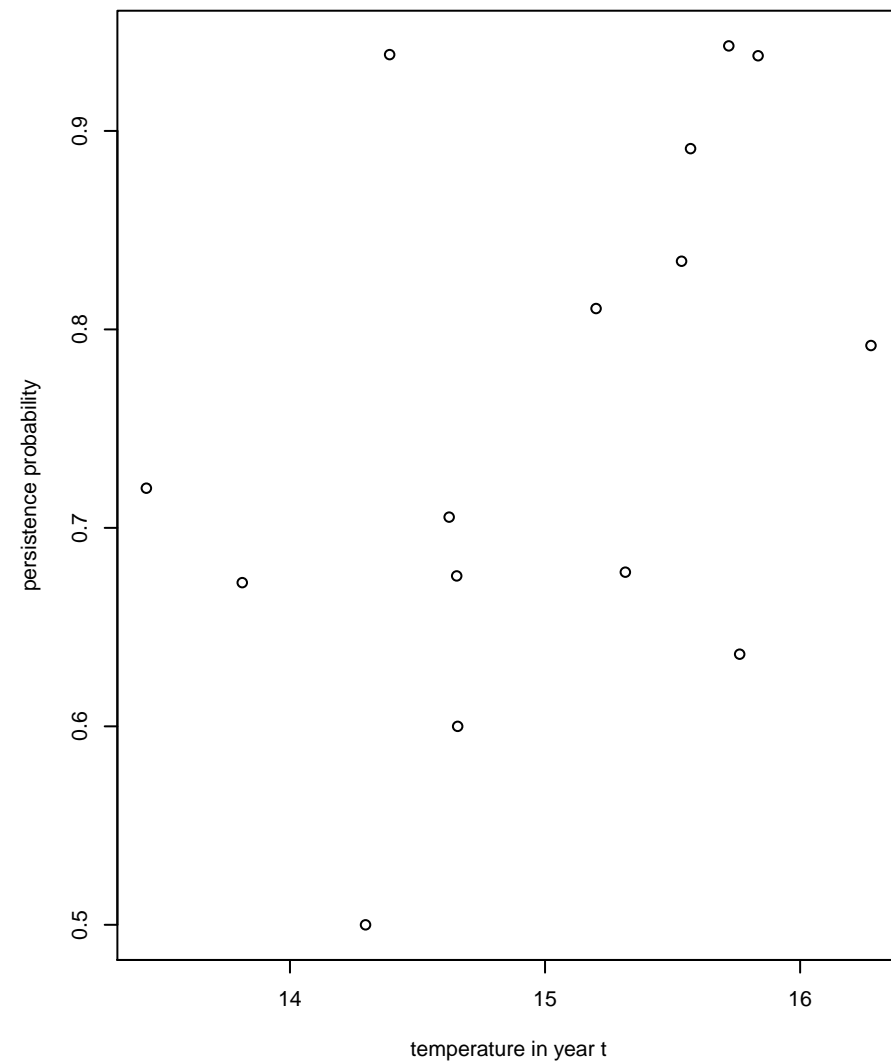

**Sympecma paedisca**

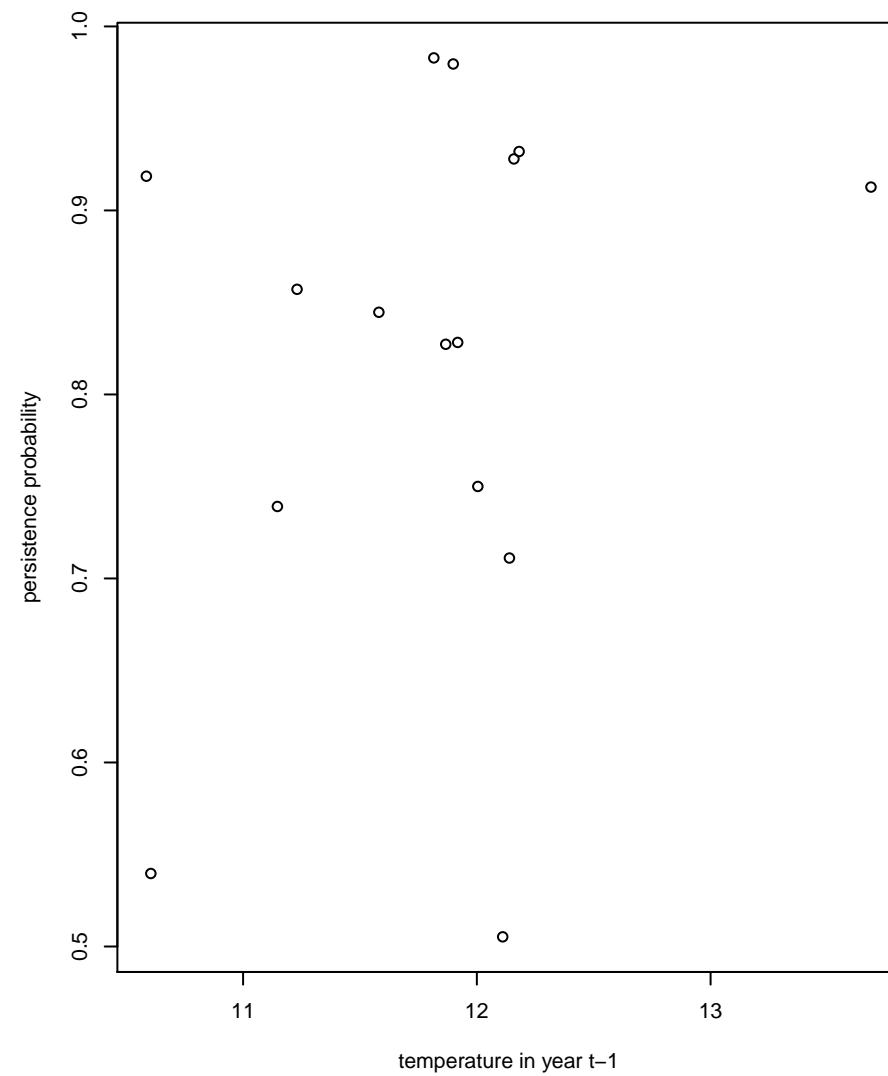

**Sympecma paedisca**

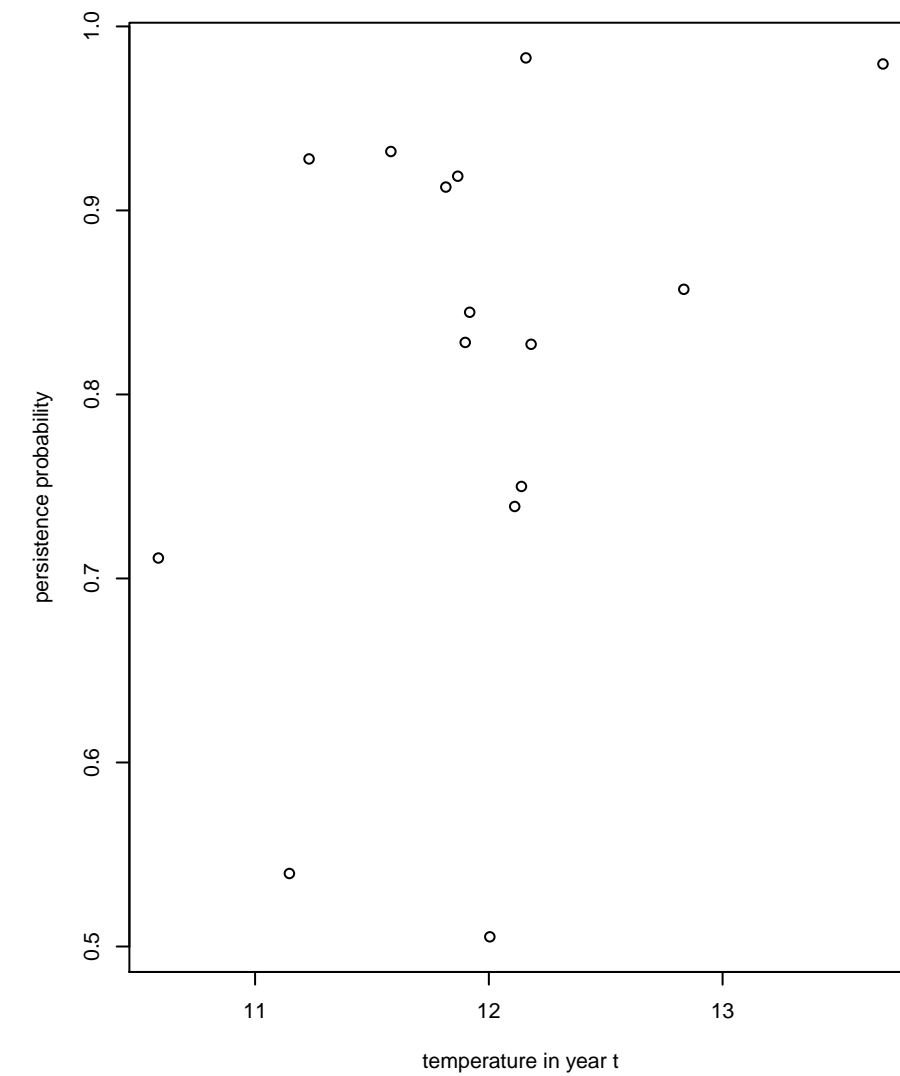

**Anax imperator**

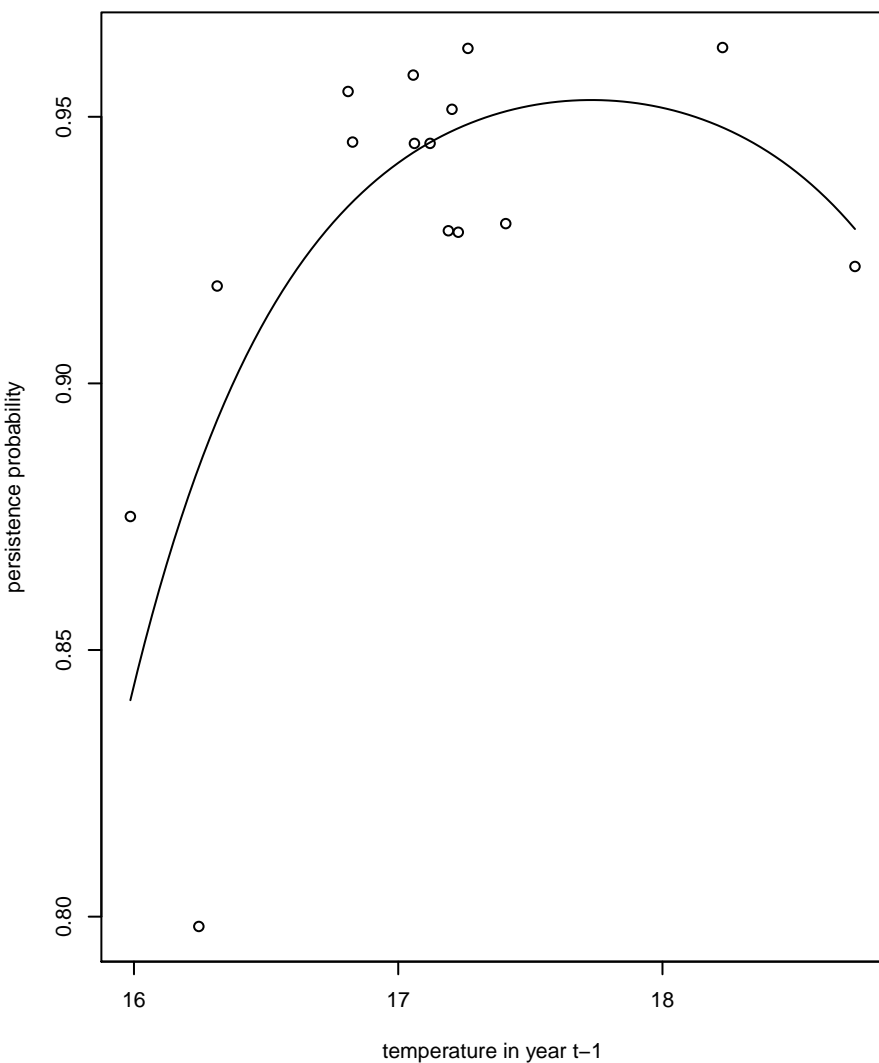

**Anax imperator**

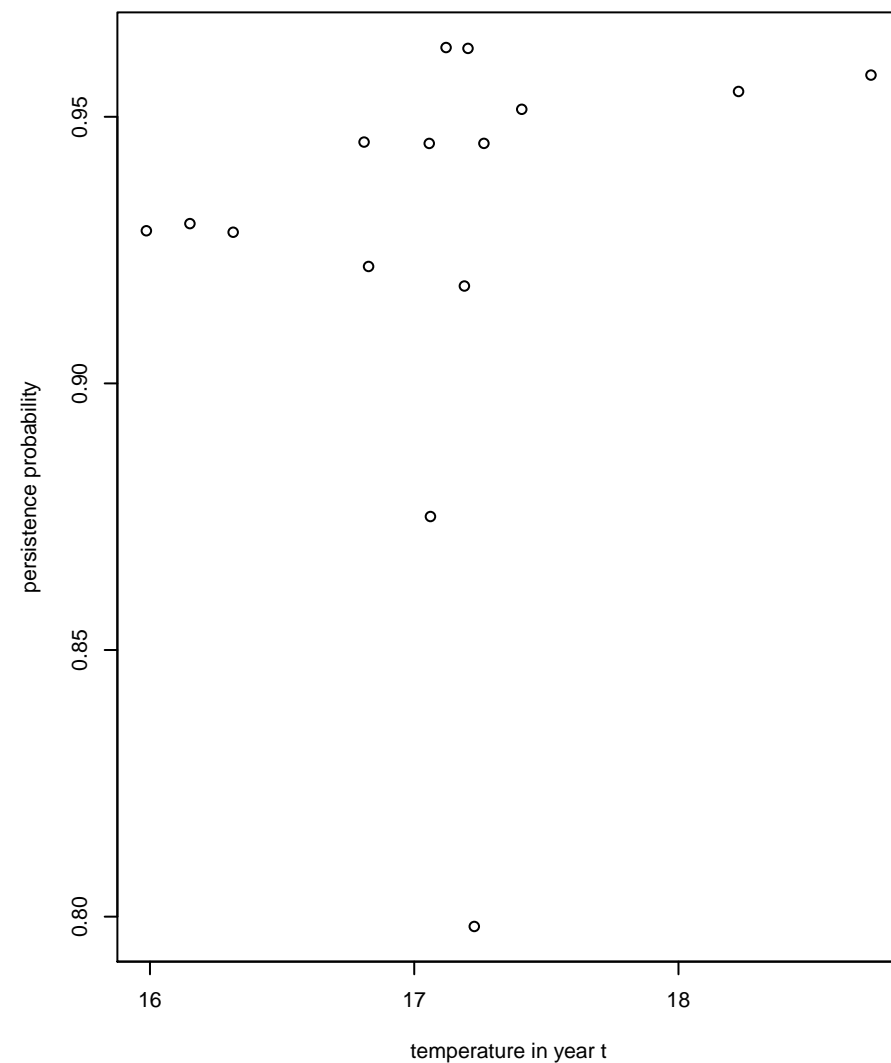

**Erythromma viridulum**

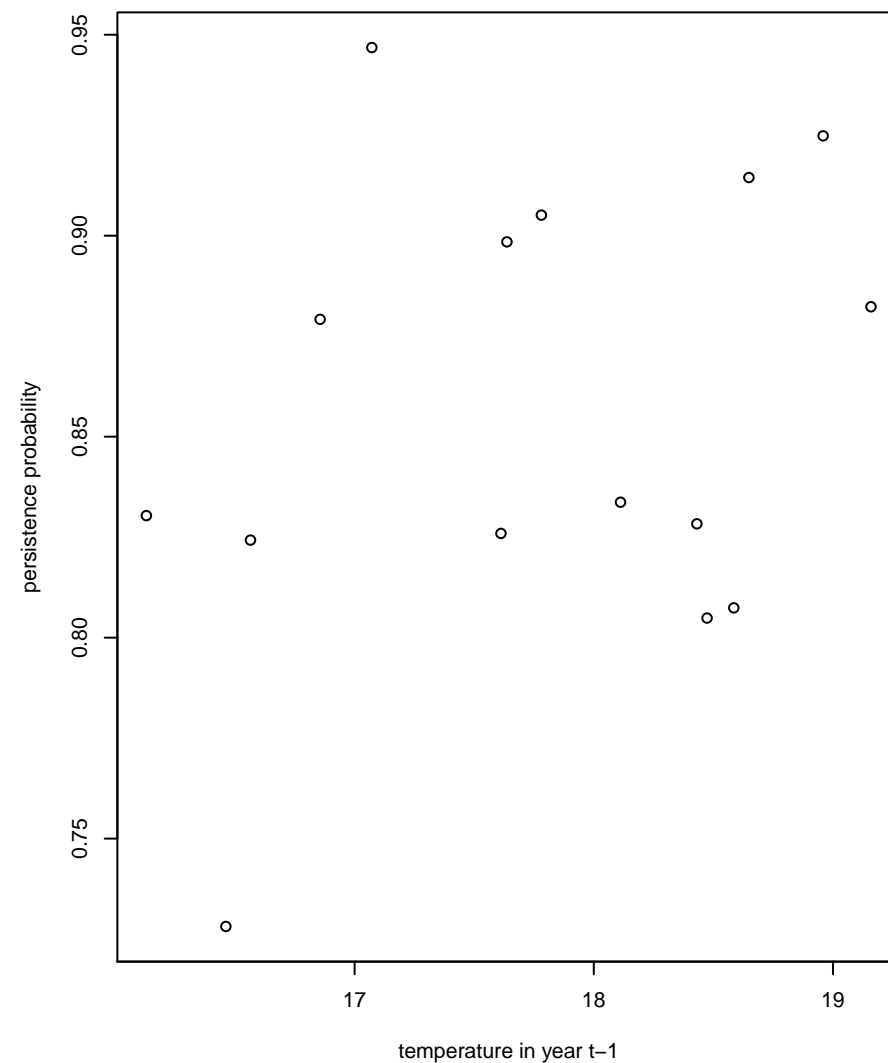

**Erythromma viridulum**

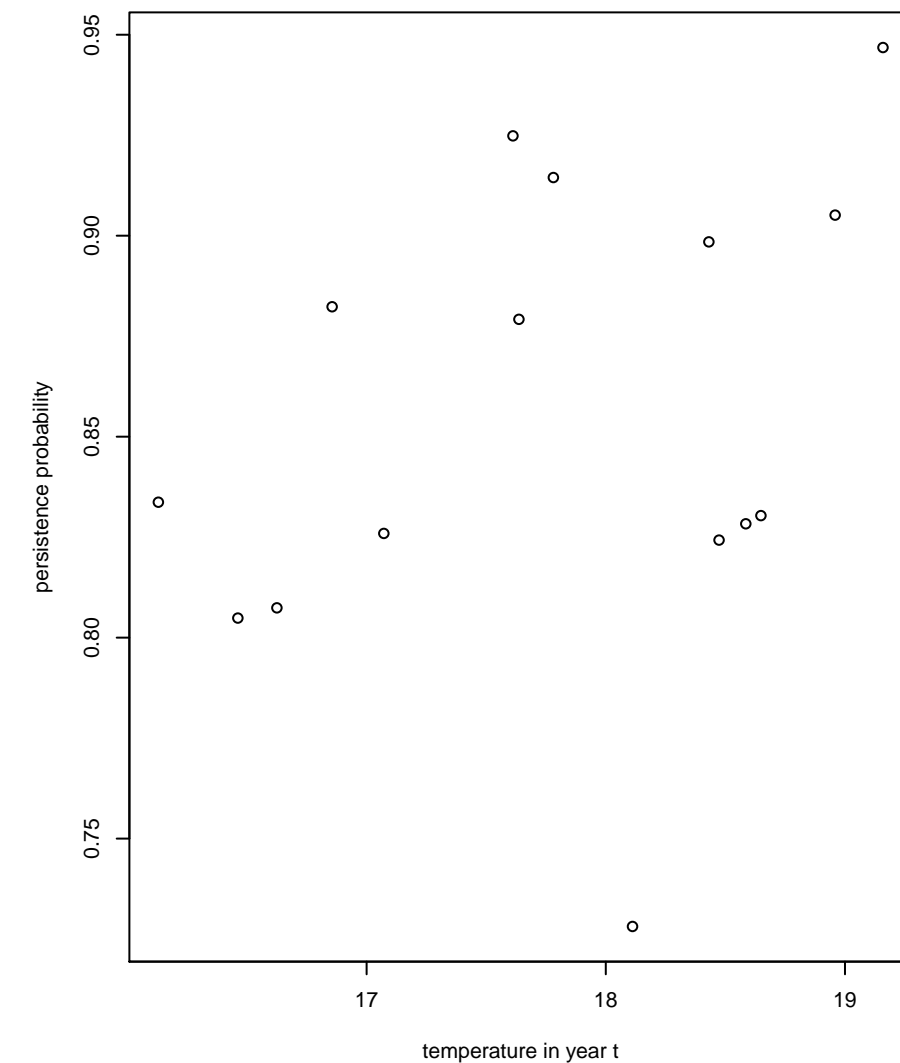

**Platycnemis pennipes**

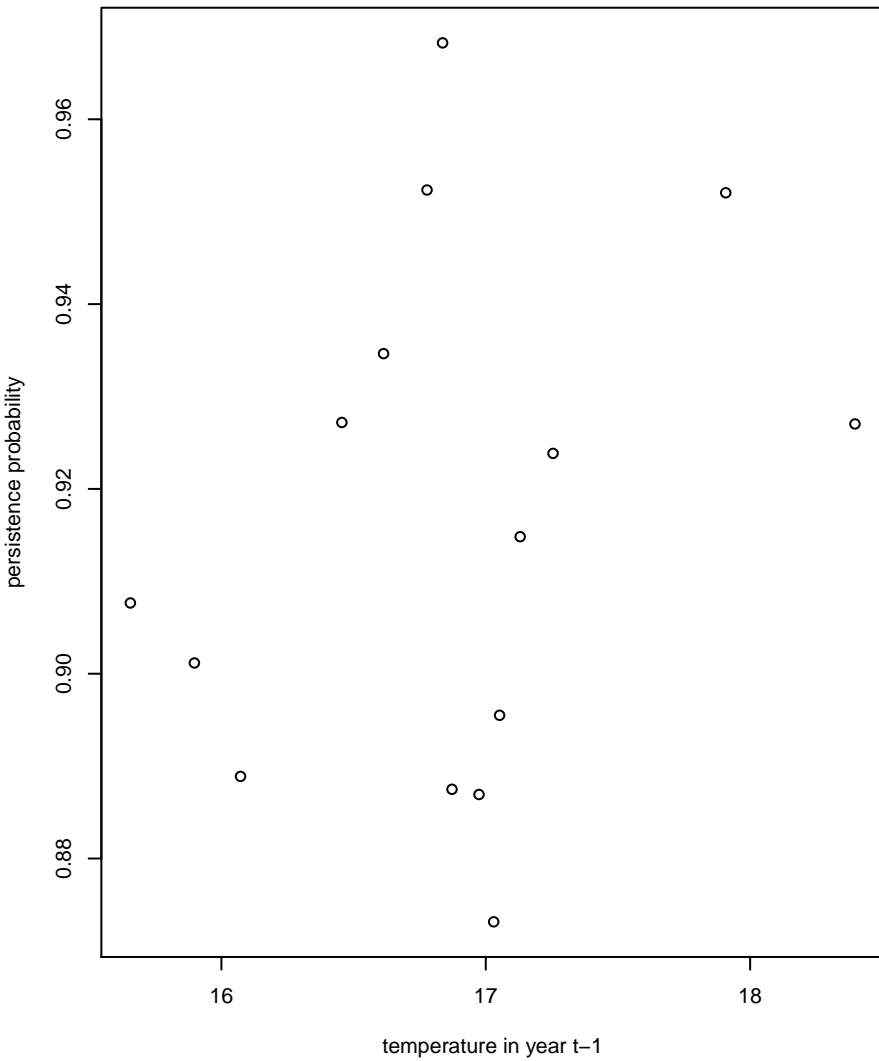

**Platycnemis pennipes**

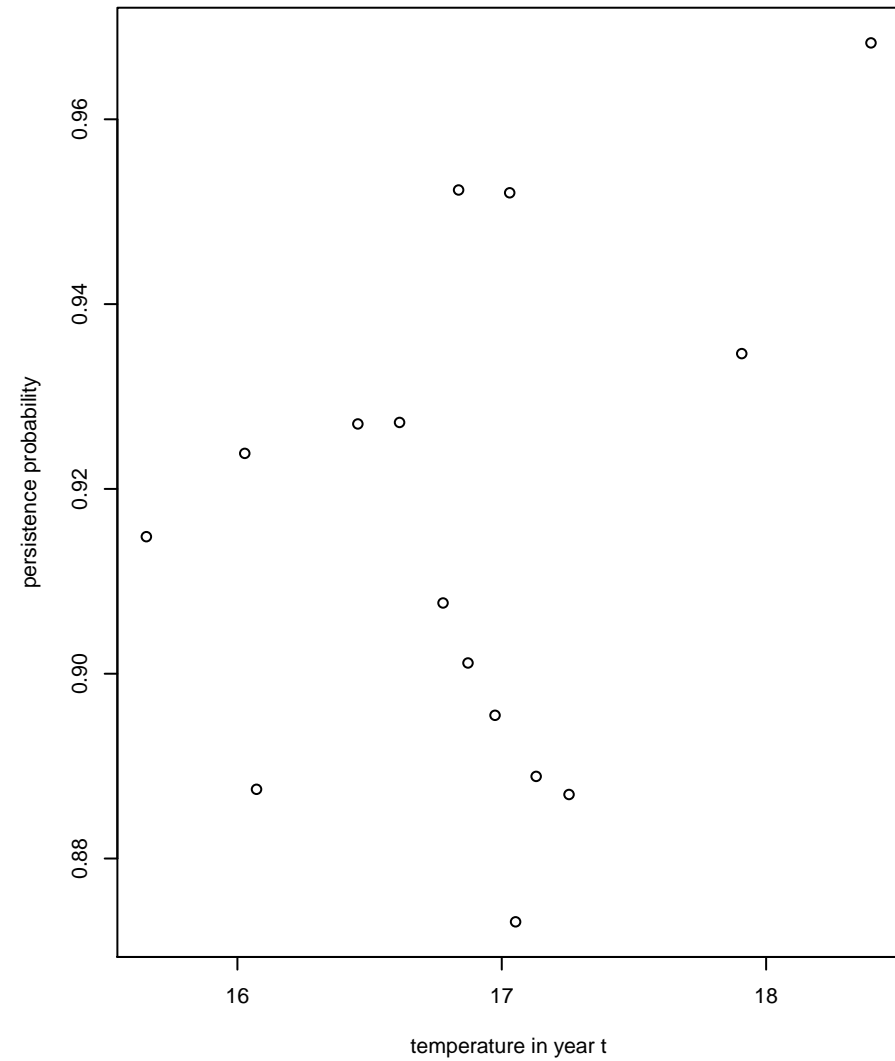

**Libellula fulva**

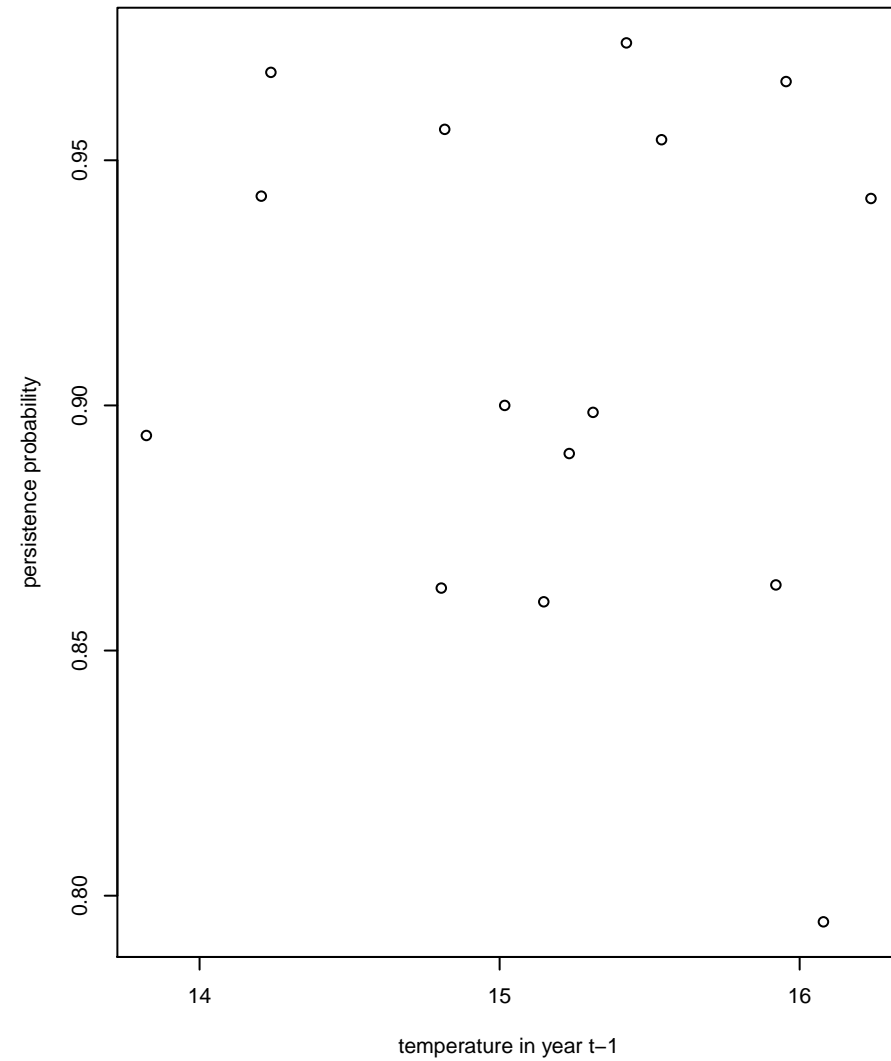

**Libellula fulva**

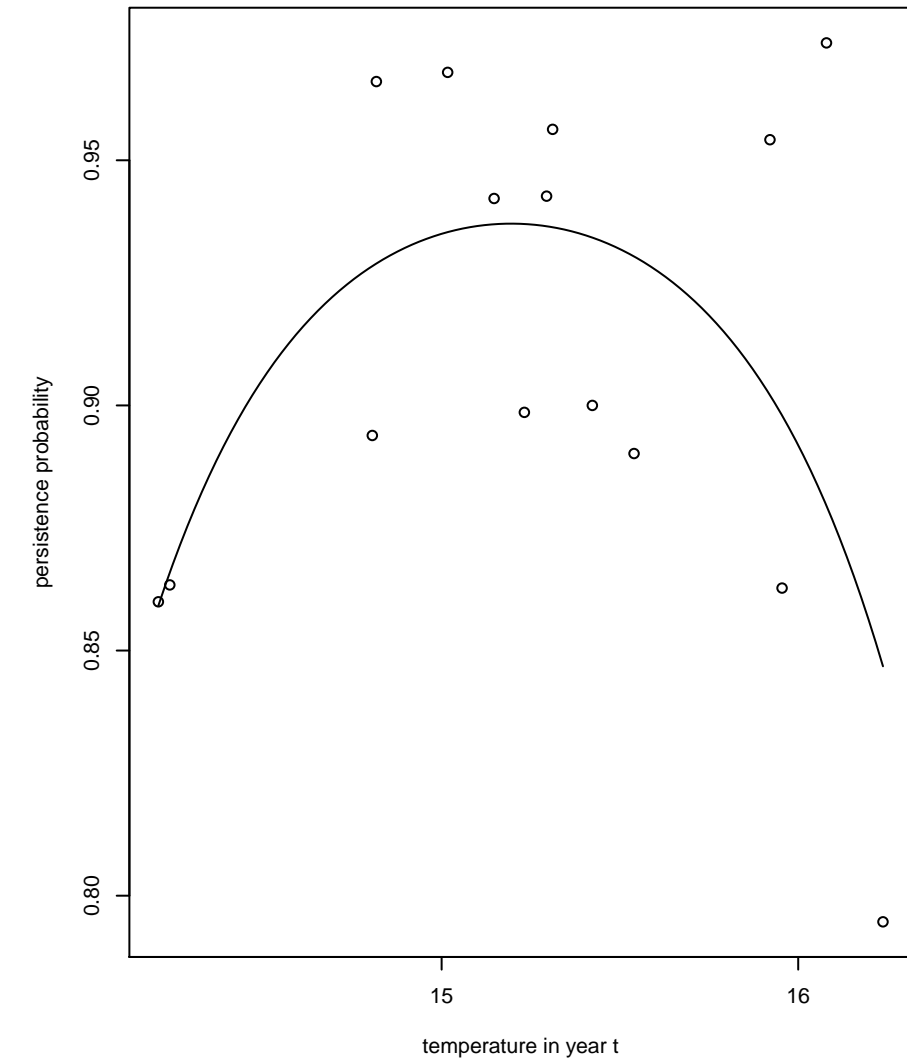

**Orthetrum coerulescens**

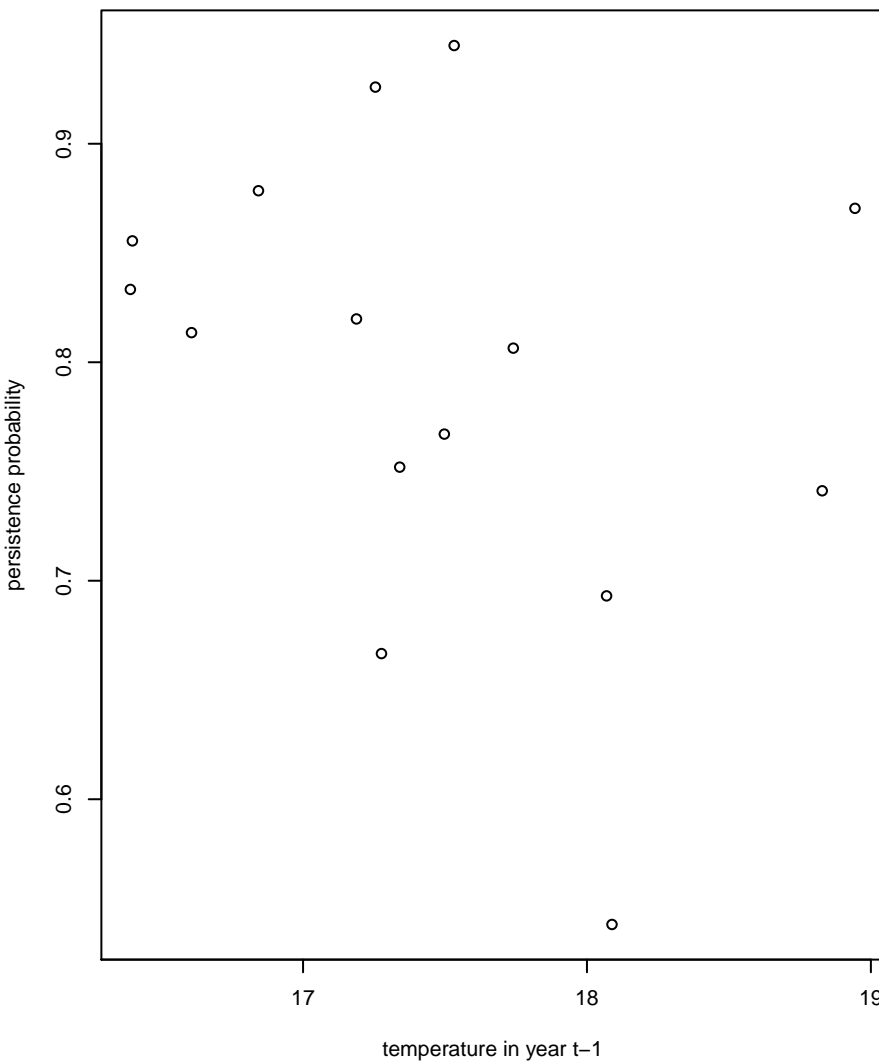

**Orthetrum coerulescens**

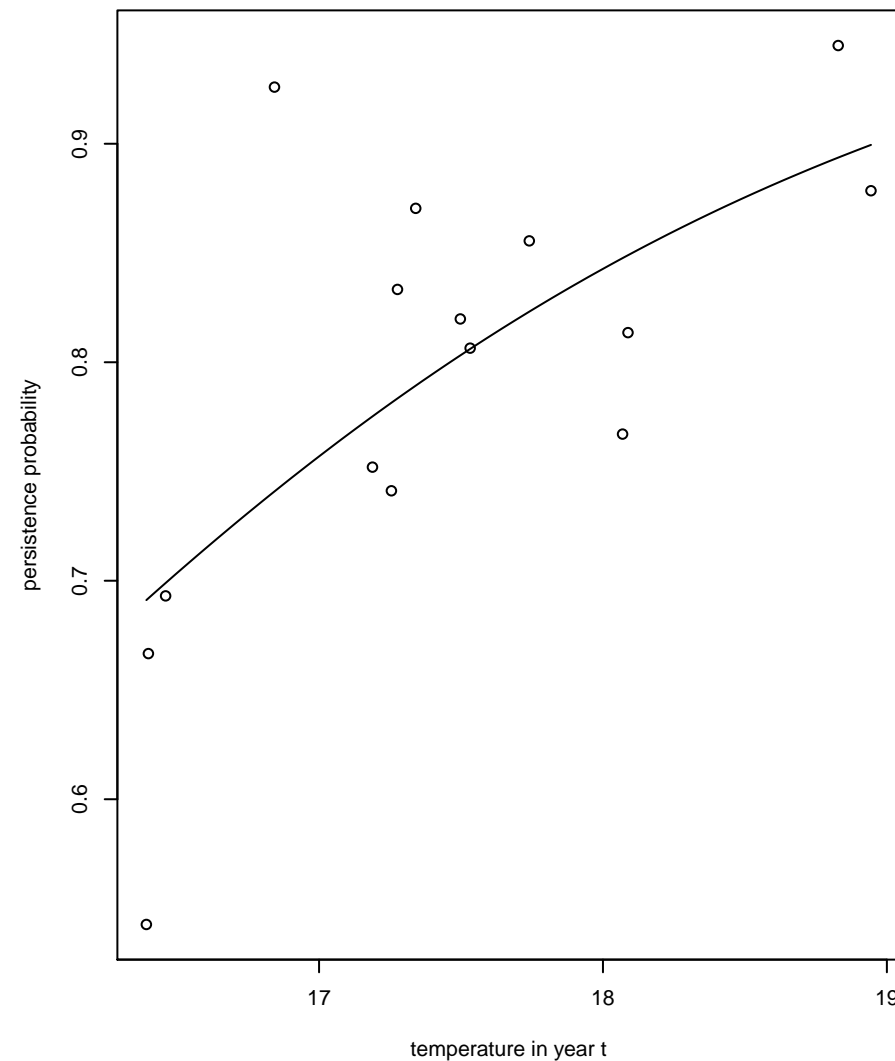

**Coenagrion hastulatum**

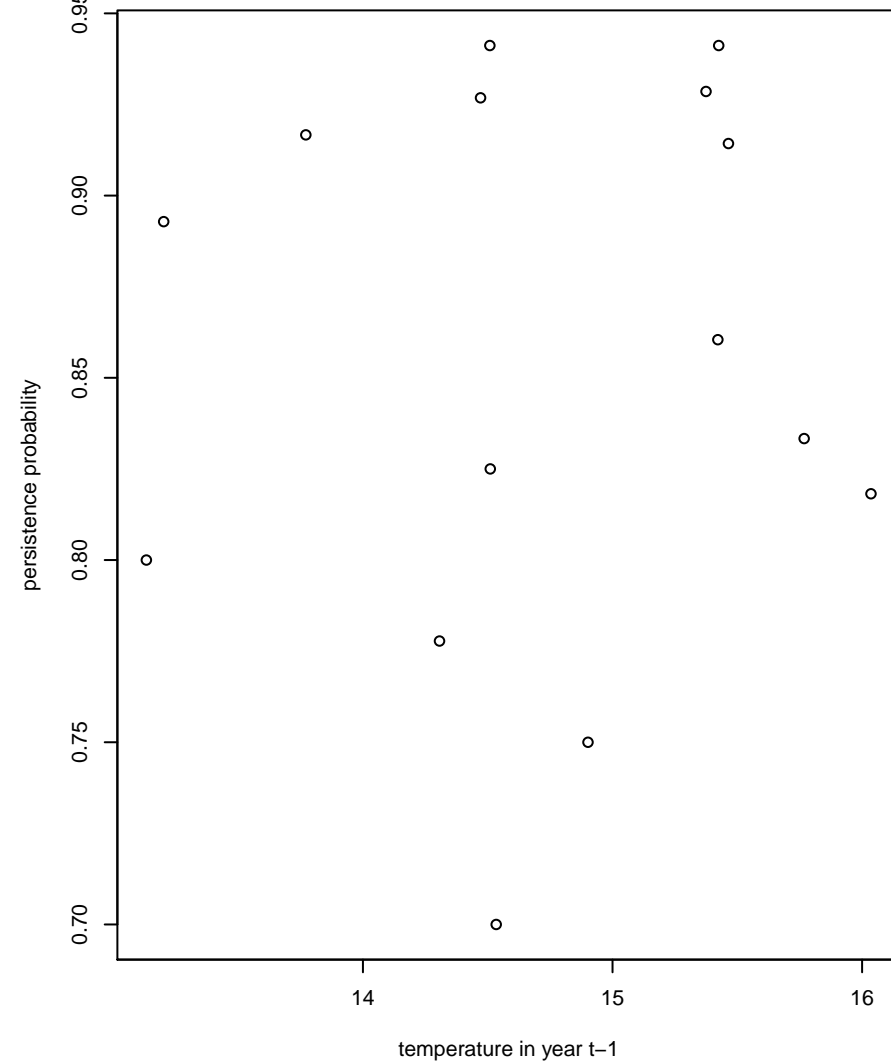

**Coenagrion hastulatum**

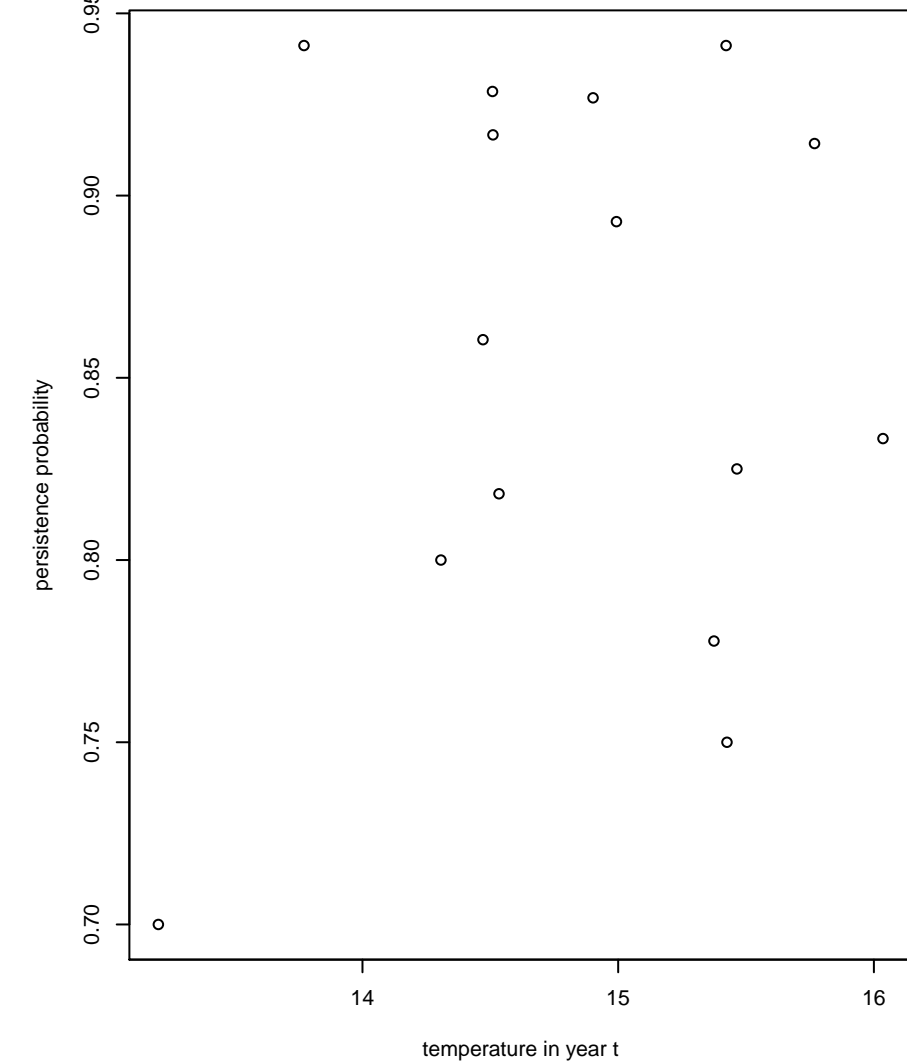



**Sympetrum meridionale**

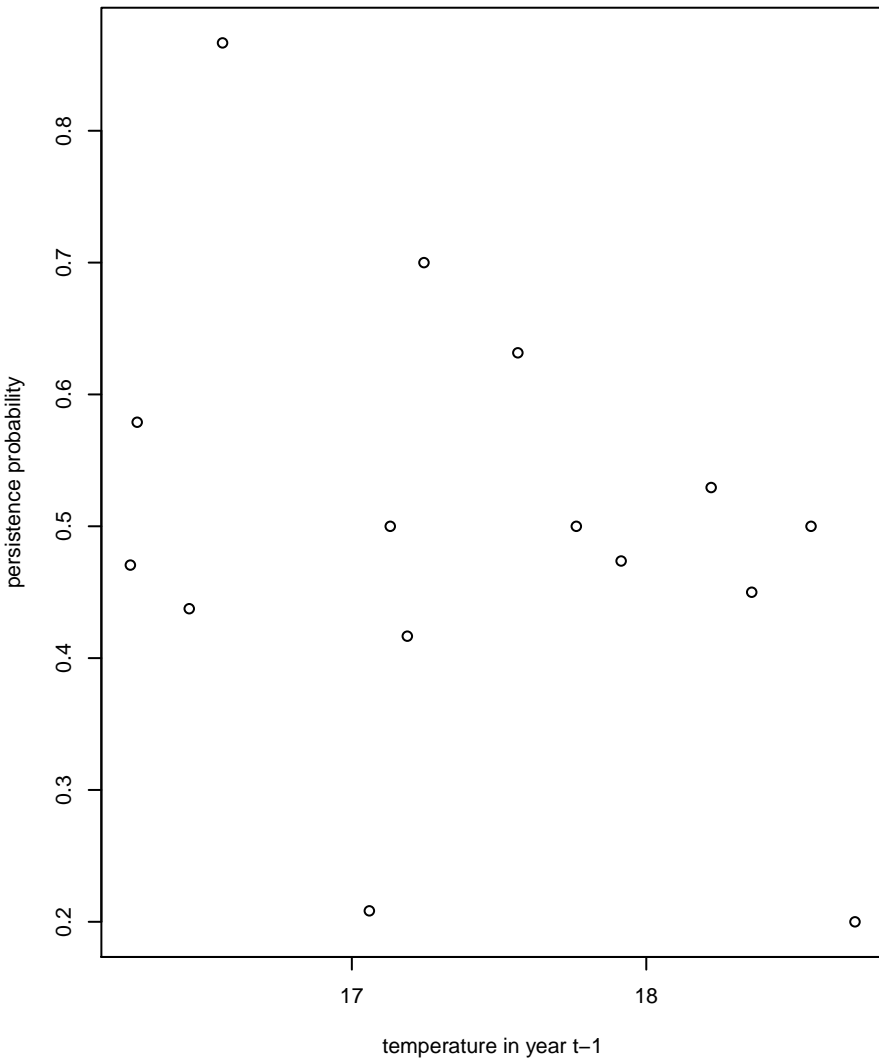

**Sympetrum meridionale**

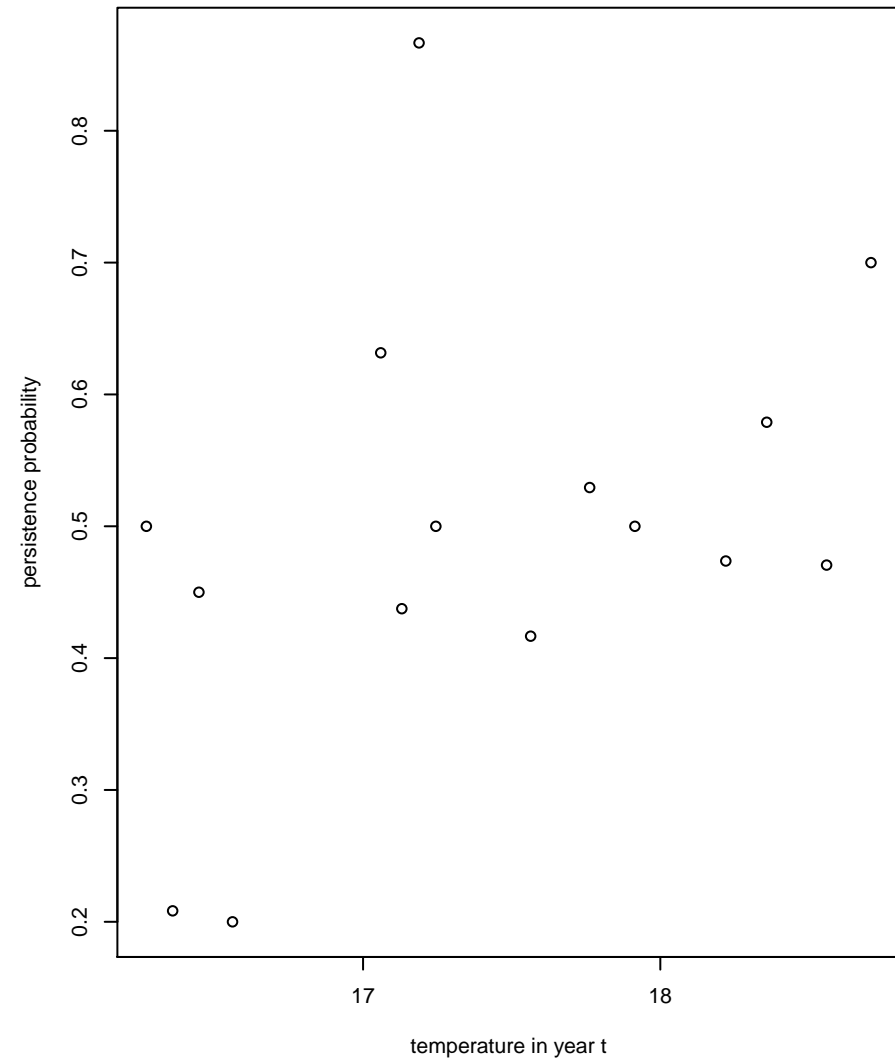

**Gomphus pulchellus**

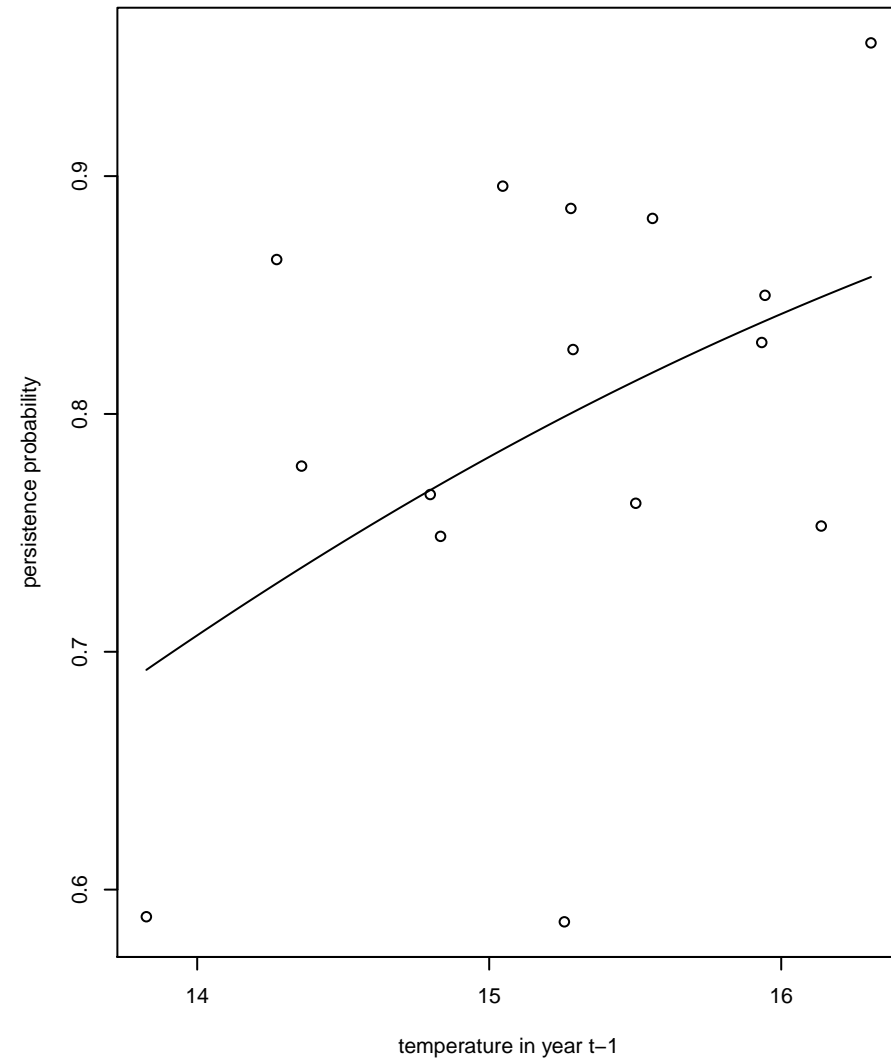

**Gomphus pulchellus**

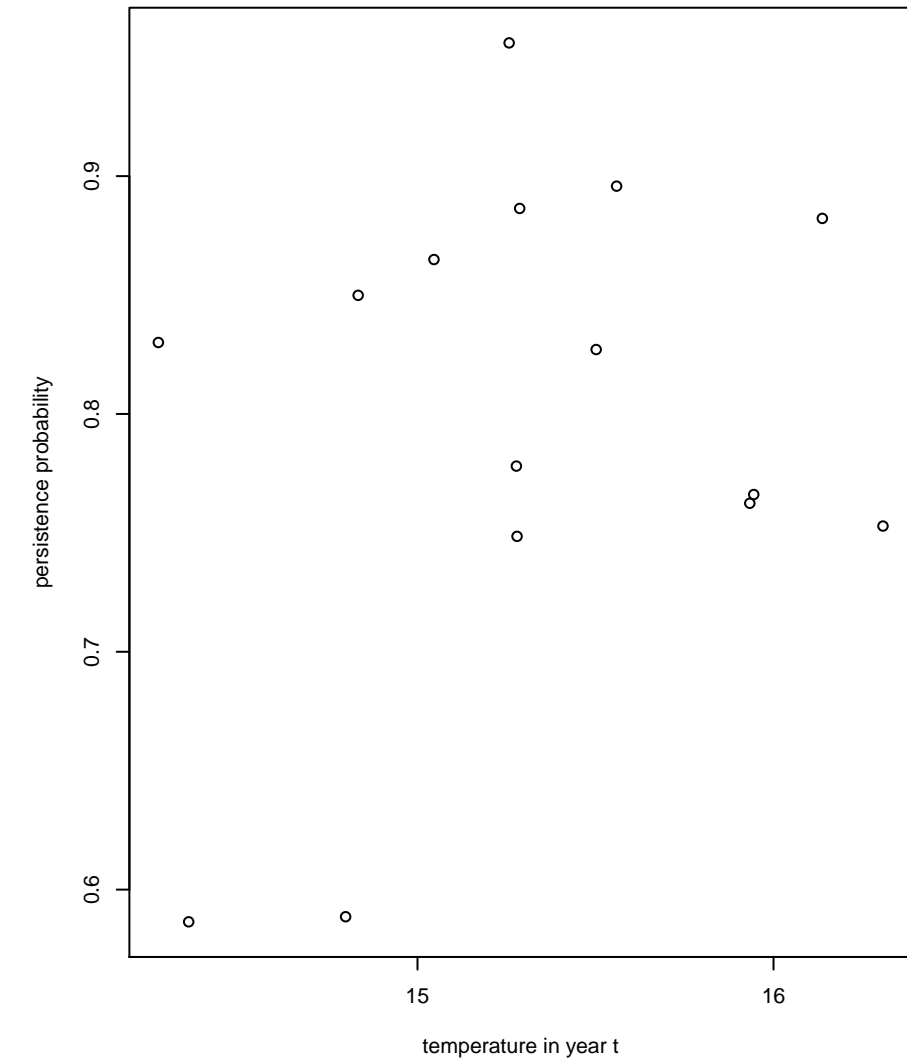

**Erythromma lindenii**

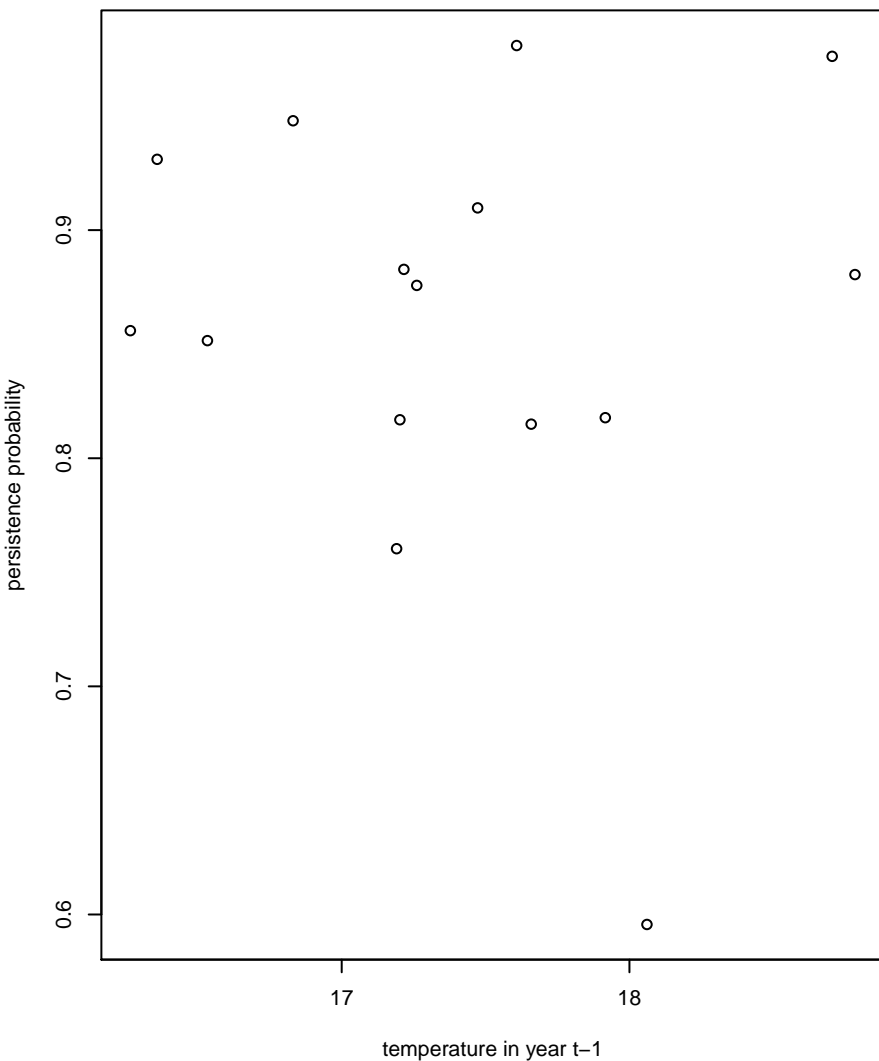

**Erythromma lindenii**

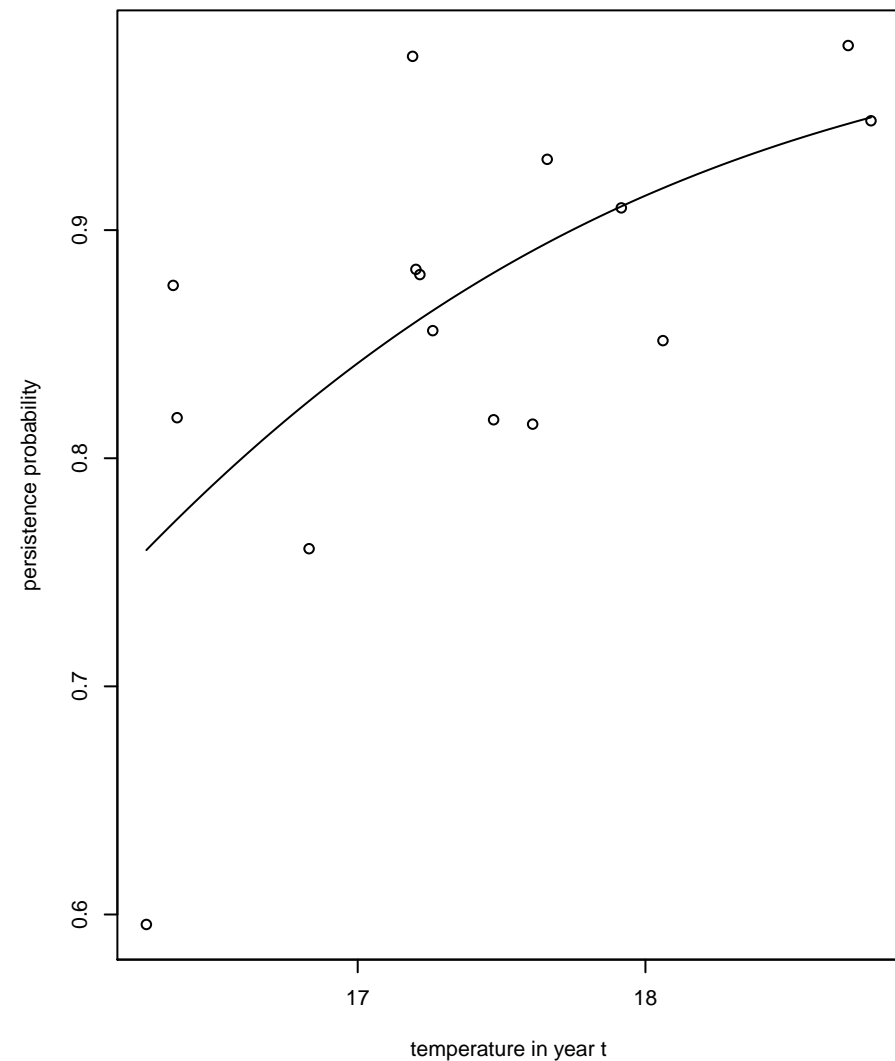

**Somatochlora flavomaculata**

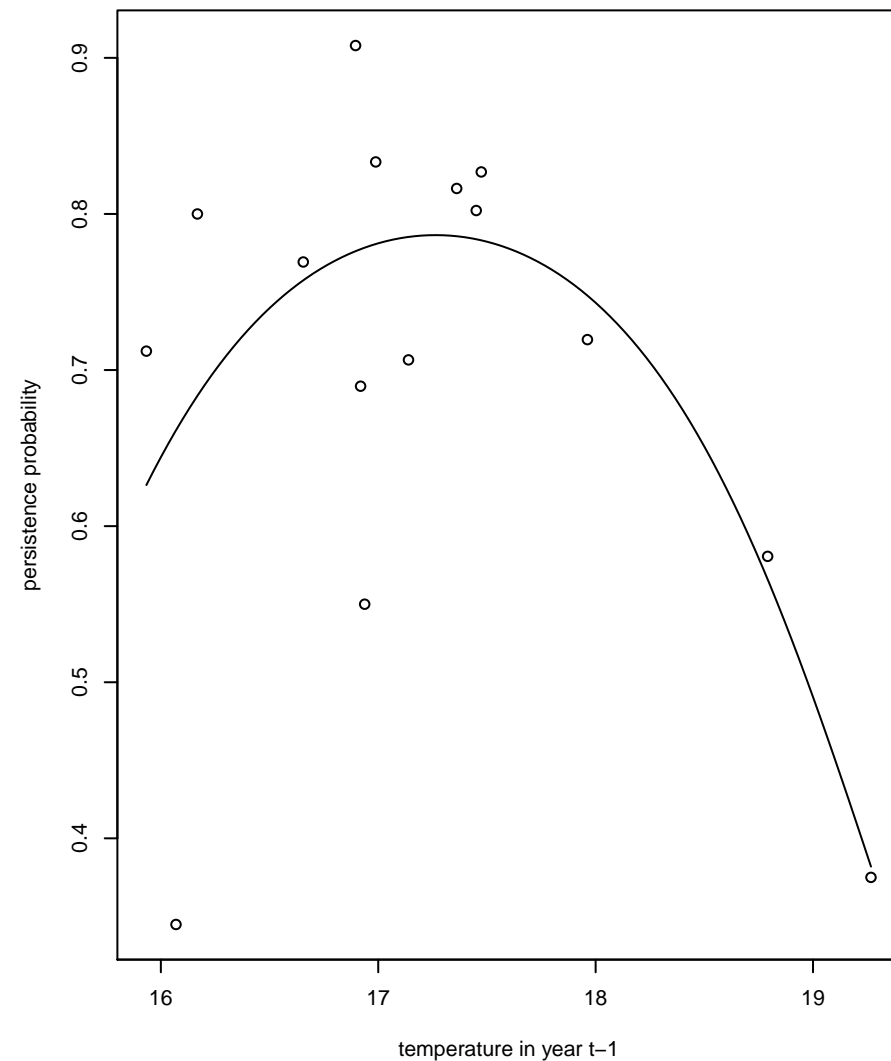

**Somatochlora flavomaculata**

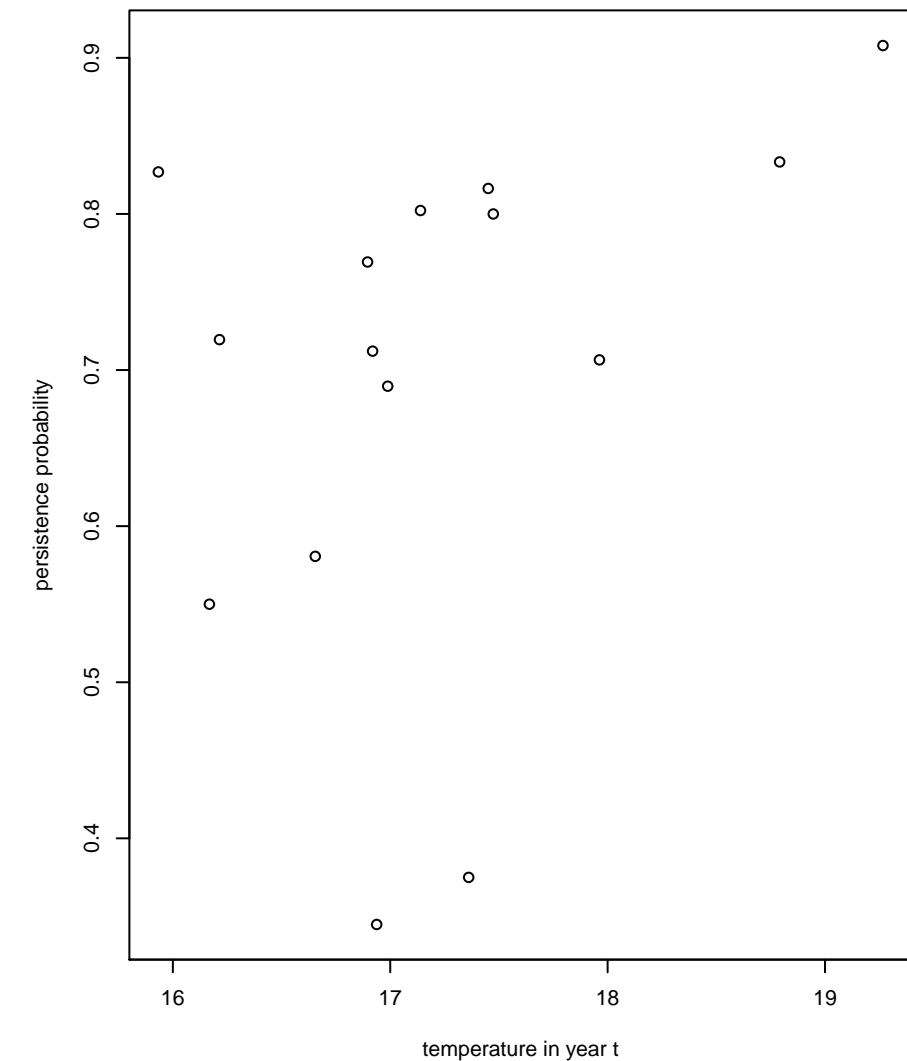

**Sympetrum depressiusculum**

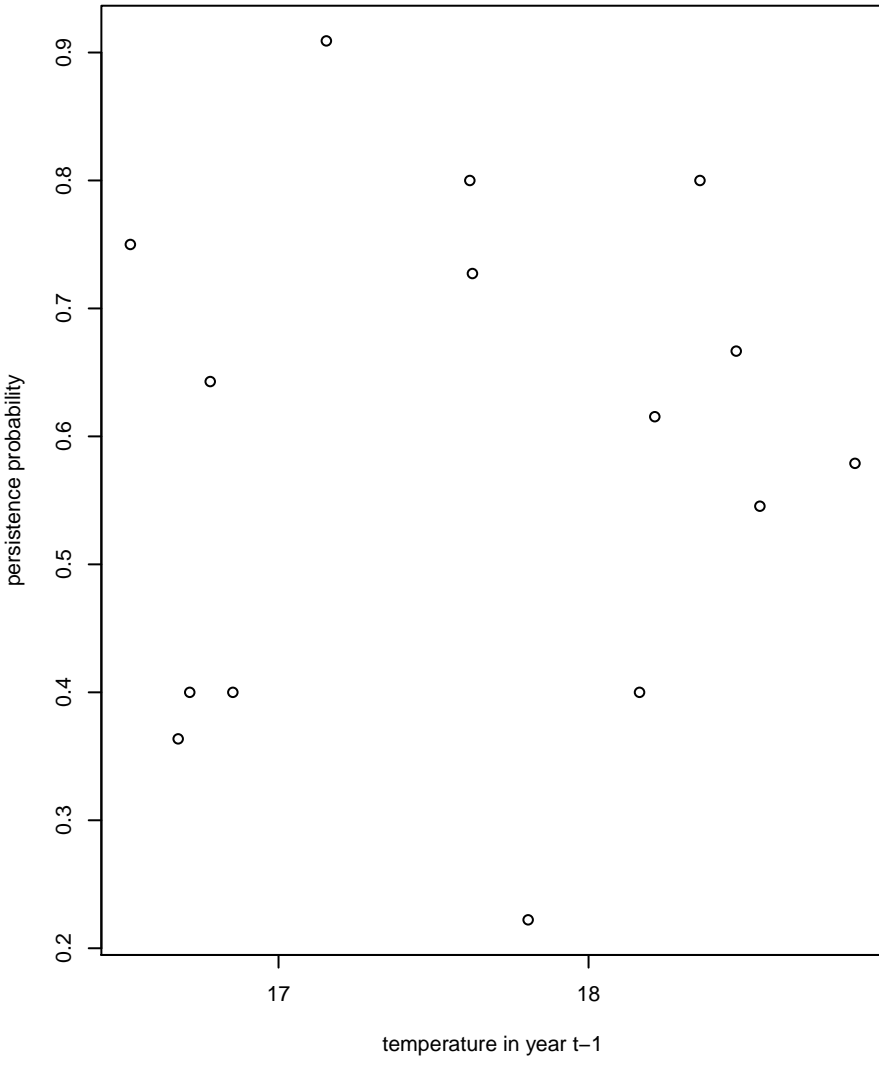

**Sympetrum depressiusculum**

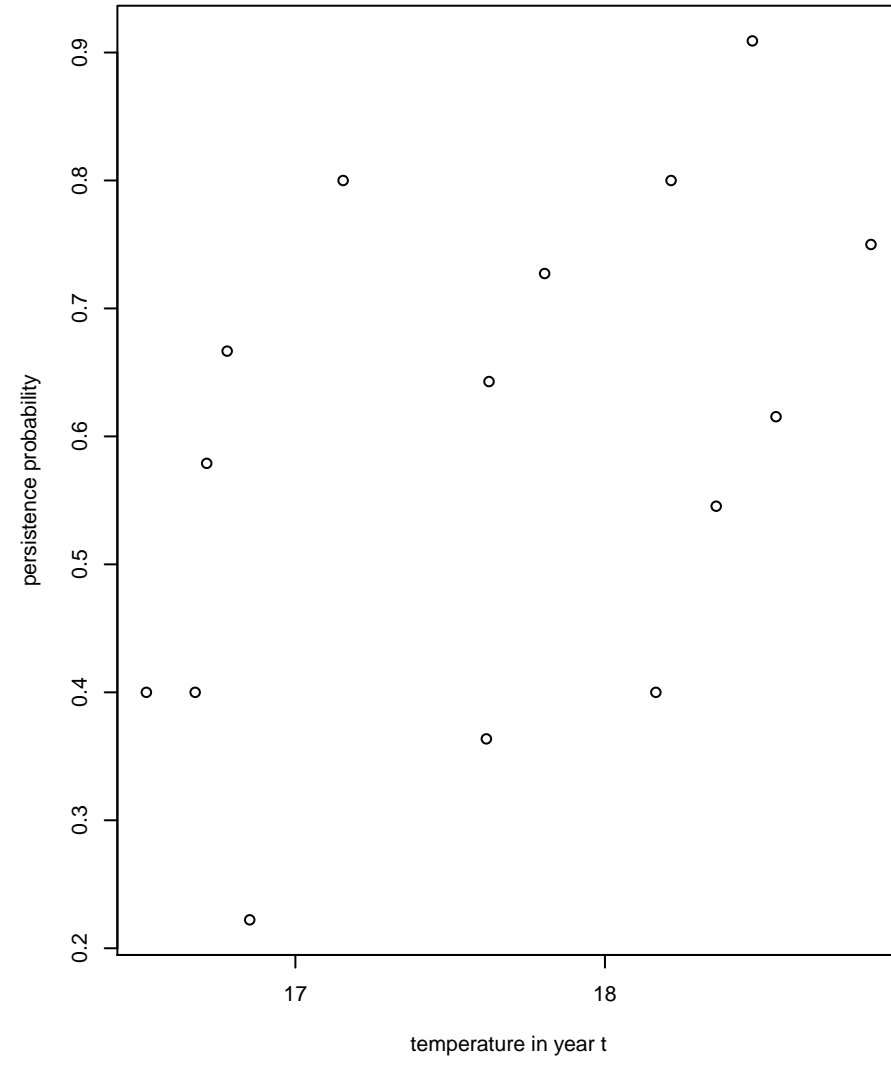

**Crocothemis erythraea**

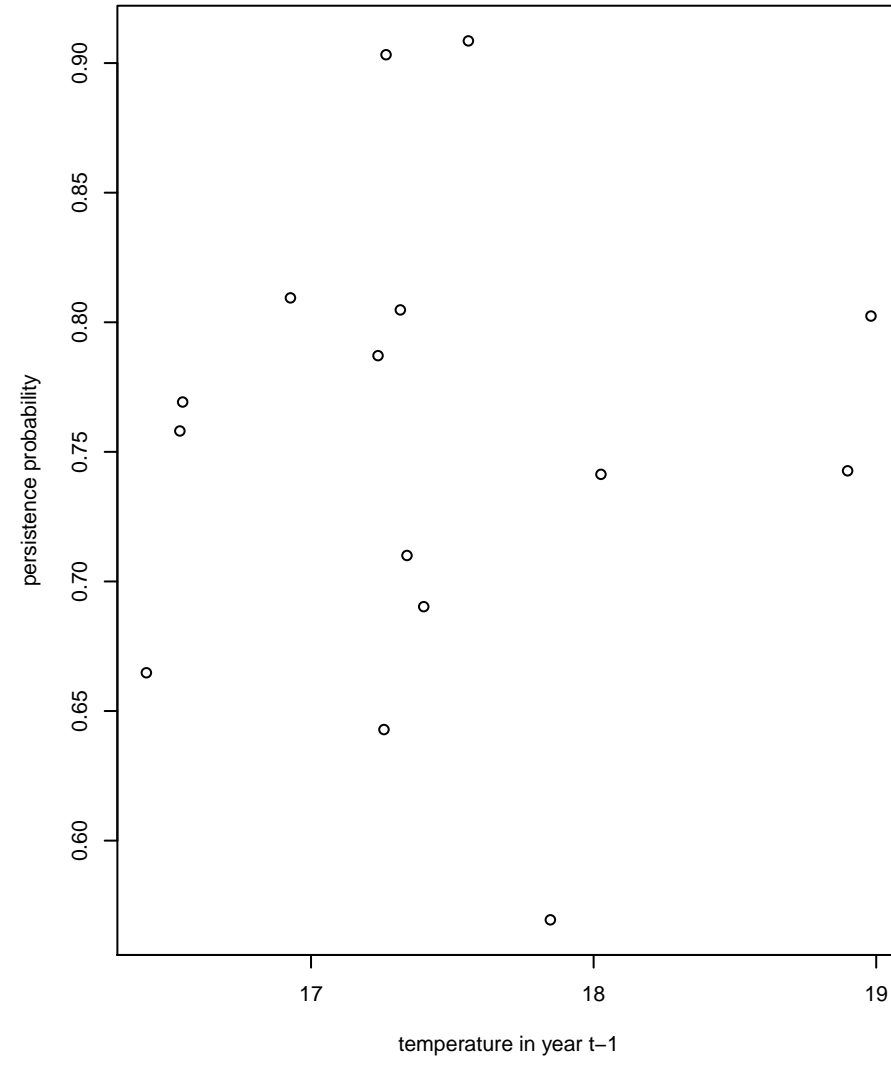

**Crocothemis erythraea**

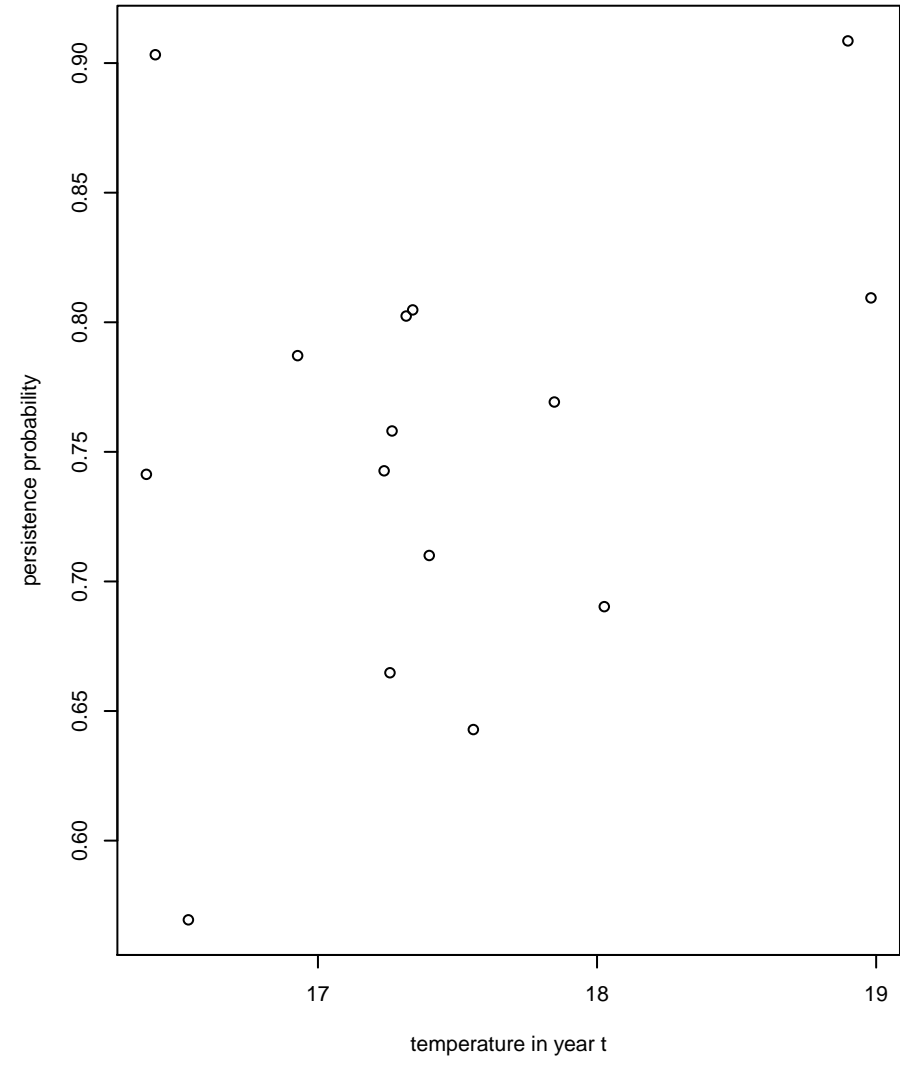

**Somatochlora arctica**

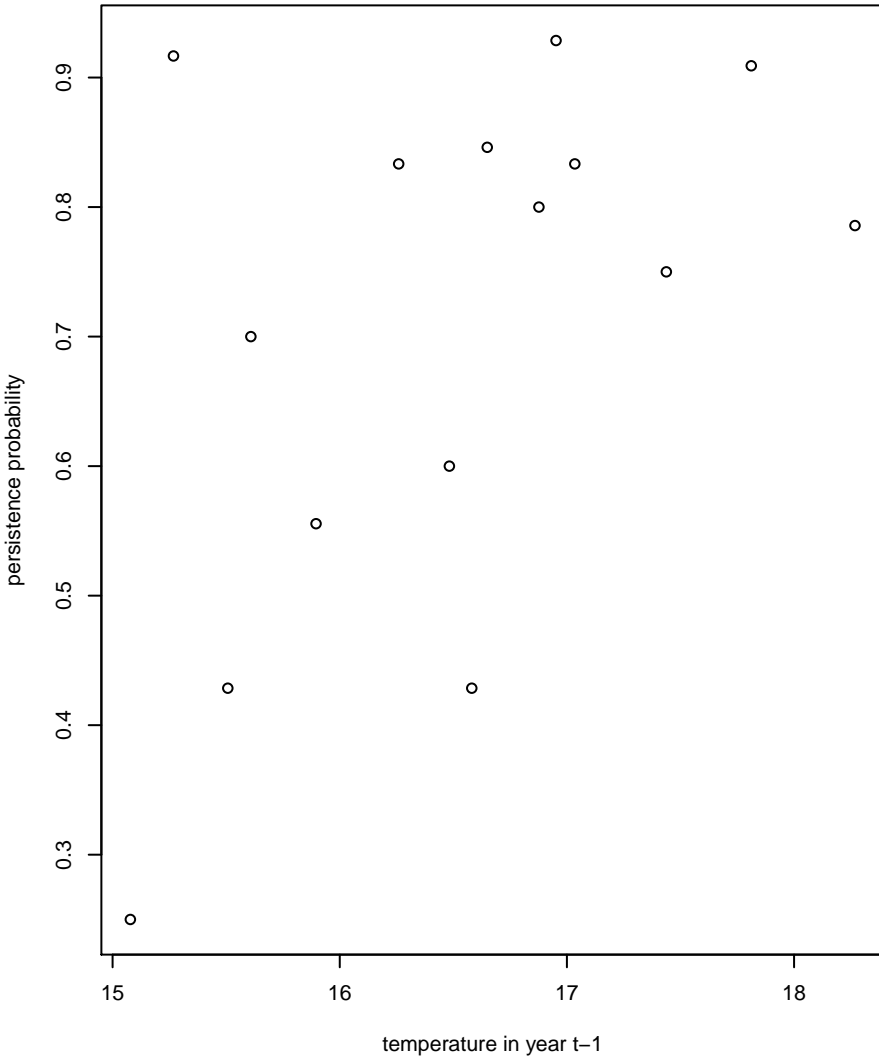

**Somatochlora arctica**

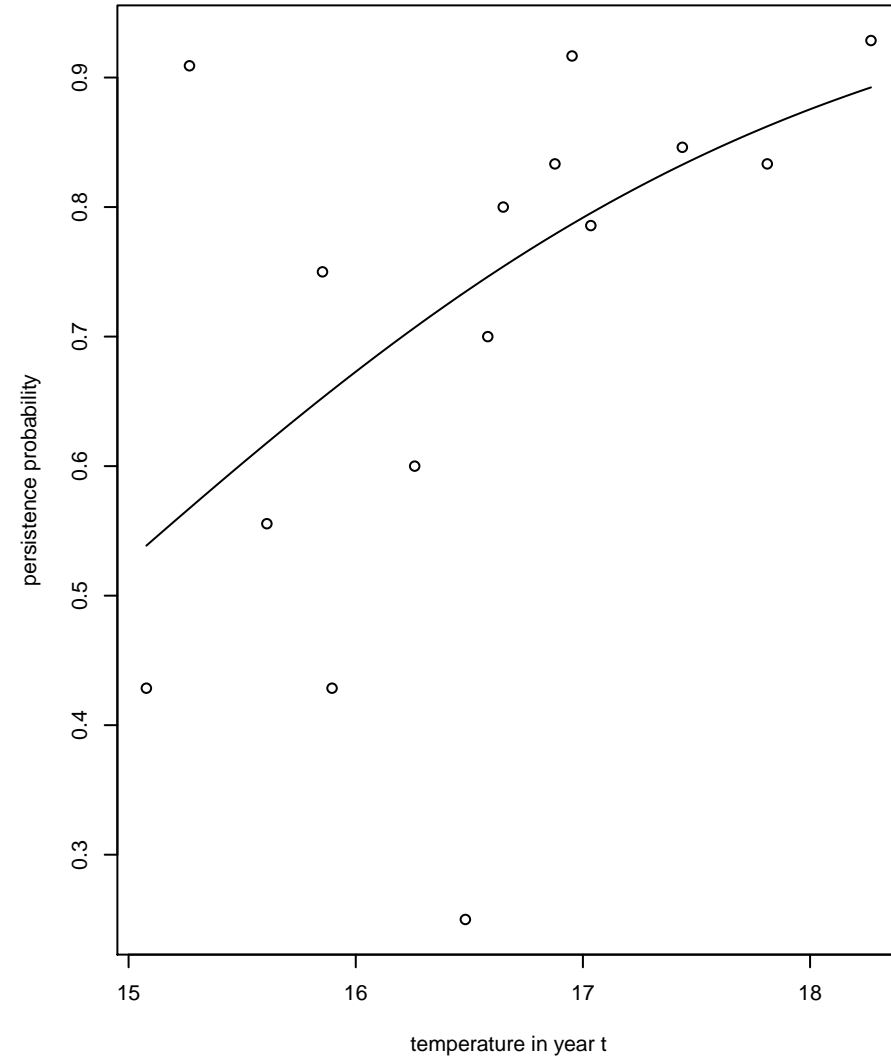

**Ophiogomphus cecilia**

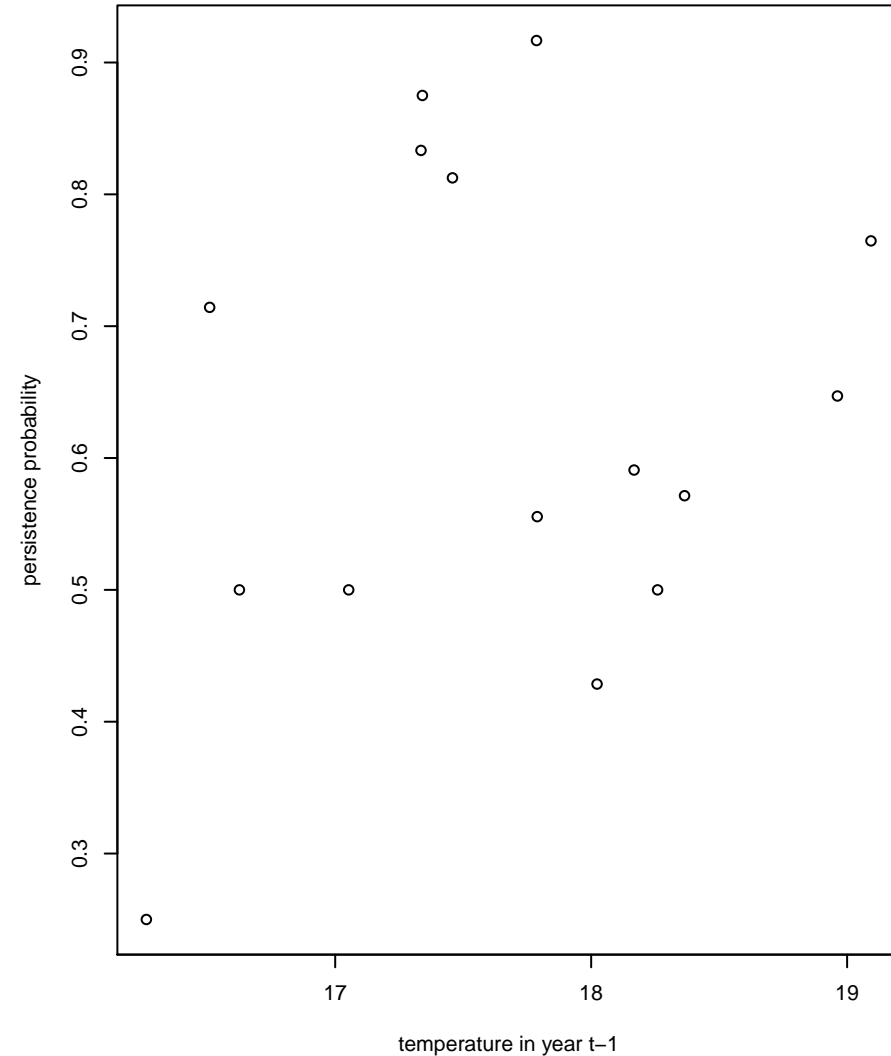

**Ophiogomphus cecilia**

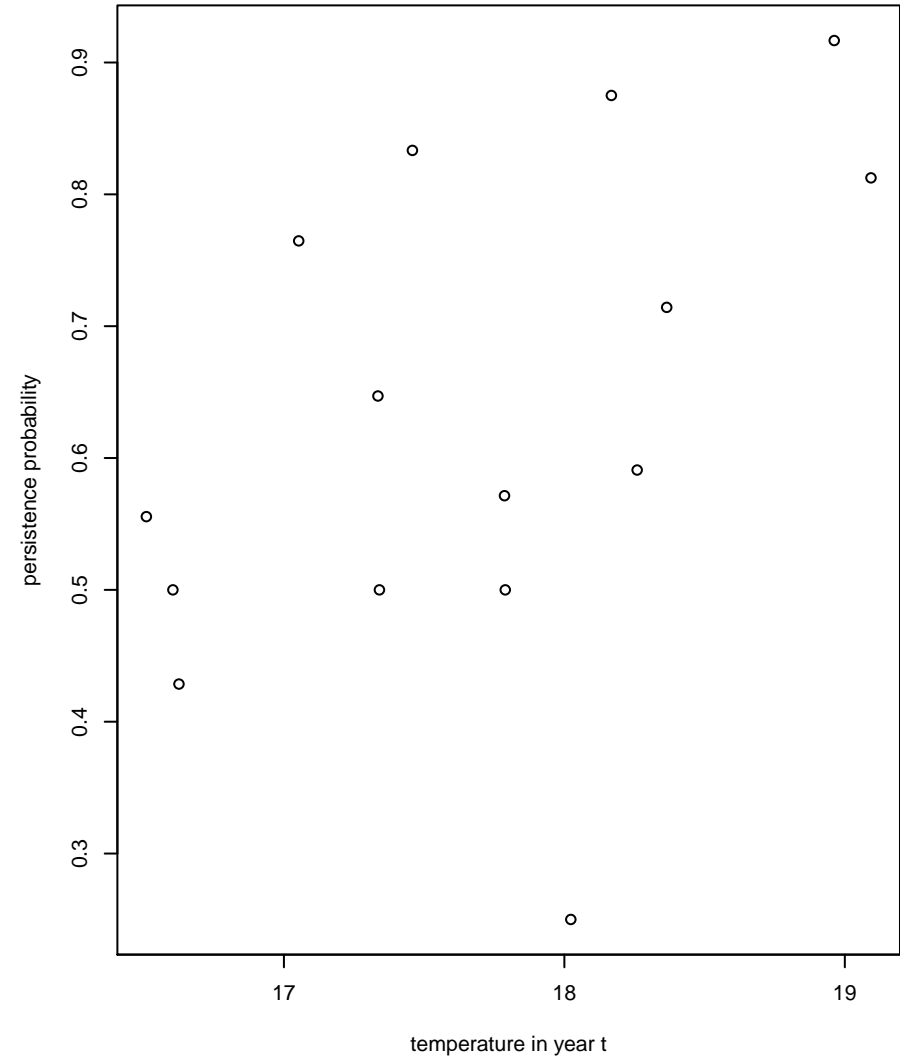

**Orthetrum brunneum**

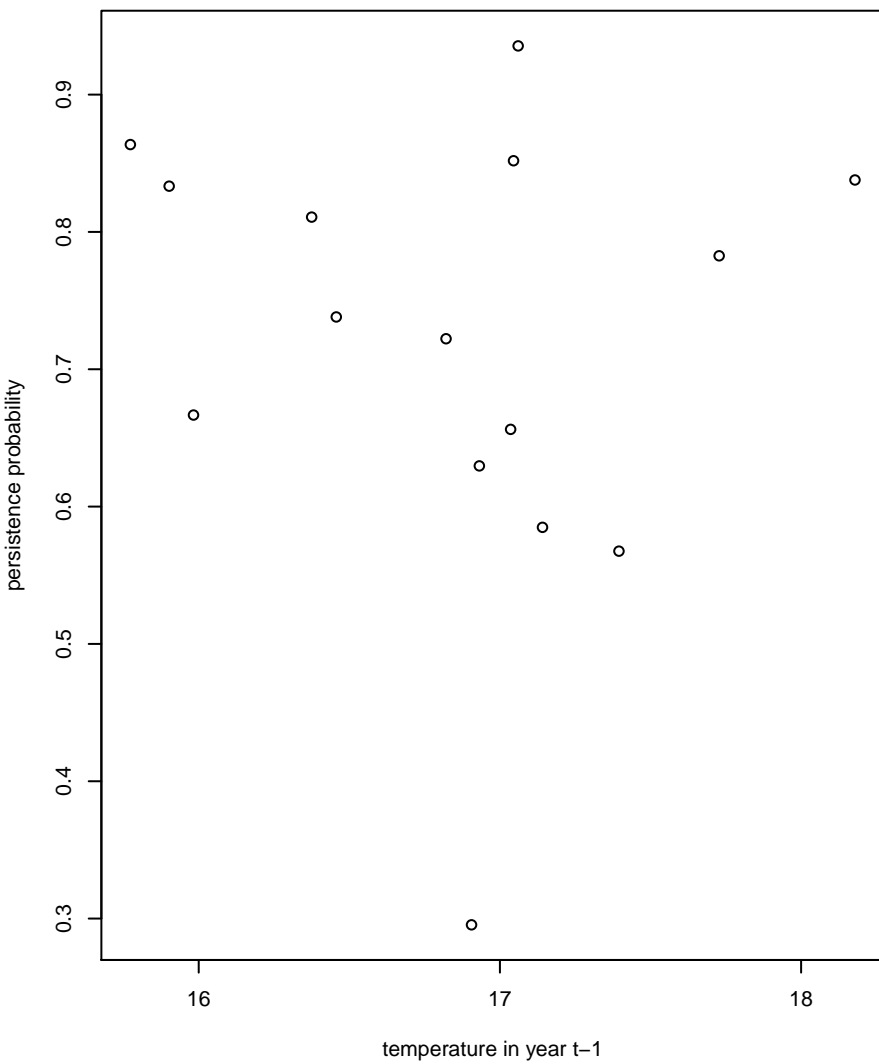

**Orthetrum brunneum**

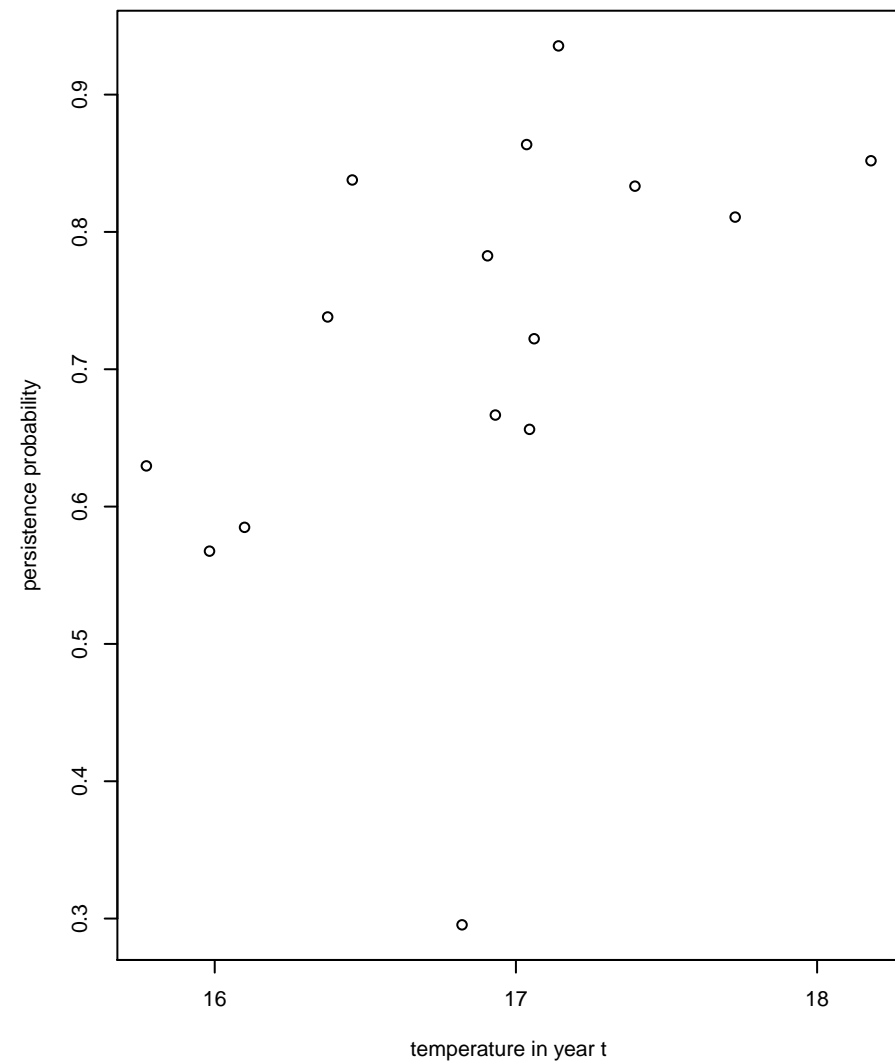

**Aeshna affinis**

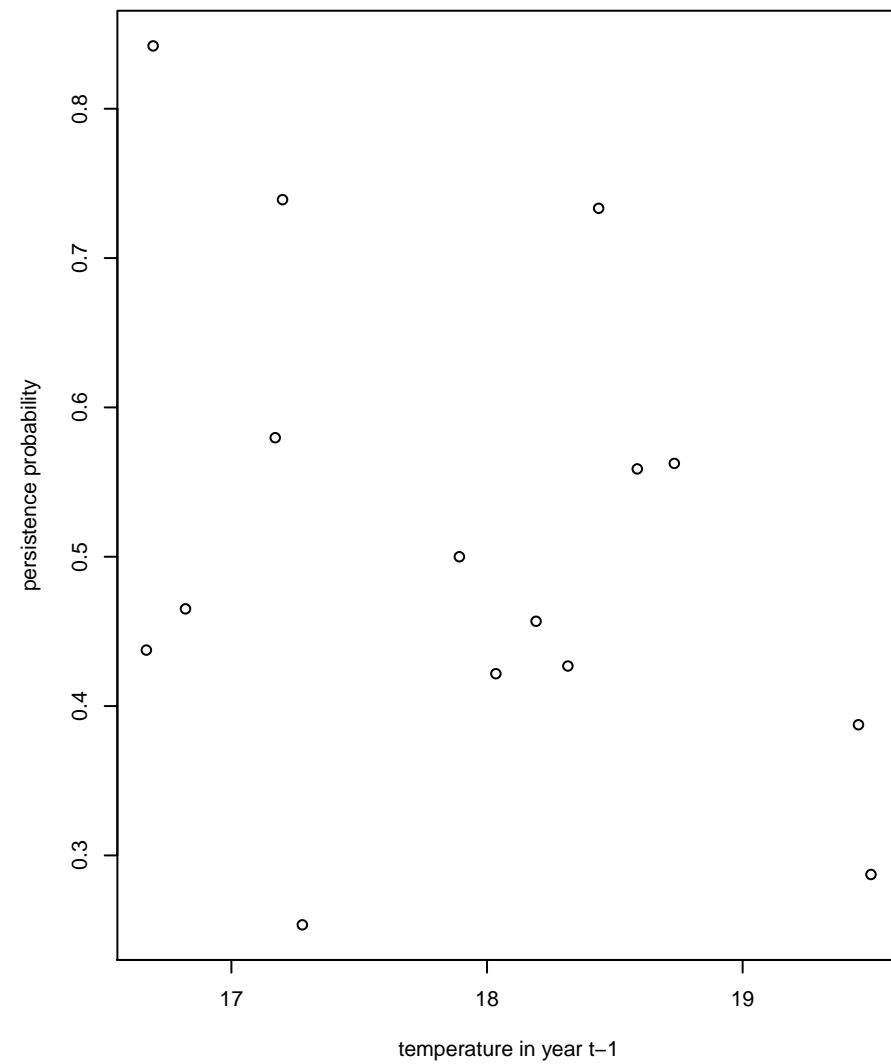

**Aeshna affinis**

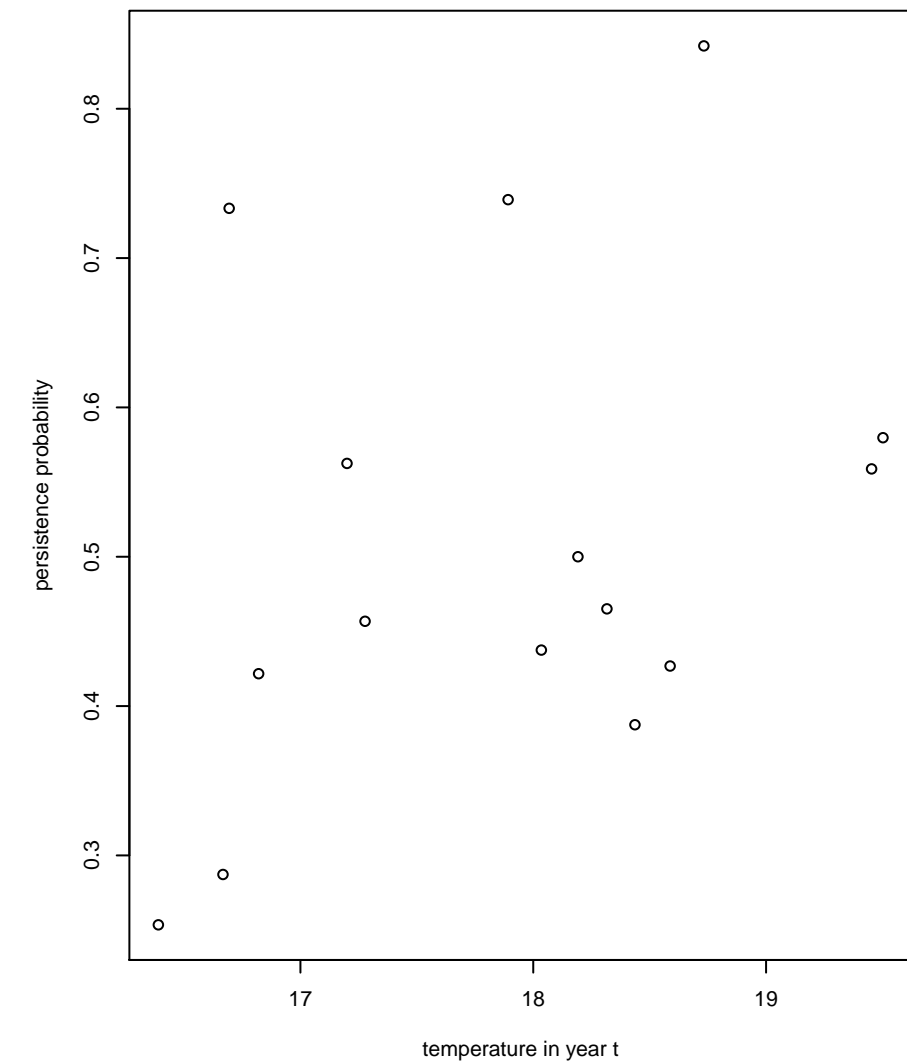

**Anax parthenope**

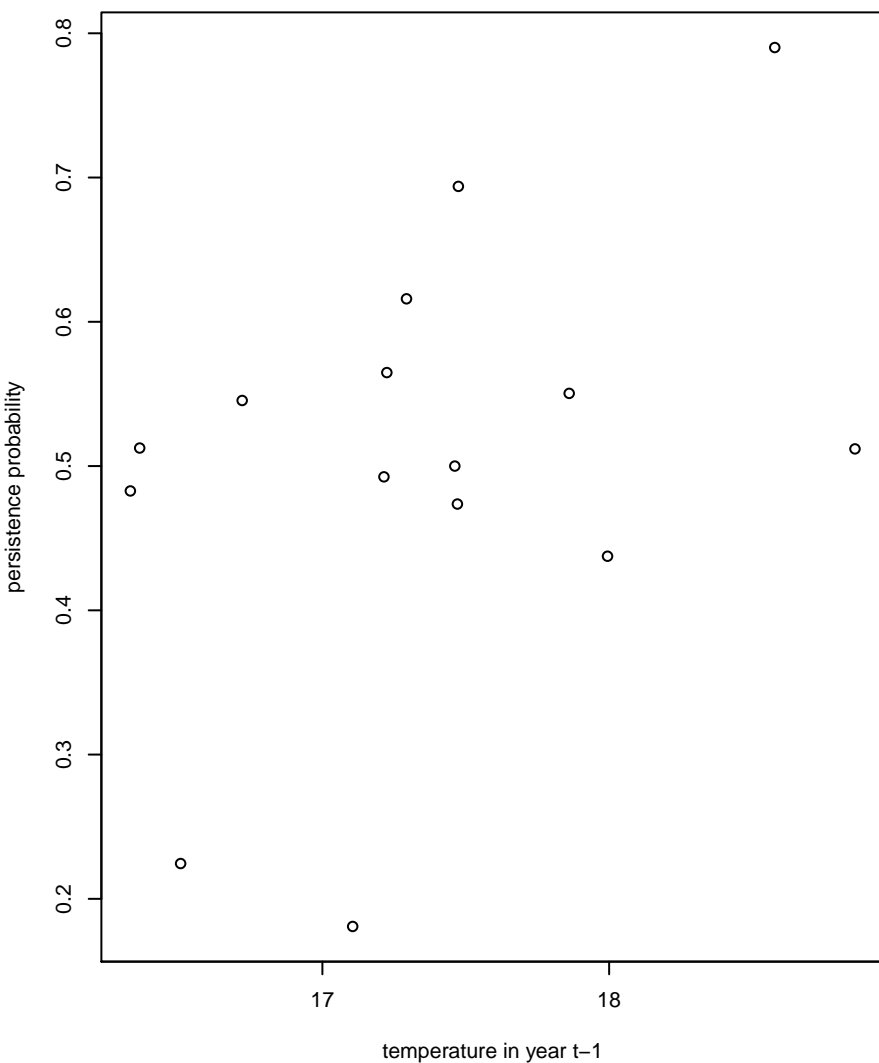

**Anax parthenope**

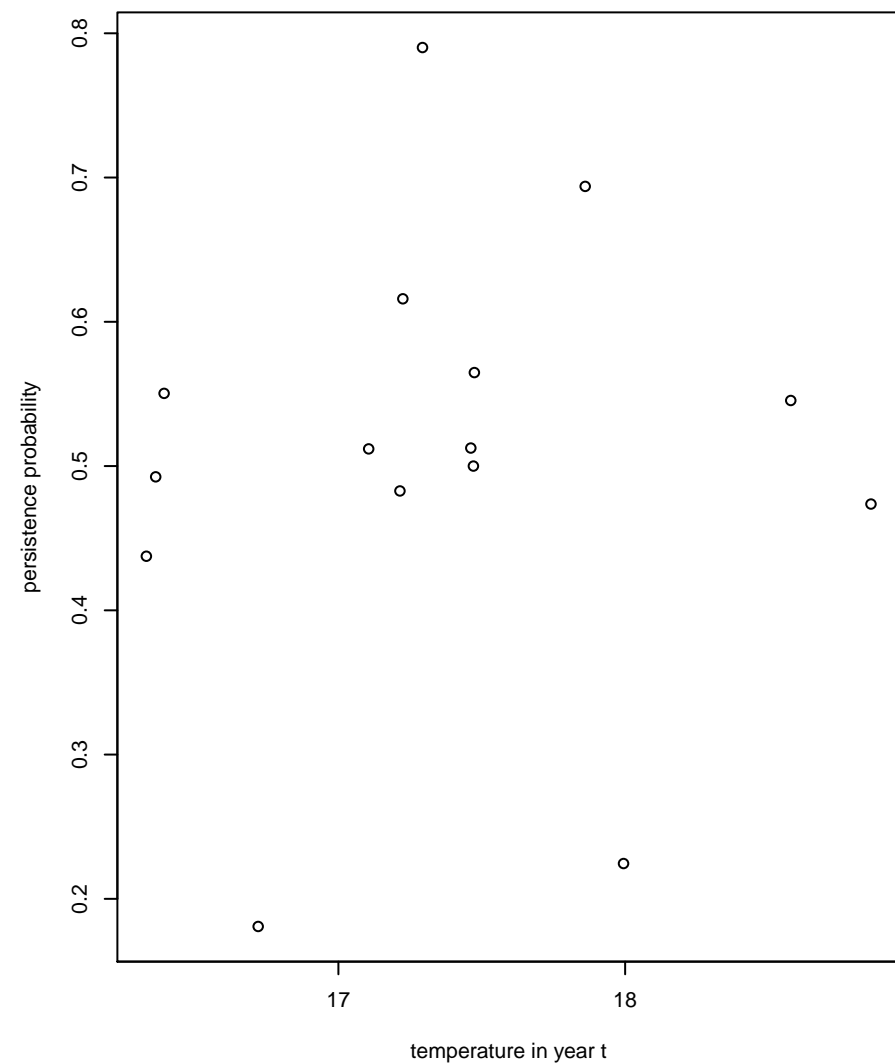

**Sympetrum pedemontanum**

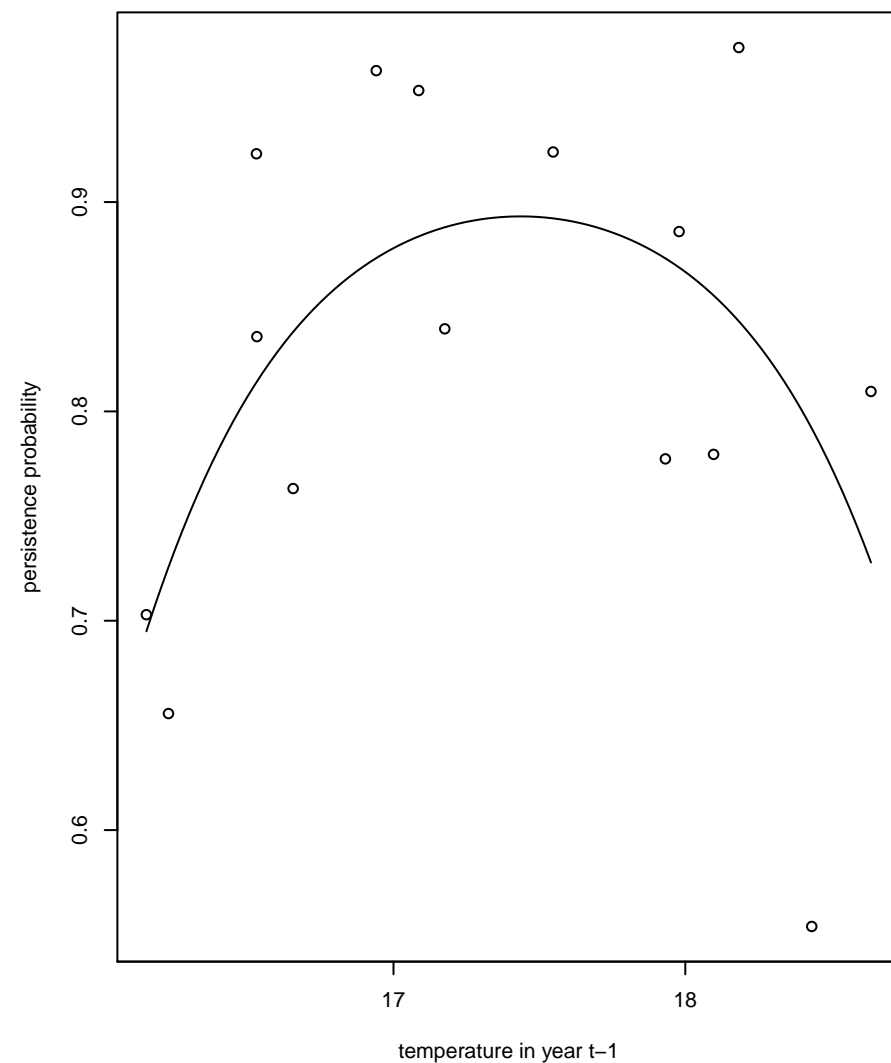

**Sympetrum pedemontanum**

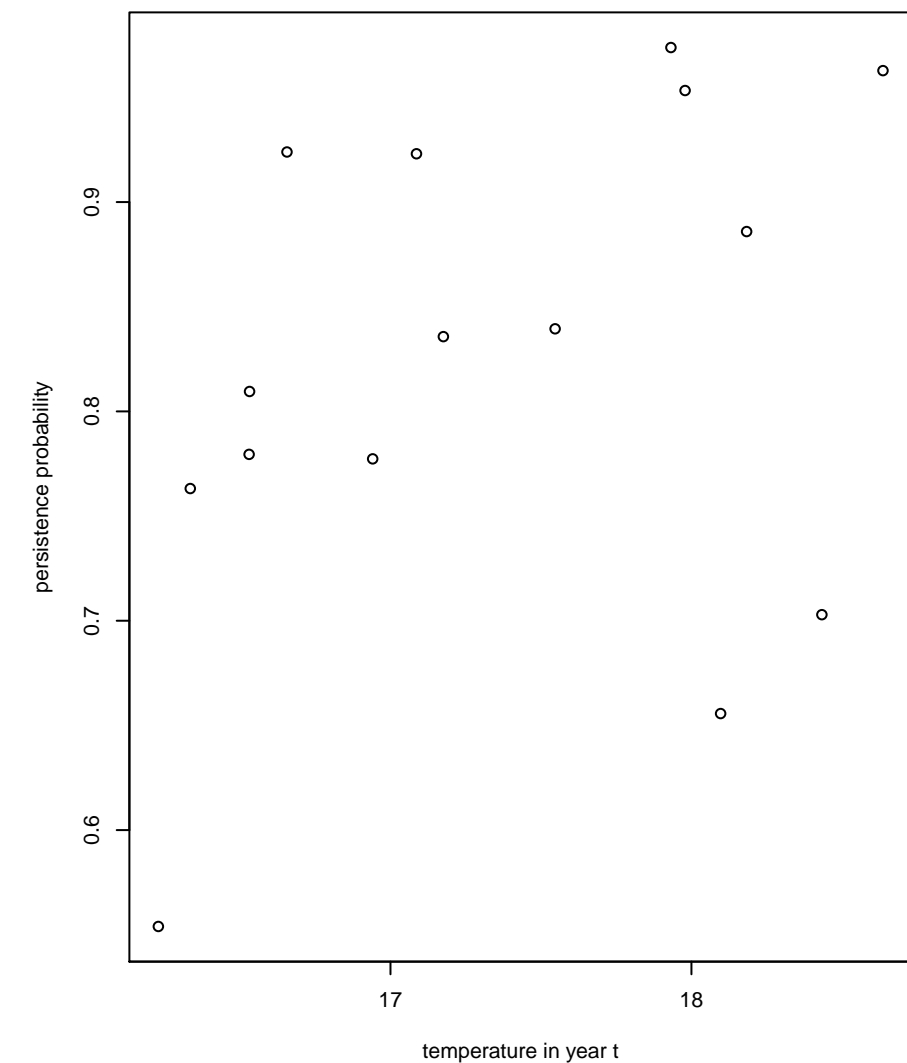

Supplement: pone.0110219.s004.pdf [file pone.0110219.s004.pdf]
